# Supplementary material for: Genomic aberrations in young and elderly breast cancer patients
Source: PubMed Central journal article supplement (PMC4606505; doi:10.1186/s12916-015-0504-3), 2015-10-15
Supplement: 12916_2015_504_MOESM2_ESM.pdf [file 12916_2015_504_MOESM2_ESM.pdf]

| Signature                                    | corr   | pval  | pval.adj | fdr.adj |
|----------------------------------------------|--------|-------|----------|---------|
| CREIGHTON_ENDOCRINE_THERAPY_RESISTANCE_DN    | -0,136 | 2E-04 | 1E-18    | 1E-14   |
| POSITIVE_REGULATION_OF_DNA_METABOLIC_PROCESS | -0,29  | 7E-16 | 2,3E-16  | 2E-12   |
| CREIGHTON_ENDOCRINE_THERAPY_RESISTANCE_DN    | -0,15  | 4E-05 | 1,2E-15  | 1E-11   |
| EGFR_UP.V1_DN                                | -0,187 | 3E-07 | 2,2E-15  | 2E-11   |
| MYLLYKANGAS_AMPLIFICATION_HOT_SPOT_3         | -0,27  | 7E-14 | 4,5E-15  | 5E-11   |
| MASSARWEH_TAMOXIFEN_RESISTANCE_DN            | -0,085 | 0,02  | 1,8E-14  | 2E-10   |
| chr4q33                                      | -0,265 | 2E-13 | 1,8E-14  | 2E-10   |
| NEBEN_AML_WITH_FLT3_OR_NRAS_DN               | -0,27  | 7E-14 | 4,8E-14  | 5E-10   |
| MATZUK_CUMULUS_EXPANSION                     | -0,188 | 2E-07 | 2,4E-13  | 2E-09   |
| JISON_SICKLE_CELL_DISEASE_DN                 | -0,221 | 1E-09 | 2,9E-13  | 3E-09   |
| V\$TAXCREB_02                                | -0,277 | 1E-14 | 3,8E-13  | 4E-09   |
| V\$E2F_Q6_01                                 | -0,258 | 8E-13 | 4,8E-13  | 5E-09   |
| KTGGYRSGAA_UNKNOWN                           | -0,269 | 7E-14 | 5,3E-13  | 5E-09   |
| MODULE_202                                   | -0,199 | 4E-08 | 1E-12    | 1E-08   |
| GSE27786_LIN_NEG_VS_NKCELL_UP                | -0,266 | 1E-13 | 1,3E-12  | 1E-08   |
| WILLIAMS_ESR1_TARGETS_UP                     | -0,184 | 5E-07 | 2E-12    | 2E-08   |
| REGULATION_OF_CELL_DIFFERENTIATION           | -0,183 | 5E-07 | 2E-12    | 2E-08   |
| REGULATION_OF_DNA_METABOLIC_PROCESS          | -0,264 | 3E-13 | 2,3E-12  | 2E-08   |
| PANGAS_TUMOR_SUPPRESSION_BY_SMAD1_4          | -0,197 | 6E-08 | 2,4E-12  | 2E-08   |
| V\$E2F_03                                    | -0,245 | 1E-11 | 5,1E-12  | 5E-08   |
| NIELSEN_GIST_AND_SYNOVIAL_SARCOMA_UP         | -0,208 | 1E-08 | 5,2E-12  | 5E-08   |
| GSE11924_TH2_VS_TH17_CD4_TCELL_DN            | -0,213 | 4E-09 | 5,3E-12  | 5E-08   |
| KEGG_TIGHT_JUNCTION                          | -0,228 | 3E-10 | 6,3E-12  | 6E-08   |
| FRASOR_RESPONSE_TO ESTRADIOL_UP              | -0,062 | 0,091 | 6,9E-12  | 7E-08   |
| MASSARWEH_RESPONSE_TO ESTRADIOL              | -0,062 | 0,091 | 8,4E-12  | 9E-08   |
| STAEGE_EWING_FAMILY_TUMOR                    | -0,176 | 1E-06 | 9E-12    | 9E-08   |
| SIG_PIP3_SIGNALING_IN_CARDIAC_MYOCYTES       | -0,212 | 5E-09 | 1E-11    | 1E-07   |
| V\$E2F_Q4_01                                 | -0,245 | 1E-11 | 1,2E-11  | 1E-07   |
| TRANSCRIPTION_COFACTOR_ACTIVITY              | -0,206 | 1E-08 | 1,3E-11  | 1E-07   |
| REGULATION_OF_CELL_CYCLE                     | -0,247 | 9E-12 | 1,4E-11  | 1E-07   |
| PID_NOTCH_PATHWAY                            | -0,216 | 3E-09 | 1,5E-11  | 2E-07   |
| KEGG_ERBB_SIGNALING_PATHWAY                  | -0,235 | 8E-11 | 1,6E-11  | 2E-07   |
| KEGG_P53_SIGNALING_PATHWAY                   | -0,255 | 2E-12 | 1,8E-11  | 2E-07   |
| SMID_BREAST_CANCER_ERBB2_DN                  | -0,198 | 5E-08 | 2,1E-11  | 2E-07   |
| BOYLAN_MULTIPLE_MYELOMA_C_CLUSTER_UP         | -0,245 | 1E-11 | 2,4E-11  | 2E-07   |
| GSE3982_BASOPHIL_VS_CENT_MEMORY_CD4          | -0,182 | 6E-07 | 2,4E-11  | 2E-07   |
| V\$TAXCREB_01                                | -0,212 | 5E-09 | 2,5E-11  | 3E-07   |
| VERHAAK_GLIOMASTOMA_PRONEURAL                | -0,239 | 4E-11 | 2,5E-11  | 3E-07   |
| DOUBLE_STRANDED_DNA_BINDING                  | -0,25  | 4E-12 | 2,9E-11  | 3E-07   |
| LUI_THYROID_CANCER_CLUSTER_1                 | -0,146 | 6E-05 | 3,7E-11  | 4E-07   |
| NUCLEUS                                      | -0,244 | 1E-11 | 3,9E-11  | 4E-07   |

|                                       |        |       |         |       |
|---------------------------------------|--------|-------|---------|-------|
| GSE11924_TH1_VS_TH2_CD4_TCELL_UP      | -0,211 | 6E-09 | 4,4E-11 | 4E-07 |
| V\$SPZ1_01                            | -0,197 | 6E-08 | 4,7E-11 | 5E-07 |
| V\$AREB6_03                           | -0,167 | 4E-06 | 4,7E-11 | 5E-07 |
| V\$E2F_Q3_01                          | -0,239 | 4E-11 | 5,5E-11 | 6E-07 |
| V\$PAX3_B                             | -0,207 | 1E-08 | 5,6E-11 | 6E-07 |
| chr4q34                               | -0,183 | 5E-07 | 8,1E-11 | 8E-07 |
| DEURIG_T_CELL_PROLYMPHOCYTIC_LEUKEMIA | -0,228 | 3E-10 | 8,5E-11 | 9E-07 |
| STRUCTURE_SPECIFIC_DNA_BINDING        | -0,248 | 7E-12 | 8,5E-11 | 9E-07 |
| PID_ERBB_NETWORK_PATHWAY              | -0,223 | 8E-10 | 8,9E-11 | 9E-07 |
| GSE3982_NEUTROPHIL_VS_TH2_DN          | -0,248 | 6E-12 | 1,1E-10 | 1E-06 |
| TRANSCRIPTION_COACTIVATOR_ACTIVITY    | -0,188 | 3E-07 | 1,3E-10 | 1E-06 |
| MARTINEZ_RB1_AND_TP53_TARGETS_DN      | -0,226 | 4E-10 | 1,3E-10 | 1E-06 |
| TRANSCRIPTION_ACTIVATOR_ACTIVITY      | -0,191 | 2E-07 | 1,4E-10 | 1E-06 |
| REACTOME_CELL_JUNCTION_ORGANIZATION   | -0,23  | 2E-10 | 1,4E-10 | 1E-06 |
| GSE33513_TCF7_KO_VS_HET_EARLY_THYMI   | -0,189 | 2E-07 | 1,5E-10 | 2E-06 |
| MIKKELSEN_MEF_ICP_WITH_H3K4ME3_AND_I  | -0,184 | 4E-07 | 1,5E-10 | 2E-06 |
| LOPEZ_TRANSLATION_VIA_FN1_SIGNALING   | -0,207 | 1E-08 | 1,5E-10 | 2E-06 |
| V\$E2F1_Q4_01                         | -0,235 | 8E-11 | 1,6E-10 | 2E-06 |
| BENPORATH_SOX2_TARGETS                | -0,247 | 8E-12 | 1,6E-10 | 2E-06 |
| REACTOME_PI3K_AKT_ACTIVATION          | -0,139 | 1E-04 | 1,6E-10 | 2E-06 |
| HONRADO_BREAST_CANCER_BRCA1_VS_BRC    | -0,245 | 1E-11 | 1,7E-10 | 2E-06 |
| GSE27786_LIN_NEG_VS_ERYTHROBLAST_DN   | -0,178 | 1E-06 | 1,9E-10 | 2E-06 |
| TRANSCRIPTION_FACTOR_BINDING          | -0,198 | 5E-08 | 1,9E-10 | 2E-06 |
| PEDERSEN_METASTASIS_BY_ERBB2_ISOFORM  | -0,217 | 2E-09 | 1,9E-10 | 2E-06 |
| MCCABE_HOXC6_TARGETS_CANCER_UP        | -0,186 | 3E-07 | 2,3E-10 | 2E-06 |
| GSE37416_CTRL_VS_OH_F_TULARENSIS_LV!  | -0,205 | 2E-08 | 2,4E-10 | 3E-06 |
| GLUTAMATE_SIGNALING_PATHWAY           | -0,174 | 2E-06 | 2,6E-10 | 3E-06 |
| GSE27786_ERYTHROBLAST_VS_MONO_MAC_    | -0,214 | 3E-09 | 2,6E-10 | 3E-06 |
| V\$HMGYI_Q6                           | -0,215 | 3E-09 | 2,8E-10 | 3E-06 |
| REACTOME_CELL_CELL_JUNCTION_ORGANIZA  | -0,24  | 3E-11 | 2,8E-10 | 3E-06 |
| CUI_TCF21_TARGETS_2_UP                | -0,217 | 2E-09 | 2,9E-10 | 3E-06 |
| MUSCLE_CELL_DIFFERENTIATION           | -0,163 | 7E-06 | 3E-10   | 3E-06 |
| NUCLEOBASENUCLEOSIDENUCLEOTIDE_AND_I  | -0,223 | 8E-10 | 3E-10   | 3E-06 |
| V\$EGR1_01                            | -0,198 | 5E-08 | 3,4E-10 | 3E-06 |
| NIELSEN_LEIOMYOSARCOMA_CNN1_UP        | -0,204 | 2E-08 | 3,5E-10 | 4E-06 |
| CONCANNON_APOPTOSIS_BY_EPOXOMICIN_D   | -0,233 | 1E-10 | 3,8E-10 | 4E-06 |
| V\$E2F_Q2                             | -0,19  | 2E-07 | 3,9E-10 | 4E-06 |
| GNF2_CDH3                             | -0,235 | 9E-11 | 3,9E-10 | 4E-06 |
| REGULATION_OF_DNA_REPLICATION         | -0,233 | 1E-10 | 4E-10   | 4E-06 |
| V\$AP2_Q6_01                          | -0,188 | 2E-07 | 4,3E-10 | 4E-06 |
| DUTERTRE ESTRADIOL_RESPONSE_6HR_UP    | -0,167 | 5E-06 | 4,4E-10 | 4E-06 |
| INTRACELLULAR_NON_MEMBRANE_BOUND_O    | -0,241 | 3E-11 | 4,5E-10 | 5E-06 |

|                                       |        |       |         |       |
|---------------------------------------|--------|-------|---------|-------|
| NON_MEMBRANE_BOUND_ORGANELLE          | -0,241 | 3E-11 | 4,5E-10 | 5E-06 |
| ASTON_MAJOR_DEPRESSIVE_DISORDER_UP    | -0,182 | 6E-07 | 4,8E-10 | 5E-06 |
| PHOSPHATE_TRANSMEMBRANE_TRANSPORTE    | -0,216 | 2E-09 | 4,9E-10 | 5E-06 |
| ARGGGTTAA_UNKNOWN                     | -0,163 | 8E-06 | 5,5E-10 | 6E-06 |
| YANG_BREAST_CANCER_ESR1_DN            | -0,204 | 2E-08 | 5,6E-10 | 6E-06 |
| V\$CREB_Q3                            | -0,163 | 8E-06 | 5,9E-10 | 6E-06 |
| REACTOME_PI3K_EVENTS_IN_ERBB4_SIGNALI | -0,17  | 3E-06 | 5,9E-10 | 6E-06 |
| GSE12845_IGD_NEG_BLOOD_VS_DARKZONE_   | -0,243 | 2E-11 | 6,1E-10 | 6E-06 |
| GSE3982_BASOPHIL_VS_TH2_DN            | -0,234 | 1E-10 | 6,6E-10 | 7E-06 |
| V\$AP2ALPHA_01                        | -0,196 | 7E-08 | 6,6E-10 | 7E-06 |
| RNA_METABOLIC_PROCESS                 | -0,214 | 3E-09 | 6,8E-10 | 7E-06 |
| YAO_TEMPORAL_RESPONSE_TO_PROGESTERC   | -0,141 | 1E-04 | 6,9E-10 | 7E-06 |
| RRCCGTTA_UNKNOWN                      | -0,234 | 1E-10 | 7E-10   | 7E-06 |
| LANDEMAINE_LUNG_METASTASIS            | -0,188 | 3E-07 | 7,6E-10 | 8E-06 |
| KCCGNSWTTT_UNKNOWN                    | -0,213 | 4E-09 | 7,6E-10 | 8E-06 |
| CELL_CYCLE_ARREST_GO_0007050          | -0,224 | 6E-10 | 7,6E-10 | 8E-06 |
| WANG_NEOPLASTIC_TRANSFORMATION_BY_C   | -0,174 | 2E-06 | 7,7E-10 | 8E-06 |
| DNA_METABOLIC_PROCESS                 | -0,209 | 8E-09 | 7,9E-10 | 8E-06 |
| LE_SKI_TARGETS_DN                     | -0,181 | 7E-07 | 8E-10   | 8E-06 |
| REGULATION_OF_MITOTIC_CELL_CYCLE      | -0,213 | 4E-09 | 8,4E-10 | 9E-06 |
| ZHENG_GLIOMASTOMA_PLASTICITY_UP       | -0,24  | 3E-11 | 8,5E-10 | 9E-06 |
| GSE20366_CD103_KLRG1_DP_VS_DN_TREG.   | -0,161 | 1E-05 | 8,7E-10 | 9E-06 |
| GSE14000_TRANSLATED_RNA_VS_MRNA_16    | -0,165 | 6E-06 | 8,9E-10 | 9E-06 |
| CADWELL_ATG16L1_TARGETS_DN            | -0,208 | 1E-08 | 9E-10   | 9E-06 |
| REACTOME_SHC1_EVENTS_IN_ERBB4_SIGNAL  | -0,224 | 7E-10 | 9,3E-10 | 1E-05 |
| V\$E2F1_Q4                            | -0,22  | 1E-09 | 9,5E-10 | 1E-05 |
| DARWICHE_PAPILLOMA_RISK_HIGH_VS_LOW_  | -0,151 | 3E-05 | 1E-09   | 1E-05 |
| V\$ER_Q6_01                           | -0,17  | 3E-06 | 1,1E-09 | 1E-05 |
| GSE8515_IL1_VS_IL6_4H_STIM_)MAC_DN    | -0,113 | 0,002 | 1,1E-09 | 1E-05 |
| NEGATIVE_REGULATION_OF_NUCLEOBASENUC  | -0,186 | 3E-07 | 1,2E-09 | 1E-05 |
| MODULE_533                            | -0,2   | 3E-08 | 1,2E-09 | 1E-05 |
| GSE27786_CD8_TCELL_VS_NKCELL_UP       | -0,197 | 6E-08 | 1,3E-09 | 1E-05 |
| FIGUEROA_AML_METHYLATION_CLUSTER_2_I  | -0,212 | 5E-09 | 1,3E-09 | 1E-05 |
| PRC2_EZH2_UP.V1_UP                    | -0,227 | 4E-10 | 1,4E-09 | 1E-05 |
| CELL_CYCLE_GO_0007049                 | -0,213 | 5E-09 | 1,5E-09 | 2E-05 |
| GSE10325_MYELOID_VS_LUPUS_MYELOID_UF  | -0,149 | 4E-05 | 1,5E-09 | 2E-05 |
| GSE3982_NEUTROPHIL_VS_CENT_MEMORY_C   | -0,212 | 5E-09 | 1,6E-09 | 2E-05 |
| GSE3982_EFF_MEMORY_VS_CENT_MEMORY_    | -0,181 | 7E-07 | 1,7E-09 | 2E-05 |
| V\$ER_Q6                              | -0,167 | 4E-06 | 1,7E-09 | 2E-05 |
| V\$E2F_01                             | -0,239 | 4E-11 | 1,8E-09 | 2E-05 |
| V\$AHR_01                             | -0,201 | 3E-08 | 1,9E-09 | 2E-05 |
| GSE1448_CTRL_VS_ANTI_VALPHA2_DP_THY   | -0,215 | 3E-09 | 2E-09   | 2E-05 |

|                                        |        |       |         |       |
|----------------------------------------|--------|-------|---------|-------|
| GSE3982_CENT_MEMORY_CD4_TCELL_VS_N     | -0,171 | 3E-06 | 2E-09   | 2E-05 |
| NEGATIVE_REGULATION_OF_TRANSCRIPTION   | -0,168 | 4E-06 | 2E-09   | 2E-05 |
| GNF2_SERPINB5                          | -0,226 | 4E-10 | 2E-09   | 2E-05 |
| REACTOME_ACTIVATED_NOTCH1_TRANSMITS    | -0,19  | 2E-07 | 2,1E-09 | 2E-05 |
| MCCABE_BOUND_BY_HOXC6                  | -0,151 | 3E-05 | 2,3E-09 | 2E-05 |
| CAHOY_OLIGODENDROCUTIC                 | -0,195 | 8E-08 | 2,3E-09 | 2E-05 |
| KIM_MYCN_AMPLIFICATION_TARGETS_UP      | -0,196 | 7E-08 | 2,4E-09 | 2E-05 |
| GNF2_RTN1                              | -0,188 | 2E-07 | 2,5E-09 | 2E-05 |
| REGULATION_OF_TRANSCRIPTION_FROM_RNA   | -0,178 | 1E-06 | 2,5E-09 | 3E-05 |
| CTGRYYYYNATT_UNKNOWN                   | -0,194 | 9E-08 | 2,6E-09 | 3E-05 |
| GNF2_AF1Q                              | -0,19  | 2E-07 | 2,6E-09 | 3E-05 |
| DORN_ADENOVIRUS_INFECTION_24HR_UP      | -0,188 | 2E-07 | 2,6E-09 | 3E-05 |
| TURASHVILI_BREAST_DUCTAL_CARCINOMA_\   | -0,168 | 4E-06 | 2,7E-09 | 3E-05 |
| REACTOME_SIGNALING_BY_ERBB2            | -0,163 | 8E-06 | 2,7E-09 | 3E-05 |
| V\$CREB_Q2                             | -0,191 | 2E-07 | 2,7E-09 | 3E-05 |
| POSITIVE_REGULATION_OF_CELL_DIFFERENTI | -0,148 | 5E-05 | 2,8E-09 | 3E-05 |
| V\$LBP1_Q6                             | -0,154 | 3E-05 | 2,8E-09 | 3E-05 |
| MODULE_438                             | -0,229 | 3E-10 | 2,8E-09 | 3E-05 |
| PID_DELTANP63PATHWAY                   | -0,218 | 2E-09 | 2,9E-09 | 3E-05 |
| V\$MYB_Q6                              | -0,161 | 1E-05 | 3E-09   | 3E-05 |
| MARKEY_RB1_CHRONIC_LOF_UP              | -0,23  | 2E-10 | 3E-09   | 3E-05 |
| SANSOM_APC_TARGETS                     | -0,186 | 3E-07 | 3E-09   | 3E-05 |
| BIOCARTA_ERK_PATHWAY                   | -0,212 | 5E-09 | 3,1E-09 | 3E-05 |
| TESAR_ALK_TARGETS_HUMAN_ES_4D_DN       | -0,182 | 6E-07 | 3,1E-09 | 3E-05 |
| MARTINEZ_TP53_TARGETS_DN               | -0,205 | 2E-08 | 3,5E-09 | 4E-05 |
| V\$AP2GAMMA_Q1                         | -0,188 | 2E-07 | 3,6E-09 | 4E-05 |
| BOYLAN_MULTIPLE_MYELOMA_C_D_UP         | -0,224 | 7E-10 | 3,6E-09 | 4E-05 |
| BAKER_HEMATOPOIESIS_STAT5_TARGETS      | -0,191 | 2E-07 | 3,6E-09 | 4E-05 |
| GTCNYYATGR_UNKNOWN                     | -0,153 | 3E-05 | 3,6E-09 | 4E-05 |
| GSE13485_DAY3_VS_DAY7_YF17D_VACCINI    | -0,088 | 0,016 | 3,7E-09 | 4E-05 |
| YAMAZAKI_TCEB3_TARGETS_DN              | -0,237 | 6E-11 | 3,8E-09 | 4E-05 |
| PID_TRKRPATHWAY                        | -0,157 | 2E-05 | 3,8E-09 | 4E-05 |
| V\$ER_Q6_Q2                            | -0,185 | 4E-07 | 3,9E-09 | 4E-05 |
| BYSTRYKH_HEMATOPOIESIS_STEM_CELL_FLI1  | -0,161 | 1E-05 | 4,3E-09 | 4E-05 |
| NUNODA_RESPONSE_TO_DASATINIB_IMATINIF  | -0,211 | 6E-09 | 4,3E-09 | 4E-05 |
| POMEROY_MEDULLOBLASTOMA_PROGNOSIS_I    | -0,166 | 5E-06 | 4,4E-09 | 4E-05 |
| HATADA_METHYLATED_IN_LUNG_CANCER_UI    | -0,147 | 6E-05 | 4,6E-09 | 5E-05 |
| SIG_REGULATION_OF_THE_ACTIN_CYTOSKELI  | -0,235 | 9E-11 | 4,7E-09 | 5E-05 |
| GSE27786_CD4_TCELL_VS_ERYTHROBLAST     | -0,132 | 3E-04 | 5E-09   | 5E-05 |
| GACAGGG,MIR-339                        | -0,107 | 0,003 | 5,2E-09 | 5E-05 |
| NEGATIVE_REGULATION_OF_CELL_DIFFERENT  | -0,146 | 7E-05 | 5,3E-09 | 5E-05 |
| GGGCGGR_V\$SP1_Q6                      | -0,169 | 3E-06 | 5,4E-09 | 5E-05 |

|                                      |        |       |         |        |
|--------------------------------------|--------|-------|---------|--------|
| MORF_WNT1                            | -0,152 | 3E-05 | 5,5E-09 | 6E-05  |
| V\$MYCMAX_01                         | -0,209 | 8E-09 | 5,5E-09 | 6E-05  |
| NIELSEN_SCHWANNOMA_DN                | -0,163 | 8E-06 | 5,5E-09 | 6E-05  |
| V\$MAZ_Q6                            | -0,154 | 3E-05 | 5,7E-09 | 6E-05  |
| RYTAAWNNNTGAY_UNKNOWN                | -0,152 | 3E-05 | 5,8E-09 | 6E-05  |
| IVANOVA_HEMATOPOIESIS_STEM_CELL_LONC | -0,135 | 2E-04 | 6E-09   | 6E-05  |
| CTGCAGY_UNKNOWN                      | -0,152 | 3E-05 | 6E-09   | 6E-05  |
| GSE15324_NAIVE_VS_ACTIVATED_CD8_TCE  | -0,178 | 1E-06 | 6,1E-09 | 6E-05  |
| ATGTCAC,MIR-489                      | -0,182 | 6E-07 | 6,1E-09 | 6E-05  |
| TRANSCRIPTION_DNA_DEPENDENT          | -0,184 | 5E-07 | 6,2E-09 | 6E-05  |
| REACTOME_SIGNALING_BY_NODAL          | -0,149 | 4E-05 | 6,2E-09 | 6E-05  |
| V\$VDR_Q3                            | -0,16  | 1E-05 | 6,4E-09 | 7E-05  |
| DORN_ADENOVIRUS_INFECTION_12HR_UP    | -0,183 | 5E-07 | 6,4E-09 | 7E-05  |
| HOELZEL_NF1_TARGETS_DN               | -0,157 | 2E-05 | 6,6E-09 | 7E-05  |
| GSE17721_CPG_VS_GARDIQUIMOD_0.5H_BM  | -0,194 | 1E-07 | 6,7E-09 | 7E-05  |
| RNA_BIOSYNTHETIC_PROCESS             | -0,184 | 4E-07 | 6,8E-09 | 7E-05  |
| REGULATION_OF_CHROMOSOME_ORGANIZATI  | -0,241 | 3E-11 | 7,1E-09 | 7E-05  |
| V\$MYCMAX_02                         | -0,211 | 6E-09 | 7,1E-09 | 7E-05  |
| OLSSON_E2F3_TARGETS_DN               | -0,231 | 2E-10 | 7,2E-09 | 7E-05  |
| FIGUEROA_AML_METHYLATION_CLUSTER_4_I | -0,202 | 3E-08 | 7,2E-09 | 7E-05  |
| POTASSIUM_ION_TRANSPORT              | -0,16  | 1E-05 | 7,4E-09 | 8E-05  |
| HEDENFALK_BREAST_CANCER_BRCA1_VS_BF  | -0,23  | 2E-10 | 7,5E-09 | 8E-05  |
| MASRI_RESISTANCE_TO_TAMOXIFEN_AND_AF | -0,045 | 0,216 | 7,6E-09 | 8E-05  |
| GSE17721_CTRL_VS_LPS_1H_BMDM_UP      | -0,148 | 5E-05 | 7,6E-09 | 8E-05  |
| KONDO_PROSTATE_CANCER_HCP_WITH_H3K   | -0,13  | 4E-04 | 7,9E-09 | 8E-05  |
| RIZKI_TUMOR_INVASIVENESS_2D_DN       | -0,207 | 1E-08 | 7,9E-09 | 8E-05  |
| V\$MIF1_01                           | -0,108 | 0,003 | 8,2E-09 | 8E-05  |
| GSE27786_LSK_VS_BCELL_UP             | -0,138 | 2E-04 | 8,2E-09 | 8E-05  |
| JEON_SMAD6_TARGETS_DN                | -0,225 | 5E-10 | 8,3E-09 | 8E-05  |
| INAMURA_LUNG_CANCER_SCC_UP           | -0,23  | 2E-10 | 8,4E-09 | 9E-05  |
| TISSUE_MORPHOGENESIS                 | -0,132 | 3E-04 | 8,5E-09 | 9E-05  |
| GSE29614_CTRL_VS_DAY3_TIV_FLU_VACCI  | -0,187 | 3E-07 | 8,6E-09 | 9E-05  |
| V\$GATA2_01                          | -0,132 | 3E-04 | 9E-09   | 9E-05  |
| SCHAEFFER_PROSTATE_DEVELOPMENT_12HR  | -0,208 | 1E-08 | 9E-09   | 9E-05  |
| PAL_PRMT5_TARGETS_UP                 | -0,219 | 1E-09 | 9,1E-09 | 9E-05  |
| V\$DR4_Q2                            | -0,161 | 1E-05 | 9,1E-09 | 9E-05  |
| BENPORATH_NANOG_TARGETS              | -0,223 | 8E-10 | 9,2E-09 | 9E-05  |
| SA_TRKA_RECEPTOR                     | -0,185 | 4E-07 | 9,5E-09 | 1E-04  |
| FIGUEROA_AML_METHYLATION_CLUSTER_7_I | -0,192 | 1E-07 | 9,8E-09 | 1E-04  |
| ZHAN_MULTIPLE_MYELOMA_SPIKED         | -0,177 | 1E-06 | 1E-08   | 0,0001 |
| GSE27786_LIN_NEG_VS_BCELL_UP         | -0,223 | 8E-10 | 1E-08   | 0,0001 |
| V\$STAT6_01                          | -0,181 | 7E-07 | 1E-08   | 0,0001 |

|                                       |        |       |         |        |
|---------------------------------------|--------|-------|---------|--------|
| HOLLEMAN_ASPARAGINASE_RESISTANCE_B_/  | -0,157 | 2E-05 | 1E-08   | 0,0001 |
| INTERPHASE                            | -0,206 | 1E-08 | 1E-08   | 0,0001 |
| SCHAEFFER_SOX9_TARGETS_IN_PROSTATE_I  | -0,22  | 1E-09 | 1,1E-08 | 0,0001 |
| NEGATIVE_REGULATION_OF_CELL_CYCLE     | -0,194 | 9E-08 | 1,1E-08 | 0,0001 |
| CCTGTGA,MIR-513                       | -0,154 | 2E-05 | 1,1E-08 | 0,0001 |
| V\$ZF5_01                             | -0,193 | 1E-07 | 1,1E-08 | 0,0001 |
| V\$LEF1_Q6                            | -0,168 | 4E-06 | 1,1E-08 | 0,0001 |
| KEGG_ACUTE_MYELOID_LEUKEMIA           | -0,174 | 2E-06 | 1,1E-08 | 0,0001 |
| RAF_UP.V1_DN                          | -0,049 | 0,184 | 1,2E-08 | 0,0001 |
| ENZYME_LINKED_RECEPTOR_PROTEIN_SIGNAL | -0,125 | 6E-04 | 1,2E-08 | 0,0001 |
| BHAT_ESR1_TARGETS_NOT_VIA_AKT1_UP     | -0,091 | 0,013 | 1,2E-08 | 0,0001 |
| MACROMOLECULAR_COMPLEX                | -0,217 | 2E-09 | 1,2E-08 | 0,0001 |
| REACTOME_SIGNALING_BY_ROBO_RECEPTOR   | -0,176 | 1E-06 | 1,2E-08 | 0,0001 |
| V\$ZIC2_01                            | -0,175 | 2E-06 | 1,2E-08 | 0,0001 |
| FARMER_BREAST_CANCER_BASAL_VS_LULMI   | -0,092 | 0,012 | 1,3E-08 | 0,0001 |
| KEGG_SMALL_CELL_LUNG_CANCER           | -0,205 | 2E-08 | 1,3E-08 | 0,0001 |
| TRANSMEMBRANE_RECEPTOR_PROTEIN_TYRO   | -0,129 | 4E-04 | 1,3E-08 | 0,0001 |
| V\$E12_Q6                             | -0,15  | 4E-05 | 1,3E-08 | 0,0001 |
| STOSSI_RESPONSE_TO ESTRADIOL          | -0,104 | 0,005 | 1,3E-08 | 0,0001 |
| INTERPHASE_OF_MITOTIC_CELL_CYCLE      | -0,199 | 4E-08 | 1,3E-08 | 0,0001 |
| REGULATION_OF_NUCLEOBASENUCLEOSIDENL  | -0,174 | 2E-06 | 1,3E-08 | 0,0001 |
| TRANSCRIPTION_FROM_RNA_POLYMERASE_II  | -0,19  | 2E-07 | 1,4E-08 | 0,0001 |
| POTASSIUM_CHANNEL_ACTIVITY            | -0,181 | 7E-07 | 1,4E-08 | 0,0001 |
| NEGATIVE_REGULATION_OF_RNA_METABOLIC  | -0,143 | 9E-05 | 1,4E-08 | 0,0001 |
| NEGATIVE_REGULATION_OF_TRANSCRIPTION_ | -0,143 | 9E-05 | 1,4E-08 | 0,0001 |
| ACEVEDO_FGFR1_TARGETS_IN_PROSTATE_C.  | -0,148 | 5E-05 | 1,5E-08 | 0,0001 |
| PID_HEDGEHOG_2PATHWAY                 | -0,147 | 5E-05 | 1,5E-08 | 0,0001 |
| GSE3982_EOSINOPHIL_VS_MAC_UP          | -0,149 | 5E-05 | 1,5E-08 | 0,0001 |
| BIOPOLYMER_METABOLIC_PROCESS          | -0,204 | 2E-08 | 1,5E-08 | 0,0001 |
| RYTGCNWTGGNR_UNKNOWN                  | -0,122 | 9E-04 | 1,5E-08 | 0,0002 |
| TRANSCRIPTION                         | -0,172 | 2E-06 | 1,5E-08 | 0,0002 |
| TURASHVILI_BREAST_LOBULAR_CARCINOMA_  | -0,154 | 2E-05 | 1,5E-08 | 0,0002 |
| V\$STAT5A_02                          | -0,134 | 2E-04 | 1,5E-08 | 0,0002 |
| chr18q12                              | -0,218 | 2E-09 | 1,6E-08 | 0,0002 |
| V\$RORA1_01                           | -0,159 | 1E-05 | 1,6E-08 | 0,0002 |
| BIOCARTA_NDKDYNAMIN_PATHWAY           | -0,203 | 2E-08 | 1,8E-08 | 0,0002 |
| GSE22886_NAIVE_VS_MEMORY_TCELL_UP     | -0,138 | 2E-04 | 1,8E-08 | 0,0002 |
| V\$P53_02                             | -0,159 | 1E-05 | 1,8E-08 | 0,0002 |
| V\$HEB_Q6                             | -0,156 | 2E-05 | 1,8E-08 | 0,0002 |
| CHEN_LVAD_SUPPORT_OF_FAILING_HEART_U  | -0,146 | 7E-05 | 1,8E-08 | 0,0002 |
| MYAATNNNNNNNGGC_UNKNOWN               | -0,207 | 1E-08 | 1,9E-08 | 0,0002 |
| V\$PAX8_B                             | -0,132 | 3E-04 | 1,9E-08 | 0,0002 |

|                                        |        |       |         |        |
|----------------------------------------|--------|-------|---------|--------|
| IVANOVA_HEMATOPOIESIS_EARLY_PROGENIT   | -0,212 | 5E-09 | 1,9E-08 | 0,0002 |
| V\$NGFIC_01                            | -0,179 | 9E-07 | 2E-08   | 0,0002 |
| REGULATION_OF_RNA_METABOLIC_PROCESS    | -0,162 | 9E-06 | 2E-08   | 0,0002 |
| GSE18791_CTRL_VS_NEWCASTLE_VIRUS_DC    | -0,143 | 9E-05 | 2,1E-08 | 0,0002 |
| V\$CREB_Q2_01                          | -0,187 | 3E-07 | 2,1E-08 | 0,0002 |
| CELLULAR_PROTEIN_COMPLEX_DISASSEMBLY   | -0,232 | 1E-10 | 2,2E-08 | 0,0002 |
| CCTGCTG,MIR-214                        | -0,14  | 1E-04 | 2,3E-08 | 0,0002 |
| REACTOME_APOPTOTIC_EXECUTION_PHASE     | -0,234 | 1E-10 | 2,3E-08 | 0,0002 |
| GCAAGGA,MIR-502                        | -0,176 | 1E-06 | 2,3E-08 | 0,0002 |
| REACTOME_IONOTROPIC_ACTIVITY_OF_KAINA/ | -0,116 | 0,002 | 2,3E-08 | 0,0002 |
| GSE14000_4H_VS_16H_LPS_DC_TRANSLAT     | -0,152 | 3E-05 | 2,3E-08 | 0,0002 |
| MARTINEZ_RB1_TARGETS_DN                | -0,183 | 5E-07 | 2,4E-08 | 0,0002 |
| CATTGTTY_V\$SOX9_B1                    | -0,19  | 2E-07 | 2,4E-08 | 0,0002 |
| DAZARD_RESPONSE_TO_UV_SCC_DN           | -0,197 | 6E-08 | 2,5E-08 | 0,0003 |
| REGULATION_OF_TRANSCRIPTIONDNA_DEPEN   | -0,157 | 2E-05 | 2,6E-08 | 0,0003 |
| V\$E2F1DP1_01                          | -0,206 | 1E-08 | 2,7E-08 | 0,0003 |
| V\$E2F1DP2_01                          | -0,206 | 1E-08 | 2,7E-08 | 0,0003 |
| V\$E2F4DP2_01                          | -0,206 | 1E-08 | 2,7E-08 | 0,0003 |
| GSE27786_NKTCELL_VS_ERYTHROBLAST_DN    | -0,132 | 3E-04 | 2,7E-08 | 0,0003 |
| ERB2_UP.V1_DN                          | -0,176 | 1E-06 | 2,7E-08 | 0,0003 |
| YRTCANNRCGC_UNKNOWN                    | -0,212 | 5E-09 | 2,7E-08 | 0,0003 |
| GSE27786_ERYTHROBLAST_VS_NEUTROPHIL    | -0,179 | 8E-07 | 2,7E-08 | 0,0003 |
| V\$E2F_Q3                              | -0,207 | 1E-08 | 2,7E-08 | 0,0003 |
| V\$YY1_Q6                              | -0,172 | 2E-06 | 2,8E-08 | 0,0003 |
| chr6p                                  | -0,213 | 5E-09 | 2,8E-08 | 0,0003 |
| PDGF_UP.V1_UP                          | -0,202 | 3E-08 | 2,8E-08 | 0,0003 |
| BROWNE_HCMV_INFECTION_24HR_UP          | -0,218 | 2E-09 | 2,9E-08 | 0,0003 |
| V\$E47_02                              | -0,134 | 2E-04 | 2,9E-08 | 0,0003 |
| AUNG_GASTRIC_CANCER                    | -0,213 | 4E-09 | 2,9E-08 | 0,0003 |
| GSE360_L_DONOVANI_VS_T_GONDII_DC_DN    | -0,218 | 2E-09 | 2,9E-08 | 0,0003 |
| MODULE_567                             | -0,223 | 8E-10 | 2,9E-08 | 0,0003 |
| MORF_EPHA7                             | -0,14  | 1E-04 | 3E-08   | 0,0003 |
| KEGG_GLIOMA                            | -0,214 | 3E-09 | 3E-08   | 0,0003 |
| SHEPARD_CRUSH_AND_BURN_MUTANT_DN       | -0,214 | 4E-09 | 3E-08   | 0,0003 |
| SGCGSSAAA_V\$E2F1DP2_01                | -0,201 | 3E-08 | 3E-08   | 0,0003 |
| NGUYEN_NOTCH1_TARGETS_DN               | -0,188 | 2E-07 | 3E-08   | 0,0003 |
| GSE26495_NAIVE_VS_PD1LOW_CD8_TCELL     | -0,133 | 3E-04 | 3E-08   | 0,0003 |
| V\$FOXO1_01                            | -0,152 | 3E-05 | 3,2E-08 | 0,0003 |
| OSADA_ASCL1_TARGETS_UP                 | -0,131 | 3E-04 | 3,2E-08 | 0,0003 |
| XU_GH1_AUTOCRINE_TARGETS_UP            | -0,139 | 1E-04 | 3,2E-08 | 0,0003 |
| CAGGTA_V\$AREB6_01                     | -0,151 | 3E-05 | 3,2E-08 | 0,0003 |
| MCBRYAN_PUBERTAL_BREAST_4_5WK_UP       | -0,188 | 2E-07 | 3,2E-08 | 0,0003 |

|                                       |        |       |         |        |
|---------------------------------------|--------|-------|---------|--------|
| DEVELOPMENTAL_MATURATION              | -0,119 | 0,001 | 3,3E-08 | 0,0003 |
| chr1p34                               | -0,201 | 3E-08 | 3,3E-08 | 0,0003 |
| CELL_MATURATION                       | -0,11  | 0,003 | 3,3E-08 | 0,0003 |
| HOLLEMAN_VINCRIStINE_RESISTANCE_ALL_U | -0,218 | 2E-09 | 3,4E-08 | 0,0003 |
| NEGATIVE_REGULATION_OF_METABOLIC_PRO  | -0,16  | 1E-05 | 3,4E-08 | 0,0003 |
| V\$ATF3_Q6                            | -0,159 | 1E-05 | 3,5E-08 | 0,0003 |
| REGULATION_OF_TRANSCRIPTION           | -0,152 | 3E-05 | 3,5E-08 | 0,0004 |
| GSE1460_INTRATHYMIC_T_PROGENITOR_VS_  | -0,215 | 3E-09 | 3,5E-08 | 0,0004 |
| RNGTGGGC_UNKNOWN                      | -0,162 | 9E-06 | 3,5E-08 | 0,0004 |
| BROWNE_HCMV_INFECTION_2HR_DN          | -0,226 | 4E-10 | 3,6E-08 | 0,0004 |
| GSE29618_PRE_VS_DAY7_POST_TIV_FLU_V   | -0,147 | 6E-05 | 3,6E-08 | 0,0004 |
| LIM_MAMMARY_STEM_CELL_UP              | -0,165 | 6E-06 | 3,6E-08 | 0,0004 |
| HOLLEMAN_ASPARAGINASE_RESISTANCE_ALI  | -0,173 | 2E-06 | 3,7E-08 | 0,0004 |
| MODULE_201                            | -0,136 | 2E-04 | 3,8E-08 | 0,0004 |
| TESAR_ALK_TARGETS_HUMAN_ES_5D_DN      | -0,177 | 1E-06 | 3,8E-08 | 0,0004 |
| GSE339_CD8POS_VS_CD4CD8DN_DC_IN_CUI   | -0,212 | 5E-09 | 3,8E-08 | 0,0004 |
| ZEMBUTSU_SENSITIVITY_TO_NIMUSTINE     | -0,196 | 7E-08 | 3,8E-08 | 0,0004 |
| BRUINS_UVC_RESPONSE_VIA_TP53_GROUP_C  | -0,151 | 3E-05 | 3,9E-08 | 0,0004 |
| YTAAYNGCT_UNKNOWN                     | -0,169 | 3E-06 | 3,9E-08 | 0,0004 |
| NEGATIVE_REGULATION_OF_CELLULAR_MET/  | -0,164 | 7E-06 | 3,9E-08 | 0,0004 |
| V\$CREBP1CJUN_01                      | -0,181 | 6E-07 | 3,9E-08 | 0,0004 |
| KEGG_NEUROTROPHIN_SIGNALING_PATHWAY   | -0,175 | 2E-06 | 4E-08   | 0,0004 |
| YGCGYRCGC_UNKNOWN                     | -0,163 | 8E-06 | 4E-08   | 0,0004 |
| GRADE_COLON_VS_RECTAL_CANCER_DN       | -0,18  | 8E-07 | 4E-08   | 0,0004 |
| V\$SMAD4_Q6                           | -0,173 | 2E-06 | 4E-08   | 0,0004 |
| GSE1460_INTRATHYMIC_T_PROGENITOR_VS_  | -0,184 | 4E-07 | 4,1E-08 | 0,0004 |
| REACTOME_SIGNALING_BY_NOTCH1          | -0,176 | 1E-06 | 4,2E-08 | 0,0004 |
| GSE18148_CFBF_KO_VS_WT_TREG_DN        | -0,135 | 2E-04 | 4,2E-08 | 0,0004 |
| VOLTAGE_GATED_POTASSIUM_CHANNEL_CO    | -0,172 | 2E-06 | 4,2E-08 | 0,0004 |
| MIKKELSEN_MCV6_ICP_WITH_H3K4ME3_AND   | -0,158 | 1E-05 | 4,3E-08 | 0,0004 |
| REACTOME_DOWNREGULATION_OF_ERBB2_EI   | -0,186 | 3E-07 | 4,3E-08 | 0,0004 |
| CCTNTMAGA_UNKNOWN                     | -0,143 | 9E-05 | 4,3E-08 | 0,0004 |
| GSE17721_PAM3CSK4_VS_CPG_0.5H_BMDM    | -0,14  | 1E-04 | 4,3E-08 | 0,0004 |
| GSE14308_INDUCED_VS_NATURAL_TREG_UP   | -0,2   | 4E-08 | 4,4E-08 | 0,0004 |
| DELPUECH_FOXO3_TARGETS_DN             | -0,19  | 2E-07 | 4,4E-08 | 0,0004 |
| chr7q                                 | -0,188 | 3E-07 | 4,4E-08 | 0,0004 |
| YTAATTA_V\$LHX3_01                    | -0,16  | 1E-05 | 4,5E-08 | 0,0004 |
| V\$E2F1_Q3                            | -0,207 | 1E-08 | 4,5E-08 | 0,0005 |
| REACTOME_CELL_CELL_COMMUNICATION      | -0,207 | 1E-08 | 4,6E-08 | 0,0005 |
| MARKEY_RB1_ACUTE_LOF_DN               | -0,195 | 8E-08 | 4,6E-08 | 0,0005 |
| BEGUM_TARGETS_OF_PAX3_FOXO1_FUSION_   | -0,189 | 2E-07 | 4,6E-08 | 0,0005 |
| V\$CREB_Q4_01                         | -0,176 | 1E-06 | 4,6E-08 | 0,0005 |



|                                       |        |       |         |        |
|---------------------------------------|--------|-------|---------|--------|
| AAGCAAT,MIR-137                       | -0,146 | 6E-05 | 4,7E-08 | 0,0005 |
| V\$SP1_Q6                             | -0,159 | 1E-05 | 4,8E-08 | 0,0005 |
| V\$SF1_Q6                             | -0,184 | 4E-07 | 4,8E-08 | 0,0005 |
| BIOCARTA_G1_PATHWAY                   | -0,215 | 3E-09 | 4,8E-08 | 0,0005 |
| DNA_REPLICATION                       | -0,197 | 6E-08 | 4,9E-08 | 0,0005 |
| GAUSSMANN_MLL_AF4_FUSION_TARGETS_G    | -0,137 | 2E-04 | 4,9E-08 | 0,0005 |
| PID_TAP63PATHWAY                      | -0,194 | 1E-07 | 5E-08   | 0,0005 |
| V\$E2F1_Q6                            | -0,207 | 1E-08 | 5,1E-08 | 0,0005 |
| GSE29618_PRE_VS_DAY7_POST_TIV_FLU_V   | -0,167 | 5E-06 | 5,1E-08 | 0,0005 |
| DNA_BINDING                           | -0,178 | 1E-06 | 5,1E-08 | 0,0005 |
| MEISSNER_BRAIN_HCP_WITH_H3K4ME2       | -0,187 | 3E-07 | 5,2E-08 | 0,0005 |
| GALLUZZI_PERMEABILIZE_MITOCHONDRIA    | -0,193 | 1E-07 | 5,3E-08 | 0,0005 |
| GSE29618_PRE_VS_DAY7_POST_LAIV_FLU_V  | -0,151 | 4E-05 | 5,4E-08 | 0,0005 |
| CROONQUIST_NRAS_VS_STROMAL_STIMULAT   | -0,202 | 3E-08 | 5,5E-08 | 0,0005 |
| LI_WILMS_TUMOR_VS_FETAL_KIDNEY_2_UP   | -0,18  | 8E-07 | 5,6E-08 | 0,0006 |
| ZHAN_MULTIPLE_MYELOMA_MS_UP           | -0,122 | 9E-04 | 5,6E-08 | 0,0006 |
| AMBROSINI_FLAVOPIRIDOL_TREATMENT_TP53 | -0,15  | 4E-05 | 5,7E-08 | 0,0006 |
| MODULE_69                             | -0,15  | 4E-05 | 5,7E-08 | 0,0006 |
| V\$E2F_02                             | -0,202 | 3E-08 | 5,7E-08 | 0,0006 |
| V\$VDR_Q6                             | -0,137 | 2E-04 | 5,8E-08 | 0,0006 |
| MODULE_154                            | -0,203 | 2E-08 | 5,8E-08 | 0,0006 |
| DING_LUNG_CANCER_BY_MUTATION_RATE     | -0,12  | 0,001 | 5,9E-08 | 0,0006 |
| TGACGTCA_V\$ATF3_Q6                   | -0,185 | 4E-07 | 5,9E-08 | 0,0006 |
| LIM_MAMMARY_LUMINAL_MATURE_DN         | -0,184 | 4E-07 | 6E-08   | 0,0006 |
| V\$POU3F2_01                          | -0,171 | 3E-06 | 6E-08   | 0,0006 |
| BENPORATH_ES_CORE_NINE_CORRELATED     | -0,175 | 2E-06 | 6,1E-08 | 0,0006 |
| V\$ALPHACP1_01                        | -0,18  | 8E-07 | 6,3E-08 | 0,0006 |
| CSR_LATE_UP.V1_UP                     | -0,209 | 8E-09 | 6,4E-08 | 0,0006 |
| GCANCTGNY_V\$MYOD_Q6                  | -0,138 | 2E-04 | 6,4E-08 | 0,0006 |
| GSE360_L_MAJOR_VS_B_MALAYI_LOW_DOS    | -0,193 | 1E-07 | 6,4E-08 | 0,0006 |
| V\$OCT_C                              | -0,167 | 5E-06 | 6,4E-08 | 0,0006 |
| PASTURAL_RIZ1_TARGETS_DN              | -0,163 | 8E-06 | 6,5E-08 | 0,0006 |
| ORGANELLE_PART                        | -0,218 | 2E-09 | 6,5E-08 | 0,0006 |
| PDGF_ERK_DN.V1_DN                     | -0,151 | 4E-05 | 6,6E-08 | 0,0007 |
| REGULATION_OF_GENE_EXPRESSION_EPIGENE | -0,192 | 1E-07 | 6,8E-08 | 0,0007 |
| GSE14308_TH1_VS_NAIVE_CD4_TCELL_DN    | -0,158 | 1E-05 | 6,8E-08 | 0,0007 |
| GNF2_HDAC1                            | -0,208 | 1E-08 | 7,1E-08 | 0,0007 |
| VETTER_TARGETS_OF_PRKCA_AND_ETS1_UF   | -0,219 | 1E-09 | 7,2E-08 | 0,0007 |
| GSE17721_LPS_VS_PAM3CSK4_2H_BMDM_L    | -0,176 | 1E-06 | 7,3E-08 | 0,0007 |
| TGCGCANK_UNKNOWN                      | -0,174 | 2E-06 | 7,5E-08 | 0,0007 |
| MODULE_316                            | -0,154 | 2E-05 | 7,5E-08 | 0,0007 |
| MODULE_72                             | -0,221 | 1E-09 | 7,7E-08 | 0,0008 |

|                                      |        |       |         |        |
|--------------------------------------|--------|-------|---------|--------|
| MODULE_105                           | -0,217 | 2E-09 | 7,8E-08 | 0,0008 |
| YAGI_AML_WITH_INV_16_TRANSLOCATION   | -0,167 | 5E-06 | 7,9E-08 | 0,0008 |
| V\$LHX3_01                           | -0,151 | 4E-05 | 8E-08   | 0,0008 |
| V\$E2A_Q2                            | -0,163 | 8E-06 | 8,3E-08 | 0,0008 |
| V\$RFX1_02                           | -0,104 | 0,004 | 8,3E-08 | 0,0008 |
| DAVICIONI_PAX_FOXO1_SIGNATURE_IN_ARM | -0,198 | 5E-08 | 8,4E-08 | 0,0008 |
| V\$GRE_C                             | -0,161 | 1E-05 | 8,4E-08 | 0,0008 |
| KAECH_NAIVE_VS_DAY8_EFF_CD8_TCELL_U  | -0,14  | 1E-04 | 8,5E-08 | 0,0008 |
| V\$IK3_01                            | -0,129 | 4E-04 | 8,6E-08 | 0,0009 |
| GAZDA_DIAMOND_BLACKFAN_ANEMIA_ERYTH  | -0,14  | 1E-04 | 8,7E-08 | 0,0009 |
| V\$E2F1_Q3_01                        | -0,191 | 2E-07 | 8,9E-08 | 0,0009 |
| INTRACELLULAR_ORGANELLE_PART         | -0,216 | 3E-09 | 9E-08   | 0,0009 |
| REACTOME_SMAD2_SMAD3_SMAD4_HETERO    | -0,2   | 4E-08 | 9E-08   | 0,0009 |
| WANG_CISPLATIN_RESPONSE_AND_XPC_UP   | -0,196 | 7E-08 | 9,2E-08 | 0,0009 |
| V\$TCF1P_Q6                          | -0,182 | 5E-07 | 9,3E-08 | 0,0009 |
| V\$ATF_B                             | -0,176 | 1E-06 | 9,3E-08 | 0,0009 |
| GSE29618_LAIV_VS_TIV_FLU_VACCINE_DAY | -0,175 | 2E-06 | 9,3E-08 | 0,0009 |
| MODULE_329                           | -0,132 | 3E-04 | 9,3E-08 | 0,0009 |
| KAAB_HEART_ATRIUM_VS_VENTRICLE_UP    | -0,136 | 2E-04 | 9,6E-08 | 0,001  |
| MONOVALENT_INORGANIC_CATION_TRANSPC  | -0,122 | 8E-04 | 9,7E-08 | 0,001  |
| MODULE_387                           | -0,136 | 2E-04 | 9,8E-08 | 0,001  |
| ASGHARZADEH_NEUROBLASTOMA_POOR_SUF   | -0,154 | 2E-05 | 9,8E-08 | 0,001  |
| CERVERA_SDHB_TARGETS_2               | -0,158 | 2E-05 | 9,8E-08 | 0,001  |
| INORGANIC_ANION_TRANSMEMBRANE_TRANS  | -0,187 | 3E-07 | 9,8E-08 | 0,001  |
| GSE29618_PRE_VS_DAY7_POST_LAIV_FLU_  | -0,144 | 8E-05 | 9,9E-08 | 0,001  |
| GSE26495_NAIVE_VS_PD1HIGH_CD8_TCELL_ | -0,112 | 0,002 | 9,9E-08 | 0,001  |
| V\$USF_C                             | -0,189 | 2E-07 | 9,9E-08 | 0,001  |
| MODULE_197                           | -0,196 | 7E-08 | 1E-07   | 0,001  |
| GSE10239_NAIVE_VS_DAY4.5_EFF_CD8_TCI | -0,129 | 4E-04 | 1E-07   | 0,001  |
| GSE17721_LPS_VS_CPG_0.5H_BMDM_UP     | -0,146 | 6E-05 | 1E-07   | 0,001  |
| SETLUR_PROSTATE_CANCER_TMPRS2_ERG_   | -0,165 | 6E-06 | 1,1E-07 | 0,0011 |
| GSE24634_NAIVE_CD4_TCELL_VS_DAY10_II | -0,126 | 6E-04 | 1,1E-07 | 0,0011 |
| V\$MEIS1BHOXA9_01                    | -0,18  | 8E-07 | 1,1E-07 | 0,0011 |
| GLI1_UP.V1_UP                        | -0,135 | 2E-04 | 1,1E-07 | 0,0011 |
| ZIRN_TRETINOIN_RESPONSE_WT1_UP       | -0,175 | 2E-06 | 1,1E-07 | 0,0011 |
| V\$AP2_Q6                            | -0,159 | 1E-05 | 1,1E-07 | 0,0011 |
| PTEN_DN.V1_UP                        | -0,156 | 2E-05 | 1,1E-07 | 0,0011 |
| GSE13485_CTRL_VS_DAY7_YF17D_VACCINE  | -0,175 | 1E-06 | 1,1E-07 | 0,0011 |
| GSE19825_NAIVE_VS_IL2RAHIGH_DAY3_EFF | -0,134 | 2E-04 | 1,1E-07 | 0,0011 |
| V\$AP3_Q6                            | -0,163 | 8E-06 | 1,1E-07 | 0,0011 |
| MIKKELSEN_NPC_ICP_WITH_H3K4ME3       | -0,131 | 4E-04 | 1,1E-07 | 0,0011 |
| chr18q11                             | -0,176 | 1E-06 | 1,1E-07 | 0,0011 |

|                                      |        |       |         |        |
|--------------------------------------|--------|-------|---------|--------|
| GSE9650_NAIVE_VS_EFF_CD8_TCELL_UP    | -0,151 | 4E-05 | 1,1E-07 | 0,0011 |
| AKT_UP_MTOR_DN.V1_DN                 | -0,156 | 2E-05 | 1,1E-07 | 0,0011 |
| V\$FREAC3_01                         | -0,153 | 3E-05 | 1,1E-07 | 0,0011 |
| FOURNIER_ACINAR_DEVELOPMENT_LATE_UP  | -0,186 | 3E-07 | 1,2E-07 | 0,0011 |
| GSE36476_YOUNG_VS_OLD_DONOR_MEMOR    | -0,163 | 7E-06 | 1,2E-07 | 0,0012 |
| CAGGTG_V\$E12_Q6                     | -0,143 | 9E-05 | 1,2E-07 | 0,0012 |
| MEIOTIC_CELL_CYCLE                   | -0,204 | 2E-08 | 1,2E-07 | 0,0012 |
| V\$CREBP1_01                         | -0,158 | 1E-05 | 1,2E-07 | 0,0012 |
| JAATINEN_HEMATOPOIETIC_STEM_CELL_UP  | -0,17  | 3E-06 | 1,2E-07 | 0,0012 |
| GSE9006_TYPE_1_DIABETES_AT_DX_VS_1M  | -0,133 | 3E-04 | 1,2E-07 | 0,0012 |
| COLDREN_GEFITINIB_RESISTANCE_UP      | -0,208 | 1E-08 | 1,2E-07 | 0,0012 |
| TGTYNNNNRGCARM_UNKNOWN               | -0,09  | 0,014 | 1,2E-07 | 0,0012 |
| PID_P75NTRPATHWAY                    | -0,159 | 1E-05 | 1,2E-07 | 0,0012 |
| TURASHVILI_BREAST_DUCTAL_CARCINOMA_\ | -0,159 | 1E-05 | 1,2E-07 | 0,0012 |
| RICKMAN_TUMOR_DIFFERENTIATED_WELL_VS | -0,171 | 3E-06 | 1,2E-07 | 0,0012 |
| GSE17721_CTRL_VS_PAM3CSK4_0.5H_BMDI  | -0,17  | 3E-06 | 1,3E-07 | 0,0012 |
| V\$CREB_01                           | -0,179 | 8E-07 | 1,3E-07 | 0,0013 |
| ORGANELLE_ORGANIZATION_AND_BIOGENESI | -0,191 | 2E-07 | 1,3E-07 | 0,0013 |
| CACCAGC,MIR-138                      | -0,163 | 8E-06 | 1,3E-07 | 0,0013 |
| MULLIGHAN_MLL_SIGNATURE_2_DN         | -0,16  | 1E-05 | 1,3E-07 | 0,0013 |
| V\$FOXMI_01                          | -0,169 | 4E-06 | 1,3E-07 | 0,0013 |
| MODULE_136                           | -0,153 | 3E-05 | 1,3E-07 | 0,0013 |
| YCATTAA_UNKNOWN                      | -0,143 | 9E-05 | 1,3E-07 | 0,0013 |
| GSE17721_CTRL_VS_CPG_6H_BMDM_DN      | -0,192 | 1E-07 | 1,3E-07 | 0,0013 |
| GSE1460_NAIVE_CD4_TCELL_CORD_BLOOD_  | -0,154 | 2E-05 | 1,3E-07 | 0,0013 |
| V\$FREAC7_01                         | -0,163 | 7E-06 | 1,4E-07 | 0,0013 |
| GSE11924_TFH_VS_TH2_CD4_TCELL_DN     | -0,198 | 5E-08 | 1,4E-07 | 0,0014 |
| GSE29618_LAIV_VS_TIV_FLU_VACCINE_DAY | -0,166 | 5E-06 | 1,4E-07 | 0,0014 |
| GSE15324_ELF4_KO_VS_WT_NAIVE_CD8_TI  | -0,149 | 4E-05 | 1,4E-07 | 0,0014 |
| GGGAGGRR_V\$MAZ_Q6                   | -0,143 | 9E-05 | 1,4E-07 | 0,0014 |
| V\$MYOD_Q6_01                        | -0,156 | 2E-05 | 1,4E-07 | 0,0014 |
| E2F1_UP.V1_UP                        | -0,194 | 1E-07 | 1,4E-07 | 0,0014 |
| CTTTGT_V\$LEF1_Q2                    | -0,165 | 6E-06 | 1,4E-07 | 0,0014 |
| NOTCH_DN.V1_UP                       | -0,163 | 8E-06 | 1,4E-07 | 0,0014 |
| GSE3982_MAC_VS_TH2_DN                | -0,189 | 2E-07 | 1,4E-07 | 0,0014 |
| TGAYRTCA_V\$ATF3_Q6                  | -0,16  | 1E-05 | 1,4E-07 | 0,0014 |
| V\$YY1_02                            | -0,123 | 8E-04 | 1,4E-07 | 0,0014 |
| NF_KAPPAB_BINDING                    | -0,201 | 3E-08 | 1,5E-07 | 0,0014 |
| GSE29618_LAIV_VS_TIV_FLU_VACCINE_DAY | -0,181 | 7E-07 | 1,5E-07 | 0,0015 |
| V\$ERR1_Q2                           | -0,182 | 6E-07 | 1,5E-07 | 0,0015 |
| TAYLOR_METHYLATED_IN_ACUTE_LYMPHOBL  | -0,19  | 2E-07 | 1,5E-07 | 0,0015 |
| GTRYCATRR_UNKNOWN                    | -0,093 | 0,011 | 1,5E-07 | 0,0015 |

|                                     |        |       |         |        |
|-------------------------------------|--------|-------|---------|--------|
| WILCOX_PRESPONSE_TO_ROGESTERONE_UP  | -0,214 | 4E-09 | 1,5E-07 | 0,0015 |
| V\$SP1_Q2_01                        | -0,138 | 2E-04 | 1,5E-07 | 0,0015 |
| CAAGGAT,MIR-362                     | -0,149 | 4E-05 | 1,6E-07 | 0,0015 |
| V\$AP4_Q6                           | -0,148 | 5E-05 | 1,6E-07 | 0,0015 |
| LEE_AGING_CEREBELLUM_DN             | -0,17  | 3E-06 | 1,6E-07 | 0,0016 |
| DAVICIONI_MOLECULAR_ARMS_VS_ERMS_UP | -0,147 | 5E-05 | 1,6E-07 | 0,0016 |
| GSE14769_UNSTIM_VS_40MIN_LPS_BMDM_L | -0,145 | 7E-05 | 1,6E-07 | 0,0016 |
| ALFANO_MYC_TARGETS                  | -0,196 | 7E-08 | 1,6E-07 | 0,0016 |
| GSE14308_TH1_VS_TH17_UP             | -0,201 | 3E-08 | 1,6E-07 | 0,0016 |
| GALIE_TUMOR_STEMNESS_GENES          | -0,176 | 1E-06 | 1,6E-07 | 0,0016 |
| MODY_HIPPOCAMPUS_NEONATAL           | -0,23  | 2E-10 | 1,6E-07 | 0,0016 |
| BROWNE_HCMV_INFECTION_4HR_DN        | -0,166 | 6E-06 | 1,7E-07 | 0,0016 |
| GSE11924_TFH_VS_TH1_CD4_TCELL_DN    | -0,15  | 4E-05 | 1,7E-07 | 0,0017 |
| MODULE_357                          | -0,198 | 5E-08 | 1,7E-07 | 0,0017 |
| V\$MYCMAX_B                         | -0,172 | 2E-06 | 1,7E-07 | 0,0017 |
| CTCTAGA,MIR-526C,MIR-518F,MIR-526A  | -0,155 | 2E-05 | 1,7E-07 | 0,0017 |
| TSENG_ADIPOGENIC_POTENTIAL_UP       | -0,177 | 1E-06 | 1,7E-07 | 0,0017 |
| V\$NKX62_Q2                         | -0,15  | 4E-05 | 1,7E-07 | 0,0017 |
| YAO_TEMPORAL_RESPONSE_TO_PROGESTERC | -0,17  | 3E-06 | 1,7E-07 | 0,0017 |
| MULLIGHAN_MLL_SIGNATURE_1_DN        | -0,142 | 1E-04 | 1,7E-07 | 0,0017 |
| WHITFIELD_CELL_CYCLE_G2             | -0,187 | 3E-07 | 1,7E-07 | 0,0017 |
| V\$NKX61_01                         | -0,156 | 2E-05 | 1,8E-07 | 0,0017 |
| DORN_ADOXVIRUS_INFECTION_32HR_DN    | -0,165 | 6E-06 | 1,8E-07 | 0,0017 |
| WANG_IMMORTALIZED_BY_HOXA9_AND_MEIS | -0,13  | 4E-04 | 1,8E-07 | 0,0017 |
| KATSANOUELAVL1_TARGETS_DN           | -0,193 | 1E-07 | 1,8E-07 | 0,0017 |
| GSE17721_CPG_VS_GARDIQUIMOD_2H_BMDM | -0,181 | 7E-07 | 1,8E-07 | 0,0018 |
| HUI_MAPK14_TARGETS_UP               | -0,158 | 1E-05 | 1,8E-07 | 0,0018 |
| SYATTGTG_UNKNOWN                    | -0,152 | 3E-05 | 1,8E-07 | 0,0018 |
| DNA_DEPENDENT_DNA_REPLICATION       | -0,192 | 1E-07 | 1,8E-07 | 0,0018 |
| POOLA_INVASIVE_BREAST_CANCER_DN     | -0,058 | 0,116 | 1,9E-07 | 0,0018 |
| V\$CREBP1_Q2                        | -0,155 | 2E-05 | 1,9E-07 | 0,0018 |
| CCAGGGG,MIR-331                     | -0,149 | 4E-05 | 1,9E-07 | 0,0018 |
| MODULE_297                          | -0,197 | 6E-08 | 1,9E-07 | 0,0019 |
| CCAWYNNGAAR_UNKNOWN                 | -0,202 | 3E-08 | 1,9E-07 | 0,0019 |
| REGULATION_OF_GENE_EXPRESSION       | -0,15  | 4E-05 | 1,9E-07 | 0,0019 |
| GATTGGY_V\$NFY_Q6_01                | -0,187 | 3E-07 | 1,9E-07 | 0,0019 |
| ESC_J1_UP_LATE.V1_DN                | -0,159 | 1E-05 | 1,9E-07 | 0,0019 |
| GSE12366_GC_VS_MEMORY_BCELL_UP      | -0,2   | 4E-08 | 1,9E-07 | 0,0019 |
| REGULATION_OF_CELLULAR_COMPONENT_OF | -0,148 | 5E-05 | 2E-07   | 0,0019 |
| REACTOME_SIGNALING_BY_NOTCH         | -0,162 | 9E-06 | 2E-07   | 0,0019 |
| V\$CHX10_01                         | -0,145 | 7E-05 | 2E-07   | 0,0019 |
| KORKOLA_YOLK_SAC_TUMOR              | -0,13  | 4E-04 | 2E-07   | 0,002  |

|                                       |        |       |         |        |
|---------------------------------------|--------|-------|---------|--------|
| GAGCCAG,MIR-149                       | -0,154 | 2E-05 | 2E-07   | 0,002  |
| GSE15930_STIM_VS_STIM_AND_TRICHOSTA1  | -0,14  | 1E-04 | 2E-07   | 0,002  |
| V\$CP2_01                             | -0,148 | 5E-05 | 2E-07   | 0,002  |
| HERNANDEZ_MITOTIC_ARREST_BY_DOCETAXI  | -0,21  | 8E-09 | 2E-07   | 0,002  |
| PID_INTEGRIN4_PATHWAY                 | -0,175 | 2E-06 | 2,1E-07 | 0,0021 |
| MITOTIC_CELL_CYCLE                    | -0,184 | 4E-07 | 2,1E-07 | 0,0021 |
| AGTTCTC,MIR-146A,MIR-146B             | -0,156 | 2E-05 | 2,1E-07 | 0,0021 |
| DELAYED_RECTIFIER_POTASSIUM_CHANNEL_7 | -0,153 | 3E-05 | 2,1E-07 | 0,0021 |
| GSE26928_CENTR_MEMORY_VS_CXCR5_POS    | -0,144 | 8E-05 | 2,2E-07 | 0,0021 |
| MORF_LCAT                             | -0,144 | 8E-05 | 2,2E-07 | 0,0021 |
| V\$ZID_01                             | -0,166 | 5E-06 | 2,2E-07 | 0,0022 |
| GSE9988_LPS_VS_LOW_LPS_MONOCYTE_UP    | -0,14  | 1E-04 | 2,2E-07 | 0,0022 |
| chr17q24                              | -0,093 | 0,011 | 2,2E-07 | 0,0022 |
| GSE360_DC_VS_MAC_L_MAJOR_DN           | -0,153 | 3E-05 | 2,3E-07 | 0,0022 |
| V\$PAX6_01                            | -0,168 | 4E-06 | 2,3E-07 | 0,0022 |
| V\$CMYB_01                            | -0,126 | 6E-04 | 2,3E-07 | 0,0022 |
| MCCLUNG_COCAINE_REWARD_5D             | -0,128 | 5E-04 | 2,3E-07 | 0,0022 |
| VANASSE_BCL2_TARGETS_UP               | -0,165 | 6E-06 | 2,3E-07 | 0,0023 |
| MCCLUNG_DELTA_FOSB_TARGETS_2WK        | -0,182 | 6E-07 | 2,3E-07 | 0,0023 |
| GSE19825_NAIVE_VS_IL2RALOW_DAY3_EFF   | -0,15  | 4E-05 | 2,3E-07 | 0,0023 |
| CAIRO_LIVER_DEVELOPMENT_UP            | -0,166 | 5E-06 | 2,3E-07 | 0,0023 |
| GSE360_L_MAJOR_VS_T_GONDII_MAC_DN     | -0,206 | 1E-08 | 2,3E-07 | 0,0023 |
| REGULATION_OF_AXONOGENESIS            | -0,119 | 0,001 | 2,3E-07 | 0,0023 |
| GSE27786_LIN_NEG_VS_MONO_MAC_UP       | -0,205 | 2E-08 | 2,3E-07 | 0,0023 |
| GSE27786_NKCELL_VS_NEUTROPHIL_DN      | -0,104 | 0,004 | 2,3E-07 | 0,0023 |
| GGGYGTGNY_UNKNOWN                     | -0,15  | 4E-05 | 2,3E-07 | 0,0023 |
| REACTOME_MYOGENESIS                   | -0,193 | 1E-07 | 2,4E-07 | 0,0023 |
| V\$E2F1_Q6_01                         | -0,193 | 1E-07 | 2,4E-07 | 0,0023 |
| GSE14350_TREG_VS_TEFF_IN_IL2RB_KO_DN  | -0,198 | 5E-08 | 2,4E-07 | 0,0023 |
| MODULE_458                            | -0,151 | 3E-05 | 2,4E-07 | 0,0023 |
| BIOCARTA_AGR_PATHWAY                  | -0,193 | 1E-07 | 2,4E-07 | 0,0024 |
| CAGNWMCNNGAC_UNKNOWN                  | -0,181 | 6E-07 | 2,4E-07 | 0,0024 |
| PRC2_EDD_UP.V1_UP                     | -0,19  | 2E-07 | 2,5E-07 | 0,0024 |
| GSE20366_EX_VIVO_VS_HOMEOSTATIC_CON   | -0,191 | 2E-07 | 2,5E-07 | 0,0024 |
| V\$EGR3_01                            | -0,196 | 7E-08 | 2,5E-07 | 0,0024 |
| RICKMAN_HEAD_AND_NECK_CANCER_A        | -0,182 | 5E-07 | 2,5E-07 | 0,0024 |
| chr15q26                              | -0,182 | 6E-07 | 2,5E-07 | 0,0025 |
| GSE3982_EOSINOPHIL_VS_BCELL_DN        | -0,207 | 1E-08 | 2,6E-07 | 0,0025 |
| BREUHAHN_GROWTH_FACTOR_SIGNALING_IN   | -0,113 | 0,002 | 2,6E-07 | 0,0025 |
| GARGALOVIC_RESPONSE_TO_OXIDIZED_PHOS  | -0,207 | 1E-08 | 2,6E-07 | 0,0025 |
| PROTEIN_COMPLEX                       | -0,189 | 2E-07 | 2,6E-07 | 0,0025 |
| LIU_PROSTATE_CANCER_DN                | -0,144 | 8E-05 | 2,6E-07 | 0,0025 |

|                                       |        |       |         |        |
|---------------------------------------|--------|-------|---------|--------|
| GSE29618_PRE_VS_DAY7_FLU_VACCINE_MC   | -0,156 | 2E-05 | 2,6E-07 | 0,0026 |
| SEQUENCE_SPECIFIC_DNA_BINDING         | -0,173 | 2E-06 | 2,6E-07 | 0,0026 |
| BHAT_ESR1_TARGETS_VIA_AKT1_UP         | -0,089 | 0,015 | 2,7E-07 | 0,0026 |
| KORKOLA_EMBRYONIC_CARCINOMA_VS_SEMI   | -0,186 | 3E-07 | 2,7E-07 | 0,0026 |
| KEGG_GAP_JUNCTION                     | -0,157 | 2E-05 | 2,8E-07 | 0,0027 |
| CELL_CYCLE_PHASE                      | -0,183 | 5E-07 | 2,8E-07 | 0,0027 |
| SANSOM_APC_TARGETS_UP                 | -0,148 | 5E-05 | 2,8E-07 | 0,0027 |
| GSE6269_FLU_VS_E_COLI_INF_PBMC_DN     | -0,152 | 3E-05 | 2,8E-07 | 0,0028 |
| CCATCCA,MIR-432                       | -0,148 | 5E-05 | 2,8E-07 | 0,0028 |
| KEGG_CHRONIC_MYELOID_LEUKEMIA         | -0,179 | 9E-07 | 2,8E-07 | 0,0028 |
| FIGUEROA_AML_METHYLATION_CLUSTER_1_I  | -0,156 | 2E-05 | 2,8E-07 | 0,0028 |
| V\$GATA1_01                           | -0,177 | 1E-06 | 2,9E-07 | 0,0028 |
| GSE7460_CTRL_VS_TGFB_TREATED_ACT_CI   | -0,176 | 1E-06 | 2,9E-07 | 0,0028 |
| V\$FOXO4_01                           | -0,145 | 7E-05 | 2,9E-07 | 0,0028 |
| REACTOME_TGF_BETA_RECEPTOR_SIGNALING  | -0,21  | 7E-09 | 2,9E-07 | 0,0028 |
| GGCNRNWCTTYS_UNKNOWN                  | -0,126 | 6E-04 | 2,9E-07 | 0,0028 |
| REACTOME_SIGNALING_BY_EGFR_IN_CANCER  | -0,146 | 6E-05 | 2,9E-07 | 0,0028 |
| CYTOSKELETAL_PART                     | -0,204 | 2E-08 | 2,9E-07 | 0,0029 |
| LINDGREN_BLADDER_CANCER_CLUSTER_3_D   | -0,091 | 0,013 | 2,9E-07 | 0,0029 |
| SIMBULAN_UV_RESPONSE_NORMAL_DN        | -0,195 | 8E-08 | 3E-07   | 0,0029 |
| LTE2_UP.V1_DN                         | -0,169 | 4E-06 | 3E-07   | 0,0029 |
| MORF_FRK                              | -0,135 | 2E-04 | 3E-07   | 0,0029 |
| GSE13411_NAIVE_VS_SWITCHED_MEMORY_E   | -0,145 | 8E-05 | 3E-07   | 0,0029 |
| MACROMOLECULAR_COMPLEX_DISASSEMBLY    | -0,21  | 7E-09 | 3E-07   | 0,003  |
| V\$OLF1_01                            | -0,142 | 1E-04 | 3,1E-07 | 0,003  |
| REGULATION_OF_METABOLIC_PROCESS       | -0,157 | 2E-05 | 3,1E-07 | 0,003  |
| GSE7460_FOXP3_MUT_VS_HET_ACT_TCONV    | -0,17  | 3E-06 | 3,1E-07 | 0,003  |
| REACTOME_PI3K_EVENTS_IN_ERBB2_SIGNALI | -0,137 | 2E-04 | 3,1E-07 | 0,003  |
| V\$T3R_Q6                             | -0,138 | 2E-04 | 3,1E-07 | 0,003  |
| GSE27786_LSK_VS_CD8_TCELL_DN          | -0,168 | 4E-06 | 3,1E-07 | 0,003  |
| V\$MYOD_01                            | -0,162 | 9E-06 | 3,1E-07 | 0,0031 |
| PROTEIN_COMPLEX_DISASSEMBLY           | -0,211 | 6E-09 | 3,2E-07 | 0,0031 |
| ZWANG_EGF_INTERVAL_UP                 | -0,18  | 7E-07 | 3,2E-07 | 0,0031 |
| GSE15930_NAIVE_VS_72H_IN_VITRO_STIM_  | -0,17  | 3E-06 | 3,2E-07 | 0,0031 |
| MCBRYAN_PUBERTAL_BREAST_6_7WK_DN      | -0,194 | 9E-08 | 3,2E-07 | 0,0031 |
| GSE20715_OH_VS_48H_OZONE_LUNG_DN      | -0,208 | 1E-08 | 3,2E-07 | 0,0031 |
| DUAN_PRDM5_TARGETS                    | -0,158 | 1E-05 | 3,2E-07 | 0,0031 |
| V\$TST1_01                            | -0,166 | 5E-06 | 3,2E-07 | 0,0031 |
| SCHAEFFER_PROSTATE_DEVELOPMENT_6HR_   | -0,19  | 2E-07 | 3,3E-07 | 0,0032 |
| BACOLOD_RESISTANCE_TO_ALKYLATING_AG   | -0,157 | 2E-05 | 3,3E-07 | 0,0032 |
| GOLGI_STACK                           | 0,19   | 2E-07 | 3,3E-07 | 0,0032 |
| V\$MYOD_Q6                            | -0,154 | 2E-05 | 3,3E-07 | 0,0032 |

|                                      |        |       |         |        |
|--------------------------------------|--------|-------|---------|--------|
| WGAATGY_V\$TEF1_Q6                   | -0,147 | 5E-05 | 3,3E-07 | 0,0032 |
| REACTOME_POTASSIUM_CHANNELS          | -0,166 | 5E-06 | 3,3E-07 | 0,0032 |
| GSE17721_CTRL_VS_POLYIC_2H_BMDM_DN   | -0,16  | 1E-05 | 3,4E-07 | 0,0033 |
| MORF_SNRP70                          | -0,176 | 1E-06 | 3,5E-07 | 0,0034 |
| V\$MTF1_Q4                           | -0,149 | 4E-05 | 3,5E-07 | 0,0034 |
| HIRSCH_CELLULAR_TRANSFORMATION_SIGNA | -0,195 | 7E-08 | 3,5E-07 | 0,0034 |
| ACACTCC,MIR-122A                     | -0,138 | 2E-04 | 3,5E-07 | 0,0034 |
| GSE17721_CTRL_VS_CPG_0.5H_BMDM_DN    | -0,17  | 3E-06 | 3,5E-07 | 0,0034 |
| WATTEL_AUTONOMOUS_THYROID_ADENOMA    | -0,126 | 6E-04 | 3,5E-07 | 0,0034 |
| GTGGTGA,MIR-197                      | -0,167 | 5E-06 | 3,6E-07 | 0,0035 |
| CORRADETTI_MTOR_PATHWAY_REGULATORS   | -0,193 | 1E-07 | 3,6E-07 | 0,0035 |
| V\$HFH1_01                           | -0,153 | 3E-05 | 3,7E-07 | 0,0035 |
| BLALOCK_ALZHEIMERS_DISEASE_UP        | -0,15  | 4E-05 | 3,7E-07 | 0,0036 |
| REACTOME_APOPTOTIC_CLEAVAGE_OF_CELL  | -0,194 | 9E-08 | 3,7E-07 | 0,0036 |
| MODULE_67                            | -0,149 | 4E-05 | 3,7E-07 | 0,0036 |
| CROMER_METASTASIS_DN                 | -0,195 | 8E-08 | 3,8E-07 | 0,0036 |
| BIOCARTA_ACTINY_PATHWAY              | -0,221 | 1E-09 | 3,8E-07 | 0,0036 |
| VERHAAK_GLIOMASTOMA_CLASSICAL        | -0,129 | 4E-04 | 3,8E-07 | 0,0037 |
| chr1q43                              | -0,163 | 8E-06 | 3,8E-07 | 0,0037 |
| MIKKELSEN_ES_ICP_WITH_H3K4ME3_AND_H: | -0,137 | 2E-04 | 3,8E-07 | 0,0037 |
| REACTOME_SOS_MEDIATED_SIGNALLING     | -0,16  | 1E-05 | 3,8E-07 | 0,0037 |
| OSMAN_BLADDER_CANCER_DN              | -0,159 | 1E-05 | 3,9E-07 | 0,0038 |
| REGULATION_OF_CELLULAR_METABOLIC_PRC | -0,157 | 2E-05 | 3,9E-07 | 0,0038 |
| TGCCAAR_V\$NF1_Q6                    | -0,139 | 1E-04 | 3,9E-07 | 0,0038 |
| BIOCARTA_CDK5_PATHWAY                | -0,158 | 1E-05 | 3,9E-07 | 0,0038 |
| GSE27786_CD8_TCELL_VS_MONO_MAC_DN    | -0,188 | 2E-07 | 4E-07   | 0,0039 |
| GAMETE_GENERATION                    | -0,134 | 2E-04 | 4E-07   | 0,0039 |
| LOPES_METHYLATED_IN_COLON_CANCER_DN  | -0,137 | 2E-04 | 4E-07   | 0,0039 |
| SHEPARD_BMYB_MORPHOLINO_DN           | -0,189 | 2E-07 | 4E-07   | 0,0039 |
| PID_ERA_GENOMIC_PATHWAY              | -0,045 | 0,216 | 4E-07   | 0,0039 |
| PEDRIOLI_MIR31_TARGETS_UP            | -0,169 | 4E-06 | 4E-07   | 0,0039 |
| REACTOME_SIGNALING_BY_BMP            | -0,138 | 2E-04 | 4,1E-07 | 0,004  |
| V\$AP4_Q6_01                         | -0,15  | 4E-05 | 4,2E-07 | 0,004  |
| DORN_ADENOVIRUS_INFECTIION_48HR_DN   | -0,163 | 8E-06 | 4,2E-07 | 0,004  |
| GSE26669_CD4_VS_CD8_TCELL_IN_MLR_UP  | -0,172 | 2E-06 | 4,2E-07 | 0,004  |
| GSE13306_RA_VS_UNTREATED_TREG_UP     | -0,155 | 2E-05 | 4,2E-07 | 0,004  |
| REACTOME_TIGHT_JUNCTION_INTERACTIONS | -0,175 | 1E-06 | 4,2E-07 | 0,0041 |
| BENPORATH_OCT4_TARGETS               | -0,18  | 8E-07 | 4,3E-07 | 0,0041 |
| GSE17721_CPG_VS_GARDIQUIMOD_0.5H_BM  | -0,146 | 6E-05 | 4,3E-07 | 0,0041 |
| chr1p31                              | -0,166 | 5E-06 | 4,3E-07 | 0,0041 |
| IDENTICAL_PROTEIN_BINDING            | -0,158 | 1E-05 | 4,3E-07 | 0,0041 |
| CCAWNWWNNNGGC_UNKNOWN                | -0,186 | 3E-07 | 4,3E-07 | 0,0042 |

|                                              |        |       |         |        |
|----------------------------------------------|--------|-------|---------|--------|
| GSE29618_PRE_VS_DAY7_POST_LAIV_FLU_MODULE_37 | -0,17  | 3E-06 | 4,3E-07 | 0,0042 |
| NAGY_TFTC_COMPONENTS_HUMAN                   | -0,127 | 5E-04 | 4,3E-07 | 0,0042 |
| GSE29614_CTRL_VS_TIV_FLU_VACCINE_PBM         | -0,182 | 6E-07 | 4,4E-07 | 0,0042 |
| CACGTG_V\$MYC_Q2                             | -0,184 | 4E-07 | 4,4E-07 | 0,0043 |
| VECCHI_GASTRIC_CANCER_EARLY_DN               | -0,174 | 2E-06 | 4,5E-07 | 0,0043 |
| GSE6269_E_COLI_VS_STREP_AUREUS_INF_PI        | -0,118 | 0,001 | 4,5E-07 | 0,0043 |
| GNF2_DNM1                                    | -0,151 | 3E-05 | 4,5E-07 | 0,0043 |
| GSE34205_RSV_VS_FLU_INF_INFANT_PBM           | -0,135 | 2E-04 | 4,5E-07 | 0,0043 |
| HOELZEL_NF1_TARGETS_UP                       | -0,109 | 0,003 | 4,5E-07 | 0,0044 |
| V\$DR3_Q4                                    | -0,173 | 2E-06 | 4,6E-07 | 0,0044 |
| GSE25087_TREG_VS_TCONV_ADULT_DN              | -0,162 | 9E-06 | 4,6E-07 | 0,0044 |
| ABRAHAM_ALPC_VS_MULTIPLE_MYELOMA_D           | -0,119 | 0,001 | 4,6E-07 | 0,0045 |
| LEE_NEURAL_CREST_STEM_CELL_DN                | -0,184 | 4E-07 | 4,6E-07 | 0,0045 |
| ACAGGGT,MIR-10A,MIR-10B                      | -0,172 | 2E-06 | 4,6E-07 | 0,0045 |
| KEGG_FOCAL_ADHESION                          | -0,194 | 1E-07 | 4,7E-07 | 0,0045 |
| CAGCTG_V\$AP4_Q5                             | -0,163 | 8E-06 | 4,7E-07 | 0,0045 |
| SCHAEFFER_PROSTATE_DEVELOPMENT_AND_B         | -0,134 | 3E-04 | 4,7E-07 | 0,0045 |
| BRUINS_UVC_RESPONSE_MIDDLE                   | -0,158 | 1E-05 | 4,7E-07 | 0,0046 |
| TURASHVILI_BREAST_LOBULAR_CARCINOMA_A        | -0,19  | 2E-07 | 4,8E-07 | 0,0046 |
| AGGGCCA,MIR-328                              | -0,154 | 2E-05 | 4,8E-07 | 0,0046 |
| GSE7852_LN_VS_THYMUS_TREG_DN                 | -0,176 | 1E-06 | 4,8E-07 | 0,0046 |
| NAKAMURA_LUNG_CANCER                         | -0,141 | 1E-04 | 4,8E-07 | 0,0046 |
| CHIARADONNA_NEOPLASTIC_TRANSFORMATIO         | -0,223 | 7E-10 | 4,8E-07 | 0,0047 |
| CALCIUM_INDEPENDENT_CELL_CELL_ADHESIO        | -0,215 | 3E-09 | 4,9E-07 | 0,0047 |
| V\$PIT1_Q6                                   | -0,178 | 1E-06 | 4,9E-07 | 0,0047 |
| CHICAS_RB1_TARGETS_GROWING                   | -0,15  | 4E-05 | 4,9E-07 | 0,0048 |
| VERHAAK_GLIOMASTOMA_MESENCHYMAL              | -0,202 | 2E-08 | 4,9E-07 | 0,0048 |
| STK33_SKM_DN                                 | -0,121 | 9E-04 | 4,9E-07 | 0,0048 |
| V\$CDP_02                                    | -0,167 | 4E-06 | 5,1E-07 | 0,0049 |
| NUCLEAR_PART                                 | -0,139 | 1E-04 | 5,1E-07 | 0,0049 |
| GSE15767_MED_VS_SCS_MAC_LN_DN                | -0,196 | 6E-08 | 5,2E-07 | 0,005  |
| V\$GF11_01                                   | -0,154 | 2E-05 | 5,2E-07 | 0,005  |
| GSE28237_FOLLICULAR_VS_EARLY_GC_BCEL         | -0,145 | 7E-05 | 5,2E-07 | 0,005  |
| NUCLEAR_LUMEN                                | -0,209 | 8E-09 | 5,2E-07 | 0,005  |
| ACCTGTTG_UNKNOWN                             | -0,201 | 3E-08 | 5,2E-07 | 0,005  |
| PID_AURORA_B_PATHWAY                         | -0,143 | 8E-05 | 5,2E-07 | 0,005  |
| BROWNE_HCMV_INFECTION_14HR_DN                | -0,183 | 5E-07 | 5,3E-07 | 0,0051 |
| V\$HFH8_01                                   | -0,171 | 3E-06 | 5,3E-07 | 0,0051 |
| GSE27786_LIN_NEG_VS_CD8_TCELL_UP             | -0,125 | 6E-04 | 5,4E-07 | 0,0052 |
| GSE3982_DC_VS_TH1_DN                         | -0,2   | 3E-08 | 5,4E-07 | 0,0052 |
| PID_LIS1PATHWAY                              | -0,195 | 9E-08 | 5,4E-07 | 0,0052 |
|                                              | -0,223 | 8E-10 | 5,5E-07 | 0,0053 |



|                                       |        |       |         |        |
|---------------------------------------|--------|-------|---------|--------|
| NADELLA_PRKAR1A_TARGETS_DN            | -0,185 | 4E-07 | 5,6E-07 | 0,0054 |
| DOANE_BREAST_CANCER_CLASSES_DN        | -0,183 | 5E-07 | 5,6E-07 | 0,0054 |
| SHEPARD_BMYB_TARGETS                  | -0,189 | 2E-07 | 5,7E-07 | 0,0055 |
| IWANAGA_CARCINOGENESIS_BY_KRAS_PTEN   | -0,161 | 1E-05 | 5,7E-07 | 0,0055 |
| YAP1_UP                               | -0,148 | 5E-05 | 5,8E-07 | 0,0056 |
| GSE36476_CTRL_VS_TSST_ACT_72H_MEMO    | -0,121 | 9E-04 | 5,8E-07 | 0,0056 |
| PID_P53REGULATIONPATHWAY              | -0,191 | 1E-07 | 5,8E-07 | 0,0056 |
| V\$SMAD_Q6                            | -0,156 | 2E-05 | 5,9E-07 | 0,0056 |
| POTASSIUM_CHANNEL_REGULATOR_ACTIVITY  | -0,14  | 1E-04 | 5,9E-07 | 0,0057 |
| GSE29618_MONOCYTE_VS_PDC_DN           | -0,176 | 1E-06 | 6E-07   | 0,0058 |
| SIMBULAN_PARP1_TARGETS_DN             | -0,196 | 7E-08 | 6E-07   | 0,0058 |
| MYOBLAST_DIFFERENTIATION              | -0,11  | 0,003 | 6E-07   | 0,0058 |
| V\$STAT_Q6                            | -0,164 | 7E-06 | 6E-07   | 0,0058 |
| APICAL_JUNCTION_COMPLEX               | -0,145 | 7E-05 | 6,2E-07 | 0,006  |
| APICOLATERAL_PLASMA_MEMBRANE          | -0,145 | 7E-05 | 6,2E-07 | 0,006  |
| V\$GATA3_01                           | -0,13  | 4E-04 | 6,2E-07 | 0,006  |
| V\$SP1_01                             | -0,112 | 0,002 | 6,3E-07 | 0,006  |
| KANG_IMMORTALIZED_BY_TERT_DN          | -0,138 | 2E-04 | 6,3E-07 | 0,006  |
| STRUCTURAL_MOLECULE_ACTIVITY          | -0,165 | 6E-06 | 6,3E-07 | 0,006  |
| CACTGCC,MIR-34A,MIR-34C,MIR-449       | -0,147 | 6E-05 | 6,3E-07 | 0,006  |
| KYNG_ENVIRONMENTAL_STRESS_RESPONSE_   | -0,144 | 8E-05 | 6,3E-07 | 0,006  |
| REACTOME_ACTIVATION_OF_RAC            | -0,183 | 5E-07 | 6,3E-07 | 0,006  |
| PLASARI_TGFB1_SIGNALING_VIA_NFIC_10HR | -0,162 | 9E-06 | 6,3E-07 | 0,0061 |
| CELL_CYCLE_PROCESS                    | -0,178 | 1E-06 | 6,3E-07 | 0,0061 |
| V\$FOXO3_01                           | -0,124 | 7E-04 | 6,4E-07 | 0,0061 |
| chr15q24                              | -0,175 | 1E-06 | 6,4E-07 | 0,0061 |
| GSE1460_INTRATHYMIC_T_PROGENITOR_VS_  | -0,171 | 3E-06 | 6,4E-07 | 0,0061 |
| GSE27786_LIN_NEG_VS_NEUTROPHIL_UP     | -0,165 | 6E-06 | 6,4E-07 | 0,0062 |
| NRL_DN.V1_DN                          | -0,144 | 8E-05 | 6,5E-07 | 0,0063 |
| METAL_ION_TRANSPORT                   | -0,117 | 0,001 | 6,5E-07 | 0,0063 |
| YANG_BREAST_CANCER_ESR1_LASER_DN      | -0,188 | 2E-07 | 6,5E-07 | 0,0063 |
| GSE17721_PAM3CSK4_VS_GADIQUIMOD_2H    | -0,127 | 5E-04 | 6,7E-07 | 0,0064 |
| WANG_TUMOR_INVASIVENESS_UP            | -0,202 | 3E-08 | 6,7E-07 | 0,0064 |
| V\$SOX9_B1                            | -0,152 | 3E-05 | 6,7E-07 | 0,0064 |
| ACAWYAAAG_UNKNOWN                     | -0,157 | 2E-05 | 6,7E-07 | 0,0065 |
| GOBERT_CORE_OLIGODENDROCYTE_DIFFEREN  | -0,16  | 1E-05 | 6,8E-07 | 0,0065 |
| GSE3982_MAST_CELL_VS_DC_UP            | -0,153 | 3E-05 | 6,8E-07 | 0,0066 |
| PID_P73PATHWAY                        | -0,193 | 1E-07 | 6,9E-07 | 0,0066 |
| LEE_LIVER_CANCER_SURVIVAL_DN          | -0,191 | 1E-07 | 6,9E-07 | 0,0067 |
| GSE27786_CD8_TCELL_VS_ERYTHROBLAST_   | -0,111 | 0,002 | 7E-07   | 0,0067 |
| GSE13493_CD4INTCD8POS_VS_CD8POS_TH1   | -0,142 | 1E-04 | 7E-07   | 0,0067 |
| PID_IGF1_PATHWAY                      | -0,129 | 4E-04 | 7,2E-07 | 0,0069 |

|                                      |        |       |         |        |
|--------------------------------------|--------|-------|---------|--------|
| ACCGAGC,MIR-423                      | -0,174 | 2E-06 | 7,2E-07 | 0,0069 |
| CHENG_IMPRINTED_BY ESTRADIOL         | -0,176 | 1E-06 | 7,3E-07 | 0,007  |
| SRC_UP.V1_DN                         | -0,204 | 2E-08 | 7,3E-07 | 0,007  |
| GSE26928_NAIVE_VS EFF_MEMORY_CD4_TC  | -0,097 | 0,008 | 7,3E-07 | 0,007  |
| OUELLET_CULTURED_OVARIAN_CANCER_INV, | -0,203 | 2E-08 | 7,3E-07 | 0,007  |
| V\$ATF_01                            | -0,158 | 1E-05 | 7,4E-07 | 0,0071 |
| MODULE_179                           | -0,156 | 2E-05 | 7,4E-07 | 0,0071 |
| LI_WILMS_TUMOR_VS_FETAL_KIDNEY_1_DN  | -0,183 | 5E-07 | 7,4E-07 | 0,0071 |
| CELL_CELL_ADHESION                   | -0,16  | 1E-05 | 7,4E-07 | 0,0071 |
| REACTOME_SIGNALLING_BY_NGF           | -0,122 | 9E-04 | 7,5E-07 | 0,0071 |
| CTCAAGA,MIR-526B                     | -0,183 | 5E-07 | 7,5E-07 | 0,0072 |
| ZHONG_RESPONSE_TO_AZACITIDINE_AND_TS | -0,169 | 4E-06 | 7,5E-07 | 0,0072 |
| VOLTAGE_GATED_POTASSIUM_CHANNEL_AC   | -0,14  | 1E-04 | 7,7E-07 | 0,0073 |
| REACTOME_SIGNALING_BY_PDGF           | -0,148 | 5E-05 | 7,7E-07 | 0,0074 |
| BASEMENT_MEMBRANE                    | -0,143 | 9E-05 | 7,7E-07 | 0,0074 |
| V\$PAX8_01                           | -0,127 | 5E-04 | 7,8E-07 | 0,0075 |
| V\$PPARA_02                          | -0,156 | 2E-05 | 7,8E-07 | 0,0075 |
| GSE7400_CTRL_VS_CSF3_IN_VIVO_TREATED | -0,188 | 2E-07 | 7,8E-07 | 0,0075 |
| SKELETAL_MUSCLE_DEVELOPMENT          | -0,133 | 3E-04 | 7,9E-07 | 0,0075 |
| KAMMINGA_SENESCENCE                  | -0,153 | 3E-05 | 7,9E-07 | 0,0076 |
| GSE3982_EOSINOPHIL_VS_CENT_MEMORY_CI | -0,174 | 2E-06 | 7,9E-07 | 0,0076 |
| POSITIVE_REGULATION_OF_CELL_CYCLE    | -0,198 | 5E-08 | 8E-07   | 0,0076 |
| WANG_LSD1_TARGETS_DN                 | -0,155 | 2E-05 | 8E-07   | 0,0076 |
| GSE13411_IGM_VS_SWITCHED_MEMORY_BCE  | -0,15  | 4E-05 | 8E-07   | 0,0076 |
| REACTOME_SIGNALING_BY_FGFR           | -0,11  | 0,003 | 8E-07   | 0,0077 |
| MEISSNER_NPC_HCP_WITH_H3_UNMETHYLAT  | -0,145 | 7E-05 | 8,1E-07 | 0,0078 |
| V\$NMYC_01                           | -0,168 | 4E-06 | 8,2E-07 | 0,0078 |
| GSE360_T_GONDII_VS_M_TUBERCULOSIS_MA | -0,169 | 4E-06 | 8,2E-07 | 0,0079 |
| GSE3982_MAC_VS_CENT_MEMORY_CD4_TCE   | -0,138 | 2E-04 | 8,3E-07 | 0,0079 |
| GSE10463_CD40L_AND_VA347_VS_CD40L_   | -0,104 | 0,004 | 8,5E-07 | 0,0081 |
| YAATNRNNNNYNATT_UNKNOWN              | -0,136 | 2E-04 | 8,6E-07 | 0,0082 |
| chr4q12                              | -0,209 | 8E-09 | 8,6E-07 | 0,0082 |
| MODULE_49                            | -0,128 | 5E-04 | 8,6E-07 | 0,0082 |
| CHEBOTAEV_GR_TARGETS_UP              | -0,128 | 5E-04 | 8,6E-07 | 0,0082 |
| GSE10239_MEMORY_VS_KLRG1HIGH_EFF_CD  | -0,112 | 0,002 | 8,7E-07 | 0,0083 |
| FEMALE_GAMETE_GENERATION             | -0,159 | 1E-05 | 8,7E-07 | 0,0083 |
| WAKABAYASHI_ADIPOGENESIS_PPARG_BOUNI | -0,124 | 7E-04 | 8,7E-07 | 0,0083 |
| GSE22886_UNSTIM_VS_IL15_STIM_NKCELL_ | -0,098 | 0,008 | 8,7E-07 | 0,0083 |
| HUANG_FOXA2_TARGETS_UP               | -0,176 | 1E-06 | 8,7E-07 | 0,0083 |
| TRANSCRIPTION_REPRESSOR_ACTIVITY     | -0,118 | 0,001 | 8,9E-07 | 0,0085 |
| GSE13411_NAIVE_BCELL_VS_PLASMA_CELL  | -0,184 | 4E-07 | 8,9E-07 | 0,0085 |
| RIZ_ERYTHROID_DIFFERENTIATION_HEMGN  | -0,141 | 1E-04 | 8,9E-07 | 0,0085 |

|                                       |        |       |         |        |
|---------------------------------------|--------|-------|---------|--------|
| MODULE_66                             | -0,125 | 6E-04 | 9E-07   | 0,0085 |
| MYOFIBRIL                             | -0,153 | 3E-05 | 9E-07   | 0,0086 |
| CCCNNGGAR_V\$OLF1_01                  | -0,13  | 4E-04 | 9E-07   | 0,0086 |
| CYTOSKELETON                          | -0,198 | 5E-08 | 9E-07   | 0,0086 |
| MOHANKUMAR_TLX1_TARGETS_DN            | -0,119 | 0,001 | 9,1E-07 | 0,0086 |
| IVANOVA_HEMATOPOIESIS_STEM_CELL_AND   | -0,121 | 1E-03 | 9,1E-07 | 0,0087 |
| JI_CARCINOGENESIS_BY_KRAS_AND_STK11_  | -0,195 | 8E-08 | 9,1E-07 | 0,0087 |
| MODULE_100                            | -0,126 | 5E-04 | 9,2E-07 | 0,0087 |
| GSE2706_R848_VS_R848_AND_LPS_2H_STI   | -0,118 | 0,001 | 9,2E-07 | 0,0087 |
| LEIN_LOCALIZED_TO_DISTAL_AND_PROXIMAL | -0,097 | 0,008 | 9,2E-07 | 0,0088 |
| GOLUB_ALL_VS_AML_UP                   | -0,186 | 3E-07 | 9,3E-07 | 0,0088 |
| NAKAYAMA_SOFT_TISSUE_TUMORS_PCA1_DI   | -0,137 | 2E-04 | 9,3E-07 | 0,0088 |
| PID_MYC_PATHWAY                       | -0,179 | 8E-07 | 9,3E-07 | 0,0089 |
| GTGACGY_V\$E4F1_Q6                    | -0,151 | 4E-05 | 9,3E-07 | 0,0089 |
| REGULATION_OF_PROTEIN_STABILITY       | -0,165 | 6E-06 | 9,5E-07 | 0,009  |
| GSE9037_WT_VS_IRAK4_KO_LPS_1H_STIM_   | -0,172 | 2E-06 | 9,5E-07 | 0,009  |
| V\$CP2_02                             | -0,14  | 1E-04 | 9,5E-07 | 0,0091 |
| BROWNE_HCMV_INFECTION_48HR_UP         | -0,172 | 2E-06 | 9,6E-07 | 0,0091 |
| GSE17974_IL4_AND_ANTI_IL12_VS_UNTREA  | -0,105 | 0,004 | 9,7E-07 | 0,0092 |
| WU_APOPTOSIS_BY_CDKN1A_NOT_VIA_TP5:   | -0,174 | 2E-06 | 9,7E-07 | 0,0092 |
| HOLLEMAN_PREDNISOLONE_RESISTANCE_B_   | -0,196 | 7E-08 | 9,8E-07 | 0,0093 |
| TIGHT_JUNCTION                        | -0,148 | 5E-05 | 9,8E-07 | 0,0093 |
| VOLTAGE_GATED_CHANNEL_ACTIVITY        | -0,088 | 0,016 | 9,8E-07 | 0,0093 |
| IWANAGA_E2F1_TARGETS_NOT_INDUCED_BY   | -0,186 | 3E-07 | 9,8E-07 | 0,0093 |
| GSE27786_LSK_VS_NKTCELL_UP            | -0,198 | 5E-08 | 9,9E-07 | 0,0094 |
| RTAAACA_V\$FREAC2_01                  | -0,125 | 6E-04 | 9,9E-07 | 0,0094 |
| GCM_RING1                             | -0,135 | 2E-04 | 9,9E-07 | 0,0094 |
| V\$GATA1_02                           | -0,139 | 1E-04 | 9,9E-07 | 0,0095 |
| NOTCH_SIGNALING_PATHWAY               | -0,159 | 1E-05 | 1E-06   | 0,0095 |
| V\$CREB_Q4                            | -0,145 | 7E-05 | 1E-06   | 0,0096 |
| SPIELMAN_LYMPHOBLAST_EUROPEAN_VS_AS   | -0,178 | 9E-07 | 1E-06   | 0,0097 |
| TCTATGA,MIR-376A,MIR-376B             | -0,16  | 1E-05 | 1E-06   | 0,0097 |
| AFFAR_YY1_TARGETS_UP                  | -0,144 | 8E-05 | 1E-06   | 0,0097 |
| SHIN_B_CELL_LYMPHOMA_CLUSTER_7        | -0,09  | 0,014 | 1E-06   | 0,0097 |
| CHIN_BREAST_CANCER_COPY_NUMBER_DN     | -0,235 | 9E-11 | 1E-06   | 0,0098 |
| V\$TEF1_Q6                            | -0,157 | 2E-05 | 1E-06   | 0,0098 |
| POMEROY_MEDULLOBLASTOMA_DESMOPLASIA   | -0,151 | 4E-05 | 1E-06   | 0,0099 |
| GAANYNYGACNY_UNKNOWN                  | -0,141 | 1E-04 | 1E-06   | 0,01   |
| GTGGGTGK_UNKNOWN                      | -0,138 | 2E-04 | 1E-06   | 0,01   |
| V\$S8_01                              | -0,128 | 5E-04 | 1,1E-06 | 0,01   |
| CUI_TCF21_TARGETS_UP                  | -0,173 | 2E-06 | 1,1E-06 | 0,01   |
| BASAKI_YBX1_TARGETS_UP                | -0,186 | 3E-07 | 1,1E-06 | 0,01   |

|                                      |        |       |         |        |
|--------------------------------------|--------|-------|---------|--------|
| V\$P300_01                           | -0,128 | 5E-04 | 1,1E-06 | 0,0101 |
| PID_BMPPATHWAY                       | -0,139 | 1E-04 | 1,1E-06 | 0,0101 |
| G_PROTEIN_SIGNALING_COUPLED_TO_CAMP_ | -0,127 | 5E-04 | 1,1E-06 | 0,0101 |
| VOLTAGE_GATED_CATION_CHANNEL_ACTIVI  | -0,092 | 0,012 | 1,1E-06 | 0,0101 |
| REACTOME_GRB2_EVENTS_IN_ERBB2_SIGNAL | -0,185 | 4E-07 | 1,1E-06 | 0,0102 |
| WANG_CLIM2_TARGETS_UP                | -0,083 | 0,023 | 1,1E-06 | 0,0102 |
| REACTOME_NGF_SIGNALLING_VIA_TRKA_FRC | -0,118 | 0,001 | 1,1E-06 | 0,0103 |
| TCCATTKW_UNKNOWN                     | -0,15  | 4E-05 | 1,1E-06 | 0,0104 |
| AMUNDSON_GENOTOXIC_SIGNATURE         | -0,172 | 2E-06 | 1,1E-06 | 0,0104 |
| KEGG_COLORECTAL_CANCER               | -0,14  | 1E-04 | 1,1E-06 | 0,0105 |
| DETECTION_OF_STIMULUS                | -0,09  | 0,014 | 1,1E-06 | 0,0105 |
| V\$POU3F2_02                         | -0,139 | 1E-04 | 1,1E-06 | 0,0106 |
| KEGG_ECM_RECEPTOR_INTERACTION        | -0,151 | 4E-05 | 1,1E-06 | 0,0106 |
| GSE29618_LAIV_VS_TIV_FLU_VACCINE_DAY | -0,149 | 4E-05 | 1,1E-06 | 0,0106 |
| TRANSFORMING_GROWTH_FACTOR_BETA_REI  | -0,1   | 0,006 | 1,1E-06 | 0,0106 |
| NGUYEN_NOTCH1_TARGETS_UP             | -0,1   | 0,006 | 1,1E-06 | 0,0107 |
| V\$NRF2_01                           | -0,199 | 5E-08 | 1,1E-06 | 0,0107 |
| DETECTION_OF ABIOTIC_STIMULUS        | -0,081 | 0,026 | 1,1E-06 | 0,0107 |
| GSE29618_PRE_VS_DAY7_POST_TIV_FLU_V  | -0,195 | 8E-08 | 1,1E-06 | 0,0107 |
| HOEGERKORP_CD44_TARGETS_TEMPORAL_UI  | -0,147 | 6E-05 | 1,1E-06 | 0,0107 |
| REACTOME_RETROGRADE_NEUROTROPHIN_SIK | -0,167 | 5E-06 | 1,1E-06 | 0,0107 |
| WTTGKCTG_UNKNOWN                     | -0,127 | 5E-04 | 1,1E-06 | 0,0109 |
| V\$AR_01                             | -0,127 | 5E-04 | 1,1E-06 | 0,0109 |
| CAMP_MEDIATED_SIGNALING              | -0,125 | 6E-04 | 1,2E-06 | 0,0109 |
| REGULATION_OF_DEFENSE_RESPONSE       | -0,174 | 2E-06 | 1,2E-06 | 0,0109 |
| YAO_TEMPORAL_RESPONSE_TO_PROGESTERC  | -0,16  | 1E-05 | 1,2E-06 | 0,0109 |
| MODULE_11                            | -0,122 | 8E-04 | 1,2E-06 | 0,0109 |
| REN_ALVEOLAR_RHABDOMYOSARCOMA_UP     | -0,142 | 1E-04 | 1,2E-06 | 0,011  |
| V\$HEN1_01                           | -0,134 | 2E-04 | 1,2E-06 | 0,011  |
| GSE2706_LPS_VS_R848_AND_LPS_2H_STIM  | -0,127 | 5E-04 | 1,2E-06 | 0,011  |
| V\$AP4_Q5                            | -0,1   | 0,006 | 1,2E-06 | 0,0111 |
| MORF_ITGA2                           | -0,169 | 4E-06 | 1,2E-06 | 0,0112 |
| GSE29615_CTRL_VS_LAIV_FLU_VACCINE_PE | -0,118 | 0,001 | 1,2E-06 | 0,0113 |
| V\$MYOGENIN_Q6                       | -0,122 | 9E-04 | 1,2E-06 | 0,0114 |
| GSE3982_EOSINOPHIL_VS_NEUTROPHIL_UP  | -0,161 | 1E-05 | 1,2E-06 | 0,0114 |
| REACTOME_ADHERENS_JUNCTIONS_INTERACT | -0,209 | 9E-09 | 1,2E-06 | 0,0115 |
| NEUROGENESIS                         | -0,125 | 7E-04 | 1,2E-06 | 0,0116 |
| MODULE_137                           | -0,124 | 7E-04 | 1,2E-06 | 0,0116 |
| RPS14_DN.V1_DN                       | -0,189 | 2E-07 | 1,2E-06 | 0,0118 |
| JUBAN_TARGETS_OF_SPI1_AND_FLI1_DN    | -0,194 | 9E-08 | 1,3E-06 | 0,0118 |
| RB_P107_DN.V1_UP                     | -0,182 | 6E-07 | 1,3E-06 | 0,0118 |
| STRIATED_MUSCLE_DEVELOPMENT          | -0,128 | 5E-04 | 1,3E-06 | 0,0119 |

|                                       |        |       |         |        |
|---------------------------------------|--------|-------|---------|--------|
| GSE17721_CTRL_VS_CPG_2H_BMDM_UP       | -0,158 | 1E-05 | 1,3E-06 | 0,0119 |
| NEGATIVE_REGULATION_OF_CELLULAR_PROC  | -0,156 | 2E-05 | 1,3E-06 | 0,012  |
| V\$PR_Q2                              | -0,13  | 4E-04 | 1,3E-06 | 0,0121 |
| GSE17721_PAM3CSK4_VS_CPG_2H_BMDM_U    | -0,126 | 5E-04 | 1,3E-06 | 0,0121 |
| V\$SRF_01                             | -0,131 | 3E-04 | 1,3E-06 | 0,0122 |
| CAIRO_HEPATOBLASTOMA_UP               | -0,163 | 7E-06 | 1,3E-06 | 0,0122 |
| GSE15659_CD45RA_NEG_CD4_TCELL_VS_A    | -0,152 | 3E-05 | 1,3E-06 | 0,0123 |
| GHANDHI_BYSTANDER_IRRADIATION_DN      | -0,156 | 2E-05 | 1,3E-06 | 0,0124 |
| INTERCELLULAR_JUNCTION                | -0,145 | 7E-05 | 1,3E-06 | 0,0124 |
| GSE27786_NKTCELL_VS_NEUTROPHIL_DN     | -0,078 | 0,034 | 1,3E-06 | 0,0124 |
| V\$PTF1BETA_Q6                        | -0,152 | 3E-05 | 1,3E-06 | 0,0125 |
| GSE2197_IMMUNOSUPPRESSIVE_DNA__VS_U   | -0,168 | 4E-06 | 1,3E-06 | 0,0125 |
| SATO_SILENCED_BY_DEACETYLATION_IN_PA  | -0,149 | 4E-05 | 1,3E-06 | 0,0126 |
| MICROTUBULE_ASSOCIATED_COMPLEX        | -0,178 | 1E-06 | 1,3E-06 | 0,0126 |
| V\$EFC_Q6                             | -0,116 | 0,001 | 1,3E-06 | 0,0126 |
| BCAT_GDS748_DN                        | -0,163 | 8E-06 | 1,3E-06 | 0,0126 |
| DAVICIONI_RHABDOMYOSARCOMA_PAX_FOXC   | -0,173 | 2E-06 | 1,3E-06 | 0,0127 |
| GSE29617_DAY3_VS_DAY7_TIV_FLU_VACCI   | -0,168 | 4E-06 | 1,4E-06 | 0,0129 |
| CONTRACTILE_FIBER                     | -0,145 | 7E-05 | 1,4E-06 | 0,0129 |
| GENERATION_OF_NEURONS                 | -0,125 | 6E-04 | 1,4E-06 | 0,013  |
| SAFFORD_T_LYMPHOCYTE_ANERGY           | -0,161 | 1E-05 | 1,4E-06 | 0,0131 |
| GSE14308_TH2_VS_INDUCED_TREG_DN       | -0,134 | 2E-04 | 1,4E-06 | 0,0131 |
| PDZ_DOMAIN_BINDING                    | -0,069 | 0,061 | 1,4E-06 | 0,0131 |
| GSE22886_NAIVE_BCELL_VS_DC_UP         | -0,154 | 2E-05 | 1,4E-06 | 0,0131 |
| BCAT_BILD_ET_AL_UP                    | -0,125 | 6E-04 | 1,4E-06 | 0,0132 |
| COLINA_TARGETS_OF_4EBP1_AND_4EBP2     | -0,182 | 5E-07 | 1,4E-06 | 0,0132 |
| REACTOME_CONVERSION_FROM_APC_C_CDC    | -0,171 | 3E-06 | 1,4E-06 | 0,0132 |
| V\$NF1_Q6                             | -0,12  | 0,001 | 1,4E-06 | 0,0133 |
| MODULE_317                            | -0,153 | 3E-05 | 1,4E-06 | 0,0134 |
| PID_A6B1_A6B4_INTEGRIN_PATHWAY        | -0,179 | 9E-07 | 1,4E-06 | 0,0134 |
| PID_REELINPATHWAY                     | -0,174 | 2E-06 | 1,4E-06 | 0,0134 |
| SINGH_KRAS_DEPENDENCY_SIGNATURE_      | -0,186 | 3E-07 | 1,4E-06 | 0,0134 |
| SABATES_COLORECTAL_ADENOMA_DN         | -0,114 | 0,002 | 1,4E-06 | 0,0135 |
| V\$AP2REP_01                          | -0,129 | 4E-04 | 1,4E-06 | 0,0136 |
| GOBERT_OLIGODENDROCYTE_DIFFERENTIATIO | -0,138 | 1E-04 | 1,5E-06 | 0,0138 |
| GSE13493_CD4INTCD8POS_VS_CD8POS_THY   | -0,082 | 0,025 | 1,5E-06 | 0,0138 |
| GTTGNYNNRGNAAC_UNKNOWN                | -0,118 | 0,001 | 1,5E-06 | 0,0139 |
| MRNA_PROCESSING_GO_0006397            | -0,202 | 3E-08 | 1,5E-06 | 0,0139 |
| MCMURRAY_TP53_HRAS_COOPERATION_RESF   | -0,142 | 1E-04 | 1,5E-06 | 0,014  |
| REACTOME_DOWNREGULATION_OF_TGF_BET    | -0,198 | 5E-08 | 1,5E-06 | 0,014  |
| GSE360_L_MAJOR_VS_M_TUBERCULOSIS_MA   | -0,176 | 1E-06 | 1,5E-06 | 0,014  |
| V\$TATA_01                            | -0,149 | 5E-05 | 1,5E-06 | 0,0141 |

|                                       |        |       |         |        |
|---------------------------------------|--------|-------|---------|--------|
| TAATTA_V\$CHX10_01                    | -0,136 | 2E-04 | 1,5E-06 | 0,0141 |
| GOBERT_OLIGODENDROCYTE_DIFFERENTIATIO | -0,168 | 4E-06 | 1,5E-06 | 0,0141 |
| YNTTTNNANGCARM_UNKNOWN                | -0,145 | 7E-05 | 1,5E-06 | 0,0141 |
| PID_MYC_ACTIVPATHWAY                  | -0,187 | 3E-07 | 1,5E-06 | 0,0142 |
| MODULE_98                             | -0,186 | 3E-07 | 1,5E-06 | 0,0142 |
| MODULE_94                             | -0,117 | 0,001 | 1,5E-06 | 0,0142 |
| SMIRNOV_RESPONSE_TO_IR_2HR_DN         | -0,188 | 2E-07 | 1,5E-06 | 0,0143 |
| V\$MYB_Q5_01                          | -0,147 | 6E-05 | 1,5E-06 | 0,0143 |
| GGATCCG,MIR-127                       | -0,082 | 0,025 | 1,5E-06 | 0,0143 |
| POTTI_5FU_SENSITIVITY                 | -0,146 | 6E-05 | 1,5E-06 | 0,0144 |
| BERENJENO_TRANSFORMED_BY_RHOA_FOREV   | -0,165 | 6E-06 | 1,5E-06 | 0,0144 |
| MODULE_378                            | -0,152 | 3E-05 | 1,5E-06 | 0,0144 |
| MODULE_214                            | -0,175 | 2E-06 | 1,5E-06 | 0,0145 |
| GSE27786_NKCELL_VS_NKTCELL_DN         | -0,129 | 4E-04 | 1,5E-06 | 0,0145 |
| MODULE_459                            | -0,152 | 3E-05 | 1,6E-06 | 0,0147 |
| GSE15930_NAIVE_VS_48H_IN_VITRO_STIM_  | -0,122 | 8E-04 | 1,6E-06 | 0,0147 |
| GGGATGC,MIR-324-5P                    | -0,17  | 3E-06 | 1,6E-06 | 0,0147 |
| GSE13229_IMM_VS_INTMATURE_NKCELL_UP   | -0,131 | 3E-04 | 1,6E-06 | 0,0149 |
| FORTSCHEGGER_PHF8_TARGETS_UP          | -0,157 | 2E-05 | 1,6E-06 | 0,0149 |
| REGULATION_OF_MITOSIS                 | -0,181 | 6E-07 | 1,6E-06 | 0,0151 |
| REACTOME_SIGNALING_BY_FGFR_IN_DISEASE | -0,111 | 0,002 | 1,6E-06 | 0,0152 |
| GATED_CHANNEL_ACTIVITY                | -0,11  | 0,003 | 1,6E-06 | 0,0152 |
| V\$RSRFC4_01                          | -0,127 | 5E-04 | 1,6E-06 | 0,0152 |
| HOXA9_DN.V1_DN                        | -0,202 | 3E-08 | 1,6E-06 | 0,0153 |
| SCHLESINGER_H3K27ME3_IN_NORMAL_AND_   | -0,126 | 6E-04 | 1,6E-06 | 0,0154 |
| YWATTWNNRGCT_UNKNOWN                  | -0,133 | 3E-04 | 1,7E-06 | 0,0155 |
| GSE360_L_DONOVANI_VS_T_GONDII_MAC_D   | -0,185 | 3E-07 | 1,7E-06 | 0,0156 |
| MEISSNER_NPC_HCP_WITH_H3K4ME2         | -0,139 | 1E-04 | 1,7E-06 | 0,0156 |
| NAKAMURA_TUMOR_ZONE_PERIPHERAL_VS_(   | -0,213 | 4E-09 | 1,7E-06 | 0,0156 |
| GSE20366_EX_VIVO_VS_DEC205_CONVERSI   | -0,127 | 5E-04 | 1,7E-06 | 0,0156 |
| GSE10239_NAIVE_VS_KLRG1HIGH_EFF_CD8_  | -0,134 | 3E-04 | 1,7E-06 | 0,0156 |
| chrXq23                               | -0,186 | 3E-07 | 1,7E-06 | 0,0157 |
| GSE17721_POLYIC_VS_CPG_0.5H_BMDM_UP   | -0,116 | 0,002 | 1,7E-06 | 0,0158 |
| V\$CREB_Q2                            | -0,141 | 1E-04 | 1,7E-06 | 0,0158 |
| CELL_PROLIFERATION_GO_0008283         | -0,172 | 2E-06 | 1,7E-06 | 0,0159 |
| ENDOCYTIC_VESICLE                     | -0,164 | 7E-06 | 1,7E-06 | 0,0159 |
| KIM_MYC_AMPLIFICATION_TARGETS_UP      | -0,191 | 1E-07 | 1,7E-06 | 0,016  |
| MICROTUBULE_CYTOSKELETON              | -0,188 | 2E-07 | 1,7E-06 | 0,0161 |
| MODULE_497                            | -0,125 | 6E-04 | 1,7E-06 | 0,0161 |
| AMIT_EGF_RESPONSE_120_HELA            | -0,162 | 9E-06 | 1,7E-06 | 0,0161 |
| CTCTGGA,MIR-520A,MIR-525              | -0,192 | 1E-07 | 1,7E-06 | 0,0162 |
| YAATNANRNNNCAG_UNKNOWN                | -0,126 | 5E-04 | 1,7E-06 | 0,0162 |

|                                       |        |       |         |        |
|---------------------------------------|--------|-------|---------|--------|
| ESTABLISHMENT_AND_OR_MAINTENANCE_OF   | -0,19  | 2E-07 | 1,7E-06 | 0,0163 |
| CTTTAAR_UNKNOWN                       | -0,129 | 4E-04 | 1,7E-06 | 0,0163 |
| TCTGGAC,MIR-198                       | -0,168 | 4E-06 | 1,7E-06 | 0,0163 |
| CATION_CHANNEL_ACTIVITY               | -0,124 | 7E-04 | 1,7E-06 | 0,0164 |
| DOANE_BREAST_CANCER_ESR1_DN           | -0,172 | 2E-06 | 1,7E-06 | 0,0164 |
| REACTOME_ACTIVATION_OF_KAINATE_RECEF  | -0,12  | 0,001 | 1,8E-06 | 0,0165 |
| BURTON_ADIPOGENESIS_1                 | -0,134 | 2E-04 | 1,8E-06 | 0,0167 |
| MARTORIATI_MDM4_TARGETS_NEUROEPITHEL  | -0,156 | 2E-05 | 1,8E-06 | 0,0167 |
| SMID_BREAST_CANCER_BASAL_UP           | -0,177 | 1E-06 | 1,8E-06 | 0,0168 |
| GSE22886_TH1_VS_TH2_12H_ACT_UP        | -0,147 | 5E-05 | 1,8E-06 | 0,017  |
| HERNANDEZ_MITOTIC_ARREST_BY_DOCETAXI  | -0,152 | 3E-05 | 1,8E-06 | 0,0171 |
| GUO_TARGETS_OF_IRS1_AND_IRS2          | -0,104 | 0,005 | 1,8E-06 | 0,0171 |
| YAUCH_HEDGEHOG_SIGNALING_PARACRINE_L  | -0,089 | 0,015 | 1,8E-06 | 0,0173 |
| GSE3982_BCELL_VS_TH2_DN               | -0,198 | 5E-08 | 1,9E-06 | 0,0174 |
| GSE13306_TREG_RA_VS_TCONV_RA_UP       | -0,145 | 7E-05 | 1,9E-06 | 0,0174 |
| V\$TFIIA_Q6                           | -0,122 | 8E-04 | 1,9E-06 | 0,0174 |
| WEIGEL_OXIDATIVE_STRESS_BY_HNE_AND_H  | -0,193 | 1E-07 | 1,9E-06 | 0,0174 |
| V\$LXR_DR4_Q3                         | -0,161 | 1E-05 | 1,9E-06 | 0,0174 |
| PHESSSE_TARGETS_OF_APC_AND_MBD2_UP    | -0,086 | 0,019 | 1,9E-06 | 0,0174 |
| GSE27786_BCELL_VS_ERYTHROBLAST_DN     | -0,091 | 0,013 | 1,9E-06 | 0,0176 |
| MIKKELSEN_NPC_WITH_LCP_H3K27ME3       | -0,101 | 0,006 | 1,9E-06 | 0,0176 |
| HERNANDEZ_MITOTIC_ARREST_BY_DOCETAXI  | -0,168 | 4E-06 | 1,9E-06 | 0,0177 |
| GSE27786_NKTCELL_VS_NEUTROPHIL_UP     | -0,183 | 5E-07 | 1,9E-06 | 0,0177 |
| V\$FOXO4_02                           | -0,125 | 6E-04 | 1,9E-06 | 0,0177 |
| WEIGEL_OXIDATIVE_STRESS_RESPONSE      | -0,191 | 1E-07 | 1,9E-06 | 0,0177 |
| GSE24634_TEFF_VS_TCONV_DAY10_IN_CUL   | -0,191 | 2E-07 | 1,9E-06 | 0,0178 |
| TAKADA_GASTRIC_CANCER_COPY_NUMBER_I   | -0,19  | 2E-07 | 1,9E-06 | 0,0178 |
| V\$AREB6_01                           | -0,152 | 3E-05 | 1,9E-06 | 0,0178 |
| STEGER_ADIPOGENESIS_DN                | -0,137 | 2E-04 | 1,9E-06 | 0,0179 |
| GSE3982_MAC_VS_TH1_DN                 | -0,184 | 4E-07 | 1,9E-06 | 0,0179 |
| V\$STAT5A_01                          | -0,14  | 1E-04 | 1,9E-06 | 0,018  |
| V\$STAT1_01                           | -0,157 | 2E-05 | 1,9E-06 | 0,018  |
| GSE10325_CD4_TCELL_VS_LUPUS_CD4_TCE   | -0,089 | 0,016 | 1,9E-06 | 0,0181 |
| MOTOR_ACTIVITY                        | -0,149 | 4E-05 | 2E-06   | 0,0182 |
| ACEVEDO_LIVER_CANCER_WITH_H3K27ME3_   | -0,166 | 6E-06 | 2E-06   | 0,0183 |
| JECHLINGER_EPITHELIAL_TO_MESENCHYMAL_ | -0,138 | 2E-04 | 2E-06   | 0,0184 |
| ION_CHANNEL_ACTIVITY                  | -0,12  | 0,001 | 2E-06   | 0,0186 |
| BILD_E2F3_ONCOGENIC_SIGNATURE         | -0,134 | 2E-04 | 2E-06   | 0,0186 |
| MEISSNER_BRAIN_HCP_WITH_H3K4ME2_AND   | -0,158 | 1E-05 | 2E-06   | 0,0187 |
| NIKOLSKY_BREAST_CANCER_1Q32_AMPLICOI  | -0,128 | 5E-04 | 2E-06   | 0,019  |
| CHANDRAN_METASTASIS_DN                | -0,094 | 0,01  | 2E-06   | 0,019  |
| CTGYNNCTYTAA_UNKNOWN                  | -0,162 | 9E-06 | 2E-06   | 0,019  |

|                                      |        |       |         |        |
|--------------------------------------|--------|-------|---------|--------|
| GSE1460_DP_VS_CD4_THYMOCYTE_UP       | -0,177 | 1E-06 | 2E-06   | 0,0191 |
| BERENJENO_TRANSFORMED_BY_RHOA_REVEF  | -0,158 | 2E-05 | 2,1E-06 | 0,0191 |
| ION_TRANSPORT                        | -0,12  | 0,001 | 2,1E-06 | 0,0193 |
| MODULE_255                           | -0,147 | 5E-05 | 2,1E-06 | 0,0193 |
| MORF_MAP3K14                         | -0,114 | 0,002 | 2,1E-06 | 0,0196 |
| BENPORATH_SUZ12_TARGETS              | -0,124 | 7E-04 | 2,1E-06 | 0,0196 |
| V\$E2F4DP1_01                        | -0,182 | 6E-07 | 2,1E-06 | 0,0196 |
| V\$LMO2COM_01                        | -0,101 | 0,006 | 2,1E-06 | 0,0197 |
| PUJANA_BRCA1_PCC_NETWORK             | -0,191 | 1E-07 | 2,1E-06 | 0,0198 |
| MODULE_397                           | -0,174 | 2E-06 | 2,1E-06 | 0,0198 |
| V\$GATA_C                            | -0,122 | 8E-04 | 2,1E-06 | 0,0199 |
| GSE15659_NAIVE_CD4_TCELL_VS_ACTIVATI | -0,186 | 3E-07 | 2,2E-06 | 0,02   |
| V\$NFY_C                             | -0,173 | 2E-06 | 2,2E-06 | 0,0201 |
| SIG_IL4RECEPTOR_IN_B_LYPHOCYTES      | -0,138 | 2E-04 | 2,2E-06 | 0,0203 |
| GSE1460_DP_THYMOCYTE_VS_NAIVE_CD4_1  | -0,199 | 4E-08 | 2,2E-06 | 0,0204 |
| RICKMAN_HEAD_AND_NECK_CANCER_D       | -0,125 | 6E-04 | 2,2E-06 | 0,0206 |
| CYTOSKELETAL_PROTEIN_BINDING         | -0,156 | 2E-05 | 2,2E-06 | 0,0207 |
| GSE11057_NAIVE_VS_EFF_MEMORY_CD4_TC  | -0,118 | 0,001 | 2,2E-06 | 0,0208 |
| PRC2_SUZ12_UP.V1_UP                  | -0,145 | 7E-05 | 2,2E-06 | 0,0208 |
| MODULE_147                           | -0,185 | 3E-07 | 2,2E-06 | 0,0209 |
| AATGGAG,MIR-136                      | -0,138 | 2E-04 | 2,3E-06 | 0,0211 |
| V\$NFAT_Q6                           | -0,148 | 5E-05 | 2,3E-06 | 0,0211 |
| BYSTRYKH_HEMATOPOIESIS_STEM_CELL_ANC | -0,184 | 4E-07 | 2,3E-06 | 0,0211 |
| G_PROTEIN_SIGNALING_ADENYLATE_CYCLAS | -0,122 | 8E-04 | 2,3E-06 | 0,0214 |
| V\$LEF1_Q2                           | -0,154 | 2E-05 | 2,3E-06 | 0,0214 |
| FIGUEROA_AML_METHYLATION_CLUSTER_6_I | -0,136 | 2E-04 | 2,3E-06 | 0,0214 |
| RAMASWAMY_METASTASIS_UP              | -0,177 | 1E-06 | 2,3E-06 | 0,0217 |
| GSE1448_ANTI_VALPHA2_VS_VBETA5_DP_   | -0,142 | 1E-04 | 2,3E-06 | 0,0217 |
| GSE32423_CTRL_VS_IL4_MEMORY_CD8_TCE  | -0,133 | 3E-04 | 2,3E-06 | 0,0217 |
| PID_RB_1PATHWAY                      | -0,183 | 5E-07 | 2,3E-06 | 0,0218 |
| LU_TUMOR_ENDOTHELIAL_MARKERS_DN      | -0,089 | 0,015 | 2,3E-06 | 0,0218 |
| TGATTRY_V\$GFI1_01                   | -0,122 | 8E-04 | 2,4E-06 | 0,0219 |
| REACTOME_DOWNSTREAM_SIGNAL_TRANSDL   | -0,125 | 7E-04 | 2,4E-06 | 0,0221 |
| V\$STAT5B_01                         | -0,136 | 2E-04 | 2,4E-06 | 0,0222 |
| V\$PAX4_03                           | -0,128 | 5E-04 | 2,4E-06 | 0,0222 |
| REACTOME_VOLTAGE_GATED_POTASSIUM_CI  | -0,151 | 4E-05 | 2,4E-06 | 0,0223 |
| KEGG_MTOR_SIGNALING_PATHWAY          | -0,149 | 5E-05 | 2,4E-06 | 0,0223 |
| GSE15930_NAIVE_VS_48H_IN_VITRO_STIM_ | -0,112 | 0,002 | 2,4E-06 | 0,0223 |
| GSE360_CTRL_VS_T_GONDII_MAC_DN       | -0,17  | 3E-06 | 2,4E-06 | 0,0224 |
| chr11p11                             | -0,166 | 6E-06 | 2,4E-06 | 0,0225 |
| GSE27786_LSK_VS_NKCELL_UP            | -0,151 | 4E-05 | 2,4E-06 | 0,0226 |
| GGTGRR_V\$PAX4_03                    | -0,132 | 3E-04 | 2,4E-06 | 0,0226 |



|                                       |        |       |         |        |
|---------------------------------------|--------|-------|---------|--------|
| POSITIVE_REGULATION_OF_NUCLEOBASENUC  | -0,128 | 4E-04 | 2,4E-06 | 0,0228 |
| NEGATIVE_REGULATION_OF_TRANSCRIPTION  | -0,125 | 6E-04 | 2,5E-06 | 0,0228 |
| GSE7460_FOXP3_MUT_VS_WT_ACT_TCONV     | -0,112 | 0,002 | 2,5E-06 | 0,023  |
| DAWSON_METHYLATED_IN_LYMPHOMA_TCL1    | -0,145 | 7E-05 | 2,5E-06 | 0,023  |
| GSE29615_DAY3_VS_DAY7_LAIV_FLU_VAC    | -0,09  | 0,014 | 2,5E-06 | 0,0231 |
| NEGATIVE_REGULATION_OF_BIOLOGICAL_PRC | -0,147 | 6E-05 | 2,5E-06 | 0,0232 |
| GSE15659_NONSUPPRESSIVE_TCELL_VS_AC   | -0,179 | 9E-07 | 2,5E-06 | 0,0232 |
| FOURNIER_ACINAR_DEVELOPMENT_EARLY_DN  | -0,194 | 9E-08 | 2,5E-06 | 0,0233 |
| MCBRYAN_PUBERTAL_TGFB1_TARGETS_DN     | -0,164 | 7E-06 | 2,5E-06 | 0,0234 |
| RESPONSE_TO_ENDOGENOUS_STIMULUS       | -0,15  | 4E-05 | 2,5E-06 | 0,0235 |
| KORKOLA_TERATOMA                      | -0,16  | 1E-05 | 2,6E-06 | 0,0237 |
| GSE11924_TFH_VS_TH17_CD4_TCELL_DN     | -0,191 | 1E-07 | 2,6E-06 | 0,0238 |
| GOLDRATH_EFF_VS_MEMORY_CD8_TCELL_DI   | -0,114 | 0,002 | 2,6E-06 | 0,024  |
| HOSHIDA_LIVER_CANCER_SURVIVAL_UP      | -0,15  | 4E-05 | 2,6E-06 | 0,0241 |
| LEE_CALORIE_RESTRICTION_NEOCORTEX_DN  | -0,155 | 2E-05 | 2,6E-06 | 0,0242 |
| PID_NFAT_3PATHWAY                     | -0,172 | 2E-06 | 2,6E-06 | 0,0243 |
| V\$ELK1_Q1                            | -0,122 | 9E-04 | 2,6E-06 | 0,0243 |
| CHANG_POU5F1_TARGETS_DN               | -0,141 | 1E-04 | 2,6E-06 | 0,0244 |
| GTCGATC,MIR-369-5P                    | -0,156 | 2E-05 | 2,6E-06 | 0,0244 |
| SUZUKI_RESPONSE_TO_TSA_AND_DECITABIN  | -0,15  | 4E-05 | 2,6E-06 | 0,0244 |
| TRANSMEMBRANE_RECEPTOR_PROTEIN_SERIN  | -0,101 | 0,006 | 2,6E-06 | 0,0245 |
| V\$E2F_Q6                             | -0,181 | 6E-07 | 2,6E-06 | 0,0245 |
| V\$AMEF2_Q6                           | -0,131 | 3E-04 | 2,7E-06 | 0,0246 |
| GRAESSMANN_RESPONSE_TO_MC_AND_DOXC    | -0,191 | 1E-07 | 2,7E-06 | 0,0248 |
| BENPORATH_CYCLING_GENES               | -0,175 | 1E-06 | 2,7E-06 | 0,025  |
| GTCAACC,MIR-380-5P                    | -0,189 | 2E-07 | 2,7E-06 | 0,0251 |
| REACTOME_NFKB_IS_ACTIVATED_AND_SIGNA  | -0,136 | 2E-04 | 2,7E-06 | 0,0253 |
| V\$AREB6_Q2                           | -0,14  | 1E-04 | 2,8E-06 | 0,0256 |
| FIGUEROA_AML_METHYLATION_CLUSTER_3_I  | -0,163 | 8E-06 | 2,8E-06 | 0,0257 |
| PID_PI3KPLCTRKPATWAY                  | -0,152 | 3E-05 | 2,8E-06 | 0,0258 |
| CTAGGAA,MIR-384                       | -0,134 | 2E-04 | 2,8E-06 | 0,0258 |
| REGULATION_OF_ORGANELLE_ORGANIZATION  | -0,122 | 8E-04 | 2,8E-06 | 0,0258 |
| GSE14000_4H_VS_16H_LPS_DC_DN          | -0,176 | 1E-06 | 2,8E-06 | 0,0258 |
| MODULE_532                            | -0,149 | 5E-05 | 2,8E-06 | 0,026  |
| MODULE_284                            | -0,146 | 7E-05 | 2,8E-06 | 0,026  |
| V\$TITF1_Q3                           | -0,13  | 4E-04 | 2,8E-06 | 0,0261 |
| PIGF_UP.V1_DN                         | -0,143 | 9E-05 | 2,8E-06 | 0,0261 |
| KEGG_PATHWAYS_IN_CANCER               | -0,155 | 2E-05 | 2,8E-06 | 0,0262 |
| GSE2706_R848_VS_LPS_2H_STIM_DC_UP     | -0,135 | 2E-04 | 2,9E-06 | 0,0264 |
| GSE3982_MAST_CELL_VS_CENT_MEMORY_C    | -0,141 | 1E-04 | 2,9E-06 | 0,0265 |
| BENPORATH_EED_TARGETS                 | -0,13  | 4E-04 | 2,9E-06 | 0,0266 |
| TGACAGNY_V\$MEIS1_Q1                  | -0,133 | 3E-04 | 2,9E-06 | 0,0266 |

|                                                |        |       |         |        |
|------------------------------------------------|--------|-------|---------|--------|
| REACTOME_EGFR_DOWNREGULATION                   | -0,185 | 4E-07 | 2,9E-06 | 0,0267 |
| GSE15930_STIM_VS_STIM_AND_IFNAB_72H_MODULE_356 | -0,133 | 3E-04 | 2,9E-06 | 0,0268 |
| CTTTGA_V\$LEF1_Q2                              | -0,182 | 6E-07 | 2,9E-06 | 0,0268 |
| KEGG_VASCULAR_SMOOTH_MUSCLE_CONTRA             | -0,107 | 0,003 | 2,9E-06 | 0,0268 |
| DOUGLAS_BMI1_TARGETS_UP                        | -0,171 | 3E-06 | 2,9E-06 | 0,0271 |
| HOFMANN_MYELODYSPLASTIC_SYNDROM_HIC            | -0,135 | 2E-04 | 3E-06   | 0,0273 |
| BHATI_G2M_ARREST_BY_2METHOXYESTRADI            | -0,194 | 1E-07 | 3E-06   | 0,0273 |
| GSE3982_BCELL_VS_CENT_MEMORY_CD4_TI            | -0,135 | 2E-04 | 3E-06   | 0,0274 |
| NEURON_DEVELOPMENT                             | -0,105 | 0,004 | 3E-06   | 0,0278 |
| BONOME_OVARIAN_CANCER_SURVIVAL_SUBC            | -0,095 | 0,01  | 3E-06   | 0,0278 |
| S_PHASE                                        | -0,172 | 2E-06 | 3E-06   | 0,0278 |
| GSE1460_CD4_THYMOCYTE_VS_NAIVE_CD4             | -0,158 | 2E-05 | 3E-06   | 0,028  |
| TGFB_UP.V1_UP                                  | -0,142 | 1E-04 | 3E-06   | 0,0281 |
| MORF_ORC1L                                     | -0,148 | 5E-05 | 3,1E-06 | 0,0282 |
| STEIN_ESR1_TARGETS                             | -0,1   | 0,006 | 3,1E-06 | 0,0283 |
| NOUZOVA_METHYLATED_IN_APL                      | -0,127 | 5E-04 | 3,1E-06 | 0,0284 |
| V\$SP1_Q4_01                                   | -0,129 | 4E-04 | 3,1E-06 | 0,0285 |
| CYTOSKELETON_ORGANIZATION_AND_BIOGEN           | -0,155 | 2E-05 | 3,1E-06 | 0,0285 |
| GSE30962_PRIMARY_VS_SECONDARY_CHRON            | -0,199 | 5E-08 | 3,1E-06 | 0,0285 |
| PEPPER_CHRONIC_LYMPHOCYTIC_LEUKEMIA_I          | -0,088 | 0,017 | 3,2E-06 | 0,0291 |
| GSE17721_POLYIC_VS_GARDIQUIMOD_0.5H            | -0,138 | 2E-04 | 3,2E-06 | 0,0292 |
| HOLLEMAN_VINCISTINE_RESISTANCE_B_ALL           | -0,186 | 3E-07 | 3,2E-06 | 0,0292 |
| TERAO_AOX4_TARGETS_SKIN_DN                     | -0,133 | 3E-04 | 3,2E-06 | 0,0295 |
| KRAS.600_UP.V1_UP                              | -0,146 | 7E-05 | 3,2E-06 | 0,0295 |
| CHROMOSOME_ORGANIZATION_AND_BIOGENE            | -0,178 | 1E-06 | 3,2E-06 | 0,0296 |
| TTGTTT_V\$FOXO4_01                             | -0,129 | 4E-04 | 3,2E-06 | 0,0297 |
| SCHAEFFER_PROSTATE_DEVELOPMENT_12HR            | -0,136 | 2E-04 | 3,2E-06 | 0,0297 |
| RCGCANGCGY_V\$NRF1_Q6                          | -0,158 | 2E-05 | 3,3E-06 | 0,03   |
| GSE17721_CTRL_VS_CPG_24H_BMDM_DN               | -0,185 | 4E-07 | 3,3E-06 | 0,0302 |
| POSITIVE_REGULATION_OF_EPITHELIAL_CELL         | -0,206 | 1E-08 | 3,3E-06 | 0,0303 |
| TTCNRGNNTTC_V\$HSF_Q6                          | -0,151 | 4E-05 | 3,3E-06 | 0,0303 |
| V\$HEN1_02                                     | -0,124 | 7E-04 | 3,3E-06 | 0,0304 |
| V\$RORA2_01                                    | -0,112 | 0,002 | 3,3E-06 | 0,0305 |
| V\$GR_Q6                                       | -0,123 | 8E-04 | 3,3E-06 | 0,0306 |
| CELLULAR_COMPONENT_ASSEMBLY                    | -0,146 | 7E-05 | 3,3E-06 | 0,0307 |
| BERENJENO_TRANSFORMED_BY_RHOA_UP               | -0,184 | 4E-07 | 3,3E-06 | 0,0308 |
| V\$GATA6_01                                    | -0,128 | 5E-04 | 3,4E-06 | 0,0311 |
| GSE13229_MATURE_VS_INTMATURE_NKCELL            | -0,145 | 7E-05 | 3,4E-06 | 0,0312 |
| V\$STAT5A_03                                   | -0,143 | 9E-05 | 3,4E-06 | 0,0312 |
| DING_LUNG_CANCER_MUTATED_SIGNIFICANT           | -0,13  | 4E-04 | 3,5E-06 | 0,0319 |
| BENPORATH_ES_2                                 | -0,183 | 5E-07 | 3,5E-06 | 0,032  |

|                                                |        |       |         |        |
|------------------------------------------------|--------|-------|---------|--------|
| GSE3982_NEUTROPHIL_VS_EFF_MEMORY_CD            | -0,182 | 6E-07 | 3,5E-06 | 0,0321 |
| MEISSNER_BRAIN_HCP_WITH_H3K4ME3_AND_V\$WHN_B   | -0,141 | 1E-04 | 3,5E-06 | 0,0321 |
| V\$POU1F1_Q6                                   | -0,121 | 9E-04 | 3,5E-06 | 0,0322 |
| V\$POU1F1_Q6                                   | -0,154 | 3E-05 | 3,5E-06 | 0,0325 |
| GSE15324_ELF4_KO_VS_WT_ACTIVATED_CI_MODULE_198 | -0,157 | 2E-05 | 3,5E-06 | 0,0326 |
| MODULE_198                                     | -0,178 | 1E-06 | 3,5E-06 | 0,0326 |
| SCHAEFFER_PROSTATE_DEVELOPMENT_48HR            | -0,131 | 3E-04 | 3,6E-06 | 0,0333 |
| BIOCARTA_MPR_PATHWAY                           | -0,152 | 3E-05 | 3,6E-06 | 0,0335 |
| PARK_HSC_MARKERS                               | -0,158 | 2E-05 | 3,7E-06 | 0,0337 |
| GSE17974_IL4_AND_ANTI_IL12_VS_UNTREA           | -0,16  | 1E-05 | 3,7E-06 | 0,0337 |
| RNA_BINDING                                    | -0,176 | 1E-06 | 3,7E-06 | 0,034  |
| MORF_DCC                                       | -0,145 | 7E-05 | 3,7E-06 | 0,0342 |
| PROTEIN_COMPLEX_BINDING                        | -0,143 | 9E-05 | 3,7E-06 | 0,0344 |
| GSE15930_NAIVE_VS_72H_IN_VITRO_STIM_           | -0,133 | 3E-04 | 3,8E-06 | 0,0346 |
| GSE360_L_MAJOR_VS_T_GONDII_DC_DN               | -0,122 | 9E-04 | 3,8E-06 | 0,0347 |
| REACTOME_DEVELOPMENTAL_BIOLOGY                 | -0,137 | 2E-04 | 3,8E-06 | 0,0349 |
| YAMASHITA_LIVER_CANCER_WITH_EPCAM_UI           | -0,173 | 2E-06 | 3,8E-06 | 0,035  |
| ZHENG_GLIOMASTOMA_PLASTICITY_DN                | -0,118 | 0,001 | 3,8E-06 | 0,0351 |
| GSE29618_PRE_VS_DAY7_FLU_VACCINE_MC            | -0,147 | 5E-05 | 3,8E-06 | 0,0353 |
| LEIN_MIDBRAIN_MARKERS                          | -0,126 | 5E-04 | 3,9E-06 | 0,0354 |
| XU_RESPONSE_TO_TRETINOIN_DN                    | -0,202 | 3E-08 | 3,9E-06 | 0,0355 |
| GSE27786_NKCELL_VS_ERYTHROBLAST_DN             | -0,107 | 0,003 | 3,9E-06 | 0,0356 |
| V\$CEBPGAMMA_Q6                                | -0,135 | 2E-04 | 3,9E-06 | 0,0358 |
| RESPONSE_TO_RADIATION                          | -0,146 | 7E-05 | 3,9E-06 | 0,0359 |
| LIU_CDX2_TARGETS_UP                            | -0,137 | 2E-04 | 3,9E-06 | 0,036  |
| V\$ATF4_Q2                                     | -0,144 | 8E-05 | 3,9E-06 | 0,0363 |
| V\$MZF1_01                                     | -0,133 | 3E-04 | 4E-06   | 0,0363 |
| SIG_INSULIN_RECEPTOR_PATHWAY_IN_CARDI          | -0,173 | 2E-06 | 4E-06   | 0,0364 |
| TATAAA_V\$TATA_01                              | -0,135 | 2E-04 | 4E-06   | 0,0365 |
| WHITFIELD_CELL_CYCLE_G2_M                      | -0,177 | 1E-06 | 4E-06   | 0,0368 |
| MODULE_381                                     | -0,097 | 0,008 | 4E-06   | 0,0369 |
| GSE3982_MAST_CELL_VS_TH2_DN                    | -0,176 | 1E-06 | 4E-06   | 0,0369 |
| KOYAMA_SEMA3B_TARGETS_DN                       | -0,162 | 9E-06 | 4E-06   | 0,037  |
| SCHRAMM_INHBA_TARGETS_DN                       | -0,15  | 4E-05 | 4E-06   | 0,037  |
| TTCYRGAA_UNKNOWN                               | -0,149 | 4E-05 | 4E-06   | 0,0371 |
| MODULE_220                                     | -0,154 | 2E-05 | 4,1E-06 | 0,0372 |
| PERIPHERAL_NERVOUS_SYSTEM_DEVELOPMEI           | -0,164 | 7E-06 | 4,1E-06 | 0,0372 |
| V\$FREAC2_01                                   | -0,146 | 6E-05 | 4,1E-06 | 0,0375 |
| MURAKAMI_UV_RESPONSE_6HR_UP                    | -0,161 | 1E-05 | 4,1E-06 | 0,0375 |
| GSE13485_DAY1_VS_DAY21_YF17D_VACCII            | -0,111 | 0,002 | 4,1E-06 | 0,0376 |
| V\$NRF2_Q4                                     | -0,151 | 4E-05 | 4,1E-06 | 0,0376 |
| GSE15659_NAIVE_CD4_TCELL_VS_ACTIVATI           | -0,158 | 2E-05 | 4,1E-06 | 0,0376 |

|                                      |        |       |         |        |
|--------------------------------------|--------|-------|---------|--------|
| MOROSSETTI_FACIOSCAPULOHUMERAL_MUSCU | -0,152 | 3E-05 | 4,1E-06 | 0,0377 |
| MORF_IL9                             | -0,108 | 0,003 | 4,2E-06 | 0,038  |
| GSE27786_NKTCELL_VS_MONO_MAC_DN      | -0,17  | 3E-06 | 4,2E-06 | 0,0381 |
| FUJIWARA_PARK2_IN_LIVER_CANCER_DN    | -0,18  | 8E-07 | 4,2E-06 | 0,0381 |
| REACTOME_SIGNALING_BY_TGF_BETA_RECEP | -0,195 | 8E-08 | 4,2E-06 | 0,0382 |
| CHICAS_RB1_TARGETS_SENESCENT         | -0,19  | 2E-07 | 4,2E-06 | 0,0384 |
| ZWANG_DOWN_BY_2ND_EGF_PULSE          | -0,121 | 1E-03 | 4,2E-06 | 0,0385 |
| GAUSSMANN_MLL_AF4_FUSION_TARGETS_D   | -0,147 | 5E-05 | 4,2E-06 | 0,0386 |
| GSE3982_DC_VS_TH2_DN                 | -0,178 | 1E-06 | 4,3E-06 | 0,0389 |
| V\$MYB_Q3                            | -0,121 | 9E-04 | 4,3E-06 | 0,0389 |
| REACTOME_P75NTR_SIGNALS_VIA_NFKB     | -0,161 | 9E-06 | 4,3E-06 | 0,039  |
| GSE3982_MAC_VS_BASOPHIL_DN           | -0,135 | 2E-04 | 4,3E-06 | 0,0392 |
| GTGTGAG,MIR-342                      | -0,191 | 1E-07 | 4,3E-06 | 0,0393 |
| KEGG_TGF_BETA_SIGNALING_PATHWAY      | -0,138 | 2E-04 | 4,3E-06 | 0,0393 |
| CRX_NRL_DN.V1_UP                     | -0,098 | 0,007 | 4,3E-06 | 0,0393 |
| GSE9006_1MONTH_VS_4MONTH_POST_TYPE   | -0,13  | 4E-04 | 4,3E-06 | 0,0394 |
| V\$POU6F1_01                         | -0,115 | 0,002 | 4,3E-06 | 0,0394 |
| NEURON_DIFFERENTIATION               | -0,114 | 0,002 | 4,3E-06 | 0,0396 |
| GSE3982_DC_VS_EFF_MEMORY_CD4_TCELL   | -0,124 | 7E-04 | 4,4E-06 | 0,0398 |
| TENEDINI_MEGAKARYOCYTE_MARKERS       | -0,145 | 7E-05 | 4,4E-06 | 0,0403 |
| TGGAAA_V\$NFAT_Q4_01                 | -0,128 | 4E-04 | 4,4E-06 | 0,0403 |
| V\$SRF_Q6                            | -0,129 | 4E-04 | 4,4E-06 | 0,0403 |
| MODULE_18                            | -0,197 | 6E-08 | 4,4E-06 | 0,0403 |
| GSE14308_TH17_VS_INDUCED_TREG_DN     | -0,165 | 6E-06 | 4,4E-06 | 0,0403 |
| GSE22886_NAIVE_TCELL_VS_NKCELL_UP    | -0,151 | 4E-05 | 4,4E-06 | 0,0405 |
| MAHADEVAN_GIST_MORPHOLOGICAL_SWITCH  | -0,157 | 2E-05 | 4,5E-06 | 0,0407 |
| MODULE_206                           | -0,153 | 3E-05 | 4,5E-06 | 0,0409 |
| GSE14769_UNSTIM_VS_360MIN_LPS_BMDM   | -0,186 | 3E-07 | 4,5E-06 | 0,0409 |
| HORMONE_ACTIVITY                     | -0,111 | 0,002 | 4,5E-06 | 0,0411 |
| GSE13411_IGM_MEMORY_BCELL_VS_PLASMA  | -0,183 | 5E-07 | 4,5E-06 | 0,0411 |
| GSE9988_LPS_VS_LOW_LPS_MONOCYTE_DN   | -0,136 | 2E-04 | 4,5E-06 | 0,0412 |
| V\$HOXA4_Q2                          | -0,145 | 7E-05 | 4,5E-06 | 0,0413 |
| M_PHASE                              | -0,167 | 5E-06 | 4,5E-06 | 0,0413 |
| GSE26928_EFF_MEM_VS_CENTR_MEM_CD4    | -0,156 | 2E-05 | 4,5E-06 | 0,0413 |
| V\$NFY_Q6_01                         | -0,19  | 2E-07 | 4,5E-06 | 0,0414 |
| PID_SYNDECAN_4_PATHWAY               | -0,173 | 2E-06 | 4,5E-06 | 0,0415 |
| GSE14769_UNSTIM_VS_240MIN_LPS_BMDM   | -0,178 | 1E-06 | 4,6E-06 | 0,0418 |
| MCCLUNG_CREB1_TARGETS_DN             | -0,151 | 4E-05 | 4,6E-06 | 0,0418 |
| GSE24026_PD1_LIGATION_VS_CTRL_IN_ACT | -0,191 | 1E-07 | 4,6E-06 | 0,0421 |
| GSE13485_DAY7_VS_DAY21_YF17D_VACCII  | -0,138 | 2E-04 | 4,6E-06 | 0,0421 |
| SEXUAL_REPRODUCTION                  | -0,105 | 0,004 | 4,6E-06 | 0,0423 |
| GSE18791_UNSTIM_VS_NEWCATSLE_VIRUS   | -0,164 | 7E-06 | 4,6E-06 | 0,0423 |

|                                      |        |       |         |        |
|--------------------------------------|--------|-------|---------|--------|
| TGCACGA,MIR-517A,MIR-517C            | -0,142 | 1E-04 | 4,6E-06 | 0,0423 |
| MEL18_DN.V1_DN                       | -0,121 | 1E-03 | 4,7E-06 | 0,0427 |
| MORF_RFC5                            | -0,189 | 2E-07 | 4,7E-06 | 0,0429 |
| V\$NKX25_02                          | -0,138 | 2E-04 | 4,7E-06 | 0,043  |
| BIOCARTA_SHH_PATHWAY                 | -0,127 | 5E-04 | 4,7E-06 | 0,0431 |
| MUELLER_PLURINET                     | -0,172 | 2E-06 | 4,7E-06 | 0,0431 |
| V\$SP3_Q3                            | -0,111 | 0,002 | 4,7E-06 | 0,0431 |
| chr7p14                              | -0,141 | 1E-04 | 4,7E-06 | 0,0431 |
| MODULE_163                           | -0,128 | 5E-04 | 4,7E-06 | 0,0431 |
| MORI_EMU_MYC_LYMPHOMA_BY_ONSET_TIMI  | -0,169 | 4E-06 | 4,8E-06 | 0,0433 |
| KONDO_COLON_CANCER_HCP_WITH_H3K27M   | -0,179 | 9E-07 | 4,8E-06 | 0,0434 |
| CELL_JUNCTION                        | -0,128 | 5E-04 | 4,8E-06 | 0,0434 |
| GSE20366_CD103_POS_VS_NEG_TREG_KLRK  | -0,145 | 7E-05 | 4,8E-06 | 0,0436 |
| V\$HSF_Q6                            | -0,142 | 1E-04 | 4,8E-06 | 0,0439 |
| GAUSSMANN_MLL_AF4_FUSION_TARGETS_C   | -0,159 | 1E-05 | 4,8E-06 | 0,0441 |
| GSE28237_FOLLICULAR_VS_EARLY_GC_BCEL | -0,126 | 6E-04 | 4,9E-06 | 0,0442 |
| STAMBOLSKY_TARGETS_OF_MUTATED_TP53   | -0,167 | 4E-06 | 4,9E-06 | 0,0443 |
| REACTOME_DOWNSTREAM_SIGNALING_OF_AI  | -0,091 | 0,013 | 4,9E-06 | 0,0443 |
| WCTCNATGGY_UNKNOWN                   | -0,076 | 0,038 | 4,9E-06 | 0,0444 |
| NIELSEN_LEIOMYOSARCOMA_CNN1_DN       | -0,165 | 6E-06 | 4,9E-06 | 0,0446 |
| GCM_MAPK10                           | -0,151 | 3E-05 | 4,9E-06 | 0,0448 |
| NRL_DN.V1_UP                         | -0,119 | 0,001 | 4,9E-06 | 0,0448 |
| KOHOUTEK_CCNT2_TARGETS               | -0,136 | 2E-04 | 4,9E-06 | 0,0449 |
| GSE36476_YOUNG_VS_OLD_DONOR_MEMOR    | -0,112 | 0,002 | 5E-06   | 0,0453 |
| HEIDENBLAD_AMPLICON_12P11_12_DN      | -0,14  | 1E-04 | 5E-06   | 0,0453 |
| V\$PAX2_02                           | -0,13  | 4E-04 | 5E-06   | 0,0454 |
| V\$OCT1_05                           | -0,138 | 2E-04 | 5E-06   | 0,0454 |
| S_PHASE_OF_MITOTIC_CELL_CYCLE        | -0,157 | 2E-05 | 5,1E-06 | 0,0461 |
| NUYTEN_EZH2_TARGETS_DN               | -0,17  | 3E-06 | 5,1E-06 | 0,0463 |
| RADAEVA_RESPONSE_TO_IFNA1_DN         | -0,147 | 6E-05 | 5,1E-06 | 0,0463 |
| BILANGES_SERUM_SENSITIVE_VIA_TSC1    | -0,107 | 0,004 | 5,1E-06 | 0,0466 |
| PID_ILK_PATHWAY                      | -0,19  | 2E-07 | 5,2E-06 | 0,0471 |
| HAN_SATB1_TARGETS_UP                 | -0,144 | 8E-05 | 5,2E-06 | 0,0472 |
| TOMIDA_METASTASIS_UP                 | -0,197 | 6E-08 | 5,2E-06 | 0,0472 |
| V\$OCT1_Q6                           | -0,133 | 3E-04 | 5,2E-06 | 0,0473 |
| CCAWWNAAGG_V\$SRF_Q4                 | -0,125 | 6E-04 | 5,2E-06 | 0,0477 |
| WONG_ENDMETRIUM_CANCER_DN            | -0,095 | 0,009 | 5,3E-06 | 0,0477 |
| CAIRO_PML_TARGETS_BOUND_BY_MYC_UP    | -0,179 | 8E-07 | 5,3E-06 | 0,0478 |
| INGRAM_SHH_TARGETS_DN                | -0,143 | 9E-05 | 5,3E-06 | 0,0478 |
| VANHARANTA_UTERINE_FIBROID_UP        | -0,162 | 8E-06 | 5,3E-06 | 0,048  |
| WU_ALZHEIMER_DISEASE_UP              | -0,164 | 7E-06 | 5,3E-06 | 0,0483 |
| V\$NKX3A_01                          | -0,132 | 3E-04 | 5,3E-06 | 0,0485 |

|                                      |        |       |         |        |
|--------------------------------------|--------|-------|---------|--------|
| TRANSCRIPTION_COREPRESSOR_ACTIVITY   | -0,132 | 3E-04 | 5,4E-06 | 0,0486 |
| NEURITE_DEVELOPMENT                  | -0,114 | 0,002 | 5,4E-06 | 0,0487 |
| PID_HEDGEHOG_GLIPTHWAY               | -0,113 | 0,002 | 5,4E-06 | 0,0491 |
| V\$LXR_Q3                            | -0,152 | 3E-05 | 5,4E-06 | 0,0492 |
| V\$CART1_01                          | -0,148 | 5E-05 | 5,4E-06 | 0,0492 |
| RNCTGNYNRNCTGNY_UNKNOWN              | -0,126 | 6E-04 | 5,4E-06 | 0,0494 |
| FIGUEROA_AML_METHYLATION_CLUSTER_7_I | -0,103 | 0,005 | 5,5E-06 | 0,0497 |
| NAKAYAMA_FGF2_TARGETS                | -0,161 | 9E-06 | 5,5E-06 | 0,0497 |
| EBAUER_TARGETS_OF_PAX3_FOXO1_FUSION  | -0,154 | 2E-05 | 5,5E-06 | 0,0497 |
| V\$FOXJ2_01                          | -0,133 | 3E-04 | 5,5E-06 | 0,05   |
| SIMBULAN_UV_RESPONSE_IMMORTALIZED_DN | -0,174 | 2E-06 | 5,5E-06 | 0,0502 |
| MYLLYKANGAS_AMPLIFICATION_HOT_SPOT_1 | -0,16  | 1E-05 | 5,5E-06 | 0,0502 |
| GSE3982_EOSINOPHIL_VS_TH2_DN         | -0,188 | 2E-07 | 5,6E-06 | 0,0504 |
| REGULATION_OF_NEUROGENESIS           | -0,103 | 0,005 | 5,6E-06 | 0,0505 |
| LEE_CALORIE_RESTRICTION_NEOCORTEX_UP | -0,161 | 9E-06 | 5,6E-06 | 0,0506 |
| RYTGCNRRGNAAC_V\$MIF1_01             | -0,078 | 0,033 | 5,6E-06 | 0,0507 |
| chr9q12                              | -0,144 | 8E-05 | 5,6E-06 | 0,0508 |
| MULTICELLULAR_ORGANISMAL_DEVELOPMENT | -0,146 | 7E-05 | 5,6E-06 | 0,051  |
| GSE29618_PRE_VS_DAY7_FLU_VACCINE_PD  | -0,135 | 2E-04 | 5,6E-06 | 0,0511 |
| BIOCARTA_CTCF_PATHWAY                | -0,137 | 2E-04 | 5,6E-06 | 0,0511 |
| KYNG_ENVIRONMENTAL_STRESS_RESPONSE_I | -0,15  | 4E-05 | 5,7E-06 | 0,0512 |
| SHETH_LIVER_CANCER_VS_TXNIP_LOSS_PAM | -0,164 | 7E-06 | 5,7E-06 | 0,0515 |
| BRUINS_UVC_RESPONSE_LATE             | -0,158 | 1E-05 | 5,7E-06 | 0,0518 |
| BROWNE_HCMV_INFECTION_1HR_DN         | -0,15  | 4E-05 | 5,8E-06 | 0,0522 |
| TSENG_IRS1_TARGETS_UP                | -0,183 | 5E-07 | 5,8E-06 | 0,0524 |
| V\$E47_01                            | -0,15  | 4E-05 | 5,8E-06 | 0,0525 |
| GSE25087_TREG_VS_TCONV_FETUS_DN      | -0,13  | 4E-04 | 5,8E-06 | 0,0525 |
| KRAS.300_UP.V1_UP                    | -0,149 | 4E-05 | 5,8E-06 | 0,0527 |
| V\$E4BP4_01                          | -0,129 | 4E-04 | 5,8E-06 | 0,0529 |
| AXONOGENESIS                         | -0,104 | 0,005 | 5,9E-06 | 0,053  |
| V\$HNF3ALPHA_Q6                      | -0,116 | 0,002 | 5,9E-06 | 0,0534 |
| GSE3982_NEUTROPHIL_VS_NKCELL_DN      | -0,164 | 7E-06 | 5,9E-06 | 0,0535 |
| QI_PLASMACYTOMA_DN                   | -0,162 | 9E-06 | 5,9E-06 | 0,0536 |
| V\$CDC5_01                           | -0,12  | 0,001 | 5,9E-06 | 0,0538 |
| GSE15750_WT_VS_TRAF6KO_DAY6_EFF_CD   | -0,151 | 4E-05 | 6E-06   | 0,0538 |
| V\$AREB6_04                          | -0,143 | 9E-05 | 6E-06   | 0,0539 |
| GSE15930_NAIVE_VS_48H_IN_VITRO_STIM_ | -0,094 | 0,011 | 6E-06   | 0,0539 |
| TONKS_TARGETS_OF_RUNX1_RUNX1T1_FUSI  | -0,118 | 0,001 | 6E-06   | 0,0544 |
| MEMBRANE_ENCLOSED_LUMEN              | -0,186 | 3E-07 | 6,1E-06 | 0,0548 |
| ORGANELLE_LUMEN                      | -0,186 | 3E-07 | 6,1E-06 | 0,0548 |
| GSE17721_CPG_VS_GARDIQUIMOD_4H_BMDN  | -0,124 | 7E-04 | 6,1E-06 | 0,0554 |
| chr4p15                              | -0,16  | 1E-05 | 6,2E-06 | 0,056  |

|                                      |        |       |         |        |
|--------------------------------------|--------|-------|---------|--------|
| AAAYWAACM_V\$HFH4_01                 | -0,113 | 0,002 | 6,2E-06 | 0,056  |
| TGCTGAY_UNKNOWN                      | -0,134 | 2E-04 | 6,2E-06 | 0,0561 |
| CONRAD_STEM_CELL                     | -0,176 | 1E-06 | 6,2E-06 | 0,0564 |
| GSE22886_NAIVE_CD8_TCELL_VS_NKCELL_  | -0,143 | 9E-05 | 6,3E-06 | 0,0566 |
| DUTERTRE_ESTRADIOL_RESPONSE_24HR_UP  | -0,149 | 5E-05 | 6,3E-06 | 0,0567 |
| BOYALT_LIVER_CANCER_SUBCLASS_G56_U   | -0,083 | 0,024 | 6,3E-06 | 0,0568 |
| REGIONALIZATION                      | -0,107 | 0,003 | 6,3E-06 | 0,0571 |
| LE_EGR2_TARGETS_UP                   | -0,166 | 5E-06 | 6,3E-06 | 0,0571 |
| V\$PITX2_Q2                          | -0,147 | 5E-05 | 6,3E-06 | 0,0571 |
| REACTOME_NCAM1_INTERACTIONS          | -0,144 | 8E-05 | 6,4E-06 | 0,0575 |
| GHO_ATF5_TARGETS_DN                  | -0,187 | 3E-07 | 6,4E-06 | 0,0575 |
| GSE2706_LPS_VS_R848_AND_LPS_2H_STIM  | -0,122 | 8E-04 | 6,4E-06 | 0,0577 |
| GSE27786_BCELL_VS_NKCELL_UP          | -0,146 | 6E-05 | 6,4E-06 | 0,0577 |
| GSE15930_STIM_VS_STIM_AND_IFNAB_24H_ | -0,131 | 4E-04 | 6,5E-06 | 0,0584 |
| GSE3982_MAC_VS_BCELL_DN              | -0,127 | 5E-04 | 6,5E-06 | 0,0585 |
| AAAGGAT,MIR-501                      | -0,159 | 1E-05 | 6,5E-06 | 0,0586 |
| GROWTH                               | -0,096 | 0,009 | 6,6E-06 | 0,0591 |
| GSE29618_PRE_VS_DAY7_FLU_VACCINE_BC  | -0,166 | 5E-06 | 6,6E-06 | 0,0594 |
| MOREAUX_MULTIPLE_MYELOMA_BY_TACI_UP  | -0,122 | 9E-04 | 6,6E-06 | 0,0594 |
| GSE17721_POLYIC_VS_CPG_1H_BMDM_UP    | -0,143 | 9E-05 | 6,6E-06 | 0,0595 |
| GCM_SUPT4H1                          | -0,131 | 3E-04 | 6,6E-06 | 0,0595 |
| REACTOME_MUSCLE_CONTRACTION          | -0,142 | 1E-04 | 6,6E-06 | 0,0597 |
| V\$MAZR_01                           | -0,101 | 0,006 | 6,6E-06 | 0,0598 |
| CERVERA_SDHB_TARGETS_1_UP            | -0,114 | 0,002 | 6,6E-06 | 0,0599 |
| GSE15659_CD45RA_NEG_CD4_TCELL_VS_N   | -0,119 | 0,001 | 6,6E-06 | 0,0599 |
| KEGG_LONG_TERM_POTENTIATION          | -0,149 | 5E-05 | 6,7E-06 | 0,0603 |
| MODULE_112                           | -0,126 | 6E-04 | 6,7E-06 | 0,0603 |
| TRAYNOR_RETT_SYNDROM_DN              | -0,107 | 0,003 | 6,8E-06 | 0,0609 |
| KYNG_ENVIRONMENTAL_STRESS_RESPONSE_  | -0,138 | 2E-04 | 6,8E-06 | 0,0613 |
| V\$AP1_Q2_01                         | -0,159 | 1E-05 | 6,8E-06 | 0,0614 |
| RAO_BOUND_BY_SALL4_ISOFORM_A         | -0,124 | 7E-04 | 6,8E-06 | 0,0616 |
| JIANG_VHL_TARGETS                    | -0,18  | 7E-07 | 6,8E-06 | 0,0616 |
| BMI1_DN_MEL18_DN.V1_DN               | -0,116 | 0,002 | 6,9E-06 | 0,0617 |
| chr9q13                              | -0,144 | 8E-05 | 6,9E-06 | 0,0617 |
| DANG_BOUND_BY_MYC                    | -0,187 | 3E-07 | 6,9E-06 | 0,0619 |
| KAYO_AGING_MUSCLE_UP                 | -0,148 | 5E-05 | 6,9E-06 | 0,062  |
| PID_ERBB1_INTERNALIZATION_PATHWAY    | -0,168 | 4E-06 | 6,9E-06 | 0,0625 |
| MISHRA_CARCINOMA_ASSOCIATED_FIBROBLA | -0,128 | 4E-04 | 7E-06   | 0,0627 |
| GCCNNWTAAR_UNKNOWN                   | -0,137 | 2E-04 | 7E-06   | 0,0629 |
| PID_RHOA_PATHWAY                     | -0,161 | 1E-05 | 7E-06   | 0,0629 |
| BENPORATH_ES_WITH_H3K27ME3           | -0,112 | 0,002 | 7E-06   | 0,0633 |
| V\$MMEF2_Q6                          | -0,126 | 6E-04 | 7,1E-06 | 0,0634 |

|                                      |        |       |         |        |
|--------------------------------------|--------|-------|---------|--------|
| AGGAAGC,MIR-516-3P                   | -0,152 | 3E-05 | 7,1E-06 | 0,0636 |
| RIGGI_EWING_SARCOMA_PROGENITOR_UP    | -0,122 | 9E-04 | 7,1E-06 | 0,0636 |
| BENPORATH_ES_1                       | -0,19  | 2E-07 | 7,1E-06 | 0,0637 |
| MODULE_124                           | -0,165 | 6E-06 | 7,1E-06 | 0,0637 |
| PURBEY_TARGETS_OF_CTBP1_AND_SATB1_I  | -0,165 | 6E-06 | 7,1E-06 | 0,064  |
| WONG_ADULT_TISSUE_STEM_MODULE        | -0,117 | 0,001 | 7,1E-06 | 0,0642 |
| SYSTEM_DEVELOPMENT                   | -0,147 | 5E-05 | 7,1E-06 | 0,0642 |
| KEGG_CELL_CYCLE                      | -0,166 | 5E-06 | 7,2E-06 | 0,0643 |
| STRUCTURAL_CONSTITUENT_OF_CYTOSKELE  | -0,15  | 4E-05 | 7,2E-06 | 0,0645 |
| TESAR_ALK_AND_JAK_TARGETS_MOUSE_ES.  | -0,152 | 3E-05 | 7,2E-06 | 0,0646 |
| GSE10325_BCELL_VS_LUPUS_BCELL_UP     | -0,072 | 0,048 | 7,2E-06 | 0,0648 |
| CELLULAR_PROTEIN_METABOLIC_PROCESS   | -0,159 | 1E-05 | 7,2E-06 | 0,0649 |
| VALK_AML_CLUSTER_12                  | -0,152 | 3E-05 | 7,3E-06 | 0,0655 |
| CHESLER_BRAIN_HIGHEST_EXPRESSION     | -0,121 | 1E-03 | 7,3E-06 | 0,0655 |
| NUCLEOPLASM                          | -0,18  | 8E-07 | 7,3E-06 | 0,0657 |
| GSE22886_NAIVE_CD4_TCELL_VS_48H_ACT  | -0,066 | 0,072 | 7,4E-06 | 0,066  |
| BOYLAN_MULTIPLE_MYELOMA_C_UP         | -0,164 | 7E-06 | 7,4E-06 | 0,0661 |
| GSE9650_EFFECTOR_VS_MEMORY_CD8_TCEL  | -0,113 | 0,002 | 7,4E-06 | 0,0661 |
| GSE14308_TH2_VS_NAIVE_CD4_TCELL_UP   | -0,181 | 6E-07 | 7,4E-06 | 0,0661 |
| GSE339_CD4POS_VS_CD4CD8DN_DC_IN_CUI  | -0,142 | 1E-04 | 7,4E-06 | 0,0663 |
| REACTOME_SMOOTH_MUSCLE_CONTRACTION   | -0,152 | 3E-05 | 7,4E-06 | 0,0663 |
| V\$MEF2_03                           | -0,119 | 0,001 | 7,5E-06 | 0,0671 |
| EBAUER_MYOGENIC_TARGETS_OF_PAX3_FOX  | -0,115 | 0,002 | 7,5E-06 | 0,0672 |
| V\$HAND1E47_01                       | -0,139 | 1E-04 | 7,5E-06 | 0,0673 |
| DACOSTA_ERCC3_ALLELE_XPCS_VS_TTD_UF  | -0,176 | 1E-06 | 7,6E-06 | 0,0678 |
| MODULE_215                           | -0,172 | 2E-06 | 7,6E-06 | 0,068  |
| INACTIVATION_OF_MAPK_ACTIVITY        | -0,169 | 4E-06 | 7,6E-06 | 0,0685 |
| TGACCTY_V\$ERR1_Q2                   | -0,129 | 4E-04 | 7,7E-06 | 0,0688 |
| GSE3982_MAC_VS_EFF_MEMORY_CD4_TCEL   | -0,153 | 3E-05 | 7,7E-06 | 0,0692 |
| MODULE_433                           | -0,153 | 3E-05 | 7,7E-06 | 0,0692 |
| GSE15659_NAIVE_CD4_TCELL_VS_RESTING_ | -0,157 | 2E-05 | 7,7E-06 | 0,0693 |
| YAUCH_HEDGEHOG_SIGNALING_PARACRINE_I | -0,126 | 6E-04 | 7,7E-06 | 0,0693 |
| V\$AR_03                             | -0,082 | 0,026 | 7,7E-06 | 0,0694 |
| REACTOME_NEGATIVE_REGULATION_OF_THE  | -0,143 | 9E-05 | 7,8E-06 | 0,0696 |
| PEDERSEN_METASTASIS_BY_ERBB2_ISOFORM | -0,106 | 0,004 | 7,8E-06 | 0,0698 |
| GSE13493_DP_VS_CD8POS_THYMOCYTE_UP   | -0,128 | 4E-04 | 7,8E-06 | 0,0698 |
| GSE3982_NEUTROPHIL_VS_TH1_DN         | -0,185 | 4E-07 | 7,8E-06 | 0,0699 |
| CORDENONSI_YAP_CONSERVED_SIGNATURE   | -0,176 | 1E-06 | 7,8E-06 | 0,0699 |
| GSE15750_WT_VS_TRAF6KO_DAY10_EFF_C   | -0,117 | 0,001 | 7,8E-06 | 0,0702 |
| GSE10239_MEMORY_VS_KLRG1INT_EFF_CD8  | -0,108 | 0,003 | 7,8E-06 | 0,0702 |
| REGULATION_OF_ANATOMICAL_STRUCTURE_  | -0,113 | 0,002 | 7,8E-06 | 0,0702 |
| INAMURA_LUNG_CANCER_SCC_DN           | -0,104 | 0,005 | 7,9E-06 | 0,0705 |



|                                       |        |       |         |        |
|---------------------------------------|--------|-------|---------|--------|
| CCANNAGRKGGC_UNKNOWN                  | -0,09  | 0,014 | 7,9E-06 | 0,0707 |
| V\$PBX1_01                            | -0,122 | 8E-04 | 7,9E-06 | 0,0711 |
| SENESE_HDAC3_TARGETS_DN               | -0,17  | 3E-06 | 8E-06   | 0,0712 |
| MODULE_195                            | -0,172 | 2E-06 | 8E-06   | 0,0712 |
| MIKKELSEN_MEF_HCP_WITH_H3_UNMETHYLA   | -0,143 | 9E-05 | 8E-06   | 0,0712 |
| PROTEIN_TYROSINE_KINASE_ACTIVITY      | -0,137 | 2E-04 | 8E-06   | 0,0712 |
| MODULE_95                             | -0,125 | 6E-04 | 8E-06   | 0,0716 |
| LABBE_TGFB1_TARGETS_UP                | -0,165 | 6E-06 | 8E-06   | 0,0719 |
| BENPORATH_NOS_TARGETS                 | -0,166 | 5E-06 | 8,1E-06 | 0,0722 |
| GSE7460_CTRL_VS_TGFB_TREATED_ACT_TR   | -0,117 | 0,001 | 8,1E-06 | 0,0724 |
| HANSON_HRAS_SIGNALING_VIA_NFKB        | -0,16  | 1E-05 | 8,1E-06 | 0,0724 |
| V\$P53_DECAMER_Q2                     | -0,123 | 7E-04 | 8,2E-06 | 0,0731 |
| DNA_MODIFICATION                      | -0,176 | 1E-06 | 8,2E-06 | 0,0733 |
| POSITIVE_REGULATION_OF_CELLULAR_COMPI | -0,095 | 0,01  | 8,2E-06 | 0,0737 |
| GSE15930_STIM_VS_STIM_AND_IL-12_72H   | -0,153 | 3E-05 | 8,3E-06 | 0,0742 |
| SMOOTH_MUSCLE_CONTRACTION_GO_00069    | -0,162 | 9E-06 | 8,4E-06 | 0,075  |
| GSE22886_IGA_VS_IGM_MEMORY_BCELL_UP   | -0,152 | 3E-05 | 8,4E-06 | 0,075  |
| ESC_V6.5_UP_LATE.V1_DN                | -0,156 | 2E-05 | 8,4E-06 | 0,0752 |
| V\$GR_Q6_01                           | -0,124 | 7E-04 | 8,4E-06 | 0,0754 |
| TGGNNNNNNKCCAR_UNKNOWN                | -0,107 | 0,003 | 8,6E-06 | 0,0767 |
| GNF2_MAPT                             | -0,107 | 0,004 | 8,6E-06 | 0,0771 |
| NUCLEAR_BODY                          | -0,137 | 2E-04 | 8,6E-06 | 0,0772 |
| MEISSNER_ES_ICP_WITH_H3K4ME3_AND_H3I  | -0,108 | 0,003 | 8,7E-06 | 0,0773 |
| SCHLINGEMANN_SKIN_CARCINOGENESIS_TPA  | -0,105 | 0,004 | 8,7E-06 | 0,0777 |
| MEK_UP.V1_DN                          | -0,091 | 0,012 | 8,7E-06 | 0,0779 |
| MIKKELSEN_ES_ICP_WITH_H3K4ME3         | -0,089 | 0,015 | 8,7E-06 | 0,0779 |
| GENTILE_RESPONSE_CLUSTER_D3           | -0,191 | 1E-07 | 8,7E-06 | 0,0779 |
| KEGG_NEUROACTIVE_LIGAND_RECEPTOR_INT  | -0,117 | 0,001 | 8,7E-06 | 0,0779 |
| GSE24634_IL4_VS_CTRL_TREATED_NAIVE_C  | -0,151 | 4E-05 | 8,8E-06 | 0,0786 |
| KEGG_PURINE_METABOLISM                | -0,122 | 8E-04 | 8,8E-06 | 0,0786 |
| RIZKI_TUMOR_INVASIVENESS_3D_UP        | -0,109 | 0,003 | 8,8E-06 | 0,0787 |
| CELL_DEVELOPMENT                      | -0,141 | 1E-04 | 8,8E-06 | 0,0789 |
| BIOCARTA_TEL_PATHWAY                  | -0,152 | 3E-05 | 8,9E-06 | 0,0791 |
| GCM_PTPRU                             | -0,166 | 5E-06 | 8,9E-06 | 0,0792 |
| V\$E2F_Q4                             | -0,174 | 2E-06 | 8,9E-06 | 0,0793 |
| GSE3982_NKCELL_VS_TH2_UP              | -0,134 | 2E-04 | 8,9E-06 | 0,0794 |
| V\$SRF_Q5_01                          | -0,116 | 0,002 | 9E-06   | 0,0798 |
| TTTNNANAGCYR_UNKNOWN                  | -0,202 | 3E-08 | 9E-06   | 0,0805 |
| SESTO_RESPONSE_TO_UV_C8               | -0,167 | 4E-06 | 9E-06   | 0,0806 |
| JEPSEN_SMRT_TARGETS                   | -0,144 | 8E-05 | 9,1E-06 | 0,0808 |
| TGGTGCT,MIR-29A,MIR-29B,MIR-29C       | -0,145 | 7E-05 | 9,1E-06 | 0,0811 |
| V\$BRN2_01                            | -0,119 | 0,001 | 9,2E-06 | 0,0817 |

|                                        |        |       |         |        |
|----------------------------------------|--------|-------|---------|--------|
| ISSAEVA_MLL2_TARGETS                   | -0,163 | 8E-06 | 9,2E-06 | 0,0818 |
| RAAGNYNNCTTY_UNKNOWN                   | -0,138 | 2E-04 | 9,2E-06 | 0,0819 |
| V\$TAL1BETAIF2_01                      | -0,118 | 0,001 | 9,2E-06 | 0,0823 |
| GSE1460_NAIVE_CD4_TCELL_ADULT_BLOOD    | -0,189 | 2E-07 | 9,2E-06 | 0,0824 |
| CASORELLI_APL_SECONDARY_VS_DE_NOVO_    | -0,16  | 1E-05 | 9,3E-06 | 0,0826 |
| REACTOME_AXON_GUIDANCE                 | -0,145 | 7E-05 | 9,4E-06 | 0,0837 |
| ENGELMANN_CANCER_PROGENITORS_DN        | -0,082 | 0,025 | 9,5E-06 | 0,0843 |
| PLASARI_TGFB1_TARGETS_10HR_UP          | -0,149 | 4E-05 | 9,5E-06 | 0,0844 |
| TTCYNRGAA_V\$STAT5B_01                 | -0,133 | 3E-04 | 9,5E-06 | 0,0845 |
| SUZUKI_RESPONSE_TO_TSA_AND_DECITABIN   | -0,125 | 6E-04 | 9,5E-06 | 0,0846 |
| GSE13485_DAY3_VS_DAY21_YF17D_VACCII    | -0,106 | 0,004 | 9,6E-06 | 0,0851 |
| REGULATION_OF_ACTION_POTENTIAL         | -0,158 | 1E-05 | 9,6E-06 | 0,0858 |
| GSE7460_CTRL_VS_FOXP3_OVEREXPR_TCON    | -0,13  | 4E-04 | 9,7E-06 | 0,0862 |
| GSE6269_STREP_AUREUS_VS_STREP_PNEUM    | -0,129 | 4E-04 | 9,7E-06 | 0,0864 |
| STAMBOLSKY_BOUND_BY_MUTATED_TP53       | -0,131 | 4E-04 | 9,8E-06 | 0,0868 |
| GSE3982_CTRL_VS_LPS_1H_NEUTROPHIL_DI   | -0,117 | 0,001 | 9,8E-06 | 0,0868 |
| G1_PHASE                               | -0,161 | 1E-05 | 9,8E-06 | 0,0868 |
| GSE360_L_MAJOR_VS_T_GONDII_DC_UP       | -0,118 | 0,001 | 9,8E-06 | 0,087  |
| G_PROTEIN_SIGNALING_ADENYLATE_CYCLAS   | -0,119 | 0,001 | 9,9E-06 | 0,0876 |
| V\$CACCCBINDINGFACTOR_Q6               | -0,13  | 4E-04 | 9,9E-06 | 0,0876 |
| V\$CDPCR1_01                           | -0,111 | 0,002 | 9,9E-06 | 0,0879 |
| GSE17974_0H_VS_0.5H_IN_VITRO_ACT_CD    | -0,148 | 5E-05 | 9,9E-06 | 0,0882 |
| GSE24142_ADULT_VS_FETAL_EARLY_THYMI    | -0,112 | 0,002 | 1E-05   | 0,0885 |
| CELLULAR_MACROMOLECULE_METABOLIC_PR    | -0,154 | 2E-05 | 1E-05   | 0,0887 |
| RNA_PROCESSING                         | -0,183 | 5E-07 | 1E-05   | 0,0894 |
| HOMOPHILIC_CELL_ADHESION               | -0,134 | 2E-04 | 1E-05   | 0,0895 |
| SMID_BREAST_CANCER_LUMINAL_B_DN        | -0,168 | 4E-06 | 1E-05   | 0,0897 |
| V\$E2F1DP1RB_01                        | -0,169 | 3E-06 | 1E-05   | 0,0897 |
| IL21_UP.V1_UP                          | -0,129 | 4E-04 | 1E-05   | 0,0897 |
| GSE22886_TH1_VS_TH2_48H_ACT_UP         | -0,152 | 3E-05 | 1E-05   | 0,09   |
| GSE2706_UNSTIM_VS_2H_LPS_DC_UP         | -0,086 | 0,018 | 1E-05   | 0,09   |
| GSE17721_PAM3CSK4_VS_GADIQUIMOD_0.5    | -0,141 | 1E-04 | 1E-05   | 0,0905 |
| GSE1460_DP_THYMOCYTE_VS_NAIVE_CD4_1    | -0,114 | 0,002 | 1E-05   | 0,0907 |
| CELL_SURFACE                           | -0,102 | 0,005 | 1E-05   | 0,0909 |
| TGACATY_UNKNOWN                        | -0,113 | 0,002 | 1E-05   | 0,0911 |
| G1_PHASE_OF_MITOTIC_CELL_CYCLE         | -0,16  | 1E-05 | 1E-05   | 0,0918 |
| VALK_AML_CLUSTER_6                     | -0,131 | 3E-04 | 1E-05   | 0,0922 |
| NADLER_HYPERGLYCEMIA_AT_OBESITY        | -0,167 | 5E-06 | 1E-05   | 0,0924 |
| V\$PAX4_01                             | -0,097 | 0,008 | 1E-05   | 0,0928 |
| SUBSTRATE_SPECIFIC_CHANNEL_ACTIVITY    | -0,114 | 0,002 | 1,1E-05 | 0,0932 |
| BENPORATH_PRC2_TARGETS                 | -0,108 | 0,003 | 1,1E-05 | 0,0932 |
| RASHI_RESPONSE_TO_IONIZING_RADIATION_5 | -0,11  | 0,003 | 1,1E-05 | 0,0945 |

|                                      |        |       |         |        |
|--------------------------------------|--------|-------|---------|--------|
| GSE15324_ELF4_KO_VS_WT_NAIVE_CD8_T   | -0,125 | 6E-04 | 1,1E-05 | 0,0946 |
| V\$AHRARNT_01                        | -0,144 | 8E-05 | 1,1E-05 | 0,0949 |
| MODULE_12                            | -0,129 | 4E-04 | 1,1E-05 | 0,095  |
| V\$MZF1_02                           | -0,138 | 2E-04 | 1,1E-05 | 0,0951 |
| SMTTTTGT_UNKNOWN                     | -0,145 | 7E-05 | 1,1E-05 | 0,0952 |
| VART_KSHV_INFECTION_ANGIOGENIC_MARKE | -0,132 | 3E-04 | 1,1E-05 | 0,096  |
| RECEPTOR_BINDING                     | -0,138 | 2E-04 | 1,1E-05 | 0,097  |
| DCA_UP.V1_UP                         | -0,124 | 7E-04 | 1,1E-05 | 0,0972 |
| GSE30083_SP1_VS_SP4_THYMOCYTE_UP     | -0,153 | 3E-05 | 1,1E-05 | 0,0974 |
| BORLAK_LIVER_CANCER_EGF_UP           | -0,132 | 3E-04 | 1,1E-05 | 0,0975 |
| BIOCARTA_NGF_PATHWAY                 | -0,137 | 2E-04 | 1,1E-05 | 0,0983 |
| FUKUSHIMA_TNFSF11_TARGETS            | -0,143 | 9E-05 | 1,1E-05 | 0,0991 |
| PHOSPHORYLATION                      | -0,146 | 7E-05 | 1,1E-05 | 0,0992 |
| MACROMOLECULAR_COMPLEX_ASSEMBLY      | -0,139 | 1E-04 | 1,1E-05 | 0,0998 |
| CELL_DIVISION                        | -0,179 | 9E-07 | 1,1E-05 | 0,0999 |
| MODULE_176                           | -0,123 | 8E-04 | 1,1E-05 | 0,1002 |
| RGAANNTTC_V\$HSF1_01                 | -0,127 | 5E-04 | 1,1E-05 | 0,1004 |
| ADENYLATE_CYCLASE_ACTIVATION         | -0,117 | 0,001 | 1,1E-05 | 0,1007 |
| BILD_MYC_ONCOGENIC_SIGNATURE         | -0,167 | 5E-06 | 1,1E-05 | 0,1008 |
| HERNANDEZ_ABERRANT_MITOSIS_BY_DOCET, | -0,124 | 7E-04 | 1,1E-05 | 0,1011 |
| GNF2_RAB3A                           | -0,138 | 1E-04 | 1,1E-05 | 0,1014 |
| REACTOME_SIGNALING_BY_ERBB4          | -0,066 | 0,073 | 1,1E-05 | 0,1014 |
| GSE17721_CPG_VS_GARDIQUIMOD_24H_BMI  | -0,147 | 6E-05 | 1,2E-05 | 0,1023 |
| GSE13411_NAIVE_VS_MEMORY_BCELL_UP    | -0,126 | 6E-04 | 1,2E-05 | 0,103  |
| CHIARETTI_T_ALL_RELAPSE_PROGNOSIS    | -0,163 | 8E-06 | 1,2E-05 | 0,1031 |
| V\$SMAD3_Q6                          | -0,111 | 0,002 | 1,2E-05 | 0,1032 |
| SHETH_LIVER_CANCER_VS_TXNIP_LOSS_PAM | -0,151 | 3E-05 | 1,2E-05 | 0,1033 |
| MCBRYAN_PUBERTAL_BREAST_3_4WK_UP     | -0,154 | 2E-05 | 1,2E-05 | 0,1034 |
| GCM_CDH5                             | -0,144 | 8E-05 | 1,2E-05 | 0,1036 |
| WGTTNNNNNAAA_UNKNOWN                 | -0,112 | 0,002 | 1,2E-05 | 0,104  |
| CATION_TRANSPORT                     | -0,109 | 0,003 | 1,2E-05 | 0,1043 |
| BLUM_RESPONSE_TO_SALIRASIB_DN        | -0,166 | 5E-06 | 1,2E-05 | 0,1047 |
| GSE6269_E_COLI_VS_STREP_PNEUMO_INF_P | -0,117 | 0,001 | 1,2E-05 | 0,1051 |
| PENG_GLUCOSE_DEPRIVATION_DN          | -0,191 | 2E-07 | 1,2E-05 | 0,1051 |
| BANDRES_RESPONSE_TO_CARMUSTIN_WITHO  | -0,152 | 3E-05 | 1,2E-05 | 0,1054 |
| WANG_PROSTATE_CANCER_ANDROGEN_INDE   | -0,129 | 4E-04 | 1,2E-05 | 0,1062 |
| GSE17721_PAM3CSK4_VS_CPG_0.5H_BMDM   | -0,127 | 5E-04 | 1,2E-05 | 0,107  |
| V\$COMP1_01                          | -0,12  | 1E-03 | 1,2E-05 | 0,1071 |
| GSE15659_RESTING_TREG_VS_NONSUPPRES  | -0,135 | 2E-04 | 1,2E-05 | 0,1073 |
| MIKKELSEN_NPC_HCP_WITH_H3K4ME3_AND   | -0,131 | 3E-04 | 1,2E-05 | 0,1075 |
| GSE3982_NEUTROPHIL_VS_BCELL_DN       | -0,168 | 4E-06 | 1,2E-05 | 0,1075 |
| BIOCARTA_TRKA_PATHWAY                | -0,153 | 3E-05 | 1,2E-05 | 0,1088 |

|                                        |        |       |         |        |
|----------------------------------------|--------|-------|---------|--------|
| GSE12366_GC_VS_NAIVE_BCELL_UP          | -0,177 | 1E-06 | 1,2E-05 | 0,109  |
| GSE27786_LSK_VS_CD8_TCELL_UP           | -0,159 | 1E-05 | 1,2E-05 | 0,1096 |
| GSE24142_ADULT_VS_FETAL_EARLY_THYMI    | -0,193 | 1E-07 | 1,2E-05 | 0,11   |
| BUYTAERT_PHOTODYNAMIC_THERAPY_STRES    | -0,177 | 1E-06 | 1,2E-05 | 0,1101 |
| GSE22886_NAIVE_BCELL_VS_MONOCYTE_UF    | -0,153 | 3E-05 | 1,3E-05 | 0,1105 |
| ST_INTEGRIN_SIGNALING_PATHWAY          | -0,164 | 7E-06 | 1,3E-05 | 0,1106 |
| YAMASHITA_LIVER_CANCER_STEM_CELL_UP    | -0,137 | 2E-04 | 1,3E-05 | 0,1106 |
| KOKKINAKIS_METHIONINE_DEPRIVATION_48H  | -0,152 | 3E-05 | 1,3E-05 | 0,1112 |
| GSE6566_STRONG_VS_WEAK_DC_STIMULAT     | -0,155 | 2E-05 | 1,3E-05 | 0,1115 |
| PEART_HDAC_PROLIFERATION_CLUSTER_UP    | -0,157 | 2E-05 | 1,3E-05 | 0,1116 |
| SHI_SPARC_TARGETS_DN                   | -0,075 | 0,042 | 1,3E-05 | 0,1117 |
| CHIARETTI_ACUTE_LYMPHOBLASTIC_LEUKEMI  | -0,126 | 6E-04 | 1,3E-05 | 0,1132 |
| V\$AP1_C                               | -0,149 | 4E-05 | 1,3E-05 | 0,1134 |
| HOLLEMAN_PREDNISOLONE_RESISTANCE_ALL   | -0,18  | 7E-07 | 1,3E-05 | 0,1139 |
| AKT_UP.V1_DN                           | -0,103 | 0,005 | 1,3E-05 | 0,1143 |
| RICKMAN_HEAD_AND_NECK_CANCER_F         | -0,106 | 0,004 | 1,3E-05 | 0,1144 |
| GSE32423_MEMORY_VS_NAIVE_CD8_TCELL_    | -0,102 | 0,005 | 1,3E-05 | 0,1145 |
| BIOCARTA_IL4_PATHWAY                   | -0,121 | 9E-04 | 1,3E-05 | 0,1152 |
| POSITIVE_REGULATION_OF_CELL_PROLIFERA1 | -0,155 | 2E-05 | 1,3E-05 | 0,1156 |
| BECKER_TAMOXIFEN_RESISTANCE_DN         | -0,11  | 0,003 | 1,3E-05 | 0,1161 |
| KRAS.600_UP.V1_DN                      | -0,143 | 9E-05 | 1,3E-05 | 0,1162 |
| AACTTT_UNKNOWN                         | -0,125 | 6E-04 | 1,3E-05 | 0,1164 |
| ZHOU_CELL_CYCLE_GENES_IN_IR_RESPONSE_  | -0,175 | 2E-06 | 1,3E-05 | 0,1165 |
| MADAN_DPPA4_TARGETS                    | -0,151 | 4E-05 | 1,3E-05 | 0,1168 |
| GSE29615_DAY3_VS_DAY7_LAIV_FLU_VACI    | -0,157 | 2E-05 | 1,3E-05 | 0,1174 |
| IL2_UP.V1_DN                           | -0,112 | 0,002 | 1,3E-05 | 0,1179 |
| MRNA_BINDING                           | -0,177 | 1E-06 | 1,3E-05 | 0,1185 |
| YAO_TEMPORAL_RESPONSE_TO_PROGESTERC    | -0,192 | 1E-07 | 1,4E-05 | 0,1188 |
| GSE36392_EOSINOPHIL_VS_MAC_IL25_TREA   | -0,106 | 0,004 | 1,4E-05 | 0,1188 |
| SASAKI_ADULT_T_CELL_LEUKEMIA           | -0,175 | 1E-06 | 1,4E-05 | 0,1191 |
| HAHTOLA_MYCOSIS_FUNGOIDES_DN           | -0,112 | 0,002 | 1,4E-05 | 0,1191 |
| NOTCH_DN.V1_DN                         | -0,127 | 5E-04 | 1,4E-05 | 0,1192 |
| MATSUDA_NATURAL_KILLER_DIFFERENTIATIC  | -0,163 | 8E-06 | 1,4E-05 | 0,1199 |
| V\$NFKB_C                              | -0,138 | 2E-04 | 1,4E-05 | 0,1206 |
| STK33_DN                               | -0,15  | 4E-05 | 1,4E-05 | 0,121  |
| LI_CYTIDINE_ANALOGS_CYCTOTOXICITY      | -0,179 | 9E-07 | 1,4E-05 | 0,121  |
| CACTGTG,MIR-128A,MIR-128B              | -0,14  | 1E-04 | 1,4E-05 | 0,1215 |
| GSE360_HIGH_VS_LOW_DOSE_B_MALAYI_M,    | -0,103 | 0,005 | 1,4E-05 | 0,1217 |
| GCTNWTGK_UNKNOWN                       | -0,15  | 4E-05 | 1,4E-05 | 0,122  |
| KAECH_DAY15_EFF_VS_MEMORY_CD8_TCELI    | -0,138 | 2E-04 | 1,4E-05 | 0,122  |
| RNTCANNRNNYNATTW_UNKNOWN               | -0,119 | 0,001 | 1,4E-05 | 0,122  |
| V\$NFMUE1_Q6                           | -0,143 | 9E-05 | 1,4E-05 | 0,1225 |

|                                       |        |       |         |        |
|---------------------------------------|--------|-------|---------|--------|
| V\$SREBP_Q3                           | -0,12  | 0,001 | 1,4E-05 | 0,1228 |
| CASORELLI_ACUTE_PROMYELOCYTIC_LEUKEM  | -0,181 | 6E-07 | 1,4E-05 | 0,1229 |
| BRUINS_UVC_RESPONSE_VIA_TP53_GROUP_I  | -0,138 | 2E-04 | 1,4E-05 | 0,1231 |
| PID_BETACATENIN_NUC_PATHWAY           | -0,152 | 3E-05 | 1,4E-05 | 0,1233 |
| LEE_AGING_MUSCLE_UP                   | -0,088 | 0,016 | 1,4E-05 | 0,1236 |
| MORF_RAB3A                            | -0,097 | 0,008 | 1,4E-05 | 0,1237 |
| MODULE_48                             | -0,114 | 0,002 | 1,4E-05 | 0,1238 |
| XU_GH1_AUTOCRINE_TARGETS_DN           | -0,039 | 0,292 | 1,4E-05 | 0,1238 |
| CHROMATIN                             | -0,18  | 8E-07 | 1,4E-05 | 0,1247 |
| V\$CDPCR3HD_01                        | -0,102 | 0,005 | 1,4E-05 | 0,1247 |
| PANGAS_TUMOR_SUPPRESSION_BY_SMAD1_7   | -0,125 | 6E-04 | 1,4E-05 | 0,125  |
| V\$FOXO1_02                           | -0,131 | 4E-04 | 1,4E-05 | 0,1253 |
| HEPARIN_BINDING                       | -0,107 | 0,003 | 1,4E-05 | 0,126  |
| V\$NCX_01                             | -0,13  | 4E-04 | 1,4E-05 | 0,1262 |
| POS_RESPONSE_TO_HISTAMINE_UP          | -0,181 | 7E-07 | 1,4E-05 | 0,1265 |
| GSE32423_CTRL_VS_IL7_IL4_MEMORY_CD8_  | -0,148 | 5E-05 | 1,4E-05 | 0,1266 |
| RRAGTTGT_UNKNOWN                      | -0,123 | 8E-04 | 1,4E-05 | 0,1266 |
| SENESE_HDAC2_TARGETS_DN               | -0,142 | 1E-04 | 1,4E-05 | 0,1266 |
| REACTOME_G1_PHASE                     | -0,17  | 3E-06 | 1,4E-05 | 0,1267 |
| GSE27786_LSK_VS_NKTCELL_DN            | -0,155 | 2E-05 | 1,4E-05 | 0,1268 |
| SAMOLS_TARGETS_OF_KHSV_MIRNAS_UP      | -0,202 | 3E-08 | 1,4E-05 | 0,1269 |
| GSE360_T_GONDII_VS_B_MALAYI_HIGH_DOS  | -0,168 | 4E-06 | 1,4E-05 | 0,127  |
| LY_AGING_PREMATURE_DN                 | -0,174 | 2E-06 | 1,5E-05 | 0,1273 |
| PROTEIN_METABOLIC_PROCESS             | -0,15  | 4E-05 | 1,5E-05 | 0,1275 |
| GSE22045_TREG_VS_TCONV_DN             | -0,094 | 0,01  | 1,5E-05 | 0,1278 |
| MEISSNER_NPC_HCP_WITH_H3K4ME3_AND_I   | -0,134 | 2E-04 | 1,5E-05 | 0,128  |
| RESPONSE_TO_DNA_DAMAGE_STIMULUS       | -0,145 | 8E-05 | 1,5E-05 | 0,1281 |
| LU_AGING_BRAIN_UP                     | -0,126 | 6E-04 | 1,5E-05 | 0,1281 |
| NUCLEOPLASM_PART                      | -0,174 | 2E-06 | 1,5E-05 | 0,1282 |
| CELLULAR_MORPHOGENESIS_DURING_DIFFERE | -0,092 | 0,012 | 1,5E-05 | 0,1294 |
| GSE360_CTRL_VS_B_MALAYI_LOW_DOSE_DI   | -0,128 | 5E-04 | 1,5E-05 | 0,1296 |
| chr4q21                               | -0,164 | 6E-06 | 1,5E-05 | 0,1297 |
| YOSHIMURA_MAPK8_TARGETS_UP            | -0,109 | 0,003 | 1,5E-05 | 0,1308 |
| GCM_HMGA2                             | -0,134 | 2E-04 | 1,5E-05 | 0,1308 |
| GSE14769_UNSTIM_VS_20MIN_LPS_BMDM_L   | -0,116 | 0,002 | 1,5E-05 | 0,1318 |
| PATTERN_SPECIFICATION_PROCESS         | -0,12  | 0,001 | 1,5E-05 | 0,1319 |
| DOANE_RESPONSE_TO_ANDROGEN_DN         | -0,083 | 0,024 | 1,5E-05 | 0,1319 |
| ZHANG_GATA6_TARGETS_DN                | -0,168 | 4E-06 | 1,5E-05 | 0,1323 |
| GGCCAGT,MIR-193A,MIR-193B             | -0,116 | 0,001 | 1,5E-05 | 0,1326 |
| BURTON_ADIPOGENESIS_4                 | -0,162 | 9E-06 | 1,5E-05 | 0,1327 |
| GSE12845_IGD_POS_BLOOD_VS_PRE_GC_TC   | -0,09  | 0,014 | 1,5E-05 | 0,1332 |
| IVANOVA_HEMATOPOIESIS_STEM_CELL       | -0,103 | 0,005 | 1,5E-05 | 0,1333 |

|                                        |        |       |         |        |
|----------------------------------------|--------|-------|---------|--------|
| MRNA_METABOLIC_PROCESS                 | -0,188 | 2E-07 | 1,5E-05 | 0,1334 |
| PID_AURORA_A_PATHWAY                   | -0,165 | 6E-06 | 1,5E-05 | 0,1341 |
| chr11q22                               | -0,161 | 1E-05 | 1,5E-05 | 0,1344 |
| GSE12845_IGD_POS_VS_NEG_BLOOD_BCELL    | -0,121 | 1E-03 | 1,5E-05 | 0,1349 |
| SMID_BREAST_CANCER_RELAPSE_IN_BONE_C   | -0,167 | 5E-06 | 1,5E-05 | 0,135  |
| GSE19825_NAIVE_VS_DAY3_EFF_CD8_TCEL    | -0,118 | 0,001 | 1,6E-05 | 0,1355 |
| MORF_RBM8A                             | -0,083 | 0,024 | 1,6E-05 | 0,1358 |
| GSE11864_CSF1_VS_CSF1_PAM3CYS_IN_MA    | -0,177 | 1E-06 | 1,6E-05 | 0,1363 |
| GCM_PRKAG1                             | -0,115 | 0,002 | 1,6E-05 | 0,1369 |
| TTAYRTAA_V\$E4BP4_01                   | -0,122 | 9E-04 | 1,6E-05 | 0,137  |
| KOBAYASHI_EGFR_SIGNALING_24HR_DN       | -0,163 | 8E-06 | 1,6E-05 | 0,1375 |
| PRC2_SUZ12_UP.V1_DN                    | -0,134 | 2E-04 | 1,6E-05 | 0,1376 |
| GSE20715_0H_VS_6H_OZONE_LUNG_DN        | -0,142 | 1E-04 | 1,6E-05 | 0,1383 |
| V\$E4F1_Q6                             | -0,128 | 5E-04 | 1,6E-05 | 0,1384 |
| GRADE_COLON_AND_RECTAL_CANCER_DN       | -0,087 | 0,018 | 1,6E-05 | 0,1384 |
| LIANG_HEMATOPOIESIS_STEM_CELL_NUMBER   | -0,172 | 2E-06 | 1,6E-05 | 0,1386 |
| NIELSEN_MALIGNANT_FIBROUS_HISTIOCYTOMA | -0,083 | 0,024 | 1,6E-05 | 0,1389 |
| POSITIVE_REGULATION_OF_DEVELOPMENTAL   | -0,139 | 1E-04 | 1,6E-05 | 0,139  |
| PID_ERBB4_PATHWAY                      | -0,12  | 0,001 | 1,6E-05 | 0,1393 |
| LIAO_METASTASIS                        | -0,185 | 4E-07 | 1,6E-05 | 0,1396 |
| MODULE_382                             | -0,11  | 0,003 | 1,6E-05 | 0,1398 |
| GROSS_HYPOXIA_VIA_ELK3_UP              | -0,158 | 1E-05 | 1,6E-05 | 0,14   |
| REACTOME_P75NTR_RECRUITS_SIGNALLING_I  | -0,155 | 2E-05 | 1,6E-05 | 0,1402 |
| LABBE_WNT3A_TARGETS_UP                 | -0,177 | 1E-06 | 1,6E-05 | 0,1402 |
| MAGRANGEAS_MULTIPLE_MYELOMA_IGLL_VS    | -0,155 | 2E-05 | 1,6E-05 | 0,1403 |
| GSE15930_STIM_VS_STIM_AND_TRICHOSTA1   | -0,138 | 2E-04 | 1,6E-05 | 0,1404 |
| V\$SRY_01                              | -0,115 | 0,002 | 1,6E-05 | 0,1404 |
| chr12q                                 | -0,137 | 2E-04 | 1,6E-05 | 0,1404 |
| COLIN_PILOCYTIC_ASTROCYTOMA_VS_GLIOMI  | -0,149 | 5E-05 | 1,6E-05 | 0,1407 |
| TBK1.DN.48HRS_UP                       | -0,168 | 4E-06 | 1,6E-05 | 0,1418 |
| ALCALAY_AML_BY_NPM1_LOCALIZATION_DN    | -0,158 | 2E-05 | 1,6E-05 | 0,1421 |
| LOPEZ_MBD_TARGETS                      | -0,16  | 1E-05 | 1,6E-05 | 0,1423 |
| INSULIN_LIKE_GROWTH_FACTOR_RECEPTOR_   | -0,071 | 0,054 | 1,6E-05 | 0,1424 |
| V\$NFAT_Q4_01                          | -0,127 | 5E-04 | 1,6E-05 | 0,1431 |
| GOZGIT_ESR1_TARGETS_UP                 | -0,142 | 1E-04 | 1,6E-05 | 0,1434 |
| REGULATION_OF_CELL_GROWTH              | -0,117 | 0,001 | 1,7E-05 | 0,1438 |
| HAHTOLA_MYCOSIS_FUNGOIDES_SKIN_UP      | -0,115 | 0,002 | 1,7E-05 | 0,1438 |
| SCHAVOLT_TARGETS_OF_TP53_AND_TP63      | -0,177 | 1E-06 | 1,7E-05 | 0,1445 |
| GUO_HEX_TARGETS_UP                     | -0,133 | 3E-04 | 1,7E-05 | 0,1447 |
| ASTON_MAJOR_DEPRESSIVE_DISORDER_DN     | -0,145 | 7E-05 | 1,7E-05 | 0,1449 |
| GSE3982_EOSINOPHIL_VS_NKCELL_DN        | -0,134 | 2E-04 | 1,7E-05 | 0,1454 |
| GSE7852_LN_VS_THYMUS_TCONV_DN          | -0,17  | 3E-06 | 1,7E-05 | 0,1457 |

|                                       |        |       |         |        |
|---------------------------------------|--------|-------|---------|--------|
| DELACROIX_RAR_BOUND_ES                | -0,117 | 0,001 | 1,7E-05 | 0,1459 |
| DELYS_THYROID_CANCER_DN               | -0,093 | 0,011 | 1,7E-05 | 0,146  |
| CCCACAT,MIR-299-3P                    | -0,13  | 4E-04 | 1,7E-05 | 0,1464 |
| REGULATION_OF_RESPONSE_TO_EXTERNAL_!  | -0,145 | 7E-05 | 1,7E-05 | 0,1473 |
| KEGG_LYSINE_DEGRADATION               | -0,193 | 1E-07 | 1,7E-05 | 0,1474 |
| GSE13411_SWITCHED_MEMORY_BCELL_VS_F   | -0,161 | 1E-05 | 1,7E-05 | 0,1475 |
| GSE15659_CD45RA_NEG_CD4_TCELL_VS_RI   | -0,117 | 0,001 | 1,7E-05 | 0,1476 |
| VALK_AML_WITH_T_8_21_TRANSLOCATION    | -0,108 | 0,003 | 1,7E-05 | 0,1477 |
| GSE11057_NAIVE_CD4_VS_PBMC_CD4_TCEL   | -0,072 | 0,049 | 1,7E-05 | 0,1482 |
| GINESTIER_BREAST_CANCER_20Q13_AMPLIFI | -0,152 | 3E-05 | 1,7E-05 | 0,1491 |
| MODULE_192                            | -0,072 | 0,051 | 1,7E-05 | 0,1501 |
| MATZUK_MEIOTIC_AND_DNA_REPAIR         | -0,16  | 1E-05 | 1,7E-05 | 0,1502 |
| GSE3982_EOSINOPHIL_VS_DC_UP           | -0,133 | 3E-04 | 1,7E-05 | 0,1513 |
| SCHWAB_TARGETS_OF_BMYB_POLYMORPHIC.   | -0,108 | 0,003 | 1,7E-05 | 0,1517 |
| BRCA1_DN.V1_DN                        | -0,101 | 0,006 | 1,7E-05 | 0,152  |
| KRASNOSELSKAYA_ILF3_TARGETS_DN        | -0,161 | 1E-05 | 1,8E-05 | 0,1524 |
| V\$MEIS1_01                           | -0,134 | 2E-04 | 1,8E-05 | 0,1526 |
| LOPEZ_MESOTHELIOMA_SURVIVAL_WORST_V   | -0,164 | 7E-06 | 1,8E-05 | 0,1527 |
| MURAKAMI_UV_RESPONSE_24HR             | -0,134 | 2E-04 | 1,8E-05 | 0,1534 |
| NIKOLSKY_BREAST_CANCER_15Q26_AMPLICI  | -0,144 | 8E-05 | 1,8E-05 | 0,1543 |
| GSE29618_PRE_VS_DAY7_POST_LAIV_FLU_   | -0,125 | 7E-04 | 1,8E-05 | 0,1545 |
| MODULE_340                            | -0,136 | 2E-04 | 1,8E-05 | 0,1547 |
| WWTAAAGGC_UNKNOWN                     | -0,132 | 3E-04 | 1,8E-05 | 0,1554 |
| BAE_BRCA1_TARGETS_DN                  | -0,128 | 5E-04 | 1,8E-05 | 0,1556 |
| PROTEIN_DNA_COMPLEX_ASSEMBLY          | -0,176 | 1E-06 | 1,8E-05 | 0,1558 |
| V\$EV11_04                            | -0,106 | 0,004 | 1,8E-05 | 0,1559 |
| GSE14308_TH1_VS_INDUCED_TREG_DN       | -0,164 | 7E-06 | 1,8E-05 | 0,1561 |
| ANATOMICAL_STRUCTURE_DEVELOPMENT      | -0,139 | 1E-04 | 1,8E-05 | 0,1561 |
| GSE9006_TYPE_1_DIABETES_AT_DX_VS_4M   | -0,118 | 0,001 | 1,8E-05 | 0,1562 |
| V\$SRF_Q4                             | -0,126 | 6E-04 | 1,8E-05 | 0,1565 |
| V\$HP1SITEFACTOR_Q6                   | -0,134 | 3E-04 | 1,8E-05 | 0,1568 |
| GSE17721_POLYIC_VS_GARDIQUIMOD_1H_BM  | -0,139 | 1E-04 | 1,8E-05 | 0,157  |
| REGULATION_OF_MYELOID_CELL_DIFFERENTI | -0,125 | 6E-04 | 1,8E-05 | 0,1574 |
| GSE18791_CTRL_VS_NEWCASTLE_VIRUS_DC   | -0,185 | 3E-07 | 1,8E-05 | 0,1582 |
| V\$PPARA_01                           | -0,078 | 0,033 | 1,8E-05 | 0,1587 |
| GSE13485_PRE_VS_POST_YF17D_VACCINAT   | -0,156 | 2E-05 | 1,8E-05 | 0,1587 |
| SAMOLS_TARGETS_OF_KHSV_MIRNAS_DN      | -0,123 | 7E-04 | 1,9E-05 | 0,1608 |
| MODULE_308                            | -0,157 | 2E-05 | 1,9E-05 | 0,161  |
| GSE27786_LIN_NEG_VS_NKTCELL_UP        | -0,164 | 7E-06 | 1,9E-05 | 0,1611 |
| GSE27786_CD4_TCELL_VS_NKCELL_UP       | -0,093 | 0,011 | 1,9E-05 | 0,1622 |
| DCA_UP.V1_DN                          | -0,151 | 3E-05 | 1,9E-05 | 0,1629 |
| GSE360_CTRL_VS_L_MAJOR_MAC_DN         | -0,145 | 7E-05 | 1,9E-05 | 0,1629 |

|                                        |        |       |         |        |
|----------------------------------------|--------|-------|---------|--------|
| DARWICHE_SQUAMOUS_CELL_CARCINOMA_DI    | -0,142 | 1E-04 | 1,9E-05 | 0,1637 |
| ACAWNRNSRCGG_UNKNOWN                   | -0,112 | 0,002 | 1,9E-05 | 0,1654 |
| V\$ETF_Q6                              | -0,156 | 2E-05 | 1,9E-05 | 0,1655 |
| ESC_J1_UP_LATE.V1_UP                   | -0,119 | 0,001 | 1,9E-05 | 0,1656 |
| V\$ATF6_01                             | -0,084 | 0,022 | 1,9E-05 | 0,1656 |
| PID_EPHBFWDPATHWAY                     | -0,18  | 8E-07 | 1,9E-05 | 0,1674 |
| REACTOME_GPCR_DOWNSTREAM_SIGNALING     | -0,127 | 5E-04 | 1,9E-05 | 0,1674 |
| WYAAANNRNNNGCG_UNKNOWN                 | -0,12  | 0,001 | 1,9E-05 | 0,1676 |
| V\$HNF3_Q6                             | -0,105 | 0,004 | 1,9E-05 | 0,1686 |
| BIOCARTA_PGC1A_PATHWAY                 | -0,143 | 9E-05 | 2E-05   | 0,1688 |
| LINDGREN_BLADDER_CANCER_HIGH_RECURRE   | -0,148 | 5E-05 | 2E-05   | 0,169  |
| MODULE_131                             | -0,115 | 0,002 | 2E-05   | 0,1703 |
| PROTEINACEOUS_EXTRACELLULAR_MATRIX     | -0,122 | 9E-04 | 2E-05   | 0,1707 |
| MODULE_26                              | -0,156 | 2E-05 | 2E-05   | 0,1709 |
| YYCATTCAWW_UNKNOWN                     | -0,149 | 4E-05 | 2E-05   | 0,1709 |
| TRANSMISSION_OF_NERVE_IMPULSE          | -0,117 | 0,001 | 2E-05   | 0,1713 |
| MITOTIC_CELL_CYCLE_CHECKPOINT          | -0,164 | 7E-06 | 2E-05   | 0,1715 |
| TRANSCRIPTION_FACTOR_ACTIVITY          | -0,125 | 6E-04 | 2E-05   | 0,1718 |
| REACTOME_PIP3_ACTIVATES_AKT_SIGNALING  | -0,082 | 0,025 | 2E-05   | 0,1718 |
| GSE17721_CPG_VS_GARDIQUIMOD_12H_BMI    | -0,156 | 2E-05 | 2E-05   | 0,1719 |
| GAUSSMANN_MLL_AF4_FUSION_TARGETS_G     | -0,167 | 4E-06 | 2E-05   | 0,1723 |
| LINDGREN_BLADDER_CANCER_CLUSTER_1_D    | -0,168 | 4E-06 | 2E-05   | 0,1728 |
| V\$USF2_Q6                             | -0,144 | 8E-05 | 2E-05   | 0,1734 |
| POSITIVE_REGULATION_OF_TRANSCRIPTIONDI | -0,105 | 0,004 | 2E-05   | 0,1735 |
| WEBER_METHYLATED_IN_COLON_CANCER       | -0,095 | 0,01  | 2E-05   | 0,1736 |
| GUILLAUMOND_KLF10_TARGETS_UP           | -0,133 | 3E-04 | 2E-05   | 0,1739 |
| PROTEIN_POLYMERIZATION                 | -0,085 | 0,021 | 2E-05   | 0,1746 |
| MORF_CDC2L5                            | -0,083 | 0,023 | 2E-05   | 0,1747 |
| KUNINGER_IGF1_VS_PDGF_B_TARGETS_UP     | -0,117 | 0,001 | 2E-05   | 0,1749 |
| IWANAGA_CARCINOGENESIS_BY_KRAS_PTEN    | -0,157 | 2E-05 | 2E-05   | 0,175  |
| THEODOROU_MAMMARY_TUMORIGENESIS        | -0,094 | 0,011 | 2E-05   | 0,1755 |
| MASRI_RESISTANCE_TO_TAMOXIFEN_AND_AF   | -0,162 | 8E-06 | 2E-05   | 0,1755 |
| GATAAGR_V\$GATA_C                      | -0,117 | 0,001 | 2E-05   | 0,1759 |
| V\$PXR_Q2                              | -0,096 | 0,008 | 2E-05   | 0,1764 |
| BLALOCK_ALZHEIMERS_DISEASE_DN          | -0,167 | 4E-06 | 2E-05   | 0,1766 |
| GEISS_RESPONSE_TO_DSRNA_DN             | -0,199 | 4E-08 | 2,1E-05 | 0,1769 |
| ATGCTGG,MIR-338                        | -0,086 | 0,019 | 2,1E-05 | 0,177  |
| AAANWWTGC_UNKNOWN                      | -0,126 | 6E-04 | 2,1E-05 | 0,1772 |
| GSE10325_LUPUS_BCELL_VS_LUPUS_MYELO    | -0,163 | 8E-06 | 2,1E-05 | 0,1774 |
| YANG_BCL3_TARGETS_UP                   | -0,143 | 9E-05 | 2,1E-05 | 0,1776 |
| GSE1460_INTRATHYMIC_T_PROGENITOR_VS    | -0,172 | 2E-06 | 2,1E-05 | 0,1777 |
| KAECH_DAY8_EFF_VS_MEMORY_CD8_TCELL     | -0,092 | 0,012 | 2,1E-05 | 0,1781 |



|                                       |        |       |         |        |
|---------------------------------------|--------|-------|---------|--------|
| GSE14308_TH2_VS_NATURAL_TREG_UP       | -0,156 | 2E-05 | 2,1E-05 | 0,1782 |
| BIOCARTA_MAL_PATHWAY                  | -0,163 | 7E-06 | 2,1E-05 | 0,1783 |
| MUSCLE_DEVELOPMENT                    | -0,102 | 0,006 | 2,1E-05 | 0,1799 |
| RAO_BOUND_BY_SALL4_ISOFORM_B          | -0,152 | 3E-05 | 2,1E-05 | 0,1803 |
| GSE15930_STIM_VS_STIM_AND_IL-12_72H   | -0,117 | 0,001 | 2,1E-05 | 0,1803 |
| REACTOME_OPIOID_SIGNALLING            | -0,134 | 3E-04 | 2,1E-05 | 0,1807 |
| LE_NEURONAL_DIFFERENTIATION_DN        | -0,154 | 2E-05 | 2,1E-05 | 0,1809 |
| CTCCAAG,MIR-432                       | -0,111 | 0,002 | 2,1E-05 | 0,1813 |
| GSE29615_CTRL_VS_DAY7_LAIV_FLU_VACC   | -0,133 | 3E-04 | 2,1E-05 | 0,1816 |
| EXTRACELLULAR_MATRIX                  | -0,121 | 9E-04 | 2,1E-05 | 0,1816 |
| KEGG_MELANOGENESIS                    | -0,141 | 1E-04 | 2,1E-05 | 0,1817 |
| NAGY_STAGA_COMPONENTS_HUMAN           | -0,119 | 0,001 | 2,1E-05 | 0,1819 |
| PTEN_DN.V1_DN                         | -0,128 | 5E-04 | 2,1E-05 | 0,1821 |
| BOHN_PRIMARY_IMMUNODEFICIENCY_SYNDRO  | -0,171 | 3E-06 | 2,1E-05 | 0,1822 |
| POSITIVE_REGULATION_OF_DEFENSE_RESPON | -0,164 | 6E-06 | 2,2E-05 | 0,1852 |
| KEGG_THYROID_CANCER                   | -0,12  | 0,001 | 2,2E-05 | 0,1854 |
| PURBEY_TARGETS_OF_CTBP1_NOT_SATB1_L   | -0,146 | 6E-05 | 2,2E-05 | 0,1855 |
| MODULE_512                            | -0,109 | 0,003 | 2,2E-05 | 0,1893 |
| IONOTROPIC_Glutamate_Receptor_Activat | -0,07  | 0,056 | 2,2E-05 | 0,1894 |
| NUCLEAR_CHROMOSOME                    | -0,17  | 3E-06 | 2,2E-05 | 0,1896 |
| CAHOY_NEURONAL                        | -0,122 | 8E-04 | 2,2E-05 | 0,1897 |
| GSE27786_CD8_TCELL_VS_NEUTROPHIL_UP   | -0,177 | 1E-06 | 2,2E-05 | 0,1898 |
| GSE17721_LPS_VS_POLYIC_1H_BMDM_DN     | -0,132 | 3E-04 | 2,2E-05 | 0,1898 |
| GSE27786_BCELL_VS_MONO_MAC_DN         | -0,158 | 2E-05 | 2,2E-05 | 0,1903 |
| GSE17721_POLYIC_VS_PAM3CSK4_1H_BMDM   | -0,103 | 0,005 | 2,2E-05 | 0,1903 |
| GAGCCTG,MIR-484                       | -0,127 | 5E-04 | 2,2E-05 | 0,1908 |
| G_PROTEIN_SIGNALING_COUPLED_TO_CYCLIC | -0,117 | 0,001 | 2,2E-05 | 0,1908 |
| HADDAD_T_LYMPHOCYTE_AND_NK_PROGENI    | -0,102 | 0,006 | 2,2E-05 | 0,1908 |
| GSE31082_CD4_VS_CD8_SP_THYMOCYTE_D    | -0,153 | 3E-05 | 2,2E-05 | 0,191  |
| ZEMBUTSU_SENSITIVITY_TO_CYCLOPHOSPHAI | -0,081 | 0,027 | 2,2E-05 | 0,1913 |
| V\$GCM_Q2                             | -0,138 | 2E-04 | 2,2E-05 | 0,1918 |
| GSE22045_TREG_VS_TCONV_UP             | -0,166 | 5E-06 | 2,2E-05 | 0,1922 |
| V\$TATA_C                             | -0,105 | 0,004 | 2,2E-05 | 0,1923 |
| GSE29618_MONOCYTE_VS_MDC_DN           | -0,149 | 5E-05 | 2,2E-05 | 0,1926 |
| GSE22886_IL2_VS_IL15_STIM_NKCELL_DN   | -0,175 | 1E-06 | 2,2E-05 | 0,193  |
| CHIN_BREAST_CANCER_COPY_NUMBER_UP     | -0,188 | 2E-07 | 2,2E-05 | 0,193  |
| GCM_ERCC4                             | -0,113 | 0,002 | 2,3E-05 | 0,1941 |
| CELL_SURFACE_RECEPTOR_LINKED_SIGNAL_  | -0,12  | 0,001 | 2,3E-05 | 0,1953 |
| FEVR_CTNNB1_TARGETS_DN                | -0,176 | 1E-06 | 2,3E-05 | 0,1965 |
| ACTIN_FILAMENT_POLYMERIZATION         | -0,128 | 5E-04 | 2,3E-05 | 0,1969 |
| ACAACCT,MIR-453                       | -0,126 | 6E-04 | 2,3E-05 | 0,1971 |
| CTAWWWATA_V\$RSRFC4_Q2                | -0,1   | 0,007 | 2,3E-05 | 0,1974 |

|                                       |        |       |         |        |
|---------------------------------------|--------|-------|---------|--------|
| COLLER_MYC_TARGETS_DN                 | -0,14  | 1E-04 | 2,3E-05 | 0,2006 |
| V\$RSRFC4_Q2                          | -0,094 | 0,01  | 2,3E-05 | 0,2013 |
| GSE22886_IL2_VS_IL15_STIM_NKCELL_UP   | -0,12  | 0,001 | 2,4E-05 | 0,2017 |
| REGULATION_OF_DEVELOPMENTAL_PROCESS   | -0,141 | 1E-04 | 2,4E-05 | 0,2018 |
| CYCLIC_NUCLEOTIDE_MEDIATED_SIGNALING  | -0,114 | 0,002 | 2,4E-05 | 0,2023 |
| IWANAGA_CARCIINOGENESIS_BY_KRAS_DN    | -0,076 | 0,039 | 2,4E-05 | 0,2023 |
| GSE22886_NAIVE_CD4_TCELL_VS_MEMORY_   | -0,136 | 2E-04 | 2,4E-05 | 0,2025 |
| METAL_ION_TRANSMEMBRANE_TRANSPORTEI   | -0,103 | 0,005 | 2,4E-05 | 0,2028 |
| TRANSMEMBRANE_RECEPTOR_PROTEIN_TYRO   | -0,128 | 5E-04 | 2,4E-05 | 0,2029 |
| V\$HSF1_01                            | -0,113 | 0,002 | 2,4E-05 | 0,2038 |
| GGCNKCCATNK_UNKNOWN                   | -0,141 | 1E-04 | 2,4E-05 | 0,2039 |
| CAFFAREL_RESPONSE_TO_THC_DN           | -0,169 | 4E-06 | 2,4E-05 | 0,2041 |
| GCNP_SHH_UP_LATE.V1_UP                | -0,167 | 4E-06 | 2,4E-05 | 0,2043 |
| WEST_ADRENOCORTICAL_TUMOR_DN          | -0,073 | 0,047 | 2,4E-05 | 0,2047 |
| GSE3982_EOSINOPHIL_VS_BASOPHIL_DN     | -0,132 | 3E-04 | 2,4E-05 | 0,2054 |
| MODULE_320                            | -0,158 | 1E-05 | 2,4E-05 | 0,2057 |
| TTANWNANTGGM_UNKNOWN                  | -0,129 | 4E-04 | 2,4E-05 | 0,2077 |
| KEGG_OTHER_GLYCAN_DEGRADATION         | 0,171  | 3E-06 | 2,4E-05 | 0,2087 |
| GSE12845_IGD_NEG_BLOOD_VS_NAIVE_TON   | -0,111 | 0,002 | 2,4E-05 | 0,2091 |
| GSE30083_SP2_VS_SP3_THYMOCYTE_DN      | -0,094 | 0,011 | 2,4E-05 | 0,2095 |
| GSE17721_LPS_VS_POLYIC_0.5H_BMDM_UP   | -0,111 | 0,002 | 2,5E-05 | 0,2098 |
| STRUCTURAL_CONSTITUENT_OF_MUSCLE      | -0,126 | 6E-04 | 2,5E-05 | 0,2103 |
| HETEROPHILIC_CELL_ADHESION            | -0,139 | 1E-04 | 2,5E-05 | 0,2119 |
| BERTUCCI_INVASIVE_CARCIINOMA_DUCTAL_V | -0,087 | 0,018 | 2,5E-05 | 0,2127 |
| FERREIRA_EWINGS_SARCOMA_UNSTABLE_VS.  | -0,158 | 2E-05 | 2,5E-05 | 0,214  |
| GSE3982_DC_VS_BASOPHIL_DN             | -0,107 | 0,003 | 2,5E-05 | 0,2176 |
| GRABARCZYK_BCL11B_TARGETS_DN          | -0,139 | 1E-04 | 2,6E-05 | 0,2181 |
| MODULE_447                            | -0,145 | 7E-05 | 2,6E-05 | 0,2186 |
| V\$STAT_01                            | -0,127 | 5E-04 | 2,6E-05 | 0,2188 |
| STEROID_HORMONE_RECEPTOR_BINDING      | -0,144 | 8E-05 | 2,6E-05 | 0,2188 |
| REACTOME_SIGNALLING_TO_P38_VIA_RIT_AI | -0,165 | 6E-06 | 2,6E-05 | 0,2192 |
| GSE15659_NAIVE_CD4_TCELL_VS_RESTING_  | -0,132 | 3E-04 | 2,6E-05 | 0,2199 |
| GSE11057_NAIVE_VS_MEMORY_CD4_TCELL_   | -0,108 | 0,003 | 2,6E-05 | 0,2199 |
| GRESHOCK_CANCER_COPY_NUMBER_UP        | -0,159 | 1E-05 | 2,6E-05 | 0,2202 |
| RAY_TUMORIGENESIS_BY_ERBB2_CDC25A_UF  | -0,14  | 1E-04 | 2,6E-05 | 0,2211 |
| FLOTHO_PEDIATRIC_ALL_THERAPY_RESPONS  | -0,136 | 2E-04 | 2,6E-05 | 0,2211 |
| NOJIMA_SFRP2_TARGETS_UP               | -0,102 | 0,005 | 2,6E-05 | 0,2216 |
| WANG_LMO4_TARGETS_UP                  | -0,064 | 0,081 | 2,6E-05 | 0,2218 |
| V\$MYC_Q2                             | -0,155 | 2E-05 | 2,6E-05 | 0,222  |
| LEE_TARGETS_OF_PTCH1_AND_SUFU_DN      | -0,097 | 0,008 | 2,6E-05 | 0,2224 |
| V\$SOX5_01                            | -0,108 | 0,003 | 2,6E-05 | 0,2225 |
| TTANTCA_UNKNOWN                       | -0,137 | 2E-04 | 2,6E-05 | 0,2225 |

|                                       |        |       |         |        |
|---------------------------------------|--------|-------|---------|--------|
| REACTOME_G_ALPHA_S_SIGNALLING_EVENT:  | -0,086 | 0,019 | 2,6E-05 | 0,2232 |
| MOLENAAR_TARGETS_OF_CCND1_AND_CDK4    | -0,085 | 0,02  | 2,6E-05 | 0,2254 |
| ZWANG_CLASS_2_TRANSIENTLY_INDUCED_B   | -0,138 | 2E-04 | 2,6E-05 | 0,2255 |
| BIOCARTA_PLATELETAPP_PATHWAY          | -0,154 | 2E-05 | 2,7E-05 | 0,227  |
| MARIADASON_RESPONSE_TO_BUTYRATE_SUL   | -0,141 | 1E-04 | 2,7E-05 | 0,227  |
| V\$PR_01                              | -0,102 | 0,005 | 2,7E-05 | 0,228  |
| GSE15930_STIM_VS_STIM_AND_TRICHOSTA1  | -0,139 | 1E-04 | 2,7E-05 | 0,2283 |
| V\$ATF1_Q6                            | -0,111 | 0,003 | 2,7E-05 | 0,2289 |
| REGULATION_OF_CYCLIN_DEPENDENT_PROTE  | -0,159 | 1E-05 | 2,7E-05 | 0,229  |
| ZWANG_TRANSIENTLY_UP_BY_2ND_EGF_PUL   | -0,105 | 0,004 | 2,7E-05 | 0,2291 |
| V\$CREL_01                            | -0,145 | 8E-05 | 2,7E-05 | 0,231  |
| OHM_EMBRYONIC_CARCINOMA_UP            | -0,199 | 5E-08 | 2,7E-05 | 0,2314 |
| GSE27786_NEUTROPHIL_VS_MONO_MAC_DN    | -0,168 | 4E-06 | 2,7E-05 | 0,2314 |
| GSE360_HIGH_VS_LOW_DOSE_B_MALAYI_DC   | -0,109 | 0,003 | 2,7E-05 | 0,2314 |
| YKACATTT_UNKNOWN                      | -0,106 | 0,004 | 2,7E-05 | 0,2316 |
| AATGTGA,MIR-23A,MIR-23B               | -0,141 | 1E-04 | 2,7E-05 | 0,2327 |
| PHOTORECEPTOR_CELL_MAINTENANCE        | -0,131 | 3E-04 | 2,7E-05 | 0,2337 |
| GSE3982_BASOPHIL_VS_EFF_MEMORY_CD4_   | -0,13  | 4E-04 | 2,7E-05 | 0,2339 |
| V\$PAX_Q6                             | -0,101 | 0,006 | 2,8E-05 | 0,2345 |
| MODULE_175                            | -0,126 | 6E-04 | 2,8E-05 | 0,2347 |
| GSE13306_TREG_RA_VS_TCONV_RA_DN       | -0,114 | 0,002 | 2,8E-05 | 0,2363 |
| MODULE_244                            | -0,165 | 6E-06 | 2,8E-05 | 0,2374 |
| CHIARADONNA_NEOPLASTIC_TRANSFORMATI   | -0,15  | 4E-05 | 2,8E-05 | 0,2376 |
| MODULE_118                            | -0,175 | 2E-06 | 2,8E-05 | 0,2381 |
| GGCAGAC,MIR-346                       | -0,124 | 7E-04 | 2,8E-05 | 0,2381 |
| STEIN_ESRRA_TARGETS_RESPONSIVE_TO_ES  | -0,084 | 0,022 | 2,8E-05 | 0,2382 |
| KRAS.DF.V1_DN                         | -0,146 | 7E-05 | 2,8E-05 | 0,2383 |
| LEE_TARGETS_OF_PTCH1_AND_SUFU_UP      | -0,137 | 2E-04 | 2,8E-05 | 0,2385 |
| V\$LMO2COM_02                         | -0,114 | 0,002 | 2,8E-05 | 0,2385 |
| SYNAPTIC_TRANSMISSION                 | -0,113 | 0,002 | 2,8E-05 | 0,2386 |
| MORI_SMALL_PRE_BII_LYMPHOCYTE_UP      | -0,133 | 3E-04 | 2,8E-05 | 0,2387 |
| V\$OCT1_B                             | -0,113 | 0,002 | 2,8E-05 | 0,2395 |
| GSE17721_LPS_VS_PAM3CSK4_4H_BMDM_L    | -0,137 | 2E-04 | 2,8E-05 | 0,2418 |
| AAAYRNCTG_UNKNOWN                     | -0,105 | 0,004 | 2,9E-05 | 0,2423 |
| FOURNIER_ACINAR_DEVELOPMENT_LATE_2    | -0,172 | 2E-06 | 2,9E-05 | 0,2431 |
| BILANGES_SERUM_RESPONSE_TRANSLATION   | -0,132 | 3E-04 | 2,9E-05 | 0,2439 |
| PUJANA_BRCA2_PCC_NETWORK              | -0,16  | 1E-05 | 2,9E-05 | 0,2439 |
| GSE9037_CTRL_VS_LPS_1H_STIM_IRAK4_KC  | -0,078 | 0,032 | 2,9E-05 | 0,2441 |
| CAGTCAC,MIR-134                       | -0,121 | 9E-04 | 2,9E-05 | 0,2444 |
| V\$OCT1_Q5_01                         | -0,115 | 0,002 | 2,9E-05 | 0,2444 |
| POSITIVE_REGULATION_OF_RNA_METABOLIC_ | -0,105 | 0,004 | 2,9E-05 | 0,245  |
| MICROTUBULE_BINDING                   | -0,154 | 2E-05 | 2,9E-05 | 0,2459 |

|                                          |        |       |         |        |
|------------------------------------------|--------|-------|---------|--------|
| AMINO_ACID_DERIVATIVE_BIOSYNTHETIC_PRI   | -0,099 | 0,007 | 2,9E-05 | 0,2465 |
| BIOCARTA_P38MAPK_PATHWAY                 | -0,132 | 3E-04 | 2,9E-05 | 0,2465 |
| NIKOLSKY_BREAST_CANCER_7Q21_Q22_AMI      | -0,138 | 2E-04 | 2,9E-05 | 0,2469 |
| FRIDMAN_SENESCENCE_DN                    | -0,134 | 2E-04 | 2,9E-05 | 0,2474 |
| RESPONSE_TO_LIGHT_STIMULUS               | -0,119 | 0,001 | 2,9E-05 | 0,2477 |
| KANG_AR_TARGETS_UP                       | -0,154 | 2E-05 | 2,9E-05 | 0,249  |
| GSE30962_PRIMARY_VS_SECONDARY_ACUTE      | -0,155 | 2E-05 | 2,9E-05 | 0,2492 |
| MITOSIS                                  | -0,159 | 1E-05 | 2,9E-05 | 0,2502 |
| SODIUM_CHANNEL_ACTIVITY                  | -0,088 | 0,016 | 3E-05   | 0,2534 |
| LEE_NEURAL_CREST_STEM_CELL_UP            | -0,129 | 4E-04 | 3E-05   | 0,2546 |
| ORGAN_DEVELOPMENT                        | -0,139 | 1E-04 | 3E-05   | 0,2548 |
| CTACCTC,LET-7A,LET-7B,LET-7C,LET-7D,LET- | -0,134 | 2E-04 | 3E-05   | 0,2559 |
| SCHRAETS_MLL_TARGETS_UP                  | -0,13  | 4E-04 | 3E-05   | 0,2561 |
| REACTOME_SIGNALING_BY_RHO_GTPASES        | -0,126 | 6E-04 | 3E-05   | 0,2564 |
| GSE34205_HEALTHY_VS_FLU_INF_INFANT_P     | -0,098 | 0,007 | 3E-05   | 0,2566 |
| V\$TCF11_01                              | -0,11  | 0,003 | 3E-05   | 0,2575 |
| GSE36392_TYPE_2_MYELOID_VS_MAC_IL25      | -0,112 | 0,002 | 3E-05   | 0,258  |
| REGULATION_OF_CELL_PROLIFERATION         | -0,148 | 5E-05 | 3,1E-05 | 0,2585 |
| V\$GR_01                                 | -0,1   | 0,006 | 3,1E-05 | 0,2587 |
| YAGUE_PRETUMOR_DRUG_RESISTANCE_UP        | -0,135 | 2E-04 | 3,1E-05 | 0,2595 |
| GSE20715_0H_VS_24H_OZONE_TLR4_KO_L       | -0,113 | 0,002 | 3,1E-05 | 0,2641 |
| VERRECCHIA_RESPONSE_TO_TGFB1_C1          | -0,114 | 0,002 | 3,1E-05 | 0,2668 |
| GSE1460_DP_THYMOCYTE_VS_THYMIC_STRC      | -0,158 | 2E-05 | 3,2E-05 | 0,2669 |
| ATGGYGGA_UNKNOWN                         | -0,113 | 0,002 | 3,2E-05 | 0,2671 |
| KRAS.KIDNEY_UP.V1_UP                     | -0,104 | 0,005 | 3,2E-05 | 0,2681 |
| DORSEY_GAB2_TARGETS                      | -0,139 | 1E-04 | 3,2E-05 | 0,2684 |
| MARTIN_INTERACT_WITH_HDAC                | -0,126 | 6E-04 | 3,2E-05 | 0,2691 |
| CELL_PROJECTION                          | -0,093 | 0,011 | 3,2E-05 | 0,2692 |
| POMEROY_MEDULLOBLASTOMA_PROGNOSIS_I      | -0,168 | 4E-06 | 3,2E-05 | 0,2698 |
| RIZ_ERYTHROID_DIFFERENTIATION_APOBEC2    | -0,12  | 0,001 | 3,2E-05 | 0,2698 |
| GSE29615_CTRL_VS_DAY7_LAIV_FLU_VACC      | -0,123 | 8E-04 | 3,2E-05 | 0,2723 |
| V\$PAX4_04                               | -0,117 | 0,001 | 3,2E-05 | 0,2724 |
| GARGALOVIC_RESPONSE_TO_OXIDIZED_PHOS     | -0,139 | 1E-04 | 3,2E-05 | 0,2725 |
| GSE13484_UNSTIM_VS_12H_YF17D_VACCIN      | -0,093 | 0,011 | 3,2E-05 | 0,2726 |
| GSE22886_NAIVE_CD4_TCELL_VS_12H_ACT      | -0,066 | 0,071 | 3,3E-05 | 0,2756 |
| GSE360_L_DONOVANI_VS_L_MAJOR_MAC_D       | -0,134 | 3E-04 | 3,3E-05 | 0,2758 |
| MIKKELSEN_IPS_ICP_WITH_H3K4ME3_AND_H     | -0,104 | 0,004 | 3,3E-05 | 0,276  |
| ENGELMANN_CANCER_PROGENITORS_UP          | -0,078 | 0,033 | 3,3E-05 | 0,2762 |
| WEI_MIR34A_TARGETS                       | -0,136 | 2E-04 | 3,3E-05 | 0,2768 |
| MODULE_52                                | -0,185 | 4E-07 | 3,3E-05 | 0,277  |
| GSE3982_MAST_CELL_VS_MAC_UP              | -0,136 | 2E-04 | 3,3E-05 | 0,2777 |
| MODULE_485                               | -0,164 | 7E-06 | 3,3E-05 | 0,2783 |

|                                       |        |       |         |        |
|---------------------------------------|--------|-------|---------|--------|
| CTGAGCC,MIR-24                        | -0,103 | 0,005 | 3,3E-05 | 0,2807 |
| VARELA_ZMPSTE24_TARGETS_UP            | -0,066 | 0,07  | 3,3E-05 | 0,2817 |
| NERVOUS_SYSTEM_DEVELOPMENT            | -0,139 | 1E-04 | 3,3E-05 | 0,2819 |
| DING_LUNG_CANCER_MUTATED_RECURRENTL   | -0,16  | 1E-05 | 3,4E-05 | 0,2847 |
| KIM_MYCL1_AMPLIFICATION_TARGETS_UP    | -0,12  | 0,001 | 3,4E-05 | 0,2849 |
| MORF_RBBP8                            | -0,092 | 0,012 | 3,4E-05 | 0,2855 |
| GSE11924_TH1_VS_TH17_CD4_TCELL_UP     | -0,127 | 5E-04 | 3,4E-05 | 0,2871 |
| OHGUCHI_LIVER_HNF4A_TARGETS_UP        | -0,138 | 2E-04 | 3,4E-05 | 0,2874 |
| GSE32423_MEMORY_VS_NAIVE_CD8_TCELL_   | -0,128 | 5E-04 | 3,4E-05 | 0,2874 |
| V\$PBX1_02                            | -0,146 | 6E-05 | 3,4E-05 | 0,2876 |
| BIOCARTA_EPHA4_PATHWAY                | -0,17  | 3E-06 | 3,4E-05 | 0,2877 |
| KRIEG_HYPOXIA_NOT_VIA_KDM3A           | -0,174 | 2E-06 | 3,4E-05 | 0,288  |
| PROTEIN_AMINO_ACID_PHOSPHORYLATION    | -0,134 | 2E-04 | 3,4E-05 | 0,2892 |
| V\$PPAR_DR1_Q2                        | -0,097 | 0,008 | 3,4E-05 | 0,2894 |
| POTTI_CYTOXAN_SENSITIVITY             | -0,154 | 2E-05 | 3,4E-05 | 0,2902 |
| chr1q32                               | -0,134 | 3E-04 | 3,4E-05 | 0,2903 |
| JU_AGING_TERC_TARGETS_UP              | -0,135 | 2E-04 | 3,5E-05 | 0,2912 |
| REGULATION_OF_SYNAPSE_STRUCTURE_AND   | -0,16  | 1E-05 | 3,5E-05 | 0,2927 |
| GSE17721_POLYIC_VS_CPG_12H_BMDM_DN    | -0,172 | 2E-06 | 3,5E-05 | 0,2936 |
| WIEDERSCHAIN_TARGETS_OF_BMI1_AND_PC   | -0,169 | 3E-06 | 3,5E-05 | 0,2938 |
| CCTGAGT,MIR-510                       | -0,084 | 0,021 | 3,5E-05 | 0,2968 |
| TRANSFERASE_ACTIVITY_TRANSFERRING_PHC | -0,15  | 4E-05 | 3,5E-05 | 0,299  |
| POSITIVE_REGULATION_OF_TRANSCRIPTION  | -0,099 | 0,007 | 3,5E-05 | 0,299  |
| GSE27786_LSK_VS_LIN_NEG_CELL_UP       | -0,091 | 0,013 | 3,6E-05 | 0,3    |
| CHEBOTAEV_GR_TARGETS_DN               | -0,105 | 0,004 | 3,6E-05 | 0,3004 |
| SHETH_LIVER_CANCER_VS_TXNIP_LOSS_PAM  | -0,167 | 5E-06 | 3,6E-05 | 0,3011 |
| GENTILE_UV_RESPONSE_CLUSTER_D7        | -0,164 | 6E-06 | 3,6E-05 | 0,3022 |
| GSE15733_BM_VS_SPLEEN_MEMORY_CD4_T    | -0,141 | 1E-04 | 3,6E-05 | 0,3023 |
| PID_RAS_PATHWAY                       | -0,149 | 5E-05 | 3,6E-05 | 0,3035 |
| SENESE_HDAC1_AND_HDAC2_TARGETS_DN     | -0,141 | 1E-04 | 3,6E-05 | 0,3035 |
| GSE1460_INTRATHYMIC_T_PROGENITOR_VS_  | -0,129 | 4E-04 | 3,6E-05 | 0,3035 |
| V\$ZIC1_01                            | -0,115 | 0,002 | 3,6E-05 | 0,3044 |
| EBAUER_TARGETS_OF_PAX3_FOXO1_FUSION   | -0,106 | 0,004 | 3,6E-05 | 0,3053 |
| PEDERSEN_METASTASIS_BY_ERBB2_ISOFORM  | -0,109 | 0,003 | 3,6E-05 | 0,3062 |
| CASTELLANO_NRAS_TARGETS_DN            | -0,156 | 2E-05 | 3,6E-05 | 0,3067 |
| MICROTUBULE_ORGANIZING_CENTER_PART    | -0,137 | 2E-04 | 3,7E-05 | 0,3071 |
| GSE30083_SP3_VS_SP4_THYMOCYTE_UP      | -0,103 | 0,005 | 3,7E-05 | 0,3084 |
| BRUINS_UVC_RESPONSE_VIA_TP53_GROUP_   | -0,106 | 0,004 | 3,7E-05 | 0,3086 |
| GROSS_HYPOXIA_VIA_ELK3_ONLY_DN        | -0,132 | 3E-04 | 3,7E-05 | 0,309  |
| MARSON_BOUND_BY_E2F4_UNSTIMULATED     | -0,157 | 2E-05 | 3,7E-05 | 0,31   |
| CELL_MIGRATION                        | -0,136 | 2E-04 | 3,7E-05 | 0,3103 |
| GSE17721_POLYIC_VS_PAM3CSK4_24H_BMI   | -0,173 | 2E-06 | 3,7E-05 | 0,3106 |

|                                        |        |       |         |        |
|----------------------------------------|--------|-------|---------|--------|
| REACTOME_ARMS_MEDIATED_ACTIVATION      | -0,169 | 3E-06 | 3,7E-05 | 0,3112 |
| GGCKCATGS_UNKNOWN                      | -0,079 | 0,031 | 3,7E-05 | 0,3118 |
| DELASERNA_MYOD_TARGETS_UP              | -0,086 | 0,018 | 3,7E-05 | 0,3118 |
| GSE3982_MAC_VS_NKCELL_DN               | -0,103 | 0,005 | 3,7E-05 | 0,3118 |
| ENZYME_ACTIVATOR_ACTIVITY              | -0,118 | 0,001 | 3,7E-05 | 0,312  |
| GSE27786_BCELL_VS_NEUTROPHIL_DN        | -0,112 | 0,002 | 3,7E-05 | 0,3131 |
| AGTCTTA,MIR-499                        | -0,147 | 6E-05 | 3,7E-05 | 0,314  |
| MORF_PRKCA                             | -0,136 | 2E-04 | 3,7E-05 | 0,3147 |
| GSE18791_CTRL_VS_NEWCASTLE_VIRUS_DC    | -0,172 | 2E-06 | 3,7E-05 | 0,3148 |
| HYDROLASE_ACTIVITY_ACTING_ON_ACID_AN   | -0,117 | 0,001 | 3,8E-05 | 0,3164 |
| SENESE_HDAC1_TARGETS_DN                | -0,1   | 0,006 | 3,8E-05 | 0,3166 |
| MARTORIATI_MDM4_TARGETS_NEUROEPITHEL   | -0,158 | 1E-05 | 3,8E-05 | 0,3184 |
| V\$AP4_01                              | -0,111 | 0,002 | 3,8E-05 | 0,3195 |
| RORIE_TARGETS_OF_EWSR1_FLI1_FUSION_DI  | -0,139 | 1E-04 | 3,8E-05 | 0,3195 |
| INTEGRIN_BINDING                       | -0,133 | 3E-04 | 3,8E-05 | 0,3201 |
| REACTOME_NCAM_SIGNALING_FOR_NEURITE_   | -0,132 | 3E-04 | 3,8E-05 | 0,3208 |
| YTATTTTNR_V\$MEF2_02                   | -0,113 | 0,002 | 3,8E-05 | 0,3211 |
| AMIT_SERUM_RESPONSE_120_MCF10A         | -0,135 | 2E-04 | 3,8E-05 | 0,3212 |
| ESC_V6.5_UP_LATE.V1_UP                 | -0,107 | 0,003 | 3,8E-05 | 0,3217 |
| M_PHASE_OF_MITOTIC_CELL_CYCLE          | -0,158 | 2E-05 | 3,9E-05 | 0,3235 |
| MODULE_123                             | -0,139 | 1E-04 | 3,9E-05 | 0,3248 |
| WANG_METHYLATED_IN_BREAST_CANCER       | -0,175 | 2E-06 | 3,9E-05 | 0,3249 |
| TGTTTGY_V\$HNF3_Q6                     | -0,086 | 0,019 | 3,9E-05 | 0,3257 |
| GSE24634_IL4_VS_CTRL_TREATED_NAIVE_C   | -0,158 | 2E-05 | 3,9E-05 | 0,3266 |
| PUJANA_ATM_PCC_NETWORK                 | -0,163 | 8E-06 | 3,9E-05 | 0,3272 |
| BIOCARTA_SALMONELLA_PATHWAY            | -0,19  | 2E-07 | 3,9E-05 | 0,3278 |
| LANDIS_ERBB2_BREAST_TUMORS_65_DN       | -0,114 | 0,002 | 3,9E-05 | 0,3281 |
| BIOCARTA_CARDIACEGF_PATHWAY            | -0,106 | 0,004 | 3,9E-05 | 0,3283 |
| GSE3982_DC_VS_CENT_MEMORY_CD4_TCEL     | -0,11  | 0,003 | 3,9E-05 | 0,3283 |
| MODULE_164                             | -0,14  | 1E-04 | 3,9E-05 | 0,3286 |
| GSE3982_BASOPHIL_VS_NKCELL_UP          | -0,116 | 0,002 | 3,9E-05 | 0,33   |
| GSE11864_CSF1_PAM3CYS_VS_CSF1_IFNG_    | -0,16  | 1E-05 | 3,9E-05 | 0,3304 |
| GSE17721_CTRL_VS_CPG_2H_BMDM_DN        | -0,114 | 0,002 | 3,9E-05 | 0,3304 |
| BIOCARTA_RAC1_PATHWAY                  | -0,164 | 7E-06 | 4E-05   | 0,3312 |
| HARRIS_BRAIN_CANCER_PROGENITORS        | -0,128 | 5E-04 | 4E-05   | 0,3312 |
| HEIDENBLAD_AMPLIFIED_IN_SOFT_TISSUE_CA | -0,085 | 0,02  | 4E-05   | 0,3314 |
| MORF_DMPK                              | -0,153 | 3E-05 | 4E-05   | 0,3325 |
| MODULE_9                               | -0,095 | 0,01  | 4E-05   | 0,335  |
| PID_NEPHRIN_NEPH1_PATHWAY              | -0,137 | 2E-04 | 4E-05   | 0,3355 |
| ODONNELL_METASTASIS_UP                 | -0,095 | 0,009 | 4E-05   | 0,3365 |
| CELL_MATRIX_ADHESION                   | -0,116 | 0,001 | 4E-05   | 0,3373 |
| DASU_IL6_SIGNALING_SCAR_UP             | -0,147 | 6E-05 | 4E-05   | 0,3374 |

|                                      |        |       |         |        |
|--------------------------------------|--------|-------|---------|--------|
| DITTMER_PTHLH_TARGETS_UP             | -0,169 | 3E-06 | 4E-05   | 0,3384 |
| FRIDMAN_IMMORTALIZATION_DN           | -0,123 | 7E-04 | 4E-05   | 0,3386 |
| ATF2_S_UP.V1_UP                      | -0,157 | 2E-05 | 4,1E-05 | 0,3388 |
| V\$NFKAPPAB65_01                     | -0,142 | 1E-04 | 4,1E-05 | 0,3388 |
| KYNG_DNA_DAMAGE_BY_4NQO_OR_UV        | -0,135 | 2E-04 | 4,1E-05 | 0,3391 |
| SCHUETZ_BREAST_CANCER_DUCTAL_INVASI  | -0,032 | 0,379 | 4,1E-05 | 0,3396 |
| BROWNE_HCMV_INFECTION_12HR_DN        | -0,15  | 4E-05 | 4,1E-05 | 0,3406 |
| V\$AP2_Q3                            | -0,131 | 3E-04 | 4,1E-05 | 0,3406 |
| TOMLINS_PROSTATE_CANCER_DN           | -0,118 | 0,001 | 4,1E-05 | 0,3406 |
| GSE15659_TREG_VS_TCONV_UP            | -0,124 | 7E-04 | 4,1E-05 | 0,3414 |
| MORF_BRCA1                           | -0,16  | 1E-05 | 4,1E-05 | 0,3416 |
| PROVENZANI_METASTASIS_UP             | -0,163 | 8E-06 | 4,1E-05 | 0,3419 |
| AGCGCAG,MIR-191                      | -0,042 | 0,256 | 4,1E-05 | 0,3423 |
| KEGG_WNT_SIGNALING_PATHWAY           | -0,146 | 6E-05 | 4,1E-05 | 0,3429 |
| V\$CHOP_01                           | -0,122 | 9E-04 | 4,1E-05 | 0,3439 |
| V\$PAX4_02                           | -0,109 | 0,003 | 4,1E-05 | 0,3439 |
| V\$DBP_Q6                            | -0,101 | 0,006 | 4,1E-05 | 0,3445 |
| VOLTAGE_GATED_SODIUM_CHANNEL_ACTIVI  | -0,07  | 0,057 | 4,1E-05 | 0,3445 |
| TGANTCA_V\$AP1_C                     | -0,141 | 1E-04 | 4,1E-05 | 0,346  |
| REACTOME_NEURONAL_SYSTEM             | -0,113 | 0,002 | 4,2E-05 | 0,3469 |
| ATGCAGT,MIR-217                      | -0,134 | 2E-04 | 4,2E-05 | 0,3473 |
| TISSUE_DEVELOPMENT                   | -0,162 | 9E-06 | 4,2E-05 | 0,3493 |
| MATTHEWS_AP1_TARGETS                 | -0,148 | 5E-05 | 4,2E-05 | 0,3501 |
| KIM_WT1_TARGETS_UP                   | -0,15  | 4E-05 | 4,2E-05 | 0,3509 |
| MTOR_UP.V1_DN                        | -0,096 | 0,009 | 4,2E-05 | 0,3511 |
| chr9p13                              | -0,136 | 2E-04 | 4,2E-05 | 0,3514 |
| GSE6269_HEALTHY_VS_FLU_INF_PBMC_UP   | -0,103 | 0,005 | 4,2E-05 | 0,3515 |
| HEDENFALK_BREAST_CANCER_HEREDITARY_1 | -0,185 | 4E-07 | 4,2E-05 | 0,3525 |
| GSE27786_NKCELL_VS_NEUTROPHIL_UP     | -0,162 | 9E-06 | 4,2E-05 | 0,3527 |
| GSE28237_FOLLICULAR_VS_LATE_GC_BCELL | -0,149 | 4E-05 | 4,2E-05 | 0,3532 |
| REACTOME_PROLONGED_ERK_ACTIVATION_E  | -0,157 | 2E-05 | 4,2E-05 | 0,3538 |
| GGATTA_V\$PITX2_Q2                   | -0,112 | 0,002 | 4,2E-05 | 0,3538 |
| GSE17721_CTRL_VS_GARDIQUIMOD_1H_BMC  | -0,157 | 2E-05 | 4,3E-05 | 0,3546 |
| GSE8515_CTRL_VS_IL6_4H_STIM_MAC_DN   | -0,097 | 0,008 | 4,3E-05 | 0,3552 |
| AMIT_EGF_RESPONSE_240_HELA           | -0,169 | 3E-06 | 4,3E-05 | 0,3562 |
| PUJANA_BREAST_CANCER_WITH_BRCA1_MU   | -0,155 | 2E-05 | 4,3E-05 | 0,3562 |
| GSE27786_LIN_NEG_VS_CD4_TCELL_UP     | -0,182 | 6E-07 | 4,3E-05 | 0,3563 |
| V\$AFP1_Q6                           | -0,107 | 0,003 | 4,3E-05 | 0,3563 |
| REACTOME_GASTRIN_CREB_SIGNALLING_PAT | -0,125 | 6E-04 | 4,3E-05 | 0,3578 |
| GSE3982_EFF_MEMORY_CD4_TCELL_VS_NK   | -0,125 | 6E-04 | 4,3E-05 | 0,358  |
| CAGCCTC,MIR-485-5P                   | -0,097 | 0,008 | 4,3E-05 | 0,3582 |
| KEGG_PROGESTERONE_MEDIATED_OOCYTE_M  | -0,151 | 3E-05 | 4,3E-05 | 0,359  |

|                                        |        |       |         |        |
|----------------------------------------|--------|-------|---------|--------|
| LIM_MAMMARY_LUMINAL_PROGENITOR_DN      | -0,114 | 0,002 | 4,3E-05 | 0,3592 |
| BYSTRYKH_HEMATOPOIESIS_STEM_CELL_FGF   | -0,172 | 2E-06 | 4,3E-05 | 0,3609 |
| YATGNWAAT_V\$OCT_C                     | -0,1   | 0,006 | 4,3E-05 | 0,3611 |
| V\$HFH4_01                             | -0,108 | 0,003 | 4,3E-05 | 0,3611 |
| WATTEL_AUTONOMOUS_THYROID_ADENOMA      | -0,143 | 9E-05 | 4,3E-05 | 0,3612 |
| REACTOME_NOTCH1_INTRACELLULAR_DOMAI    | -0,138 | 2E-04 | 4,3E-05 | 0,3616 |
| GSE22886_NAIVE_VS_IGM_MEMORY_BCELL_    | -0,096 | 0,009 | 4,4E-05 | 0,3621 |
| PLASARI_TGFB1_SIGNALING_VIA_NFIC_1HR_  | -0,092 | 0,012 | 4,4E-05 | 0,365  |
| GSE8515_CTRL_VS_IL1_4H_STIM_MAC_UP     | -0,084 | 0,022 | 4,4E-05 | 0,366  |
| GSE15659_TREG_VS_TCONV_DN              | -0,101 | 0,006 | 4,4E-05 | 0,3684 |
| BILANGES_SERUM_SENSITIVE_GENES         | -0,115 | 0,002 | 4,4E-05 | 0,3689 |
| KIM_WT1_TARGETS_DN                     | -0,17  | 3E-06 | 4,4E-05 | 0,369  |
| DAIRKEE_CANCER_PRONE_RESPONSE_BPA_E2   | -0,159 | 1E-05 | 4,4E-05 | 0,3692 |
| GSE2706_LPS_VS_R848_AND_LPS_8H_STIM    | -0,136 | 2E-04 | 4,4E-05 | 0,3692 |
| KEGG_RENAL_CELL_CARCINOMA              | -0,145 | 7E-05 | 4,5E-05 | 0,3701 |
| HELLEBREKERS_SILENCED_DURING_TUMOR_A   | -0,146 | 6E-05 | 4,5E-05 | 0,3705 |
| GAVIN_FOXP3_TARGETS_CLUSTER_P7         | -0,121 | 1E-03 | 4,5E-05 | 0,3708 |
| GSE13411_NAIVE_VS_IGM_MEMORY_BCELL_    | -0,137 | 2E-04 | 4,5E-05 | 0,3716 |
| CAATGCA,MIR-33                         | -0,151 | 4E-05 | 4,5E-05 | 0,3717 |
| CHICAS_RB1_TARGETS_CONFLUENT           | -0,132 | 3E-04 | 4,5E-05 | 0,3724 |
| GSE36476_YOUNG_VS_OLD_DONOR_MEMOR      | -0,153 | 3E-05 | 4,5E-05 | 0,3724 |
| AUXILIARY_TRANSPORT_PROTEIN_ACTIVITY   | -0,08  | 0,03  | 4,5E-05 | 0,3765 |
| GSE17721_POLYIC_VS_CPG_16H_BMDM_DN     | -0,17  | 3E-06 | 4,5E-05 | 0,3769 |
| BHATTACHARYA_EMBRYONIC_STEM_CELL       | -0,17  | 3E-06 | 4,5E-05 | 0,3769 |
| REACTOME_SPRY_REGULATION_OF_FGF_SIGN   | -0,164 | 7E-06 | 4,5E-05 | 0,3772 |
| GSE7460_CTRL_VS_TGFB_TREATED_ACT_TF    | -0,171 | 3E-06 | 4,6E-05 | 0,3785 |
| GSE27786_LSK_VS_ERYTHROBLAST_DN        | -0,104 | 0,004 | 4,6E-05 | 0,3794 |
| NIKOLSKY_MUTATED_AND_AMPLIFIED_IN_BRI  | -0,096 | 0,009 | 4,6E-05 | 0,3827 |
| HEIDENBLAD_AMPLIFIED_IN_PANCREATIC_CAI | -0,171 | 3E-06 | 4,6E-05 | 0,3828 |
| GSE13306_RA_VS_UNTREATED_TREG_DN       | -0,1   | 0,006 | 4,6E-05 | 0,3836 |
| GNF2_RBBP6                             | -0,164 | 7E-06 | 4,7E-05 | 0,386  |
| MODULE_8                               | -0,181 | 7E-07 | 4,7E-05 | 0,3862 |
| POSITIVE_REGULATION_OF_TRANSCRIPTION_I | -0,107 | 0,003 | 4,7E-05 | 0,3863 |
| DELACROIX_RAR_TARGETS_DN               | -0,135 | 2E-04 | 4,7E-05 | 0,3866 |
| AFFAR_YY1_TARGETS_DN                   | -0,173 | 2E-06 | 4,7E-05 | 0,388  |
| MORF_MAGEA8                            | -0,129 | 4E-04 | 4,7E-05 | 0,3888 |
| SWEET_LUNG_CANCER_KRAS_DN              | -0,102 | 0,005 | 4,7E-05 | 0,3901 |
| GSE20715_WT_VS_TLR4_KO_48H_OZONE_L     | -0,092 | 0,012 | 4,7E-05 | 0,3906 |
| KEGG_OOCYTE_MEIOSIS                    | -0,155 | 2E-05 | 4,7E-05 | 0,3908 |
| DNA_RECOMBINATION                      | -0,15  | 4E-05 | 4,7E-05 | 0,391  |
| GSE17721_LPS_VS_PAM3CSK4_0.5H_BMDM     | -0,134 | 2E-04 | 4,7E-05 | 0,3924 |
| GSE27786_LSK_VS_ERYTHROBLAST_UP        | -0,107 | 0,003 | 4,8E-05 | 0,3941 |



|                                       |        |       |         |        |
|---------------------------------------|--------|-------|---------|--------|
| GSE8384_CTRL_VS_B_ABORTUS_4H_MAC_C    | -0,133 | 3E-04 | 4,8E-05 | 0,3954 |
| CHEN_HOXA5_TARGETS_6HR_UP             | -0,132 | 3E-04 | 4,8E-05 | 0,3998 |
| POST_TRANSLATIONAL_PROTEIN_MODIFICATI | -0,14  | 1E-04 | 4,8E-05 | 0,3999 |
| REGULATION_OF_GROWTH                  | -0,105 | 0,004 | 4,8E-05 | 0,3999 |
| GSE20366_EX_VIVO_VS_HOMEOSTATIC_CON   | -0,131 | 4E-04 | 4,8E-05 | 0,4004 |
| BIOCARTA_INTRINSIC_PATHWAY            | -0,13  | 4E-04 | 4,8E-05 | 0,4011 |
| JNK_DN.V1_DN                          | -0,118 | 0,001 | 4,9E-05 | 0,4034 |
| KIM_WT1_TARGETS_12HR_UP               | -0,123 | 8E-04 | 4,9E-05 | 0,404  |
| RAPA_EARLY_UP.V1_DN                   | -0,128 | 4E-04 | 4,9E-05 | 0,4044 |
| V\$USF_02                             | -0,092 | 0,012 | 4,9E-05 | 0,406  |
| BMI1_DN.V1_DN                         | -0,083 | 0,023 | 4,9E-05 | 0,4061 |
| PTEN_DN.V2_DN                         | -0,107 | 0,004 | 4,9E-05 | 0,4063 |
| LASTOWSKA_NEUROBLASTOMA_COPY_NUMB     | -0,129 | 4E-04 | 4,9E-05 | 0,4076 |
| GSE14026_TH1_VS_TH17_UP               | -0,137 | 2E-04 | 5E-05   | 0,41   |
| PETROVA_PROX1_TARGETS_UP              | -0,16  | 1E-05 | 5E-05   | 0,413  |
| MODULE_252                            | -0,162 | 9E-06 | 5E-05   | 0,4134 |
| chr4q22                               | -0,101 | 0,006 | 5E-05   | 0,414  |
| RESPONSE_TO_ABIOTIC_STIMULUS          | -0,141 | 1E-04 | 5E-05   | 0,416  |
| MORF_PAX7                             | -0,113 | 0,002 | 5,1E-05 | 0,418  |
| V\$CEBP_C                             | -0,129 | 4E-04 | 5,1E-05 | 0,4187 |
| V\$SREBP1_Q6                          | -0,092 | 0,012 | 5,1E-05 | 0,4209 |
| GSE17721_LPS_VS_POLYIC_6H_BMDM_UP     | -0,151 | 3E-05 | 5,1E-05 | 0,4222 |
| GAUSSMANN_MLL_AF4_FUSION_TARGETS_C.   | -0,115 | 0,002 | 5,1E-05 | 0,4232 |
| COLLIS_PRKDC_SUBSTRATES               | -0,165 | 6E-06 | 5,2E-05 | 0,4257 |
| VEGF_A_UP.V1_DN                       | -0,18  | 7E-07 | 5,2E-05 | 0,428  |
| COLLAGEN_BINDING                      | -0,124 | 7E-04 | 5,2E-05 | 0,4283 |
| V\$STAT1_02                           | -0,137 | 2E-04 | 5,2E-05 | 0,4309 |
| MORF_TNFRSF25                         | -0,104 | 0,005 | 5,2E-05 | 0,4309 |
| GNF2_APEX1                            | -0,167 | 4E-06 | 5,2E-05 | 0,4313 |
| HU_GENOTOXIN_ACTION_DIRECT_VS_INDIREC | -0,115 | 0,002 | 5,2E-05 | 0,4314 |
| CHROMOSOME                            | -0,157 | 2E-05 | 5,2E-05 | 0,4325 |
| ST_WNT_BETA_CATENIN_PATHWAY           | -0,118 | 0,001 | 5,2E-05 | 0,4328 |
| SNACANNYSYAGA_UNKNOWN                 | -0,097 | 0,008 | 5,3E-05 | 0,4336 |
| DAIRKEE_CANCER_PRONE_RESPONSE_E2      | -0,116 | 0,001 | 5,3E-05 | 0,4367 |
| GSE22886_NAIVE_TCELL_VS_NEUTROPHIL_U  | -0,172 | 2E-06 | 5,3E-05 | 0,4392 |
| MISSIAGLIA_REGULATED_BY_METHYLATION_I | -0,148 | 5E-05 | 5,3E-05 | 0,4392 |
| MORF_TNFRSF6                          | -0,122 | 8E-04 | 5,3E-05 | 0,4392 |
| WEINMANN_ADAPTATION_TO_HYPOXIA_UP     | -0,151 | 3E-05 | 5,3E-05 | 0,4396 |
| JEON_SMAD6_TARGETS_UP                 | -0,16  | 1E-05 | 5,3E-05 | 0,4405 |
| NEGATIVE_REGULATION_OF_CELL_PROLIFERA | -0,143 | 9E-05 | 5,3E-05 | 0,4407 |
| GSE36476_YOUNG_VS_OLD_DONOR_MEMOR     | -0,119 | 0,001 | 5,4E-05 | 0,4418 |
| SNF5_DN.V1_DN                         | -0,121 | 9E-04 | 5,4E-05 | 0,4423 |

|                                       |        |       |         |        |
|---------------------------------------|--------|-------|---------|--------|
| GSE15659_RESTING_VS_ACTIVATED_TREG_U  | -0,112 | 0,002 | 5,4E-05 | 0,443  |
| VALK_AML_CLUSTER_10                   | -0,044 | 0,234 | 5,4E-05 | 0,4439 |
| MORF_PSMF1                            | -0,122 | 8E-04 | 5,4E-05 | 0,4455 |
| PHOSPHOPROTEIN_PHOSPHATASE_ACTIVITY   | -0,117 | 0,001 | 5,4E-05 | 0,4455 |
| REACTOME_COLLAGEN_FORMATION           | -0,145 | 7E-05 | 5,4E-05 | 0,4457 |
| TONKS_TARGETS_OF_RUNX1_RUNX1T1_FUSI   | -0,126 | 6E-04 | 5,4E-05 | 0,4472 |
| GSE1448_CTRL_VS_ANTI_VBETA5_DP_THYM   | -0,135 | 2E-04 | 5,4E-05 | 0,4476 |
| LEE_DOUBLE_POLAR_THYMOCYTE            | -0,097 | 0,008 | 5,4E-05 | 0,4476 |
| NUTT_GBM_VS_AO_GLIOMA_DN              | -0,103 | 0,005 | 5,4E-05 | 0,4476 |
| V\$CIZ_01                             | -0,128 | 5E-04 | 5,4E-05 | 0,4484 |
| GSE15659_RESTING_TREG_VS_NONSUPPRES   | -0,156 | 2E-05 | 5,5E-05 | 0,4497 |
| ROVERSI_GLIOMA_LOH_REGIONS            | -0,143 | 9E-05 | 5,5E-05 | 0,4497 |
| V\$FXR_Q3                             | -0,1   | 0,006 | 5,5E-05 | 0,4512 |
| DNA_PACKAGING                         | -0,159 | 1E-05 | 5,5E-05 | 0,4528 |
| EXTRACELLULAR_MATRIX_PART             | -0,126 | 5E-04 | 5,5E-05 | 0,4529 |
| ACCAAAG,MIR-9                         | -0,125 | 6E-04 | 5,5E-05 | 0,4543 |
| GSE360_T_GONDII_VS_B_MALAYI_HIGH_DOS  | -0,133 | 3E-04 | 5,5E-05 | 0,4554 |
| HEIDENBLAD_AMPLICON_12P11_12_UP       | -0,097 | 0,008 | 5,6E-05 | 0,4564 |
| BAKKER_FOXO3_TARGETS_DN               | -0,13  | 4E-04 | 5,6E-05 | 0,4577 |
| MILICIC_FAMILIAL_ADENOMATOUS_POLYPOSI | -0,116 | 0,001 | 5,6E-05 | 0,4589 |
| GSE27786_LSK_VS_NEUTROPHIL_UP         | -0,116 | 0,002 | 5,6E-05 | 0,46   |
| LI_CISPLATIN_RESISTANCE_DN            | -0,136 | 2E-04 | 5,6E-05 | 0,4621 |
| TTGCWCAAY_V\$CEBPB_02                 | -0,159 | 1E-05 | 5,6E-05 | 0,4628 |
| PEDERSEN_METASTASIS_BY_ERBB2_ISOFORM  | -0,14  | 1E-04 | 5,7E-05 | 0,4657 |
| CHANNEL_REGULATOR_ACTIVITY            | -0,091 | 0,013 | 5,7E-05 | 0,4667 |
| KIM_WT1_TARGETS_8HR_UP                | -0,146 | 6E-05 | 5,7E-05 | 0,4706 |
| GSE12845_IGD_NEG_BLOOD_VS_PRE_GC_TC   | -0,171 | 3E-06 | 5,7E-05 | 0,4708 |
| GSE14350_TREG_VS_TEFF_DN              | -0,128 | 5E-04 | 5,7E-05 | 0,4713 |
| GSE2706_R848_VS_LPS_8H_STIM_DC_UP     | -0,074 | 0,044 | 5,8E-05 | 0,4731 |
| MODY_HIPPOCAMPUS_PRENATAL             | -0,151 | 3E-05 | 5,8E-05 | 0,4743 |
| GSE360_L_MAJOR_VS_B_MALAYI_LOW_DOS    | -0,125 | 6E-04 | 5,8E-05 | 0,4752 |
| G_PROTEIN_SIGNALING_COUPLED_TO_IP3_SE | -0,12  | 0,001 | 5,8E-05 | 0,4755 |
| V\$SP1_Q6_01                          | -0,128 | 4E-04 | 5,8E-05 | 0,4771 |
| BYSTRYKH_HEMATOPOIESIS_STEM_CELL_SCP  | -0,047 | 0,195 | 5,8E-05 | 0,4775 |
| JIANG_TIP30_TARGETS_UP                | -0,16  | 1E-05 | 5,8E-05 | 0,478  |
| BIOCARTA_CELLCYCLE_PATHWAY            | -0,162 | 9E-06 | 5,9E-05 | 0,4806 |
| PID_LYSOPHOSPHOLIPID_PATHWAY          | -0,107 | 0,004 | 5,9E-05 | 0,4811 |
| GSE360_T_GONDII_VS_M_TUBERCULOSIS_DC  | -0,129 | 4E-04 | 5,9E-05 | 0,485  |
| PID_INTEGRIN1_PATHWAY                 | -0,139 | 1E-04 | 5,9E-05 | 0,4851 |
| GSE11057_NAIVE_VS_CENT_MEMORY_CD4_    | -0,102 | 0,005 | 5,9E-05 | 0,4867 |
| MODULE_2                              | -0,102 | 0,005 | 5,9E-05 | 0,487  |
| BAKER_HEMATOPOIESIS_STAT3_TARGETS     | -0,163 | 8E-06 | 6E-05   | 0,4896 |

|                                       |        |       |         |        |
|---------------------------------------|--------|-------|---------|--------|
| REACTOME_EXTRACELLULAR_MATRIX_ORGAN   | -0,143 | 9E-05 | 6E-05   | 0,492  |
| MESODERM_DEVELOPMENT                  | -0,112 | 0,002 | 6E-05   | 0,4923 |
| GCM_FANCC                             | -0,13  | 4E-04 | 6E-05   | 0,4943 |
| MCCLUNG_CREB1_TARGETS_UP              | -0,139 | 1E-04 | 6E-05   | 0,4952 |
| BURTON_ADIPOGENESIS_PEAK_AT_2HR       | -0,111 | 0,002 | 6,1E-05 | 0,4992 |
| POSITIVE_REGULATION_OF_CELLULAR_METAB | -0,108 | 0,003 | 6,1E-05 | 0,4992 |
| BILD_SRC_ONCOGENIC_SIGNATURE          | -0,142 | 1E-04 | 6,1E-05 | 0,4994 |
| PID_THROMBIN_PAR1_PATHWAY             | -0,12  | 0,001 | 6,1E-05 | 0,4995 |
| GSE14350_IL2RB_KO_VS_WT_TEFF_DN       | -0,141 | 1E-04 | 6,1E-05 | 0,5032 |
| KEGG_GNRH_SIGNALING_PATHWAY           | -0,093 | 0,011 | 6,2E-05 | 0,5037 |
| PYROPHOSPHATASE_ACTIVITY              | -0,112 | 0,002 | 6,2E-05 | 0,5045 |
| GSE7852_TREG_VS_TCONV_LN_DN           | -0,122 | 8E-04 | 6,2E-05 | 0,5059 |
| V\$OCT1_07                            | -0,112 | 0,002 | 6,2E-05 | 0,5059 |
| KRAS.BREAST_UP.V1_UP                  | -0,147 | 6E-05 | 6,2E-05 | 0,5085 |
| GCAAAAA,MIR-129                       | -0,128 | 5E-04 | 6,2E-05 | 0,5102 |
| GSE19825_NAIVE_VS_IL2RALOW_DAY3_EFF   | -0,156 | 2E-05 | 6,2E-05 | 0,5105 |
| NIKOLSKY_BREAST_CANCER_17Q21_Q25_A    | -0,11  | 0,003 | 6,3E-05 | 0,5129 |
| GSE17721_POLYIC_VS_GARDIQUIMOD_24H_I  | -0,119 | 0,001 | 6,3E-05 | 0,5136 |
| GSE17721_PAM3CSK4_VS_GADIQUIMOD_24H   | -0,14  | 1E-04 | 6,3E-05 | 0,5138 |
| CTCAGGG,MIR-125B,MIR-125A             | -0,099 | 0,007 | 6,3E-05 | 0,5138 |
| WHITEFORD_PEDIATRIC_CANCER_MARKERS    | -0,151 | 3E-05 | 6,3E-05 | 0,5147 |
| GROSS_ELK3_TARGETS_UP                 | -0,111 | 0,002 | 6,3E-05 | 0,5147 |
| GSE30083_SP2_VS_SP4_THYMOCYTE_UP      | -0,116 | 0,002 | 6,3E-05 | 0,515  |
| POSITIVE_REGULATION_OF_CELLULAR_PROCE | -0,131 | 3E-04 | 6,3E-05 | 0,5169 |
| INTERMEDIATE_FILAMENT                 | -0,155 | 2E-05 | 6,3E-05 | 0,5173 |
| INTERMEDIATE_FILAMENT_CYTOSKELETON    | -0,155 | 2E-05 | 6,3E-05 | 0,5173 |
| MORF_CTSB                             | -0,15  | 4E-05 | 6,3E-05 | 0,5176 |
| AMUNDSON_POOR_SURVIVAL_AFTER_GAMMA    | -0,143 | 9E-05 | 6,3E-05 | 0,5177 |
| STANELLE_E2F1_TARGETS                 | -0,131 | 3E-04 | 6,3E-05 | 0,5184 |
| GSE15324_NAIVE_VS_ACTIVATED_ELF4_KO   | -0,087 | 0,017 | 6,4E-05 | 0,5186 |
| LIN_NPAS4_TARGETS_DN                  | -0,09  | 0,014 | 6,4E-05 | 0,5189 |
| GSE17721_POLYIC_VS_GARDIQUIMOD_1H_BM  | -0,15  | 4E-05 | 6,4E-05 | 0,52   |
| MORF_THRA                             | -0,144 | 8E-05 | 6,4E-05 | 0,5205 |
| SILIGAN_BOUND_BY_EWS_FLT1_FUSION      | -0,072 | 0,05  | 6,4E-05 | 0,5223 |
| TTGTAG,MIR-520D                       | -0,117 | 0,001 | 6,4E-05 | 0,5227 |
| MORF_RAD51L3                          | -0,116 | 0,002 | 6,4E-05 | 0,5241 |
| GENTILE_UV_HIGH_DOSE_DN               | -0,166 | 5E-06 | 6,4E-05 | 0,5255 |
| GSE17974_CTRL_VS_ACT_IL4_AND_ANTI_IL  | -0,099 | 0,007 | 6,5E-05 | 0,5269 |
| V\$HNF6_Q6                            | -0,113 | 0,002 | 6,5E-05 | 0,5274 |
| LEF1_UP.V1_UP                         | -0,142 | 1E-04 | 6,5E-05 | 0,5275 |
| YGCANTGCR_UNKNOWN                     | -0,104 | 0,005 | 6,5E-05 | 0,5275 |
| MODULE_183                            | -0,167 | 5E-06 | 6,5E-05 | 0,529  |

|                                       |        |       |         |        |
|---------------------------------------|--------|-------|---------|--------|
| GSE3982_BCELL_VS_BASOPHIL_UP          | -0,126 | 5E-04 | 6,5E-05 | 0,529  |
| GAL_LEUKEMIC_STEM_CELL_UP             | -0,114 | 0,002 | 6,5E-05 | 0,5295 |
| REACTOME_PLC_BETA_MEDIATED_EVENTS     | -0,11  | 0,003 | 6,5E-05 | 0,5304 |
| WANG_CISPLATIN_RESPONSE_AND_XPC_DN    | -0,107 | 0,003 | 6,5E-05 | 0,5324 |
| MITOTIC_SPINDLE_ORGANIZATION_AND_BIOG | -0,159 | 1E-05 | 6,5E-05 | 0,5334 |
| V\$COUP_DR1_Q6                        | -0,083 | 0,023 | 6,6E-05 | 0,5339 |
| TIEN_INTESTINE_PROBIOTICS_6HR_UP      | -0,155 | 2E-05 | 6,6E-05 | 0,5343 |
| V\$FOXJ2_02                           | -0,104 | 0,005 | 6,6E-05 | 0,5344 |
| KRAS.600.LUNG.BREAST_UP.V1_DN         | -0,128 | 5E-04 | 6,6E-05 | 0,5353 |
| YNGTTNNNATT_UNKNOWN                   | -0,115 | 0,002 | 6,6E-05 | 0,5384 |
| POSITIVE_REGULATION_OF_METABOLIC_PROC | -0,109 | 0,003 | 6,6E-05 | 0,5385 |
| GSE24142_ADULT_VS_FETAL_DN3_THYMOG    | -0,116 | 0,002 | 6,6E-05 | 0,5385 |
| V\$EGR_Q6                             | -0,118 | 0,001 | 6,6E-05 | 0,5388 |
| V\$ARP1_01                            | -0,087 | 0,017 | 6,6E-05 | 0,5391 |
| GLUCOSE_METABOLIC_PROCESS             | -0,143 | 9E-05 | 6,6E-05 | 0,5407 |
| BYSTRYKH_HEMATOPOIESIS_STEM_CELL_QTL  | -0,109 | 0,003 | 6,6E-05 | 0,5411 |
| BROWNE_HCMV_INFECTION_18HR_DN         | -0,1   | 0,006 | 6,7E-05 | 0,5413 |
| GSE3982_CTRL_VS_LPS_48H_DC_UP         | -0,097 | 0,008 | 6,7E-05 | 0,5413 |
| V\$ZIC3_01                            | -0,12  | 0,001 | 6,7E-05 | 0,5422 |
| LABBE_TARGETS_OF_TGFB1_AND_WNT3A_L    | -0,163 | 8E-06 | 6,7E-05 | 0,5425 |
| BOYALT_LIVER_CANCER_SUBCLASS_G6_UP    | -0,126 | 6E-04 | 6,7E-05 | 0,5425 |
| GSE7852_THYMUS_VS_FAT_TCONV_UP        | -0,145 | 7E-05 | 6,7E-05 | 0,5488 |
| GSE20366_EX_VIVO_VS_DEC205_CONVERSI   | -0,11  | 0,003 | 6,8E-05 | 0,5504 |
| CARBOHYDRATE_BIOSYNTHETIC_PROCESS     | -0,132 | 3E-04 | 6,8E-05 | 0,553  |
| SMID_BREAST_CANCER_RELAPSE_IN_BRAIN_I | -0,159 | 1E-05 | 6,8E-05 | 0,5547 |
| GSE17721_PAM3CSK4_VS_CPG_6H_BMDM_I    | -0,134 | 2E-04 | 6,8E-05 | 0,5558 |
| YAO_TEMPORAL_RESPONSE_TO_PROGESTERC   | -0,076 | 0,037 | 6,9E-05 | 0,5568 |
| GSE3982_DC_VS_BCELL_DN                | -0,128 | 4E-04 | 6,9E-05 | 0,5569 |
| BERTUCCI_MEDULLARY_VS_DUCTAL_BREAST   | -0,113 | 0,002 | 6,9E-05 | 0,5586 |
| KEGG_BIOSYNTHESIS_OF_UNSATURATED_FA1  | -0,149 | 5E-05 | 6,9E-05 | 0,5601 |
| GSE15930_STIM_VS_STIM_AND_IL-12_24H_  | -0,115 | 0,002 | 6,9E-05 | 0,5611 |
| GSE2826_XID_VS_BTK_KO_BCELL_UP        | -0,136 | 2E-04 | 6,9E-05 | 0,5645 |
| ENK_UV_RESPONSE_EPIDERMIS_DN          | -0,139 | 1E-04 | 7E-05   | 0,5649 |
| GGNRMNNYCAT_UNKNOWN                   | -0,06  | 0,102 | 7E-05   | 0,5651 |
| GSE3982_NEUTROPHIL_VS_BASOPHIL_DN     | -0,14  | 1E-04 | 7E-05   | 0,5654 |
| KRAS.600.LUNG.BREAST_UP.V1_UP         | -0,125 | 6E-04 | 7E-05   | 0,5676 |
| EPIDERMIS_DEVELOPMENT                 | -0,165 | 6E-06 | 7E-05   | 0,568  |
| REACTOME_ACTIVATION_OF_NMDA_RECEPTC   | -0,111 | 0,002 | 7E-05   | 0,5702 |
| MATZUK_CENTRAL_FOR_FEMALE_FERTILITY   | -0,093 | 0,011 | 7E-05   | 0,5702 |
| AAACCAC,MIR-140                       | -0,147 | 6E-05 | 7E-05   | 0,5707 |
| WNT_UP.V1_UP                          | -0,101 | 0,006 | 7E-05   | 0,5707 |
| SASAI_RESISTANCE_TO NEOPLASTIC_TRANSI | -0,115 | 0,002 | 7E-05   | 0,571  |

|                                       |        |       |         |        |
|---------------------------------------|--------|-------|---------|--------|
| PRC2_EZH2_UP.V1_DN                    | -0,144 | 8E-05 | 7E-05   | 0,5712 |
| GSE15659_RESTING_VS_ACTIVATED_TREG_I  | -0,165 | 6E-06 | 7E-05   | 0,5716 |
| SMID_BREAST_CANCER_LUMINAL_A_DN       | -0,158 | 1E-05 | 7,1E-05 | 0,5722 |
| BOQUEST_STEM_CELL_UP                  | -0,091 | 0,013 | 7,1E-05 | 0,5723 |
| CYCLIN_D1_KE.V1_DN                    | -0,113 | 0,002 | 7,1E-05 | 0,5732 |
| PID_AJDISS_2PATHWAY                   | -0,123 | 7E-04 | 7,1E-05 | 0,5738 |
| V\$TBP_01                             | -0,099 | 0,007 | 7,1E-05 | 0,5752 |
| GSE15750_DAY6_VS_DAY10_TRAF6KO_EFF.   | -0,071 | 0,054 | 7,1E-05 | 0,5782 |
| MURAKAMI_UV_RESPONSE_6HR_DN           | -0,142 | 1E-04 | 7,1E-05 | 0,5794 |
| GSE29618_PRE_VS_DAY7_POST_LAIV_FLU_   | -0,102 | 0,005 | 7,3E-05 | 0,5889 |
| REPRODUCTION                          | -0,118 | 0,001 | 7,3E-05 | 0,5896 |
| PID_SYNDECAN_2_PATHWAY                | -0,155 | 2E-05 | 7,3E-05 | 0,5902 |
| KIM_WT1_TARGETS_8HR_DN                | -0,123 | 8E-04 | 7,3E-05 | 0,5906 |
| ESC_V6.5_UP_EARLY.V1_DN               | -0,125 | 6E-04 | 7,3E-05 | 0,5913 |
| GSE22886_NAIVE_TCELL_VS_DC_UP         | -0,102 | 0,006 | 7,3E-05 | 0,5943 |
| GRAESSMANN_APOPTOSIS_BY_DOXORUBICIN_  | -0,155 | 2E-05 | 7,3E-05 | 0,5949 |
| GARCIA_TARGETS_OF_FLI1_AND_DAX1_DN    | -0,159 | 1E-05 | 7,4E-05 | 0,5976 |
| TRANSMEMBRANE_RECEPTOR_PROTEIN_KINAS  | -0,115 | 0,002 | 7,4E-05 | 0,5976 |
| ANATOMICAL_STRUCTURE_MORPHOGENESIS    | -0,116 | 0,001 | 7,4E-05 | 0,5988 |
| REACTOME_G_ALPHA_Q_SIGNALLING_EVENT   | -0,114 | 0,002 | 7,4E-05 | 0,5988 |
| V\$YY1_01                             | -0,113 | 0,002 | 7,4E-05 | 0,5998 |
| GSE14026_TH1_VS_TH17_DN               | -0,131 | 3E-04 | 7,4E-05 | 0,6014 |
| MCBRYAN_TERMINAL_END_BUD_UP           | -0,152 | 3E-05 | 7,4E-05 | 0,6023 |
| V\$MEF2_Q6_01                         | -0,116 | 0,001 | 7,4E-05 | 0,6025 |
| KEGG_MELANOMA                         | -0,143 | 9E-05 | 7,5E-05 | 0,6044 |
| NEUROLOGICAL_SYSTEM_PROCESS           | -0,118 | 0,001 | 7,5E-05 | 0,6044 |
| ROSS_AML_WITH_PML_RARA_FUSION         | -0,115 | 0,002 | 7,5E-05 | 0,6044 |
| BOYLAN_MULTIPLE_MYELOMA_D_UP          | -0,114 | 0,002 | 7,5E-05 | 0,6053 |
| V\$EGR2_01                            | -0,112 | 0,002 | 7,5E-05 | 0,6072 |
| GSE32423_IL7_VS_IL4_MEMORY_CD8_TCELL  | -0,15  | 4E-05 | 7,5E-05 | 0,6075 |
| GSE17974_IL4_AND_ANTI_IL12_VS_UNTREA  | -0,131 | 3E-04 | 7,5E-05 | 0,6079 |
| CELL_SUBSTRATE_ADHESION               | -0,109 | 0,003 | 7,5E-05 | 0,6099 |
| CELL_CELL_SIGNALING                   | -0,12  | 0,001 | 7,6E-05 | 0,6122 |
| MORF_MT4                              | -0,096 | 0,008 | 7,6E-05 | 0,6133 |
| PROTEIN_KINASE_ACTIVITY               | -0,142 | 1E-04 | 7,6E-05 | 0,6146 |
| GSE10094_LCMV_VS_LISTERIA_IND_EFF_CD. | -0,112 | 0,002 | 7,6E-05 | 0,6149 |
| GSE14308_TH2_VS_NATURAL_TREG_DN       | -0,065 | 0,077 | 7,6E-05 | 0,6151 |
| GSE29618_MONOCYTE_VS_PDC_DAY7_FLU_    | -0,131 | 3E-04 | 7,6E-05 | 0,6171 |
| GSE17721_CTRL_VS_LPS_12H_BMDM_DN      | -0,146 | 6E-05 | 7,6E-05 | 0,6175 |
| WTGAAAT_UNKNOWN                       | -0,114 | 0,002 | 7,7E-05 | 0,6176 |
| PHONG_TNF_RESPONSE_VIA_P38_PARTIAL    | -0,148 | 5E-05 | 7,7E-05 | 0,6182 |
| REACTOME_G_ALPHA_Z_SIGNALLING_EVENT:  | -0,105 | 0,004 | 7,7E-05 | 0,6212 |

|                                        |        |       |         |        |
|----------------------------------------|--------|-------|---------|--------|
| RAPA_EARLY_UP.V1_UP                    | -0,098 | 0,007 | 7,7E-05 | 0,6221 |
| GSE17721_LPS_VS_CPG_1H_BMDM_UP         | -0,168 | 4E-06 | 7,7E-05 | 0,6226 |
| REACTOME_NRF1_SIGNALS_CELL_DEATH_FRC   | -0,09  | 0,014 | 7,8E-05 | 0,6259 |
| V\$FOXO3_01                            | -0,103 | 0,005 | 7,8E-05 | 0,6302 |
| GTACAGG,MIR-486                        | -0,126 | 6E-04 | 7,8E-05 | 0,6307 |
| GSE36476_YOUNG_VS_OLD_DONOR_MEMOR      | -0,102 | 0,005 | 7,8E-05 | 0,6308 |
| V\$MYC_MAX_03                          | -0,138 | 2E-04 | 7,8E-05 | 0,6326 |
| BRIDAU_IMPRINTED_GENES                 | -0,118 | 0,001 | 7,8E-05 | 0,6329 |
| GGCAGCT,MIR-22                         | -0,137 | 2E-04 | 7,9E-05 | 0,633  |
| GSE17721_CTRL_VS_LPS_24H_BMDM_DN       | -0,153 | 3E-05 | 7,9E-05 | 0,6347 |
| MODULE_372                             | -0,165 | 6E-06 | 7,9E-05 | 0,6348 |
| chr1p35                                | -0,124 | 7E-04 | 7,9E-05 | 0,6375 |
| V\$STAT4_01                            | -0,086 | 0,019 | 7,9E-05 | 0,6385 |
| ZHENG_RESPONSE_TO_ARSENITE_DN          | -0,166 | 5E-06 | 8E-05   | 0,641  |
| NOUSHMEHR_GBM_SILENCED_BY_METHYLATI    | -0,141 | 1E-04 | 8E-05   | 0,6411 |
| CALVET_IRINOTECAN_SENSITIVE_VS_RESISTA | -0,126 | 5E-04 | 8E-05   | 0,6425 |
| MAINA_VHL_TARGETS_UP                   | -0,13  | 4E-04 | 8E-05   | 0,6426 |
| GSE17721_LPS_VS_GARDIQUIMOD_4H_BMDM    | -0,122 | 9E-04 | 8E-05   | 0,6438 |
| HOFMANN_MYELODYSPLASTIC_SYNDROM_LO     | -0,137 | 2E-04 | 8E-05   | 0,6445 |
| GSE36392_MAC_VS_NEUTROPHIL_IL25_TRE/   | -0,053 | 0,152 | 8E-05   | 0,6445 |
| DEPHOSPHORYLATION                      | -0,098 | 0,007 | 8E-05   | 0,6447 |
| GSE360_L_MAJOR_VS_B_MALAYI_HIGH_DOS    | -0,11  | 0,003 | 8E-05   | 0,6462 |
| GSE17721_CTRL_VS_GARDIQUIMOD_0.5H_BI   | -0,135 | 2E-04 | 8E-05   | 0,6471 |
| KORKOLA_YOLK_SAC_TUMOR_UP              | -0,16  | 1E-05 | 8,1E-05 | 0,6481 |
| V\$HMX1_01                             | -0,086 | 0,018 | 8,1E-05 | 0,6493 |
| GSE29614_CTRL_VS_DAY7_TIV_FLU_VACCI    | -0,166 | 5E-06 | 8,1E-05 | 0,65   |
| MODULE_51                              | -0,146 | 7E-05 | 8,1E-05 | 0,6506 |
| TURJANSKI_MAPK1_AND_MAPK2_TARGETS      | -0,067 | 0,066 | 8,1E-05 | 0,6517 |
| SANSOM_APC_TARGETS_REQUIRE_MYC         | -0,145 | 7E-05 | 8,1E-05 | 0,6519 |
| NAKAYAMA_SOFT_TISSUE_TUMORS_PCA2_UI    | -0,169 | 3E-06 | 8,1E-05 | 0,6523 |
| P53_DN.V1_UP                           | -0,155 | 2E-05 | 8,1E-05 | 0,6529 |
| GSE9037_WT_VS_IRAK4_KO_LPS_1H_STIM_    | -0,121 | 9E-04 | 8,2E-05 | 0,656  |
| KYNG_WERNER_SYNDROM_UP                 | -0,144 | 8E-05 | 8,2E-05 | 0,6566 |
| GSE37416_CTRL_VS_OH_F_TULARENSIS_LV:   | -0,098 | 0,008 | 8,2E-05 | 0,6593 |
| GCCATNTTG_V\$YY1_Q6                    | -0,119 | 0,001 | 8,2E-05 | 0,6617 |
| MODULE_279                             | -0,075 | 0,041 | 8,2E-05 | 0,6626 |
| WARTERS_RESPONSE_TO_IR_SKIN            | -0,091 | 0,013 | 8,3E-05 | 0,664  |
| GSE7460_CTRL_VS_TGFB_TREATED_ACT_FC    | -0,127 | 5E-04 | 8,3E-05 | 0,6652 |
| SIG_CHEMOTAXIS                         | -0,155 | 2E-05 | 8,3E-05 | 0,6654 |
| V\$CRX_Q4                              | -0,104 | 0,004 | 8,3E-05 | 0,6676 |
| MITSIADES_RESPONSE_TO_APLIDIN_UP       | -0,106 | 0,004 | 8,3E-05 | 0,6677 |
| GSE17721_POLYIC_VS_PAM3CSK4_0.5H_BM    | -0,139 | 1E-04 | 8,3E-05 | 0,6684 |

|                                        |        |       |         |        |
|----------------------------------------|--------|-------|---------|--------|
| NUCLEAR_SPECK                          | -0,055 | 0,13  | 8,3E-05 | 0,6687 |
| GSE7764_IL15_NK_CELL_24H_VS_SPLENOC    | -0,162 | 9E-06 | 8,3E-05 | 0,6701 |
| GSE26928_NAIVE_VS_CXCR5_POS_CD4_TCE    | -0,08  | 0,03  | 8,4E-05 | 0,6711 |
| ZHENG_IL22_SIGNALING_DN                | -0,135 | 2E-04 | 8,4E-05 | 0,6731 |
| VECCHI_GASTRIC_CANCER_EARLY_UP         | -0,166 | 5E-06 | 8,4E-05 | 0,6757 |
| MORF_CD8A                              | -0,111 | 0,002 | 8,4E-05 | 0,6758 |
| ZEMBUTSU_SENSITIVITY_TO_MITOMYCIN      | -0,127 | 5E-04 | 8,4E-05 | 0,6764 |
| GSE13411_PLASMA_CELL_VS_MEMORY_BCEI    | -0,18  | 8E-07 | 8,4E-05 | 0,6771 |
| SNIJDERS_AMPLIFIED_IN_HEAD_AND_NECK_T  | -0,159 | 1E-05 | 8,5E-05 | 0,6784 |
| REACTOME_FACTORS_INVOLVED_IN_MEGAKA    | -0,152 | 3E-05 | 8,5E-05 | 0,6785 |
| V\$OCT1_06                             | -0,104 | 0,005 | 8,5E-05 | 0,6791 |
| GSE3982_BCELL_VS_TH1_DN                | -0,171 | 3E-06 | 8,5E-05 | 0,6793 |
| CELL_CYCLE_CHECKPOINT_GO_0000075       | -0,152 | 3E-05 | 8,5E-05 | 0,6816 |
| HEDENFALK_BREAST_CANCER_BRACX_UP       | -0,139 | 1E-04 | 8,5E-05 | 0,6818 |
| PASINI_SUZ12_TARGETS_DN                | -0,136 | 2E-04 | 8,5E-05 | 0,684  |
| PID_SYNDECAN_3_PATHWAY                 | -0,167 | 4E-06 | 8,6E-05 | 0,687  |
| V\$LYF1_01                             | -0,092 | 0,012 | 8,6E-05 | 0,6887 |
| BOYLAN_MULTIPLE_MYELOMA_PCA3_DN        | -0,114 | 0,002 | 8,6E-05 | 0,6921 |
| GSE36392_MAC_VS_NEUTROPHIL_IL25_TRE/   | -0,14  | 1E-04 | 8,6E-05 | 0,6923 |
| PID_CMYB_PATHWAY                       | -0,111 | 0,002 | 8,7E-05 | 0,6953 |
| MARTINEZ_RB1_TARGETS_UP                | -0,131 | 3E-04 | 8,7E-05 | 0,6991 |
| REACTOME_NUCLEAR_SIGNALING_BY_ERBB4    | -0,037 | 0,312 | 8,7E-05 | 0,7003 |
| GSE17974_IL4_AND_ANTI_IL12_VS_UNTREA   | -0,104 | 0,005 | 8,8E-05 | 0,7011 |
| MYC_UP.V1_UP                           | -0,146 | 6E-05 | 8,8E-05 | 0,7031 |
| CAGGGTC,MIR-504                        | -0,094 | 0,01  | 8,8E-05 | 0,7045 |
| HELLER_HDAC_TARGETS_SILENCED_BY_METH   | -0,138 | 1E-04 | 8,8E-05 | 0,7046 |
| GNF2_DENR                              | -0,169 | 3E-06 | 8,8E-05 | 0,7074 |
| GSE7460_CTRL_VS_TGFB_TREATED_ACT_TC    | -0,105 | 0,004 | 8,8E-05 | 0,7074 |
| SCIAN_INVERSED_TARGETS_OF_TP53_AND_    | -0,141 | 1E-04 | 8,9E-05 | 0,7082 |
| GSE27786_CD4_TCELL_VS_NKTCELL_UP       | -0,121 | 9E-04 | 8,9E-05 | 0,7088 |
| GSE14308_TH17_VS_NAIVE_CD4_TCELL_DN    | -0,112 | 0,002 | 8,9E-05 | 0,7115 |
| BLALOCK_ALZHEIMERS_DISEASE_INCIPIENT_U | -0,121 | 9E-04 | 8,9E-05 | 0,7138 |
| NUCLEAR_CHROMATIN                      | -0,173 | 2E-06 | 9E-05   | 0,7184 |
| VART_KSHV_INFECTION_ANGIOGENIC_MARK    | -0,129 | 4E-04 | 9E-05   | 0,721  |
| V\$ZF5_B                               | -0,117 | 0,001 | 9E-05   | 0,7218 |
| LIANG_HEMATOPOIESIS_STEM_CELL_NUMBER   | -0,15  | 4E-05 | 9E-05   | 0,7225 |
| SMID_BREAST_CANCER_LUMINAL_A_UP        | -0,007 | 0,858 | 9E-05   | 0,7226 |
| G1_S_TRANSITION_OF_MITOTIC_CELL_CYCLE  | -0,167 | 5E-06 | 9,1E-05 | 0,7245 |
| KEGG_DILATED_CARDIOMYOPATHY            | -0,074 | 0,043 | 9,1E-05 | 0,7245 |
| HETEROGENEOUS_NUCLEAR_RIBONUCLEOPRO    | -0,119 | 0,001 | 9,1E-05 | 0,7263 |
| STK33_NOMO_DN                          | -0,139 | 1E-04 | 9,1E-05 | 0,727  |
| GSE17721_LPS_VS_PAM3CSK4_0.5H_BMDM     | -0,124 | 7E-04 | 9,1E-05 | 0,7275 |

|                                       |        |       |         |        |
|---------------------------------------|--------|-------|---------|--------|
| SARRIO_EPITHELIAL_MESENCHYMAL_TRANSIT | -0,134 | 2E-04 | 9,1E-05 | 0,7301 |
| LIU_IL13_PRIMING_MODEL                | -0,12  | 1E-03 | 9,1E-05 | 0,7304 |
| HELLER_HDAC_TARGETS_UP                | -0,127 | 5E-04 | 9,2E-05 | 0,7325 |
| CATRRAGC_UNKNOWN                      | -0,113 | 0,002 | 9,2E-05 | 0,7334 |
| OHASHI_AURKA_TARGETS                  | -0,154 | 2E-05 | 9,2E-05 | 0,7338 |
| GNF2_TM4SF2                           | -0,127 | 5E-04 | 9,2E-05 | 0,7342 |
| GSE17721_LPS_VS_GARDIQUIMOD_0.5H_BMI  | -0,151 | 3E-05 | 9,2E-05 | 0,7343 |
| CENTRAL_NERVOUS_SYSTEM_DEVELOPMENT    | -0,127 | 5E-04 | 9,2E-05 | 0,7348 |
| MODULE_332                            | -0,152 | 3E-05 | 9,2E-05 | 0,7356 |
| STEIN_ESRRA_TARGETS_RESPONSIVE_TO_ES  | -0,152 | 3E-05 | 9,2E-05 | 0,7363 |
| MODULE_120                            | -0,138 | 2E-04 | 9,2E-05 | 0,7364 |
| V\$BACH1_01                           | -0,134 | 2E-04 | 9,3E-05 | 0,7384 |
| TOMLINS_METASTASIS_UP                 | -0,169 | 4E-06 | 9,3E-05 | 0,7422 |
| MICROTUBULE_MOTOR_ACTIVITY            | -0,126 | 6E-04 | 9,3E-05 | 0,7428 |
| MODULE_36                             | -0,158 | 2E-05 | 9,3E-05 | 0,7429 |
| GENTILE_UV_RESPONSE_CLUSTER_D1        | -0,164 | 7E-06 | 9,3E-05 | 0,7432 |
| REGULATION_OF_CATALYTIC_ACTIVITY      | -0,132 | 3E-04 | 9,3E-05 | 0,7432 |
| V\$STAT1_03                           | -0,101 | 0,006 | 9,3E-05 | 0,7435 |
| KANG_IMMORTALIZED_BY_TERT_UP          | -0,144 | 8E-05 | 9,3E-05 | 0,7439 |
| KIM_WT1_TARGETS_12HR_DN               | -0,164 | 7E-06 | 9,4E-05 | 0,7496 |
| LEE_BMP2_TARGETS_UP                   | -0,073 | 0,046 | 9,4E-05 | 0,7511 |
| GTCTTCC,MIR-7                         | -0,114 | 0,002 | 9,4E-05 | 0,7518 |
| CERIBELLI_PROMOTERS_INACTIVE_AND_BOUN | -0,165 | 6E-06 | 9,4E-05 | 0,752  |
| REACTOME_TGF_BETA_RECEPTOR_SIGNALING  | -0,146 | 6E-05 | 9,5E-05 | 0,7526 |
| GSE15215_CD2_POS_VS_NEG_PDC_UP        | -0,102 | 0,005 | 9,5E-05 | 0,7562 |
| CTTTGTA,MIR-524                       | -0,121 | 1E-03 | 9,5E-05 | 0,7573 |
| MURAKAMI_UV_RESPONSE_1HR_UP           | -0,148 | 5E-05 | 9,6E-05 | 0,7613 |
| GSE1460_CD4_THYMOCYTE_VS_NAIVE_CD4    | -0,157 | 2E-05 | 9,6E-05 | 0,7617 |
| GSE360_T_GONDII_VS_B_MALAYI_LOW_DOS   | -0,14  | 1E-04 | 9,6E-05 | 0,7623 |
| REACTOME_CGMP_EFFECTS                 | -0,1   | 0,006 | 9,6E-05 | 0,7651 |
| chr9p21                               | -0,137 | 2E-04 | 9,6E-05 | 0,7676 |
| GSE22886_NAIVE_BCELL_VS_NEUTROPHIL_L  | -0,134 | 2E-04 | 9,7E-05 | 0,7677 |
| NAGASHIMA_NRG1_SIGNALING_UP           | -0,114 | 0,002 | 9,7E-05 | 0,7681 |
| TGANNYRGCA_V\$TCF11MAFG_01            | -0,125 | 6E-04 | 9,7E-05 | 0,7687 |
| REACTOME_TRAFFICKING_OF_AMPA_RECEPTC  | -0,075 | 0,04  | 9,7E-05 | 0,7688 |
| GSE9037_WT_VS_IRAK4_KO_BMDM_DN        | -0,128 | 5E-04 | 9,7E-05 | 0,7691 |
| LEE_BMP2_TARGETS_DN                   | -0,179 | 9E-07 | 9,7E-05 | 0,77   |
| MODULE_576                            | -0,153 | 3E-05 | 9,7E-05 | 0,77   |
| MODULE_99                             | -0,11  | 0,003 | 9,7E-05 | 0,7711 |
| GSE14350_IL2RB_KO_VS_WT_TEFF_UP       | -0,069 | 0,058 | 9,7E-05 | 0,7711 |
| V\$MAX_01                             | -0,142 | 1E-04 | 9,7E-05 | 0,7725 |
| GSE17721_0.5H_VS_24H_PAM3CSK4_BMDM    | -0,143 | 9E-05 | 9,7E-05 | 0,7726 |



|                                         |        |       |         |        |
|-----------------------------------------|--------|-------|---------|--------|
| QI_HYPOXIA_TARGETS_OF_HIF1A_AND_FOXA    | -0,153 | 3E-05 | 9,7E-05 | 0,7732 |
| ACTGTGA,MIR-27A,MIR-27B                 | -0,107 | 0,004 | 9,7E-05 | 0,7732 |
| MACLACHLAN_BRCA1_TARGETS_DN             | -0,143 | 9E-05 | 9,8E-05 | 0,7761 |
| GSE7852_THYMUS_VS_FAT_TREG_UP           | -0,095 | 0,009 | 9,8E-05 | 0,7772 |
| REACTOME_G_ALPHA_I_SIGNALLING_EVENTS    | -0,136 | 2E-04 | 9,8E-05 | 0,7773 |
| REGULATION_OF_PROTEIN_KINASE_ACTIVITY   | -0,132 | 3E-04 | 9,8E-05 | 0,7773 |
| MODULE_3                                | -0,182 | 6E-07 | 9,8E-05 | 0,7799 |
| BIOPOLYMER_MODIFICATION                 | -0,14  | 1E-04 | 9,9E-05 | 0,7833 |
| CAGCAGG,MIR-370                         | -0,134 | 3E-04 | 9,9E-05 | 0,7848 |
| PID_FOXM1PATHWAY                        | -0,151 | 4E-05 | 9,9E-05 | 0,7868 |
| V\$SRY_02                               | -0,11  | 0,003 | 9,9E-05 | 0,787  |
| FONTAINE_PAPILLARY_THYROID_CARCINOMA    | -0,093 | 0,011 | 1E-04   | 0,7902 |
| GSE29614_CTRL_VS_DAY7_TIV_FLU_VACCII    | -0,095 | 0,009 | 1E-04   | 0,7915 |
| OUILLETTE_CLL_13Q14_DELETION_DN         | -0,121 | 1E-03 | 1E-04   | 0,7918 |
| ZHENG_FOXP3_TARGETS_IN_T_LYMPHOCYTE     | -0,107 | 0,003 | 1E-04   | 0,7918 |
| MODULE_200                              | -0,125 | 6E-04 | 0,0001  | 0,7944 |
| RUIZ_TNC_TARGETS_DN                     | -0,167 | 5E-06 | 0,0001  | 0,8001 |
| CCCAGAG,MIR-326                         | -0,12  | 0,001 | 0,0001  | 0,8008 |
| V\$HNF3B_01                             | -0,092 | 0,012 | 0,0001  | 0,8028 |
| RESPONSE_TO_UV                          | -0,163 | 8E-06 | 0,0001  | 0,8042 |
| TOYOTA_TARGETS_OF_MIR34B_AND_MIR34C     | -0,152 | 3E-05 | 0,0001  | 0,8042 |
| ACEVEDO_LIVER_CANCER_WITH_H3K27ME3_     | -0,133 | 3E-04 | 0,0001  | 0,8042 |
| GSE360_L_MAJOR_VS_B_MALAYI_HIGH_DOS     | -0,13  | 4E-04 | 0,0001  | 0,8042 |
| CHARAFE_BREAST_CANCER_LUMINAL_VS_BA     | -0,165 | 6E-06 | 0,0001  | 0,8044 |
| chr11p                                  | -0,162 | 9E-06 | 0,0001  | 0,8078 |
| KRAS.LUNG.BREAST_UP.V1_UP               | -0,138 | 1E-04 | 0,0001  | 0,8078 |
| KEGG_CALCIUM_SIGNALING_PATHWAY          | -0,104 | 0,005 | 0,0001  | 0,8083 |
| HANN_RESISTANCE_TO_BCL2_INHIBITOR_UP    | -0,151 | 4E-05 | 0,0001  | 0,8089 |
| REACTOME_SIGNALING_BY_GPCR              | -0,12  | 0,001 | 0,0001  | 0,8102 |
| SPECIFIC_RNA_POLYMERASE_II_TRANSCRIPTIC | -0,085 | 0,02  | 0,0001  | 0,8117 |
| HOOI_ST7_TARGETS_UP                     | -0,126 | 6E-04 | 0,0001  | 0,813  |
| MORF_IL13                               | -0,105 | 0,004 | 0,0001  | 0,813  |
| MODULE_371                              | -0,175 | 2E-06 | 0,0001  | 0,8141 |
| GSE26669_CTRL_VS_COSTIM_BLOCK_MLR_C     | -0,1   | 0,006 | 0,0001  | 0,8142 |
| SYSTEM_PROCESS                          | -0,106 | 0,004 | 0,0001  | 0,8173 |
| V\$NERF_Q2                              | -0,103 | 0,005 | 0,0001  | 0,818  |
| chr2p23                                 | -0,169 | 3E-06 | 0,0001  | 0,8186 |
| KAECH_NAIVE_VS_DAY15_EFF_CD8_TCELL_     | -0,117 | 0,001 | 0,0001  | 0,8191 |
| FURUKAWA_DUSP6_TARGETS_PCI35_DN         | -0,155 | 2E-05 | 0,0001  | 0,8201 |
| STAMBOLSKY_RESPONSE_TO_VITAMIN_D3_U     | -0,153 | 3E-05 | 0,0001  | 0,8201 |
| CYTOPLASM                               | -0,131 | 3E-04 | 0,0001  | 0,8207 |
| GSE29618_PRE_VS_DAY7_POST_LAIV_FLU_     | -0,107 | 0,003 | 0,0001  | 0,8228 |

|                                      |        |       |         |        |
|--------------------------------------|--------|-------|---------|--------|
| MORF_PPP2R5B                         | -0,111 | 0,002 | 0,0001  | 0,8255 |
| BROWNE_HCMV_INFECTION_14HR_UP        | -0,155 | 2E-05 | 0,0001  | 0,8257 |
| CYCLIN_D1_UP.V1_DN                   | -0,109 | 0,003 | 0,0001  | 0,8262 |
| REACTOME_PHOSPHOLIPASE_C_MEDIATED_C  | -0,07  | 0,055 | 0,0001  | 0,8274 |
| GSE17580_UNINFECTED_VS_S_MANSONI_INF | -0,104 | 0,004 | 0,0001  | 0,828  |
| GSE17721_LPS_VS_GARDIQUIMOD_16H_BMC  | -0,163 | 7E-06 | 0,00011 | 0,8334 |
| DURCHDEWALD_SKIN_CARCINOGENESIS_UP   | -0,14  | 1E-04 | 0,00011 | 0,8334 |
| V\$TCF4_Q5                           | -0,114 | 0,002 | 0,00011 | 0,8336 |
| GSE17721_LPS_VS_CPG_1H_BMDM_DN       | -0,143 | 9E-05 | 0,00011 | 0,8342 |
| ABE_VEGFA_TARGETS                    | -0,142 | 1E-04 | 0,00011 | 0,8368 |
| V\$GATA_Q6                           | -0,101 | 0,006 | 0,00011 | 0,8397 |
| GTGCCAT,MIR-183                      | -0,136 | 2E-04 | 0,00011 | 0,8403 |
| GSE27786_LSK_VS_MONO_MAC_UP          | -0,135 | 2E-04 | 0,00011 | 0,8411 |
| GROSS_HYPOXIA_VIA_HIF1A_UP           | -0,159 | 1E-05 | 0,00011 | 0,8426 |
| PID_IL2_PI3KPATHWAY                  | -0,13  | 4E-04 | 0,00011 | 0,8426 |
| NEGATIVE_REGULATION_OF_GROWTH        | -0,089 | 0,015 | 0,00011 | 0,8437 |
| ECTODERM_DEVELOPMENT                 | -0,165 | 6E-06 | 0,00011 | 0,8452 |
| GSE9650_EXHAUSTED_VS_MEMORY_CD8_TC   | -0,125 | 7E-04 | 0,00011 | 0,8468 |
| PID_SHP2_PATHWAY                     | -0,123 | 7E-04 | 0,00011 | 0,8495 |
| BOYLAN_MULTIPLE_MYELOMA_D_CLUSTER_U  | -0,098 | 0,008 | 0,00011 | 0,8511 |
| KINASE_INHIBITOR_ACTIVITY            | -0,112 | 0,002 | 0,00011 | 0,8514 |
| V\$NFY_Q6                            | -0,158 | 2E-05 | 0,00011 | 0,8552 |
| KIM_TIAL1_TARGETS                    | -0,179 | 9E-07 | 0,00011 | 0,8578 |
| GSE27786_CD4_TCELL_VS_NKTCELL_DN     | -0,118 | 0,001 | 0,00011 | 0,8588 |
| SIGNAL_TRANSDUCTION                  | -0,116 | 0,001 | 0,00011 | 0,863  |
| CTIP_DN.V1_DN                        | -0,097 | 0,008 | 0,00011 | 0,8638 |
| SCHURINGA_STAT5A_TARGETS_UP          | -0,116 | 0,002 | 0,00011 | 0,8643 |
| KYNG_ENVIRONMENTAL_STRESS_RESPONSE_  | -0,101 | 0,006 | 0,00011 | 0,8679 |
| MODULE_80                            | -0,146 | 6E-05 | 0,00011 | 0,8685 |
| MODULE_129                           | -0,112 | 0,002 | 0,00011 | 0,8762 |
| BIOCARTA_ACE2_PATHWAY                | -0,124 | 7E-04 | 0,00011 | 0,8764 |
| HUTTMANN_B_CLL_POOR_SURVIVAL_DN      | -0,128 | 5E-04 | 0,00011 | 0,8768 |
| BIOCARTA_AMI_PATHWAY                 | -0,092 | 0,012 | 0,00011 | 0,8769 |
| V\$SREBP1_Q2                         | -0,143 | 9E-05 | 0,00011 | 0,8789 |
| CTIP_DN.V1_UP                        | -0,131 | 3E-04 | 0,00011 | 0,8805 |
| GSE18791_UNSTIM_VS_NEWCATSLE_VIRUS_  | -0,072 | 0,049 | 0,00011 | 0,8807 |
| MORI_MATURE_B_LYMPHOCYTE_DN          | -0,147 | 6E-05 | 0,00011 | 0,8839 |
| REACTOME_FATTY_ACYL_COA_BIOSYNTHESIS | -0,144 | 8E-05 | 0,00011 | 0,8848 |
| BILD_HRAS_ONCOGENIC_SIGNATURE        | -0,16  | 1E-05 | 0,00011 | 0,8867 |
| GRAESSMANN_RESPONSE_TO_MC_AND_SERU   | -0,156 | 2E-05 | 0,00011 | 0,8869 |
| PARENT_MTOR_SIGNALING_DN             | -0,125 | 6E-04 | 0,00011 | 0,8871 |
| REACTOME_DESTABILIZATION_OF_MRNA_BY_ | -0,142 | 1E-04 | 0,00011 | 0,8903 |

|                                      |        |       |         |        |
|--------------------------------------|--------|-------|---------|--------|
| XU_GH1_EXOGENOUS_TARGETS_UP          | -0,096 | 0,009 | 0,00011 | 0,8903 |
| GSE24634_NAIVE_CD4_TCELL_VS_DAY5_IL4 | -0,069 | 0,061 | 0,00011 | 0,8929 |
| CHROMATIN_ASSEMBLY_OR_DISASSEMBLY    | -0,162 | 8E-06 | 0,00011 | 0,903  |
| KYNG_RESPONSE_TO_H2O2_VIA_ERCC6_DN   | -0,133 | 3E-04 | 0,00012 | 0,9043 |
| RICKMAN_HEAD_AND_NECK_CANCER_B       | -0,148 | 5E-05 | 0,00012 | 0,9043 |
| GROWTH_FACTOR_BINDING                | -0,093 | 0,011 | 0,00012 | 0,9071 |
| ODONNELL_TFRC_TARGETS_UP             | -0,094 | 0,01  | 0,00012 | 0,9128 |
| V\$MEF2_02                           | -0,09  | 0,014 | 0,00012 | 0,9143 |
| SABATES_COLORECTAL_ADENOMA_UP        | -0,165 | 6E-06 | 0,00012 | 0,9147 |
| REACTOME_DAG_AND_IP3_SIGNALING       | -0,071 | 0,052 | 0,00012 | 0,9152 |
| MODULE_13                            | -0,109 | 0,003 | 0,00012 | 0,9161 |
| RB_P130_DN.V1_UP                     | -0,131 | 3E-04 | 0,00012 | 0,9173 |
| ZHU_SKIL_TARGETS_UP                  | -0,124 | 7E-04 | 0,00012 | 0,9209 |
| YAO_HOXA10_TARGETS_VIA_PROGESTERONE  | -0,065 | 0,075 | 0,00012 | 0,9225 |
| MODULE_196                           | -0,177 | 1E-06 | 0,00012 | 0,9262 |
| SASSON_RESPONSE_TO_FORSKOLIN_DN      | -0,134 | 3E-04 | 0,00012 | 0,9269 |
| GSE36392_TYPE_2_MYELOID_VS_MAC_IL25  | -0,106 | 0,004 | 0,00012 | 0,9269 |
| GSE9006_HEALTHY_VS_TYPE_1_DIABETES_I | -0,113 | 0,002 | 0,00012 | 0,9288 |
| GSE360_HIGH_VS_LOW_DOSE_B_MALAYI_DC  | -0,126 | 6E-04 | 0,00012 | 0,9296 |
| GSE29618_PRE_VS_DAY7_POST_LAIV_FLU   | -0,146 | 6E-05 | 0,00012 | 0,9316 |
| REGULATION_OF_KINASE_ACTIVITY        | -0,132 | 3E-04 | 0,00012 | 0,9329 |
| REACTOME_TRANSCRIPTIONAL_ACTIVITY_OF | -0,159 | 1E-05 | 0,00012 | 0,9342 |
| V\$FREAC4_01                         | -0,092 | 0,012 | 0,00012 | 0,9351 |
| SEMBA_FHIT_TARGETS_DN                | -0,138 | 2E-04 | 0,00012 | 0,9363 |
| MORF_SUPT3H                          | -0,11  | 0,003 | 0,00012 | 0,9381 |
| ATM_DN.V1_UP                         | -0,106 | 0,004 | 0,00012 | 0,9404 |
| MAGNESIUM_ION_BINDING                | -0,17  | 3E-06 | 0,00012 | 0,9449 |
| TMTCGCGANR_UNKNOWN                   | -0,161 | 9E-06 | 0,00012 | 0,9473 |
| REGULATION_OF_TRANSFERASE_ACTIVITY   | -0,134 | 2E-04 | 0,00012 | 0,9509 |
| ODONNELL_TFRC_TARGETS_DN             | -0,154 | 2E-05 | 0,00012 | 0,9516 |
| PID_ENDOTHELINPATHWAY                | -0,107 | 0,003 | 0,00012 | 0,9542 |
| REACTOME_SIGNALING_BY_SCF_KIT        | -0,135 | 2E-04 | 0,00012 | 0,9545 |
| CHIBA_RESPONSE_TO_TSA_UP             | -0,093 | 0,011 | 0,00012 | 0,9546 |
| REACTOME_CELL_CYCLE                  | -0,154 | 2E-05 | 0,00012 | 0,9554 |
| BIOCARTA_VITCB_PATHWAY               | -0,139 | 1E-04 | 0,00012 | 0,9567 |
| MATZUK_EARLY_ANTRAL_FOLLICLE         | -0,129 | 4E-04 | 0,00012 | 0,9592 |
| GGCNNMSMYNTTG_UNKNOWN                | -0,112 | 0,002 | 0,00012 | 0,9594 |
| NUCLEOSIDE_TRIPHOSPHATASE_ACTIVITY   | -0,112 | 0,002 | 0,00012 | 0,9603 |
| BROWNE_HCMV_INFECTION_24HR_DN        | -0,112 | 0,002 | 0,00012 | 0,9611 |
| BREDEMEYER_RAG_SIGNALING_NOT_VIA_ATM | -0,101 | 0,006 | 0,00012 | 0,9613 |
| GSE20715_0H_VS_6H_OZONE_TLR4_KO_LU   | -0,109 | 0,003 | 0,00012 | 0,9617 |
| GSE24142_EARLY_THYMIC_PROGENITOR_VS  | -0,133 | 3E-04 | 0,00012 | 0,9631 |

|                                       |        |       |         |        |
|---------------------------------------|--------|-------|---------|--------|
| JAEGER_METASTASIS_DN                  | -0,151 | 4E-05 | 0,00012 | 0,9669 |
| CROONQUIST_STROMAL_STIMULATION_UP     | -0,127 | 5E-04 | 0,00012 | 0,9716 |
| V\$AHR_Q5                             | -0,123 | 7E-04 | 0,00012 | 0,973  |
| LEE_RECENT_THYMIC_EMIGRANT            | -0,138 | 2E-04 | 0,00012 | 0,9761 |
| GSE36476_CTRL_VS_TSST_ACT_40H_MEMO    | -0,09  | 0,014 | 0,00013 | 0,9772 |
| KIM_MYCL1_AMPLIFICATION_TARGETS_DN    | -0,177 | 1E-06 | 0,00013 | 0,9779 |
| REACTOME_NEUROTRANSMITTER_RECEPTOR_   | -0,116 | 0,002 | 0,00013 | 0,987  |
| GENTLES_LEUKEMIC_STEM_CELL_DN         | -0,164 | 6E-06 | 0,00013 | 0,9873 |
| GSE24634_NAIVE_CD4_TCELL_VS_DAY7_IL4  | -0,06  | 0,1   | 0,00013 | 0,9888 |
| GSE24142_DN2_VS_DN3_THYMOCYTE_ADUL    | -0,133 | 3E-04 | 0,00013 | 0,993  |
| KYNG_RESPONSE_TO_H2O2_VIA_ERCC6       | -0,121 | 9E-04 | 0,00013 | 0,9951 |
| GUENTHER_GROWTH_SPHERICAL_VS_ADHERE   | -0,151 | 3E-05 | 0,00013 | 0,9972 |
| CSR_LATE_UP.V1_DN                     | -0,093 | 0,011 | 0,00013 | 0,9992 |
| GSE7764_IL15_TREATED_VS_CTRL_NK_CELI  | -0,079 | 0,032 | 0,00013 | 0,9992 |
| GGAMTNNNNNTCCY_UNKNOWN                | -0,107 | 0,003 | 0,00013 | 0,9994 |
| MULLIGAN_NTF3_SIGNALING_VIA_INSR_AND_ | -0,18  | 8E-07 | 0,00023 | 1      |
| NADELLA_PRKAR1A_TARGETS_UP            | -0,179 | 9E-07 | 0,00164 | 1      |
| LANDIS_ERBB2_BREAST_PRENEOPLASTIC_UP  | -0,179 | 9E-07 | 0,00038 | 1      |
| OXIDOREDUCTASE_ACTIVITY_GO_0016706    | -0,177 | 1E-06 | 0,00037 | 1      |
| KARAKAS_TGFB1_SIGNALING               | -0,176 | 1E-06 | 0,0003  | 1      |
| BACOLOD_RESISTANCE_TO_ALKYLATING_AG   | -0,176 | 1E-06 | 0,00032 | 1      |
| KARLSSON_TGFB1_TARGETS_UP             | -0,175 | 2E-06 | 0,00133 | 1      |
| FLECHNER_PBL_KIDNEY_TRANSPLANT_REJEC  | -0,172 | 2E-06 | 0,00017 | 1      |
| LANDIS_ERBB2_BREAST_TUMORS_324_UP     | -0,172 | 2E-06 | 0,00023 | 1      |
| LI_LUNG_CANCER                        | -0,171 | 3E-06 | 0,00025 | 1      |
| REACTOME_TRANSCRIPTION                | -0,171 | 3E-06 | 0,00071 | 1      |
| PID_CDC42_PATHWAY                     | -0,171 | 3E-06 | 0,00035 | 1      |
| WIERENGA_PML_INTERACTOME              | -0,17  | 3E-06 | 0,00053 | 1      |
| MORF_BMI1                             | -0,169 | 3E-06 | 0,00108 | 1      |
| YIH_RESPONSE_TO_ARSENITE_C3           | -0,169 | 3E-06 | 0,00019 | 1      |
| MODULE_253                            | -0,169 | 4E-06 | 0,00031 | 1      |
| RICKMAN_HEAD_AND_NECK_CANCER_C        | -0,169 | 4E-06 | 0,00014 | 1      |
| MODULE_421                            | -0,168 | 4E-06 | 0,00137 | 1      |
| RICKMAN_TUMOR_DIFFERENTIATED_WELL_VS  | -0,168 | 4E-06 | 0,00026 | 1      |
| BENPORATH_MYC_MAX_TARGETS             | -0,168 | 4E-06 | 0,00027 | 1      |
| GSE17721_POLYIC_VS_GARDIQUIMOD_12H_I  | -0,167 | 4E-06 | 0,00015 | 1      |
| JAZAG_TGFB1_SIGNALING_UP              | -0,166 | 5E-06 | 0,00028 | 1      |
| NUCLEOLUS                             | -0,166 | 5E-06 | 0,00017 | 1      |
| GSE20715_0H_VS_48H_OZONE_TLR4_KO_L    | -0,166 | 5E-06 | 0,00104 | 1      |
| KAYO_AGING_MUSCLE_DN                  | -0,166 | 5E-06 | 0,00019 | 1      |
| PHESSE_TARGETS_OF_APC_AND_MBD2_DN     | -0,166 | 5E-06 | 0,00043 | 1      |
| MODULE_264                            | -0,166 | 5E-06 | 0,00041 | 1      |

|                                        |        |       |         |   |
|----------------------------------------|--------|-------|---------|---|
| WANG_RESPONSE_TO_PACLITAXEL_VIA_MAP    | -0,166 | 5E-06 | 0,00013 | 1 |
| RNA_SPLICING                           | -0,166 | 6E-06 | 0,00013 | 1 |
| KEGG_PATHOGENIC_ESCHERICHIA_COLI_INFEC | -0,166 | 6E-06 | 0,00019 | 1 |
| GSE17974_CTRL_VS_ACT_IL4_AND_ANTI_IL   | -0,165 | 6E-06 | 0,00115 | 1 |
| BLALOCK_ALZHEIMERS_DISEASE_INCIPIENT_D | -0,165 | 6E-06 | 0,00017 | 1 |
| REACTOME_MRNA_3_END_PROCESSING         | -0,165 | 6E-06 | 0,00091 | 1 |
| ONDER_CDH1_TARGETS_2_DN                | -0,165 | 6E-06 | 0,00017 | 1 |
| GSE1460_INTRATHYMIC_T_PROGENITOR_VS_   | -0,165 | 6E-06 | 0,00022 | 1 |
| GSE13493_DP_VS_CD4INTCD8POS_THYMOC     | -0,165 | 6E-06 | 0,00032 | 1 |
| HUMMEL_BURKITTS_LYMPHOMA_UP            | -0,165 | 6E-06 | 0,00017 | 1 |
| CHROMATIN_REMODELING                   | -0,164 | 7E-06 | 0,00064 | 1 |
| KEGG_ADHERENS_JUNCTION                 | -0,164 | 7E-06 | 0,00016 | 1 |
| VANTVEER_BREAST_CANCER_BRCA1_UP        | -0,164 | 7E-06 | 0,00025 | 1 |
| GNF2_RPA1                              | -0,164 | 7E-06 | 0,00035 | 1 |
| SMID_BREAST_CANCER_RELAPSE_IN_LUNG_L   | -0,163 | 7E-06 | 0,00037 | 1 |
| GSE12366_GC_BCELL_VS_PLASMA_CELL_UP    | -0,163 | 8E-06 | 0,00013 | 1 |
| GNF2_NPM1                              | -0,163 | 8E-06 | 0,00017 | 1 |
| WANG_SMARCE1_TARGETS_DN                | -0,163 | 8E-06 | 0,00074 | 1 |
| RHEIN_ALL_GLUCOCORTICOID_THERAPY_DN    | -0,162 | 8E-06 | 0,00014 | 1 |
| PID_DNAPK_PATHWAY                      | -0,162 | 8E-06 | 0,00016 | 1 |
| REACTOME_AMINO_ACID_AND_OLIGOPEPTIDE   | -0,162 | 9E-06 | 0,00018 | 1 |
| PASINI_SUZ12_TARGETS_UP                | -0,162 | 9E-06 | 0,00015 | 1 |
| DORMOY_ELAVL1_TARGETS                  | -0,162 | 9E-06 | 0,00018 | 1 |
| SANA_RESPONSE_TO_IFNG_DN               | -0,162 | 9E-06 | 0,00159 | 1 |
| TUBULIN_BINDING                        | -0,162 | 9E-06 | 0,00002 | 1 |
| KAPOSI_LIVER_CANCER_MET_UP             | -0,161 | 1E-05 | 0,00109 | 1 |
| GSE17721_POLYIC_VS_GARDIQUIMOD_24H_I   | -0,161 | 1E-05 | 0,00016 | 1 |
| BRUECKNER_TARGETS_OF_MIRLET7A3_DN      | -0,161 | 1E-05 | 0,00015 | 1 |
| GSE25087_FETAL_VS_ADULT_TCONV_UP       | -0,161 | 1E-05 | 0,00202 | 1 |
| DODD_NASOPHARYNGEAL_CARCINOMA_DN       | -0,161 | 1E-05 | 0,00027 | 1 |
| GSE31082_DN_VS_CD8_SP_THYMOCYTE_UP     | -0,161 | 1E-05 | 0,00037 | 1 |
| SESTO_RESPONSE_TO_UV_C7                | -0,16  | 1E-05 | 0,00146 | 1 |
| GSE14308_TH17_VS_NAIVE_CD4_TCELL_UP    | -0,16  | 1E-05 | 0,00033 | 1 |
| LIAO_HAVE_SOX4_BINDING_SITES           | -0,16  | 1E-05 | 0,00093 | 1 |
| REACTOME_APOPTOSIS                     | -0,16  | 1E-05 | 0,00242 | 1 |
| GCNP_SHH_UP_EARLY.V1_UP                | -0,16  | 1E-05 | 0,00016 | 1 |
| MTOR_UP.V1_UP                          | -0,16  | 1E-05 | 0,00069 | 1 |
| JOHANSSON_GLIOMAGENESIS_BY_PDGFB_UP    | -0,159 | 1E-05 | 0,00028 | 1 |
| CHANG_CORE_SERUM_RESPONSE_UP           | -0,159 | 1E-05 | 0,00034 | 1 |
| RNA_POLYMERASE_II_TRANSCRIPTION_MEDIA  | -0,159 | 1E-05 | 0,00067 | 1 |
| REACTOME_APOPTOTIC_CLEAVAGE_OF_CELL    | -0,159 | 1E-05 | 0,00169 | 1 |
| STONER_ESOPHAGEAL_CARCINOGENESIS_DN    | -0,159 | 1E-05 | 0,00018 | 1 |

|                                         |        |       |         |   |
|-----------------------------------------|--------|-------|---------|---|
| BILANGES_SERUM_SENSITIVE_VIA_TSC2       | -0,159 | 1E-05 | 0,00013 | 1 |
| SERVITJA_LIVER_HNF1A_TARGETS_UP         | -0,159 | 1E-05 | 0,00019 | 1 |
| PUIFFE_INVASION_INHIBITED_BY_ASCITES_DN | -0,158 | 1E-05 | 0,00034 | 1 |
| KOKKINAKIS_METHIONINE_DEPRIVATION_96H   | -0,158 | 1E-05 | 0,00022 | 1 |
| MORF_CDC16                              | -0,158 | 1E-05 | 0,00098 | 1 |
| PID_ECADHERIN_KERATINOCYTE_PATHWAY      | -0,158 | 1E-05 | 0,00389 | 1 |
| PUJANA_CHEK2_PCC_NETWORK                | -0,158 | 1E-05 | 0,00013 | 1 |
| STONER_ESOPHAGEAL_CARCINOGENESIS_UP     | -0,158 | 1E-05 | 0,00157 | 1 |
| GSE3982_EFF_MEMORY_CD4_TCELL_VS_TH2     | -0,158 | 1E-05 | 0,00042 | 1 |
| NUCLEAR_CHROMOSOME_PART                 | -0,158 | 1E-05 | 0,0002  | 1 |
| KOINUMA_TARGETS_OF_SMAD2_OR_SMAD3       | -0,158 | 1E-05 | 0,00015 | 1 |
| GSE24634_TEFF_VS_TCONV_DAY3_IN_CULT     | -0,158 | 1E-05 | 0,00013 | 1 |
| ST_PHOSPHOINOSITIDE_3_KINASE_PATHWAY    | -0,158 | 1E-05 | 0,00054 | 1 |
| GCM_CBF                                 | -0,158 | 2E-05 | 0,00016 | 1 |
| YAMASHITA_METHYLATED_IN_PROSTATE_CA     | -0,158 | 2E-05 | 0,0002  | 1 |
| REACTOME_MEIOSIS                        | -0,158 | 2E-05 | 0,0013  | 1 |
| ZHAN_VARIABLE_EARLY_DIFFERENTIATION_G   | -0,158 | 2E-05 | 0,00054 | 1 |
| MICROTUBULE_CYTOSKELETON_ORGANIZATIO    | -0,158 | 2E-05 | 0,00015 | 1 |
| LEI_MYB_TARGETS                         | -0,157 | 2E-05 | 0,0005  | 1 |
| MORF_PPP1CC                             | -0,157 | 2E-05 | 0,00028 | 1 |
| FERRANDO_HOX11_NEIGHBORS                | -0,157 | 2E-05 | 0,00047 | 1 |
| HU_ANGIOGENESIS_DN                      | -0,157 | 2E-05 | 0,00194 | 1 |
| GSE22886_UNSTIM_VS_IL2_STIM_NKCELL_D    | -0,157 | 2E-05 | 0,0002  | 1 |
| chr13q11                                | -0,157 | 2E-05 | 0,00015 | 1 |
| MODULE_39                               | -0,157 | 2E-05 | 0,00068 | 1 |
| PORE_COMPLEX                            | -0,157 | 2E-05 | 0,00095 | 1 |
| MICROTUBULE_BASED_PROCESS               | -0,157 | 2E-05 | 0,00024 | 1 |
| GSE10239_NAIVE_VS_KLRG1HIGH_EFF_CD8_    | -0,157 | 2E-05 | 0,00031 | 1 |
| RNA_SPLICINGVIA_TRANSESTERIFICATION_RE  | -0,156 | 2E-05 | 0,00055 | 1 |
| HINATA_NFKB_TARGETS_KERATINOCYTE_DN     | -0,156 | 2E-05 | 0,00063 | 1 |
| MUELLER_METHYLATED_IN_GLIOMASTOMA       | -0,156 | 2E-05 | 0,00028 | 1 |
| KRIGE_RESPONSE_TO_TOSEDOSTAT_24HR_D     | -0,156 | 2E-05 | 0,00022 | 1 |
| BIOCARTA_ARF_PATHWAY                    | -0,156 | 2E-05 | 0,00017 | 1 |
| HORIUCHI_WTAP_TARGETS_DN                | -0,156 | 2E-05 | 0,00014 | 1 |
| ROYLANCE_BREAST_CANCER_16Q_COPY_NU      | -0,156 | 2E-05 | 0,00661 | 1 |
| HASLINGER_B_CLL_WITH_CHROMOSOME_12_     | -0,156 | 2E-05 | 0,00027 | 1 |
| BURTON_ADIPOGENESIS_2                   | -0,156 | 2E-05 | 0,00061 | 1 |
| CHROMATIN_BINDING                       | -0,156 | 2E-05 | 0,00028 | 1 |
| MODULE_395                              | -0,156 | 2E-05 | 0,00472 | 1 |
| HESS_TARGETS_OF_HOXA9_AND_MEIS1_UP      | -0,155 | 2E-05 | 0,00018 | 1 |
| KINSEY_TARGETS_OF_EWSR1_FLII_FUSION_U   | -0,155 | 2E-05 | 0,00051 | 1 |
| MORF_DNMT1                              | -0,155 | 2E-05 | 0,00019 | 1 |

|                                      |        |       |         |   |
|--------------------------------------|--------|-------|---------|---|
| BIOCARTA_CDC42RAC_PATHWAY            | -0,155 | 2E-05 | 0,0023  | 1 |
| GNF2_ELAC2                           | -0,155 | 2E-05 | 0,00043 | 1 |
| GSE30962_ACUTE_VS_CHRONIC_LCMV_PRIM  | -0,155 | 2E-05 | 0,00054 | 1 |
| ZUCCHI_METASTASIS_UP                 | -0,155 | 2E-05 | 0,00021 | 1 |
| GSE17974_CTRL_VS_ACT_IL4_AND_ANTI_IL | -0,154 | 2E-05 | 0,00076 | 1 |
| WAESCH_ANAPHASE_PROMOTING_COMPLEX    | -0,154 | 2E-05 | 0,01468 | 1 |
| GSE17721_CPG_VS_GARDIQUIMOD_1H_BMDM  | -0,154 | 2E-05 | 0,00028 | 1 |
| GNF2_KPNB1                           | -0,154 | 2E-05 | 0,00163 | 1 |
| V\$ALX4_01                           | -0,154 | 2E-05 | 0,00022 | 1 |
| WANG_RESPONSE_TO_GSK3_INHIBITOR_SB21 | -0,154 | 2E-05 | 0,00036 | 1 |
| REACTOME_CHROMOSOME_MAINTENANCE      | -0,154 | 2E-05 | 0,00113 | 1 |
| CAIRO_HEPATOBLASTOMA_CLASSES_UP      | -0,154 | 3E-05 | 0,00018 | 1 |
| LY_AGING_OLD_DN                      | -0,154 | 3E-05 | 0,00019 | 1 |
| BIOCARTA_RHO_PATHWAY                 | -0,154 | 3E-05 | 0,00016 | 1 |
| GSE3982_EOSINOPHIL_VS_MAST_CELL_DN   | -0,154 | 3E-05 | 0,00077 | 1 |
| GSE3982_MEMORY_CD4_TCELL_VS_TH2_DN   | -0,154 | 3E-05 | 0,00054 | 1 |
| GSE3982_NKCELL_VS_TH2_DN             | -0,154 | 3E-05 | 0,00034 | 1 |
| GCM_PPP1CC                           | -0,153 | 3E-05 | 0,00095 | 1 |
| GSE10239_NAIVE_VS_DAY4.5_EFF_CD8_TCI | -0,153 | 3E-05 | 0,00016 | 1 |
| ROESSLER_LIVER_CANCER_METASTASIS_DN  | -0,153 | 3E-05 | 0,00026 | 1 |
| JACKSON_DNMT1_TARGETS_UP             | -0,153 | 3E-05 | 0,00026 | 1 |
| MYLLYKANGAS_AMPLIFICATION_HOT_SPOT_1 | -0,153 | 3E-05 | 0,00123 | 1 |
| NAKAMURA_METASTASIS_MODEL_UP         | -0,153 | 3E-05 | 0,00088 | 1 |
| MODULE_53                            | -0,153 | 3E-05 | 0,00025 | 1 |
| JACKSON_DNMT1_TARGETS_DN             | -0,153 | 3E-05 | 0,00026 | 1 |
| V\$CETS1P54_01                       | -0,153 | 3E-05 | 0,00016 | 1 |
| chr2p16                              | -0,152 | 3E-05 | 0,00174 | 1 |
| TESAR_ALK_AND_JAK_TARGETS_MOUSE_ES.  | -0,152 | 3E-05 | 0,00104 | 1 |
| GSE13306_TREG_VS_TCONV_DN            | -0,152 | 3E-05 | 0,00026 | 1 |
| GSE3982_BASOPHIL_VS_TH1_DN           | -0,152 | 3E-05 | 0,00159 | 1 |
| YAO_TEMPORAL_RESPONSE_TO_PROGESTERC  | -0,152 | 3E-05 | 0,00244 | 1 |
| VANTVEER_BREAST_CANCER_ESR1_DN       | -0,152 | 3E-05 | 0,00063 | 1 |
| GSE25087_FETAL_VS_ADULT_TREG_UP      | -0,152 | 3E-05 | 0,00152 | 1 |
| MICROBODY_MEMBRANE                   | 0,152  | 3E-05 | 0,00035 | 1 |
| PEROXISOMAL_MEMBRANE                 | 0,152  | 3E-05 | 0,00035 | 1 |
| DANG_MYC_TARGETS_UP                  | -0,152 | 3E-05 | 0,00064 | 1 |
| SPINDLE_ORGANIZATION_AND_BIOGENESIS  | -0,152 | 3E-05 | 0,00019 | 1 |
| GSE17721_CTRL_VS_GARDIQUIMOD_6H_BMC  | -0,152 | 3E-05 | 0,00058 | 1 |
| CHROMOSOMAL_PART                     | -0,152 | 3E-05 | 0,00015 | 1 |
| REACTOME_AMINO_ACID_TRANSPORT_ACROS  | -0,151 | 3E-05 | 0,00049 | 1 |
| GSE12845_IGD_POS_BLOOD_VS_PRE_GC_TC  | -0,151 | 3E-05 | 0,00025 | 1 |
| MORF_TERF1                           | -0,151 | 4E-05 | 0,00069 | 1 |

|                                       |        |       |         |   |
|---------------------------------------|--------|-------|---------|---|
| LIANG_SILENCED_BY_METHYLATION_UP      | -0,151 | 4E-05 | 0,00016 | 1 |
| MCMURRAY_TP53_HRAS_COOPERATION_RESF   | -0,151 | 4E-05 | 0,00072 | 1 |
| TRANSCRIPTION_FACTOR_COMPLEX          | -0,151 | 4E-05 | 0,00047 | 1 |
| REACTOME_INTEGRATION_OF_PROVIRUS      | -0,151 | 4E-05 | 0,00111 | 1 |
| MODULE_392                            | -0,151 | 4E-05 | 0,00051 | 1 |
| GSE16522_ANTI_CD3CD28_STIM_VS_UNSTIM  | -0,151 | 4E-05 | 0,00055 | 1 |
| HE_PTEN_TARGETS_UP                    | -0,151 | 4E-05 | 0,0002  | 1 |
| SUNG_METASTASIS_STROMA_DN             | -0,15  | 4E-05 | 0,00128 | 1 |
| TESAR_ALK_TARGETS_EPISC_4D_UP         | -0,15  | 4E-05 | 0,00191 | 1 |
| CHARAFE_BREAST_CANCER_LUMINAL_VS_ME   | -0,15  | 4E-05 | 0,00026 | 1 |
| FIGUEROA_AML_METHYLATION_CLUSTER_5_I  | -0,15  | 4E-05 | 0,00087 | 1 |
| MONNIER_POSTRADIATION_TUMOR_ESCAPE_I  | -0,15  | 4E-05 | 0,0011  | 1 |
| MODULE_153                            | -0,15  | 4E-05 | 0,00145 | 1 |
| ZAMORA_NOS2_TARGETS_UP                | -0,15  | 4E-05 | 0,00073 | 1 |
| REACTOME_ZINC_TRANSPORTERS            | 0,15   | 4E-05 | 0,00016 | 1 |
| INTEGRAL_TO_ORGANELLE_MEMBRANE        | 0,15   | 4E-05 | 0,00035 | 1 |
| BIOCARTA_SKP2E2F_PATHWAY              | -0,15  | 4E-05 | 0,00108 | 1 |
| REACTOME_DEADENYLATION_DEPENDENT_MF   | -0,15  | 4E-05 | 0,00118 | 1 |
| GCM_AQP4                              | -0,15  | 4E-05 | 0,00014 | 1 |
| MORF_ACP1                             | -0,15  | 4E-05 | 0,00102 | 1 |
| chr15q25                              | -0,149 | 4E-05 | 0,00057 | 1 |
| chr6p22                               | -0,149 | 4E-05 | 0,00591 | 1 |
| GSE17974_0H_VS_6H_IN_VITRO_ACT_CD4_   | -0,149 | 4E-05 | 0,00458 | 1 |
| GSE17721_LPS_VS_CPG_4H_BMDM_DN        | -0,149 | 4E-05 | 0,0069  | 1 |
| HUPER_BREAST_BASAL_VS_LUMINAL_UP      | -0,149 | 4E-05 | 0,00368 | 1 |
| SENGUPTA_NASOPHARYNGEAL_CARCINOMA_    | -0,149 | 4E-05 | 0,00041 | 1 |
| CALMODULIN_BINDING                    | -0,149 | 4E-05 | 0,00019 | 1 |
| TRANSCRIPTION_INITIATION_FROM_RNA_POL | -0,149 | 4E-05 | 0,00178 | 1 |
| MODULE_453                            | -0,149 | 5E-05 | 0,0005  | 1 |
| WU_APOPTOSIS_BY_CDKN1A_VIA_TP53       | -0,149 | 5E-05 | 0,00019 | 1 |
| REACTOME_METABOLISM_OF_PROTEINS       | -0,149 | 5E-05 | 0,00044 | 1 |
| PID_MTOR_4PATHWAY                     | -0,149 | 5E-05 | 0,00204 | 1 |
| VERNELL_RETINOBLASTOMA_PATHWAY_UP     | -0,149 | 5E-05 | 0,00021 | 1 |
| GENERAL_RNA_POLYMERASE_II_TRANSCRIPTI | -0,149 | 5E-05 | 0,00362 | 1 |
| SMITH_TERT_TARGETS_UP                 | -0,149 | 5E-05 | 0,00633 | 1 |
| chr1p32                               | -0,149 | 5E-05 | 0,00013 | 1 |
| GLI1_UP.V1_DN                         | -0,149 | 5E-05 | 0,00346 | 1 |
| SCIBETTA_KDM5B_TARGETS_DN             | -0,149 | 5E-05 | 0,00093 | 1 |
| OSADA_ASCL1_TARGETS_DN                | -0,148 | 5E-05 | 0,00035 | 1 |
| GSE15324_NAIVE_VS_ACTIVATED_ELF4_KO.  | -0,148 | 5E-05 | 0,00069 | 1 |
| BURTON_ADIPOGENESIS_PEAK_AT_24HR      | -0,148 | 5E-05 | 0,00088 | 1 |
| GNF2_TDG                              | -0,148 | 5E-05 | 0,00118 | 1 |



|                                       |        |       |         |   |
|---------------------------------------|--------|-------|---------|---|
| MODULE_503                            | -0,148 | 5E-05 | 0,00017 | 1 |
| PID_SYNDECAN_1_PATHWAY                | -0,148 | 5E-05 | 0,00013 | 1 |
| GSE1460_CD4_THYMOCYTE_VS_THYMIC_STF   | -0,148 | 5E-05 | 0,00021 | 1 |
| G2_M_TRANSITION_OF_MITOTIC_CELL_CYCLI | -0,148 | 5E-05 | 0,00039 | 1 |
| BIERIE_INFLAMMATORY_RESPONSE_TGFB1    | -0,148 | 5E-05 | 0,00099 | 1 |
| MODULE_126                            | -0,148 | 5E-05 | 0,00094 | 1 |
| GGCACTT,MIR-519E                      | -0,148 | 5E-05 | 0,00055 | 1 |
| GSE15930_STIM_VS_STIM_AND_IL-12_24H_  | -0,148 | 5E-05 | 0,00034 | 1 |
| REACTOME_CLEAVAGE_OF_GROWING_TRANS    | -0,148 | 5E-05 | 0,00192 | 1 |
| LINSLEY_MIR16_TARGETS                 | -0,148 | 5E-05 | 0,00017 | 1 |
| STEROID_BIOSYNTHETIC_PROCESS          | -0,148 | 5E-05 | 0,00226 | 1 |
| KANG_FLUOROURACIL_RESISTANCE_DN       | -0,148 | 5E-05 | 0,00177 | 1 |
| KEGG_CYSTEINE_AND_METHIONINE_METABOL  | -0,147 | 5E-05 | 0,00089 | 1 |
| PENG_GlutAMINE_DEPRIVATION_DN         | -0,147 | 5E-05 | 0,00072 | 1 |
| XU_HGF_SIGNALING_NOT_VIA_AKT1_48HR_I  | -0,147 | 5E-05 | 0,00072 | 1 |
| BIOCARTA_RANMS_PATHWAY                | -0,147 | 5E-05 | 0,00023 | 1 |
| GSE1460_NAIVE_CD4_TCELL_CORD_BLOOD_   | -0,147 | 6E-05 | 0,00451 | 1 |
| AMIT_EGF_RESPONSE_480_HELA            | -0,147 | 6E-05 | 0,00089 | 1 |
| LEI_HOXC8_TARGETS_DN                  | -0,147 | 6E-05 | 0,00025 | 1 |
| GSE29615_CTRL_VS_DAY3_LAIV_IFLU_VACI  | -0,147 | 6E-05 | 0,00125 | 1 |
| ZHANG_BREAST_CANCER_PROGENITORS_UP    | -0,147 | 6E-05 | 0,00145 | 1 |
| INTRINSIC_TO_ORGANELLE_MEMBRANE       | 0,147  | 6E-05 | 0,00059 | 1 |
| MATZUK_SPERMATOCYTE                   | -0,147 | 6E-05 | 0,00028 | 1 |
| MORI_PRE_BI_LYMPHOCYTE_UP             | -0,147 | 6E-05 | 0,00014 | 1 |
| GSE29617_CTRL_VS_DAY7_TIV_FLU_VACCI   | -0,147 | 6E-05 | 0,00311 | 1 |
| BRCHAT_RESPONSE_TO_CAMPTOTHECIN_DN    | -0,147 | 6E-05 | 0,00205 | 1 |
| ASTIER_INTEGRIN_SIGNALING             | -0,147 | 6E-05 | 0,00069 | 1 |
| GSE17721_0.5H_VS_24H_POLYIC_BMDM_UP   | -0,147 | 6E-05 | 0,00084 | 1 |
| GNF2_DEK                              | -0,147 | 6E-05 | 0,00107 | 1 |
| REGULATION_OF_JAK_STAT_CASCADE        | -0,147 | 6E-05 | 0,00002 | 1 |
| NEGATIVE_REGULATION_OF_TRANSPORT      | -0,147 | 6E-05 | 0,00032 | 1 |
| GSE12845_NAIVE_VS_DARKZONE_GC_TONSI   | -0,147 | 6E-05 | 0,00046 | 1 |
| MODULE_315                            | -0,147 | 6E-05 | 0,00075 | 1 |
| GSE17974_0H_VS_24H_IN_VITRO_ACT_CD4   | -0,147 | 6E-05 | 0,00062 | 1 |
| WONG_EMBRYONIC_STEM_CELL_CORE         | -0,147 | 6E-05 | 0,00055 | 1 |
| FUJII_YBX1_TARGETS_DN                 | -0,146 | 6E-05 | 0,00034 | 1 |
| ONDER_CDH1_TARGETS_1_DN               | -0,146 | 6E-05 | 0,01263 | 1 |
| GSE17721_LPS_VS_CPG_6H_BMDM_DN        | -0,146 | 6E-05 | 0,00068 | 1 |
| GSE17721_CTRL_VS_LPS_0.5H_BMDM_UP     | -0,146 | 6E-05 | 0,00003 | 1 |
| BURTON_ADIPOGENESIS_PEAK_AT_8HR       | -0,146 | 6E-05 | 0,00078 | 1 |
| DANG_REGULATED_BY_MYC_UP              | -0,146 | 6E-05 | 0,00091 | 1 |
| WEINMANN_ADAPTATION_TO_HYPOXIA_DN     | -0,146 | 6E-05 | 0,00025 | 1 |

|                                        |        |       |         |   |
|----------------------------------------|--------|-------|---------|---|
| BIOCARTA_SRCRPTP_PATHWAY               | -0,146 | 6E-05 | 0,00032 | 1 |
| CYTOKINESIS                            | -0,146 | 6E-05 | 0,00037 | 1 |
| RAO_BOUND_BY_SALL4                     | -0,146 | 6E-05 | 0,00016 | 1 |
| SARRIO_EPITHELIAL_MESENCHYMAL_TRANSIT  | -0,146 | 6E-05 | 0,00038 | 1 |
| REACTOME_RNA_POL_III_TRANSCRIPTION_TEI | -0,146 | 6E-05 | 0,00158 | 1 |
| REGULATION_OF_TYROSINE_PHOSPHORYLATI   | -0,146 | 6E-05 | 0,00018 | 1 |
| GSE14769_20MIN_VS_360MIN_LPS_BMDM_L    | -0,146 | 6E-05 | 0,00059 | 1 |
| GSE11864_CSF1_IFNG_VS_CSF1_PAM3CYS_    | -0,146 | 7E-05 | 0,00084 | 1 |
| AZARE_STAT3_TARGETS                    | -0,146 | 7E-05 | 0,00073 | 1 |
| GSE29614_DAY3_VS_DAY7_TIV_FLU_VACCI    | -0,145 | 7E-05 | 0,00298 | 1 |
| WILLIAMS_ESR2_TARGETS_DN               | -0,145 | 7E-05 | 0,00063 | 1 |
| GSE24634_TEFF_VS_TCONV_DAY5_IN_CULT    | -0,145 | 7E-05 | 0,00057 | 1 |
| NUTT_GBM_VS_AO_GLIOMA_UP               | -0,145 | 7E-05 | 0,00052 | 1 |
| PUJANA_XPRSS_INT_NETWORK               | -0,145 | 7E-05 | 0,00019 | 1 |
| GSE24634_TEFF_VS_TCONV_DAY7_IN_CULT    | -0,145 | 7E-05 | 0,00023 | 1 |
| BURTON_ADIPOGENESIS_3                  | -0,145 | 7E-05 | 0,0002  | 1 |
| REACTOME_PROCESSING_OF_CAPPED_INTRON   | -0,145 | 7E-05 | 0,00118 | 1 |
| KEGG_PANCREATIC_CANCER                 | -0,145 | 7E-05 | 0,00036 | 1 |
| LI_WILMS_TUMOR_ANAPLASTIC_UP           | -0,145 | 7E-05 | 0,00023 | 1 |
| REACTOME_MEIOTIC_RECOMBINATION         | -0,145 | 7E-05 | 0,00433 | 1 |
| MICROTUBULE_ORGANIZING_CENTER          | -0,145 | 7E-05 | 0,00025 | 1 |
| XU_HGF_TARGETS_REPRESSED_BY_AKT1_UP    | -0,145 | 7E-05 | 0,0006  | 1 |
| TYROSINE_PHOSPHORYLATION_OF_STAT_PRC   | -0,145 | 7E-05 | 0,00019 | 1 |
| RAF_UP.V1_UP                           | -0,145 | 7E-05 | 0,0011  | 1 |
| LY_AGING_MIDDLE_DN                     | -0,145 | 7E-05 | 0,00016 | 1 |
| MODULE_127                             | -0,145 | 7E-05 | 0,00675 | 1 |
| XU_RESPONSE_TO_TRETINOIN_AND_NSC682    | -0,145 | 7E-05 | 0,00667 | 1 |
| MODULE_303                             | -0,145 | 7E-05 | 0,00036 | 1 |
| NUCLEOTIDYLTRANSFERASE_ACTIVITY        | -0,145 | 7E-05 | 0,0008  | 1 |
| KEGG_REGULATION_OF_ACTIN_CYTOSKELETC   | -0,145 | 7E-05 | 0,00014 | 1 |
| PROTEIN_AMINO_ACID_LIPIDATION          | 0,145  | 7E-05 | 0,00123 | 1 |
| CHROMOSOME_CONDENSATION                | -0,145 | 7E-05 | 0,00031 | 1 |
| V\$TCF11MAFG_01                        | -0,145 | 7E-05 | 0,00015 | 1 |
| PATIL_LIVER_CANCER                     | -0,145 | 7E-05 | 0,00068 | 1 |
| ZHOU_TNF_SIGNALING_4HR                 | -0,145 | 8E-05 | 0,00187 | 1 |
| GSE7460_CD8_TCELL_VS_TREG_ACT_DN       | -0,144 | 8E-05 | 0,00194 | 1 |
| RASHI_RESPONSE_TO_IONIZING_RADIATION_4 | -0,144 | 8E-05 | 0,00015 | 1 |
| MODULE_32                              | -0,144 | 8E-05 | 0,00048 | 1 |
| REACTOME_RNA_POL_I_RNA_POL_III_AND_M   | -0,144 | 8E-05 | 0,00438 | 1 |
| SHEDDEN_LUNG_CANCER_GOOD_SURVIVAL_     | -0,144 | 8E-05 | 0,00016 | 1 |
| GRAHAM_CML_DIVIDING_VS_NORMAL QUIES    | -0,144 | 8E-05 | 0,00017 | 1 |
| CHIANG_LIVER_CANCER_SUBCLASS_PROLIFEF  | -0,144 | 8E-05 | 0,00075 | 1 |

|                                       |        |       |         |   |
|---------------------------------------|--------|-------|---------|---|
| GSE15659_NAIVE_CD4_TCELL_VS_NONSUPP   | -0,144 | 8E-05 | 0,00039 | 1 |
| MORF_XRCC5                            | -0,144 | 8E-05 | 0,00284 | 1 |
| REGULATION_OF_CELL_CELL_ADHESION      | -0,144 | 8E-05 | 0,00171 | 1 |
| TESAR_ALK_TARGETS_EPISC_3D_UP         | -0,144 | 8E-05 | 0,00364 | 1 |
| MORF_PRKDC                            | -0,144 | 8E-05 | 0,00276 | 1 |
| DASU_IL6_SIGNALING_UP                 | -0,144 | 8E-05 | 0,00039 | 1 |
| SHEDDEN_LUNG_CANCER_POOR_SURVIVAL_    | -0,144 | 8E-05 | 0,00053 | 1 |
| GSE24634_TREG_VS_TCONV_POST_DAY10_    | -0,144 | 8E-05 | 0,00035 | 1 |
| V\$NFY_01                             | -0,144 | 8E-05 | 0,00143 | 1 |
| WILLIAMS_ESR2_TARGETS_UP              | 0,144  | 8E-05 | 0,00089 | 1 |
| CROMER_TUMORIGENESIS_UP               | -0,144 | 8E-05 | 0,00304 | 1 |
| GAJATE_RESPONSE_TO TRABECTEDIN_DN     | -0,143 | 9E-05 | 0,00216 | 1 |
| GSE24634_TREG_VS_TCONV_POST_DAY7_IL   | -0,143 | 9E-05 | 0,00022 | 1 |
| LEE_LIVER_CANCER_MYC_UP               | -0,143 | 9E-05 | 0,00047 | 1 |
| MODULE_321                            | -0,143 | 9E-05 | 0,0005  | 1 |
| GENTILE_UV_RESPONSE_CLUSTER_D8        | -0,143 | 9E-05 | 0,00036 | 1 |
| PEDERSEN_TARGETS_OF_611CTF_ISOFORM_(  | -0,143 | 9E-05 | 0,00202 | 1 |
| GYORFFY_DOXORUBICIN_RESISTANCE        | -0,143 | 9E-05 | 0,00021 | 1 |
| GSE9650_NAIVE_VS_EXHAUSTED_CD8_TCEL   | -0,143 | 9E-05 | 0,00017 | 1 |
| REACTOME_MRNA_PROCESSING              | -0,143 | 9E-05 | 0,00106 | 1 |
| GSE17974_0H_VS_4H_IN_VITRO_ACT_CD4_   | -0,143 | 9E-05 | 0,00255 | 1 |
| LEE_INTRATHYMIC_T_PROGENITOR          | -0,143 | 9E-05 | 0,00014 | 1 |
| GSE22886_NEUTROPHIL_VS_MONOCYTE_UP    | -0,143 | 9E-05 | 0,00018 | 1 |
| GSE3982_MAST_CELL_VS_TH1_DN           | -0,143 | 9E-05 | 0,00025 | 1 |
| REACTOME_FORMATION_OF_TUBULIN_FOLDIN  | -0,143 | 9E-05 | 0,00358 | 1 |
| PEROXISOME_ORGANIZATION_AND_BIOGENESI | 0,143  | 9E-05 | 0,001   | 1 |
| FLECHNER_PBL_KIDNEY_TRANSPLANT_OK_V:  | -0,143 | 9E-05 | 0,00026 | 1 |
| MODULE_281                            | -0,143 | 9E-05 | 0,00214 | 1 |
| WANG_RECURRENT_LIVER_CANCER_UP        | -0,142 | 1E-04 | 0,00087 | 1 |
| POS_HISTAMINE_RESPONSE_NETWORK        | -0,142 | 1E-04 | 0,00088 | 1 |
| WHITFIELD_CELL_CYCLE_S                | -0,142 | 1E-04 | 0,00056 | 1 |
| CHAUHAN_RESPONSE_TO METHOXYESTRADIC   | -0,142 | 1E-04 | 0,00205 | 1 |
| TONKS_TARGETS_OF_RUNX1_RUNX1T1_FUSI   | -0,142 | 1E-04 | 0,0043  | 1 |
| ENK_UV_RESPONSE_EPIDERMIS_UP          | -0,142 | 1E-04 | 0,00865 | 1 |
| BROWN_MYELOID_CELL_DEVELOPMENT_DN     | -0,142 | 1E-04 | 0,00084 | 1 |
| GCM_APEX1                             | -0,142 | 1E-04 | 0,00079 | 1 |
| GSE17974_0.5H_VS_72H_IL4_AND_ANTI_IL  | -0,142 | 1E-04 | 0,00144 | 1 |
| SA_REG_CASCADE_OF_CYCLIN_EXPR         | -0,142 | 1E-04 | 0,00048 | 1 |
| REACTOME_TRANSPORT_OF_INORGANIC_CAT   | -0,142 | 1E-04 | 0,00016 | 1 |
| BIOCARTA_PTDINS_PATHWAY               | -0,142 | 1E-04 | 0,0015  | 1 |
| SENGUPTA_NASOPHARYNGEAL_CARCINOMA_    | -0,142 | 1E-04 | 0,00172 | 1 |
| TRANSCRIPTION_INITIATION              | -0,142 | 1E-04 | 0,00374 | 1 |

|                                      |        |       |         |   |
|--------------------------------------|--------|-------|---------|---|
| REGULATION_OF_PHOSPHORYLATION        | -0,142 | 1E-04 | 0,00013 | 1 |
| WU_CELL_MIGRATION                    | -0,142 | 1E-04 | 0,00112 | 1 |
| BMI1_DN_MEL18_DN.V1_UP               | -0,142 | 1E-04 | 0,00103 | 1 |
| P53_DN.V2_UP                         | -0,142 | 1E-04 | 0,00017 | 1 |
| GSE9006_TYPE_1_DIABETES_AT_DX_VS_1M  | -0,142 | 1E-04 | 0,00013 | 1 |
| GSE12845_IGD_POS_BLOOD_VS_DARKZONE_  | -0,142 | 1E-04 | 0,00843 | 1 |
| NAKAMURA_METASTASIS_MODEL_DN         | -0,142 | 1E-04 | 0,00033 | 1 |
| TANG_SENESCENCE_TP53_TARGETS_DN      | -0,142 | 1E-04 | 0,00032 | 1 |
| CHEMNITZ_RESPONSE_TO_PROSTAGLANDIN_I | -0,142 | 1E-04 | 0,00025 | 1 |
| HOFFMANN_LARGE_TO_SMALL_PRE_BII_LYMI | -0,142 | 1E-04 | 0,0003  | 1 |
| LEIN_OLIGODENDROCYTE_MARKERS         | -0,142 | 1E-04 | 0,00018 | 1 |
| GSE15750_DAY6_VS_DAY10_TRAF6KO_EFF_  | -0,141 | 1E-04 | 0,00026 | 1 |
| CUI_GLUCOSE_DEPRIVATION              | -0,141 | 1E-04 | 0,00892 | 1 |
| HOSHIDA_LIVER_CANCER_LATE_RECURRENCE | -0,141 | 1E-04 | 0,00061 | 1 |
| MODULE_324                           | -0,141 | 1E-04 | 0,00016 | 1 |
| V\$ELK1_02                           | -0,141 | 1E-04 | 0,00203 | 1 |
| MORI_LARGE_PRE_BII_LYMPHOCYTE_UP     | -0,141 | 1E-04 | 0,00023 | 1 |
| GNF2_MSH2                            | -0,141 | 1E-04 | 0,00043 | 1 |
| GNF2_DAP3                            | -0,141 | 1E-04 | 0,00026 | 1 |
| SCIAN_CELL_CYCLE_TARGETS_OF_TP53_ANI | -0,141 | 1E-04 | 0,00014 | 1 |
| TAKAO_RESPONSE_TO_UVB_RADIATION_DN   | -0,141 | 1E-04 | 0,00024 | 1 |
| MODULE_57                            | -0,141 | 1E-04 | 0,00039 | 1 |
| GSE360_DC_VS_MAC_B_MALAYI_LOW_DOSE   | -0,141 | 1E-04 | 0,00019 | 1 |
| GSE1460_DP_THYMOCYTE_VS_NAIVE_CD4_1  | -0,141 | 1E-04 | 0,00083 | 1 |
| PID_REG_GR_PATHWAY                   | -0,141 | 1E-04 | 0,00016 | 1 |
| CHUANG_OXIDATIVE_STRESS_RESPONSE_DN  | -0,141 | 1E-04 | 0,00092 | 1 |
| RIZ_ERYTHROID_DIFFERENTIATION_6HR    | -0,141 | 1E-04 | 0,00044 | 1 |
| KRCTCNNNMANAGC_UNKNOWN               | -0,141 | 1E-04 | 0,0076  | 1 |
| GSE10239_NAIVE_VS_KLRG1INT_EFF_CD8_1 | -0,141 | 1E-04 | 0,00093 | 1 |
| TCGATGG,MIR-213                      | -0,141 | 1E-04 | 0,00083 | 1 |
| CEBALLOS_TARGETS_OF_TP53_AND_MYC_D   | -0,141 | 1E-04 | 0,00036 | 1 |
| GSE24142_EARLY_THYMIC_PROGENITOR_VS_ | -0,141 | 1E-04 | 0,00015 | 1 |
| PETROVA_ENDOTHELIUM_LYMPHATIC_VS_BLI | -0,141 | 1E-04 | 0,00013 | 1 |
| REACTOME_APC_CDC20_MEDIATED_DEGRAD   | -0,141 | 1E-04 | 0,00014 | 1 |
| GSE8515_CTRL_VS_IL1_4H_STIM_MAC_DN   | -0,14  | 1E-04 | 0,00049 | 1 |
| GSE12845_PRE_GC_VS_DARKZONE_GC_TON   | -0,14  | 1E-04 | 0,00051 | 1 |
| GSE17721_POLYIC_VS_CPG_24H_BMDM_DN   | -0,14  | 1E-04 | 0,0211  | 1 |
| REACTOME_SYNTHESIS_OF_VERY_LONG_CHA  | -0,14  | 1E-04 | 0,00015 | 1 |
| OHASHI_AURKB_TARGETS                 | -0,14  | 1E-04 | 0,00052 | 1 |
| REACTOME_GO_AND_EARLY_G1             | -0,14  | 1E-04 | 0,00067 | 1 |
| HOLLMANN_APOPTOSIS_VIA_CD40_UP       | -0,14  | 1E-04 | 0,00123 | 1 |
| GCM_HDAC1                            | -0,14  | 1E-04 | 0,00049 | 1 |

|                                       |        |       |         |   |
|---------------------------------------|--------|-------|---------|---|
| GEORGES_CELL_CYCLE_MIR192_TARGETS     | -0,14  | 1E-04 | 0,00251 | 1 |
| YIH_RESPONSE_TO_ARSENITE_C2           | -0,14  | 1E-04 | 0,00371 | 1 |
| ZEILSTRA_CD44_TARGETS_DN              | -0,14  | 1E-04 | 0,00296 | 1 |
| PID_E2F_PATHWAY                       | -0,14  | 1E-04 | 0,00048 | 1 |
| ZHOU_CELL_CYCLE_GENES_IN_IR_RESPONSE  | -0,14  | 1E-04 | 0,0002  | 1 |
| REACTOME_APC_C_CDC20_MEDIATED_DEGR    | -0,14  | 1E-04 | 0,00023 | 1 |
| REACTOME_AMYLOIDS                     | -0,14  | 1E-04 | 0,00768 | 1 |
| BOGNI_TREATMENT_RELATED_MYELOID_LEUK  | -0,14  | 1E-04 | 0,00092 | 1 |
| APPIERTO_RESPONSE_TO_FENRETINIDE_DN   | -0,14  | 1E-04 | 0,01061 | 1 |
| GSE17721_LPS_VS_POLYIC_4H_BMDM_UP     | -0,14  | 1E-04 | 0,00057 | 1 |
| MORF_CUL1                             | -0,14  | 1E-04 | 0,02192 | 1 |
| POSITIVE_REGULATION_OF_CELL_MIGRATION | -0,14  | 1E-04 | 0,0007  | 1 |
| MORF_RRM1                             | -0,14  | 1E-04 | 0,00116 | 1 |
| MA_MYELOID_DIFFERENTIATION_UP         | -0,14  | 1E-04 | 0,00014 | 1 |
| LU_AGING_BRAIN_DN                     | -0,14  | 1E-04 | 0,00013 | 1 |
| POTTI_ADRIAMYCIN_SENSITIVITY          | -0,14  | 1E-04 | 0,00034 | 1 |
| GNF2_FBL                              | -0,14  | 1E-04 | 0,00026 | 1 |
| BOYERINAS_ONCOFETAL_TARGETS_OF_LET7   | -0,14  | 1E-04 | 0,00697 | 1 |
| BOYALT_LIVER_CANCER_SUBCLASS_G23_U    | -0,14  | 1E-04 | 0,00233 | 1 |
| CHICAS_RB1_TARGETS_LOW_SERUM          | -0,14  | 1E-04 | 0,00117 | 1 |
| MODULE_205                            | -0,14  | 1E-04 | 0,00014 | 1 |
| FRASOR_RESPONSE_TO_SERM_OR_FULVETR    | -0,14  | 1E-04 | 0,00027 | 1 |
| GSE339_EX_VIVO_VS_IN_CULTURE_CD4CD8I  | -0,139 | 1E-04 | 0,00049 | 1 |
| WEI_MYCN_TARGETS_WITH_E_BOX           | -0,139 | 1E-04 | 0,01651 | 1 |
| GSE17721_PAM3CSK4_VS_CPG_6H_BMDM_U    | -0,139 | 1E-04 | 0,00438 | 1 |
| MODULE_54                             | -0,139 | 1E-04 | 0,00059 | 1 |
| TARTE_PLASMA_CELL_VS_PLASMABLAST_DI   | -0,139 | 1E-04 | 0,00389 | 1 |
| GSE17721_POLYIC_VS_CPG_6H_BMDM_UP     | -0,139 | 1E-04 | 0,00299 | 1 |
| GSE20366_TREG_VS_NAIVE_CD4_TCELL_HO   | -0,139 | 1E-04 | 0,00055 | 1 |
| ROY_WOUND_BLOOD_VESSEL_DN             | -0,139 | 1E-04 | 0,00081 | 1 |
| BROWNE_HCMV_INFECTION_12HR_UP         | -0,139 | 1E-04 | 0,00125 | 1 |
| ZHANG_PROLIFERATING_VS QUIESCENT      | -0,139 | 1E-04 | 0,00042 | 1 |
| GSE17721_POLYIC_VS_GARDIQUIMOD_8H_BM  | -0,139 | 1E-04 | 0,0008  | 1 |
| CAMP_UP.V1_DN                         | -0,139 | 1E-04 | 0,00015 | 1 |
| REACTOME_O_LINKED_GLYCOSYLATION_OF_I  | -0,139 | 1E-04 | 0,00376 | 1 |
| HESSON_TUMOR_SUPPRESSOR_CLUSTER_3P2   | 0,139  | 1E-04 | 0,03687 | 1 |
| JIANG_AGING_CEREBRAL_CORTEX_UP        | -0,139 | 1E-04 | 0,0002  | 1 |
| TUOMISTO_TUMOR_SUPPRESSION_BY_COL13   | -0,139 | 1E-04 | 0,00069 | 1 |
| MODULE_403                            | -0,139 | 1E-04 | 0,00035 | 1 |
| chr10q11                              | -0,139 | 1E-04 | 0,00027 | 1 |
| GSE18791_CTRL_VS_NEWCASTLE_VIRUS_DC   | -0,139 | 1E-04 | 0,00393 | 1 |
| GABA_RECEPTOR_ACTIVITY                | -0,139 | 1E-04 | 0,00395 | 1 |

|                                       |        |       |         |   |
|---------------------------------------|--------|-------|---------|---|
| MARTINEZ_RESPONSE_TO_TRABECTEDIN_DN   | -0,139 | 1E-04 | 0,00774 | 1 |
| REACTOME_DEPOSITION_OF_NEW_CENPA_CC   | -0,139 | 1E-04 | 0,00941 | 1 |
| DARWICHE_PAPILLOMA_RISK_LOW_UP        | -0,139 | 1E-04 | 0,00161 | 1 |
| ACOSTA_PROLIFERATION_INDEPENDENT_MYC  | -0,139 | 1E-04 | 0,00252 | 1 |
| GAVIN_FOXP3_TARGETS_CLUSTER_P6        | -0,138 | 2E-04 | 0,00055 | 1 |
| REACTOME_PEROXISOMAL_LIPID_METABOLISM | 0,138  | 2E-04 | 0,00137 | 1 |
| GSE14308_TH2_VS_TH17_UP               | -0,138 | 2E-04 | 0,00348 | 1 |
| BIOSYNTHETIC_PROCESS                  | -0,138 | 2E-04 | 0,00018 | 1 |
| GSE7460_CTRL_VS_FOXP3_OVEREXPR_TCON   | -0,138 | 2E-04 | 0,00025 | 1 |
| REACTOME_L1CAM_INTERACTIONS           | -0,138 | 2E-04 | 0,00025 | 1 |
| GSE3982_CENT_MEMORY_CD4_TCELL_VS_TI   | -0,138 | 2E-04 | 0,0042  | 1 |
| CAGGTCC,MIR-492                       | -0,138 | 2E-04 | 0,00013 | 1 |
| ISHIDA_E2F_TARGETS                    | -0,138 | 2E-04 | 0,00059 | 1 |
| MODULE_68                             | -0,138 | 2E-04 | 0,004   | 1 |
| CELLULAR_BIOSYNTHETIC_PROCESS         | -0,138 | 2E-04 | 0,00035 | 1 |
| YOSHIOKA_LIVER_CANCER_EARLY_RECURREN  | -0,138 | 2E-04 | 0,00722 | 1 |
| STREICHER_LSM1_TARGETS_DN             | -0,138 | 2E-04 | 0,00036 | 1 |
| GSE5463_CTRL_VS_DEXAMETHASONE_TREA    | -0,138 | 2E-04 | 0,00064 | 1 |
| PYEON_HPV_POSITIVE_TUMORS_UP          | -0,138 | 2E-04 | 0,0002  | 1 |
| MICROBODY_PART                        | 0,138  | 2E-04 | 0,0035  | 1 |
| PEROXISOMAL_PART                      | 0,138  | 2E-04 | 0,0035  | 1 |
| PROVENZANI_METASTASIS_DN              | -0,138 | 2E-04 | 0,0013  | 1 |
| V\$TGIF_01                            | -0,138 | 2E-04 | 0,00017 | 1 |
| BANDRES_RESPONSE_TO_CARMUSTIN_MGMT    | -0,138 | 2E-04 | 0,00027 | 1 |
| GCM_ANP32B                            | -0,138 | 2E-04 | 0,00072 | 1 |
| GSE17721_LPS_VS_PAM3CSK4_16H_BMDM     | -0,138 | 2E-04 | 0,00089 | 1 |
| PURBEY_TARGETS_OF_CTBP1_AND_SATB1_L   | -0,138 | 2E-04 | 0,00019 | 1 |
| DNA_DIRECTED_RNA_POLYMERASE_COMPLEX   | -0,138 | 2E-04 | 0,00083 | 1 |
| NUCLEAR_DNA_DIRECTED_RNA_POLYMERASE   | -0,138 | 2E-04 | 0,00083 | 1 |
| RNA_POLYMERASE_COMPLEX                | -0,138 | 2E-04 | 0,00083 | 1 |
| INDUCTION_OF_APOPTOSIS_BY_EXTRACELLUI | -0,138 | 2E-04 | 0,0005  | 1 |
| V\$AP1_Q4                             | -0,138 | 2E-04 | 0,00073 | 1 |
| V\$HLF_01                             | -0,138 | 2E-04 | 0,00017 | 1 |
| IYENGAR_RESPONSE_TO_ADIPOCYTE_FACTOR  | -0,138 | 2E-04 | 0,00243 | 1 |
| HU_GENOTOXIC_DAMAGE_4HR               | -0,138 | 2E-04 | 0,00064 | 1 |
| GAUSSMANN_MLL_AF4_FUSION_TARGETS_E    | -0,138 | 2E-04 | 0,00113 | 1 |
| SENESE_HDAC1_AND_HDAC2_TARGETS_UP     | -0,138 | 2E-04 | 0,00248 | 1 |
| MORI_IMMATURE_B_LYMPHOCYTE_DN         | -0,138 | 2E-04 | 0,00048 | 1 |
| LIPID_BIOSYNTHETIC_PROCESS            | -0,137 | 2E-04 | 0,00113 | 1 |
| GSE3982_EOSINOPHIL_VS_TH1_DN          | -0,137 | 2E-04 | 0,0053  | 1 |
| MITSIADES_RESPONSE_TO_APLIDIN_DN      | -0,137 | 2E-04 | 0,00259 | 1 |
| MODULE_552                            | -0,137 | 2E-04 | 0,0117  | 1 |

|                                      |        |       |         |   |
|--------------------------------------|--------|-------|---------|---|
| DAZARD_UV_RESPONSE_CLUSTER_G4        | -0,137 | 2E-04 | 0,00077 | 1 |
| V\$NRSF_01                           | -0,137 | 2E-04 | 0,00041 | 1 |
| GHANDHI_DIRECT_IRRADIATION_UP        | -0,137 | 2E-04 | 0,00169 | 1 |
| KORKOLA_CORRELATED_WITH_POU5F1       | -0,137 | 2E-04 | 0,00236 | 1 |
| KRAS.LUNG_UP.V1_DN                   | -0,137 | 2E-04 | 0,0004  | 1 |
| KEGG_BASAL_TRANSCRIPTION_FACTORS     | -0,137 | 2E-04 | 0,01015 | 1 |
| GNF2_MCM5                            | -0,137 | 2E-04 | 0,00067 | 1 |
| BIOCARTA_DNAFRAGMENT_PATHWAY         | -0,137 | 2E-04 | 0,00151 | 1 |
| HUANG_GATA2_TARGETS_DN               | -0,137 | 2E-04 | 0,00204 | 1 |
| MODULE_509                           | -0,137 | 2E-04 | 0,01924 | 1 |
| GSE1460_CORD_VS_ADULT_BLOOD_NAIVE_   | -0,137 | 2E-04 | 0,00016 | 1 |
| CROONQUIST_IL6_DEPRIVATION_DN        | -0,137 | 2E-04 | 0,00036 | 1 |
| YE_METASTATIC_LIVER_CANCER           | -0,137 | 2E-04 | 0,00013 | 1 |
| GSE24142_ADULT_VS_FETAL_DN2_THYMOC   | -0,137 | 2E-04 | 0,00029 | 1 |
| DNA_DIRECTED_RNA_POLYMERASEII_HOLOEN | -0,137 | 2E-04 | 0,00293 | 1 |
| V\$HIF1_Q5                           | -0,137 | 2E-04 | 0,00225 | 1 |
| FOURNIER_ACINAR_DEVELOPMENT_LATE_DN  | -0,137 | 2E-04 | 0,00391 | 1 |
| MYC_UP.V1_DN                         | -0,137 | 2E-04 | 0,00015 | 1 |
| GSE29615_CTRL_VS_LAIV_FLU_VACCINE_PE | -0,137 | 2E-04 | 0,00056 | 1 |
| GARGALOVIC_RESPONSE_TO_OXIDIZED_PHOS | -0,137 | 2E-04 | 0,00035 | 1 |
| NUCLEAR_IMPORT                       | -0,137 | 2E-04 | 0,00879 | 1 |
| NFE2L2.V2                            | -0,137 | 2E-04 | 0,00056 | 1 |
| chr16q24                             | -0,137 | 2E-04 | 0,00548 | 1 |
| GSE24634_TREG_VS_TCONV_POST_DAY3_IL  | -0,137 | 2E-04 | 0,00135 | 1 |
| MAYBURD_RESPONSE_TO_L663536_DN       | -0,137 | 2E-04 | 0,00377 | 1 |
| HANN_RESISTANCE_TO_BCL2_INHIBITOR_DN | -0,137 | 2E-04 | 0,00038 | 1 |
| COATED_VESICLE_MEMBRANE              | -0,137 | 2E-04 | 0,00414 | 1 |
| LU_TUMOR_ANGIOGENESIS_UP             | -0,136 | 2E-04 | 0,00342 | 1 |
| GSE360_CTRL_VS_L_DONOVANI_DC_DN      | -0,136 | 2E-04 | 0,00025 | 1 |
| NAKAMURA_CANCER_MICROENVIRONMENT_D   | -0,136 | 2E-04 | 0,00402 | 1 |
| KEGG_DORSO_VENTRAL_AXIS_FORMATION    | -0,136 | 2E-04 | 0,00099 | 1 |
| NAKAYAMA_FRA2_TARGETS                | -0,136 | 2E-04 | 0,00024 | 1 |
| LIANG_HEMATOPOIESIS_STEM_CELL_NUMBER | -0,136 | 2E-04 | 0,00297 | 1 |
| GU_PDEF_TARGETS_UP                   | -0,136 | 2E-04 | 0,00013 | 1 |
| SCHLOSSER_MYC_TARGETS_AND_SERUM_RES  | -0,136 | 2E-04 | 0,01291 | 1 |
| LEE_EARLY_T_LYMPHOCYTE_UP            | -0,136 | 2E-04 | 0,00084 | 1 |
| PYEON_HPV_POSITIVE_TUMORS_DN         | -0,136 | 2E-04 | 0,00029 | 1 |
| KEGG_BLADDER_CANCER                  | -0,136 | 2E-04 | 0,01093 | 1 |
| REACTOME_APOBEC3G_MEDIATED_RESISTAN  | -0,136 | 2E-04 | 0,00148 | 1 |
| REACTOME_METABOLISM_OF_RNA           | -0,136 | 2E-04 | 0,00104 | 1 |
| REACTOME_MITOTIC_G2_G2_M_PHASES      | -0,136 | 2E-04 | 0,00077 | 1 |
| KRAS.DF.V1_UP                        | -0,136 | 2E-04 | 0,00017 | 1 |

|                                       |        |       |         |   |
|---------------------------------------|--------|-------|---------|---|
| GSE10239_MEMORY_VS_KLRG1INT_EFF_CD8   | -0,136 | 2E-04 | 0,00372 | 1 |
| IIZUKA_LIVER_CANCER_PROGRESSION_LO_L1 | -0,136 | 2E-04 | 0,00077 | 1 |
| TURASHVILI_BREAST_NORMAL_DUCTAL_VS_   | -0,136 | 2E-04 | 0,0003  | 1 |
| SATO_SILENCED_BY_METHYLATION_IN_PANC  | -0,136 | 2E-04 | 0,00157 | 1 |
| REACTOME_RNA_POL_III_TRANSCRIPTION    | -0,136 | 2E-04 | 0,00415 | 1 |
| GSE11864_UNTREATED_VS_CSF1_PAM3CYS_   | -0,135 | 2E-04 | 0,00123 | 1 |
| V\$ARNT_02                            | -0,135 | 2E-04 | 0,00348 | 1 |
| ZHANG_TLX_TARGETS_60HR_DN             | -0,135 | 2E-04 | 0,00069 | 1 |
| REACTOME_TERMINATION_OF_O_GLYCAN_BI   | -0,135 | 2E-04 | 0,00207 | 1 |
| KAECH_NAIVE_VS_DAY8_EFF_CD8_TCELL_D   | -0,135 | 2E-04 | 0,00221 | 1 |
| BOYALT_LIVER_CANCER_SUBCLASS_G123_    | -0,135 | 2E-04 | 0,00401 | 1 |
| ZHAN_MULTIPLE_MYELOMA_CD2_DN          | -0,135 | 2E-04 | 0,01228 | 1 |
| FLECHNER_PBL_KIDNEY_TRANSPLANT_REJEC  | -0,135 | 2E-04 | 0,00266 | 1 |
| SCHLOSSER_MYC_TARGETS_AND_SERUM_RE    | -0,135 | 2E-04 | 0,01995 | 1 |
| GNF2_SMC4L1                           | -0,135 | 2E-04 | 0,0006  | 1 |
| chr2p                                 | -0,135 | 2E-04 | 0,00523 | 1 |
| GNF2_MLH1                             | -0,135 | 2E-04 | 0,00592 | 1 |
| FIRESTEIN_PROLIFERATION               | -0,135 | 2E-04 | 0,00069 | 1 |
| chrXq25                               | -0,135 | 2E-04 | 0,00022 | 1 |
| CHANG_CYCLING_GENES                   | -0,135 | 2E-04 | 0,00066 | 1 |
| MODULE_70                             | -0,135 | 2E-04 | 0,00021 | 1 |
| TRANSFERASE_ACTIVITY_TRANSFERRING_GLY | -0,135 | 2E-04 | 0,00654 | 1 |
| KYNG_DNA_DAMAGE_DN                    | -0,135 | 2E-04 | 0,00019 | 1 |
| ZERBINI_RESPONSE_TO_SULINDAC_DN       | -0,135 | 2E-04 | 0,0003  | 1 |
| GSE17721_LPS_VS_PAM3CSK4_1H_BMDM_L    | -0,135 | 2E-04 | 0,00055 | 1 |
| GSE17721_LPS_VS_GARDIQUIMOD_6H_BMDM   | -0,135 | 2E-04 | 0,00546 | 1 |
| KEGG_BUTANOATE_METABOLISM             | 0,135  | 2E-04 | 0,00185 | 1 |
| MODULE_451                            | -0,135 | 2E-04 | 0,0006  | 1 |
| REACTOME_INHIBITION_OF_VOLTAGE_GATED  | -0,135 | 2E-04 | 0,00162 | 1 |
| MODULE_222                            | -0,135 | 2E-04 | 0,03576 | 1 |
| WHITFIELD_CELL_CYCLE_G1_S             | -0,135 | 2E-04 | 0,00042 | 1 |
| PROTEIN_HETERODIMERIZATION_ACTIVITY   | -0,135 | 2E-04 | 0,00094 | 1 |
| chr2p24                               | -0,135 | 2E-04 | 0,00292 | 1 |
| GOLDRATH_NAIVE_VS_MEMORY_CD8_TCELL    | -0,135 | 2E-04 | 0,00035 | 1 |
| LIANG_HEMATOPOIESIS_STEM_CELL_NUMBER  | -0,135 | 2E-04 | 0,00058 | 1 |
| LASTOWSKA_COAMPLIFIED_WITH_MYCN       | -0,135 | 2E-04 | 0,00669 | 1 |
| ZHOU_TNF_SIGNALING_30MIN              | -0,135 | 2E-04 | 0,00049 | 1 |
| THILLAINADESAN_ZNF217_TARGETS_UP      | -0,135 | 2E-04 | 0,00074 | 1 |
| MANALO_HYPOXIA_DN                     | -0,135 | 2E-04 | 0,00298 | 1 |
| GSE17721_POLYIC_VS_CPG_6H_BMDM_DN     | -0,134 | 2E-04 | 0,00029 | 1 |
| MONTERO_THYROID_CANCER_POOR_SURVIVA   | -0,134 | 2E-04 | 0,00139 | 1 |
| MORF_CDK2                             | -0,134 | 2E-04 | 0,01313 | 1 |



|                                        |        |       |         |   |
|----------------------------------------|--------|-------|---------|---|
| REACTOME_TRANSPORT_OF_MATURE_TRANS     | -0,134 | 2E-04 | 0,00611 | 1 |
| GSE17721_LPS_VS_CPG_4H_BMDM_UP         | -0,134 | 2E-04 | 0,00016 | 1 |
| KIM_PTEN_TARGETS_DN                    | -0,134 | 2E-04 | 0,00112 | 1 |
| chr15q                                 | -0,134 | 2E-04 | 0,00755 | 1 |
| AGTCTAG,MIR-151                        | -0,134 | 2E-04 | 0,00018 | 1 |
| GCM_PSME1                              | -0,134 | 2E-04 | 0,00225 | 1 |
| GSE17974_2.5H_VS_72H_IL4_AND_ANTI_IL   | -0,134 | 2E-04 | 0,00068 | 1 |
| chr7q22                                | -0,134 | 2E-04 | 0,00022 | 1 |
| CHOI_ATL_STAGE_PREDICTOR               | -0,134 | 2E-04 | 0,00876 | 1 |
| REACTOME_CRMP5_IN_SEMA3A_SIGNALING     | -0,134 | 2E-04 | 0,00607 | 1 |
| REACTOME_HIV_LIFE_CYCLE                | -0,134 | 2E-04 | 0,00474 | 1 |
| BENPORATH_MYC_TARGETS_WITH_EBOX        | -0,134 | 2E-04 | 0,00141 | 1 |
| MATTIOLI_MGUS_VS_PCL                   | -0,134 | 2E-04 | 0,0052  | 1 |
| CONDENSED_CHROMOSOME                   | -0,134 | 2E-04 | 0,00076 | 1 |
| GOLDRATH_EFF_VS_MEMORY_CD8_TCELL_UI    | -0,134 | 2E-04 | 0,00222 | 1 |
| REACTOME_MRNA_SPLICING                 | -0,134 | 2E-04 | 0,00446 | 1 |
| RODRIGUES_THYROID_CARCINOMA_ANAPLAS    | -0,134 | 2E-04 | 0,03135 | 1 |
| GSE2706_R848_VS_R848_AND_LPS_8H_STI    | -0,134 | 2E-04 | 0,00067 | 1 |
| GOTZMANN_EPITHELIAL_TO_MESENCHYMAL_    | -0,134 | 2E-04 | 0,0019  | 1 |
| PROTEIN_MODIFICATION_PROCESS           | -0,134 | 2E-04 | 0,00016 | 1 |
| MARTORIATI_MDM4_TARGETS_FETAL_LIVER_   | -0,134 | 2E-04 | 0,00018 | 1 |
| PROTEIN_SERINE_THREONINE_KINASE_ACTIVI | -0,134 | 2E-04 | 0,0008  | 1 |
| KUROKAWA_LIVER_CANCER_EARLY_RECURRE    | -0,134 | 3E-04 | 0,01081 | 1 |
| REACTOME_TELOMERE_MAINTENANCE          | -0,134 | 3E-04 | 0,01124 | 1 |
| GSE9006_HEALTHY_VS_TYPE_1_DIABETES_I   | -0,134 | 3E-04 | 0,00165 | 1 |
| REACTOME_ANTIGEN_PROCESSING_UBIQUITIN  | -0,134 | 3E-04 | 0,01205 | 1 |
| GACTGTT,MIR-212,MIR-132                | -0,134 | 3E-04 | 0,00031 | 1 |
| SCHLESINGER_METHYLATED_IN_COLON_CANI   | -0,134 | 3E-04 | 0,00041 | 1 |
| GSE13411_NAIVE_VS_IGM_MEMORY_BCELL_    | -0,134 | 3E-04 | 0,00027 | 1 |
| GSE24634_TREG_VS_TCONV_POST_DAY5_IL    | -0,134 | 3E-04 | 0,00666 | 1 |
| GSE2826_XID_VS_BTK_KO_BCELL_DN         | -0,134 | 3E-04 | 0,00098 | 1 |
| NEMETH_INFLAMMATORY_RESPONSE_LPS_DN    | -0,134 | 3E-04 | 0,0033  | 1 |
| WATANABE_RECTAL_CANCER_RADIOOTHERAP    | -0,134 | 3E-04 | 0,00268 | 1 |
| NITROGEN_COMPOUND_BIOSYNTHETIC_PROCE   | -0,134 | 3E-04 | 0,0003  | 1 |
| HELLER_HDAC_TARGETS_DN                 | -0,134 | 3E-04 | 0,00131 | 1 |
| REACTOME_METABOLISM_OF_POLYAMINES      | -0,133 | 3E-04 | 0,00749 | 1 |
| MARCHINI TRABECTEDIN_RESISTANCE_DN     | -0,133 | 3E-04 | 0,0052  | 1 |
| CHEN_NEUROBLASTOMA_COPY_NUMBER_GAII    | -0,133 | 3E-04 | 0,00013 | 1 |
| WHITE_NEUROBLASTOMA_WITH_1P36.3_DEL    | -0,133 | 3E-04 | 0,00033 | 1 |
| MEIOTIC_RECOMBINATION                  | -0,133 | 3E-04 | 0,00022 | 1 |
| GSE5463_CTRL_VS_DEXAMETHASONE_TREA     | -0,133 | 3E-04 | 0,00024 | 1 |
| KONG_E2F3_TARGETS                      | -0,133 | 3E-04 | 0,00084 | 1 |

|                                      |        |       |         |   |
|--------------------------------------|--------|-------|---------|---|
| GCM_ACTG1                            | -0,133 | 3E-04 | 0,00199 | 1 |
| MORF	EIF4A2                          | -0,133 | 3E-04 | 0,00054 | 1 |
| GSE17721_LPS_VS_GARDIQUIMOD_4H_BMDM  | -0,133 | 3E-04 | 0,00323 | 1 |
| GSE339_CD4POS_VS_CD8POS_DC_IN_CULTU  | -0,133 | 3E-04 | 0,0008  | 1 |
| MODULE_181                           | -0,133 | 3E-04 | 0,00019 | 1 |
| CAHOY_ASTROCYTIC                     | -0,133 | 3E-04 | 0,00081 | 1 |
| GNF2_H2AFX                           | -0,133 | 3E-04 | 0,00048 | 1 |
| GSE17721_LPS_VS_CPG_6H_BMDM_UP       | -0,133 | 3E-04 | 0,00029 | 1 |
| MODULE_298                           | -0,133 | 3E-04 | 0,00538 | 1 |
| KRIGE_RESPONSE_TO_TOSEDOSTAT_6HR_DN  | -0,133 | 3E-04 | 0,00279 | 1 |
| LIANG_SILENCED_BY_METHYLATION_DN     | -0,133 | 3E-04 | 0,00068 | 1 |
| GRUETZMANN_PANCREATIC_CANCER_UP      | -0,133 | 3E-04 | 0,00147 | 1 |
| REACTOME_MEIOTIC_SYNAPSIS            | -0,133 | 3E-04 | 0,01115 | 1 |
| WEST_ADRENOCORTICAL_TUMOR_UP         | -0,133 | 3E-04 | 0,00751 | 1 |
| GSE29618_PRE_VS_DAY7_POST_TIV_FLU_V  | -0,133 | 3E-04 | 0,00028 | 1 |
| PHONG_TNF_RESPONSE_NOT_VIA_P38       | -0,133 | 3E-04 | 0,0006  | 1 |
| KEGG_ENDOMETRIAL_CANCER              | -0,133 | 3E-04 | 0,00038 | 1 |
| GSE17721_PAM3CSK4_VS_CPG_24H_BMDM_   | -0,133 | 3E-04 | 0,00023 | 1 |
| chr2p21                              | -0,133 | 3E-04 | 0,01152 | 1 |
| PID_EPHRINBREVPATHWAY                | -0,133 | 3E-04 | 0,0011  | 1 |
| MGGAAGTG_V\$GABP_B                   | -0,133 | 3E-04 | 0,00019 | 1 |
| GCAAGAC,MIR-431                      | -0,133 | 3E-04 | 0,00222 | 1 |
| E2F3_UP.V1_DN                        | -0,133 | 3E-04 | 0,00048 | 1 |
| REACTOME_CELL_CYCLE_MITOTIC          | -0,133 | 3E-04 | 0,00131 | 1 |
| REACTOME_REGULATION_OF_THE_FANCONI_  | -0,133 | 3E-04 | 0,00321 | 1 |
| WANG_METASTASIS_OF_BREAST_CANCER_E   | -0,133 | 3E-04 | 0,00065 | 1 |
| CROONQUIST_NRAS_SIGNALING_DN         | -0,133 | 3E-04 | 0,0007  | 1 |
| GSE26669_CTRL_VS_COSTIM_BLOCK_MLR_C  | -0,133 | 3E-04 | 0,00163 | 1 |
| GSE17721_12H_VS_24H_PAM3CSK4_BMDM.   | -0,132 | 3E-04 | 0,00092 | 1 |
| PEPTIDYL_TYROSINE_PHOSPHORYLATION    | -0,132 | 3E-04 | 0,00061 | 1 |
| GSE17721_CTRL_VS_CPG_24H_BMDM_UP     | -0,132 | 3E-04 | 0,00015 | 1 |
| NEGATIVE_REGULATION_OF_MAP_KINASE_AC | -0,132 | 3E-04 | 0,00024 | 1 |
| V\$GNCF_01                           | -0,132 | 3E-04 | 0,00056 | 1 |
| GSE3982_CTRL_VS_IGE_STIM_MAST_CELL_I | -0,132 | 3E-04 | 0,00026 | 1 |
| GSE17721_CTRL_VS_LPS_2H_BMDM_DN      | -0,132 | 3E-04 | 0,0003  | 1 |
| REACTOME_PREFOLDIN_MEDIATED_TRANSFER | -0,132 | 3E-04 | 0,01119 | 1 |
| V\$IPF1_Q4                           | -0,132 | 3E-04 | 0,00017 | 1 |
| APRELIKOVA_BRCA1_TARGETS             | -0,132 | 3E-04 | 0,01896 | 1 |
| V\$CEBPB_01                          | -0,132 | 3E-04 | 0,0002  | 1 |
| GNF2_MMP1                            | -0,132 | 3E-04 | 0,01247 | 1 |
| TELOMERIC_DNA_BINDING                | -0,132 | 3E-04 | 0,00099 | 1 |
| ESTABLISHMENT_OF_ORGANELLE_LOCALIZAT | -0,132 | 3E-04 | 0,00207 | 1 |

|                                        |        |       |         |   |
|----------------------------------------|--------|-------|---------|---|
| GSE29618_PRE_VS_DAY7_POST_TIV_FLU_V    | -0,132 | 3E-04 | 0,00022 | 1 |
| LEE_LIVER_CANCER_MYC_TGFA_UP           | -0,132 | 3E-04 | 0,00175 | 1 |
| JNK_DN.V1_UP                           | -0,132 | 3E-04 | 0,00025 | 1 |
| RHODES_UNDIFFERENTIATED_CANCER         | -0,132 | 3E-04 | 0,00187 | 1 |
| KAUFFMANN_DNA_REPAIR_GENES             | -0,132 | 3E-04 | 0,00026 | 1 |
| BURTON_ADIPOGENESIS_PEAK_AT_16HR       | -0,132 | 3E-04 | 0,00272 | 1 |
| ST_FAS_SIGNALING_PATHWAY               | -0,132 | 3E-04 | 0,00358 | 1 |
| GSE27786_BCELL_VS_MONO_MAC_UP          | -0,132 | 3E-04 | 0,00035 | 1 |
| V\$EV11_06                             | -0,132 | 3E-04 | 0,00027 | 1 |
| KEGG_GLYCOSYLPHOSPHATIDYLINOSITOL_GPI  | 0,132  | 3E-04 | 0,00434 | 1 |
| CHROMATIN_MODIFICATION                 | -0,132 | 3E-04 | 0,00226 | 1 |
| MORF_RAD54L                            | -0,132 | 3E-04 | 0,01399 | 1 |
| REACTOME_DESTABILIZATION_OF_MRNA_BY_   | -0,132 | 3E-04 | 0,00139 | 1 |
| SATO_SILENCED_EPIGENETICALLY_IN_PANCRI | -0,132 | 3E-04 | 0,00277 | 1 |
| AMIT_SERUM_RESPONSE_480_MCF10A         | -0,132 | 3E-04 | 0,05391 | 1 |
| MORF_SS18                              | -0,132 | 3E-04 | 0,00044 | 1 |
| GRAHAM_NORMAL QUIESCENT_VS_NORMAL_     | -0,132 | 3E-04 | 0,00107 | 1 |
| GALACTOSYLTRANSFERASE_ACTIVITY         | -0,132 | 3E-04 | 0,00166 | 1 |
| V\$AP1_01                              | -0,132 | 3E-04 | 0,00112 | 1 |
| GCM_NPM1                               | -0,132 | 3E-04 | 0,0004  | 1 |
| GSE29618_BCELL_VS_MONOCYTE_UP          | -0,132 | 3E-04 | 0,0003  | 1 |
| FIGUEROA_AML_METHYLATION_CLUSTER_3_I   | -0,132 | 3E-04 | 0,00036 | 1 |
| YANG_BREAST_CANCER_ESR1_BULK_DN        | -0,132 | 3E-04 | 0,02009 | 1 |
| GNF2_CDC2                              | -0,132 | 3E-04 | 0,00072 | 1 |
| MODULE_168                             | -0,132 | 3E-04 | 0,04122 | 1 |
| REGULATION_OF_RESPONSE_TO_STIMULUS     | -0,131 | 3E-04 | 0,00035 | 1 |
| GNF2_ANP32B                            | -0,131 | 3E-04 | 0,00303 | 1 |
| MORF_BUB1B                             | -0,131 | 3E-04 | 0,00231 | 1 |
| SOUCEK_MYC_TARGETS                     | -0,131 | 3E-04 | 0,00545 | 1 |
| MODULE_328                             | -0,131 | 3E-04 | 0,00201 | 1 |
| VITAMIN_METABOLIC_PROCESS              | -0,131 | 3E-04 | 0,00307 | 1 |
| REACTOME_TANDEM_PORE_DOMAIN_POTASS     | -0,131 | 3E-04 | 0,00044 | 1 |
| GCM_CSNK2B                             | -0,131 | 3E-04 | 0,00263 | 1 |
| RIGGI_EWING_SARCOMA_PROGENITOR_DN      | -0,131 | 3E-04 | 0,00019 | 1 |
| GNF2_PTX3                              | -0,131 | 3E-04 | 0,00101 | 1 |
| REACTOME_SIGNAL_TRANSDUCTION_BY_L1     | -0,131 | 3E-04 | 0,01142 | 1 |
| OKAWA_NEUROBLASTOMA_1P36_31_DELETI     | -0,131 | 3E-04 | 0,00035 | 1 |
| chr2p25                                | -0,131 | 3E-04 | 0,00959 | 1 |
| REACTOME_G1_S_SPECIFIC_TRANSCRIPTION   | -0,131 | 3E-04 | 0,00186 | 1 |
| GSE17721_LPS_VS_POLYIC_8H_BMDM_UP      | -0,131 | 3E-04 | 0,01908 | 1 |
| ST_INTERLEUKIN_4_PATHWAY               | -0,131 | 3E-04 | 0,00038 | 1 |
| GSE17721_4_VS_24H_GARDIQUIMOD_BMDM     | -0,131 | 3E-04 | 0,00036 | 1 |

|                                        |        |       |         |   |
|----------------------------------------|--------|-------|---------|---|
| MORF_RFC1                              | -0,131 | 3E-04 | 0,01635 | 1 |
| GNF2_BUB1                              | -0,131 | 3E-04 | 0,00127 | 1 |
| AMINO_ACID_CATABOLIC_PROCESS           | 0,131  | 3E-04 | 0,00583 | 1 |
| GSE17721_PAM3CSK4_VS_GADIQUIMOD_1H     | -0,131 | 3E-04 | 0,02183 | 1 |
| GNF2_CENPE                             | -0,131 | 3E-04 | 0,00077 | 1 |
| PID_FGF_PATHWAY                        | -0,131 | 3E-04 | 0,00044 | 1 |
| GSE36476_CTRL_VS_TSST_ACT_72H_MEMO     | -0,131 | 3E-04 | 0,0029  | 1 |
| REGULATION_OF_PEPTIDYL_TYROSINE_PHOSF  | -0,131 | 3E-04 | 0,00097 | 1 |
| ZERBINI_RESPONSE_TO_SULINDAC_UP        | -0,131 | 3E-04 | 0,00117 | 1 |
| STEIN_ESRRA_TARGETS_DN                 | -0,131 | 3E-04 | 0,00031 | 1 |
| chr13q31                               | -0,131 | 3E-04 | 0,00409 | 1 |
| GSE3982_MAC_VS_NEUTROPHIL_LPS_STIM_I   | -0,131 | 3E-04 | 0,01102 | 1 |
| BIOCARTA_G2_PATHWAY                    | -0,131 | 3E-04 | 0,00259 | 1 |
| GSE3982_NKCELL_VS_TH1_DN               | -0,131 | 3E-04 | 0,01271 | 1 |
| REACTOME_RNA_POL_I_TRANSCRIPTION       | -0,131 | 3E-04 | 0,01092 | 1 |
| GSE18791_CTRL_VS_NEWCASTLE_VIRUS_DC    | -0,131 | 3E-04 | 0,00339 | 1 |
| GSE18791_CTRL_VS_NEWCASTLE_VIRUS_DC    | -0,131 | 3E-04 | 0,0175  | 1 |
| GSE360_CTRL_VS_B_MALAYI_LOW_DOSE_DI    | -0,131 | 3E-04 | 0,00013 | 1 |
| JIANG_HYPOXIA_VIA_VHL                  | -0,131 | 3E-04 | 0,00495 | 1 |
| GSE36392_TYPE_2_MYELOID_VS_NEUTROPH    | -0,131 | 4E-04 | 0,00059 | 1 |
| FONTAINE_THYROID_TUMOR_UNCERTAIN_MAI   | -0,131 | 4E-04 | 0,00029 | 1 |
| SASSON_RESPONSE_TO_GONADOTROPHINS_I    | -0,131 | 4E-04 | 0,0039  | 1 |
| RASHI_RESPONSE_TO_IONIZING_RADIATION_2 | -0,131 | 4E-04 | 0,00082 | 1 |
| DNA_POLYMERASE_ACTIVITY                | -0,131 | 4E-04 | 0,00022 | 1 |
| GRAHAM_CML_DIVIDING_VS_NORMAL_DIVIDII  | -0,131 | 4E-04 | 0,01987 | 1 |
| AMUNDSON_RESPONSE_TO_ARSENITE          | -0,131 | 4E-04 | 0,00383 | 1 |
| REACTOME_CYCLIN_A_B1_ASSOCIATED_EVEI   | -0,131 | 4E-04 | 0,00118 | 1 |
| RNA_POLYMERASE_II_TRANSCRIPTION_FACTC  | -0,13  | 4E-04 | 0,00029 | 1 |
| DNA_INTEGRITY_CHECKPOINT               | -0,13  | 4E-04 | 0,00206 | 1 |
| KOMMAGANI_TP63_GAMMA_TARGETS           | -0,13  | 4E-04 | 0,001   | 1 |
| TACTTGA,MIR-26A,MIR-26B                | -0,13  | 4E-04 | 0,00031 | 1 |
| GSE17721_0.5H_VS_8H_LPS_BMDM_UP        | -0,13  | 4E-04 | 0,00055 | 1 |
| KANNAN_TP53_TARGETS_DN                 | -0,13  | 4E-04 | 0,05589 | 1 |
| WANG_METASTASIS_OF_BREAST_CANCER       | -0,13  | 4E-04 | 0,01634 | 1 |
| YU_MYC_TARGETS_UP                      | -0,13  | 4E-04 | 0,00156 | 1 |
| SARTIPY_BLUNTED_BY_INSULIN_RESISTANCE  | -0,13  | 4E-04 | 0,00165 | 1 |
| KAN_RESPONSE_TO_ARSENIC_TRIOXIDE       | -0,13  | 4E-04 | 0,00983 | 1 |
| BMI1_DN.V1_UP                          | -0,13  | 4E-04 | 0,00216 | 1 |
| chr1p                                  | -0,13  | 4E-04 | 0,00463 | 1 |
| CHEN_LUNG_CANCER_SURVIVAL              | -0,13  | 4E-04 | 0,00641 | 1 |
| HORMONE_RECEPTOR_BINDING               | -0,13  | 4E-04 | 0,00452 | 1 |
| GNF2_CENPF                             | -0,13  | 4E-04 | 0,00079 | 1 |

|                                       |        |       |         |   |
|---------------------------------------|--------|-------|---------|---|
| TGACCTTG_V\$SF1_Q6                    | -0,13  | 4E-04 | 0,001   | 1 |
| GCM_DDX5                              | -0,13  | 4E-04 | 0,01013 | 1 |
| GSE17721_LPS_VS_POLYIC_1H_BMDM_UP     | -0,13  | 4E-04 | 0,00057 | 1 |
| GSE17974_CTRL_VS_ACT_IL4_AND_ANTI_IL  | -0,13  | 4E-04 | 0,03211 | 1 |
| GCGNNANTTCC_UNKNOWN                   | -0,13  | 4E-04 | 0,00028 | 1 |
| GSE339_CD4POS_VS_CD4CD8DN_DC_DN       | -0,13  | 4E-04 | 0,00133 | 1 |
| RIZ_ERYTHROID_DIFFERENTIATION         | -0,13  | 4E-04 | 0,00103 | 1 |
| DARWICHE_SKIN_TUMOR_PROMOTER_UP       | -0,13  | 4E-04 | 0,00232 | 1 |
| REACTOME_CHONDROITIN_SULFATE_BIOSYNT  | -0,13  | 4E-04 | 0,00069 | 1 |
| DAZARD_UV_RESPONSE_CLUSTER_G6         | -0,13  | 4E-04 | 0,00223 | 1 |
| PACHER_TARGETS_OF_IGF1_AND_IGF2_UP    | -0,13  | 4E-04 | 0,00107 | 1 |
| SONG_TARGETS_OF_IE86_CMV_PROTEIN      | -0,13  | 4E-04 | 0,00124 | 1 |
| MORF_RPA2                             | -0,13  | 4E-04 | 0,01481 | 1 |
| KINASE_ACTIVITY                       | -0,13  | 4E-04 | 0,00018 | 1 |
| KEGG_NON_SMALL_CELL_LUNG_CANCER       | -0,13  | 4E-04 | 0,00388 | 1 |
| V\$AP1_Q2                             | -0,13  | 4E-04 | 0,00032 | 1 |
| MICROTUBULE                           | -0,13  | 4E-04 | 0,0005  | 1 |
| GNF2_PCNA                             | -0,13  | 4E-04 | 0,00086 | 1 |
| JECHLINGER_EPITHELIAL_TO_MESENCHYMAL_ | -0,13  | 4E-04 | 0,00609 | 1 |
| chr4q27                               | -0,13  | 4E-04 | 0,01181 | 1 |
| MANN_RESPONSE_TO_AMIFOSTINE_DN        | -0,13  | 4E-04 | 0,00266 | 1 |
| LIEN_BREAST_CARCINOMA_METAPLASTIC_VS  | -0,13  | 4E-04 | 0,00697 | 1 |
| MYLLYKANGAS_AMPLIFICATION_HOT_SPOT_2  | -0,13  | 4E-04 | 0,00025 | 1 |
| ABRAMSON_INTERACT_WITH_AIRE           | -0,13  | 4E-04 | 0,01021 | 1 |
| BIOGENIC_AMINE_METABOLIC_PROCESS      | -0,13  | 4E-04 | 0,00137 | 1 |
| ONGUSAHA_TP53_TARGETS                 | -0,13  | 4E-04 | 0,00489 | 1 |
| GNF2_RFC3                             | -0,129 | 4E-04 | 0,0013  | 1 |
| REACTOME_RNA_POL_I_PROMOTER_OPENING   | -0,129 | 4E-04 | 0,01264 | 1 |
| SESTO_RESPONSE_TO_UV_C6               | -0,129 | 4E-04 | 0,00052 | 1 |
| NEGATIVE_REGULATION_OF_INTRACELLULAR  | -0,129 | 4E-04 | 0,00139 | 1 |
| MORF_SMC1L1                           | -0,129 | 4E-04 | 0,01602 | 1 |
| GSE22886_NAIVE_CD4_TCELL_VS_NEUTROP   | -0,129 | 4E-04 | 0,00038 | 1 |
| TGASTMAGC_V\$NFE2_01                  | -0,129 | 4E-04 | 0,00044 | 1 |
| NGO_MALIGNANT_GLIOMA_1P_LOH           | -0,129 | 4E-04 | 0,0589  | 1 |
| REACTOME_G2_M_DNA_DAMAGE_CHECKPOIN    | -0,129 | 4E-04 | 0,00105 | 1 |
| BROWNE_HCMV_INFECTION_8HR_DN          | -0,129 | 4E-04 | 0,00221 | 1 |
| GSE36476_YOUNG_VS_OLD_DONOR_MEMOR     | -0,129 | 4E-04 | 0,0017  | 1 |
| GNF2_RRM1                             | -0,129 | 4E-04 | 0,0014  | 1 |
| FONTAINE_THYROID_TUMOR_UNCERTAIN_MAI  | -0,129 | 4E-04 | 0,00096 | 1 |
| JOHANSSON_GLIOMAGENESIS_BY_PDGFB_DN   | -0,129 | 4E-04 | 0,00061 | 1 |
| LOPEZ_MESOTHELIOMA_SURVIVAL_DN        | -0,129 | 4E-04 | 0,01892 | 1 |
| REACTOME_DOWNREGULATION_OF_SMAD2_3    | -0,129 | 4E-04 | 0,00144 | 1 |

|                                       |        |       |         |   |
|---------------------------------------|--------|-------|---------|---|
| ZHAN_MULTIPLE_MYELOMA_MS_DN           | -0,129 | 4E-04 | 0,00336 | 1 |
| LEE_METASTASIS_AND_RNA_PROCESSING_UF  | -0,129 | 4E-04 | 0,01019 | 1 |
| GNF2_TTK                              | -0,129 | 4E-04 | 0,00112 | 1 |
| GNF2_CCNA2                            | -0,129 | 4E-04 | 0,0011  | 1 |
| GNF2_CKS1B                            | -0,129 | 4E-04 | 0,00188 | 1 |
| KUMAR_PATHOGEN_LOAD_BY_MACROPHAGE:    | -0,129 | 4E-04 | 0,00033 | 1 |
| BOYALT_LIVER_CANCER_SUBCLASS_G3_UP    | -0,129 | 4E-04 | 0,01759 | 1 |
| RIZKI_TUMOR_INVASIVENESS_3D_DN        | -0,129 | 4E-04 | 0,00115 | 1 |
| DNA_DAMAGE_RESPONSESIGNAL_TRANSDUC    | -0,129 | 4E-04 | 0,00039 | 1 |
| IKEDA_MIR30_TARGETS_DN                | -0,129 | 4E-04 | 0,001   | 1 |
| HOEBEKE_LYMPHOID_STEM_CELL_DN         | -0,129 | 4E-04 | 0,00037 | 1 |
| REGULATION_OF_PROTEIN_MODIFICATION_PR | -0,129 | 4E-04 | 0,00029 | 1 |
| GSE17974_CTRL_VS_ACT_IL4_AND_ANTI_IL  | -0,129 | 4E-04 | 0,01305 | 1 |
| GSE3982_MAC_VS_NEUTROPHIL_UP          | -0,129 | 4E-04 | 0,03139 | 1 |
| MOLENAAR_TARGETS_OF_CCND1_AND_CDK4    | -0,129 | 4E-04 | 0,00244 | 1 |
| CCAGGTT,MIR-490                       | -0,129 | 4E-04 | 0,00611 | 1 |
| DAVIES_MULTIPLE_MYELOMA_VS_MGUS_UP    | -0,129 | 4E-04 | 0,00026 | 1 |
| GRAHAM_CML_QUIESCENT_VS_NORMAL_QUIE   | -0,129 | 4E-04 | 0,00239 | 1 |
| MITOTIC_SISTER_CHROMATID_SEGREGATION  | -0,129 | 4E-04 | 0,0023  | 1 |
| GRAEMANN_RETINOBLASTOMA_WITH_6P_AI    | -0,129 | 4E-04 | 0,0146  | 1 |
| SHAFFER_IRF4_TARGETS_IN_ACTIVATED_DEM | -0,129 | 4E-04 | 0,01143 | 1 |
| BIOCARTA_PARKIN_PATHWAY               | -0,129 | 4E-04 | 0,00029 | 1 |
| MORF_BUB3                             | -0,129 | 4E-04 | 0,01468 | 1 |
| WINNEPENNINGKX_MELANOMA_METASTASIS_   | -0,129 | 4E-04 | 0,00323 | 1 |
| WANG_BARRETTES_ESOPHAGUS_AND_ESOPHA   | -0,129 | 4E-04 | 0,00573 | 1 |
| GSE7852_TREG_VS_TCONV_FAT_DN          | -0,129 | 4E-04 | 0,00035 | 1 |
| REACTOME_MITOTIC_G1_G1_S_PHASES       | -0,129 | 4E-04 | 0,00543 | 1 |
| GSE31082_DP_VS_CD8_SP_THYMOCYTE_UP    | -0,129 | 4E-04 | 0,00028 | 1 |
| GSE17721_12H_VS_24H_POLYIC_BMDM_UP    | -0,129 | 4E-04 | 0,00198 | 1 |
| GSE3982_EFF_MEMORY_CD4_TCELL_VS_TH1   | -0,129 | 4E-04 | 0,01825 | 1 |
| PID_RAC1_PATHWAY                      | -0,129 | 4E-04 | 0,0141  | 1 |
| GNF2_HMMR                             | -0,129 | 4E-04 | 0,00143 | 1 |
| REACTOME_LOSS_OF_NLP_FROM_MITOTIC_C   | -0,129 | 4E-04 | 0,00425 | 1 |
| MORF_GNB1                             | -0,128 | 4E-04 | 0,01955 | 1 |
| ATACTGT,MIR-144                       | -0,128 | 4E-04 | 0,00039 | 1 |
| GRAHAM_CML_QUIESCENT_VS_NORMAL_DIVI   | -0,128 | 4E-04 | 0,00136 | 1 |
| EGUCHI_CELL_CYCLE_RB1_TARGETS         | -0,128 | 4E-04 | 0,00151 | 1 |
| KAECH_DAY8_EFF_VS_DAY15_EFF_CD8_TCE   | -0,128 | 4E-04 | 0,00426 | 1 |
| GSE17721_LPS_VS_POLYIC_12H_BMDM_UP    | -0,128 | 4E-04 | 0,01537 | 1 |
| MORF_CCNI                             | -0,128 | 4E-04 | 0,00167 | 1 |
| PID_EPHA_FWDPATHWAY                   | -0,128 | 5E-04 | 0,00091 | 1 |
| MORI_SMALL_PRE_BII_LYMPHOCYTE_DN      | -0,128 | 5E-04 | 0,01843 | 1 |

|                                        |        |       |         |   |
|----------------------------------------|--------|-------|---------|---|
| PID_PRLSIGNALINGEVENTSPATHWAY          | -0,128 | 5E-04 | 0,00491 | 1 |
| GSE17721_LPS_VS_CPG_12H_BMDM_DN        | -0,128 | 5E-04 | 0,00077 | 1 |
| IWANAGA_E2F1_TARGETS_INDUCED_BY_SER    | -0,128 | 5E-04 | 0,00384 | 1 |
| MARIADASON_REGULATED_BY_HISTONE_ACE    | -0,128 | 5E-04 | 0,00042 | 1 |
| GSE20715_WT_VS_TLR4_KO_6H_OZONE_LL     | -0,128 | 5E-04 | 0,00015 | 1 |
| GSE10325_BCELL_VS_MYELOID_UP           | -0,128 | 5E-04 | 0,00027 | 1 |
| MEINHOLD_OVARIAN_CANCER_LOW_GRADE__    | -0,128 | 5E-04 | 0,00288 | 1 |
| REACTOME_INHIBITION_OF_THE_PROTEOLYTI  | -0,128 | 5E-04 | 0,0011  | 1 |
| FINETTI_BREAST_CANCER_KINOME_RED       | -0,128 | 5E-04 | 0,00262 | 1 |
| HILLION_HMGA1_TARGETS                  | -0,128 | 5E-04 | 0,0004  | 1 |
| ZHOU_CELL_CYCLE_GENES_IN_IR_RESPONSE_  | -0,128 | 5E-04 | 0,00087 | 1 |
| MCCLUNG_COCAIN_REWARD_4WK              | -0,128 | 5E-04 | 0,00074 | 1 |
| GNF2_FEN1                              | -0,128 | 5E-04 | 0,00115 | 1 |
| GSE17974_0H_VS_12H_IN_VITRO_ACT_CD4    | -0,128 | 5E-04 | 0,01454 | 1 |
| GSE13493_DP_VS_CD8POS_THYMOCYTE_DN     | -0,128 | 5E-04 | 0,00099 | 1 |
| GSE7460_WT_VS_FOXP3_HET_ACT_WITH_T     | -0,128 | 5E-04 | 0,00066 | 1 |
| V\$ROAZ_01                             | -0,128 | 5E-04 | 0,00661 | 1 |
| PID_PDGFRA_PATHWAY                     | -0,128 | 5E-04 | 0,00032 | 1 |
| HELLER_SILENCED_BY_METHYLATION_DN      | -0,128 | 5E-04 | 0,00186 | 1 |
| MODULE_7                               | -0,128 | 5E-04 | 0,00058 | 1 |
| BIOCARTA_RANKL_PATHWAY                 | -0,128 | 5E-04 | 0,0078  | 1 |
| SCHMIDT_POR_TARGETS_IN_LIMB_BUD_UP     | -0,128 | 5E-04 | 0,02359 | 1 |
| GOLDRATH_NAIVE_VS_EFF_CD8_TCELL_DN     | -0,128 | 5E-04 | 0,00456 | 1 |
| MODULE_16                              | -0,128 | 5E-04 | 0,0059  | 1 |
| DARWICHE_PAPILLOMA_RISK_HIGH_UP        | -0,128 | 5E-04 | 0,00531 | 1 |
| GNF2_SMC2L1                            | -0,128 | 5E-04 | 0,00127 | 1 |
| GSE32423_MEMORY_VS_NAIVE_CD8_TCELL_    | -0,128 | 5E-04 | 0,00127 | 1 |
| LI_CISPLATIN_RESISTANCE_UP             | -0,127 | 5E-04 | 0,00042 | 1 |
| MODULE_385                             | -0,127 | 5E-04 | 0,00149 | 1 |
| GSE7852_LN_VS_FAT_TREG_UP              | -0,127 | 5E-04 | 0,00151 | 1 |
| RESPONSE_TO_IONIZING_RADIATION         | -0,127 | 5E-04 | 0,00121 | 1 |
| DEBIASI_APOPTOSIS_BY_REOVIRUS_INFECTIO | -0,127 | 5E-04 | 0,00165 | 1 |
| GNF2_CCNB2                             | -0,127 | 5E-04 | 0,00137 | 1 |
| MEIOSIS_I                              | -0,127 | 5E-04 | 0,00062 | 1 |
| SMIRNOV_RESPONSE_TO_IR_6HR_DN          | -0,127 | 5E-04 | 0,00146 | 1 |
| MORF_ESPL1                             | -0,127 | 5E-04 | 0,00274 | 1 |
| KEGG_VALINE_LEUCINE_AND_ISOLEUCINE_DE  | 0,127  | 5E-04 | 0,01542 | 1 |
| MCCABE_HOXC6_TARGETS_DN                | -0,127 | 5E-04 | 0,00045 | 1 |
| V\$AP1FJ_Q2                            | -0,127 | 5E-04 | 0,00039 | 1 |
| PHOSPHOINOSITIDE_MEDIATED_SIGNALING    | -0,127 | 5E-04 | 0,00018 | 1 |
| GSE22886_NAIVE_BCELL_VS_BLOOD_PLASM    | -0,127 | 5E-04 | 0,07271 | 1 |
| SPLICEOSOME_ASSEMBLY                   | -0,127 | 5E-04 | 0,00471 | 1 |

|                                      |        |       |         |   |
|--------------------------------------|--------|-------|---------|---|
| GSE17721_POLYIC_VS_CPG_8H_BMDM_DN    | -0,127 | 5E-04 | 0,00542 | 1 |
| PID_PLK1_PATHWAY                     | -0,127 | 5E-04 | 0,00213 | 1 |
| SANDERSON_PPARA_TARGETS              | 0,127  | 5E-04 | 0,04707 | 1 |
| CHIARADONNA_NEOPLASTIC_TRANSFORMATI  | -0,127 | 5E-04 | 0,0108  | 1 |
| GNF2_MKI67                           | -0,127 | 5E-04 | 0,00145 | 1 |
| REACTOME_RNA_POL_II_TRANSCRIPTION    | -0,127 | 5E-04 | 0,01395 | 1 |
| NEGATIVE_REGULATION_OF_DEVELOPMENTAI | -0,127 | 5E-04 | 0,00024 | 1 |
| CHEN_ETV5_TARGETS_TESTIS             | -0,127 | 5E-04 | 0,00601 | 1 |
| GNF2_CDC20                           | -0,127 | 5E-04 | 0,00158 | 1 |
| AMINE_CATABOLIC_PROCESS              | 0,127  | 5E-04 | 0,01459 | 1 |
| GSE36476_CTRL_VS_TSST_ACT_72H_MEMO   | -0,127 | 5E-04 | 0,00318 | 1 |
| PHOSPHOTRANSFERASE_ACTIVITY_ALCOHOL_ | -0,127 | 5E-04 | 0,00031 | 1 |
| chr3q25                              | -0,127 | 5E-04 | 0,02969 | 1 |
| PUJANA_BRCA_CENTERED_NETWORK         | -0,127 | 5E-04 | 0,00267 | 1 |
| BROWNE_HCMV_INFECTION_18HR_UP        | -0,127 | 5E-04 | 0,00064 | 1 |
| GRADE_COLON_AND_RECTAL_CANCER_UP     | -0,127 | 5E-04 | 0,04014 | 1 |
| GNF2_RRM2                            | -0,127 | 5E-04 | 0,00165 | 1 |
| V\$MYOGNF1_01                        | -0,127 | 5E-04 | 0,00034 | 1 |
| ENK_UV_RESPONSE_KERATINOCYTE_DN      | -0,127 | 5E-04 | 0,0073  | 1 |
| POSITIVE_REGULATION_OF_CELL_ADHESION | -0,127 | 5E-04 | 0,0002  | 1 |
| GSE3982_MEMORY_CD4_TCELL_VS_TH1_DN   | -0,127 | 5E-04 | 0,0224  | 1 |
| GSE34205_HEALTHY_VS_RSV_INF_INFANT_F | -0,127 | 5E-04 | 0,02096 | 1 |
| POSITIVE_REGULATION_OF_HYDROLASE_ACT | -0,127 | 5E-04 | 0,00103 | 1 |
| KYNG_WERNER_SYNDROM_AND_NORMAL_AG    | -0,127 | 5E-04 | 0,00131 | 1 |
| GSE17721_CTRL_VS_CPG_8H_BMDM_DN      | -0,127 | 5E-04 | 0,00035 | 1 |
| GSE29618_LAIV_VS_TIV_FLU_VACCINE_DAY | -0,127 | 5E-04 | 0,00029 | 1 |
| GSE2826_WT_VS_BTK_KO_BCELL_UP        | -0,127 | 5E-04 | 0,00046 | 1 |
| GSE3982_CTRL_VS_PMA_STIM_EOSINOPHIL_ | -0,127 | 5E-04 | 0,00021 | 1 |
| XU_HGF_TARGETS_INDUCED_BY_AKT1_48HR  | -0,127 | 5E-04 | 0,00014 | 1 |
| NUCLEASE_ACTIVITY                    | -0,127 | 5E-04 | 0,00271 | 1 |
| GSE32423_CTRL_VS_IL7_IL4_MEMORY_CD8_ | -0,127 | 5E-04 | 0,00022 | 1 |
| GSE17721_4H_VS_24H_POLYIC_BMDM_UP    | -0,127 | 5E-04 | 0,00552 | 1 |
| RODRIGUES_THYROID_CARCINOMA_POORLY_I | -0,127 | 5E-04 | 0,04186 | 1 |
| GSE17721_CTRL_VS_POLYIC_12H_BMDM_DN  | -0,127 | 5E-04 | 0,00068 | 1 |
| VICENT_METASTASIS_UP                 | -0,127 | 5E-04 | 0,00118 | 1 |
| GU_PDEF_TARGETS_DN                   | -0,127 | 5E-04 | 0,06513 | 1 |
| GSE8868_SPLEEN_VS_INTESTINE_CD11B_PO | -0,127 | 5E-04 | 0,0003  | 1 |
| BONCI_TARGETS_OF_MIR15A_AND_MIR16_1  | -0,127 | 5E-04 | 0,00153 | 1 |
| GSE17721_0.5H_VS_12H_POLYIC_BMDM_UP  | -0,126 | 5E-04 | 0,00115 | 1 |
| WORSCHER_TUMOR_REJECTION_DN          | -0,126 | 5E-04 | 0,00611 | 1 |
| GNF2_CKS2                            | -0,126 | 5E-04 | 0,00149 | 1 |
| REACTOME_PURINE_METABOLISM           | -0,126 | 5E-04 | 0,04284 | 1 |



|                                               |        |       |         |   |
|-----------------------------------------------|--------|-------|---------|---|
| GNF2_MCM4                                     | -0,126 | 6E-04 | 0,00143 | 1 |
| NUYTEN_NIPP1_TARGETS_UP                       | -0,126 | 6E-04 | 0,0015  | 1 |
| PHOSPHOINOSITIDE_BIOSYNTHETIC_PROCESS         | 0,126  | 6E-04 | 0,00647 | 1 |
| GNF2_ESPL1                                    | -0,126 | 6E-04 | 0,00224 | 1 |
| RIBONUCLEASE_ACTIVITY                         | -0,126 | 6E-04 | 0,02404 | 1 |
| NUCLEAR_HORMONE_RECEPTOR_BINDING              | -0,126 | 6E-04 | 0,00628 | 1 |
| REACTOME_ASSOCIATION_OF_LICENSING_FACTORS     | -0,126 | 6E-04 | 0,00247 | 1 |
| GSE17721_CTRL_VS_PAM3CSK4_12H_BMDM            | -0,126 | 6E-04 | 0,00449 | 1 |
| REACTOME_POST_CHAPERONIN_TUBULIN_FOLDING      | -0,126 | 6E-04 | 0,00196 | 1 |
| BERTUCCI_INVASIVE_CARCINOMA_DUCTAL_VARIANT    | -0,126 | 6E-04 | 0,05457 | 1 |
| REICHERT_MITOSIS_LIN9_TARGETS                 | -0,126 | 6E-04 | 0,00384 | 1 |
| MODULE_563                                    | 0,126  | 6E-04 | 0,00938 | 1 |
| GSE32423_CTRL_VS_IL4_MEMORY_CD8_TCELLS        | -0,126 | 6E-04 | 0,00145 | 1 |
| GSE8868_SPLEEN_VS_INTESTINE_CD11B_POSITIVE    | -0,126 | 6E-04 | 0,00025 | 1 |
| YAMAZAKI_TCEB3_TARGETS_UP                     | -0,126 | 6E-04 | 0,00047 | 1 |
| GSE17721_LPS_VS_CPG_24H_BMDM_DN               | -0,126 | 6E-04 | 0,00174 | 1 |
| ATAAGCT,MIR-21                                | -0,126 | 6E-04 | 0,00018 | 1 |
| GNF2_RFC4                                     | -0,126 | 6E-04 | 0,00179 | 1 |
| GRAHAM_CML_DIVIDING_VS_NORMAL_DIVIDING        | -0,126 | 6E-04 | 0,00097 | 1 |
| REICHERT_G1S_REGULATORS_AS_PI3K_TARGETS       | -0,126 | 6E-04 | 0,0032  | 1 |
| TERAMOTO_OPN_TARGETS_CLUSTER_7                | -0,126 | 6E-04 | 0,04988 | 1 |
| GSE22886_UNSTIM_VS_IL15_STIM_NKCELLS          | -0,126 | 6E-04 | 0,02094 | 1 |
| GSE15930_STIM_VS_STIM_AND_TRICHOSTATIN        | -0,126 | 6E-04 | 0,0003  | 1 |
| ZHANG_TLX_TARGETS_UP                          | -0,126 | 6E-04 | 0,00274 | 1 |
| MACROMOLECULE_BIOSYNTHETIC_PROCESS            | -0,126 | 6E-04 | 0,00031 | 1 |
| SENGUPTA_NASOPHARYNGEAL_CARCINOMA_TARGETS     | -0,126 | 6E-04 | 0,00166 | 1 |
| REN_BOUND_BY_E2F                              | -0,126 | 6E-04 | 0,00564 | 1 |
| GSE32423_IL7_VS_IL4_MEMORY_CD8_TCELLS         | -0,126 | 6E-04 | 0,00055 | 1 |
| GGCAGTG,MIR-324-3P                            | -0,125 | 6E-04 | 0,0003  | 1 |
| PID_CASPASE_PATHWAY                           | -0,125 | 6E-04 | 0,00059 | 1 |
| GSE15733_BM_VS_SPLEEN_MEMORY_CD4_TCELLS       | -0,125 | 6E-04 | 0,00071 | 1 |
| GSE29618_PRE_VS_DAY7_POST_TIV_FLU_VACCINATION | -0,125 | 6E-04 | 0,0015  | 1 |
| WEST_ADRENOCORTICAL_TUMOR_MARKERS_TARGETS     | -0,125 | 6E-04 | 0,00424 | 1 |
| INTRINSIC_TO_GOLGI_MEMBRANE                   | 0,125  | 6E-04 | 0,00925 | 1 |
| SUZUKI_AMPLIFIED_IN_ORAL_CANCER               | -0,125 | 6E-04 | 0,00104 | 1 |
| CENTROSOME                                    | -0,125 | 6E-04 | 0,00214 | 1 |
| MODULE_204                                    | -0,125 | 6E-04 | 0,00226 | 1 |
| KAMMINGA_EZH2_TARGETS                         | -0,125 | 6E-04 | 0,0027  | 1 |
| DEVELOPMENTAL_GROWTH                          | -0,125 | 6E-04 | 0,0002  | 1 |
| LEIN_LOCALIZED_TO_PROXIMAL_DENDRITES          | -0,125 | 6E-04 | 0,00021 | 1 |
| DORN_ADENOVIRUS_INFECTED_48HR_UP              | -0,125 | 6E-04 | 0,00034 | 1 |
| LOPEZ_MESOTELIOMA_SURVIVAL_TIME_UP            | -0,125 | 6E-04 | 0,00495 | 1 |

|                                        |        |       |         |   |
|----------------------------------------|--------|-------|---------|---|
| MODULE_544                             | -0,125 | 6E-04 | 0,00013 | 1 |
| GSE17721_0.5H_VS_4H_GARDIQUIMOD_BMD    | -0,125 | 6E-04 | 0,0015  | 1 |
| NAKAMURA_METASTASIS                    | -0,125 | 6E-04 | 0,00545 | 1 |
| POSITIVE_REGULATION_OF_RESPONSE_TO_S   | -0,125 | 6E-04 | 0,00105 | 1 |
| ION_BINDING                            | -0,125 | 6E-04 | 0,0005  | 1 |
| MCAATNNNNNGCG_UNKNOWN                  | -0,125 | 6E-04 | 0,02703 | 1 |
| FUJIWARA_PARK2_HEPATOCYTE_PROLIFERAT   | -0,125 | 6E-04 | 0,00249 | 1 |
| AACGGTT,MIR-451                        | -0,125 | 6E-04 | 0,00289 | 1 |
| WONG_IFNA2_RESISTANCE_DN               | -0,125 | 6E-04 | 0,00015 | 1 |
| GARGALOVIC_RESPONSE_TO_OXIDIZED_PHOS   | -0,125 | 6E-04 | 0,00466 | 1 |
| GSE26669_CTRL_VS_COSTIM_BLOCK_MLR_C    | -0,125 | 6E-04 | 0,01788 | 1 |
| KEGG_GLYCOSPHINGOLIPID_BIOSYNTHESIS_LA | -0,125 | 6E-04 | 0,03222 | 1 |
| chr11p14                               | -0,125 | 6E-04 | 0,00076 | 1 |
| PHOSPHOLIPASE_C_ACTIVATION             | -0,125 | 6E-04 | 0,00275 | 1 |
| VANHARANTA_UTERINE_FIBROID_WITH_7Q_I   | -0,125 | 6E-04 | 0,00254 | 1 |
| KANG_DOXORUBICIN_RESISTANCE_UP         | -0,125 | 6E-04 | 0,00132 | 1 |
| WINTER_HYPOXIA_UP                      | -0,125 | 6E-04 | 0,08723 | 1 |
| NAKAMURA_ADIPOGENESIS_EARLY_UP         | -0,125 | 6E-04 | 0,00023 | 1 |
| ALONSO_METASTASIS_NEURAL_UP            | -0,125 | 6E-04 | 0,00601 | 1 |
| GSE16522_MEMORY_VS_NAIVE_CD8_TCELL_    | -0,125 | 6E-04 | 0,00114 | 1 |
| GSE17721_PAM3CSK4_VS_CPG_8H_BMDM_U     | -0,125 | 7E-04 | 0,01144 | 1 |
| MORF_CDC10                             | -0,125 | 7E-04 | 0,03543 | 1 |
| MORF_AATF                              | -0,125 | 7E-04 | 0,04431 | 1 |
| V\$AP1_Q4_01                           | -0,125 | 7E-04 | 0,00025 | 1 |
| BURTON_ADIPOGENESIS_7                  | -0,124 | 7E-04 | 0,00079 | 1 |
| SINGLE_STRANDED_DNA_BINDING            | -0,124 | 7E-04 | 0,00308 | 1 |
| GSE39820_CTRL_VS_TGFBETA3_IL6_CD4_TI   | -0,124 | 7E-04 | 0,00392 | 1 |
| PID_P53DOWNSTREAMPATHWAY               | -0,124 | 7E-04 | 0,00039 | 1 |
| GSE15750_DAY6_VS_DAY10_EFF_CD8_TCEI    | -0,124 | 7E-04 | 0,00262 | 1 |
| REACTOME_METABOLISM_OF_MRNA            | -0,124 | 7E-04 | 0,00208 | 1 |
| PID_MET_PATHWAY                        | -0,124 | 7E-04 | 0,00471 | 1 |
| KAECH_DAY8_EFF_VS_MEMORY_CD8_TCELL_    | -0,124 | 7E-04 | 0,01075 | 1 |
| TAKAYAMA_BOUND_BY_AR                   | -0,124 | 7E-04 | 0,00017 | 1 |
| EXTRACELLULAR_MATRIX_STRUCTURAL_CON:   | -0,124 | 7E-04 | 0,00021 | 1 |
| MODULE_501                             | -0,124 | 7E-04 | 0,00057 | 1 |
| AZARE_NEOPLASTIC_TRANSFORMATION_BY_!   | -0,124 | 7E-04 | 0,00714 | 1 |
| MODULE_189                             | -0,124 | 7E-04 | 0,03547 | 1 |
| GSE29618_MONOCYTE_VS_MDC_DAY7_FLU_     | -0,124 | 7E-04 | 0,00055 | 1 |
| KAUFFMANN_DNA_REPLICATION_GENES        | -0,124 | 7E-04 | 0,00233 | 1 |
| GSE22886_NAIVE_CD4_TCELL_VS_12H_ACT    | -0,124 | 7E-04 | 0,05685 | 1 |
| DELYS_THYROID_CANCER_UP                | -0,124 | 7E-04 | 0,00361 | 1 |
| LIM_MAMMARY_LUMINAL_PROGENITOR_UP      | -0,124 | 7E-04 | 0,01506 | 1 |

|                                        |        |       |         |   |
|----------------------------------------|--------|-------|---------|---|
| GSE17974_CTRL_VS_ACT_IL4_AND_ANTI_IL   | -0,124 | 7E-04 | 0,00042 | 1 |
| DEVELOPMENT_OF_PRIMARY_SEXUAL_CHARA    | -0,124 | 7E-04 | 0,00071 | 1 |
| GSE12366_PLASMA_CELL_VS_NAIVE_BCELL    | -0,124 | 7E-04 | 0,00013 | 1 |
| WINZEN_DEGRADED_VIA_KHSRP              | -0,124 | 7E-04 | 0,00044 | 1 |
| YAGI_AML_SURVIVAL                      | -0,124 | 7E-04 | 0,00062 | 1 |
| WANG_ESOPHAGUS_CANCER_PROGRESSION_I    | -0,124 | 7E-04 | 0,01915 | 1 |
| PROTEIN_TRANSPORTER_ACTIVITY           | 0,124  | 7E-04 | 0,06243 | 1 |
| STEARMAN_LUNG_CANCER_EARLY_VS_LATE     | -0,124 | 7E-04 | 0,00114 | 1 |
| GSE14308_NAIVE_CD4_TCELL_VS_INDUCED    | -0,124 | 7E-04 | 0,00125 | 1 |
| BENPORATH_ES_CORE_NINE                 | -0,124 | 7E-04 | 0,02333 | 1 |
| GSE17721_CTRL_VS_LPS_1H_BMDM_DN        | -0,124 | 7E-04 | 0,00034 | 1 |
| GGGNNTTCC_V\$NFKB_Q6_01                | -0,124 | 7E-04 | 0,00036 | 1 |
| GSE7852_LN_VS_THYMUS_TCONV_UP          | -0,124 | 7E-04 | 0,00026 | 1 |
| CYTOPLASMIC_VESICLE_MEMBRANE           | -0,124 | 7E-04 | 0,01126 | 1 |
| CYTOPLASMIC_VESICLE_PART               | -0,124 | 7E-04 | 0,01126 | 1 |
| YAO_TEMPORAL_RESPONSE_TO_PROGESTERC    | -0,124 | 7E-04 | 0,00156 | 1 |
| chr3q28                                | -0,124 | 7E-04 | 0,02212 | 1 |
| PECE_MAMMARY_STEM_CELL_DN              | -0,124 | 7E-04 | 0,0048  | 1 |
| GSE22886_CD4_TCELL_VS_BCELL_NAIVE_D    | -0,124 | 7E-04 | 0,00023 | 1 |
| GEORGES_TARGETS_OF_MIR192_AND_MIR21    | -0,124 | 7E-04 | 0,00493 | 1 |
| IRITANI_MAD1_TARGETS_DN                | -0,124 | 7E-04 | 0,00927 | 1 |
| VANTVEER_BREAST_CANCER_METASTASIS_D    | -0,124 | 7E-04 | 0,04512 | 1 |
| GSE360_DC_VS_MAC_DN                    | -0,124 | 7E-04 | 0,0007  | 1 |
| CRX_DN.V1_DN                           | -0,124 | 7E-04 | 0,00015 | 1 |
| ALONSO_METASTASIS_EMT_UP               | -0,124 | 7E-04 | 0,00049 | 1 |
| GNF2_BUB1B                             | -0,124 | 7E-04 | 0,00274 | 1 |
| GSE17721_LPS_VS_CPG_2H_BMDM_UP         | -0,124 | 7E-04 | 0,00068 | 1 |
| MODULE_104                             | -0,124 | 7E-04 | 0,00043 | 1 |
| MODULE_389                             | -0,123 | 7E-04 | 0,00047 | 1 |
| GCM_RAF1                               | -0,123 | 7E-04 | 0,00108 | 1 |
| GSE17721_PAM3CSK4_VS_CPG_1H_BMDM_I     | -0,123 | 7E-04 | 0,00018 | 1 |
| MODULE_229                             | -0,123 | 7E-04 | 0,00211 | 1 |
| LINDVALL_IMMORTALIZED_BY_TERT_DN       | -0,123 | 7E-04 | 0,00024 | 1 |
| PID_P38ALPHAPATHWAY                    | -0,123 | 7E-04 | 0,00053 | 1 |
| V\$BACH2_01                            | -0,123 | 7E-04 | 0,0009  | 1 |
| MODULE_543                             | -0,123 | 7E-04 | 0,00256 | 1 |
| MODULE_17                              | -0,123 | 7E-04 | 0,02218 | 1 |
| CHEN_HOXA5_TARGETS_9HR_DN              | -0,123 | 7E-04 | 0,00499 | 1 |
| GSE31082_DP_VS_CD4_SP_THYMOCYTE_UP     | -0,123 | 7E-04 | 0,00334 | 1 |
| RB_DN.V1_UP                            | -0,123 | 7E-04 | 0,00118 | 1 |
| KRAS.300_UP.V1_DN                      | -0,123 | 7E-04 | 0,00115 | 1 |
| POSITIVE_REGULATION_OF_BIOLOGICAL_PROI | -0,123 | 7E-04 | 0,00015 | 1 |

|                                         |        |       |         |   |
|-----------------------------------------|--------|-------|---------|---|
| BIOCARTA_BCELLSURVIVAL_PATHWAY          | -0,123 | 7E-04 | 0,00111 | 1 |
| DNA_DAMAGE_CHECKPOINT                   | -0,123 | 7E-04 | 0,00463 | 1 |
| HELLER_HDAC_TARGETS_SILENCED_BY_METH    | -0,123 | 7E-04 | 0,00213 | 1 |
| SCHAEFFER_PROSTATE_DEVELOPMENT_AND_     | -0,123 | 7E-04 | 0,00055 | 1 |
| NUCLEOSOME_ASSEMBLY                     | -0,123 | 7E-04 | 0,00034 | 1 |
| V\$MEIS1AHOXA9_01                       | -0,123 | 8E-04 | 0,00015 | 1 |
| SPINDLE                                 | -0,123 | 8E-04 | 0,00911 | 1 |
| ORGAN_MORPHOGENESIS                     | -0,123 | 8E-04 | 0,00044 | 1 |
| PID_ATM_PATHWAY                         | -0,123 | 8E-04 | 0,00212 | 1 |
| NUCLEOCYTOPLASMIC_TRANSPORT             | -0,123 | 8E-04 | 0,02138 | 1 |
| MORF_DEAF1                              | -0,123 | 8E-04 | 0,03051 | 1 |
| GSE7764_IL15_TREATED_VS_CTRL_NK_CELI    | -0,123 | 8E-04 | 0,00506 | 1 |
| MODULE_545                              | -0,123 | 8E-04 | 0,00762 | 1 |
| chr16q13                                | -0,123 | 8E-04 | 0,00944 | 1 |
| CHEOK_RESPONSE_TO_MERCAPTOPYRINE_DN     | -0,123 | 8E-04 | 0,00179 | 1 |
| MCBRYAN_TERMINAL_END_BUD_DN             | -0,123 | 8E-04 | 0,00176 | 1 |
| BAFNA_MUC4_TARGETS_DN                   | -0,123 | 8E-04 | 0,02641 | 1 |
| KYNG_RESPONSE_TO_H2O2_VIA_ERCC6_UP      | -0,123 | 8E-04 | 0,00142 | 1 |
| BIOCARTA_INTEGRIN_PATHWAY               | -0,123 | 8E-04 | 0,00654 | 1 |
| BROWNE_HCMV_INFECTION_20HR_UP           | -0,123 | 8E-04 | 0,00027 | 1 |
| SATO_SILENCED_BY_METHYLATION_IN_PANC    | -0,123 | 8E-04 | 0,0003  | 1 |
| MODULE_267                              | -0,123 | 8E-04 | 0,00016 | 1 |
| SARTIPY_NORMAL_AT_INSULIN_RESISTANCE_   | -0,123 | 8E-04 | 0,0057  | 1 |
| GSE18791_CTRL_VS_NEWCASTLE_VIRUS_DC     | -0,123 | 8E-04 | 0,00562 | 1 |
| GSE360_L_DONOVANI_VS_L_MAJOR_MAC_U      | -0,123 | 8E-04 | 0,00077 | 1 |
| ABE_VEGFA_TARGETS_2HR                   | -0,123 | 8E-04 | 0,00462 | 1 |
| FRIDMAN_SENESCENCE_UP                   | -0,123 | 8E-04 | 0,0007  | 1 |
| PARK_OSTEOBLAST_DIFFERENTIATION_BY_PF   | -0,123 | 8E-04 | 0,00563 | 1 |
| chr9q21                                 | -0,123 | 8E-04 | 0,00414 | 1 |
| MORF_IFNA1                              | -0,123 | 8E-04 | 0,00026 | 1 |
| KEGG_EPITHELIAL_CELL_SIGNALING_IN_HELIC | -0,123 | 8E-04 | 0,01682 | 1 |
| MYELOID_CELL_DIFFERENTIATION            | -0,123 | 8E-04 | 0,00057 | 1 |
| SULFUR_METABOLIC_PROCESS                | -0,123 | 8E-04 | 0,00251 | 1 |
| REACTOME_INTERACTIONS_OF_VPR_WITH_HI    | -0,123 | 8E-04 | 0,01623 | 1 |
| GOTZMANN_EPITHELIAL_TO_MESENCHYMAL_     | -0,123 | 8E-04 | 0,01957 | 1 |
| chr6p12                                 | -0,123 | 8E-04 | 0,00369 | 1 |
| TRANSCRIPTION_ELONGATION_REGULATOR_A    | -0,123 | 8E-04 | 0,00466 | 1 |
| GRAESSMANN_APOPTOSIS_BY_SERUM_DEPRIV    | -0,123 | 8E-04 | 0,00014 | 1 |
| LA_MEN1_TARGETS                         | -0,123 | 8E-04 | 0,00019 | 1 |
| OXFORD_RALA_OR_RALB_TARGETS_UP          | -0,123 | 8E-04 | 0,0053  | 1 |
| ROSTY_CERVICAL_CANCER_PROLIFERATION_C   | -0,123 | 8E-04 | 0,00283 | 1 |
| ZWANG_CLASS_1_TRANSIENTLY_INDUCED_B     | -0,123 | 8E-04 | 0,00023 | 1 |

|                                       |        |       |         |   |
|---------------------------------------|--------|-------|---------|---|
| PHOSPHATASE_REGULATOR_ACTIVITY        | -0,123 | 8E-04 | 0,0008  | 1 |
| chr18q21                              | -0,123 | 8E-04 | 0,00196 | 1 |
| SOLUBLE_FRACTION                      | -0,123 | 8E-04 | 0,00049 | 1 |
| SPLICEOSOME                           | -0,123 | 8E-04 | 0,00774 | 1 |
| PHONG_TNF_RESPONSE_VIA_P38_COMPLETE   | -0,123 | 8E-04 | 0,0005  | 1 |
| MODULE_318                            | -0,123 | 8E-04 | 0,00378 | 1 |
| AMUNDSON_GAMMA_RADIATION_RESPONSE     | -0,122 | 8E-04 | 0,00263 | 1 |
| CAFFAREL_RESPONSE_TO_THC_24HR_3_DN    | -0,122 | 8E-04 | 0,00983 | 1 |
| GCM_SMARCD1                           | -0,122 | 8E-04 | 0,00013 | 1 |
| MODULE_481                            | -0,122 | 8E-04 | 0,00014 | 1 |
| MODULE_33                             | -0,122 | 8E-04 | 0,00027 | 1 |
| ODONNELL_TARGETS_OF_MYC_AND_TFRC_D    | -0,122 | 8E-04 | 0,00559 | 1 |
| REGULATION_OF_MOLECULAR_FUNCTION      | -0,122 | 8E-04 | 0,00018 | 1 |
| GSE17721_CPG_VS_GARDIQUIMOD_8H_BMDM   | -0,122 | 8E-04 | 0,00057 | 1 |
| PID_GLYPICAN_1PATHWAY                 | -0,122 | 8E-04 | 0,00024 | 1 |
| AGCATTAMIR-155                        | -0,122 | 8E-04 | 0,00084 | 1 |
| REACTOME_PROTEIN_FOLDING              | -0,122 | 8E-04 | 0,02195 | 1 |
| TRACEY_RESISTANCE_TO_IFNA2_UP         | -0,122 | 8E-04 | 0,00515 | 1 |
| YANAGIHARA_ESX1_TARGETS               | -0,122 | 8E-04 | 0,00038 | 1 |
| HINATA_NFKB_TARGETS_FIBROBLAST_UP     | -0,122 | 8E-04 | 0,01264 | 1 |
| GSE36476_CTRL_VS_TSST_ACT_40H_MEMO    | -0,122 | 8E-04 | 0,00726 | 1 |
| GCM_RAD21                             | -0,122 | 8E-04 | 0,03599 | 1 |
| MANTOVANI_VIRAL_GPCR_SIGNALING_DN     | -0,122 | 8E-04 | 0,00101 | 1 |
| REACTOME_TIE2_SIGNALING               | -0,122 | 8E-04 | 0,0044  | 1 |
| NUCLEAR_TRANSPORT                     | -0,122 | 8E-04 | 0,02223 | 1 |
| WU_HBX_TARGETS_2_UP                   | -0,122 | 8E-04 | 0,00841 | 1 |
| MARTORIATI_MDM4_TARGETS_FETAL_LIVER   | -0,122 | 8E-04 | 0,00221 | 1 |
| SHETH_LIVER_CANCER_VS_TXNIP_LOSS_PAM  | -0,122 | 8E-04 | 0,00062 | 1 |
| MULLIGHAN_NPM1_SIGNATURE_3_DN         | -0,122 | 9E-04 | 0,00014 | 1 |
| GSE12845_NAIVE_VS_PRE_GC_TONSIL_BCEL  | -0,122 | 9E-04 | 0,03888 | 1 |
| ZHAN_V1_LATE_DIFFERENTIATION_GENES_DI | -0,122 | 9E-04 | 0,00288 | 1 |
| KRAS.50_UP.V1_UP                      | -0,122 | 9E-04 | 0,00061 | 1 |
| MORF_EIF4E                            | -0,122 | 9E-04 | 0,07785 | 1 |
| GSE13306_LAMINA_PROPRIA_VS_SPLEEN_TF  | -0,122 | 9E-04 | 0,00097 | 1 |
| ONDER_CDH1_TARGETS_3_DN               | -0,122 | 9E-04 | 0,02736 | 1 |
| BIOCARTA_CCR3_PATHWAY                 | -0,122 | 9E-04 | 0,018   | 1 |
| HOFMANN_CELL_LYMPHOMA_DN              | -0,122 | 9E-04 | 0,0005  | 1 |
| NUCLEAR_MEMBRANE_PART                 | -0,122 | 9E-04 | 0,05224 | 1 |
| ZHAN_EARLY_DIFFERENTIATION_GENES_DN   | -0,122 | 9E-04 | 0,00114 | 1 |
| ZHAN_MULTIPLE_MYELOMA_CD1_VS_CD2_DI   | -0,122 | 9E-04 | 0,0028  | 1 |
| HWANG_PROSTATE_CANCER_MARKERS         | 0,122  | 9E-04 | 0,01731 | 1 |
| BENPORATH_PROLIFERATION               | -0,122 | 9E-04 | 0,01585 | 1 |

|                                       |        |       |         |   |
|---------------------------------------|--------|-------|---------|---|
| SESTO_RESPONSE_TO_UV_C4               | -0,122 | 9E-04 | 0,11666 | 1 |
| GSE3982_DC_VS_NKCELL_DN               | -0,122 | 9E-04 | 0,00018 | 1 |
| GNF2_XRCC5                            | -0,122 | 9E-04 | 0,10359 | 1 |
| GSE27786_LSK_VS_LIN_NEG_CELL_DN       | -0,122 | 9E-04 | 0,00032 | 1 |
| REACTOME_GLYCOSAMINOGLYCAN_METABOL    | -0,121 | 9E-04 | 0,00088 | 1 |
| GSE30962_ACUTE_VS_CHRONIC_LCMV_SECC   | -0,121 | 9E-04 | 0,01658 | 1 |
| YANG_BREAST_CANCER_ESR1_LASER_UP      | 0,121  | 9E-04 | 0,10783 | 1 |
| EXTRACELLULAR_REGION_PART             | -0,121 | 9E-04 | 0,00017 | 1 |
| MODULE_439                            | -0,121 | 9E-04 | 0,00672 | 1 |
| REACTOME_LATE_PHASE_OF_HIV_LIFE_CYCL  | -0,121 | 9E-04 | 0,01888 | 1 |
| WALLACE_PROSTATE_CANCER_DN            | -0,121 | 9E-04 | 0,00052 | 1 |
| MORF_RFC4                             | -0,121 | 9E-04 | 0,03    | 1 |
| MARSON_FOXP3_TARGETS_DN               | -0,121 | 9E-04 | 0,00037 | 1 |
| MYLLYKANGAS_AMPLIFICATION_HOT_SPOT_ξ  | -0,121 | 9E-04 | 0,00124 | 1 |
| HOMEOSTASIS_OF_NUMBER_OF_CELLS        | -0,121 | 9E-04 | 0,00236 | 1 |
| GSE29618_BCELL_VS_MONOCYTE_DAY7_FLI   | -0,121 | 9E-04 | 0,00048 | 1 |
| CYCLIN_D1_KE_V1_UP                    | -0,121 | 9E-04 | 0,00025 | 1 |
| HOFFMANN_SMALL_PRE_BII_TO_IMMATURE_E  | -0,121 | 9E-04 | 0,0002  | 1 |
| CHOW_RASSF1_TARGETS_UP                | -0,121 | 9E-04 | 0,0038  | 1 |
| HAN_JNK_SINGALING_DN                  | -0,121 | 9E-04 | 0,0006  | 1 |
| ULE_SPLICING_VIA_NOVA2                | -0,121 | 9E-04 | 0,001   | 1 |
| GENTILE_UV_RESPONSE_CLUSTER_D4        | -0,121 | 9E-04 | 0,01194 | 1 |
| ACATATC,MIR-190                       | -0,121 | 9E-04 | 0,00389 | 1 |
| MORF_MLLT10                           | -0,121 | 9E-04 | 0,00014 | 1 |
| DURCHDEWALD_SKIN_CARCINOGENESIS_DN    | -0,121 | 9E-04 | 0,00302 | 1 |
| REACTOME_KINESINS                     | -0,121 | 9E-04 | 0,00394 | 1 |
| MODULE_159                            | -0,121 | 9E-04 | 0,01674 | 1 |
| REACTOME_POST_TRANSLATIONAL_MODIFICA/ | 0,121  | 9E-04 | 0,00941 | 1 |
| SCHUHMACHER_MYC_TARGETS_UP            | -0,121 | 9E-04 | 0,05261 | 1 |
| GARY_CD5_TARGETS_DN                   | -0,121 | 9E-04 | 0,03033 | 1 |
| LE_NEURONAL_DIFFERENTIATION_UP        | -0,121 | 9E-04 | 0,00053 | 1 |
| PEPTIDYL_TYROSINE_MODIFICATION        | -0,121 | 9E-04 | 0,00162 | 1 |
| AMINE_BIOSYNTHETIC_PROCESS            | -0,121 | 1E-03 | 0,00015 | 1 |
| KEGG_AXON_GUIDANCE                    | -0,121 | 1E-03 | 0,00014 | 1 |
| ZHAN_MULTIPLE_MYELOMA_CD1_VS_CD2_UI   | -0,121 | 1E-03 | 0,00099 | 1 |
| TERAO_AOX4_TARGETS_HG_DN              | -0,121 | 1E-03 | 0,0031  | 1 |
| PID_P38_MK2PATHWAY                    | -0,121 | 1E-03 | 0,01663 | 1 |
| HUANG_DASATINIB_RESISTANCE_UP         | -0,121 | 1E-03 | 0,00614 | 1 |
| GSE22886_TCELL_VS_BCELL_NAIVE_DN      | -0,121 | 1E-03 | 0,0006  | 1 |
| GSE17721_CTRL_VS_PAM3CSK4_6H_BMDM     | -0,121 | 1E-03 | 0,01651 | 1 |
| chr13q22                              | -0,121 | 1E-03 | 0,00028 | 1 |
| POSITIVE_REGULATION_OF_CYTOKINE_PROD  | -0,121 | 1E-03 | 0,0018  | 1 |

|                                       |       |       |         |   |
|---------------------------------------|-------|-------|---------|---|
| KONG_E2F1_TARGETS                     | -0,12 | 1E-03 | 0,06166 | 1 |
| CHIANG_LIVER_CANCER_SUBCLASS_POLYSON  | -0,12 | 1E-03 | 0,01881 | 1 |
| CROSBY_E2F4_TARGETS                   | -0,12 | 1E-03 | 0,00586 | 1 |
| REGULATION_OF_PROGRAMMED_CELL_DEATH   | -0,12 | 1E-03 | 0,00147 | 1 |
| GSE36392_EOSINOPHIL_VS_NEUTROPHIL_IL2 | -0,12 | 1E-03 | 0,00359 | 1 |
| GSE3982_NEUTROPHIL_VS_TH1_UP          | -0,12 | 1E-03 | 0,0013  | 1 |
| ONE_CARBON_COMPOUND_METABOLIC_PROC    | -0,12 | 1E-03 | 0,00644 | 1 |
| KRAS.LUNG.BREAST_UP.V1_DN             | -0,12 | 1E-03 | 0,0002  | 1 |
| MORF_CCNF                             | -0,12 | 1E-03 | 0,00987 | 1 |
| SASAI_TARGETS_OF_CXCR6_AND_PTCH1_UP   | -0,12 | 1E-03 | 0,01846 | 1 |
| GSE22886_NEUTROPHIL_VS_DC_UP          | -0,12 | 1E-03 | 0,00027 | 1 |
| AACTGGA,MIR-145                       | -0,12 | 0,001 | 0,00041 | 1 |
| MORF_RAD23A                           | -0,12 | 0,001 | 0,04495 | 1 |
| GSE27786_CD4_VS_CD8_TCELL_DN          | -0,12 | 0,001 | 0,00076 | 1 |
| REACTOME_METABOLISM_OF_CARBOHYDRATI   | -0,12 | 0,001 | 0,00761 | 1 |
| BILD_CTNNB1_ONCOGENIC_SIGNATURE       | -0,12 | 0,001 | 0,00054 | 1 |
| PASQUALUCCI_LYMPHOMA_BY_GC_STAGE_UI   | -0,12 | 0,001 | 0,00231 | 1 |
| GSE17974_2.5H_VS_72H_IL4_AND_ANTI_IL  | -0,12 | 0,001 | 0,00934 | 1 |
| WANG_ESOPHAGUS_CANCER_VS_NORMAL_D     | -0,12 | 0,001 | 0,00534 | 1 |
| PID_S1P_S1P4_PATHWAY                  | -0,12 | 0,001 | 0,00119 | 1 |
| V\$CDPCR3_01                          | -0,12 | 0,001 | 0,00114 | 1 |
| ZHU_SKIL_TARGETS_DN                   | -0,12 | 0,001 | 0,00498 | 1 |
| SASAKI_TARGETS_OF_TP73_AND_TP63       | -0,12 | 0,001 | 0,00208 | 1 |
| GSE17721_LPS_VS_GARDIQUIMOD_2H_BMDM   | -0,12 | 0,001 | 0,00013 | 1 |
| NIELSEN_LIPOSARCOMA_DN                | -0,12 | 0,001 | 0,07273 | 1 |
| CONDENSED_NUCLEAR_CHROMOSOME          | -0,12 | 0,001 | 0,0052  | 1 |
| LI_WILMS_TUMOR                        | -0,12 | 0,001 | 0,0009  | 1 |
| GSE17721_CPG_VS_GARDIQUIMOD_16H_BMI   | -0,12 | 0,001 | 0,0006  | 1 |
| MODULE_138                            | -0,12 | 0,001 | 0,00025 | 1 |
| V\$NFKAPPAB_01                        | -0,12 | 0,001 | 0,00106 | 1 |
| CAFFAREL_RESPONSE_TO_THC_8HR_5_DN     | -0,12 | 0,001 | 0,01238 | 1 |
| HE_PTEN_TARGETS_DN                    | -0,12 | 0,001 | 0,00109 | 1 |
| CTATGCA,MIR-153                       | -0,12 | 0,001 | 0,00067 | 1 |
| V\$CEBPB_02                           | -0,12 | 0,001 | 0,00048 | 1 |
| KEGG_RNA_POLYMERASE                   | -0,12 | 0,001 | 0,02398 | 1 |
| DIAZ_CHRONIC_MEYLOGENOUS_LEUKEMIA_UP  | -0,12 | 0,001 | 0,05314 | 1 |
| REACTOME_RECRUITMENT_OF_MITOTIC_CENT  | -0,12 | 0,001 | 0,00433 | 1 |
| SHIPP_DLBCL_CURED_VS_FATAL_UP         | -0,12 | 0,001 | 0,00156 | 1 |
| BIOCARTA_ECM_PATHWAY                  | -0,12 | 0,001 | 0,0084  | 1 |
| PENG_LEUCINE_DEPRIVATION_DN           | -0,12 | 0,001 | 0,08415 | 1 |
| CLASPER_LYMPHATIC_VESSELS_DURING_MET  | -0,12 | 0,001 | 0,00045 | 1 |
| PROTEIN_IMPORT_INTO_NUCLEUS           | -0,12 | 0,001 | 0,02575 | 1 |

|                                       |        |       |         |   |
|---------------------------------------|--------|-------|---------|---|
| GSE17974_IL4_AND_ANTI_IL12_VS_UNTREA  | -0,12  | 0,001 | 0,00028 | 1 |
| WESTON_VEGFA_TARGETS_12HR             | -0,12  | 0,001 | 0,00015 | 1 |
| MODULE_377                            | 0,12   | 0,001 | 0,01113 | 1 |
| AGGAGTG,MIR-483                       | -0,12  | 0,001 | 0,00027 | 1 |
| DAVICIONI_TARGETS_OF_PAX_FOXO1_FUSIO  | -0,12  | 0,001 | 0,00017 | 1 |
| GSE15659_NAIVE_VS_PTPRC_NEG_CD4_TCE   | -0,119 | 0,001 | 0,00299 | 1 |
| SHEN_SMARCA2_TARGETS_DN               | -0,119 | 0,001 | 0,00512 | 1 |
| GSE12845_IGD_POS_VS_NEG_BLOOD_BCELL   | -0,119 | 0,001 | 0,09324 | 1 |
| GNF2_PA2G4                            | -0,119 | 0,001 | 0,04786 | 1 |
| ARYLSULFATASE_ACTIVITY                | -0,119 | 0,001 | 0,00133 | 1 |
| TANG_SENESCENCE_TP53_TARGETS_UP       | -0,119 | 0,001 | 0,0004  | 1 |
| GGCACAT,MIR-455                       | -0,119 | 0,001 | 0,00085 | 1 |
| GSE15930_NAIVE_VS_72H_IN_VITRO_STIM_  | -0,119 | 0,001 | 0,01115 | 1 |
| ROME_INSULIN_TARGETS_IN_MUSCLE_DN     | -0,119 | 0,001 | 0,00013 | 1 |
| REACTOME_PEPTIDE_LIGAND_BINDING_RECEP | -0,119 | 0,001 | 0,00047 | 1 |
| SIALYLTRANSFERASE_ACTIVITY            | -0,119 | 0,001 | 0,00131 | 1 |
| BOUDOUKHA_BOUND_BY_IGF2BP2            | -0,119 | 0,001 | 0,01    | 1 |
| REACTOME_HEPARAN_SULFATE_HEPARIN_HS   | -0,119 | 0,001 | 0,00105 | 1 |
| SEIDEN_ONCOGENESIS_BY_MET             | -0,119 | 0,001 | 0,02947 | 1 |
| BIOCARTA_MYOSIN_PATHWAY               | -0,119 | 0,001 | 0,00023 | 1 |
| GSE27786_LSK_VS_NEUTROPHIL_DN         | -0,119 | 0,001 | 0,00016 | 1 |
| MIKKELSEN_ES_HCP_WITH_H3_UNMETHYLAT   | -0,119 | 0,001 | 0,00013 | 1 |
| SOTIRIOU_BREAST_CANCER_GRADE_1_VS_3_  | -0,119 | 0,001 | 0,00628 | 1 |
| ACEVEDO_FGFR1_TARGETS_IN_PROSTATE_C_  | -0,119 | 0,001 | 0,00677 | 1 |
| REACTOME_DEGRADATION_OF_THE_EXTRACE   | -0,119 | 0,001 | 0,00068 | 1 |
| REACTOME_SIGNALING_BY_CONSTITUTIVELY_ | -0,119 | 0,001 | 0,01593 | 1 |
| chr10p12                              | -0,119 | 0,001 | 0,00295 | 1 |
| KUMAMOTO_RESPONSE_TO_NUTLIN_3A_DN     | -0,119 | 0,001 | 0,0051  | 1 |
| SISTER_CHROMATID_SEGREGATION          | -0,119 | 0,001 | 0,00919 | 1 |
| EMBRYONIC_DEVELOPMENT                 | -0,119 | 0,001 | 0,00027 | 1 |
| TIEN_INTESTINE_PROBIOTICS_24HR_UP     | -0,119 | 0,001 | 0,04434 | 1 |
| P53_DN.V1_DN                          | -0,119 | 0,001 | 0,00017 | 1 |
| ROSS_AML_OF_FAB_M7_TYPE               | -0,119 | 0,001 | 0,0007  | 1 |
| MRNA_SPLICE_SITE_SELECTION            | -0,119 | 0,001 | 0,00171 | 1 |
| MELLMAN_TUT1_TARGETS_DN               | -0,119 | 0,001 | 0,01092 | 1 |
| REGULATION_OF_APOPTOSIS               | -0,119 | 0,001 | 0,00184 | 1 |
| REACTOME_TRANSPORT_OF_VITAMINS_NUCL   | -0,119 | 0,001 | 0,00854 | 1 |
| GSE15930_STIM_VS_STIM_AND_IL-12_48H_  | -0,119 | 0,001 | 0,00142 | 1 |
| IM_SREBF1A_TARGETS                    | 0,119  | 0,001 | 0,13268 | 1 |
| TIEN_INTESTINE_PROBIOTICS_2HR_UP      | -0,119 | 0,001 | 0,00118 | 1 |
| GSE3982_EOSINOPHIL_VS_BASOPHIL_UP     | -0,119 | 0,001 | 0,00083 | 1 |
| NUYTEN_NIPP1_TARGETS_DN               | -0,118 | 0,001 | 0,00628 | 1 |



|                                      |        |       |         |   |
|--------------------------------------|--------|-------|---------|---|
| SU_TESTIS                            | -0,118 | 0,001 | 0,01788 | 1 |
| PETROVA_ENDOTHELIUM_LYMPHATIC_VS_BLI | -0,118 | 0,001 | 0,0029  | 1 |
| PID_MAPKTRKPATHWAY                   | -0,118 | 0,001 | 0,00052 | 1 |
| chr12p11                             | -0,118 | 0,001 | 0,0026  | 1 |
| GNF2_EIF3S6                          | -0,118 | 0,001 | 0,00105 | 1 |
| MORF_CDH4                            | -0,118 | 0,001 | 0,00023 | 1 |
| SA_G2_AND_M_PHASES                   | -0,118 | 0,001 | 0,01229 | 1 |
| VERRECCHIA_RESPONSE_TO_TGFB1_C4      | -0,118 | 0,001 | 0,00956 | 1 |
| POS_RESPONSE_TO_HISTAMINE_DN         | -0,118 | 0,001 | 0,02021 | 1 |
| GOTTWEIN_TARGETS_OF_KSHV_MIR_K12_11  | -0,118 | 0,001 | 0,00064 | 1 |
| ANION_TRANSMEMBRANE_TRANSPORTER_AC   | -0,118 | 0,001 | 0,00016 | 1 |
| CHEN_HOXA5_TARGETS_9HR_UP            | -0,118 | 0,001 | 0,00053 | 1 |
| GNF2_BUB3                            | -0,118 | 0,001 | 0,04321 | 1 |
| GSE13306_TREG_VS_TCONV_LAMINA_PROPF  | -0,118 | 0,001 | 0,00015 | 1 |
| GSE18791_UNSTIM_VS_NEWCATSLE_VIRUS_  | -0,118 | 0,001 | 0,00411 | 1 |
| INTEGRIN_COMPLEX                     | -0,118 | 0,001 | 0,00159 | 1 |
| RHODES_CANCER_META_SIGNATURE         | -0,118 | 0,001 | 0,03043 | 1 |
| KEGG_PROSTATE_CANCER                 | -0,118 | 0,001 | 0,00013 | 1 |
| TRAYNOR_RETT_SYNDROM_UP              | -0,118 | 0,001 | 0,00079 | 1 |
| GSE17721_POLYIC_VS_PAM3CSK4_16H_BMI  | -0,118 | 0,001 | 0,00178 | 1 |
| BASSO_B_LYMPHOCYTE_NETWORK           | -0,118 | 0,001 | 0,0237  | 1 |
| GOLDRATH_ANTIGEN_RESPONSE            | -0,118 | 0,001 | 0,00949 | 1 |
| MARCINIAK_ER_STRESS_RESPONSE_VIA_CHO | -0,118 | 0,001 | 0,02615 | 1 |
| KEGG_PEROXISOME                      | 0,118  | 0,001 | 0,01459 | 1 |
| GERHOLD_ADIPOGENESIS_DN              | -0,118 | 0,001 | 0,00183 | 1 |
| MORF_IL16                            | -0,118 | 0,001 | 0,00051 | 1 |
| GSE12845_IGD_POS_BLOOD_VS_NAIVE_TON  | -0,118 | 0,001 | 0,005   | 1 |
| AZARE_NEOPLASTIC_TRANSFORMATION_BY_: | -0,118 | 0,001 | 0,00223 | 1 |
| RB_P107_DN.V1_DN                     | -0,118 | 0,001 | 0,1558  | 1 |
| REACTOME_CHONDROITIN_SULFATE_DERMAT  | -0,118 | 0,001 | 0,0008  | 1 |
| YIH_RESPONSE_TO_ARSENITE_C4          | -0,118 | 0,001 | 0,02722 | 1 |
| GSE19825_CD24LOW_VS_IL2RA_HIGH_DAY3  | -0,118 | 0,001 | 0,04833 | 1 |
| KEGG_FC_GAMMA_R_MEDIATED_PHAGOCYTO   | -0,118 | 0,001 | 0,00364 | 1 |
| MORF_BMPR2                           | -0,118 | 0,001 | 0,00209 | 1 |
| GSE14769_20MIN_VS_360MIN_LPS_BMDM_I  | -0,118 | 0,001 | 0,0009  | 1 |
| chr15q13                             | -0,118 | 0,001 | 0,00127 | 1 |
| SLEBOS_HEAD_AND_NECK_CANCER_WITH_H   | -0,118 | 0,001 | 0,02975 | 1 |
| PID_ERBB2ERBB3PATHWAY                | -0,118 | 0,001 | 0,00034 | 1 |
| XU_GH1_EXOGENOUS_TARGETS_DN          | -0,118 | 0,001 | 0,0002  | 1 |
| PTEN_DN.V2_UP                        | -0,118 | 0,001 | 0,00039 | 1 |
| WOO_LIVER_CANCER_RECURRENCE_UP       | -0,118 | 0,001 | 0,00055 | 1 |
| WANG_TARGETS_OF_MLL_CBP_FUSION_DN    | -0,118 | 0,001 | 0,15605 | 1 |

|                                          |        |       |         |   |
|------------------------------------------|--------|-------|---------|---|
| REACTOME_DNA_REPLICATION                 | -0,118 | 0,001 | 0,01386 | 1 |
| REACTOME_REGULATION_OF_MITOTIC_CELL      | -0,118 | 0,001 | 0,03462 | 1 |
| MARSHALL_VIRAL_INFECTION_RESPONSE_DN     | -0,118 | 0,001 | 0,00055 | 1 |
| GSE17974_0.5H_VS_72H_UNTREATED_IN_V      | -0,118 | 0,001 | 0,01012 | 1 |
| KEGG_RNA_DEGRADATION                     | -0,118 | 0,001 | 0,02884 | 1 |
| MCBRYAN_PUBERTAL_TGFB1_TARGETS_UP        | -0,118 | 0,001 | 0,00013 | 1 |
| GSE1460_CD4_THYMOCYTE_VS_NAIVE_CD4       | -0,118 | 0,001 | 0,02455 | 1 |
| TOMIDA_LUNG_CANCER_POOR_SURVIVAL         | -0,118 | 0,001 | 0,03316 | 1 |
| GSE26928_NAIVE_VS_CENT_MEMORY_CD4        | -0,117 | 0,001 | 0,0021  | 1 |
| LEE_LIVER_CANCER_DENA_UP                 | -0,117 | 0,001 | 0,0185  | 1 |
| PID_PDGFBRPATHWAY                        | -0,117 | 0,001 | 0,00194 | 1 |
| MOHANKUMAR_TLX1_TARGETS_UP               | -0,117 | 0,001 | 0,00019 | 1 |
| MORF_CAMK4                               | -0,117 | 0,001 | 0,00018 | 1 |
| PROGRAMMED_CELL_DEATH                    | -0,117 | 0,001 | 0,001   | 1 |
| VANTVEER_BREAST_CANCER_POOR_PROGNO       | -0,117 | 0,001 | 0,00105 | 1 |
| MODULE_219                               | -0,117 | 0,001 | 0,0257  | 1 |
| REGULATION_OF_INTRACELLULAR_TRANSPOR     | -0,117 | 0,001 | 0,01362 | 1 |
| GSE17721_POLYIC_VS_PAM3CSK4_1H_BMDI      | -0,117 | 0,001 | 0,00129 | 1 |
| GSE17580_TREG_VS_TEFF_S_MANSONI_INF      | -0,117 | 0,001 | 0,00013 | 1 |
| GGGCATT,MIR-365                          | -0,117 | 0,001 | 0,00098 | 1 |
| WOOD_EBV_EBNA1_TARGETS_UP                | -0,117 | 0,001 | 0,0069  | 1 |
| PROTEIN_KINASE_INHIBITOR_ACTIVITY        | -0,117 | 0,001 | 0,00014 | 1 |
| REACTOME_E2F_MEDIATED_REGULATION_OF      | -0,117 | 0,001 | 0,01144 | 1 |
| GSE24102_GRANULOCYSTIC_MDSC_VS_NEUT      | -0,117 | 0,001 | 0,00887 | 1 |
| GSE15930_STIM_VS_STIM_AND_IFNAB_48H      | -0,117 | 0,001 | 0,00214 | 1 |
| WANG_BARRETTES_ESOPHAGUS_DN              | -0,117 | 0,001 | 0,05689 | 1 |
| BIOCARTA_RARRXR_PATHWAY                  | 0,117  | 0,001 | 0,00994 | 1 |
| ST_PAC1_RECEPTOR_PATHWAY                 | 0,117  | 0,001 | 0,05073 | 1 |
| chr4q31                                  | -0,117 | 0,001 | 0,00061 | 1 |
| TGCTGCT,MIR-15A,MIR-16,MIR-15B,MIR-195,M | -0,117 | 0,001 | 0,00016 | 1 |
| MODULE_312                               | -0,117 | 0,001 | 0,02167 | 1 |
| GSE36476_CTRL_VS_TSST_ACT_40H_MEMO       | -0,117 | 0,001 | 0,02452 | 1 |
| ZHAN_MULTIPLE_MYELOMA_MF_UP              | -0,117 | 0,001 | 0,00079 | 1 |
| REACTOME_PURINE_CATABOLISM               | -0,117 | 0,001 | 0,04813 | 1 |
| PEART_HDAC_PROLIFERATION_CLUSTER_DN      | -0,117 | 0,001 | 0,01071 | 1 |
| PID_PI3KCIAKTPATHWAY                     | -0,117 | 0,001 | 0,01553 | 1 |
| SHAFFER_IRF4_TARGETS_IN_MYELOMA_VS_M     | -0,117 | 0,001 | 0,041   | 1 |
| HADDAD_B_LYMPHOCYTE_PROGENITOR           | -0,117 | 0,001 | 0,00047 | 1 |
| GRADE_COLON_CANCER_UP                    | -0,117 | 0,001 | 0,00815 | 1 |
| SESTO_RESPONSE_TO_UV_CO                  | -0,117 | 0,001 | 0,06547 | 1 |
| GSE13229_MATURE_VS_INTMATURE_NKCELL      | -0,117 | 0,001 | 0,00015 | 1 |
| ATF2_UP.V1_UP                            | -0,117 | 0,001 | 0,00019 | 1 |

|                                        |        |       |         |   |
|----------------------------------------|--------|-------|---------|---|
| INORGANIC_ANION_TRANSPORT              | -0,117 | 0,001 | 0,0011  | 1 |
| REACTOME_INFLUENZA_LIFE_CYCLE          | -0,117 | 0,001 | 0,00169 | 1 |
| BRUINS_UVC_RESPONSE_EARLY_LATE         | -0,117 | 0,001 | 0,0004  | 1 |
| KEGG_LEUKOCYTE_TRANSENDOTHELIAL_MIGF   | -0,117 | 0,001 | 0,00145 | 1 |
| GSE17974_CTRL_VS_ACT_IL4_AND_ANTI_IL   | -0,117 | 0,001 | 0,0462  | 1 |
| GSE27786_NKCELL_VS_MONO_MAC_DN         | -0,117 | 0,001 | 0,00052 | 1 |
| RNA_SPLICING_FACTOR_ACTIVITYTRANSESTE  | -0,117 | 0,001 | 0,05386 | 1 |
| PURBEY_TARGETS_OF_CTBP1_NOT_SATB1_L    | -0,117 | 0,001 | 0,00057 | 1 |
| CASTELLANO_HRAS_TARGETS_DN             | -0,117 | 0,001 | 0,00356 | 1 |
| PID_INTEGRIN3_PATHWAY                  | -0,117 | 0,001 | 0,00652 | 1 |
| LEARNING_AND_OR_MEMORY                 | -0,117 | 0,001 | 0,00409 | 1 |
| GSE339_CD8POS_VS_CD4CD8DN_DC_DN        | -0,117 | 0,001 | 0,00077 | 1 |
| REACTOME_MITOTIC_PROMETAPHASE          | -0,117 | 0,001 | 0,01142 | 1 |
| YU_BAP1_TARGETS                        | -0,117 | 0,001 | 0,01954 | 1 |
| SASSON_RESPONSE_TO_GONADOTROPHINS_I    | -0,117 | 0,001 | 0,00046 | 1 |
| MORF_BUB1                              | -0,117 | 0,001 | 0,01806 | 1 |
| GSE26495_PD1HIGH_VS_PD1LOW_CD8_TCEI    | -0,117 | 0,001 | 0,00014 | 1 |
| HASINA_NOL7_TARGETS_DN                 | -0,116 | 0,001 | 0,0479  | 1 |
| MODULE_166                             | -0,116 | 0,001 | 0,00031 | 1 |
| WHITFIELD_CELL_CYCLE_LITERATURE        | -0,116 | 0,001 | 0,00686 | 1 |
| TUBE_DEVELOPMENT                       | -0,116 | 0,001 | 0,00026 | 1 |
| LAU_APOPTOSIS_CDKN2A_UP                | -0,116 | 0,001 | 0,00359 | 1 |
| JAZAERI_BREAST_CANCER_BRCA1_VS_BRCA    | -0,116 | 0,001 | 0,16558 | 1 |
| KERATINOCYTE_DIFFERENTIATION           | -0,116 | 0,001 | 0,02648 | 1 |
| TAKEDA_TARGETS_OF_NUP98_HOXA9_FUSIC    | -0,116 | 0,001 | 0,00021 | 1 |
| REACTOME_A_TETRASACCHARIDE_LINKER_SE   | -0,116 | 0,001 | 0,0018  | 1 |
| DARWICHE_SKIN_TUMOR_PROMOTER_DN        | -0,116 | 0,001 | 0,00058 | 1 |
| GSE17721_LPS_VS_GARDIQUIMOD_2H_BMDM    | -0,116 | 0,001 | 0,0005  | 1 |
| MORF_EIF3S2                            | -0,116 | 0,001 | 0,05411 | 1 |
| GSE3982_CENT_MEMORY_CD4_TCELL_VS_TI    | -0,116 | 0,001 | 0,02652 | 1 |
| THUM_MIR21_TARGETS_HEART_DISEASE_DN    | -0,116 | 0,001 | 0,00289 | 1 |
| GSE5960_TH1_VS_ANERGIC_TH1_UP          | -0,116 | 0,001 | 0,00017 | 1 |
| GSE13411_NAIVE_VS_MEMORY_BCELL_DN      | -0,116 | 0,001 | 0,00336 | 1 |
| GSE3982_MAST_CELL_VS_BASOPHIL_UP       | -0,116 | 0,001 | 0,00523 | 1 |
| HALMOS_CEBPA_TARGETS_UP                | -0,116 | 0,001 | 0,00842 | 1 |
| GSE39820_IL1B_IL6_VS_IL1B_IL6_IL23A_TR | -0,116 | 0,001 | 0,0004  | 1 |
| GSE17721_POLYIC_VS_CPG_16H_BMDM_UP     | -0,116 | 0,001 | 0,00068 | 1 |
| MODULE_125                             | -0,116 | 0,001 | 0,00532 | 1 |
| E2F3_UP.V1_UP                          | -0,116 | 0,001 | 0,00025 | 1 |
| chr12q23                               | -0,116 | 0,001 | 0,00037 | 1 |
| AMUNDSON_GAMMA_RADIATION_RESISTANCE    | -0,116 | 0,002 | 0,00104 | 1 |
| REACTOME_SIGNALLING_TO_ERKS            | -0,116 | 0,002 | 0,00442 | 1 |

|                                          |        |       |         |   |
|------------------------------------------|--------|-------|---------|---|
| NADERI_BREAST_CANCER_PROGNOSIS_UP        | -0,116 | 0,002 | 0,04028 | 1 |
| REGULATION_OF_HYDROLASE_ACTIVITY         | -0,116 | 0,002 | 0,00551 | 1 |
| APOPTOSIS_GO                             | -0,116 | 0,002 | 0,00121 | 1 |
| OUILLETTE_CLL_13Q14_DELETION_UP          | -0,116 | 0,002 | 0,00743 | 1 |
| TSAI_DNAJB4_TARGETS_DN                   | -0,116 | 0,002 | 0,02661 | 1 |
| NAM_FXYD5_TARGETS_DN                     | -0,116 | 0,002 | 0,1336  | 1 |
| TATTATA,MIR-374                          | -0,116 | 0,002 | 0,00016 | 1 |
| GSE17721_POLYIC_VS_CPG_4H_BMDM_UP        | -0,116 | 0,002 | 0,00044 | 1 |
| REACTOME_PROCESSING_OF_CAPPED_INTRON     | -0,116 | 0,002 | 0,03835 | 1 |
| GSE360_CTRL_VS_B_MALAYI_HIGH_DOSE_D      | -0,116 | 0,002 | 0,00032 | 1 |
| VACUOLE_ORGANIZATION_AND_BIOGENESIS      | 0,116  | 0,002 | 0,01173 | 1 |
| MODULE_158                               | -0,116 | 0,002 | 0,0045  | 1 |
| MAHADEVAN_IMATINIB_RESISTANCE_UP         | -0,116 | 0,002 | 0,00033 | 1 |
| PARK_HSC_VS_MULTIPOTENT_PROGENITORS      | -0,116 | 0,002 | 0,05716 | 1 |
| OXFORD_RALA_TARGETS_DN                   | -0,116 | 0,002 | 0,00173 | 1 |
| MORF_THPO                                | -0,116 | 0,002 | 0,0004  | 1 |
| KEGG_GLYCOSAMINOGLYCAN_BIOSYNTHESIS      | -0,116 | 0,002 | 0,00426 | 1 |
| PEPTIDYL_AMINO_ACID_MODIFICATION         | -0,116 | 0,002 | 0,01713 | 1 |
| REACTOME_DEADENYLATION_OF_MRNA           | -0,115 | 0,002 | 0,01072 | 1 |
| TURJANSKI_MAPK7_TARGETS                  | -0,115 | 0,002 | 0,00123 | 1 |
| GNF2_MBD4                                | -0,115 | 0,002 | 0,00023 | 1 |
| REACTOME_GABA_B_RECEPTOR_ACTIVATION      | -0,115 | 0,002 | 0,00014 | 1 |
| MODULE_121                               | -0,115 | 0,002 | 0,00052 | 1 |
| KINESIN_COMPLEX                          | -0,115 | 0,002 | 0,00923 | 1 |
| ESC_J1_UP_EARLY.V1_DN                    | -0,115 | 0,002 | 0,00024 | 1 |
| CELL_FATE_COMMITMENT                     | -0,115 | 0,002 | 0,00097 | 1 |
| GSE360_L_DONOVANI_VS_B_MALAYI_LOW        | -0,115 | 0,002 | 0,00473 | 1 |
| INAMURA_LUNG_CANCER_SCC_SUBTYPES_UP      | -0,115 | 0,002 | 0,01247 | 1 |
| MODULE_242                               | -0,115 | 0,002 | 0,00042 | 1 |
| KUWANO_RNA_STABILIZED_BY_NO              | -0,115 | 0,002 | 0,0021  | 1 |
| FORTSCHEGGER_PHF8_TARGETS_DN             | -0,115 | 0,002 | 0,00053 | 1 |
| GSE27786_LSK_VS_CD4_TCELL_UP             | -0,115 | 0,002 | 0,00082 | 1 |
| TGTTTAC,MIR-30A-5P,MIR-30C,MIR-30D,MIR-3 | -0,115 | 0,002 | 0,00048 | 1 |
| GSE17580_TREG_VS_TEFF_UP                 | -0,115 | 0,002 | 0,00019 | 1 |
| GRAHAM_CML QUIESCENT_VS_CML_DIVIDING     | -0,115 | 0,002 | 0,0218  | 1 |
| GSE17721_LPS_VS_PAM3CSK4_4H_BMDM_C       | -0,115 | 0,002 | 0,00186 | 1 |
| SHIN_B_CELL_LYMPHOMA_CLUSTER_9           | -0,115 | 0,002 | 0,02306 | 1 |
| PKCA_DN.V1_DN                            | -0,115 | 0,002 | 0,00022 | 1 |
| REACTOME_REGULATION_OF_GLYCOKINASE_I     | -0,115 | 0,002 | 0,02134 | 1 |
| DNA_REPAIR                               | -0,115 | 0,002 | 0,00026 | 1 |
| GCM_SMARCC1                              | -0,115 | 0,002 | 0,0008  | 1 |
| GSE17721_LPS_VS_GARDIQUIMOD_24H_BMC      | -0,115 | 0,002 | 0,02256 | 1 |

|                                      |        |       |         |   |
|--------------------------------------|--------|-------|---------|---|
| MODULE_207                           | -0,115 | 0,002 | 0,0015  | 1 |
| CASPASE_ACTIVATION                   | -0,115 | 0,002 | 0,0068  | 1 |
| REACTOME_G2_M_CHECKPOINTS            | -0,115 | 0,002 | 0,00995 | 1 |
| MODULE_534                           | -0,115 | 0,002 | 0,04786 | 1 |
| HAHTOLA_MYCOSIS_FUNGOIDES_SKIN_DN    | -0,115 | 0,002 | 0,08586 | 1 |
| BARRIER_CANCER_RELAPSE_TUMOR_SAMPLE  | -0,115 | 0,002 | 0,00134 | 1 |
| VALK_AML_CLUSTER_2                   | -0,115 | 0,002 | 0,00278 | 1 |
| CYCLIN_D1_UP.V1_UP                   | -0,115 | 0,002 | 0,00055 | 1 |
| GCM_TPT1                             | -0,115 | 0,002 | 0,00088 | 1 |
| CHROMATIN_ASSEMBLY                   | -0,115 | 0,002 | 0,00241 | 1 |
| KYNG_NORMAL_AGING_UP                 | -0,115 | 0,002 | 0,00637 | 1 |
| MORF_ZNF10                           | -0,115 | 0,002 | 0,00109 | 1 |
| GSE9650_EXHAUSTED_VS_MEMORY_CD8_TC   | -0,115 | 0,002 | 0,00276 | 1 |
| FOSTER_KDM1A_TARGETS_UP              | -0,115 | 0,002 | 0,00124 | 1 |
| ZHANG_TLX_TARGETS_36HR_DN            | -0,115 | 0,002 | 0,0162  | 1 |
| GRAHAM_CML QUIESCENT_VS_NORMAL_QUIE  | -0,115 | 0,002 | 0,00095 | 1 |
| MODULE_259                           | -0,115 | 0,002 | 0,00038 | 1 |
| GSE39820_CTRL_VS_TGFBETA3_IL6_IL23A_ | -0,115 | 0,002 | 0,00558 | 1 |
| MODULE_354                           | -0,115 | 0,002 | 0,00028 | 1 |
| TRANSLATION                          | -0,115 | 0,002 | 0,00246 | 1 |
| AMIT_SERUM_RESPONSE_240_MCF10A       | -0,115 | 0,002 | 0,03606 | 1 |
| REACTOME_APOPTOSIS_INDUCED_DNA_FRAG  | -0,115 | 0,002 | 0,03106 | 1 |
| PID_FAK_PATHWAY                      | -0,115 | 0,002 | 0,00256 | 1 |
| MODULE_90                            | -0,115 | 0,002 | 0,05155 | 1 |
| CHIBA_RESPONSE_TO_TSA_DN             | -0,115 | 0,002 | 0,04315 | 1 |
| CHARAFE_BREAST_CANCER_BASAL_VS_MESI  | -0,115 | 0,002 | 0,03467 | 1 |
| TTGCCAA,MIR-182                      | -0,115 | 0,002 | 0,00036 | 1 |
| RICKMAN_METASTASIS_UP                | -0,115 | 0,002 | 0,00023 | 1 |
| ELLWOOD_MYC_TARGETS_UP               | -0,115 | 0,002 | 0,05016 | 1 |
| MORF_NPM1                            | -0,115 | 0,002 | 0,00392 | 1 |
| GSE22886_UNSTIM_VS_STIM_MEMORY_TCEL  | -0,115 | 0,002 | 0,10704 | 1 |
| GSE22886_NAIVE_CD4_TCELL_VS_48H_ACT  | -0,115 | 0,002 | 0,05847 | 1 |
| REACTOME_PACKAGING_OF_TELOMERE_ENDS  | -0,115 | 0,002 | 0,03811 | 1 |
| SECOND_MESSENGER_MEDIATED_SIGNALING  | -0,115 | 0,002 | 0,00014 | 1 |
| GREENBAUM_E2A_TARGETS_UP             | -0,114 | 0,002 | 0,01747 | 1 |
| REACTOME_ACTIVATION_OF_GENES_BY_ATF  | -0,114 | 0,002 | 0,03378 | 1 |
| NATSUME_RESPONSE_TO_INTERFERON_BETA  | -0,114 | 0,002 | 0,00202 | 1 |
| REACTOME_MITOTIC_M_M_G1_PHASES       | -0,114 | 0,002 | 0,0238  | 1 |
| WNT_SIGNALING                        | -0,114 | 0,002 | 0,00027 | 1 |
| REACTOME_CELL_EXTRACELLULAR_MATRIX_I | -0,114 | 0,002 | 0,0032  | 1 |
| REACTOME_SEMA3A_PAK_DEPENDENT_AXON   | -0,114 | 0,002 | 0,03585 | 1 |
| MODULE_571                           | -0,114 | 0,002 | 0,0009  | 1 |

|                                       |        |       |         |   |
|---------------------------------------|--------|-------|---------|---|
| BIOCARTA_CBL_PATHWAY                  | -0,114 | 0,002 | 0,00747 | 1 |
| GCM_PRKCG                             | -0,114 | 0,002 | 0,00099 | 1 |
| GSE1448_ANTI_VALPHA2_VS_VBETA5_DP_    | -0,114 | 0,002 | 0,00077 | 1 |
| ATACCTC,MIR-202                       | -0,114 | 0,002 | 0,00033 | 1 |
| MORF_PTEN                             | -0,114 | 0,002 | 0,00411 | 1 |
| REACTOME_REGULATION_OF_KIT_SIGNALING  | -0,114 | 0,002 | 0,00586 | 1 |
| BROWNE_HCMV_INFECTION_4HR_UP          | -0,114 | 0,002 | 0,00036 | 1 |
| LIU_CMYB_TARGETS_DN                   | -0,114 | 0,002 | 0,01948 | 1 |
| KOKKINAKIS_METHIONINE_DEPRIVATION_48H | -0,114 | 0,002 | 0,00319 | 1 |
| BIOCARTA_STATHMIN_PATHWAY             | -0,114 | 0,002 | 0,00122 | 1 |
| SMID_BREAST_CANCER_NORMAL_LIKE_UP     | -0,114 | 0,002 | 0,00014 | 1 |
| TIEN_INTESTINE_PROBIOTICS_2HR_DN      | -0,114 | 0,002 | 0,0167  | 1 |
| GSE17721_CTRL_VS_CPG_12H_BMDM_DN      | -0,114 | 0,002 | 0,01824 | 1 |
| ZUCCHI_METASTASIS_DN                  | -0,114 | 0,002 | 0,00232 | 1 |
| chr11q23                              | -0,114 | 0,002 | 0,00121 | 1 |
| TGCACTG,MIR-148A,MIR-152,MIR-148B     | -0,114 | 0,002 | 0,00019 | 1 |
| LINDGREN_BLADDER_CANCER_CLUSTER_3_UI  | -0,114 | 0,002 | 0,03457 | 1 |
| chr7q31                               | -0,114 | 0,002 | 0,00054 | 1 |
| V\$NFKB_Q6_01                         | -0,114 | 0,002 | 0,00043 | 1 |
| DNA_DIRECTED_DNA_POLYMERASE_ACTIVITY  | -0,114 | 0,002 | 0,00086 | 1 |
| NIKOLSKY_BREAST_CANCER_16Q24_AMPLI    | -0,114 | 0,002 | 0,02601 | 1 |
| GSE9650_NAIVE_VS_EXHAUSTED_CD8_TCEL   | -0,114 | 0,002 | 0,00124 | 1 |
| KEGG_VIBRIO_CHOLERAE_INFECTION        | -0,114 | 0,002 | 0,14488 | 1 |
| BORCZUK_MALIGNANT_MESOTHELIOMA_UP     | -0,114 | 0,002 | 0,08752 | 1 |
| GSE27786_CD8_TCELL_VS_MONO_MAC_UP     | -0,114 | 0,002 | 0,00279 | 1 |
| MIYAGAWA_TARGETS_OF_EWSR1_ETS_FUSIC   | -0,114 | 0,002 | 0,00152 | 1 |
| HYDROLASE_ACTIVITY_ACTING_ON_ESTER_B  | -0,114 | 0,002 | 0,0005  | 1 |
| GSE26495_PD1HIGH_VS_PD1LOW_CD8_TCEI   | -0,114 | 0,002 | 0,00016 | 1 |
| SCHEIDEREIT_IKK_INTERACTING_PROTEINS  | -0,114 | 0,002 | 0,00156 | 1 |
| REACTOME_METABOLISM_OF_NON_CODING_F   | -0,114 | 0,002 | 0,02519 | 1 |
| REGULATION_OF_CYTOKINE_PRODUCTION     | -0,114 | 0,002 | 0,00192 | 1 |
| LEE_LIVER_CANCER_HEPATOBLAST          | -0,114 | 0,002 | 0,00359 | 1 |
| V\$STAT3_01                           | -0,114 | 0,002 | 0,00042 | 1 |
| SHETH_LIVER_CANCER_VS_TXNIP_LOSS_PAM  | -0,114 | 0,002 | 0,00029 | 1 |
| PID_S1P_META_PATHWAY                  | -0,114 | 0,002 | 0,00046 | 1 |
| NUCLEAR_PORE                          | -0,114 | 0,002 | 0,10571 | 1 |
| CLAUS_PGR_POSITIVE_MENINGIOMA_DN      | -0,114 | 0,002 | 0,00031 | 1 |
| MORF_UBE2N                            | -0,114 | 0,002 | 0,08276 | 1 |
| REACTOME_PROCESSING_OF_INTRONLESS_PR  | -0,114 | 0,002 | 0,08842 | 1 |
| chr3q12                               | -0,114 | 0,002 | 0,02481 | 1 |
| REACTOME_REGULATION_OF_INSULIN_SECRE  | -0,114 | 0,002 | 0,0208  | 1 |
| GSE1460_CORD_VS_ADULT_BLOOD_NAIVE_I   | -0,114 | 0,002 | 0,00299 | 1 |

|                                         |        |       |         |   |
|-----------------------------------------|--------|-------|---------|---|
| GSE3982_DC_VS_NEUTROPHIL_DN             | -0,114 | 0,002 | 0,0006  | 1 |
| GSE17580_TREG_VS_TEFF_S_MANSONI_INF     | -0,114 | 0,002 | 0,00087 | 1 |
| WELCSH_BRCA1_TARGETS_UP                 | -0,114 | 0,002 | 0,0095  | 1 |
| COULOUARN_TEMPORAL_TGFB1_SIGNATURE      | -0,113 | 0,002 | 0,00609 | 1 |
| BIOCARTA_RB_PATHWAY                     | -0,113 | 0,002 | 0,00605 | 1 |
| MICROBODY                               | 0,113  | 0,002 | 0,02218 | 1 |
| PEROXISOME                              | 0,113  | 0,002 | 0,02218 | 1 |
| JAZAERI_BREAST_CANCER_BRCA1_VS_BRCA     | -0,113 | 0,002 | 0,00065 | 1 |
| SCHMAHL_PDGF_SIGNALING                  | -0,113 | 0,002 | 0,00034 | 1 |
| CAIRO_HEPATOBLASTOMA_POOR_SURVIVAL      | -0,113 | 0,002 | 0,00774 | 1 |
| OSWALD_HEMATOPOIETIC_STEM_CELL_IN_CC    | -0,113 | 0,002 | 0,0005  | 1 |
| VESICLE_MEMBRANE                        | -0,113 | 0,002 | 0,0143  | 1 |
| MODULE_122                              | -0,113 | 0,002 | 0,00052 | 1 |
| MODULE_379                              | -0,113 | 0,002 | 0,00053 | 1 |
| NUCLEAR_MEMBRANE                        | -0,113 | 0,002 | 0,05873 | 1 |
| FARMER_BREAST_CANCER_CLUSTER_2          | -0,113 | 0,002 | 0,01675 | 1 |
| PUIFFE_INVASION_INHIBITED_BY_ASCITES_UP | -0,113 | 0,002 | 0,07626 | 1 |
| GTCAGGA,MIR-378                         | -0,113 | 0,002 | 0,00131 | 1 |
| SWEET_LUNG_CANCER_KRAS_UP               | -0,113 | 0,002 | 0,02057 | 1 |
| MORF_HDAC2                              | -0,113 | 0,002 | 0,13544 | 1 |
| MORF_BCL2L1                             | -0,113 | 0,002 | 0,00099 | 1 |
| TRANSLATION_FACTOR_ACTIVITY_NUCLEIC_A   | -0,113 | 0,002 | 0,08128 | 1 |
| TIEN_INTESTINE_PROBIOTICS_6HR_DN        | -0,113 | 0,002 | 0,00738 | 1 |
| chr13q33                                | -0,113 | 0,002 | 0,00271 | 1 |
| SHAFFER_IRF4_MULTIPLE_MYELOMA_PROGRA    | -0,113 | 0,002 | 0,02411 | 1 |
| JOHNSTONE_PARVB_TARGETS_3_DN            | -0,113 | 0,002 | 0,04472 | 1 |
| REACTOME_KERATAN_SULFATE_BIOSYNTHES     | -0,113 | 0,002 | 0,00323 | 1 |
| PETROVA_PROX1_TARGETS_DN                | -0,113 | 0,002 | 0,0041  | 1 |
| FEEDING_BEHAVIOR                        | -0,113 | 0,002 | 0,00406 | 1 |
| GHANDHI_BYSTANDER_IRRADIATION_UP        | -0,113 | 0,002 | 0,02012 | 1 |
| GSE15930_STIM_VS_STIM_AND_TRICHOSTA1    | -0,113 | 0,002 | 0,00323 | 1 |
| SABATES_COLORECTAL_ADENOMA_SIZE_DN      | 0,113  | 0,002 | 0,05846 | 1 |
| WANG_ESOPHAGUS_CANCER_VS_NORMAL_U       | -0,113 | 0,002 | 0,0025  | 1 |
| GSE17721_CTRL_VS_POLYIC_24H_BMDM_DN     | -0,113 | 0,002 | 0,00515 | 1 |
| GSE17721_CTRL_VS_CPG_12H_BMDM_UP        | -0,113 | 0,002 | 0,00031 | 1 |
| CALVET_IRINOTECAN_SENSITIVE_VS_RESISTA  | -0,113 | 0,002 | 0,00396 | 1 |
| V\$CEBP_Q3                              | -0,113 | 0,002 | 0,00017 | 1 |
| LEE_LIVER_CANCER_ACOX1_UP               | -0,113 | 0,002 | 0,00583 | 1 |
| NEGATIVE_REGULATION_OF_CELLULAR_COMI    | -0,113 | 0,002 | 0,01774 | 1 |
| TONKS_TARGETS_OF_RUNX1_RUNX1T1_FUSI     | -0,113 | 0,002 | 0,00014 | 1 |
| CHIANG_LIVER_CANCER_SUBCLASS_CTNNB1     | -0,113 | 0,002 | 0,00035 | 1 |
| ENDOTHELIAL_CELL_MIGRATION              | -0,113 | 0,002 | 0,07949 | 1 |

|                                       |        |       |         |   |
|---------------------------------------|--------|-------|---------|---|
| ABBUD_LIF_SIGNALING_2_DN              | -0,113 | 0,002 | 0,00013 | 1 |
| GSE17974_1.5H_VS_72H_IL4_AND_ANTI_IL  | -0,113 | 0,002 | 0,01411 | 1 |
| DIGESTION                             | -0,113 | 0,002 | 0,00563 | 1 |
| GSE17721_CTRL_VS_POLYIC_6H_BMDM_DN    | -0,113 | 0,002 | 0,00055 | 1 |
| chrXq11                               | -0,113 | 0,002 | 0,00353 | 1 |
| ZHENG_FOXP3_TARGETS_DN                | -0,113 | 0,002 | 0,00373 | 1 |
| REACTOME_CELL_CYCLE_CHECKPOINTS       | -0,113 | 0,002 | 0,03517 | 1 |
| DAZARD_RESPONSE_TO_UV_NHEK_DN         | -0,113 | 0,002 | 0,00515 | 1 |
| CHROMOSOME PERICENTRIC_REGION         | -0,113 | 0,002 | 0,01414 | 1 |
| SPINDLE_POLE                          | -0,113 | 0,002 | 0,02714 | 1 |
| ADP_BINDING                           | -0,113 | 0,002 | 0,01009 | 1 |
| V\$CEBPA_01                           | -0,113 | 0,002 | 0,00478 | 1 |
| V\$NFKB_Q6                            | -0,113 | 0,002 | 0,00017 | 1 |
| GNF2_HAT1                             | -0,113 | 0,002 | 0,04295 | 1 |
| GSE13738_TCR_VS_BYSTANDER_ACTIVATED   | -0,113 | 0,002 | 0,00039 | 1 |
| REACTOME_SEMAPHORIN_INTERACTIONS      | -0,113 | 0,002 | 0,00087 | 1 |
| ACTIN_CYTOSKELETON                    | -0,113 | 0,002 | 0,00046 | 1 |
| INTRACELLULAR_SIGNALING_CASCADE       | -0,113 | 0,002 | 0,00048 | 1 |
| PROTEIN_DIMERIZATION_ACTIVITY         | -0,113 | 0,002 | 0,00014 | 1 |
| MATZUK_MATERNAL_EFFECT                | -0,113 | 0,002 | 0,00527 | 1 |
| ATP_DEPENDENT_DNA_HELICASE_ACTIVITY   | -0,112 | 0,002 | 0,00697 | 1 |
| MALE_GONAD_DEVELOPMENT                | -0,112 | 0,002 | 0,01968 | 1 |
| DAMAGED_DNA_BINDING                   | -0,112 | 0,002 | 0,00171 | 1 |
| GSE17721_PAM3CSK4_VS_GADIQUIMOD_6H    | -0,112 | 0,002 | 0,00807 | 1 |
| EXONUCLEASE_ACTIVITY                  | -0,112 | 0,002 | 0,01227 | 1 |
| WEIGEL_OXIDATIVE_STRESS_BY_TBH_AND_H  | -0,112 | 0,002 | 0,00638 | 1 |
| REACTOME_INTEGRIN_CELL_SURFACE_INTERA | -0,112 | 0,002 | 0,0021  | 1 |
| OHM_EMBRYONIC_CARCINOMA_DN            | -0,112 | 0,002 | 0,00027 | 1 |
| GSE9650_EFFECTOR_VS_MEMORY_CD8_TCEL   | -0,112 | 0,002 | 0,02973 | 1 |
| GSE27786_LSK_VS_MONO_MAC_DN           | -0,112 | 0,002 | 0,00146 | 1 |
| PHONG_TNF_TARGETS_UP                  | -0,112 | 0,002 | 0,00105 | 1 |
| INTRA_GOLGI_VESICLE_MEDIATED_TRANSPOF | 0,112  | 0,002 | 0,02471 | 1 |
| GSE14350_IL2RB_KO_VS_WT_TREG_UP       | -0,112 | 0,002 | 0,00073 | 1 |
| GSE27786_CD4_TCELL_VS_NEUTROPHIL_UP   | -0,112 | 0,002 | 0,00323 | 1 |
| MENSSSEN_MYC_TARGETS                  | -0,112 | 0,002 | 0,17343 | 1 |
| V\$AML_Q6                             | -0,112 | 0,002 | 0,00023 | 1 |
| GSE20715_0H_VS_6H_OZONE_TLR4_KO_LU    | -0,112 | 0,002 | 0,00023 | 1 |
| PID_ERBB1_DOWNSTREAM_PATHWAY          | -0,112 | 0,002 | 0,00275 | 1 |
| NUCLEAR_ENVELOPE                      | -0,112 | 0,002 | 0,03094 | 1 |
| GSE360_L_MAJOR_VS_M_TUBERCULOSIS_MA   | -0,112 | 0,002 | 0,00061 | 1 |
| KINASE_REGULATOR_ACTIVITY             | -0,112 | 0,002 | 0,00088 | 1 |
| V\$ETS1_B                             | -0,112 | 0,002 | 0,00018 | 1 |



|                                        |        |       |         |   |
|----------------------------------------|--------|-------|---------|---|
| BANDRES_RESPONSE_TO_CARMUSTIN_WITHO    | -0,112 | 0,002 | 0,00047 | 1 |
| WELCSH_BRCA1_TARGETS_DN                | -0,112 | 0,002 | 0,04918 | 1 |
| GUTIERREZ_CHRONIC_LYMPHOCYTIC_LEUKEMI  | -0,112 | 0,002 | 0,004   | 1 |
| chr1p21                                | -0,112 | 0,002 | 0,00128 | 1 |
| GLUTAMINE_FAMILY_AMINO_ACID_METABOLIA  | 0,112  | 0,002 | 0,00597 | 1 |
| ANION_TRANSPORT                        | -0,112 | 0,002 | 0,00106 | 1 |
| WANG_RESPONSE_TO_BEXAROTENE_UP         | -0,112 | 0,002 | 0,03511 | 1 |
| PID_AVB3_INTEGRIN_PATHWAY              | -0,112 | 0,002 | 0,00053 | 1 |
| N_ACYLTRANSFERASE_ACTIVITY             | 0,112  | 0,002 | 0,02983 | 1 |
| chr13q12                               | -0,112 | 0,002 | 0,00083 | 1 |
| MODULE_210                             | -0,112 | 0,002 | 0,02554 | 1 |
| GSE15930_NAIVE_VS_72H_IN_VITRO_STIM_   | -0,112 | 0,002 | 0,04202 | 1 |
| GSE11057_EFF_MEM_VS_CENT_MEM_CD4_T     | -0,112 | 0,002 | 0,00178 | 1 |
| GSE17721_POLYIC_VS_CPG_2H_BMDM_UP      | -0,112 | 0,002 | 0,00143 | 1 |
| REACTOME_SIGNALING_BY_THE_B_CELL_REC   | -0,112 | 0,002 | 0,02554 | 1 |
| GSE360_L_DONOVANI_VS_B_MALAYI_LOW_     | -0,112 | 0,002 | 0,00284 | 1 |
| REACTOME_FANCONI_ANEMIA_PATHWAY        | -0,112 | 0,002 | 0,01112 | 1 |
| GCNP_SHH_UP_LATE.V1_DN                 | -0,112 | 0,002 | 0,00071 | 1 |
| AMYLOID_PRECURSOR_PROTEIN_METABOLIC_   | 0,112  | 0,002 | 0,02852 | 1 |
| PUJANA_BREAST_CANCER_LIT_INT_NETWORKI  | -0,112 | 0,002 | 0,01101 | 1 |
| CASTELLANO_HRAS_AND_NRAS_TARGETS_U     | -0,112 | 0,002 | 0,00612 | 1 |
| SPIELMAN_LYMPHOBLAST_EUROPEAN_VS_AS    | -0,112 | 0,002 | 0,01029 | 1 |
| RASHI_RESPONSE_TO_IONIZING_RADIATION_1 | -0,112 | 0,002 | 0,00019 | 1 |
| NAGY_PCAF_COMPONENTS_HUMAN             | -0,112 | 0,002 | 0,00161 | 1 |
| MORF_IL4                               | -0,112 | 0,002 | 0,00052 | 1 |
| POSITIVE_REGULATION_OF_CASPASE_ACTIVIT | -0,112 | 0,002 | 0,00555 | 1 |
| HEART_DEVELOPMENT                      | -0,112 | 0,002 | 0,00017 | 1 |
| GSE17974_0H_VS_48H_IN_VITRO_ACT_CD4    | -0,112 | 0,002 | 0,03704 | 1 |
| GSE17721_0.5H_VS_4H_POLYIC_BMDM_UP     | -0,112 | 0,002 | 0,00062 | 1 |
| DAZARD_UV_RESPONSE_CLUSTER_G24         | -0,112 | 0,002 | 0,0188  | 1 |
| GSE18791_CTRL_VS_NEWCASTLE_VIRUS_DC    | -0,112 | 0,002 | 0,00909 | 1 |
| REACTOME_POST_NMDA_RECEPTOR_ACTIVAT    | -0,112 | 0,002 | 0,0006  | 1 |
| HOFFMANN_PRE_BI_TO_LARGE_PRE_BII_LYMI  | -0,112 | 0,002 | 0,00165 | 1 |
| GSE6269_HEALTHY_VS_STREP_AUREUS_INF_   | -0,112 | 0,002 | 0,0002  | 1 |
| BIOCARTA_CXCR4_PATHWAY                 | -0,112 | 0,002 | 0,014   | 1 |
| chr15q11                               | -0,112 | 0,002 | 0,01543 | 1 |
| TRANSLATION_INITIATION_FACTOR_ACTIVITY | -0,112 | 0,002 | 0,11595 | 1 |
| MORF_UBE2I                             | -0,112 | 0,002 | 0,01667 | 1 |
| LI_AMPLIFIED_IN_LUNG_CANCER            | -0,112 | 0,002 | 0,04536 | 1 |
| MARTINEZ_TP53_TARGETS_UP               | -0,112 | 0,002 | 0,00031 | 1 |
| GTATTAT,MIR-369-3P                     | -0,112 | 0,002 | 0,00107 | 1 |
| COLLER_MYC_TARGETS_UP                  | -0,112 | 0,002 | 0,12388 | 1 |

|                                       |        |       |         |   |
|---------------------------------------|--------|-------|---------|---|
| GSE27786_CD8_TCELL_VS_NEUTROPHIL_DN   | -0,112 | 0,002 | 0,00204 | 1 |
| COLLAGEN                              | -0,112 | 0,002 | 0,00122 | 1 |
| RODRIGUES_THYROID_CARCIOMA_DN         | -0,112 | 0,002 | 0,00144 | 1 |
| REACTOME_AMINE_LIGAND_BINDING_RECEPTI | -0,112 | 0,002 | 0,00074 | 1 |
| GTAAGAT,MIR-200A                      | -0,112 | 0,002 | 0,00168 | 1 |
| MORF_ESR1                             | -0,112 | 0,002 | 0,00038 | 1 |
| GSE27786_NKCELL_VS_MONO_MAC_UP        | -0,111 | 0,002 | 0,00086 | 1 |
| CELLULAR_COMPONENT_DISASSEMBLY        | -0,111 | 0,002 | 0,00612 | 1 |
| chr18q22                              | -0,111 | 0,002 | 0,0003  | 1 |
| MODULE_337                            | -0,111 | 0,002 | 0,05946 | 1 |
| CTACTGT,MIR-199A                      | -0,111 | 0,002 | 0,00048 | 1 |
| BIOCARTA_MAPK_PATHWAY                 | -0,111 | 0,002 | 0,0004  | 1 |
| ZHAN_MULTIPLE_MYELOMA_PR_UP           | -0,111 | 0,002 | 0,01601 | 1 |
| GSE18791_CTRL_VS_NEWCASTLE_VIRUS_DC   | -0,111 | 0,002 | 0,00039 | 1 |
| BASE_EXCISION_REPAIR                  | -0,111 | 0,002 | 0,00027 | 1 |
| MORF_DDB1                             | -0,111 | 0,002 | 0,06621 | 1 |
| GSE11864_CSF1_VS_CSF1_IFNG_PAM3CYS_   | -0,111 | 0,002 | 0,04026 | 1 |
| MORF_PCNA                             | -0,111 | 0,002 | 0,0604  | 1 |
| MAINTENANCE_OF_PROTEIN_LOCALIZATION   | -0,111 | 0,002 | 0,03616 | 1 |
| KYNG_DNA_DAMAGE_BY_GAMMA_RADIATION    | -0,111 | 0,002 | 0,00157 | 1 |
| MORF_DEK                              | -0,111 | 0,002 | 0,09119 | 1 |
| CAGTATT,MIR-200B,MIR-200C,MIR-429     | -0,111 | 0,002 | 0,00039 | 1 |
| GSE8515_IL1_VS_IL6_4H_STIM_)MAC_UP    | -0,111 | 0,002 | 0,01415 | 1 |
| REACTOME_HIV_INFECTION                | -0,111 | 0,002 | 0,07117 | 1 |
| ACTWSNACTNY_UNKNOWN                   | -0,111 | 0,002 | 0,00039 | 1 |
| SASAI_TARGETS_OF_CXCR6_AND_PTCH1_DM   | -0,111 | 0,002 | 0,00261 | 1 |
| MODULE_184                            | 0,111  | 0,002 | 0,09649 | 1 |
| CARD_MIR302A_TARGETS                  | -0,111 | 0,002 | 0,00256 | 1 |
| MORF_MAP2K7                           | -0,111 | 0,002 | 0,00073 | 1 |
| MARIADASON_RESPONSE_TO_BUTYRATE_CUF   | -0,111 | 0,002 | 0,00975 | 1 |
| ATCATGA,MIR-433                       | -0,111 | 0,002 | 0,00043 | 1 |
| MODULE_199                            | -0,111 | 0,002 | 0,00015 | 1 |
| KYNG_DNA_DAMAGE_BY_4NQO_OR_GAMMA_     | -0,111 | 0,002 | 0,00107 | 1 |
| N_ACETYLTRANSFERASE_ACTIVITY          | 0,111  | 0,002 | 0,03177 | 1 |
| HASLINGER_B_CLL_WITH_13Q14_DELETION   | -0,111 | 0,002 | 0,00151 | 1 |
| GSE17721_LPS_VS_GARDIQUIMOD_0.5H_BMI  | -0,111 | 0,002 | 0,00048 | 1 |
| BIOCARTA_P27_PATHWAY                  | -0,111 | 0,002 | 0,01211 | 1 |
| TANAKA_METHYLATED_IN_ESOPHAGEAL_CAI   | -0,111 | 0,002 | 0,00177 | 1 |
| GSE11864_UNTREATED_VS_CSF1_IN_MAC_L   | -0,111 | 0,002 | 0,00026 | 1 |
| GSE13485_CTRL_VS_DAY21_YF17D_VACCIN   | -0,111 | 0,002 | 0,0097  | 1 |
| GRAHAM_NORMAL QUIESCENT_VS_NORMAL_    | -0,111 | 0,002 | 0,00306 | 1 |
| CHROMOSOME_SEGREGATION                | -0,111 | 0,002 | 0,01161 | 1 |

|                                         |        |       |         |   |
|-----------------------------------------|--------|-------|---------|---|
| DEBIASI_APOPTOSIS_BY_REOVIRUS_INFECTIOI | -0,111 | 0,002 | 0,00412 | 1 |
| GSE29618_BCELL_VS_MDC_DAY7_FLU_VAC      | -0,111 | 0,002 | 0,00164 | 1 |
| SCHEIDEREIT_IKK_TARGETS                 | 0,111  | 0,002 | 0,45531 | 1 |
| GSE27786_ERYTHROBLAST_VS_MONO_MAC_      | -0,111 | 0,002 | 0,00042 | 1 |
| EXTRACELLULAR_REGION                    | -0,111 | 0,002 | 0,00048 | 1 |
| GSE17721_CTRL_VS_GARDIQUIMOD_2H_BME     | -0,111 | 0,002 | 0,0003  | 1 |
| FERRANDO_T_ALL_WITH_MLL_ENL_FUSION_     | -0,111 | 0,002 | 0,00208 | 1 |
| MULLIGHAN_NPM1_MUTATED_SIGNATURE_1_     | -0,111 | 0,002 | 0,00067 | 1 |
| GSE17721_POLYIC_VS_PAM3CSK4_0.5H_BM     | -0,111 | 0,002 | 0,00481 | 1 |
| CHROMATIN_REMODELING_COMPLEX            | -0,111 | 0,002 | 0,00245 | 1 |
| MODULE_341                              | -0,111 | 0,002 | 0,02941 | 1 |
| LEE_AGING_NEOCORTEX_DN                  | -0,111 | 0,002 | 0,00044 | 1 |
| MIKKELSEN_MEF_HCP_WITH_H3K27ME3         | -0,111 | 0,003 | 0,00032 | 1 |
| GSE15659_NAIVE_VS_PTPRC_NEG_CD4_TCE     | -0,111 | 0,003 | 0,00033 | 1 |
| ALK_DN.V1_UP                            | -0,111 | 0,003 | 0,00602 | 1 |
| GSE17721_0.5H_VS_12H_GARDIQUIMOD_BM     | -0,111 | 0,003 | 0,01633 | 1 |
| GNF2_RAN                                | -0,111 | 0,003 | 0,11871 | 1 |
| RIBONUCLEOPROTEIN_COMPLEX_BIOGENESIS_   | -0,111 | 0,003 | 0,02923 | 1 |
| REACTOME_E2F_ENABLED_INHIBITION_OF_PR   | -0,111 | 0,003 | 0,01393 | 1 |
| GROSS_HYPOXIA_VIA_ELK3_DN               | -0,11  | 0,003 | 0,00556 | 1 |
| FERNANDEZ_BOUND_BY_MYC                  | -0,11  | 0,003 | 0,01537 | 1 |
| ENZYME_REGULATOR_ACTIVITY               | -0,11  | 0,003 | 0,00014 | 1 |
| GAUTSCHI_SRC_SIGNALING                  | -0,11  | 0,003 | 0,00031 | 1 |
| chr18p11                                | -0,11  | 0,003 | 0,00178 | 1 |
| WALLACE_JAK2_TARGETS_UP                 | -0,11  | 0,003 | 0,02136 | 1 |
| ST_JAK_STAT_PATHWAY                     | -0,11  | 0,003 | 0,00215 | 1 |
| XU_HGF_TARGETS_REPRESSED_BY_AKT1_DN     | -0,11  | 0,003 | 0,00054 | 1 |
| GSE28237_FOLLICULAR_VS_LATE_GC_BCELL    | -0,11  | 0,003 | 0,00028 | 1 |
| SAKAI_TUMOR_INFILTRATING_MONOCYTES_U    | -0,11  | 0,003 | 0,00556 | 1 |
| KRAS.LUNG_UP.V1_UP                      | -0,11  | 0,003 | 0,00223 | 1 |
| GSE3982_DC_VS_NEUTROPHIL_LPS_STIM_UP    | -0,11  | 0,003 | 0,00786 | 1 |
| GSE360_CTRL_VS_M_TUBERCULOSIS_MAC_D     | -0,11  | 0,003 | 0,00341 | 1 |
| RODWELL_AGING_KIDNEY_NO_BLOOD_UP        | -0,11  | 0,003 | 0,00034 | 1 |
| chr19q12                                | -0,11  | 0,003 | 0,00746 | 1 |
| MORF_FBL                                | -0,11  | 0,003 | 0,04716 | 1 |
| DYSTROPHIN_ASSOCIATED_GLYCOPROTEIN_C    | -0,11  | 0,003 | 0,00013 | 1 |
| SIRNA EIF4GI_DN                         | -0,11  | 0,003 | 0,08223 | 1 |
| SASSON_RESPONSE_TO_FORSKOLIN_UP         | -0,11  | 0,003 | 0,01738 | 1 |
| ZWANG_CLASS_3_TRANSIENTLY_INDUCED_B     | -0,11  | 0,003 | 0,00132 | 1 |
| PODAR_RESPONSE_TO_ADAPHOSTIN_DN         | -0,11  | 0,003 | 0,26102 | 1 |
| V\$GATA4_Q3                             | -0,11  | 0,003 | 0,00042 | 1 |
| V\$NFE2_01                              | -0,11  | 0,003 | 0,00076 | 1 |

|                                                            |        |       |         |   |
|------------------------------------------------------------|--------|-------|---------|---|
| REACTOME_FGFR4_LIGAND_BINDING_AND_ACTIVATION_OF_TBK1_DF_UP | -0,11  | 0,003 | 0,00025 | 1 |
| TBK1_DF_UP                                                 | -0,11  | 0,003 | 0,00847 | 1 |
| GSE39820_TGFBETA3_IL6_VS_TGFBETA3_IL12B_TARGETS            | -0,11  | 0,003 | 0,00158 | 1 |
| ABDELMOHSEN_ELAVL4_TARGETS                                 | -0,11  | 0,003 | 0,00434 | 1 |
| REACTOME_PHOSPHORYLATION_OF_THE_APCCOMPLEX                 | -0,11  | 0,003 | 0,00778 | 1 |
| GCM_PFN1                                                   | -0,11  | 0,003 | 0,01617 | 1 |
| GSE17721_POLYIC_VS_GARDIQUIMOD_12H_EFFECT                  | -0,11  | 0,003 | 0,00118 | 1 |
| GSE17721_CTRL_VS_LPS_8H_BMDM_DN                            | -0,11  | 0,003 | 0,00021 | 1 |
| KEGG_OLFACTORY_TRANSDUCTION                                | -0,11  | 0,003 | 0,00588 | 1 |
| BIOCARTA_BIOPEPTIDES_PATHWAY                               | -0,11  | 0,003 | 0,00029 | 1 |
| GSE29618_PDC_VS_MDC_DAY7_FLU_VACCINATION                   | -0,11  | 0,003 | 0,00084 | 1 |
| CHIARETTI_T_ALL_REFRACTORY_TO_THERAPY                      | -0,11  | 0,003 | 0,00571 | 1 |
| DAZARD_RESPONSE_TO_UV_NHEK_UP                              | -0,11  | 0,003 | 0,0069  | 1 |
| GSE360_T_GONDII_VS_B_MALAYI_LOW_DOS                        | -0,11  | 0,003 | 0,00496 | 1 |
| GSE17721_LPS_VS_CPG_16H_BMDM_DN                            | -0,11  | 0,003 | 0,00081 | 1 |
| LU_EZH2_TARGETS_DN                                         | -0,11  | 0,003 | 0,00691 | 1 |
| MODULE_14                                                  | -0,11  | 0,003 | 0,00106 | 1 |
| CAHOY_ASTROGLIAL                                           | -0,11  | 0,003 | 0,0004  | 1 |
| GSE29618_PDC_VS_MDC_UP                                     | -0,11  | 0,003 | 0,00064 | 1 |
| GSE39820_CTRL_VS_TGFBETA1_IL6_CD4_T_TARGETS                | -0,11  | 0,003 | 0,00865 | 1 |
| LIU_VMYB_TARGETS_UP                                        | -0,11  | 0,003 | 0,00643 | 1 |
| GSE17721_LPS_VS_PAM3CSK4_24H_BMDM_DN                       | -0,11  | 0,003 | 0,00855 | 1 |
| TAGGTCA,MIR-192,MIR-215                                    | -0,11  | 0,003 | 0,00023 | 1 |
| ZHAN_LATE_DIFFERENTIATION_GENES_DN                         | -0,11  | 0,003 | 0,00089 | 1 |
| REACTOME_NONSENSE_MEDIATED_DECAY_OF_mRNAs                  | -0,11  | 0,003 | 0,00137 | 1 |
| GSE9650_GP33_VS_GP276_LCMV_SPECIFIC_RESPONSE               | -0,11  | 0,003 | 0,0596  | 1 |
| GSE2706_2H_VS_8H_R848_AND_LPS_STIMULATION                  | -0,11  | 0,003 | 0,0289  | 1 |
| MORF_PPP5C                                                 | -0,11  | 0,003 | 0,00374 | 1 |
| GNF2_SMC1L1                                                | -0,11  | 0,003 | 0,04569 | 1 |
| MORF_ATF2                                                  | -0,11  | 0,003 | 0,00025 | 1 |
| TORCHIA_TARGETS_OF_EWSR1_FLI1_FUSION                       | -0,11  | 0,003 | 0,00071 | 1 |
| AAAGGGA,MIR-204,MIR-211                                    | -0,11  | 0,003 | 0,00096 | 1 |
| LEE_AGING_NEOCORTEX_UP                                     | -0,109 | 0,003 | 0,0028  | 1 |
| GSE24142_EARLY_THYMIC_PROGENITOR_VS_TERMINAL               | -0,109 | 0,003 | 0,00155 | 1 |
| JAZAG_TGFB1_SIGNALING_VIA_SMAD4_DN                         | -0,109 | 0,003 | 0,00168 | 1 |
| HINATA_NFKB_TARGETS_KERATINOCYTE_UP                        | -0,109 | 0,003 | 0,04262 | 1 |
| ROVERSI_GLIOMA_COPY_NUMBER_DN                              | -0,109 | 0,003 | 0,00046 | 1 |
| GSE17721_0.5H_VS_24H_LPS_BMDM_DN                           | -0,109 | 0,003 | 0,00204 | 1 |
| LIPOPROTEIN_BIOSYNTHETIC_PROCESS                           | 0,109  | 0,003 | 0,04533 | 1 |
| DELASERNA_MYOD_TARGETS_DN                                  | -0,109 | 0,003 | 0,00308 | 1 |
| PID_BARD1PATHWAY                                           | -0,109 | 0,003 | 0,03188 | 1 |
| DORN_ADENOVIRUS_INFECTION_24HR_DN                          | -0,109 | 0,003 | 0,00043 | 1 |

|                                       |        |       |         |   |
|---------------------------------------|--------|-------|---------|---|
| REACTOME_EARLY_PHASE_OF_HIV_LIFE_CYC  | -0,109 | 0,003 | 0,01793 | 1 |
| MODULE_411                            | -0,109 | 0,003 | 0,02944 | 1 |
| GAZDA_DIAMOND_BLACKFAN_ANEMIA_PROG    | -0,109 | 0,003 | 0,02293 | 1 |
| REACTOME_LIGAND_GATED_ION_CHANNEL_T   | -0,109 | 0,003 | 0,01728 | 1 |
| RICKMAN_TUMOR_DIFFERENTIATED_MODERA1  | -0,109 | 0,003 | 0,00369 | 1 |
| TGCAAAC,MIR-452                       | -0,109 | 0,003 | 0,00058 | 1 |
| ACATTCC,MIR-1,MIR-206                 | -0,109 | 0,003 | 0,00099 | 1 |
| LIN_NPAS4_TARGETS_UP                  | -0,109 | 0,003 | 0,00743 | 1 |
| GSE13229_IMM_VS_MATURE_NKCELL_UP      | -0,109 | 0,003 | 0,00014 | 1 |
| BOYALT_LIVER_CANCER_SUBCLASS_G2       | -0,109 | 0,003 | 0,0144  | 1 |
| BAELDE_DIABETIC_NEPHROPATHY_DN        | -0,109 | 0,003 | 0,00146 | 1 |
| GSE17721_CTRL_VS_PAM3CSK4_8H_BMDM_    | -0,109 | 0,003 | 0,00302 | 1 |
| GSE17721_CTRL_VS_POLYIC_2H_BMDM_UP    | -0,109 | 0,003 | 0,00176 | 1 |
| MORF_MSH2                             | -0,109 | 0,003 | 0,14323 | 1 |
| RNA_3END_PROCESSING                   | -0,109 | 0,003 | 0,10751 | 1 |
| REACTOME_NITRIC_OXIDE_STIMULATES_GUAN | -0,109 | 0,003 | 0,00014 | 1 |
| ZHANG_RESPONSE_TO_CANTHARIDIN_DN      | -0,109 | 0,003 | 0,0078  | 1 |
| NEBEN_AML_WITH_FLT3_OR_NRAS_UP        | 0,109  | 0,003 | 0,42563 | 1 |
| MARSHALL_VIRAL_INFECTION_RESPONSE_UP  | -0,109 | 0,003 | 0,09302 | 1 |
| REACTOME_GPCR_LIGAND_BINDING          | -0,109 | 0,003 | 0,00059 | 1 |
| BIOCARTA_MCM_PATHWAY                  | -0,109 | 0,003 | 0,01478 | 1 |
| GSE17974_IL4_AND_ANTI_IL12_VS_UNTREA  | -0,109 | 0,003 | 0,00128 | 1 |
| XU_CREBBP_TARGETS_DN                  | -0,109 | 0,003 | 0,00099 | 1 |
| SULFURIC_ESTER_HYDROLASE_ACTIVITY     | -0,109 | 0,003 | 0,0041  | 1 |
| GSE17974_CTRL_VS_ACT_IL4_AND_ANTI_IL  | -0,109 | 0,003 | 0,09364 | 1 |
| GSE24142_DN2_VS_DN3_THYMOCYTE_FETA    | -0,109 | 0,003 | 0,00357 | 1 |
| OXFORD_RALA_AND_RALB_TARGETS_UP       | -0,109 | 0,003 | 0,28007 | 1 |
| GSE29618_PRE_VS_DAY7_POST_TIV_FLU_V   | -0,109 | 0,003 | 0,00058 | 1 |
| OXIDOREDUCTASE_ACTIVITY_ACTING_ON_SU  | 0,109  | 0,003 | 0,00978 | 1 |
| GSE10325_LUPUS_CD4_TCELL_VS_LUPUS_M   | -0,109 | 0,003 | 0,00016 | 1 |
| MODULE_289                            | -0,109 | 0,003 | 0,00112 | 1 |
| REACTOME_S_PHASE                      | -0,109 | 0,003 | 0,04802 | 1 |
| TTTTGAG,MIR-373                       | -0,109 | 0,003 | 0,00314 | 1 |
| FERRANDO_T_ALL_WITH_MLL_ENL_FUSION_I  | -0,109 | 0,003 | 0,01161 | 1 |
| GSE7460_CTRL_VS_TGFB_TREATED_ACT_TC   | -0,109 | 0,003 | 0,00158 | 1 |
| GSE17721_12H_VS_24H_POLYIC_BMDM_DN    | -0,109 | 0,003 | 0,00108 | 1 |
| MORF_TPT1                             | -0,109 | 0,003 | 0,00173 | 1 |
| RICKMAN_TUMOR_DIFFERENTIATED_WELL_VS  | -0,109 | 0,003 | 0,06373 | 1 |
| AACTGAC,MIR-223                       | -0,109 | 0,003 | 0,00082 | 1 |
| chr12p12                              | -0,109 | 0,003 | 0,00443 | 1 |
| GNF2_MSH6                             | -0,109 | 0,003 | 0,06243 | 1 |
| AMINE_RECEPTOR_ACTIVITY               | -0,109 | 0,003 | 0,00022 | 1 |

|                                       |        |       |         |   |
|---------------------------------------|--------|-------|---------|---|
| GSE14308_TH17_VS_NATURAL_TREG_UP      | -0,109 | 0,003 | 0,00929 | 1 |
| CYCLIC_NUCLEOTIDE_METABOLIC_PROCESS   | -0,109 | 0,003 | 0,00277 | 1 |
| GSE7852_THYMUS_VS_FAT_TCONV_DN        | -0,109 | 0,003 | 0,00219 | 1 |
| LI_INDUCED_T_TO_NATURAL_KILLER_DN     | -0,108 | 0,003 | 0,00039 | 1 |
| DER_IFN_GAMMA_RESPONSE_DN             | -0,108 | 0,003 | 0,05277 | 1 |
| chr4p12                               | -0,108 | 0,003 | 0,02924 | 1 |
| NEGATIVE_REGULATION_OF_DNA_METABOLIC  | -0,108 | 0,003 | 0,04136 | 1 |
| GSE17721_LPS_VS_PAM3CSK4_8H_BMDM_L    | -0,108 | 0,003 | 0,0122  | 1 |
| REACTOME_NRAGE_SIGNALS_DEATH_THROU    | -0,108 | 0,003 | 0,00035 | 1 |
| BROWNE_HCMV_INFECTION_30MIN_DN        | -0,108 | 0,003 | 0,00155 | 1 |
| MAINTENANCE_OF_CELLULAR_PROTEIN_LOC/  | -0,108 | 0,003 | 0,05884 | 1 |
| KALMA_E2F1_TARGETS                    | -0,108 | 0,003 | 0,01894 | 1 |
| GSE17721_POLYIC_VS_GARDIQUIMOD_16H_I  | -0,108 | 0,003 | 0,03726 | 1 |
| GSE13306_RA_VS_UNTREATED_MEM_CD4_T    | -0,108 | 0,003 | 0,02152 | 1 |
| HOLLEMAN_DAUNORUBICIN_ALL_UP          | -0,108 | 0,003 | 0,05091 | 1 |
| GNF2_CDH11                            | -0,108 | 0,003 | 0,00281 | 1 |
| ROZANOV_MMP14_TARGETS_SUBSET          | -0,108 | 0,003 | 0,0084  | 1 |
| KEGG_NOTCH_SIGNALING_PATHWAY          | -0,108 | 0,003 | 0,00021 | 1 |
| ATP_BINDING                           | -0,108 | 0,003 | 0,00074 | 1 |
| BREDEMEYER_RAG_SIGNALING_NOT_VIA_ATM  | -0,108 | 0,003 | 0,00242 | 1 |
| MODULE_248                            | -0,108 | 0,003 | 0,00072 | 1 |
| COFACTOR_TRANSPORTER_ACTIVITY         | 0,108  | 0,003 | 0,15723 | 1 |
| CELL_PROJECTION_BIOGENESIS            | -0,108 | 0,003 | 0,00089 | 1 |
| MORF_FEN1                             | -0,108 | 0,003 | 0,04538 | 1 |
| MEL18_DN.V1_UP                        | -0,108 | 0,003 | 0,01091 | 1 |
| GSE24634_NAIVE_CD4_TCELL_VS_DAY7_IL4  | -0,108 | 0,003 | 0,03447 | 1 |
| GSE15930_NAIVE_VS_24H_IN_VITRO_STIM_  | -0,108 | 0,003 | 0,06711 | 1 |
| REACTOME_SYNTHESIS_OF_GLYCOSYLPHOSPH  | 0,108  | 0,003 | 0,056   | 1 |
| BIOCARTA_NKCELLS_PATHWAY              | -0,108 | 0,003 | 0,00647 | 1 |
| TGTATGA,MIR-485-3P                    | -0,108 | 0,003 | 0,0005  | 1 |
| GSE17721_PAM3CSK4_VS_CPG_4H_BMDM_L    | -0,108 | 0,003 | 0,00339 | 1 |
| chr5q32                               | -0,108 | 0,003 | 0,00384 | 1 |
| BRCA1_DN.V1_UP                        | -0,108 | 0,003 | 0,00061 | 1 |
| PHOSPHORIC_DIESTER_HYDROLASE_ACTIVITY | -0,108 | 0,003 | 0,00482 | 1 |
| GSE24634_NAIVE_CD4_TCELL_VS_DAY3_IL4  | -0,108 | 0,003 | 0,07004 | 1 |
| GSE3982_MAST_CELL_VS_NKCELL_UP        | -0,108 | 0,003 | 0,00731 | 1 |
| REACTOME_PERK_REGULATED_GENE_EXPRES:  | -0,108 | 0,003 | 0,08568 | 1 |
| DARWICHE_PAPILLOMA_RISK_HIGH_DN       | -0,108 | 0,003 | 0,00032 | 1 |
| GSE9988_LOW_LPS_VS_VEHICLE_TREATED_   | -0,108 | 0,003 | 0,01403 | 1 |
| GSE32423_CTRL_VS_IL7_MEMORY_CD8_TCE   | -0,108 | 0,003 | 0,00192 | 1 |
| BIDUS_METASTASIS_UP                   | -0,108 | 0,003 | 0,06473 | 1 |
| OKUMURA_INFLAMMATORY_RESPONSE_LPS     | -0,108 | 0,003 | 0,00202 | 1 |

|                                           |        |       |         |   |
|-------------------------------------------|--------|-------|---------|---|
| MCGOWAN_RSP6_TARGETS_UP                   | -0,108 | 0,003 | 0,00099 | 1 |
| GAVIN_FOXP3_TARGETS_CLUSTER_P2            | -0,108 | 0,003 | 0,00226 | 1 |
| GSE17721_CTRL_VS_LPS_6H_BMDM_DN           | -0,108 | 0,003 | 0,00324 | 1 |
| DAZARD_UV_RESPONSE_CLUSTER_G3             | -0,108 | 0,003 | 0,04523 | 1 |
| GSE16522_ANTI_CD3CD28_STIM_VS_UNSTIM      | -0,108 | 0,003 | 0,00015 | 1 |
| BRUECKNER_TARGETS_OF_MIRLET7A3_UP         | -0,108 | 0,003 | 0,04899 | 1 |
| GSE3982_BCELL_VS_EFF_MEMORY_CD4_TCE       | -0,108 | 0,003 | 0,00045 | 1 |
| OZANNE_AP1_TARGETS_UP                     | -0,108 | 0,003 | 0,04655 | 1 |
| GSE17721_PAM3CSK4_VS_CPG_24H_BMDM_chr3q11 | -0,108 | 0,003 | 0,00292 | 1 |
| TRANSCRIPTION_FACTOR_TFIID_COMPLEX        | -0,108 | 0,003 | 0,01862 | 1 |
| KUMAR_AUTOPHAGY_NETWORK                   | -0,108 | 0,003 | 0,04994 | 1 |
| DAVICIONI_TARGETS_OF_PAX_FOXO1_FUSION     | -0,108 | 0,003 | 0,00464 | 1 |
| PHOSPHATASE_INHIBITOR_ACTIVITY            | -0,108 | 0,003 | 0,00018 | 1 |
| NIKOLSKY_OVERCONNECTED_IN_BREAST_CAI      | -0,108 | 0,003 | 0,00275 | 1 |
| chr11q11                                  | -0,108 | 0,003 | 0,00079 | 1 |
| KRIEG_HYPOXIA_VIA_KDM3A                   | -0,108 | 0,003 | 0,00048 | 1 |
| TRANSFERASE_ACTIVITY_TRANSFERRING_SUL     | -0,108 | 0,003 | 0,05841 | 1 |
| TONG_INTERACT_WITH_PTTG1                  | -0,108 | 0,003 | 0,00984 | 1 |
| GTTTGT,MIR-495                            | -0,108 | 0,003 | 0,00299 | 1 |
| IWANAGA_CARCINOGENESIS_BY_KRAS_UP         | -0,108 | 0,003 | 0,00329 | 1 |
| REACTOME_TRANSLATION                      | -0,107 | 0,003 | 0,00822 | 1 |
| GSE11864_CSF1_IFNG_VS_CSF1_IFNG_PAM3      | -0,107 | 0,003 | 0,00469 | 1 |
| POSITIVE_REGULATION_OF_PEPTIDYL_TYROSI    | -0,107 | 0,003 | 0,01498 | 1 |
| GSE2826_WT_VS_XID_BCELL_UP                | -0,107 | 0,003 | 0,0003  | 1 |
| HEIDENBLAD_AMPLICON_8Q24_UP               | -0,107 | 0,003 | 0,01143 | 1 |
| LEE_LIVER_CANCER_MYC_DN                   | -0,107 | 0,003 | 0,0396  | 1 |
| MODULE_178                                | -0,107 | 0,003 | 0,00206 | 1 |
| GGARNTKYCCA_UNKNOWN                       | -0,107 | 0,003 | 0,00122 | 1 |
| ONKEN_UVEAL_MELANOMA_DN                   | -0,107 | 0,003 | 0,00056 | 1 |
| CHESLER_BRAIN_HIGHEST_GENETIC_VARIANC     | -0,107 | 0,003 | 0,00014 | 1 |
| GSE17721_POLYIC_VS_GARDIQUIMOD_4H_BM      | -0,107 | 0,003 | 0,00381 | 1 |
| V\$AML1_Q1                                | -0,107 | 0,003 | 0,00305 | 1 |
| V\$AML1_Q6                                | -0,107 | 0,003 | 0,00024 | 1 |
| V\$COREBINDINGFACTOR_Q6                   | -0,107 | 0,003 | 0,00024 | 1 |
| chr11q21                                  | -0,107 | 0,003 | 0,00031 | 1 |
| GSE360_L_MAJOR_VS_B_MALAYI_LOW_DOS        | -0,107 | 0,003 | 0,18196 | 1 |
| BIOCARTA_CHREBP2_PATHWAY                  | -0,107 | 0,003 | 0,00047 | 1 |
| GINESTIER_BREAST_CANCER_ZNF217_AMPLIF     | -0,107 | 0,003 | 0,01385 | 1 |
| GSE12366_PLASMA_CELL_VS_NAIVE_BCELL       | -0,107 | 0,003 | 0,00105 | 1 |
| PID_NECTIN_PATHWAY                        | -0,107 | 0,003 | 0,00034 | 1 |
| SENESE_HDAC1_TARGETS_UP                   | -0,107 | 0,003 | 0,04172 | 1 |
|                                           | -0,107 | 0,003 | 0,05675 | 1 |

|                                        |        |       |         |   |
|----------------------------------------|--------|-------|---------|---|
| HEDVAT_ELF4_TARGETS_UP                 | -0,107 | 0,003 | 0,0033  | 1 |
| ADENYL_RIBONUCLEOTIDE_BINDING          | -0,107 | 0,003 | 0,00093 | 1 |
| NIELSEN_LEIOMYOSARCOMA_DN              | -0,107 | 0,003 | 0,00246 | 1 |
| KEGG_SPLICEOSOME                       | -0,107 | 0,003 | 0,02568 | 1 |
| REACTOME_UNWINDING_OF_DNA              | -0,107 | 0,003 | 0,03856 | 1 |
| REACTOME_G1_S_TRANSITION               | -0,107 | 0,003 | 0,05594 | 1 |
| REACTOME_CLASS_A1_RHODOPSIN_LIKE_REC   | -0,107 | 0,003 | 0,0008  | 1 |
| DELPUECH_FOXO3_TARGETS_UP              | -0,107 | 0,003 | 0,00612 | 1 |
| V\$STAT3_02                            | -0,107 | 0,003 | 0,00015 | 1 |
| KEGG_UBIQUITIN_MEDIATED_PROTEOLYSIS    | -0,107 | 0,003 | 0,02187 | 1 |
| PLASARI_TGFB1_SIGNALING_VIA_NFIC_1HR_I | -0,107 | 0,003 | 0,00641 | 1 |
| RB_DN.V1_DN                            | -0,107 | 0,003 | 0,00046 | 1 |
| KAAB_HEART_ATRIUM_VS_VENTRICLE_DN      | -0,107 | 0,003 | 0,00049 | 1 |
| GSE27786_LIN_NEG_VS_ERYTHROBLAST_UP    | -0,107 | 0,003 | 0,00262 | 1 |
| GSE36476_CTRL_VS_TSST_ACT_16H_MEMO     | -0,107 | 0,003 | 0,09234 | 1 |
| GSE1460_INTRATHYMIC_T_PROGENITOR_VS_   | -0,107 | 0,004 | 0,0022  | 1 |
| GSE20715_OH_VS_24H_OZONE_TLR4_KO_L     | -0,107 | 0,004 | 0,00047 | 1 |
| chr20p12                               | -0,107 | 0,004 | 0,03625 | 1 |
| EUKARYOTIC_TRANSLATION_INITIATION_FAC  | -0,107 | 0,004 | 0,15042 | 1 |
| KAUFFMANN_MELANOMA_RELAPSE_UP          | -0,107 | 0,004 | 0,02033 | 1 |
| CAFFAREL_RESPONSE_TO_THC_24HR_5_DN     | -0,107 | 0,004 | 0,08103 | 1 |
| AMIT_EGF_RESPONSE_480_MCF10A           | -0,107 | 0,004 | 0,04292 | 1 |
| GCTTGAA,MIR-498                        | -0,107 | 0,004 | 0,00187 | 1 |
| GSE9006_HEALTHY_VS_TYPE_1_DIABETES_I   | -0,107 | 0,004 | 0,01823 | 1 |
| GSE1460_CD4_THYMOCYTE_VS_THYMIC_STF    | -0,107 | 0,004 | 0,00019 | 1 |
| UDAYAKUMAR_MED1_TARGETS_UP             | -0,107 | 0,004 | 0,18175 | 1 |
| OSWALD_HEMATOPOIETIC_STEM_CELL_IN_CC   | -0,107 | 0,004 | 0,00187 | 1 |
| HUPER_BREAST_BASAL_VS_LUMINAL_DN       | -0,107 | 0,004 | 0,00961 | 1 |
| INTEGRATOR_COMPLEX                     | -0,107 | 0,004 | 0,00904 | 1 |
| GSE17974_IL4_AND_ANTI_IL12_VS_UNTREA   | -0,107 | 0,004 | 0,00045 | 1 |
| MODULE_342                             | -0,107 | 0,004 | 0,00014 | 1 |
| ATGAAGG,MIR-205                        | -0,107 | 0,004 | 0,00198 | 1 |
| GSE17721_POLYIC_VS_PAM3CSK4_6H_BMDI    | -0,107 | 0,004 | 0,05904 | 1 |
| JAIN_NFKB_SIGNALING                    | -0,107 | 0,004 | 0,1229  | 1 |
| BIOCARTA_IL22BP_PATHWAY                | -0,107 | 0,004 | 0,00504 | 1 |
| GSE17721_CTRL_VS_PAM3CSK4_2H_BMDM_     | -0,107 | 0,004 | 0,00164 | 1 |
| MODULE_280                             | -0,107 | 0,004 | 0,01425 | 1 |
| GSE17721_PAM3CSK4_VS_CPG_16H_BMDM_     | -0,107 | 0,004 | 0,00119 | 1 |
| GSE17974_CTRL_VS_ACT_IL4_AND_ANTI_IL   | -0,107 | 0,004 | 0,03503 | 1 |
| PEREZ_TP63_TARGETS                     | -0,107 | 0,004 | 0,00039 | 1 |
| REACTOME_G_PROTEIN_ACTIVATION          | -0,106 | 0,004 | 0,00619 | 1 |
| V\$CEBP_Q2_01                          | -0,106 | 0,004 | 0,0005  | 1 |



|                                       |        |       |         |   |
|---------------------------------------|--------|-------|---------|---|
| GSE15930_NAIVE_VS_72H_IN_VITRO_STIM_  | -0,106 | 0,004 | 0,05986 | 1 |
| MOREAUX_MULTIPLE_MYELOMA_BY_TACI_DN   | -0,106 | 0,004 | 0,08072 | 1 |
| GSE15930_NAIVE_VS_48H_IN_VITRO_STIM_  | -0,106 | 0,004 | 0,1038  | 1 |
| ANTI_APOPTOSIS                        | -0,106 | 0,004 | 0,01516 | 1 |
| ACTGTAG,MIR-139                       | -0,106 | 0,004 | 0,00091 | 1 |
| BIOCARTA_BARRESTIN_PATHWAY            | -0,106 | 0,004 | 0,00199 | 1 |
| GSE7460_CTRL_VS_TGFB_TREATED_ACT_FC   | -0,106 | 0,004 | 0,02794 | 1 |
| MODULE_117                            | -0,106 | 0,004 | 0,00027 | 1 |
| MODULE_414                            | -0,106 | 0,004 | 0,00776 | 1 |
| REACTOME_MRNA_DECAY_BY_3_TO_5_EXOR    | -0,106 | 0,004 | 0,04122 | 1 |
| GSE9650_EFFECTOR_VS_EXHAUSTED_CD8_T   | -0,106 | 0,004 | 0,00855 | 1 |
| MODULE_238                            | -0,106 | 0,004 | 0,0012  | 1 |
| POSITIVE_REGULATION_OF_PHOSPHORYLATIC | -0,106 | 0,004 | 0,00022 | 1 |
| GSE11864_CSF1_VS_CSF1_IFNG_IN_MAC_DI  | -0,106 | 0,004 | 0,02313 | 1 |
| LIEN_BREAST_CARCINOMA_METAPLASTIC_VS  | 0,106  | 0,004 | 0,27574 | 1 |
| GSE9006_1MONTH_VS_4MONTH_POST_TYPE    | -0,106 | 0,004 | 0,00999 | 1 |
| REACTOME_3_UTR_MEDIATED_TRANSLATION   | -0,106 | 0,004 | 0,00263 | 1 |
| GSE360_HIGH_DOSE_B_MALAYI_VS_M_TUBE   | -0,106 | 0,004 | 0,00986 | 1 |
| DACOSTA_ERCC3_ALLELE_XPCS_VS_TTD_DN   | -0,106 | 0,004 | 0,0011  | 1 |
| GAUSSMANN_MLL_AF4_FUSION_TARGETS_F_   | -0,106 | 0,004 | 0,00014 | 1 |
| MORF_PTPRR                            | -0,106 | 0,004 | 0,00386 | 1 |
| GSE39820_TGFBETA1_VS_TGFBETA3_IN_IL6  | -0,106 | 0,004 | 0,00316 | 1 |
| MODULE_203                            | -0,106 | 0,004 | 0,10105 | 1 |
| MODULE_254                            | -0,106 | 0,004 | 0,0494  | 1 |
| RNA_CATABOLIC_PROCESS                 | -0,106 | 0,004 | 0,07697 | 1 |
| GSE17721_0.5H_VS_8H_GARDIQUIMOD_BMD   | -0,106 | 0,004 | 0,00976 | 1 |
| chr1q22                               | -0,106 | 0,004 | 0,0032  | 1 |
| GSE360_DC_VS_MAC_M_TUBERCULOSIS_DN    | -0,106 | 0,004 | 0,01356 | 1 |
| GSE15750_WT_VS_TRAF6KO_DAY10_EFF_C    | -0,106 | 0,004 | 0,02056 | 1 |
| GSE9988_LOW_LPS_VS_CTRL_TREATED_MO    | -0,106 | 0,004 | 0,01241 | 1 |
| LIU_TARGETS_OF_VMYB_VS_CMYB_DN        | -0,106 | 0,004 | 0,0003  | 1 |
| PHOSPHOLIPASE_C_ACTIVITY              | -0,106 | 0,004 | 0,08406 | 1 |
| TSUDA_ALVEOLAR_SOFT_PART_SARCOMA      | -0,106 | 0,004 | 0,01363 | 1 |
| HASLINGER_B_CLL_WITH_MUTATED_VH_GEN   | -0,106 | 0,004 | 0,00115 | 1 |
| GSE29618_PRE_VS_DAY7_FLU_VACCINE_PD   | -0,106 | 0,004 | 0,02938 | 1 |
| V\$MAF_Q6                             | -0,106 | 0,004 | 0,00023 | 1 |
| V\$IRF7_01                            | -0,106 | 0,004 | 0,00138 | 1 |
| MODULE_286                            | -0,106 | 0,004 | 0,00279 | 1 |
| MATTHEWS_SKIN_CARCINOGENESIS_VIA_JUN  | -0,106 | 0,004 | 0,00668 | 1 |
| EHRlich_ICF_SYNDROM_DN                | -0,106 | 0,004 | 0,00151 | 1 |
| PLASARI_TGFB1_TARGETS_10HR_DN         | -0,106 | 0,004 | 0,00021 | 1 |
| CELL_FRACTION                         | -0,106 | 0,004 | 0,00321 | 1 |

|                                       |        |       |         |   |
|---------------------------------------|--------|-------|---------|---|
| REACTOME_CELL_DEATH_SIGNALLING_VIA_N  | -0,106 | 0,004 | 0,00023 | 1 |
| BIOCARTA_PTC1_PATHWAY                 | -0,106 | 0,004 | 0,01817 | 1 |
| KERLEY_RESPONSE_TO_CISPLATIN_DN       | -0,106 | 0,004 | 0,00309 | 1 |
| REACTOME_TRIGLYCERIDE_BIOSYNTHESIS    | -0,106 | 0,004 | 0,00127 | 1 |
| MORF_MDM2                             | -0,106 | 0,004 | 0,00072 | 1 |
| TRANSITION_METAL_ION_TRANSPORT        | 0,106  | 0,004 | 0,08482 | 1 |
| GSE27786_CD4_TCELL_VS_MONO_MAC_UP     | -0,106 | 0,004 | 0,01657 | 1 |
| MYLLYKANGAS_AMPLIFICATION_HOT_SPOT_1  | -0,106 | 0,004 | 0,00233 | 1 |
| MODULE_21                             | -0,106 | 0,004 | 0,10814 | 1 |
| BANDRES_RESPONSE_TO_CARMUSTIN_MGMT.   | -0,106 | 0,004 | 0,00074 | 1 |
| REACTOME_HEMOSTASIS                   | -0,106 | 0,004 | 0,00107 | 1 |
| BIOCARTA_ATM_PATHWAY                  | -0,106 | 0,004 | 0,0023  | 1 |
| PROTEOGLYCAN_BIOSYNTHETIC_PROCESS     | -0,106 | 0,004 | 0,00079 | 1 |
| NIELSEN_GIST_VS_SYNOVIAL_SARCOMA_DN   | -0,106 | 0,004 | 0,00153 | 1 |
| V\$HSF2_01                            | -0,106 | 0,004 | 0,00034 | 1 |
| MYLLYKANGAS_AMPLIFICATION_HOT_SPOT_2  | -0,106 | 0,004 | 0,00781 | 1 |
| POSITIVE_REGULATION_OF_IMMUNE_RESPON  | -0,106 | 0,004 | 0,00441 | 1 |
| GSE29618_PRE_VS_DAY7_POST_TIV_FLU_V   | -0,106 | 0,004 | 0,0003  | 1 |
| G_PROTEIN_COUPLED_RECEPTOR_PROTEIN_S  | -0,106 | 0,004 | 0,00032 | 1 |
| AMIT_EGF_RESPONSE_60_MCF10A           | -0,106 | 0,004 | 0,00021 | 1 |
| V\$IRF1_Q6                            | -0,106 | 0,004 | 0,0013  | 1 |
| KIM_RESPONSE_TO_TSA_AND_DECITABINE_U  | -0,106 | 0,004 | 0,00297 | 1 |
| REACTOME_ACTIVATION_OF_ATR_IN_RESPON  | -0,106 | 0,004 | 0,02982 | 1 |
| PROTEIN_STABILIZATION                 | -0,106 | 0,004 | 0,00031 | 1 |
| MODULE_162                            | -0,105 | 0,004 | 0,08918 | 1 |
| GSE17974_0H_VS_72H_IN_VITRO_ACT_CD4   | -0,105 | 0,004 | 0,05555 | 1 |
| ZHANG_ADIPOGENESIS_BY_BMP7            | -0,105 | 0,004 | 0,00408 | 1 |
| IL2_UP.V1_UP                          | -0,105 | 0,004 | 0,00282 | 1 |
| GSE32423_IL7_VS_IL7_IL4_MEMORY_CD8_T  | -0,105 | 0,004 | 0,00076 | 1 |
| chr9p24                               | -0,105 | 0,004 | 0,00142 | 1 |
| CHNG_MULTIPLE_MYELOMA_HYPERPLOID_UP   | -0,105 | 0,004 | 0,0007  | 1 |
| CHEMELLO_SOLEUS_VS_EDL_MYOFIBERS_UP   | -0,105 | 0,004 | 0,00106 | 1 |
| DAIRKEE_TERT_TARGETS_UP               | -0,105 | 0,004 | 0,00848 | 1 |
| BYSTRYKH_HEMATOPOIESIS_STEM_CELL_IL3F | -0,105 | 0,004 | 0,0033  | 1 |
| MORF_ACTG1                            | -0,105 | 0,004 | 0,00489 | 1 |
| GSE6566_STRONG_VS_WEAK_DC_STIMULAT    | -0,105 | 0,004 | 0,00081 | 1 |
| GSE15930_NAIVE_VS_24H_IN_VITRO_STIM_  | -0,105 | 0,004 | 0,07677 | 1 |
| GSE37416_CTRL_VS_48H_F_TULARENSIS_L   | -0,105 | 0,004 | 0,00069 | 1 |
| SWEET_KRAS_TARGETS_UP                 | -0,105 | 0,004 | 0,00046 | 1 |
| SERVITJA_ISLET_HNF1A_TARGETS_UP       | -0,105 | 0,004 | 0,0005  | 1 |
| ACTACCT,MIR-196A,MIR-196B             | -0,105 | 0,004 | 0,00042 | 1 |
| CEBALLOS_TARGETS_OF_TP53_AND_MYC_UI   | -0,105 | 0,004 | 0,00042 | 1 |

|                                      |        |       |         |   |
|--------------------------------------|--------|-------|---------|---|
| PHOSPHORIC_ESTER_HYDROLASE_ACTIVITY  | -0,105 | 0,004 | 0,0007  | 1 |
| MAHADEVAN_RESPONSE_TO_MP470_UP       | -0,105 | 0,004 | 0,14214 | 1 |
| GSE9988_ANTI_TREM1_AND_LPS_VS_VEHIC  | -0,105 | 0,004 | 0,04834 | 1 |
| SPINDLE_MICROTUBULE                  | -0,105 | 0,004 | 0,02632 | 1 |
| EXTRACELLULAR_SPACE                  | -0,105 | 0,004 | 0,0027  | 1 |
| KUMAR_TARGETS_OF_MLL_AF9_FUSION      | -0,105 | 0,004 | 0,0022  | 1 |
| WU_HBX_TARGETS_1_UP                  | -0,105 | 0,004 | 0,11573 | 1 |
| MODULE_500                           | -0,105 | 0,004 | 0,02753 | 1 |
| GERY_CEBP_TARGETS                    | -0,105 | 0,004 | 0,00455 | 1 |
| JIANG_TIP30_TARGETS_DN               | -0,105 | 0,004 | 0,02771 | 1 |
| GSE30083_SP1_VS_SP3_THYMOCYTE_UP     | -0,105 | 0,004 | 0,00232 | 1 |
| GRAHAM_CML_DIVIDING_VS_NORMAL_QUIES  | -0,105 | 0,004 | 0,00263 | 1 |
| chr7p15                              | -0,105 | 0,004 | 0,00588 | 1 |
| IL15_UP.V1_UP                        | -0,105 | 0,004 | 0,00327 | 1 |
| MARKS_HDAC_TARGETS_UP                | -0,105 | 0,004 | 0,01948 | 1 |
| MEISSNER_BRAIN_HCP_WITH_H3_UNMETHYL  | -0,105 | 0,004 | 0,03108 | 1 |
| GSE360_CTRL_VS_B_MALAYI_LOW_DOSE_M   | -0,105 | 0,004 | 0,00804 | 1 |
| V\$CEBP_01                           | -0,105 | 0,004 | 0,00022 | 1 |
| BIOCARTA_CACAM_PATHWAY               | -0,105 | 0,004 | 0,0008  | 1 |
| MODULE_287                           | -0,105 | 0,004 | 0,00058 | 1 |
| GSE7460_CD8_TCELL_VS_CD4_TCELL_ACT   | -0,105 | 0,004 | 0,00315 | 1 |
| DARWICHE_SQUAMOUS_CELL_CARCINOMA_UI  | -0,105 | 0,004 | 0,03079 | 1 |
| GSE17721_PAM3CSK4_VS_GADIQUIMOD_16H  | -0,105 | 0,004 | 0,00971 | 1 |
| SWEET_KRAS_TARGETS_DN                | -0,105 | 0,004 | 0,0273  | 1 |
| BROWNE_HCMV_INFECTION_10HR_UP        | -0,105 | 0,004 | 0,00462 | 1 |
| NEUROPEPTIDE_HORMONE_ACTIVITY        | -0,105 | 0,004 | 0,00053 | 1 |
| POSITIVE_REGULATION_OF_PHOSPHATE_MET | -0,105 | 0,004 | 0,00016 | 1 |
| FLECHNER_PBL_KIDNEY_TRANSPLANT_OK_V  | -0,105 | 0,004 | 0,07809 | 1 |
| SEITZ_NEOPLASTIC_TRANSFORMATION_BY_8 | -0,105 | 0,004 | 0,15022 | 1 |
| TAKEDA_TARGETS_OF_NUP98_HOXA9_FUSIC  | -0,105 | 0,004 | 0,00158 | 1 |
| FIGUEROA_AML_METHYLATION_CLUSTER_1_I | -0,105 | 0,004 | 0,01097 | 1 |
| chr3q24                              | -0,105 | 0,004 | 0,09059 | 1 |
| V\$GATA1_05                          | -0,105 | 0,004 | 0,00074 | 1 |
| REGULATION_OF_IMMUNE_EFFECTOR_PROCES | -0,105 | 0,004 | 0,01025 | 1 |
| MIKKELSEN_ES_LCP_WITH_H3K4ME3_AND_H  | -0,105 | 0,004 | 0,00076 | 1 |
| GSE34205_HEALTHY_VS_RSV_INF_INFANT_F | -0,104 | 0,004 | 0,0002  | 1 |
| REACTOME_NEP_NS2_INTERACTS_WITH_THE  | -0,104 | 0,004 | 0,05991 | 1 |
| ITO_PTTG1_TARGETS_DN                 | -0,104 | 0,004 | 0,07093 | 1 |
| GSE15930_NAIVE_VS_48H_IN_VITRO_STIM  | -0,104 | 0,004 | 0,15745 | 1 |
| BONOME_OVARIAN_CANCER_POOR_SURVIVAL  | -0,104 | 0,004 | 0,01551 | 1 |
| KANG_GIST_WITH_PDGFR_A_UP            | -0,104 | 0,004 | 0,0008  | 1 |
| GSE20151_CTRL_VS_FUSOBACT_NUCLEATU   | -0,104 | 0,004 | 0,00074 | 1 |

|                                       |        |       |         |   |
|---------------------------------------|--------|-------|---------|---|
| TAKEDA_TARGETS_OF_NUP98_HOXA9_FUSIC   | -0,104 | 0,004 | 0,00155 | 1 |
| GSE2197_IMMUNOSUPPRESSIVE_DNA_VS_UN   | -0,104 | 0,004 | 0,00698 | 1 |
| GSE10325_CD4_TCELL_VS_MYELOID_UP      | -0,104 | 0,004 | 0,00042 | 1 |
| REGULATION_OF_CELL_MIGRATION          | -0,104 | 0,004 | 0,00214 | 1 |
| TSAI_RESPONSE_TO_IONIZING_RADIATION   | -0,104 | 0,004 | 0,00303 | 1 |
| DORN_ADENOVIRUS_INFECTION_32HR_UP     | -0,104 | 0,004 | 0,00285 | 1 |
| MATHEW_FANCONI_ANEMIA_GENES           | -0,104 | 0,004 | 0,03552 | 1 |
| CHIANG_LIVER_CANCER_SUBCLASS_INTERFER | -0,104 | 0,004 | 0,0013  | 1 |
| GSE17721_12H_VS_24H_LPS_BMDM_UP       | -0,104 | 0,004 | 0,0042  | 1 |
| SCGGAAGY_V\$ELK1_02                   | -0,104 | 0,004 | 0,0014  | 1 |
| MYLLYKANGAS_AMPLIFICATION_HOT_SPOT_2  | -0,104 | 0,004 | 0,0049  | 1 |
| chr1p22                               | -0,104 | 0,004 | 0,02448 | 1 |
| DNA_DAMAGE_RESPONSESIGNAL_TRANSDUC    | -0,104 | 0,004 | 0,0007  | 1 |
| REACTOME_ACTIVATION_OF_THE_PRE_REPLI  | -0,104 | 0,004 | 0,04591 | 1 |
| MALONEY_RESPONSE_TO_17AAG_DN          | -0,104 | 0,004 | 0,04999 | 1 |
| GSE17721_LPS_VS_POLYIC_24H_BMDM_UP    | -0,104 | 0,004 | 0,11846 | 1 |
| YANAGISAWA_LUNG_CANCER_RECURRENCE     | -0,104 | 0,004 | 0,0773  | 1 |
| GSE19825_NAIVE_VS_IL2RAHIGH_DAY3_EFF  | -0,104 | 0,004 | 0,01051 | 1 |
| V\$NF1_Q6_01                          | -0,104 | 0,004 | 0,00013 | 1 |
| GNF2_ST13                             | -0,104 | 0,004 | 0,00292 | 1 |
| RIZKI_TUMOR_INVASIVENESS_2D_UP        | -0,104 | 0,004 | 0,00153 | 1 |
| NEGATIVE_REGULATION_OF_PHOSPHORYLATI  | -0,104 | 0,004 | 0,01261 | 1 |
| GSE16522_ANTI_CD3CD28_STIM_VS_UNSTIM  | -0,104 | 0,004 | 0,04977 | 1 |
| REGULATION_OF_SIGNAL_TRANSDUCTION     | -0,104 | 0,004 | 0,00013 | 1 |
| GSE39820_CTRL_VS_TGFBETA1_IL6_IL23A_  | -0,104 | 0,004 | 0,00467 | 1 |
| MORF_NOS2A                            | -0,104 | 0,004 | 0,00114 | 1 |
| RIBONUCLEOPROTEIN_COMPLEX             | -0,104 | 0,004 | 0,03321 | 1 |
| TRANSLATION_REGULATOR_ACTIVITY        | -0,104 | 0,004 | 0,12717 | 1 |
| GSE17721_CPG_VS_GARDIQUIMOD_8H_BMDM   | -0,104 | 0,004 | 0,00125 | 1 |
| ELVIDGE_HIF1A_TARGETS_UP              | -0,104 | 0,004 | 0,18179 | 1 |
| MORF_MSH3                             | -0,104 | 0,004 | 0,00073 | 1 |
| LABBE_WNT3A_TARGETS_DN                | -0,104 | 0,004 | 0,00116 | 1 |
| GSE17721_POLYIC_VS_CPG_1H_BMDM_DN     | -0,104 | 0,004 | 0,00014 | 1 |
| GSE22886_NAIVE_CD8_TCELL_VS_DC_UP     | -0,104 | 0,005 | 0,00052 | 1 |
| GSE9988_ANTI_TREM1_AND_LPS_VS_CTRL_   | -0,104 | 0,005 | 0,0131  | 1 |
| BASAL_LAMINA                          | -0,104 | 0,005 | 0,00015 | 1 |
| HUNSBERGER_EXERCISE_REGULATED_GENES   | -0,104 | 0,005 | 0,00515 | 1 |
| MODULE_493                            | -0,104 | 0,005 | 0,0016  | 1 |
| GCM_MAP1B                             | -0,104 | 0,005 | 0,00386 | 1 |
| GSE17721_PAM3CSK4_VS_GADIQUIMOD_4H_   | -0,104 | 0,005 | 0,0009  | 1 |
| V\$AR_Q6                              | -0,104 | 0,005 | 0,00021 | 1 |
| REACTOME_ACTIVATION_OF_THE_MRNA_UPC   | -0,104 | 0,005 | 0,00788 | 1 |

|                                       |        |       |         |   |
|---------------------------------------|--------|-------|---------|---|
| GAUSSMANN_MLL_AF4_FUSION_TARGETS_E    | -0,104 | 0,005 | 0,00103 | 1 |
| GSE17721_CPG_VS_GARDIQUIMOD_6H_BMDM   | -0,104 | 0,005 | 0,04824 | 1 |
| REACTOME_HOST_INTERACTIONS_OF_HIV_FA  | -0,104 | 0,005 | 0,12694 | 1 |
| LEE_LIVER_CANCER_E2F1_UP              | -0,104 | 0,005 | 0,01553 | 1 |
| GSE10239_NAIVE_VS_MEMORY_CD8_TCELL_   | -0,104 | 0,005 | 0,00021 | 1 |
| chr2p22                               | -0,104 | 0,005 | 0,06942 | 1 |
| GSE9006_HEALTHY_VS_TYPE_1_DIABETES_I  | -0,104 | 0,005 | 0,08399 | 1 |
| GSE9006_HEALTHY_VS_TYPE_1_DIABETES_I  | -0,104 | 0,005 | 0,00023 | 1 |
| PID_IL6_7PATHWAY                      | -0,104 | 0,005 | 0,00161 | 1 |
| OZANNE_AP1_TARGETS_DN                 | -0,104 | 0,005 | 0,01343 | 1 |
| GSE360_CTRL_VS_T_GONDII_DC_DN         | -0,104 | 0,005 | 0,00215 | 1 |
| ADENYL_NUCLEOTIDE_BINDING             | -0,104 | 0,005 | 0,00078 | 1 |
| V\$RP58_01                            | -0,104 | 0,005 | 0,00022 | 1 |
| chr17q23                              | -0,104 | 0,005 | 0,00176 | 1 |
| MODULE_15                             | -0,104 | 0,005 | 0,01175 | 1 |
| GSE29618_PRE_VS_DAY7_FLU_VACCINE_MC   | -0,104 | 0,005 | 0,00029 | 1 |
| KEGG_BASAL_CELL_CARCINOMA             | -0,104 | 0,005 | 0,00101 | 1 |
| LABBE_TGFB1_TARGETS_DN                | -0,104 | 0,005 | 0,00071 | 1 |
| DEOXYRIBONUCLEASE_ACTIVITY            | -0,104 | 0,005 | 0,00302 | 1 |
| REACTOME_STRIATED_MUSCLE_CONTRACTIOI  | -0,104 | 0,005 | 0,00115 | 1 |
| GSE3982_EOSINOPHIL_VS_EFF_MEMORY_CD4  | -0,104 | 0,005 | 0,0137  | 1 |
| REPLICATION_FORK                      | -0,103 | 0,005 | 0,04308 | 1 |
| chr1p36                               | -0,103 | 0,005 | 0,00119 | 1 |
| BIOCARTA_TALL1_PATHWAY                | -0,103 | 0,005 | 0,00672 | 1 |
| BIOCARTA_SET_PATHWAY                  | -0,103 | 0,005 | 0,01257 | 1 |
| KEGG_HOMOLOGOUS_RECOMBINATION         | -0,103 | 0,005 | 0,01791 | 1 |
| MODULE_85                             | -0,103 | 0,005 | 0,00052 | 1 |
| NEGATIVE_REGULATION_OF_DNA_REPLICATIC | -0,103 | 0,005 | 0,04111 | 1 |
| GSE9037_WT_VS_IRAK4_KO_LPS_4H_STIM_   | -0,103 | 0,005 | 0,00246 | 1 |
| MORF_RUNX1                            | -0,103 | 0,005 | 0,00033 | 1 |
| DAZARD_UV_RESPONSE_CLUSTER_G2         | -0,103 | 0,005 | 0,01808 | 1 |
| ODONNELL_METASTASIS_DN                | -0,103 | 0,005 | 0,00468 | 1 |
| BEGUM_TARGETS_OF_PAX3_FOXO1_FUSION_   | -0,103 | 0,005 | 0,00099 | 1 |
| BEIER_GLIOMA_STEM_CELL_UP             | -0,103 | 0,005 | 0,00301 | 1 |
| GSE360_DC_VS_MAC_L_MAJOR_UP           | -0,103 | 0,005 | 0,00072 | 1 |
| SHEPARD_CRUSH_AND_BURN_MUTANT_UP      | -0,103 | 0,005 | 0,00086 | 1 |
| BILBAN_B_CLL_LPL_DN                   | -0,103 | 0,005 | 0,00054 | 1 |
| REACTOME_GABA_RECEPTOR_ACTIVATION     | -0,103 | 0,005 | 0,00428 | 1 |
| GLYCOPROTEIN_CATABOLIC_PROCESS        | 0,103  | 0,005 | 0,07653 | 1 |
| TOOKER_GEMCITABINE_RESISTANCE_UP      | -0,103 | 0,005 | 0,00899 | 1 |
| GSE24081_CONTROLLER_VS_PROGRESSOR_F   | -0,103 | 0,005 | 0,00036 | 1 |
| GRAESSMANN_APOPTOSIS_BY_DOXORUBICIN_  | -0,103 | 0,005 | 0,00141 | 1 |

|                                        |        |       |         |   |
|----------------------------------------|--------|-------|---------|---|
| BILBAN_B_CLL_LPL_UP                    | -0,103 | 0,005 | 0,00228 | 1 |
| CHIARADONNA_NEOPLASTIC_TRANSFORMATI    | -0,103 | 0,005 | 0,00028 | 1 |
| RUTELLA_RESPONSE_TO_HGF_VS_CSF2RB_A    | -0,103 | 0,005 | 0,00249 | 1 |
| PURINE_RIBONUCLEOTIDE_BINDING          | -0,103 | 0,005 | 0,00044 | 1 |
| chr10p13                               | -0,103 | 0,005 | 0,1366  | 1 |
| AAGCCAT,MIR-135A,MIR-135B              | -0,103 | 0,005 | 0,00028 | 1 |
| GSE3982_DC_VS_MAC_LPS_STIM_UP          | -0,103 | 0,005 | 0,00087 | 1 |
| V\$CDX2_Q5                             | -0,103 | 0,005 | 0,0002  | 1 |
| GSE14000_TRANSLATED_RNA_VS_MRNA_DC     | -0,103 | 0,005 | 0,08732 | 1 |
| PID_ATR_PATHWAY                        | -0,103 | 0,005 | 0,02264 | 1 |
| SMALL_NUCLEAR_RIBONUCLEOPROTEIN_COMI   | -0,103 | 0,005 | 0,06313 | 1 |
| MOREAUX_B_LYMPHOCYTE_MATURATION_BY     | -0,103 | 0,005 | 0,07449 | 1 |
| MIKKELSEN_DEDIFFERENTIATED_STATE_UP    | -0,103 | 0,005 | 0,00212 | 1 |
| RESPONSE_TO_STRESS                     | -0,103 | 0,005 | 0,00573 | 1 |
| GSE3982_MAST_CELL_VS_NEUTROPHIL_UP     | -0,103 | 0,005 | 0,04181 | 1 |
| chr21q11                               | -0,103 | 0,005 | 0,00914 | 1 |
| MYLLYKANGAS_AMPLIFICATION_HOT_SPOT_1   | 0,103  | 0,005 | 0,00773 | 1 |
| GSE15930_NAIVE_VS_48H_IN_VITRO_STIM    | -0,103 | 0,005 | 0,1671  | 1 |
| AACYNNNTTCCS_UNKNOWN                   | -0,103 | 0,005 | 0,00112 | 1 |
| PRAMOONJAGO_SOX4_TARGETS_DN            | -0,103 | 0,005 | 0,03303 | 1 |
| GSE32423_IL7_VS_IL7_IL4_NAIVE_CD8_TCE  | -0,103 | 0,005 | 0,00013 | 1 |
| CALCIUM_MEDIATED_SIGNALING             | -0,103 | 0,005 | 0,01093 | 1 |
| UDAYAKUMAR_MED1_TARGETS_DN             | -0,103 | 0,005 | 0,00062 | 1 |
| GSE15659_CD45RA_NEG_CD4_TCELL_VS_N     | -0,103 | 0,005 | 0,01019 | 1 |
| GSE1432_1H_VS_6H_IFNG_MICROGLIA_UP     | -0,103 | 0,005 | 0,00025 | 1 |
| POSITIVE_REGULATION_OF_CATALYTIC_ACTI' | -0,103 | 0,005 | 0,00085 | 1 |
| LIGASE_ACTIVITY_FORMING_CARBON_OXYGEI  | -0,103 | 0,005 | 0,38615 | 1 |
| GNF2_TIMP2                             | -0,103 | 0,005 | 0,00145 | 1 |
| MODULE_274                             | -0,103 | 0,005 | 0,00062 | 1 |
| URS_ADIPOCYTE_DIFFERENTIATION_DN       | -0,103 | 0,005 | 0,00254 | 1 |
| MEMBRANE_PART                          | -0,103 | 0,005 | 0,00063 | 1 |
| REACTOME_TRANSPORT_OF_MATURE_MRNA      | -0,103 | 0,005 | 0,06699 | 1 |
| GSE360_L_DONOVANI_VS_B_MALAYI_LOW      | -0,103 | 0,005 | 0,00569 | 1 |
| SUNG_METASTASIS_STROMA_UP              | -0,103 | 0,005 | 0,00488 | 1 |
| WONG_IFNA2_RESISTANCE_UP               | -0,103 | 0,005 | 0,00017 | 1 |
| TGAGATT,MIR-216                        | -0,103 | 0,005 | 0,00044 | 1 |
| MODULE_64                              | -0,103 | 0,005 | 0,00158 | 1 |
| KEGG_CELL_ADHESION_MOLECULES_CAMS      | -0,103 | 0,005 | 0,00345 | 1 |
| GSE17721_0.5H_VS_12H_LPS_BMDM_DN       | -0,103 | 0,005 | 0,00268 | 1 |
| RICKMAN_METASTASIS_DN                  | -0,103 | 0,005 | 0,03257 | 1 |
| PHOSPHOLIPID_TRANSPORTER_ACTIVITY      | -0,103 | 0,005 | 0,01693 | 1 |
| GSE39820_CTRL_VS_IL1B_IL6_CD4_TCELL    | -0,103 | 0,005 | 0,00125 | 1 |

|                                      |        |       |         |   |
|--------------------------------------|--------|-------|---------|---|
| ACTIN_FILAMENT_BUNDLE_FORMATION      | 0,102  | 0,005 | 0,39448 | 1 |
| ION_TRANSMEMBRANE_TRANSPORTER_ACTIV  | -0,102 | 0,005 | 0,00016 | 1 |
| V\$CEBPDELTA_Q6                      | -0,102 | 0,005 | 0,00066 | 1 |
| GSE15659_NONSUPPRESSIVE_TCELL_VS_AC  | -0,102 | 0,005 | 0,00018 | 1 |
| PASQUALUCCI_LYMPHOMA_BY_GC_STAGE_DI  | -0,102 | 0,005 | 0,00181 | 1 |
| GSE24634_NAIVE_CD4_TCELL_VS_DAY10_II | -0,102 | 0,005 | 0,0823  | 1 |
| REACTOME_HS_GAG_BIOSYNTHESIS         | -0,102 | 0,005 | 0,00879 | 1 |
| SCHWAB_TARGETS_OF_BMYB_POLYMORPHIC   | -0,102 | 0,005 | 0,00088 | 1 |
| GAUSSMANN_MLL_AF4_FUSION_TARGETS_F   | -0,102 | 0,005 | 0,06889 | 1 |
| REACTOME_ANTIGEN_ACTIVATES_B_CELL_RE | -0,102 | 0,005 | 0,01972 | 1 |
| GNF2_CBF                             | -0,102 | 0,005 | 0,01602 | 1 |
| MUNSHI_MULTIPLE_MYELOMA_UP           | -0,102 | 0,005 | 0,00261 | 1 |
| MICROTUBULE_ORGANIZING_CENTER_ORGANI | -0,102 | 0,005 | 0,00533 | 1 |
| DNA_DEPENDENT_ATPASE_ACTIVITY        | -0,102 | 0,005 | 0,02221 | 1 |
| GSE360_DC_VS_MAC_T_GONDII_UP         | -0,102 | 0,005 | 0,00054 | 1 |
| MODULE_322                           | -0,102 | 0,005 | 0,00119 | 1 |
| MODULE_89                            | -0,102 | 0,005 | 0,11711 | 1 |
| GSE7460_TCONV_VS_TREG_LN_UP          | -0,102 | 0,005 | 0,00067 | 1 |
| MULLIGHAN_NPM1_SIGNATURE_3_UP        | -0,102 | 0,005 | 0,00143 | 1 |
| GSE15930_NAIVE_VS_24H_IN_VITRO_STIM  | -0,102 | 0,005 | 0,12692 | 1 |
| REACTOME_P75_NTR_RECEPTOR_MEDIATED   | -0,102 | 0,005 | 0,00024 | 1 |
| MIKKELSEN_MCV6_HCP_WITH_H3K27ME3     | -0,102 | 0,005 | 0,00017 | 1 |
| ENDONUCLEASE_ACTIVITY_GO_0016893     | -0,102 | 0,005 | 0,20929 | 1 |
| INTEGRAL_TO_PLASMA_MEMBRANE          | -0,102 | 0,005 | 0,00061 | 1 |
| LI_PROSTATE_CANCER_EPIGENETIC        | -0,102 | 0,005 | 0,0009  | 1 |
| CHEN_PDGF_TARGETS                    | -0,102 | 0,005 | 0,00342 | 1 |
| GSE14308_NAIVE_CD4_TCELL_VS_NATURAL  | -0,102 | 0,005 | 0,00126 | 1 |
| RIBONUCLEOPROTEIN_BINDING            | -0,102 | 0,005 | 0,06121 | 1 |
| MODULE_301                           | -0,102 | 0,005 | 0,00177 | 1 |
| GSE17721_POLYIC_VS_GARDIQUIMOD_0.5H  | -0,102 | 0,005 | 0,00277 | 1 |
| PYEON_CANCER_HEAD_AND_NECK_VS_CERV   | -0,102 | 0,005 | 0,05886 | 1 |
| PRC1_BMI_UP.V1_DN                    | -0,102 | 0,005 | 0,00059 | 1 |
| GSE36392_TYPE_2_MYELOID_VS_EOSINOPHI | -0,102 | 0,005 | 0,00054 | 1 |
| TOOKER_GEMCITABINE_RESISTANCE_DN     | -0,102 | 0,005 | 0,05874 | 1 |
| REACTOME_SYNTHESIS_OF_DNA            | -0,102 | 0,005 | 0,11506 | 1 |
| GRATIAS_RETINOBLASTOMA_16Q24         | -0,102 | 0,005 | 0,29074 | 1 |
| PID_ALPHASYNUCLEIN_PATHWAY           | -0,102 | 0,005 | 0,0115  | 1 |
| PROTEIN_KINASE_REGULATOR_ACTIVITY    | -0,102 | 0,005 | 0,00116 | 1 |
| chr7q32                              | -0,102 | 0,005 | 0,02797 | 1 |
| YUAN_ZNF143_PARTNERS                 | -0,102 | 0,005 | 0,05707 | 1 |
| REACTOME_METAL_ION_SLC_TRANSPORTERS  | 0,102  | 0,005 | 0,00507 | 1 |
| JAK_STAT_CASCADE                     | -0,102 | 0,005 | 0,00294 | 1 |

|                                       |        |       |         |   |
|---------------------------------------|--------|-------|---------|---|
| GARGALOVIC_RESPONSE_TO_OXIDIZED_PHOS  | -0,102 | 0,005 | 0,01119 | 1 |
| SNF5_DN.V1_UP                         | -0,102 | 0,005 | 0,00976 | 1 |
| GSE22886_NAIVE_CD4_TCELL_VS_48H_ACT   | -0,102 | 0,005 | 0,18879 | 1 |
| ISHIDA_TARGETS_OF_SYT_S SX_FUSIONS    | 0,102  | 0,005 | 0,01936 | 1 |
| PID_VEGF_VEGFR_PATHWAY                | -0,102 | 0,005 | 0,00098 | 1 |
| chr7q35                               | -0,102 | 0,006 | 0,0052  | 1 |
| CSR_EARLY_UP.V1_UP                    | -0,102 | 0,006 | 0,19044 | 1 |
| GSE1432_CTRL_VS_IFNG_1H_MICROGLIA_UP  | -0,102 | 0,006 | 0,00051 | 1 |
| INTRINSIC_TO_PLASMA_MEMBRANE          | -0,102 | 0,006 | 0,00059 | 1 |
| GSE3982_EOSINOPHIL_VS_MAC_DN          | -0,102 | 0,006 | 0,10406 | 1 |
| RELA_DN.V1_DN                         | -0,102 | 0,006 | 0,00053 | 1 |
| MORF_ANP32B                           | -0,102 | 0,006 | 0,05744 | 1 |
| BILANGES_SERUM_AND_RAPAMYCIN_SENSITIV | -0,102 | 0,006 | 0,00132 | 1 |
| MORF_FSHR                             | -0,101 | 0,006 | 0,00084 | 1 |
| MYELOID_LEUKOCYTE_DIFFERENTIATION     | -0,101 | 0,006 | 0,04649 | 1 |
| GSE6269_HEALTHY_VS_STREP_PNEUMO_INF.  | -0,101 | 0,006 | 0,00065 | 1 |
| V\$MEF2_01                            | -0,101 | 0,006 | 0,00142 | 1 |
| PILON_KLF1_TARGETS_DN                 | -0,101 | 0,006 | 0,03712 | 1 |
| REACTOME_RECYCLING_PATHWAY_OF_L1      | -0,101 | 0,006 | 0,18413 | 1 |
| GSE26928_NAIVE_VS_EFF_MEMORY_CD4_TC   | -0,101 | 0,006 | 0,00344 | 1 |
| V\$HIF1_Q3                            | -0,101 | 0,006 | 0,01056 | 1 |
| GSE27786_CD4_TCELL_VS_MONO_MAC_DN     | -0,101 | 0,006 | 0,00973 | 1 |
| NITROGEN_COMPOUND_CATABOLIC_PROCESS   | 0,101  | 0,006 | 0,07327 | 1 |
| GGTAACC,MIR-409-5P                    | -0,101 | 0,006 | 0,00932 | 1 |
| BYSTRYKH_HEMATOPOIESIS_STEM_CELL_QTL  | -0,101 | 0,006 | 0,01446 | 1 |
| UEDA_PERIFERAL_CLOCK                  | -0,101 | 0,006 | 0,03471 | 1 |
| chr10q21                              | -0,101 | 0,006 | 0,0035  | 1 |
| TIAN_TNF_SIGNALING_VIA_NFKB           | -0,101 | 0,006 | 0,01832 | 1 |
| GSE17721_CTRL_VS_PAM3CSK4_4H_BMDM_    | -0,101 | 0,006 | 0,00062 | 1 |
| GRADE_COLON_VS_RECTAL_CANCER_UP       | -0,101 | 0,006 | 0,00604 | 1 |
| CHANG_IMMORTALIZED_BY_HPV31_UP        | -0,101 | 0,006 | 0,00429 | 1 |
| PID_ATF2_PATHWAY                      | -0,101 | 0,006 | 0,00149 | 1 |
| REACTOME_DIGESTION_OF_DIETARY_CARBOH  | -0,101 | 0,006 | 0,03276 | 1 |
| RAMPON_ENRICHED_LEARNING_ENVIRONMEN   | -0,101 | 0,006 | 0,0385  | 1 |
| V\$OSF2_Q6                            | -0,101 | 0,006 | 0,00099 | 1 |
| V\$IRF2_01                            | -0,101 | 0,006 | 0,00082 | 1 |
| RELA_DN.V1_UP                         | -0,101 | 0,006 | 0,00152 | 1 |
| V\$AP1_Q6                             | -0,101 | 0,006 | 0,01951 | 1 |
| GSE17721_0.5H_VS_8H_GARDIQUIMOD_BMD   | -0,101 | 0,006 | 0,00462 | 1 |
| GAVIN_FOXP3_TARGETS_CLUSTER_P4        | -0,101 | 0,006 | 0,00397 | 1 |
| REACTOME_SRP_DEPENDENT_COTRANSLATIO   | -0,101 | 0,006 | 0,00456 | 1 |
| GSE2706_R848_VS_LPS_2H_STIM_DC_DN     | -0,101 | 0,006 | 0,00777 | 1 |



|                                       |        |       |         |   |
|---------------------------------------|--------|-------|---------|---|
| GCM_SMO                               | -0,101 | 0,006 | 0,00091 | 1 |
| CAIRO_PML_TARGETS_BOUND_BY_MYC_DN     | -0,101 | 0,006 | 0,00166 | 1 |
| GROWTH_FACTOR_ACTIVITY                | -0,101 | 0,006 | 0,00021 | 1 |
| PID_PTP1BPATHWAY                      | -0,101 | 0,006 | 0,00233 | 1 |
| HAHTOLA_SEZARY_SYNDROM_DN             | -0,101 | 0,006 | 0,00114 | 1 |
| GSE2706_UNSTIM_VS_8H_LPS_DC_DN        | -0,101 | 0,006 | 0,01617 | 1 |
| LOCKWOOD_AMPLIFIED_IN_LUNG_CANCER     | -0,101 | 0,006 | 0,03744 | 1 |
| GSE360_CTRL_VS_B_MALAYI_HIGH_DOSE_M   | -0,101 | 0,006 | 0,00148 | 1 |
| AACWWCAANK_UNKNOWN                    | -0,101 | 0,006 | 0,00014 | 1 |
| MIKKELSEN_IPS_LCP_WITH_H3K27ME3       | -0,101 | 0,006 | 0,00015 | 1 |
| GSE8678_IL7R_LOW_VS_HIGH_EFF_CD8_TCI  | -0,101 | 0,006 | 0,00268 | 1 |
| MODULE_560                            | -0,101 | 0,006 | 0,03112 | 1 |
| NIKOLSKY_BREAST_CANCER_20Q12_Q13_AM   | -0,101 | 0,006 | 0,01109 | 1 |
| VERHAAK_AML_WITH_NPM1_MUTATED_DN      | -0,101 | 0,006 | 0,0002  | 1 |
| GSE360_CTRL_VS_B_MALAYI_HIGH_DOSE_D   | -0,101 | 0,006 | 0,00371 | 1 |
| ALCOHOL_METABOLIC_PROCESS             | -0,101 | 0,006 | 0,00274 | 1 |
| GSE26669_CD4_VS_CD8_TCELL_IN_MLR_CC   | -0,101 | 0,006 | 0,00131 | 1 |
| MODULE_41                             | -0,101 | 0,006 | 0,0014  | 1 |
| GSE1432_6H_VS_24H_IFNG_MICROGLIA_UP   | -0,101 | 0,006 | 0,02676 | 1 |
| GSE17721_PAM3CSK4_VS_GADIQUIMOD_12H   | -0,101 | 0,006 | 0,00093 | 1 |
| REACTOME_PURINE_SALVAGE               | -0,101 | 0,006 | 0,05465 | 1 |
| V\$CACBINDINGPROTEIN_Q6               | -0,101 | 0,006 | 0,00032 | 1 |
| MODULE_366                            | -0,101 | 0,006 | 0,00016 | 1 |
| GSE15930_NAIVE_VS_72H_IN_VITRO_STIM_  | -0,101 | 0,006 | 0,08905 | 1 |
| V\$MSX1_01                            | -0,101 | 0,006 | 0,00053 | 1 |
| NEGATIVE_REGULATION_OF_PHOSPHATE_ME   | -0,101 | 0,006 | 0,01338 | 1 |
| GSE22886_NAIVE_CD4_TCELL_VS_DC_UP     | -0,101 | 0,006 | 0,00018 | 1 |
| MORF_JUND                             | -0,101 | 0,006 | 0,00215 | 1 |
| TRANSFERASE_ACTIVITY_TRANSFERRING_HEX | -0,101 | 0,006 | 0,04928 | 1 |
| VERRECCHIA_DELAYED_RESPONSE_TO_TGFB   | -0,1   | 0,006 | 0,01924 | 1 |
| GSE32423_MEMORY_VS_NAIVE_CD8_TCELL_   | -0,1   | 0,006 | 0,01469 | 1 |
| SUBSTRATE_SPECIFIC_TRANSMEMBRANE_TRA  | -0,1   | 0,006 | 0,00019 | 1 |
| WOTTON_RUNX_TARGETS_DN                | -0,1   | 0,006 | 0,00172 | 1 |
| MORF_PTPN11                           | -0,1   | 0,006 | 0,25016 | 1 |
| REACTOME_PLATELET_HOMEOSTASIS         | -0,1   | 0,006 | 0,00218 | 1 |
| GSE17721_POLYIC_VS_GARDIQUIMOD_6H_BI  | -0,1   | 0,006 | 0,12174 | 1 |
| GSE9988_LPS_VS_CTRL_TREATED_MONOCY    | -0,1   | 0,006 | 0,02321 | 1 |
| YEMELYANOV_GR_TARGETS_DN              | -0,1   | 0,006 | 0,00607 | 1 |
| PID_INSULIN_GLUCOSE_PATHWAY           | -0,1   | 0,006 | 0,11941 | 1 |
| MODULE_221                            | 0,1    | 0,006 | 0,16759 | 1 |
| LIU_NASOPHARYNGEAL_CARCINOMA          | -0,1   | 0,006 | 0,00148 | 1 |
| MORF_BCL2                             | -0,1   | 0,006 | 0,00015 | 1 |

|                                                                                                         |      |       |         |   |
|---------------------------------------------------------------------------------------------------------|------|-------|---------|---|
| LI_WILMS_TUMOR_ANAPLASTIC_DN                                                                            | -0,1 | 0,006 | 0,00636 | 1 |
| GSE6269_FLU_VS_STREP_AUREUS_INF_PBMCV\$EN1_01                                                           | -0,1 | 0,006 | 0,0223  | 1 |
| KIM_BIPOLAR_DISORDER_OLIGODENDROCYTE_BROWNE_HCMV_INFECTION_16HR_UP                                      | -0,1 | 0,006 | 0,00047 | 1 |
| PID_ARF6_TRAFFICKINGPATHWAY                                                                             | -0,1 | 0,006 | 0,00604 | 1 |
| MOROSSETTI_FACIOSCAPULOHUMERAL_MUSCUGSE17721_CTRL_VS_PAM3CSK4_2H_BMDM_OLIGOSACCHARIDE_METABOLIC_PROCESS | -0,1 | 0,006 | 0,0314  | 1 |
| GSE27786_BCELL_VS_CD8_TCELL_DN                                                                          | -0,1 | 0,006 | 0,00042 | 1 |
| INTRACELLULAR_RECEPTOR_MEDIATED_SIGNA                                                                   | -0,1 | 0,006 | 0,03891 | 1 |
| GSE17721_0.5H_VS_12H_GARDIQUIMOD_BMMODULE_457                                                           | -0,1 | 0,006 | 0,00186 | 1 |
| GSE3982_MAST_CELL_VS_BCELL_DN                                                                           | -0,1 | 0,006 | 0,00074 | 1 |
| GSE18791_UNSTIM_VS_NEWCATSLE_VIRUS_KIM_ALL_DISORDERS_CALB1_CORR_UP                                      | -0,1 | 0,006 | 0,00015 | 1 |
| GSE3982_EFF_MEMORY_VS_CENT_MEMORY_GAUSSMANN_MLL_AF4_FUSION_TARGETS_A.MEMBRANE                           | -0,1 | 0,006 | 0,00466 | 1 |
| REACTOME_FORMATION_OF_THE_TERNARY_C                                                                     | -0,1 | 0,006 | 0,00409 | 1 |
| GSE14769_UNSTIM_VS_20MIN_LPS_BMDM_LHINATA_NFKB_MATRIX                                                   | -0,1 | 0,006 | 0,00097 | 1 |
| RIBOSOME_BIOGENESIS_AND_ASSEMBLY                                                                        | -0,1 | 0,006 | 0,00214 | 1 |
| B_CELL_DIFFERENTIATION                                                                                  | -0,1 | 0,006 | 0,00031 | 1 |
| GTCTACC,MIR-379                                                                                         | -0,1 | 0,006 | 0,00547 | 1 |
| V\$PAX2_01                                                                                              | -0,1 | 0,006 | 0,00167 | 1 |
| GSE30083_SP1_VS_SP2_THYMOCYTE_DN                                                                        | -0,1 | 0,006 | 0,00527 | 1 |
| REACTOME_TRANS_GOLGI_NETWORK_VESICL                                                                     | -0,1 | 0,006 | 0,0008  | 1 |
| PURINE_NUCLEOTIDE_BINDING                                                                               | -0,1 | 0,006 | 0,0076  | 1 |
| MORI_PLASMA_CELL_DN                                                                                     | -0,1 | 0,006 | 0,00142 | 1 |
| GCGCTTT,MIR-518B,MIR-518C,MIR-518D                                                                      | -0,1 | 0,006 | 0,21579 | 1 |
| SU_KIDNEY                                                                                               | -0,1 | 0,006 | 0,04406 | 1 |
| FULCHER_INFLAMMATORY_RESPONSE_LECTIN                                                                    | -0,1 | 0,006 | 0,01549 | 1 |
| YANG_MUC2_TARGETS_DUODENUM_3MO_DN                                                                       | -0,1 | 0,006 | 0,0233  | 1 |
| PROTEIN_RNA_COMPLEX_ASSEMBLY                                                                            | -0,1 | 0,006 | 0,00682 | 1 |
| PLASMA_MEMBRANE_PART                                                                                    | -0,1 | 0,006 | 0,00064 | 1 |
| V\$PR_02                                                                                                | -0,1 | 0,006 | 0,00064 | 1 |
| GOERING_BLOOD_HDL_CHOLESTEROL_QTL_T                                                                     | 0,1  | 0,006 | 0,00208 | 1 |
| GSE27786_NKTCELL_VS_MONO_MAC_UP                                                                         | -0,1 | 0,006 | 0,00038 | 1 |
| SU_THYMUS                                                                                               | -0,1 | 0,006 | 0,01623 | 1 |
| ANDROGEN_RECEPTOR_SIGNALING_PATHWAY                                                                     | -0,1 | 0,006 | 0,18576 | 1 |
| PID_IL2_STAT5PATHWAY                                                                                    | -0,1 | 0,006 | 0,05428 | 1 |

|                                               |        |       |         |   |
|-----------------------------------------------|--------|-------|---------|---|
| IZADPANAH_STEM_CELL_ADIPOSE_VS_BONE           | -0,1   | 0,007 | 0,0487  | 1 |
| GSE12366_PLASMA_CELL_VS_MEMORY_BCEI           | -0,099 | 0,007 | 0,00283 | 1 |
| FIGUEROA_AML_METHYLATION_CLUSTER_6_I          | -0,099 | 0,007 | 0,00289 | 1 |
| GNF2_TTN                                      | -0,099 | 0,007 | 0,00031 | 1 |
| MODULE_92                                     | -0,099 | 0,007 | 0,00247 | 1 |
| NEGATIVE_REGULATION_OF_IMMUNE_SYSTEM          | -0,099 | 0,007 | 0,00865 | 1 |
| GSE7460_WT_VS_FOXP3_HET_ACT_TCONV_V\$GATA1_04 | -0,099 | 0,007 | 0,01223 | 1 |
| GSE17721_CPG_VS_GARDIQUIMOD_6H_BMDI           | -0,099 | 0,007 | 0,00073 | 1 |
| BROWNE_HCMV_INFECTION_6HR_UP                  | -0,099 | 0,007 | 0,00374 | 1 |
| DACOSTA_UV_RESPONSE_VIA_ERCC3_TTD_U           | -0,099 | 0,007 | 0,01526 | 1 |
| ACEVEDO_NORMAL_TISSUE_ADJACENT_TO_I           | -0,099 | 0,007 | 0,0462  | 1 |
| PYEON_CANCER_HEAD_AND_NECK_VS_CERV            | -0,099 | 0,007 | 0,01089 | 1 |
| GALI_TP53_TARGETS_APOPTOTIC_UP                | -0,099 | 0,007 | 0,00992 | 1 |
| KRIEG_KDM3A_TARGETS_NOT_HYPOXIA               | -0,099 | 0,007 | 0,01244 | 1 |
| CHEOK_RESPONSE_TO_HD_MTX_UP                   | -0,099 | 0,007 | 0,01383 | 1 |
| LE_SKI_TARGETS_UP                             | -0,099 | 0,007 | 0,02909 | 1 |
| GSE10856_CTRL_VS_TNFRSF6B_IN_MACROP           | -0,099 | 0,007 | 0,00026 | 1 |
| RAMALHO_STEMNESS_UP                           | -0,099 | 0,007 | 0,01607 | 1 |
| GSE26928_EFF_MEMORY_VS_CXCR5_POS_CI           | -0,099 | 0,007 | 0,10986 | 1 |
| REACTOME_PLATELET_ADHESION_TO_EXPOS           | -0,099 | 0,007 | 0,00081 | 1 |
| MODULE_375                                    | -0,099 | 0,007 | 0,00141 | 1 |
| INOSITOL_OR_PHOSPHATIDYLINOSITOL_PHOS         | -0,099 | 0,007 | 0,00339 | 1 |
| PID_LYMPHANGIOGENESIS_PATHWAY                 | -0,099 | 0,007 | 0,03152 | 1 |
| MORF_ERCC4                                    | -0,099 | 0,007 | 0,00193 | 1 |
| STEROID_HORMONE_RECEPTOR_SIGNALING_P          | -0,099 | 0,007 | 0,00063 | 1 |
| STEIN_ESRRA_TARGETS                           | -0,099 | 0,007 | 0,00564 | 1 |
| YORDY_RECIPROCAL_REGULATION_BY_ETS1_          | -0,099 | 0,007 | 0,04107 | 1 |
| PID_INTEGRIN_A4B1_PATHWAY                     | -0,099 | 0,007 | 0,00191 | 1 |
| GSE39820_TGFBETA3_IL6_VS_TGFBETA3_IL          | -0,099 | 0,007 | 0,02974 | 1 |
| MORF_TTN                                      | -0,099 | 0,007 | 0,00209 | 1 |
| KEGG_INSULIN_SIGNALING_PATHWAY                | -0,099 | 0,007 | 0,00083 | 1 |
| KONDO_EZH2_TARGETS                            | -0,099 | 0,007 | 0,00022 | 1 |
| TUBE_MORPHOGENESIS                            | -0,099 | 0,007 | 0,00034 | 1 |
| GSE11924_TH2_VS_TH17_CD4_TCELL_UP             | -0,099 | 0,007 | 0,00283 | 1 |
| PASTURAL_RIZ1_TARGETS_UP                      | -0,099 | 0,007 | 0,00383 | 1 |
| GALIE_TUMOR_ANGIOGENESIS                      | -0,099 | 0,007 | 0,00367 | 1 |
| BIOCARTA_CK1_PATHWAY                          | -0,099 | 0,007 | 0,00065 | 1 |
| AAAGACA,MIR-511                               | -0,099 | 0,007 | 0,01692 | 1 |
| V\$ETS2_B                                     | -0,099 | 0,007 | 0,00066 | 1 |
| MODULE_186                                    | -0,099 | 0,007 | 0,00103 | 1 |
| MODULE_110                                    | -0,099 | 0,007 | 0,00996 | 1 |
|                                               | -0,099 | 0,007 | 0,36185 | 1 |

|                                       |        |       |         |   |
|---------------------------------------|--------|-------|---------|---|
| GSE15324_ELF4_KO_VS_WT_ACTIVATED_CI   | -0,099 | 0,007 | 0,00029 | 1 |
| RIZ_ERYTHROID_DIFFERENTIATION_HBZ     | -0,099 | 0,007 | 0,01311 | 1 |
| PROTEIN_TYROSINE_PHOSPHATASE_ACTIVITY | -0,099 | 0,007 | 0,00096 | 1 |
| PERINUCLEAR_REGION_OF_CYTOPLASM       | -0,099 | 0,007 | 0,04265 | 1 |
| TAATGTG,MIR-323                       | -0,099 | 0,007 | 0,00428 | 1 |
| INTRINSIC_TO_MEMBRANE                 | -0,099 | 0,007 | 0,00082 | 1 |
| V\$TAL1ALPHAE47_01                    | -0,099 | 0,007 | 0,00019 | 1 |
| INTEGRAL_TO_MEMBRANE                  | -0,099 | 0,007 | 0,00086 | 1 |
| ZHAN_MULTIPLE_MYELOMA_HP_UP           | -0,099 | 0,007 | 0,0014  | 1 |
| GSE22886_NAIVE_CD8_TCELL_VS_NEUTROP   | -0,099 | 0,007 | 0,0082  | 1 |
| ZINC_ION_BINDING                      | -0,099 | 0,007 | 0,00703 | 1 |
| GSE20715_0H_VS_24H_OZONE_LUNG_DN      | -0,099 | 0,007 | 0,00173 | 1 |
| NEUROTRANSMITTER_RECEPTOR_ACTIVITY    | -0,099 | 0,007 | 0,00944 | 1 |
| GSE29618_BCELL_VS_MDC_UP              | -0,099 | 0,007 | 0,00525 | 1 |
| REGULATION_OF_IMMUNE_RESPONSE         | -0,099 | 0,007 | 0,01088 | 1 |
| EPITHELIAL_TO_MESENCHYMAL_TRANSITION  | -0,099 | 0,007 | 0,00154 | 1 |
| GSE15659_NAIVE_CD4_TCELL_VS_NONSUPP   | -0,099 | 0,007 | 0,00033 | 1 |
| AGGCACT,MIR-515-3P                    | -0,099 | 0,007 | 0,00629 | 1 |
| GRAESSMANN_APOPTOSIS_BY_SERUM_DEPRIV  | -0,099 | 0,007 | 0,00074 | 1 |
| MCBRYAN_PUBERTAL_BREAST_3_4WK_DN      | -0,099 | 0,007 | 0,00023 | 1 |
| TAAWWATAG_V\$RSRFC4_Q2                | -0,099 | 0,007 | 0,00034 | 1 |
| DRUG_BINDING                          | -0,099 | 0,007 | 0,00833 | 1 |
| GSE10239_NAIVE_VS_KLRG1INT_EFF_CD8_1  | -0,099 | 0,007 | 0,00013 | 1 |
| GSE3982_BASOPHIL_VS_NKCELL_DN         | -0,099 | 0,007 | 0,00059 | 1 |
| RIZ_ERYTHROID_DIFFERENTIATION_CCNE1   | -0,099 | 0,007 | 0,01045 | 1 |
| PENG_RAPAMYCIN_RESPONSE_DN            | -0,099 | 0,007 | 0,37619 | 1 |
| KYNG_NORMAL_AGING_DN                  | -0,099 | 0,007 | 0,00029 | 1 |
| PDGF_ERK_DN.V1_UP                     | -0,099 | 0,007 | 0,01218 | 1 |
| LIU_COMMON_CANCER_GENES               | -0,098 | 0,007 | 0,00226 | 1 |
| REGULATION_OF_CELL_ADHESION           | -0,098 | 0,007 | 0,00597 | 1 |
| MODULE_236                            | -0,098 | 0,007 | 0,00197 | 1 |
| REACTOME_PEPTIDE_CHAIN_ELONGATION     | -0,098 | 0,007 | 0,00288 | 1 |
| MODULE_226                            | -0,098 | 0,007 | 0,0514  | 1 |
| LIU_IL13_MEMORY_MODEL_DN              | 0,098  | 0,007 | 0,03203 | 1 |
| INTEGRAL_TO_GOLGI_MEMBRANE            | 0,098  | 0,007 | 0,07079 | 1 |
| RASHI_NFKB1_TARGETS                   | -0,098 | 0,007 | 0,0078  | 1 |
| GSE17721_LPS_VS_GARDIQUIMOD_6H_BMDM   | -0,098 | 0,007 | 0,00103 | 1 |
| NING_CHRONIC_OBSTRUCTIVE_PULMONARY_I  | -0,098 | 0,007 | 0,00019 | 1 |
| V\$SRF_C                              | -0,098 | 0,007 | 0,00021 | 1 |
| AUJLA_IL22_AND_IL17A_SIGNALING        | -0,098 | 0,007 | 0,1944  | 1 |
| GCM_AIP                               | -0,098 | 0,007 | 0,00531 | 1 |
| chr12p                                | 0,098  | 0,007 | 0,05318 | 1 |

|                                       |        |       |         |   |
|---------------------------------------|--------|-------|---------|---|
| GSE14000_TRANSLATED_RNA_VS_MRNA_4H    | -0,098 | 0,007 | 0,02314 | 1 |
| HOLLEMAN_VINCRIStINE_RESISTANCE_ALL_D | -0,098 | 0,007 | 0,00403 | 1 |
| JOHNSTONE_PARVB_TARGETS_2_DN          | -0,098 | 0,007 | 0,02471 | 1 |
| BOQUEST_STEM_CELL_CULTURED_VS_FRESH   | -0,098 | 0,007 | 0,00017 | 1 |
| VANDESLUIS_COMMD1_TARGETS_GROUP_3_I   | -0,098 | 0,007 | 0,00967 | 1 |
| BROWNE_HCMV_INFECTION_48HR_DN         | -0,098 | 0,007 | 0,00023 | 1 |
| REACTOME_INFLUENZA_VIRAL_RNA_TRANSCI  | -0,098 | 0,007 | 0,00458 | 1 |
| POTTI_TOPOTECAN_SENSITIVITY           | -0,098 | 0,007 | 0,00107 | 1 |
| chrXq26                               | -0,098 | 0,007 | 0,05133 | 1 |
| SENSORY_PERCEPTION                    | -0,098 | 0,007 | 0,00767 | 1 |
| VANDESLUIS_COMMD1_TARGETS_GROUP_3_I   | -0,098 | 0,007 | 0,02194 | 1 |
| REGULATION_OF_PROTEIN_METABOLIC_PROC  | -0,098 | 0,007 | 0,00327 | 1 |
| KEGG_SYSTEMIC_LUPUS_ERYTHEMATOSUS     | -0,098 | 0,007 | 0,0517  | 1 |
| BROWNE_HCMV_INFECTION_30MIN_UP        | -0,098 | 0,007 | 0,00028 | 1 |
| NEGATIVE_REGULATION_OF_PROGRAMMED_C   | -0,098 | 0,007 | 0,0113  | 1 |
| PLASMA_MEMBRANE                       | -0,098 | 0,007 | 0,00073 | 1 |
| LEE_METASTASIS_AND_ALTERNATIVE_SPLICI | -0,098 | 0,007 | 0,00033 | 1 |
| V\$ARNT_01                            | -0,098 | 0,007 | 0,00134 | 1 |
| INNATE_IMMUNE_RESPONSE                | -0,098 | 0,007 | 0,00416 | 1 |
| TCTGATA,MIR-361                       | -0,098 | 0,007 | 0,00159 | 1 |
| ONKEN_UVEAL_MELANOMA_UP               | -0,098 | 0,007 | 0,01834 | 1 |
| SMITH_LIVER_CANCER                    | -0,098 | 0,007 | 0,14101 | 1 |
| YATTNATC_UNKNOWN                      | -0,098 | 0,007 | 0,0002  | 1 |
| GSE3982_BCELL_VS_EFF_MEMORY_CD4_TCE   | -0,098 | 0,007 | 0,00987 | 1 |
| REACTOME_SEMA4D_IN_SEMAPHORIN_SIGNAL  | -0,098 | 0,007 | 0,00048 | 1 |
| MARTINEZ_RB1_AND_TP53_TARGETS_UP      | -0,098 | 0,007 | 0,00121 | 1 |
| SAKAI_TUMOR_INFILTRATING_MONOCYTES_D  | -0,098 | 0,007 | 0,14105 | 1 |
| CHENG_RESPONSE_TO_NICKEL_ACETATE      | -0,098 | 0,007 | 0,01001 | 1 |
| GRAHAM_CML_QUIESCENT_VS_NORMAL_DIVI   | -0,098 | 0,008 | 0,02722 | 1 |
| GSE17721_CTRL_VS_POLYIC_8H_BMDM_UP    | -0,098 | 0,008 | 0,02485 | 1 |
| FAELT_B_CLL_WITH_VH_REARRANGEMENTS_   | -0,098 | 0,008 | 0,00049 | 1 |
| ACETYLTRANSFERASE_ACTIVITY            | 0,098  | 0,008 | 0,05347 | 1 |
| BIOCARTA_PDGF_PATHWAY                 | -0,098 | 0,008 | 0,00171 | 1 |
| MORF_TERF2IP                          | -0,098 | 0,008 | 0,04149 | 1 |
| HUMMERICH_SKIN_CANCER_PROGRESSION_DN  | -0,098 | 0,008 | 0,00023 | 1 |
| HILLION_HMGA1B_TARGETS                | -0,098 | 0,008 | 0,01292 | 1 |
| MEDIATOR_COMPLEX                      | -0,098 | 0,008 | 0,16934 | 1 |
| REACTOME_DNA_STRAND_ELONGATION        | -0,098 | 0,008 | 0,05331 | 1 |
| MA_PITUITARY_FETAL_VS_ADULT_UP        | -0,098 | 0,008 | 0,00497 | 1 |
| HOLLMANN_APOPTOSIS_VIA_CD40_DN        | -0,098 | 0,008 | 0,01205 | 1 |
| GSE17721_CTRL_VS_PAM3CSK4_24H_BMDM    | -0,098 | 0,008 | 0,05135 | 1 |
| TAKEDA_TARGETS_OF_NUP98_HOXA9_FUSIC   | -0,098 | 0,008 | 0,01894 | 1 |

|                                          |        |       |         |   |
|------------------------------------------|--------|-------|---------|---|
| MARSON_BOUND_BY_FOXP3_UNSTIMULATED       | -0,098 | 0,008 | 0,00113 | 1 |
| HEMOPOIESIS                              | -0,098 | 0,008 | 0,00564 | 1 |
| REACTOME_VEGF_LIGAND_RECEPTOR_INTERA     | -0,098 | 0,008 | 0,0014  | 1 |
| CAGCTTT,MIR-320                          | -0,098 | 0,008 | 0,00133 | 1 |
| SEKI_INFLAMMATORY_RESPONSE_LPS_UP        | -0,098 | 0,008 | 0,01582 | 1 |
| PETRETTO_CARDIAC_HYPERTROPHY             | -0,098 | 0,008 | 0,00095 | 1 |
| HAN_JNK_SINGALING_UP                     | -0,098 | 0,008 | 0,00126 | 1 |
| KOYAMA_SEMA3B_TARGETS_UP                 | -0,098 | 0,008 | 0,00018 | 1 |
| TGAATGT,MIR-181A,MIR-181B,MIR-181C,MIR-1 | -0,098 | 0,008 | 0,00213 | 1 |
| KOBAYASHI_RESPONSE_TO_ROMIDEPSIN         | -0,097 | 0,008 | 0,01375 | 1 |
| JAEGER_METASTASIS_UP                     | -0,097 | 0,008 | 0,17446 | 1 |
| ZHU_CMV_24_HR_UP                         | -0,097 | 0,008 | 0,13956 | 1 |
| ZHAN_MULTIPLE_MYELOMA_SUBGROUPS          | -0,097 | 0,008 | 0,24785 | 1 |
| GSE30083_SP1_VS_SP2_THYMOCYTE_UP         | -0,097 | 0,008 | 0,00115 | 1 |
| V\$OCT_Q6                                | -0,097 | 0,008 | 0,00025 | 1 |
| REACTOME_ORC1_REMOVAL_FROM_CHROMA        | -0,097 | 0,008 | 0,27861 | 1 |
| ACTGAAA,MIR-30A-3P,MIR-30E-3P            | -0,097 | 0,008 | 0,00111 | 1 |
| REACTOME_RESPONSE_TO_ELEVATED_PLATE      | -0,097 | 0,008 | 0,00145 | 1 |
| GSE17721_PAM3CSK4_VS_CPG_12H_BMDM        | -0,097 | 0,008 | 0,00212 | 1 |
| AMIT_SERUM_RESPONSE_60_MCF10A            | -0,097 | 0,008 | 0,00149 | 1 |
| MIKKELSEN_IPS_LCP_WITH_H3K4ME3_AND_I     | -0,097 | 0,008 | 0,00068 | 1 |
| CAGTGTT,MIR-141,MIR-200A                 | -0,097 | 0,008 | 0,00099 | 1 |
| LIN_SILENCED_BY_TUMOR_MICROENVIRONMEI    | -0,097 | 0,008 | 0,21043 | 1 |
| AAGCACT,MIR-520F                         | -0,097 | 0,008 | 0,00138 | 1 |
| RACCACAR_V\$AML_Q6                       | -0,097 | 0,008 | 0,00039 | 1 |
| WESTON_VEGFA_TARGETS                     | -0,097 | 0,008 | 0,00191 | 1 |
| TRANSMEMBRANE_RECEPTOR_ACTIVITY          | -0,097 | 0,008 | 0,00049 | 1 |
| GAVIN_FOXP3_TARGETS_CLUSTER_T7           | -0,097 | 0,008 | 0,03439 | 1 |
| NIELSEN_MALIGNANT_FIBROUS_HISTIOCYTOMA   | -0,097 | 0,008 | 0,01716 | 1 |
| MORF_MAGEA9                              | -0,097 | 0,008 | 0,00021 | 1 |
| GSE3982_MAC_VS_NEUTROPHIL_LPS_STIM_I     | -0,097 | 0,008 | 0,00019 | 1 |
| MODULE_362                               | -0,097 | 0,008 | 0,00211 | 1 |
| FIRESTEIN_CTNNB1_PATHWAY                 | -0,097 | 0,008 | 0,10171 | 1 |
| AGCTCCT,MIR-28                           | -0,097 | 0,008 | 0,00023 | 1 |
| GSE17721_PAM3CSK4_VS_CPG_16H_BMDM        | -0,097 | 0,008 | 0,00402 | 1 |
| GSE17721_CTRL_VS_GARDIQUIMOD_24H_BM      | -0,097 | 0,008 | 0,09816 | 1 |
| REGULATION_OF_CELLULAR_PROTEIN_METAE     | -0,097 | 0,008 | 0,00441 | 1 |
| MODULE_448                               | -0,097 | 0,008 | 0,00269 | 1 |
| MORF_PTPRB                               | -0,097 | 0,008 | 0,00109 | 1 |
| REACTOME_SYNTHESIS_OF_BILE_ACIDS_AND     | 0,097  | 0,008 | 0,20047 | 1 |
| FONTAINE_FOLLICULAR_THYROID_ADENOMA      | -0,097 | 0,008 | 0,01131 | 1 |
| GSE17721_LPS_VS_GARDIQUIMOD_8H_BMDM      | -0,097 | 0,008 | 0,07598 | 1 |

|                                       |        |       |         |   |
|---------------------------------------|--------|-------|---------|---|
| GTAAAG,MIR-302B                       | -0,097 | 0,008 | 0,0018  | 1 |
| REACTOME_SIGNALLING_TO_RAS            | -0,097 | 0,008 | 0,01052 | 1 |
| GSE36476_CTRL_VS_TSST_ACT_16H_MEMO    | -0,097 | 0,008 | 0,39224 | 1 |
| chr13q21                              | -0,097 | 0,008 | 0,03165 | 1 |
| KEGG_DNA_REPLICATION                  | -0,097 | 0,008 | 0,0464  | 1 |
| MANALO_HYPOXIA_UP                     | -0,097 | 0,008 | 0,00162 | 1 |
| MODULE_331                            | -0,097 | 0,008 | 0,01719 | 1 |
| GNF2_TPT1                             | -0,097 | 0,008 | 0,00306 | 1 |
| chr16q22                              | -0,097 | 0,008 | 0,09559 | 1 |
| LOPES_METHYLATED_IN_COLON_CANCER_UP   | -0,097 | 0,008 | 0,00189 | 1 |
| WANG_RESPONSE_TO_FORSKOLIN_UP         | -0,097 | 0,008 | 0,00248 | 1 |
| TRANSFERASE_ACTIVITY_TRANSFERRING_PEN | -0,097 | 0,008 | 0,26373 | 1 |
| V\$PEA3_Q6                            | -0,097 | 0,008 | 0,00591 | 1 |
| MARSON_FOXP3_CORE_DIRECT_TARGETS      | -0,097 | 0,008 | 0,0072  | 1 |
| GSE17721_PAM3CSK4_VS_GADIQUIMOD_8H    | -0,097 | 0,008 | 0,06868 | 1 |
| V\$COUP_01                            | -0,097 | 0,008 | 0,00028 | 1 |
| MEISSNER_NPC_HCP_WITH_H3K4ME2_AND_F   | -0,097 | 0,008 | 0,00077 | 1 |
| GSE27786_LIN_NEG_VS_NEUTROPHIL_DN     | -0,097 | 0,008 | 0,00051 | 1 |
| KRAS.PROSTATE_UP.V1_UP                | -0,097 | 0,008 | 0,00017 | 1 |
| GSE17721_PAM3CSK4_VS_GADIQUIMOD_16H   | -0,097 | 0,008 | 0,03864 | 1 |
| JAK2_DN.V1_UP                         | -0,097 | 0,008 | 0,0002  | 1 |
| CGGTGTG,MIR-220                       | 0,097  | 0,008 | 0,19035 | 1 |
| GSE20366_CD103_POS_VS_CD103_KLRG1_    | -0,097 | 0,008 | 0,0002  | 1 |
| GROSS_HYPOXIA_VIA_ELK3_ONLY_UP        | -0,097 | 0,008 | 0,02585 | 1 |
| MIKKELSEN_NPC_HCP_WITH_H3K27ME3       | -0,097 | 0,008 | 0,00039 | 1 |
| WORSCHER_TUMOR_EVASION_AND_TOLERC     | -0,097 | 0,008 | 0,02824 | 1 |
| MIKKELSEN_PLURIPOTENT_STATE_DN        | -0,096 | 0,008 | 0,0066  | 1 |
| VISALA_AGING_LYMPHOCYTE_DN            | -0,096 | 0,008 | 0,03209 | 1 |
| GSE17721_LPS_VS_PAM3CSK4_6H_BMDM_L    | -0,096 | 0,008 | 0,0047  | 1 |
| KRAS.50_UP.V1_DN                      | -0,096 | 0,008 | 0,141   | 1 |
| GSE17721_LPS_VS_CPG_8H_BMDM_UP        | -0,096 | 0,008 | 0,00633 | 1 |
| GSE17721_LPS_VS_POLYIC_16H_BMDM_DN    | -0,096 | 0,008 | 0,01787 | 1 |
| REGULATION_OF_MULTICELLULAR_ORGANISM  | -0,096 | 0,008 | 0,00221 | 1 |
| GSE3982_NEUTROPHIL_VS_BCELL_UP        | -0,096 | 0,009 | 0,01343 | 1 |
| GCM_TEC                               | -0,096 | 0,009 | 0,00223 | 1 |
| MEISSNER_BRAIN_HCP_WITH_H3K27ME3      | -0,096 | 0,009 | 0,01434 | 1 |
| V\$TAL1BETA47_01                      | -0,096 | 0,009 | 0,0002  | 1 |
| GSE37416_CTRL_VS_3H_F_TULARENSIS_LV:  | -0,096 | 0,009 | 0,0498  | 1 |
| MORF_G22P1                            | -0,096 | 0,009 | 0,14239 | 1 |
| GENTILE_UV_RESPONSE_CLUSTER_D2        | -0,096 | 0,009 | 0,00672 | 1 |
| CERIBELLI_GENES_INACTIVE_AND_BOUND_BY | -0,096 | 0,009 | 0,00062 | 1 |
| PID_FOXOPATHWAY                       | -0,096 | 0,009 | 0,02552 | 1 |

|                                       |        |       |         |   |
|---------------------------------------|--------|-------|---------|---|
| PIONTEK_PKD1_TARGETS_DN               | -0,096 | 0,009 | 0,02203 | 1 |
| REACTOME_CDC6_ASSOCIATION_WITH_THE_   | -0,096 | 0,009 | 0,07072 | 1 |
| GSE22886_DAY1_VS_DAY7_MONOCYTE_IN_    | -0,096 | 0,009 | 0,02012 | 1 |
| GCGSCMNTTT_UNKNOWN                    | -0,096 | 0,009 | 0,00721 | 1 |
| PILON_KLF1_TARGETS_UP                 | -0,096 | 0,009 | 0,00016 | 1 |
| E2F1_UP.V1_DN                         | -0,096 | 0,009 | 0,00139 | 1 |
| ATATGCA,MIR-448                       | -0,096 | 0,009 | 0,00457 | 1 |
| WESTON_VEGFA_TARGETS_3HR              | -0,096 | 0,009 | 0,01071 | 1 |
| LU_TUMOR_ENDOTHELIAL_MARKERS_UP       | -0,096 | 0,009 | 0,00556 | 1 |
| SMID_BREAST_CANCER_RELAPSE_IN_PLEURA  | -0,096 | 0,009 | 0,32017 | 1 |
| GSE6269_HEALTHY_VS_E_COLI_INF_PBMC_I  | -0,096 | 0,009 | 0,01006 | 1 |
| KONDO_PROSTATE_CANCER_WITH_H3K27ME    | -0,096 | 0,009 | 0,00104 | 1 |
| COATED_MEMBRANE                       | -0,096 | 0,009 | 0,0833  | 1 |
| MEMBRANE_COAT                         | -0,096 | 0,009 | 0,0833  | 1 |
| PID_CXCR4_PATHWAY                     | -0,096 | 0,009 | 0,00523 | 1 |
| TCATCTC,MIR-143                       | -0,096 | 0,009 | 0,00032 | 1 |
| PID_S1P_S1P1_PATHWAY                  | -0,096 | 0,009 | 0,0091  | 1 |
| CASPASE_REGULATOR_ACTIVITY            | -0,096 | 0,009 | 0,03291 | 1 |
| KEGG_RIBOSOME                         | -0,096 | 0,009 | 0,00428 | 1 |
| YANG_BREAST_CANCER_ESR1_BULK_UP       | 0,096  | 0,009 | 0,59709 | 1 |
| GSE17721_LPS_VS_GARDIQUIMOD_1H_BMDM   | -0,096 | 0,009 | 0,00428 | 1 |
| TCGA_GLIOBLASTOMA_COPY_NUMBER_UP      | -0,096 | 0,009 | 0,01688 | 1 |
| GINESTIER_BREAST_CANCER_ZNF217_AMPLIF | 0,096  | 0,009 | 0,08355 | 1 |
| REACTOME_M_G1_TRANSITION              | -0,096 | 0,009 | 0,2446  | 1 |
| PID_INTEGRIN_CS_PATHWAY               | -0,096 | 0,009 | 0,00433 | 1 |
| KEGG_GLYCOSAMINOGLYCAN_BIOSYNTHESIS_  | -0,096 | 0,009 | 0,01103 | 1 |
| KORKOLA_SEMINOMA_UP                   | -0,096 | 0,009 | 0,01364 | 1 |
| N_METHYLTRANSFERASE_ACTIVITY          | -0,096 | 0,009 | 0,00848 | 1 |
| GSE22886_CD8_VS_CD4_NAIVE_TCELL_DN    | -0,096 | 0,009 | 0,00021 | 1 |
| GSE15930_STIM_VS_STIM_AND_IFNAB_24H_  | -0,096 | 0,009 | 0,00135 | 1 |
| STEINER_ERYTHROCYTE_MEMBRANE_GENES    | -0,096 | 0,009 | 0,01025 | 1 |
| PID_RANBP2PATHWAY                     | -0,096 | 0,009 | 0,12088 | 1 |
| GNF2_UBE2I                            | -0,096 | 0,009 | 0,02429 | 1 |
| BIOCARTA_IL2RB_PATHWAY                | -0,096 | 0,009 | 0,00541 | 1 |
| SCIAN_CELL_CYCLE_TARGETS_OF_TP53_ANI  | -0,096 | 0,009 | 0,00454 | 1 |
| REGULATION_OF_G_PROTEIN_COUPLED_RECE  | -0,096 | 0,009 | 0,00032 | 1 |
| EPIDERMAL_GROWTH_FACTOR_RECEPTOR_SIK  | -0,096 | 0,009 | 0,00918 | 1 |
| MAEKAWA_ATF2_TARGETS                  | 0,096  | 0,009 | 0,03765 | 1 |
| REACTOME_TRAFFICKING_OF_GLUR2_CONTAI  | -0,096 | 0,009 | 0,00068 | 1 |
| GSE27786_CD8_TCELL_VS_NKTCELL_UP      | -0,096 | 0,009 | 0,00034 | 1 |
| NUCLEOTIDE_BINDING                    | -0,096 | 0,009 | 0,00045 | 1 |
| V\$GATA1_03                           | -0,096 | 0,009 | 0,00061 | 1 |



|                                       |        |       |         |   |
|---------------------------------------|--------|-------|---------|---|
| chr7p12                               | -0,096 | 0,009 | 0,2032  | 1 |
| GSE17721_CTRL_VS_CPG_4H_BMDM_DN       | -0,095 | 0,009 | 0,0033  | 1 |
| MODULE_444                            | -0,095 | 0,009 | 0,00546 | 1 |
| CYTOKINE_ACTIVITY                     | -0,095 | 0,009 | 0,0218  | 1 |
| CORRE_MULTIPLE_MYELOMA_UP             | -0,095 | 0,009 | 0,00244 | 1 |
| GNF2_G22P1                            | -0,095 | 0,009 | 0,1525  | 1 |
| REACTOME_IL_7_SIGNALING               | -0,095 | 0,009 | 0,00332 | 1 |
| GSE13306_RA_VS_UNTREATED_TCONV_DN     | -0,095 | 0,009 | 0,00054 | 1 |
| ACTIN_FILAMENT_BASED_MOVEMENT         | -0,095 | 0,009 | 0,04542 | 1 |
| MODULE_160                            | -0,095 | 0,009 | 0,67028 | 1 |
| AAGCACA,MIR-218                       | -0,095 | 0,009 | 0,00035 | 1 |
| GSE9650_NAIVE_VS_EFF_CD8_TCELL_DN     | -0,095 | 0,009 | 0,03903 | 1 |
| KEGG_ALANINE_ASPARTATE_AND_GLUTAMA    | 0,095  | 0,009 | 0,0329  | 1 |
| GSE27786_BCELL_VS_NEUTROPHIL_UP       | -0,095 | 0,009 | 0,00301 | 1 |
| REACTOME_KERATAN_SULFATE_KERATIN_ME   | -0,095 | 0,009 | 0,01489 | 1 |
| GSE32423_MEMORY_VS_NAIVE_CD8_TCELL_   | -0,095 | 0,009 | 0,00085 | 1 |
| GSE9037_WT_VS_IRAK4_KO_LPS_4H_STIM_   | -0,095 | 0,009 | 0,00548 | 1 |
| GTGCCTT,MIR-506                       | -0,095 | 0,009 | 0,00285 | 1 |
| GSE14350_IL2RB_KO_VS_WT_TREG_DN       | -0,095 | 0,009 | 0,00095 | 1 |
| IKEDA_MIR30_TARGETS_UP                | -0,095 | 0,009 | 0,00191 | 1 |
| GSE3982_EFF_MEMORY_CD4_TCELL_VS_TH1   | -0,095 | 0,009 | 0,00018 | 1 |
| MODULE_537                            | -0,095 | 0,009 | 0,14169 | 1 |
| GSE17721_PAM3CSK4_VS_CPG_1H_BMDM_L    | -0,095 | 0,009 | 0,00043 | 1 |
| NUYTEN_EZH2_TARGETS_UP                | -0,095 | 0,009 | 0,02008 | 1 |
| GSE17721_POLYIC_VS_CPG_4H_BMDM_DN     | -0,095 | 0,009 | 0,02072 | 1 |
| KEGG_LONG_TERM_DEPRESSION             | -0,095 | 0,009 | 0,00119 | 1 |
| NAKAMURA_ADIPOGENESIS_LATE_DN         | -0,095 | 0,009 | 0,00474 | 1 |
| NAKAMURA_ADIPOGENESIS_EARLY_DN        | -0,095 | 0,009 | 0,0048  | 1 |
| GSE17974_IL4_AND_ANTI_IL12_VS_UNTREA  | -0,095 | 0,009 | 0,02124 | 1 |
| MOLECULAR_ADAPTOR_ACTIVITY            | -0,095 | 0,009 | 0,00014 | 1 |
| CATION_TRANSMEMBRANE_TRANSPORTER_AI   | -0,095 | 0,009 | 0,00072 | 1 |
| ABE_VEGFA_TARGETS_30MIN               | -0,095 | 0,009 | 0,00016 | 1 |
| MODULE_47                             | -0,095 | 0,009 | 0,00161 | 1 |
| CASTELLANO_HRAS_AND_NRAS_TARGETS_D    | -0,095 | 0,009 | 0,00046 | 1 |
| HASLINGER_B_CLL_WITH_6Q21_DELETION    | -0,095 | 0,009 | 0,12204 | 1 |
| INTEGRAL_TO_ENDOPLASMIC_RETICULUM_ME  | 0,095  | 0,009 | 0,03957 | 1 |
| INTRINSIC_TO_ENDOPLASMIC_RETICULUM_ME | 0,095  | 0,009 | 0,03957 | 1 |
| ZEMBUTSU_SENSITIVITY_TO_METHOTREXATE  | -0,095 | 0,009 | 0,00163 | 1 |
| HYDROLASE_ACTIVITY_ACTING_ON_CARBON_  | -0,095 | 0,01  | 0,00025 | 1 |
| KLEIN_TARGETS_OF_BCR_ABL1_FUSION      | -0,095 | 0,01  | 0,00823 | 1 |
| GSE39820_CTRL_VS_IL1B_IL6_IL23A_CD4_  | -0,095 | 0,01  | 0,00428 | 1 |
| POSITIVE_REGULATION_OF_IMMUNE_SYSTEM_ | -0,095 | 0,01  | 0,01182 | 1 |

|                                       |        |      |         |   |
|---------------------------------------|--------|------|---------|---|
| BIOCARTA_CDMAC_PATHWAY                | -0,095 | 0,01 | 0,0039  | 1 |
| ZHOU_INFLAMMATORY_RESPONSE_FIMA_UP    | -0,095 | 0,01 | 0,00178 | 1 |
| GSE360_CTRL_VS_L_MAJOR_DC_DN          | -0,095 | 0,01 | 0,00437 | 1 |
| GTPASE_ACTIVATOR_ACTIVITY             | -0,095 | 0,01 | 0,00032 | 1 |
| ZHONG_SECRETOME_OF_LUNG_CANCER_AND    | -0,095 | 0,01 | 0,13476 | 1 |
| CLASPER_LYMPHATIC_VESSELS_DURING_MET  | -0,095 | 0,01 | 0,00396 | 1 |
| MODULE_102                            | -0,095 | 0,01 | 0,16044 | 1 |
| REACTOME_CS_DS_DEGRADATION            | -0,095 | 0,01 | 0,00471 | 1 |
| KORKOLA_EMBRYONIC_CARCCINOMA_VS_SEMI  | -0,095 | 0,01 | 0,01168 | 1 |
| ST_STAT3_PATHWAY                      | -0,095 | 0,01 | 0,00735 | 1 |
| TERAMOTO_OPN_TARGETS_CLUSTER_3        | -0,095 | 0,01 | 0,04361 | 1 |
| BROWNE_HCMV_INFECTION_16HR_DN         | -0,095 | 0,01 | 0,00016 | 1 |
| MODULE_65                             | -0,095 | 0,01 | 0,00431 | 1 |
| CRX_NRL_DN.V1_DN                      | -0,095 | 0,01 | 0,00027 | 1 |
| MODULE_456                            | -0,095 | 0,01 | 0,00341 | 1 |
| S_ADENOSYLMETHIONINE_DEPENDENT_METH'  | -0,095 | 0,01 | 0,03371 | 1 |
| GOLGI_VESICLE_TRANSPORT               | 0,095  | 0,01 | 0,06575 | 1 |
| SHAFFER_IRF4_TARGETS_IN_PLASMA_CELL_' | -0,094 | 0,01 | 0,07255 | 1 |
| DAIRKEE_CANCER_PRONE_RESPONSE_BPA     | -0,094 | 0,01 | 0,02089 | 1 |
| GCM_DENR                              | -0,094 | 0,01 | 0,02908 | 1 |
| ELVIDGE_HIF1A_AND_HIF2A_TARGETS_UP    | -0,094 | 0,01 | 0,40604 | 1 |
| LEE_METASTASIS_AND_ALTERNATIVE_SPLICI | -0,094 | 0,01 | 0,00744 | 1 |
| TCCAGAT,MIR-516-5P                    | -0,094 | 0,01 | 0,00104 | 1 |
| ENDOPEPTIDASE_ACTIVITY                | -0,094 | 0,01 | 0,006   | 1 |
| GSE15930_NAIVE_VS_72H_IN_VITRO_STIM_  | -0,094 | 0,01 | 0,00017 | 1 |
| GSE32423_MEMORY_VS_NAIVE_CD8_TCELL_   | -0,094 | 0,01 | 0,00329 | 1 |
| REACTOME_BRANCHED_CHAIN_AMINO_ACID_   | 0,094  | 0,01 | 0,08763 | 1 |
| GSE20715_0H_VS_6H_OZONE_LUNG_UP       | -0,094 | 0,01 | 0,00548 | 1 |
| chr5q33                               | -0,094 | 0,01 | 0,00645 | 1 |
| VESICLE_COAT                          | -0,094 | 0,01 | 0,1319  | 1 |
| GSE17974_IL4_AND_ANTI_IL12_VS_UNTREA  | -0,094 | 0,01 | 0,00038 | 1 |
| ELVIDGE_HYPOXIA_UP                    | -0,094 | 0,01 | 0,04863 | 1 |
| GSE13306_TREG_VS_TCONV_SPLEEN_DN      | -0,094 | 0,01 | 0,00353 | 1 |
| ZHONG_SECRETOME_OF_LUNG_CANCER_AND    | -0,094 | 0,01 | 0,23889 | 1 |
| REACTOME_PRE_NOTCH_TRANSCRIPTION_AN   | -0,094 | 0,01 | 0,00392 | 1 |
| SAGIV_CD24_TARGETS_UP                 | -0,094 | 0,01 | 0,00832 | 1 |
| AIGNER_ZEB1_TARGETS                   | -0,094 | 0,01 | 0,26856 | 1 |
| SENESE_HDAC2_TARGETS_UP               | -0,094 | 0,01 | 0,075   | 1 |
| MORF_FOSL1                            | -0,094 | 0,01 | 0,00062 | 1 |
| SPIRA_SMOKERS_LUNG_CANCER_DN          | -0,094 | 0,01 | 0,05375 | 1 |
| VERRECCHIA_RESPONSE_TO_TGFB1_C2       | -0,094 | 0,01 | 0,00289 | 1 |
| PROTEIN_AMINO_ACID_DEPHOSPHORYLATION  | -0,094 | 0,01 | 0,00033 | 1 |

|                                               |        |       |         |   |
|-----------------------------------------------|--------|-------|---------|---|
| ACCATTT,MIR-522                               | -0,094 | 0,01  | 0,0061  | 1 |
| chr9p12                                       | -0,094 | 0,01  | 0,21343 | 1 |
| CELLULAR_RESPONSE_TO_NUTRIENT_LEVELS          | -0,094 | 0,01  | 0,02988 | 1 |
| GSE13738_RESTING_VS_TCR_ACTIVATED_CI          | -0,094 | 0,01  | 0,11404 | 1 |
| MAP_KINASE_ACTIVITY                           | -0,094 | 0,01  | 0,05097 | 1 |
| MORF_HAT1                                     | -0,094 | 0,01  | 0,32205 | 1 |
| DER_IFN_ALPHA_RESPONSE_DN                     | -0,094 | 0,01  | 0,02785 | 1 |
| BOYLAN_MULTIPLE_MYELOMA_D_CLUSTER_D           | -0,094 | 0,01  | 0,00569 | 1 |
| LINDSTEDT_DENDRITIC_CELL_MATURATION_C         | -0,094 | 0,01  | 0,00029 | 1 |
| LIM_MAMMARY_STEM_CELL_DN                      | 0,094  | 0,01  | 0,21426 | 1 |
| MODULE_352                                    | -0,094 | 0,01  | 0,15305 | 1 |
| GSE1460_DP_THYMOCYTE_VS_THYMIC_STRC           | -0,094 | 0,01  | 0,00055 | 1 |
| GSE27786_CD8_TCELL_VS_ERYTHROBLAST_V\$OCT1_03 | -0,094 | 0,01  | 0,00724 | 1 |
| SA_PTEN_PATHWAY                               | -0,094 | 0,01  | 0,00031 | 1 |
| GSE17974_CTRL_VS_ACT_IL4_AND_ANTI_IL          | -0,094 | 0,01  | 0,02378 | 1 |
| XU_HGF_TARGETS_INDUCED_BY_AKT1_48HR           | -0,094 | 0,01  | 0,00722 | 1 |
| CELLULAR_RESPIRATION                          | -0,094 | 0,01  | 0,00751 | 1 |
| PID_INSULIN_PATHWAY                           | -0,094 | 0,01  | 0,05145 | 1 |
| NEGATIVE_REGULATION_OF_APOPTOSIS              | -0,094 | 0,01  | 0,00139 | 1 |
| GCM_VAV1                                      | -0,094 | 0,01  | 0,01765 | 1 |
| ZHOU_PANCREATIC_BETA_CELL                     | -0,094 | 0,01  | 0,00374 | 1 |
| KIM_GERMINAL_CENTER_T_HELPER_UP               | 0,094  | 0,01  | 0,12099 | 1 |
| CHANG_IMMORTALIZED_BY_HP31_DN                 | -0,094 | 0,01  | 0,0127  | 1 |
| REACTOME_DESTABILIZATION_OF_MRNA_BY_ACETYLG   | -0,094 | 0,01  | 0,14305 | 1 |
| ACETYLGUCOSAMINYLTRANSFERASE_ACTIVIT          | -0,094 | 0,01  | 0,08905 | 1 |
| TAVAZOIE_METASTASIS                           | -0,094 | 0,01  | 0,07243 | 1 |
| VANTVEER_BREAST_CANCER_ESR1_UP                | -0,094 | 0,01  | 0,00193 | 1 |
| PROTEOGLYCAN_METABOLIC_PROCESS                | 0,094  | 0,01  | 0,40279 | 1 |
| V\$USF_Q6_01                                  | -0,094 | 0,01  | 0,00315 | 1 |
| MODULE_35                                     | -0,094 | 0,01  | 0,00062 | 1 |
| REACTOME_MRNA_DECAY_BY_5_TO_3_EXOR            | -0,094 | 0,01  | 0,47697 | 1 |
| REACTOME_RNA_POL_III_TRANSCRIPTION_INI        | -0,094 | 0,01  | 0,08042 | 1 |
| HOWLIN_PUBERTAL_MAMMARY_GLAND                 | -0,094 | 0,01  | 0,09994 | 1 |
| BROWNE_HCMV_INFECTION_6HR_DN                  | -0,094 | 0,01  | 0,00164 | 1 |
| HENDRICKS_SMARCA4_TARGETS_UP                  | -0,094 | 0,01  | 0,00242 | 1 |
| RYTTCCTG_V\$ETS2_B                            | -0,094 | 0,01  | 0,10935 | 1 |
| DANG_REGULATED_BY_MYC_DN                      | -0,094 | 0,011 | 0,00154 | 1 |
| GSE27786_BCELL_VS_CD4_TCELL_DN                | -0,094 | 0,011 | 0,00453 | 1 |
| GSE8515_CTRL_VS_IL6_4H_STIM_MAC_UP            | -0,094 | 0,011 | 0,00619 | 1 |
| PID_IL2_1PATHWAY                              | -0,094 | 0,011 | 0,00281 | 1 |
| AMINO_ACID_TRANSMEMBRANE_TRANSPORTE           | -0,094 | 0,011 | 0,00224 | 1 |
|                                               | -0,094 | 0,011 | 0,00935 | 1 |

|                                      |        |       |         |   |
|--------------------------------------|--------|-------|---------|---|
| GSE20366_EX_VIVO_VS_DEC205_CONVERSI  | -0,094 | 0,011 | 0,00358 | 1 |
| chr16p12                             | 0,094  | 0,011 | 0,25496 | 1 |
| DURAND_STROMA_MAX_UP                 | -0,094 | 0,011 | 0,00068 | 1 |
| GSE20366_TREG_VS_NAIVE_CD4_TCELL_UP  | -0,094 | 0,011 | 0,01401 | 1 |
| GSE15659_CD45RA_NEG_CD4_TCELL_VS_A   | -0,094 | 0,011 | 0,00086 | 1 |
| ACEVEDO_LIVER_CANCER_WITH_H3K9ME3_C  | -0,094 | 0,011 | 0,04642 | 1 |
| GSE360_L_DONOVANI_VS_M_TUBERCULOSIS  | -0,094 | 0,011 | 0,00539 | 1 |
| GSE360_L_MAJOR_VS_B_MALAYI_HIGH_DOS  | -0,093 | 0,011 | 0,00731 | 1 |
| NATSUME_RESPONSE_TO_INTERFERON_BETA  | -0,093 | 0,011 | 0,04068 | 1 |
| chr1p33                              | 0,093  | 0,011 | 0,24026 | 1 |
| HEMOPOIETIC_OR_LYMPHOID_ORGAN_DEVELC | -0,093 | 0,011 | 0,00744 | 1 |
| RAMJAUN_APOPTOSIS_BY_TGFB1_VIA_MAPK  | 0,093  | 0,011 | 0,30257 | 1 |
| MORF_PDCD1                           | -0,093 | 0,011 | 0,00311 | 1 |
| SESTO_RESPONSE_TO_UV_C1              | -0,093 | 0,011 | 0,31696 | 1 |
| ALONSO_METASTASIS_UP                 | -0,093 | 0,011 | 0,0296  | 1 |
| AKT_UP.V1_UP                         | -0,093 | 0,011 | 0,06541 | 1 |
| chr20q13                             | -0,093 | 0,011 | 0,00667 | 1 |
| V\$ETS_Q4                            | -0,093 | 0,011 | 0,00193 | 1 |
| PID_INTEGRIN_A9B1_PATHWAY            | -0,093 | 0,011 | 0,04906 | 1 |
| TTGGAGA,MIR-515-5P,MIR-519E          | -0,093 | 0,011 | 0,00343 | 1 |
| IGLESIAS_E2F_TARGETS_UP              | -0,093 | 0,011 | 0,00066 | 1 |
| REGULATION_OF_PROTEIN_AMINO_ACID_PHO | -0,093 | 0,011 | 0,00674 | 1 |
| VANTVEER_BREAST_CANCER_METASTASIS_U  | 0,093  | 0,011 | 0,54461 | 1 |
| GSE20366_TREG_VS_NAIVE_CD4_TCELL_DE  | -0,093 | 0,011 | 0,00122 | 1 |
| T_CELL_PROLIFERATION                 | -0,093 | 0,011 | 0,03036 | 1 |
| NEUROPEPTIDE_SIGNALING_PATHWAY       | -0,093 | 0,011 | 0,0086  | 1 |
| YAGI_AML_FAB_MARKERS                 | -0,093 | 0,011 | 0,01419 | 1 |
| GSE13411_IGM_MEMORY_BCELL_VS_PLASMA/ | -0,093 | 0,011 | 0,0008  | 1 |
| ZHANG_RESPONSE_TO_IKK_INHIBITOR_AND_ | -0,093 | 0,011 | 0,08019 | 1 |
| RAS_GTPASE_ACTIVATOR_ACTIVITY        | -0,093 | 0,011 | 0,00796 | 1 |
| ZHAN_MULTIPLE_MYELOMA_HP_DN          | -0,093 | 0,011 | 0,04327 | 1 |
| CCCNNNNNNAAGWT_UNKNOWN               | -0,093 | 0,011 | 0,00022 | 1 |
| GSE17721_CTRL_VS_GARDIQUIMOD_12H_BM  | -0,093 | 0,011 | 0,01343 | 1 |
| V\$NRF1_Q6                           | -0,093 | 0,011 | 0,00019 | 1 |
| GCM_MAX                              | -0,093 | 0,011 | 0,03982 | 1 |
| GSE3982_BCELL_VS_TH1_UP              | -0,093 | 0,011 | 0,00038 | 1 |
| BROWNE_HCMV_INFECTION_10HR_DN        | -0,093 | 0,011 | 0,01032 | 1 |
| MODULE_78                            | 0,093  | 0,011 | 0,27829 | 1 |
| GSE24142_EARLY_THYMIC_PROGENITOR_VS_ | -0,093 | 0,011 | 0,00565 | 1 |
| chr15q22                             | -0,093 | 0,011 | 0,00021 | 1 |
| GCTCTTG,MIR-335                      | -0,093 | 0,011 | 0,00138 | 1 |
| ACTIN_FILAMENT_BASED_PROCESS         | -0,093 | 0,011 | 0,00016 | 1 |

|                                       |        |       |         |   |
|---------------------------------------|--------|-------|---------|---|
| LIN_TUMOR_ESCAPE_FROM_IMMUNE_ATTACK   | -0,093 | 0,011 | 0,06014 | 1 |
| VERRECCHIA_EARLY_RESPONSE_TO_TGFB1    | -0,093 | 0,011 | 0,00102 | 1 |
| ATCMNTCCGY_UNKNOWN                    | -0,093 | 0,011 | 0,00133 | 1 |
| TCTAGAG,MIR-517                       | -0,093 | 0,011 | 0,01281 | 1 |
| REACTOME_METABOLISM_OF_PORPHYRINS     | 0,093  | 0,011 | 0,02253 | 1 |
| GSE10325_CD4_TCELL_VS_LUPUS_CD4_TCE   | -0,093 | 0,011 | 0,06167 | 1 |
| GSE9650_NAIVE_VS_MEMORY_CD8_TCELL_L   | -0,093 | 0,011 | 0,00486 | 1 |
| LINDGREN_BLADDER_CANCER_CLUSTER_2B    | -0,093 | 0,011 | 0,00154 | 1 |
| GTGACTT,MIR-224                       | -0,093 | 0,011 | 0,00228 | 1 |
| MORF_PPP2CA                           | -0,093 | 0,011 | 0,29097 | 1 |
| TAGHAVI_NEOPLASTIC_TRANSFORMATION     | -0,093 | 0,011 | 0,00105 | 1 |
| GSE360_LOW_DOSE_B_MALAYI_VS_M_TUBE    | -0,093 | 0,011 | 0,01735 | 1 |
| POSITIVE_REGULATION_OF_LYMPHOCYTE_AC  | -0,093 | 0,011 | 0,01688 | 1 |
| UDP_GLYCOSYLTRANSFERASE_ACTIVITY      | -0,093 | 0,011 | 0,02468 | 1 |
| MORF_BNIP1                            | -0,093 | 0,011 | 0,00145 | 1 |
| DARWICHE_PAPILLOMA_RISK_LOW_DN        | -0,093 | 0,011 | 0,00177 | 1 |
| SIG_PIP3_SIGNALING_IN_B_LYMPHOCYTES   | -0,093 | 0,012 | 0,01036 | 1 |
| GSE7460_TREG_VS_TCONV_ACT_WITH_TGFI   | -0,092 | 0,012 | 0,00032 | 1 |
| MORF_SART1                            | -0,092 | 0,012 | 0,07078 | 1 |
| GSE13485_DAY3_VS_DAY21_YF17D_VACCII   | -0,092 | 0,012 | 0,02486 | 1 |
| ZHU_CMV_24_HR_DN                      | -0,092 | 0,012 | 0,00034 | 1 |
| GHANDHI_DIRECT_IRRADIATION_DN         | -0,092 | 0,012 | 0,00121 | 1 |
| TGCTTTG,MIR-330                       | -0,092 | 0,012 | 0,00257 | 1 |
| WAKASUGI_HAVE_ZNF143_BINDING_SITES    | -0,092 | 0,012 | 0,02256 | 1 |
| SENESE_HDAC3_TARGETS_UP               | -0,092 | 0,012 | 0,04513 | 1 |
| GSE22886_IGM_MEMORY_BCELL_VS_BLOOD_   | -0,092 | 0,012 | 0,00173 | 1 |
| GCM_USP6                              | -0,092 | 0,012 | 0,0004  | 1 |
| REACTOME_EXTENSION_OF_TELOMERES       | -0,092 | 0,012 | 0,03665 | 1 |
| REACTOME_PECAM1_INTERACTIONS          | -0,092 | 0,012 | 0,03851 | 1 |
| GSE10239_MEMORY_VS_DAY4.5_EFF_CD8_1   | -0,092 | 0,012 | 0,22024 | 1 |
| HOFMANN_CELL_LYMPHOMA_UP              | -0,092 | 0,012 | 0,06012 | 1 |
| SERVITJA_LIVER_HNF1A_TARGETS_DN       | -0,092 | 0,012 | 0,00018 | 1 |
| GCATTTG,MIR-105                       | -0,092 | 0,012 | 0,00837 | 1 |
| GSE2706_UNSTIM_VS_2H_LPS_AND_R848_I   | -0,092 | 0,012 | 0,00053 | 1 |
| BIOCARTA_BCR_PATHWAY                  | -0,092 | 0,012 | 0,00459 | 1 |
| GSE9988_LPS_VS_VEHICLE_TREATED_MONO   | -0,092 | 0,012 | 0,05158 | 1 |
| LINDSTEDT_DENDRITIC_CELL_MATURATION_E | -0,092 | 0,012 | 0,0322  | 1 |
| XU_CREBBP_TARGETS_UP                  | -0,092 | 0,012 | 0,05008 | 1 |
| TOMIDA_METASTASIS_DN                  | -0,092 | 0,012 | 0,11784 | 1 |
| NEGATIVE_REGULATION_OF_CATALYTIC_ACT  | -0,092 | 0,012 | 0,00193 | 1 |
| NIKOLSKY_BREAST_CANCER_21Q22_AMPLICI  | -0,092 | 0,012 | 0,05074 | 1 |
| CHEMELLO_SOLEUS_VS_EDL_MYOFIBERS_DN   | -0,092 | 0,012 | 0,00021 | 1 |

|                                      |        |       |         |   |
|--------------------------------------|--------|-------|---------|---|
| REACTOME_CYCLIN_E_ASSOCIATED_EVENTS_ | -0,092 | 0,012 | 0,24467 | 1 |
| ACEVEDO_LIVER_CANCER_WITH_H3K9ME3_L  | -0,092 | 0,012 | 0,00046 | 1 |
| GSE13411_NAIVE_BCELL_VS_PLASMA_CELL  | -0,092 | 0,012 | 0,00182 | 1 |
| GSE17721_0.5H_VS_12H_CPG_BMDM_UP     | -0,092 | 0,012 | 0,01176 | 1 |
| TRNA_METABOLIC_PROCESS               | -0,092 | 0,012 | 0,71242 | 1 |
| KRIGE_AMINO_ACID_DEPRIVATION         | -0,092 | 0,012 | 0,25991 | 1 |
| DAVICIONI_MOLECULAR_ARMS_VS_ERMS_DN  | -0,092 | 0,012 | 0,00042 | 1 |
| GSE2197_CPG_DNA_VS_UNTREATED_IN_DC_  | -0,092 | 0,012 | 0,00945 | 1 |
| MIKKELSEN_DEDIFFERENTIATED_STATE_DN  | -0,092 | 0,012 | 0,00072 | 1 |
| CROONQUIST_STROMAL_STIMULATION_DN    | -0,092 | 0,012 | 0,05433 | 1 |
| GSE3337_CTRL_VS_4H_IFNG_IN_CD8POS_DC | -0,092 | 0,012 | 0,00263 | 1 |
| REACTOME_POST_TRANSLATIONAL_PROTEIN_ | -0,092 | 0,012 | 0,0404  | 1 |
| ROZANOV_MMP14_TARGETS_UP             | -0,092 | 0,012 | 0,002   | 1 |
| SMALL_CONJUGATING_PROTEIN_BINDING    | -0,092 | 0,012 | 0,03715 | 1 |
| WANG_MLL_TARGETS                     | -0,092 | 0,012 | 0,00033 | 1 |
| KAECH_DAY8_EFF_VS_DAY15_EFF_CD8_TCF  | -0,092 | 0,012 | 0,0003  | 1 |
| GSE17721_CTRL_VS_POLYIC_4H_BMDM_DN   | -0,092 | 0,012 | 0,00197 | 1 |
| GSE17721_0.5H_VS_24H_LPS_BMDM_UP     | -0,092 | 0,012 | 0,00193 | 1 |
| YANG_BREAST_CANCER_ESR1_UP           | 0,092  | 0,012 | 0,42708 | 1 |
| GSE2706_R848_VS_R848_AND_LPS_2H_STI  | -0,092 | 0,012 | 0,06187 | 1 |
| REACTOME_APC_C_CDH1_MEDIATED_DEGRAI  | -0,092 | 0,012 | 0,32379 | 1 |
| REACTOME_SIGNALING_BY_FGFR1_MUTANTS  | -0,092 | 0,012 | 0,01631 | 1 |
| GSE18791_UNSTIM_VS_NEWCATSLE_VIRUS_  | -0,092 | 0,012 | 0,01489 | 1 |
| CHEMOKINE_ACTIVITY                   | -0,092 | 0,012 | 0,05785 | 1 |
| MORF_HDAC1                           | -0,092 | 0,012 | 0,23132 | 1 |
| GSE17721_CTRL_VS_GARDIQUIMOD_2H_BME  | -0,092 | 0,012 | 0,01325 | 1 |
| REPRODUCTIVE_PROCESS                 | -0,092 | 0,012 | 0,01513 | 1 |
| GSE12366_NAIVE_VS_MEMORY_BCELL_UP    | -0,092 | 0,012 | 0,00073 | 1 |
| GSE9037_CTRL_VS_LPS_1H_STIM_BMDM_DN  | -0,092 | 0,012 | 0,00154 | 1 |
| PID_TXA2PATHWAY                      | -0,092 | 0,012 | 0,00875 | 1 |
| MACLACHLAN_BRCA1_TARGETS_UP          | -0,092 | 0,012 | 0,02952 | 1 |
| GSE17721_0.5H_VS_12H_CPG_BMDM_DN     | -0,092 | 0,012 | 0,01648 | 1 |
| ZHANG_GATA6_TARGETS_UP               | -0,092 | 0,012 | 0,00349 | 1 |
| GENTILE_UV_HIGH_DOSE_UP              | -0,092 | 0,012 | 0,01605 | 1 |
| MODULE_488                           | -0,092 | 0,012 | 0,10867 | 1 |
| REACTOME_SYNTHESIS_OF_PE             | -0,092 | 0,012 | 0,00651 | 1 |
| REACTOME_GAB1_SIGNALOSOME            | -0,092 | 0,012 | 0,00075 | 1 |
| BERENJENO_ROCK_SIGNALING_NOT_VIA_RHC | -0,092 | 0,012 | 0,02733 | 1 |
| GSE17721_CTRL_VS_LPS_12H_BMDM_UP     | -0,092 | 0,012 | 0,00165 | 1 |
| MATZUK_LUTEAL_GENES                  | -0,092 | 0,012 | 0,00023 | 1 |
| REACTOME_DOWNSTREAM_SIGNALING_EVEN   | -0,092 | 0,012 | 0,13435 | 1 |
| TRANSITION_METAL_ION_BINDING         | -0,092 | 0,012 | 0,00886 | 1 |

|                                       |        |       |         |   |
|---------------------------------------|--------|-------|---------|---|
| STRUCTURAL_CONSTITUENT_OF_RIBOSOME    | -0,092 | 0,012 | 0,00651 | 1 |
| FOSTER_TOLERANT_MACROPHAGE_DN         | -0,092 | 0,012 | 0,0187  | 1 |
| NOJIMA_SFRP2_TARGETS_DN               | -0,091 | 0,012 | 0,06987 | 1 |
| MODULE_145                            | -0,091 | 0,012 | 0,00333 | 1 |
| ROME_INSULIN_TARGETS_IN_MUSCLE_UP     | -0,091 | 0,012 | 0,08053 | 1 |
| ACEVEDO_METHYLATED_IN_LIVER_CANCER_I  | -0,091 | 0,013 | 0,00025 | 1 |
| REACTOME_GLUCOSE_TRANSPORT            | -0,091 | 0,013 | 0,10561 | 1 |
| MATZUK_SPERMATID_DIFFERENTIATION      | -0,091 | 0,013 | 0,01527 | 1 |
| V\$CDP_01                             | -0,091 | 0,013 | 0,00017 | 1 |
| WU_ALZHEIMER_DISEASE_DN               | -0,091 | 0,013 | 0,00026 | 1 |
| ENZYME_INHIBITOR_ACTIVITY             | -0,091 | 0,013 | 0,00119 | 1 |
| ST_DIFFERENTIATION_PATHWAY_IN_PC12_CI | -0,091 | 0,013 | 0,00041 | 1 |
| GSE17721_POLYIC_VS_PAM3CSK4_8H_BMDI   | -0,091 | 0,013 | 0,08001 | 1 |
| NEUROTRANSMITTER_BINDING              | -0,091 | 0,013 | 0,00911 | 1 |
| chr2q35                               | -0,091 | 0,013 | 0,0359  | 1 |
| GSE15930_NAIVE_VS_72H_IN_VITRO_STIM_  | -0,091 | 0,013 | 0,00015 | 1 |
| GEISS_RESPONSE_TO_DSRNA_UP            | -0,091 | 0,013 | 0,02357 | 1 |
| chr8q21                               | -0,091 | 0,013 | 0,0262  | 1 |
| MILI_PSEUDOPODIA_HAPTOTAXIS_DN        | -0,091 | 0,013 | 0,02787 | 1 |
| PID_WNT_NONCANONICAL_PATHWAY          | -0,091 | 0,013 | 0,01788 | 1 |
| RTTTNNNYTGGM_UNKNOWN                  | -0,091 | 0,013 | 0,00365 | 1 |
| GGGGCCC,MIR-296                       | -0,091 | 0,013 | 0,00331 | 1 |
| MTOR_UP.N4.V1_UP                      | -0,091 | 0,013 | 0,2724  | 1 |
| UZONYI_RESPONSE_TO_LEUKOTRIENE_AND_1  | -0,091 | 0,013 | 0,00066 | 1 |
| REACTOME_SHC1_EVENTS_IN_EGFR_SIGNALII | -0,091 | 0,013 | 0,16565 | 1 |
| HAN_SATB1_TARGETS_DN                  | -0,091 | 0,013 | 0,03236 | 1 |
| CATION_BINDING                        | -0,091 | 0,013 | 0,00472 | 1 |
| GSE15750_WT_VS_TRAF6KO_DAY6_EFF_CD    | -0,091 | 0,013 | 0,00028 | 1 |
| SULFOTRANSFERASE_ACTIVITY             | -0,091 | 0,013 | 0,02414 | 1 |
| ZEMBUTSU_SENSITIVITY_TO_VINCRIStINE   | -0,091 | 0,013 | 0,0916  | 1 |
| GSE11924_TH1_VS_TH17_CD4_TCELL_DN     | -0,091 | 0,013 | 0,00122 | 1 |
| INTERLEUKIN_2_PRODUCTION              | -0,091 | 0,013 | 0,03427 | 1 |
| GSE2706_2H_VS_8H_R848_STIM_DC_DN      | -0,091 | 0,013 | 0,0689  | 1 |
| CAFFAREL_RESPONSE_TO_THC_24HR_5_UP    | -0,091 | 0,013 | 0,38121 | 1 |
| PEPTIDASE_ACTIVITY                    | -0,091 | 0,013 | 0,00803 | 1 |
| PID_PI3KCIPATHWAY                     | -0,091 | 0,013 | 0,01335 | 1 |
| ZHANG_BREAST_CANCER_PROGENITORS_DN    | -0,091 | 0,013 | 0,00175 | 1 |
| HOMEOSTATIC_PROCESS                   | -0,091 | 0,013 | 0,00352 | 1 |
| GSE3982_DC_VS_NEUTROPHIL_UP           | -0,091 | 0,013 | 0,07167 | 1 |
| GSE14308_TH1_VS_NATURAL_TREG_UP       | -0,091 | 0,013 | 0,00063 | 1 |
| BIOCARTA_IL2_PATHWAY                  | -0,091 | 0,013 | 0,0129  | 1 |
| V\$IK2_01                             | -0,091 | 0,013 | 0,00054 | 1 |

|                                                         |        |       |         |   |
|---------------------------------------------------------|--------|-------|---------|---|
| MODULE_115                                              | -0,091 | 0,013 | 0,03754 | 1 |
| ZHANG_TARGETS_OF_EWSR1_FLI1_FUSION                      | -0,091 | 0,013 | 0,00029 | 1 |
| HASINA_NOL7_TARGETS_UP                                  | -0,091 | 0,013 | 0,04298 | 1 |
| PHOSPHOLIPASE_ACTIVITY                                  | -0,091 | 0,013 | 0,0175  | 1 |
| TGTGTGA,MIR-377                                         | -0,091 | 0,013 | 0,00071 | 1 |
| CHEMOKINE_RECEPTOR_BINDING                              | -0,091 | 0,013 | 0,0585  | 1 |
| REACTOME_CLASS_I_MHC_MEDIATED_ANTIGEN_PRESENTATION      | -0,091 | 0,013 | 0,1834  | 1 |
| TAKEDA_TARGETS_OF_NUP98_HOXA9_FUSION                    | -0,091 | 0,013 | 0,00566 | 1 |
| ZHU_CMV_ALL_DN                                          | -0,091 | 0,013 | 0,00032 | 1 |
| ZWANG_TRANSIENTLY_UP_BY_1ST_EGF_PULSED_CULTURE          | -0,091 | 0,013 | 0,00044 | 1 |
| SA_G1_AND_S_PHASES                                      | -0,091 | 0,013 | 0,02059 | 1 |
| PEREZ_TP53_TARGETS                                      | -0,091 | 0,013 | 0,00013 | 1 |
| GSE17580_UNINFECTED_VS_S_MANSONI_INFECTED               | -0,091 | 0,013 | 0,00992 | 1 |
| LY_AGING_OLD_UP                                         | -0,091 | 0,013 | 0,02777 | 1 |
| MORF_AP3D1                                              | -0,091 | 0,013 | 0,52684 | 1 |
| WANG_TUMOR_INVASIVENESS_DN                              | -0,091 | 0,013 | 0,04844 | 1 |
| MODULE_27                                               | -0,091 | 0,013 | 0,0028  | 1 |
| BIOCARTA_TGFB_PATHWAY                                   | -0,091 | 0,013 | 0,00816 | 1 |
| KEGG_ARRHYTHMOGENIC_RIGHT_VENTRICULAR_CONDUCTION_SYSTEM | -0,091 | 0,013 | 0,00023 | 1 |
| ROSS_AML_WITH_AML1_ETO_FUSION                           | -0,091 | 0,013 | 0,00157 | 1 |
| REACTOME_CLASS_B_2_SECRETIN_FAMILY_RECEPTORS            | -0,091 | 0,013 | 0,00329 | 1 |
| DAVICIONI_PAX_FOXO1_SIGNATURE_IN_ARMED_TUMORS           | -0,091 | 0,013 | 0,0007  | 1 |
| BIOCARTA_IL7_PATHWAY                                    | -0,091 | 0,013 | 0,00651 | 1 |
| WATANABE_COLON_CANCER_MSI_VS_MSS_L                      | 0,091  | 0,013 | 0,3152  | 1 |
| LIEN_BREAST_CARCINOMA_METAPLASTIC                       | -0,091 | 0,013 | 0,00066 | 1 |
| GSE17721_CTRL_VS_GARDIQUIMOD_0.5H_BMDM                  | -0,091 | 0,013 | 0,01197 | 1 |
| BURTON_ADIPOGENESIS_8                                   | -0,091 | 0,013 | 0,00715 | 1 |
| GSE9988_ANTI_TREM1_VS_ANTI_TREM1_ANTIBODY               | -0,091 | 0,013 | 0,06908 | 1 |
| KINETOCHORE                                             | -0,091 | 0,013 | 0,08346 | 1 |
| RESPONSE_TO_HYPOXIA                                     | -0,09  | 0,013 | 0,0789  | 1 |
| GSE27786_LIN_NEG_VS_CD8_TCELL_DN                        | -0,09  | 0,014 | 0,00188 | 1 |
| chrXq22                                                 | -0,09  | 0,014 | 0,00197 | 1 |
| GSE17721_LPS_VS_POLYIC_2H_BMDM_UP                       | -0,09  | 0,014 | 0,00886 | 1 |
| GSE3982_CTRL_VS_IGE_STIM_MAST_CELL_L                    | -0,09  | 0,014 | 0,00277 | 1 |
| GSE17721_0.5H_VS_8H_POLYIC_BMDM_UP                      | -0,09  | 0,014 | 0,02552 | 1 |
| GSE22886_NEUTROPHIL_VS_MONOCYTE_DN                      | -0,09  | 0,014 | 0,14595 | 1 |
| MAINTENANCE_OF_LOCALIZATION                             | -0,09  | 0,014 | 0,0852  | 1 |
| SASSON_FSH_RESPONSE                                     | -0,09  | 0,014 | 0,00051 | 1 |
| NIELSEN_LEIOMYOSARCOMA_UP                               | -0,09  | 0,014 | 0,05908 | 1 |
| REACTOME_RAF_MAP_KINASE_CASCADE                         | -0,09  | 0,014 | 0,08236 | 1 |
| MORF_CASP2                                              | -0,09  | 0,014 | 0,00043 | 1 |
| GSE339_EX_VIVO_VS_IN_CULTURE_CD4POS                     | -0,09  | 0,014 | 0,00662 | 1 |



|                                        |       |       |         |   |
|----------------------------------------|-------|-------|---------|---|
| TRANSMEMBRANE_TRANSPORTER_ACTIVITY     | -0,09 | 0,014 | 0,00032 | 1 |
| MORF_FANCG                             | -0,09 | 0,014 | 0,00188 | 1 |
| REGULATION_OF_MUSCLE_CONTRACTION       | -0,09 | 0,014 | 0,00557 | 1 |
| ACTTTAT,MIR-142-5P                     | -0,09 | 0,014 | 0,00019 | 1 |
| HUANG_FOXA2_TARGETS_DN                 | -0,09 | 0,014 | 0,05502 | 1 |
| MORF_EIF3S6                            | -0,09 | 0,014 | 0,06036 | 1 |
| FONTAINE_PAPILLARY_THYROID_CARCI       | -0,09 | 0,014 | 0,05983 | 1 |
| REACTOME_DNA_REPAIR                    | -0,09 | 0,014 | 0,02494 | 1 |
| GOLDRATH_HOMEOSTATIC_PROLIFERATION     | -0,09 | 0,014 | 0,06455 | 1 |
| GSE17721_CTRL_VS_POLYIC_4H_BMDM_UP     | -0,09 | 0,014 | 0,02585 | 1 |
| GSE17721_POLYIC_VS_CPG_12H_BMDM_UP     | -0,09 | 0,014 | 0,00443 | 1 |
| CREIGHTON_ENDOCRINE_THERAPY_RESISTAN   | 0,09  | 0,014 | 0,08539 | 1 |
| POSITIVE_REGULATION_OF_T_CELL_ACTIVAT  | -0,09 | 0,014 | 0,02167 | 1 |
| GAVIN_IL2_RESPONSIVE_FOXP3_TARGETS_DI  | -0,09 | 0,014 | 0,12637 | 1 |
| GSE30962_ACUTE_VS_CHRONIC_LCMV_SECC    | -0,09 | 0,014 | 0,00022 | 1 |
| GSE12366_PLASMA_CELL_VS_MEMORY_BCEI    | -0,09 | 0,014 | 0,01299 | 1 |
| CYTOPLASMIC_PART                       | -0,09 | 0,014 | 0,00128 | 1 |
| METHYLTRANSFERASE_ACTIVITY             | -0,09 | 0,014 | 0,04346 | 1 |
| PROTEIN_SERINE_THREONINE_TYROSINE_KINA | -0,09 | 0,014 | 0,29076 | 1 |
| BONE_REMODELING                        | -0,09 | 0,014 | 0,01128 | 1 |
| HEIDENBLAD_AMPLIFIED_IN_BONE_CANCER    | -0,09 | 0,014 | 0,02549 | 1 |
| GSE29618_BCELL_VS_PDC_DN               | -0,09 | 0,014 | 0,01816 | 1 |
| TSUTSUMI_FBXW8_TARGETS                 | -0,09 | 0,014 | 0,06228 | 1 |
| MODULE_223                             | -0,09 | 0,014 | 0,0066  | 1 |
| DOANE_BREAST_CANCER_ESR1_UP            | 0,09  | 0,014 | 0,34894 | 1 |
| XU_HGF_TARGETS_INDUCED_BY_AKT1_6HR     | -0,09 | 0,014 | 0,0235  | 1 |
| chr16q21                               | -0,09 | 0,014 | 0,25619 | 1 |
| REACTOME_APC_C_CDC20_MEDIATED_DEGR     | -0,09 | 0,014 | 0,29287 | 1 |
| GSE17721_LPS_VS_GARDIQUIMOD_1H_BMDM    | -0,09 | 0,014 | 0,00289 | 1 |
| BIOCARTA_CREB_PATHWAY                  | -0,09 | 0,014 | 0,00466 | 1 |
| MODULE_156                             | -0,09 | 0,014 | 0,00044 | 1 |
| CAMP_UP.V1_UP                          | -0,09 | 0,014 | 0,03114 | 1 |
| GSE2706_UNSTIM_VS_8H_LPS_AND_R848_I    | -0,09 | 0,014 | 0,06244 | 1 |
| YAGI_AML_RELAPSE_PROGNOSIS             | -0,09 | 0,014 | 0,07915 | 1 |
| GSE17974_0H_VS_2H_IN_VITRO_ACT_CD4_    | -0,09 | 0,014 | 0,02583 | 1 |
| GSE3337_CTRL_VS_16H_IFNG_IN_CD8POS_I   | -0,09 | 0,014 | 0,0328  | 1 |
| GSE18791_CTRL_VS_NEWCASTLE_VIRUS_DC    | -0,09 | 0,014 | 0,0241  | 1 |
| SCHAEFFER_PROSTATE_DEVELOPMENT_48HR    | -0,09 | 0,014 | 0,00053 | 1 |
| SUBSTRATE_SPECIFIC_TRANSPORTER_ACTIVIT | -0,09 | 0,014 | 0,00055 | 1 |
| MODULE_63                              | -0,09 | 0,014 | 0,00136 | 1 |
| REACTOME_ASSEMBLY_OF_THE_PRE_REPLIC/   | -0,09 | 0,014 | 0,41116 | 1 |
| TTTGCAG,MIR-518A-2                     | -0,09 | 0,014 | 0,01069 | 1 |

|                                       |        |       |         |   |
|---------------------------------------|--------|-------|---------|---|
| GSE22886_NAIVE_TCELL_VS_MONOCYTE_UF   | -0,09  | 0,014 | 0,00073 | 1 |
| chr17q25                              | -0,09  | 0,014 | 0,01708 | 1 |
| BIOCARTA_MET_PATHWAY                  | -0,09  | 0,014 | 0,0072  | 1 |
| GSE30083_SP2_VS_SP3_THYMOCYTE_UP      | -0,09  | 0,014 | 0,0011  | 1 |
| HU_GENOTOXIC_DAMAGE_24HR              | -0,09  | 0,014 | 0,28103 | 1 |
| GSE22886_NAIVE_CD4_TCELL_VS_MONOCY    | -0,09  | 0,014 | 0,00085 | 1 |
| MODULE_491                            | -0,09  | 0,014 | 0,02894 | 1 |
| RRNA_PROCESSING                       | -0,09  | 0,015 | 0,08206 | 1 |
| QI_HYPOXIA                            | -0,089 | 0,015 | 0,0642  | 1 |
| V\$FOX_Q2                             | -0,089 | 0,015 | 0,00022 | 1 |
| GSE19825_NAIVE_VS_DAY3_EFF_CD8_TCEL   | -0,089 | 0,015 | 0,08874 | 1 |
| GSE11057_CD4_CENT_MEM_VS_PBMC_UP      | -0,089 | 0,015 | 0,0009  | 1 |
| PID_AMB2_NEUTROPHILS_PATHWAY          | -0,089 | 0,015 | 0,0058  | 1 |
| LIANG_SILENCED_BY_METHYLATION_2       | -0,089 | 0,015 | 0,23174 | 1 |
| GSE24634_NAIVE_CD4_TCELL_VS_DAY5_IL4  | -0,089 | 0,015 | 0,37779 | 1 |
| chr6q14                               | -0,089 | 0,015 | 0,01473 | 1 |
| GSE17721_POLYIC_VS_PAM3CSK4_2H_BMDI   | -0,089 | 0,015 | 0,00383 | 1 |
| SHEPARD_BMYB_MORPHOLINO_UP            | -0,089 | 0,015 | 0,0061  | 1 |
| HIRSCH_CELLULAR_TRANSFORMATION_SIGNA  | -0,089 | 0,015 | 0,07876 | 1 |
| GSE13485_CTRL_VS_DAY21_YF17D_VACCIN   | -0,089 | 0,015 | 0,00016 | 1 |
| GSE9037_CTRL_VS_LPS_4H_STIM_IRAK4_KC  | -0,089 | 0,015 | 0,03963 | 1 |
| KEGG_JAK_STAT_SIGNALING_PATHWAY       | -0,089 | 0,015 | 0,00369 | 1 |
| IMMUNE_SYSTEM_DEVELOPMENT             | -0,089 | 0,015 | 0,00945 | 1 |
| YAMASHITA_LIVER_CANCER_WITH_EPCAM_D   | 0,089  | 0,015 | 0,13784 | 1 |
| CYCLIC_NUCLEOTIDE_PHOSPHODIESTERASE_A | -0,089 | 0,015 | 0,00144 | 1 |
| ZHAN_MULTIPLE_MYELOMA_CD1_UP          | -0,089 | 0,015 | 0,003   | 1 |
| GRANDVAUX_IRF3_TARGETS_DN             | -0,089 | 0,015 | 0,00444 | 1 |
| KORKOLA_EMBRYONAL_CARCINOMA_UP        | -0,089 | 0,015 | 0,10786 | 1 |
| GSE29618_LAIV_VS_TIV_FLU_VACCINE_DAY  | -0,089 | 0,015 | 0,00612 | 1 |
| YTCCCRNNAGGY_UNKNOWN                  | -0,089 | 0,015 | 0,00193 | 1 |
| MORF_RAF1                             | -0,089 | 0,015 | 0,12426 | 1 |
| LINDVALL_IMMORTALIZED_BY_TERT_UP      | -0,089 | 0,015 | 0,00123 | 1 |
| MODULE_524                            | -0,089 | 0,015 | 0,00084 | 1 |
| MISHRA_CARCINOMA_ASSOCIATED_FIBROBLA  | -0,089 | 0,015 | 0,00258 | 1 |
| OLIGOSACCHARYL_TRANSFERASE_COMPLEX    | -0,089 | 0,015 | 0,50275 | 1 |
| NIKOLSKY_BREAST_CANCER_8Q12_Q22_AMI   | -0,089 | 0,015 | 0,05887 | 1 |
| DARWICHE_PAPILLOMA_PROGRESSION_RISK   | -0,089 | 0,015 | 0,00221 | 1 |
| GSE9650_GP33_VS_GP276_LCMV_SPECIFIC_  | -0,089 | 0,015 | 0,00052 | 1 |
| HOQUE_METHYLATED_IN_CANCER            | -0,089 | 0,015 | 0,00103 | 1 |
| GSE30083_SP1_VS_SP3_THYMOCYTE_DN      | -0,089 | 0,015 | 0,00048 | 1 |
| MODULE_38                             | -0,089 | 0,015 | 0,0034  | 1 |
| KYNG_DNA_DAMAGE_UP                    | -0,089 | 0,015 | 0,00141 | 1 |

|                                       |        |       |         |   |
|---------------------------------------|--------|-------|---------|---|
| REACTOME_ANTIVIRAL_MECHANISM_BY_IFN_  | -0,089 | 0,015 | 0,11201 | 1 |
| ZWANG_EGF_PERSISTENTLY_UP             | -0,089 | 0,015 | 0,19042 | 1 |
| ZHOU_PANCREATIC_ENDOCRINE_PROGENITOR  | 0,089  | 0,015 | 0,06505 | 1 |
| ONO_FOXP3_TARGETS_UP                  | -0,089 | 0,015 | 0,0086  | 1 |
| GLYCOSAMINOGLYCAN_BINDING             | -0,089 | 0,015 | 0,00238 | 1 |
| GSE24142_EARLY_THYMIC_PROGENITOR_VS_  | -0,089 | 0,015 | 0,00037 | 1 |
| DITTMER_PTHLH_TARGETS_DN              | -0,089 | 0,015 | 0,18745 | 1 |
| VERRECCHIA_RESPONSE_TO_TGFB1_C5       | -0,089 | 0,015 | 0,04016 | 1 |
| MODULE_568                            | -0,089 | 0,015 | 0,0422  | 1 |
| PROTEIN_IMPORT                        | -0,089 | 0,015 | 0,1763  | 1 |
| GSE9037_CTRL_VS_LPS_4H_STIM_BMDM_DN   | -0,089 | 0,015 | 0,04971 | 1 |
| MARTENS_TRETINOIN_RESPONSE_DN         | -0,089 | 0,015 | 0,0127  | 1 |
| ZWANG_EGF_INTERVAL_DN                 | -0,089 | 0,015 | 0,00016 | 1 |
| KORKOLA_EMBRYONAL_CARCINOMA           | -0,089 | 0,015 | 0,13385 | 1 |
| WIERENGA_STAT5A_TARGETS_UP            | -0,089 | 0,015 | 0,02024 | 1 |
| JOHNSTONE_PARVB_TARGETS_1_UP          | -0,089 | 0,015 | 0,00118 | 1 |
| GSE31082_DP_VS_CD4_SP_THYMOCYTE_DN    | -0,089 | 0,015 | 0,00238 | 1 |
| CONTRACTILE_FIBER_PART                | -0,089 | 0,015 | 0,00221 | 1 |
| KEGG_VEGF_SIGNALING_PATHWAY           | -0,089 | 0,015 | 0,00421 | 1 |
| RODRIGUES_NTN1_TARGETS_DN             | -0,089 | 0,015 | 0,00399 | 1 |
| REACTOME_TRANSPORT_OF_RIBONUCLEOPRO   | -0,089 | 0,015 | 0,14851 | 1 |
| GROSS_HYPOXIA_VIA_HIF1A_DN            | -0,089 | 0,015 | 0,00883 | 1 |
| TISSUE_REMODELING                     | -0,089 | 0,015 | 0,01171 | 1 |
| 3_5_CYCLIC_NUCLEOTIDE_PHOSPHODIESTER/ | -0,089 | 0,016 | 0,00126 | 1 |
| MODULE_29                             | -0,089 | 0,016 | 0,01002 | 1 |
| CELLULAR_MONOVALENT_INORGANIC_CATIOI  | 0,089  | 0,016 | 0,80612 | 1 |
| GSE22886_NAIVE_BCELL_VS_BM_PLASMA_C   | -0,089 | 0,016 | 0,0024  | 1 |
| BIOCARTA_IL12_PATHWAY                 | -0,089 | 0,016 | 0,0251  | 1 |
| HATADA_METHYLATED_IN_LUNG_CANCER_D    | -0,089 | 0,016 | 0,27497 | 1 |
| REACTOME_METABOLISM_OF_STEROID_HORM   | -0,089 | 0,016 | 0,00479 | 1 |
| PEREZ_TP53_AND_TP63_TARGETS           | -0,089 | 0,016 | 0,00076 | 1 |
| GSE39820_CTRL_VS_IL1B_IL6_CD4_TCELL_  | -0,088 | 0,016 | 0,008   | 1 |
| GSE16522_MEMORY_VS_NAIVE_ANTI_CD3CE   | -0,088 | 0,016 | 0,00357 | 1 |
| GSE11057_PBMC_VS_MEM_CD4_TCELL_DN     | -0,088 | 0,016 | 0,00071 | 1 |
| PEDRIOLI_MIR31_TARGETS_DN             | -0,088 | 0,016 | 0,00021 | 1 |
| AMUNDSON_POOR_SURVIVAL_AFTER_GAMMA/   | -0,088 | 0,016 | 0,0025  | 1 |
| SCHAEFFER_PROSTATE_DEVELOPMENT_6HR_   | -0,088 | 0,016 | 0,00102 | 1 |
| REGULATION_OF_IMMUNE_SYSTEM_PROCESS   | -0,088 | 0,016 | 0,01962 | 1 |
| ZHU_CMV_ALL_UP                        | -0,088 | 0,016 | 0,18287 | 1 |
| GSE22886_IGM_MEMORY_BCELL_VS_BM_PL/   | -0,088 | 0,016 | 0,00489 | 1 |
| PID_TCRRASPATHWAY                     | -0,088 | 0,016 | 0,02098 | 1 |
| DORN_ADENOVIRUS_INFECTIION_12HR_DN    | -0,088 | 0,016 | 0,05282 | 1 |

|                                       |        |       |         |   |
|---------------------------------------|--------|-------|---------|---|
| V\$TTF1_Q6                            | -0,088 | 0,016 | 0,00044 | 1 |
| BIOCARTA_ERYTH_PATHWAY                | -0,088 | 0,016 | 0,00031 | 1 |
| GSE2706_UNSTIM_VS_8H_LPS_AND_R848_I   | -0,088 | 0,016 | 0,0092  | 1 |
| GSE9037_CTRL_VS_LPS_1H_STIM_BMDM_UF   | -0,088 | 0,016 | 0,00189 | 1 |
| MCGARVEY_SILENCED_BY_METHYLATION_IN_  | -0,088 | 0,016 | 0,00061 | 1 |
| HORMONE_SECRETION                     | -0,088 | 0,016 | 0,00705 | 1 |
| GTPASE_ACTIVITY                       | -0,088 | 0,016 | 0,00047 | 1 |
| ELVIDGE_HYPOXIA_BY_DMOG_UP            | -0,088 | 0,016 | 0,09638 | 1 |
| REACTOME_NEPHRIN_INTERACTIONS         | -0,088 | 0,016 | 0,26451 | 1 |
| YAO_TEMPORAL_RESPONSE_TO_PROGESTERC   | -0,088 | 0,016 | 0,00229 | 1 |
| LEIN_CEREBELLUM_MARKERS               | -0,088 | 0,016 | 0,00637 | 1 |
| V\$ISRE_01                            | -0,088 | 0,016 | 0,01039 | 1 |
| KIM_ALL_DISORDERS_OLIGODENDROCYTE_NU  | -0,088 | 0,016 | 0,01303 | 1 |
| MODULE_471                            | -0,088 | 0,016 | 0,28166 | 1 |
| RECEPTOR_ACTIVITY                     | -0,088 | 0,016 | 0,00195 | 1 |
| BROWNE_HCMV_INFECTION_20HR_DN         | -0,088 | 0,016 | 0,00765 | 1 |
| LE_EGR2_TARGETS_DN                    | -0,088 | 0,016 | 0,00033 | 1 |
| ATPASE_ACTIVITY                       | -0,088 | 0,016 | 0,01112 | 1 |
| MULLIGHAN_NPM1_MUTATED_SIGNATURE_1_   | -0,088 | 0,016 | 0,00292 | 1 |
| REACTOME_TRANSFERRIN_ENDOCYTOSIS_ANI  | -0,088 | 0,016 | 0,36301 | 1 |
| GSE15659_CD45RA_NEG_CD4_TCELL_VS_RI   | -0,088 | 0,016 | 0,01508 | 1 |
| MYLLYKANGAS_AMPLIFICATION_HOT_SPOT_2  | -0,088 | 0,016 | 0,04508 | 1 |
| EXOPEPTIDASE_ACTIVITY                 | -0,088 | 0,016 | 0,00192 | 1 |
| PID_RHODOPSIN_PATHWAY                 | -0,088 | 0,016 | 0,04351 | 1 |
| PID_HDAC_CLASSII_PATHWAY              | 0,088  | 0,016 | 0,92684 | 1 |
| GSE11057_NAIVE_VS_EFF_MEMORY_CD4_TC   | -0,088 | 0,016 | 0,03496 | 1 |
| GSE17721_CTRL_VS_LPS_4H_BMDM_DN       | -0,088 | 0,016 | 0,00425 | 1 |
| LIGAND_GATED_CHANNEL_ACTIVITY         | -0,088 | 0,016 | 0,01209 | 1 |
| GOLDRATH_NAIVE_VS_EFF_CD8_TCELL_UP    | -0,088 | 0,016 | 0,00054 | 1 |
| GSE37416_CTRL_VS_24H_F_TULARENSIS_L\  | -0,088 | 0,016 | 0,00722 | 1 |
| REACTOME_IL_3_5_AND_GM_CSF_SIGNALINC  | -0,088 | 0,016 | 0,04448 | 1 |
| GSE360_L_DONOVANI_VS_B_MALAYI_HIGH_   | -0,088 | 0,016 | 0,0439  | 1 |
| REACTOME_P38MAPK_EVENTS               | -0,088 | 0,016 | 0,07832 | 1 |
| MORF_PRKAG1                           | -0,088 | 0,016 | 0,48262 | 1 |
| STARK_HYPPOCAMPUS_22Q11_DELETION_UF   | -0,088 | 0,016 | 0,00911 | 1 |
| GSE7764_NKCELL_VS_SPLENOCYTE_UP       | -0,088 | 0,016 | 0,00152 | 1 |
| GSE17721_POLYIC_VS_CPG_24H_BMDM_UP    | -0,088 | 0,016 | 0,00117 | 1 |
| AMINO_ACID_DERIVATIVE_METABOLIC_PROCI | -0,088 | 0,016 | 0,00195 | 1 |
| V\$STAT5A_04                          | -0,088 | 0,016 | 0,00028 | 1 |
| KENNY_CTNNB1_TARGETS_UP               | -0,088 | 0,016 | 0,18058 | 1 |
| BIOCARTA_PPARA_PATHWAY                | -0,088 | 0,017 | 0,00251 | 1 |
| CYSTEINE_TYPE_ENDOPEPTIDASE_ACTIVITY  | -0,088 | 0,017 | 0,14048 | 1 |

|                                                                               |        |       |         |   |
|-------------------------------------------------------------------------------|--------|-------|---------|---|
| MODULE_361                                                                    | -0,088 | 0,017 | 0,0045  | 1 |
| GSE18791_CTRL_VS_NEWCASTLE_VIRUS_DC                                           | -0,088 | 0,017 | 0,01283 | 1 |
| KEGG_PRIMARY_IMMUNODEFICIENCY                                                 | -0,088 | 0,017 | 0,01887 | 1 |
| GTGCAAT,MIR-25,MIR-32,MIR-92,MIR-363,MIR-IVANOVA_HEMATOPOIESIS_STEM_CELL_SHOF | -0,088 | 0,017 | 0,00338 | 1 |
| GSE7460_WT_VS_FOXP3_HET_ACT_WITH_T                                            | -0,088 | 0,017 | 0,00019 | 1 |
| REACTOME_RNA_POL_II_PRE_TRANSCRIPTION                                         | -0,088 | 0,017 | 0,12442 | 1 |
| GSE10325_LUPUS_CD4_TCELL_VS_LUPUS_B                                           | -0,088 | 0,017 | 0,00249 | 1 |
| PROTEIN_TARGETING                                                             | -0,088 | 0,017 | 0,15329 | 1 |
| GSE17974_IL4_AND_ANTI_IL12_VS_UNTREA                                          | -0,088 | 0,017 | 0,00562 | 1 |
| RORIE_TARGETS_OF_EWSR1_FLI1_FUSION_UI                                         | -0,088 | 0,017 | 0,00189 | 1 |
| TOMLINS_PROSTATE_CANCER_UP                                                    | -0,088 | 0,017 | 0,0009  | 1 |
| TURJANSKI_MAPK8_AND_MAPK9_TARGETS                                             | -0,088 | 0,017 | 0,00477 | 1 |
| GSE14769_UNSTIM_VS_40MIN_LPS_BMDM_L                                           | -0,088 | 0,017 | 0,02233 | 1 |
| GSE17721_12H_VS_24H_CPG_BMDM_UP                                               | -0,088 | 0,017 | 0,00262 | 1 |
| CTTTGCA,MIR-527                                                               | -0,088 | 0,017 | 0,00754 | 1 |
| TGCACTT,MIR-519C,MIR-519B,MIR-519A                                            | -0,088 | 0,017 | 0,00256 | 1 |
| GSE17721_LPS_VS_PAM3CSK4_1H_BMDM_L                                            | -0,088 | 0,017 | 0,01544 | 1 |
| GSE17974_1H_VS_72H_UNTREATED_IN_VIT                                           | -0,088 | 0,017 | 0,01389 | 1 |
| KOHOUTEK_CCNT1_TARGETS                                                        | -0,088 | 0,017 | 0,01108 | 1 |
| KEGG_MISMATCH_REPAIR                                                          | -0,088 | 0,017 | 0,07425 | 1 |
| GCM_RAP2A                                                                     | -0,088 | 0,017 | 0,08003 | 1 |
| SENSORY_PERCEPTION_OF_CHEMICAL_STIMUI                                         | -0,088 | 0,017 | 0,02181 | 1 |
| DNA_HELICASE_ACTIVITY                                                         | -0,088 | 0,017 | 0,04531 | 1 |
| GSE18791_CTRL_VS_NEWCASTLE_VIRUS_DC                                           | -0,087 | 0,017 | 0,00014 | 1 |
| KEGG_CYTOKINE_CYTOKINE_RECEPTOR_INTEF                                         | -0,087 | 0,017 | 0,01351 | 1 |
| APOPTOTIC_PROGRAM                                                             | -0,087 | 0,017 | 0,05675 | 1 |
| KAPOSI_LIVER_CANCER_MET_DN                                                    | 0,087  | 0,017 | 0,08582 | 1 |
| AKL_HTLV1_INFECTIION_DN                                                       | -0,087 | 0,017 | 0,02465 | 1 |
| BUYTAERT_PHOTODYNAMIC_THERAPY_STRES                                           | -0,087 | 0,017 | 0,01484 | 1 |
| DOANE_BREAST_CANCER_CLASSES_UP                                                | 0,087  | 0,017 | 0,5539  | 1 |
| MODULE_521                                                                    | -0,087 | 0,017 | 0,02534 | 1 |
| V\$IK1_01                                                                     | -0,087 | 0,017 | 0,00022 | 1 |
| PID_IL23PATHWAY                                                               | -0,087 | 0,017 | 0,02541 | 1 |
| MA_PITUITARY_FETAL_VS_ADULT_DN                                                | 0,087  | 0,017 | 0,06346 | 1 |
| GARY_CD5_TARGETS_UP                                                           | -0,087 | 0,017 | 0,00741 | 1 |
| GSE22886_NAIVE_CD4_TCELL_VS_NKCELL_                                           | -0,087 | 0,017 | 0,00028 | 1 |
| CHARAFE_BREAST_CANCER_LUMINAL_VS_ME                                           | 0,087  | 0,017 | 0,74601 | 1 |
| MODULE_522                                                                    | -0,087 | 0,017 | 0,07253 | 1 |
| V\$TEF_Q6                                                                     | -0,087 | 0,017 | 0,00065 | 1 |
| V\$HMEF2_Q6                                                                   | -0,087 | 0,017 | 0,00126 | 1 |
| BIOCARTA_EDG1_PATHWAY                                                         | -0,087 | 0,017 | 0,0213  | 1 |

|                                      |        |       |         |   |
|--------------------------------------|--------|-------|---------|---|
| chr9q32                              | -0,087 | 0,017 | 0,00071 | 1 |
| MODULE_511                           | -0,087 | 0,017 | 0,13459 | 1 |
| MODULE_419                           | -0,087 | 0,017 | 0,00255 | 1 |
| chr2q11                              | -0,087 | 0,017 | 0,00019 | 1 |
| GSE9988_ANTI_TREM1_VS_VEHICLE_TREAT  | -0,087 | 0,017 | 0,15104 | 1 |
| PID_TCPTP_PATHWAY                    | -0,087 | 0,017 | 0,04915 | 1 |
| JAZAG_TGFB1_SIGNALING_DN             | -0,087 | 0,017 | 0,00337 | 1 |
| DACOSTA_UV_RESPONSE_VIA_ERCC3_COMM   | -0,087 | 0,017 | 0,05062 | 1 |
| ACTIVATION_OF_JNK_ACTIVITY           | -0,087 | 0,017 | 0,02627 | 1 |
| PICCALUGA_ANGIOIMMUNOBLASTIC_LYMPHOM | -0,087 | 0,017 | 0,00065 | 1 |
| GSE7460_TREG_VS_TCONV_ACT_UP         | -0,087 | 0,017 | 0,00924 | 1 |
| SHIPP_DLBCL_VS_FOLLICULAR_LYMPHOMA_L | -0,087 | 0,017 | 0,49158 | 1 |
| ENK_UV_RESPONSE_KERATINOCYTE_UP      | -0,087 | 0,017 | 0,04369 | 1 |
| MODULE_139                           | 0,087  | 0,017 | 0,64048 | 1 |
| ATGCTGC,MIR-103,MIR-107              | -0,087 | 0,017 | 0,00124 | 1 |
| YANG_BCL3_TARGETS_DN                 | -0,087 | 0,017 | 0,0015  | 1 |
| MORF_ARL3                            | -0,087 | 0,017 | 0,00116 | 1 |
| KEGG_PROANOATE_METABOLISM            | 0,087  | 0,017 | 0,0435  | 1 |
| REGULATION_OF_PROTEIN_IMPORT_INTO_NU | -0,087 | 0,017 | 0,08268 | 1 |
| MORF_UNG                             | -0,087 | 0,017 | 0,43834 | 1 |
| GAUSSMANN_MLL_AF4_FUSION_TARGETS_A   | -0,087 | 0,017 | 0,00157 | 1 |
| KRAS.BREAST_UP.V1_DN                 | -0,087 | 0,018 | 0,00038 | 1 |
| BRUINS_UVC_RESPONSE_VIA_TP53_GROUP_E | -0,087 | 0,018 | 0,00189 | 1 |
| MOREIRA_RESPONSE_TO_TSA_DN           | -0,087 | 0,018 | 0,01004 | 1 |
| REACTOME_SCFSKP2_MEDIATED_DEGRADATI  | -0,087 | 0,018 | 0,44193 | 1 |
| CGTSACG_V\$PAX3_B                    | -0,087 | 0,018 | 0,0024  | 1 |
| GSE360_DC_VS_MAC_L_DONOVANI_UP       | -0,087 | 0,018 | 0,01534 | 1 |
| PID_VEGFR1_2_PATHWAY                 | -0,087 | 0,018 | 0,04628 | 1 |
| KAYO_CALORIE_RESTRICTION_MUSCLE_UP   | -0,087 | 0,018 | 0,00158 | 1 |
| KAECH_DAY15_EFF_VS_MEMORY_CD8_TCELL  | -0,087 | 0,018 | 0,01646 | 1 |
| GSE22886_CD8_TCELL_VS_BCELL_NAIVE_D  | -0,087 | 0,018 | 0,0096  | 1 |
| chryq11                              | 0,087  | 0,018 | 0,0083  | 1 |
| ENDORIBONUCLEASE_ACTIVITY            | -0,087 | 0,018 | 0,52571 | 1 |
| MODULE_1                             | -0,087 | 0,018 | 0,0002  | 1 |
| LIANG_HEMATOPOIESIS_STEM_CELL_NUMBER | -0,087 | 0,018 | 0,00742 | 1 |
| GSE339_EX_VIVO_VS_IN_CULTURE_CD8POS  | -0,087 | 0,018 | 0,01496 | 1 |
| HERNANDEZ_MITOTIC_ARREST_BY_DOCETAXI | -0,087 | 0,018 | 0,00407 | 1 |
| JI_RESPONSE_TO_FSH_UP                | -0,087 | 0,018 | 0,0259  | 1 |
| KEGG_GLYCOSAMINOGLYCAN_BIOSYNTHESIS  | -0,087 | 0,018 | 0,26967 | 1 |
| PHOSPHORIC_MONOESTER_HYDROLASE_ACTI  | -0,087 | 0,018 | 0,00066 | 1 |
| PID_IL4_2PATHWAY                     | -0,087 | 0,018 | 0,00187 | 1 |
| GSE32423_IL7_VS_IL7_IL4_MEMORY_CD8_T | -0,087 | 0,018 | 0,00593 | 1 |

|                                        |        |       |         |   |
|----------------------------------------|--------|-------|---------|---|
| GSE22886_NAIVE_BCELL_VS_BLOOD_PLASM    | -0,087 | 0,018 | 0,00038 | 1 |
| GSE17974_CTRL_VS_ACT_IL4_AND_ANTI_IL   | -0,087 | 0,018 | 0,00081 | 1 |
| ACACTGG,MIR-199A,MIR-199B              | -0,087 | 0,018 | 0,00049 | 1 |
| ZHANG_TLX_TARGETS_DN                   | -0,087 | 0,018 | 0,0011  | 1 |
| PID_AR_NONGENOMIC_PATHWAY              | -0,087 | 0,018 | 0,00462 | 1 |
| chr3q13                                | -0,087 | 0,018 | 0,00457 | 1 |
| HONMA_DOCETAXEL_RESISTANCE             | -0,087 | 0,018 | 0,43523 | 1 |
| MEK_UP.V1_UP                           | -0,087 | 0,018 | 0,06828 | 1 |
| REACTOME_NOTCH_HLH_TRANSCRIPTION_PA    | -0,087 | 0,018 | 0,01478 | 1 |
| PETRETTO_HEART_MASS_QTL_CIS_DN         | -0,087 | 0,018 | 0,01396 | 1 |
| chr4p14                                | -0,087 | 0,018 | 0,03832 | 1 |
| REACTOME_INWARDLY_RECTIFYING_K_CHANI   | -0,087 | 0,018 | 0,00209 | 1 |
| GSE30962_PRIMARY_VS_SECONDARY_ACUTE    | -0,087 | 0,018 | 0,00326 | 1 |
| SCHLOSSER_MYC_TARGETS_REPRESSED_BY_!   | -0,087 | 0,018 | 0,50885 | 1 |
| MODULE_257                             | -0,087 | 0,018 | 0,00085 | 1 |
| RADMACHER_AML_PROGNOSIS                | -0,087 | 0,018 | 0,0045  | 1 |
| KEGG_CHEMOKINE_SIGNALING_PATHWAY       | -0,086 | 0,018 | 0,02213 | 1 |
| BYSTRYKH_HEMATOPOIESIS_STEM_CELL_RUN   | -0,086 | 0,018 | 0,00233 | 1 |
| GSE31082_DP_VS_CD8_SP_THYMOCYTE_DN     | -0,086 | 0,018 | 0,00015 | 1 |
| FINAK_BREAST_CANCER_SDPP_SIGNATURE     | -0,086 | 0,018 | 0,00105 | 1 |
| GSE20366_TREG_VS_TCONV_DN              | -0,086 | 0,018 | 0,00385 | 1 |
| REACTOME_SIGNALING_BY_INSULIN_RECEPTO  | -0,086 | 0,018 | 0,00179 | 1 |
| GSE20366_TREG_VS_NAIVE_CD4_TCELL_HO    | -0,086 | 0,018 | 0,00253 | 1 |
| GSE18148_CFBF_KO_VS_WT_TREG_UP         | -0,086 | 0,018 | 0,00032 | 1 |
| GSE17721_POLYIC_VS_PAM3CSK4_6H_BMDI    | -0,086 | 0,018 | 0,01859 | 1 |
| GSE29617_CTRL_VS_DAY3_TIV_FLU_VACCI    | -0,086 | 0,018 | 0,00293 | 1 |
| BUKANOVICH_T_LYMPHOCYTE_HOMING_ON_     | -0,086 | 0,018 | 0,00027 | 1 |
| MILI_PSEUDOPODIA_CHEMOTAXIS_DN         | -0,086 | 0,018 | 0,01592 | 1 |
| POSITIVE_REGULATION_OF_MULTICELLULAR_  | -0,086 | 0,018 | 0,01707 | 1 |
| MODULE_71                              | -0,086 | 0,018 | 0,00219 | 1 |
| ST_P38_MAPK_PATHWAY                    | -0,086 | 0,018 | 0,00377 | 1 |
| PEPTIDE_METABOLIC_PROCESS              | -0,086 | 0,018 | 0,00222 | 1 |
| ZWANG_EGF_PERSISTENTLY_DN              | -0,086 | 0,018 | 0,00134 | 1 |
| 3_5_EXONUCLEASE_ACTIVITY               | -0,086 | 0,018 | 0,09803 | 1 |
| MODULE_256                             | -0,086 | 0,018 | 0,00022 | 1 |
| MODULE_562                             | -0,086 | 0,018 | 0,15259 | 1 |
| PID_ARF6DOWNSTREAMPATHWAY              | -0,086 | 0,019 | 0,14838 | 1 |
| RASHI_RESPONSE_TO_IONIZING_RADIATION_! | -0,086 | 0,019 | 0,05264 | 1 |
| GSE17721_LPS_VS_PAM3CSK4_6H_BMDM_L     | -0,086 | 0,019 | 0,19002 | 1 |
| MATZUK_SPERMATOGONIA                   | -0,086 | 0,019 | 0,00059 | 1 |
| TONKS_TARGETS_OF_RUNX1_RUNX1T1_FUSI    | -0,086 | 0,019 | 0,00094 | 1 |
| chr6q                                  | -0,086 | 0,019 | 0,12398 | 1 |

|                                      |        |       |         |   |
|--------------------------------------|--------|-------|---------|---|
| ATAGGAA,MIR-202                      | -0,086 | 0,019 | 0,00242 | 1 |
| GSE22886_TH1_VS_TH2_12H_ACT_DN       | -0,086 | 0,019 | 0,00173 | 1 |
| CORTICAL_CYTOSKELETON                | 0,086  | 0,019 | 0,0781  | 1 |
| YAGI_AML_WITH_T_8_21_TRANSLOCATION   | -0,086 | 0,019 | 0,00516 | 1 |
| OKAMOTO_LIVER_CANCER_MULTICENTRIC_OC | -0,086 | 0,019 | 0,00312 | 1 |
| KRAS.AMP.LUNG_UP.V1_DN               | -0,086 | 0,019 | 0,00031 | 1 |
| VECCHI_GASTRIC_CANCER_ADVANCED_VS_E  | -0,086 | 0,019 | 0,01247 | 1 |
| JAZAG_TGFB1_SIGNALING_VIA_SMAD4_UP   | -0,086 | 0,019 | 0,00993 | 1 |
| chr16q23                             | 0,086  | 0,019 | 0,0075  | 1 |
| HORTON_SREBF_TARGETS                 | -0,086 | 0,019 | 0,28962 | 1 |
| RODWELL_AGING_KIDNEY_DN              | -0,086 | 0,019 | 0,00082 | 1 |
| REACTOME_REGULATION_OF_MRNA_STABILIT | -0,086 | 0,019 | 0,41462 | 1 |
| GSE9650_EFFECTOR_VS_EXHAUSTED_CD8_T  | -0,086 | 0,019 | 0,00078 | 1 |
| GSE3982_CTRL_VS_LPS_4H_MAC_UP        | -0,086 | 0,019 | 0,01599 | 1 |
| RAHMAN_TP53_TARGETS_PHOSPHORYLATED   | -0,086 | 0,019 | 0,73572 | 1 |
| NAGASHIMA_EGF_SIGNALING_UP           | -0,086 | 0,019 | 0,00016 | 1 |
| MORF_TFDP2                           | -0,086 | 0,019 | 0,00064 | 1 |
| GSE29618_LAIV_VS_TIV_FLU_VACCINE_DAY | -0,086 | 0,019 | 0,0048  | 1 |
| ZHAN_MULTIPLE_MYELOMA_UP             | -0,086 | 0,019 | 0,04146 | 1 |
| GSE22886_NAIVE_TCELL_VS_NKCELL_DN    | -0,086 | 0,019 | 0,0489  | 1 |
| REGULATION_OF_TRANSFORMING_GROWTH_F  | -0,086 | 0,019 | 0,00014 | 1 |
| GOLGI_MEMBRANE                       | 0,086  | 0,019 | 0,09053 | 1 |
| GSE14308_TH17_VS_NATURAL_TREG_DN     | -0,086 | 0,019 | 0,00219 | 1 |
| GSE17721_0.5H_VS_8H_POLYIC_BMDM_DN   | -0,086 | 0,019 | 0,00721 | 1 |
| GSE3982_BCELL_VS_NKCELL_UP           | -0,086 | 0,019 | 0,01919 | 1 |
| MAHAJAN_RESPONSE_TO_IL1A_UP          | -0,086 | 0,019 | 0,00684 | 1 |
| HSIAO_HOUSEKEEPING_GENES             | -0,086 | 0,019 | 0,02853 | 1 |
| GSE360_HIGH_VS_LOW_DOSE_B_MALAYI_M   | -0,086 | 0,019 | 0,0058  | 1 |
| GSE17974_2H_VS_72H_UNTREATED_IN_VIT  | -0,086 | 0,019 | 0,03553 | 1 |
| REACTOME_POL_SWITCHING               | -0,086 | 0,019 | 0,07223 | 1 |
| GSE22886_NAIVE_CD4_TCELL_VS_NKCELL_  | -0,086 | 0,019 | 0,05429 | 1 |
| LEIN_MEDULLA_MARKERS                 | -0,086 | 0,019 | 0,00282 | 1 |
| KRIGE_RESPONSE_TO_TOSEDOSTAT_6HR_UP  | -0,086 | 0,019 | 0,0243  | 1 |
| PID_CXCR3PATHWAY                     | -0,086 | 0,019 | 0,05617 | 1 |
| GSE33513_TCF7_KO_VS_HET_EARLY_THYMI  | -0,086 | 0,019 | 0,0016  | 1 |
| RECEPTOR_COMPLEX                     | -0,086 | 0,019 | 0,00504 | 1 |
| GSE360_DC_VS_MAC_B_MALAYI_LOW_DOSE   | -0,086 | 0,019 | 0,00961 | 1 |
| GNF2_EGFR                            | -0,086 | 0,019 | 0,01987 | 1 |
| V\$NKX22_01                          | -0,086 | 0,019 | 0,00015 | 1 |
| ZHOU_INFLAMMATORY_RESPONSE_LIVE_DN   | -0,086 | 0,019 | 0,00091 | 1 |
| WANG_SMARCE1_TARGETS_UP              | -0,086 | 0,019 | 0,00452 | 1 |
| IL21_UP.V1_DN                        | -0,086 | 0,019 | 0,00042 | 1 |



|                                      |        |       |         |   |
|--------------------------------------|--------|-------|---------|---|
| ROY_WOUND_BLOOD_VESSEL_UP            | -0,086 | 0,019 | 0,01547 | 1 |
| KUNINGER_IGF1_VS_PDGF_TARGETS_DN     | -0,086 | 0,019 | 0,01117 | 1 |
| REACTOME_CREB_PHOSPHORYLATION_THROU  | -0,086 | 0,019 | 0,01589 | 1 |
| REACTOME_UNFOLDED_PROTEIN_RESPONSE   | -0,086 | 0,019 | 0,37318 | 1 |
| KLEIN_PRIMARY EFFUSION_LYMPHOMA_UP   | -0,086 | 0,019 | 0,05525 | 1 |
| OUELLET_OVARIAN_CANCER_INVASIVE_VS_L | -0,086 | 0,019 | 0,99334 | 1 |
| GSE20366_TREG_VS_NAIVE_CD4_TCELL_DN  | -0,086 | 0,019 | 0,00514 | 1 |
| GSE20715_0H_VS_48H_OZONE_TLR4_KO_L   | -0,086 | 0,019 | 0,00018 | 1 |
| GSE13484_12H_VS_3H_YF17D_VACCINE_ST  | -0,086 | 0,02  | 0,01339 | 1 |
| PID_IL8CXCR1_PATHWAY                 | -0,086 | 0,02  | 0,02743 | 1 |
| STAMBOLSKY_RESPONSE_TO_VITAMIN_D3_D  | -0,086 | 0,02  | 0,0365  | 1 |
| V\$LFA1_Q6                           | -0,086 | 0,02  | 0,00054 | 1 |
| ALONSO_METASTASIS_DN                 | -0,086 | 0,02  | 0,04063 | 1 |
| CAR_WBSCR22                          | -0,085 | 0,02  | 0,00963 | 1 |
| SHIN_B_CELL_LYMPHOMA_CLUSTER_2       | -0,085 | 0,02  | 0,00813 | 1 |
| TAVOR_CEBPA_TARGETS_UP               | -0,085 | 0,02  | 0,05169 | 1 |
| GSE24142_EARLY_THYMIC_PROGENITOR_VS_ | -0,085 | 0,02  | 0,01457 | 1 |
| BOYLAN_MULTIPLE_MYELOMA_C_CLUSTER_D  | -0,085 | 0,02  | 0,00832 | 1 |
| PID_ERBB1_RECEPTOR_PROXIMAL_PATHWAY  | -0,085 | 0,02  | 0,10957 | 1 |
| MORF_RPA1                            | -0,085 | 0,02  | 0,57495 | 1 |
| GSE360_L_DONOVANI_VS_M_TUBERCULOSIS  | -0,085 | 0,02  | 0,02251 | 1 |
| GSE17721_CTRL_VS_POLYIC_8H_BMDM_DN   | -0,085 | 0,02  | 0,00176 | 1 |
| GSE13306_RA_VS_UNTREATED_TCONV_UP    | -0,085 | 0,02  | 0,00023 | 1 |
| MODULE_211                           | -0,085 | 0,02  | 0,13399 | 1 |
| GSE3982_MEMORY_CD4_TCELL_VS_BCELL_I  | -0,085 | 0,02  | 0,03156 | 1 |
| GAJATE_RESPONSE_TO TRABECTEDIN_UP    | -0,085 | 0,02  | 0,03274 | 1 |
| GCM_PPM1D                            | -0,085 | 0,02  | 0,0151  | 1 |
| GSE3982_CTRL_VS_PMA_STIM_EOSINOPHIL_ | -0,085 | 0,02  | 0,00756 | 1 |
| MARKEY_RB1_CHRONIC_LOF_DN            | -0,085 | 0,02  | 0,06583 | 1 |
| GSE12845_NAIVE_VS_DARKZONE_GC_TONSI  | -0,085 | 0,02  | 0,00255 | 1 |
| FURUKAWA_DUSP6_TARGETS_PCI35_UP      | -0,085 | 0,02  | 0,01397 | 1 |
| TCTGATC,MIR-383                      | 0,085  | 0,02  | 0,07926 | 1 |
| ORGANELLE_LOCALIZATION               | -0,085 | 0,02  | 0,05994 | 1 |
| GNF2_PPP6C                           | -0,085 | 0,02  | 0,21104 | 1 |
| chr3q21                              | -0,085 | 0,02  | 0,03898 | 1 |
| KAECH_NAIVE_VS_DAY15_EFF_CD8_TCELL_  | -0,085 | 0,02  | 0,03265 | 1 |
| GSE17721_POLYIC_VS_GARDIQUIMOD_2H_BI | -0,085 | 0,02  | 0,00023 | 1 |
| FAELT_B_CLL_WITH_VH3_21_UP           | -0,085 | 0,02  | 0,08388 | 1 |
| BIOCARTA_HSP27_PATHWAY               | -0,085 | 0,02  | 0,00886 | 1 |
| GSE10239_NAIVE_VS_MEMORY_CD8_TCELL_  | -0,085 | 0,02  | 0,08796 | 1 |
| TCCCCAC,MIR-491                      | -0,085 | 0,02  | 0,00074 | 1 |
| KEGG_SULFUR_METABOLISM               | 0,085  | 0,02  | 0,05282 | 1 |

|                                       |        |       |         |   |
|---------------------------------------|--------|-------|---------|---|
| BIOCARTA_PAR1_PATHWAY                 | -0,085 | 0,02  | 0,00392 | 1 |
| MODULE_388                            | -0,085 | 0,02  | 0,20526 | 1 |
| DAVICIONI_RHABDOMYOSARCOMA_PAX_FOXC   | -0,085 | 0,02  | 0,06307 | 1 |
| GSE7460_TREG_VS_TCONV_ACT_DN          | -0,085 | 0,02  | 0,00044 | 1 |
| KIM_GASTRIC_CANCER_CHEMOSENSITIVITY   | -0,085 | 0,02  | 0,00241 | 1 |
| V\$RREB1_01                           | -0,085 | 0,02  | 0,00254 | 1 |
| REACTOME_RNA_POL_III_CHAIN_ELONGATION | -0,085 | 0,02  | 0,09439 | 1 |
| GSE360_CTRL_VS_M_TUBERCULOSIS_DC_UP   | -0,085 | 0,02  | 0,00245 | 1 |
| MCDOWELL_ACUTE_LUNG_INJURY_DN         | -0,085 | 0,02  | 0,00013 | 1 |
| chr13q32                              | -0,085 | 0,02  | 0,04972 | 1 |
| ATP_DEPENDENT_HELICASE_ACTIVITY       | -0,085 | 0,02  | 0,17625 | 1 |
| CONCANNON_APOPTOSIS_BY_EPOXOMICIN_UI  | -0,085 | 0,02  | 0,01875 | 1 |
| V\$CEBP_Q2                            | -0,085 | 0,02  | 0,00323 | 1 |
| GSE20715_WT_VS_TLR4_KO_24H_OZONE_L    | -0,085 | 0,02  | 0,00061 | 1 |
| GSE13484_12H_UNSTIM_VS_YF17D_VACCIN   | -0,085 | 0,02  | 0,04271 | 1 |
| REACTOME_G_ALPHA1213_SIGNALLING_EVEI  | -0,085 | 0,02  | 0,0024  | 1 |
| GSE26669_CD4_VS_CD8_TCELL_IN_MLR_CC   | -0,085 | 0,02  | 0,00814 | 1 |
| WIERENGA_STAT5A_TARGETS_GROUP1        | -0,085 | 0,021 | 0,02176 | 1 |
| MMS_MOUSE_LYMPH_HIGH_4HRS_UP          | -0,085 | 0,021 | 0,19384 | 1 |
| NEGATIVE_REGULATION_OF_RESPONSE_TO_S  | -0,085 | 0,021 | 0,03327 | 1 |
| CCGNMNTNACG_UNKNOWN                   | -0,085 | 0,021 | 0,01357 | 1 |
| GSE27786_LSK_VS_BCELL_DN              | -0,085 | 0,021 | 0,01823 | 1 |
| REACTOME_METABOLISM_OF_NUCLEOTIDES    | -0,085 | 0,021 | 0,23537 | 1 |
| DER_IFN_BETA_RESPONSE_DN              | -0,085 | 0,021 | 0,01796 | 1 |
| DE_YY1_TARGETS_DN                     | -0,085 | 0,021 | 0,06689 | 1 |
| CHIARADONNA_NEOPLASTIC_TRANSFORMATI   | -0,085 | 0,021 | 0,00248 | 1 |
| GSE22886_NAIVE_VS_IGM_MEMORY_BCELL__  | -0,085 | 0,021 | 0,05622 | 1 |
| PID_INTEGRIN2_PATHWAY                 | -0,085 | 0,021 | 0,01044 | 1 |
| GTACTGT,MIR-101                       | -0,085 | 0,021 | 0,00169 | 1 |
| GSE7460_CTRL_VS_TGFB_TREATED_ACT_CI   | -0,085 | 0,021 | 0,00521 | 1 |
| POOLA_INVASIVE_BREAST_CANCER_UP       | -0,085 | 0,021 | 0,0853  | 1 |
| POTTI_PACLITAXEL_SENSITIVITY          | -0,085 | 0,021 | 0,01542 | 1 |
| REACTOME_PLATELET_ACTIVATION_SIGNALIN | -0,085 | 0,021 | 0,00193 | 1 |
| GNF2_NS                               | -0,085 | 0,021 | 0,40276 | 1 |
| REGULATION_OF_T_CELL_PROLIFERATION    | -0,085 | 0,021 | 0,04791 | 1 |
| GSE22886_NAIVE_CD8_TCELL_VS_MONOCY    | -0,085 | 0,021 | 0,00485 | 1 |
| TAKEDA_TARGETS_OF_NUP98_HOXA9_FUSIC   | -0,085 | 0,021 | 0,00094 | 1 |
| GNF2_SERPINI2                         | -0,085 | 0,021 | 0,04642 | 1 |
| RAFFEL_VEGFA_TARGETS_DN               | -0,085 | 0,021 | 0,32139 | 1 |
| GSE339_EX_VIVO_VS_IN_CULTURE_CD4CD8I  | -0,085 | 0,021 | 0,03568 | 1 |
| NUCLEOLAR_PART                        | -0,085 | 0,021 | 0,24546 | 1 |
| WINTER_HYPOXIA_METAGENE               | -0,085 | 0,021 | 0,05528 | 1 |

|                                          |        |       |         |   |
|------------------------------------------|--------|-------|---------|---|
| GTP_BINDING                              | -0,085 | 0,021 | 0,01512 | 1 |
| GSE20715_WT_VS_TLR4_KO_LUNG_UP           | -0,085 | 0,021 | 0,00509 | 1 |
| GSE17721_LPS_VS_POLYIC_6H_BMDM_DN        | -0,085 | 0,021 | 0,05104 | 1 |
| HAEGERSTRAND_RESPONSE_TO_IMATINIB        | -0,085 | 0,021 | 0,00031 | 1 |
| GSE17721_LPS_VS_GARDIQUIMOD_12H_BMC      | -0,084 | 0,021 | 0,00742 | 1 |
| PID_FANCONI_PATHWAY                      | -0,084 | 0,021 | 0,06316 | 1 |
| MCDOWELL_ACUTE_LUNG_INJURY_UP            | -0,084 | 0,021 | 0,02253 | 1 |
| SMID_BREAST_CANCER_LUMINAL_B_UP          | 0,084  | 0,021 | 0,3858  | 1 |
| BIOCARTA_GABA_PATHWAY                    | -0,084 | 0,021 | 0,16856 | 1 |
| BIOCARTA_GPCR_PATHWAY                    | -0,084 | 0,021 | 0,0036  | 1 |
| GSE29614_DAY3_VS_DAY7_TIV_FLU_VACCI      | -0,084 | 0,021 | 0,00036 | 1 |
| chr6p24                                  | -0,084 | 0,021 | 0,07    | 1 |
| REACTOME_CTLA4_INHIBITORY_SIGNALING      | -0,084 | 0,021 | 0,14121 | 1 |
| RAMASWAMY_METASTASIS_DN                  | -0,084 | 0,021 | 0,00066 | 1 |
| BASSO_CD40_SIGNALING_DN                  | -0,084 | 0,021 | 0,00783 | 1 |
| ZHOU_INFLAMMATORY_RESPONSE_LPS_UP        | -0,084 | 0,021 | 0,00973 | 1 |
| MILICIC_FAMILIAL_ADENOMATOUS_POLYPOSI    | -0,084 | 0,021 | 0,36693 | 1 |
| GSE17974_1H_VS_72H_UNTREATED_IN_VIT      | -0,084 | 0,021 | 0,13801 | 1 |
| RB_P130_DN.V1_DN                         | -0,084 | 0,021 | 0,15166 | 1 |
| MODULE_133                               | -0,084 | 0,021 | 0,88608 | 1 |
| GSE10325_LUPUS_CD4_TCELL_VS_LUPUS_B      | -0,084 | 0,021 | 0,03323 | 1 |
| GSE11924_TH1_VS_TH2_CD4_TCELL_DN         | -0,084 | 0,021 | 0,00597 | 1 |
| CASORELLI_ACUTE_PROMYELOCYTIC_LEUKEM     | -0,084 | 0,021 | 0,00131 | 1 |
| GSE17721_12H_VS_24H_GARDIQUIMOD_BMI      | -0,084 | 0,021 | 0,04507 | 1 |
| REACTOME_IL_2_SIGNALING                  | -0,084 | 0,021 | 0,03893 | 1 |
| GSE3982_MAST_CELL_VS_BASOPHIL_DN         | -0,084 | 0,021 | 0,0013  | 1 |
| KINSEY_TARGETS_OF_EWSR1_FLI1_FUSION_D    | -0,084 | 0,021 | 0,0002  | 1 |
| SANSOM_APC_MYC_TARGETS                   | -0,084 | 0,021 | 0,0035  | 1 |
| STEGMEIER_PRE-MITOTIC_CELL_CYCLE_REGUL   | -0,084 | 0,021 | 0,01617 | 1 |
| GSE18791_CTRL_VS_NEWCASTLE_VIRUS_DC      | -0,084 | 0,022 | 0,00029 | 1 |
| SANA_TNF_SIGNALING_DN                    | -0,084 | 0,022 | 0,00052 | 1 |
| GSE14308_TH1_VS_NAIVE_CD4_TCELL_UP       | -0,084 | 0,022 | 0,01608 | 1 |
| KRAS.PROSTATE_UP.V1_DN                   | -0,084 | 0,022 | 0,02334 | 1 |
| TURASHVILI_BREAST_LOBULAR_CARCINOMA_     | -0,084 | 0,022 | 0,00541 | 1 |
| chr2q36                                  | -0,084 | 0,022 | 0,02846 | 1 |
| LASTOWSKA_NEUROBLASTOMA_COPY_NUMB        | -0,084 | 0,022 | 0,05439 | 1 |
| GSE17721_CTRL_VS_LPS_24H_BMDM_UP         | -0,084 | 0,022 | 0,00089 | 1 |
| GCACTTT,MIR-17-5P,MIR-20A,MIR-106A,MIR-1 | -0,084 | 0,022 | 0,00599 | 1 |
| GSE360_CTRL_VS_B_MALAYI_LOW_DOSE_M       | -0,084 | 0,022 | 0,01177 | 1 |
| KEGG_ADIPOCYTOKINE_SIGNALING_PATHWAY     | -0,084 | 0,022 | 0,00045 | 1 |
| REGULATION_OF_BIOLOGICAL_QUALITY         | -0,084 | 0,022 | 0,00071 | 1 |
| GSE9988_ANTI_TREM1_VS_CTRL_TREATED_      | -0,084 | 0,022 | 0,04866 | 1 |

|                                        |        |       |         |   |
|----------------------------------------|--------|-------|---------|---|
| CHARAFE_BREAST_CANCER_LUMINAL_VS_BA    | 0,084  | 0,022 | 0,2674  | 1 |
| ST_T_CELL_SIGNAL_TRANSDUCTION          | -0,084 | 0,022 | 0,01823 | 1 |
| GSE10325_CD4_TCELL_VS_BCELL_DN         | -0,084 | 0,022 | 0,02356 | 1 |
| CERAMIDE_METABOLIC_PROCESS             | 0,084  | 0,022 | 0,1415  | 1 |
| GSE13229_IMM_VS_MATURE_NKCELL_DN       | -0,084 | 0,022 | 0,00248 | 1 |
| HOSHIDA_LIVER_CANCER_SUBCLASS_S1       | -0,084 | 0,022 | 0,03963 | 1 |
| HOFFMAN_CLOCK_TARGETS_DN               | -0,084 | 0,022 | 0,02084 | 1 |
| GSE26669_CD4_VS_CD8_TCELL_IN_MLR_DN    | -0,084 | 0,022 | 0,00198 | 1 |
| PID_IL3_PATHWAY                        | -0,084 | 0,022 | 0,01984 | 1 |
| GSE15750_DAY6_VS_DAY10_EFF_CD8_TCEI    | -0,084 | 0,022 | 0,00015 | 1 |
| LEE_LIVER_CANCER_E2F1_DN               | -0,084 | 0,022 | 0,13987 | 1 |
| BIOCARTA_RAS_PATHWAY                   | -0,084 | 0,022 | 0,06072 | 1 |
| GSE17721_CTRL_VS_CPG_4H_BMDM_UP        | -0,084 | 0,022 | 0,00167 | 1 |
| RRNA_METABOLIC_PROCESS                 | -0,084 | 0,022 | 0,15103 | 1 |
| ZHANG_TLX_TARGETS_60HR_UP              | -0,084 | 0,022 | 0,00035 | 1 |
| GNF2_GLTSCR2                           | -0,084 | 0,022 | 0,00738 | 1 |
| REACTOME_YAP1_AND_WWTR1_TAZ_STIMUL     | -0,084 | 0,022 | 0,03846 | 1 |
| CHESLER_BRAIN_QTL_CIS                  | -0,084 | 0,022 | 0,00034 | 1 |
| BIOCARTA_PLCE_PATHWAY                  | -0,084 | 0,022 | 0,00314 | 1 |
| GSE17974_2H_VS_72H_UNTREATED_IN_VIT    | -0,084 | 0,022 | 0,10171 | 1 |
| SMID_BREAST_CANCER_RELAPSE_IN_LIVER_L  | -0,084 | 0,022 | 0,26158 | 1 |
| REACTOME_XENOBIOTICS                   | 0,084  | 0,022 | 0,12669 | 1 |
| PHOSPHOINOSITIDE_METABOLIC_PROCESS     | 0,084  | 0,022 | 0,06443 | 1 |
| DNA_REPLICATION_INITIATION             | -0,084 | 0,022 | 0,14665 | 1 |
| GSE18791_UNSTIM_VS_NEWCATSLE_VIRUS_    | -0,084 | 0,022 | 0,00038 | 1 |
| HALMOS_CEBPA_TARGETS_DN                | -0,084 | 0,022 | 0,00033 | 1 |
| GSE1448_CTRL_VS_ANTI_VBETA5_DP_THYM    | -0,084 | 0,022 | 0,004   | 1 |
| CORTICAL_ACTIN_CYTOSKELETON            | 0,084  | 0,022 | 0,07667 | 1 |
| TNCATNTCCYR_UNKNOWN                    | -0,084 | 0,022 | 0,00133 | 1 |
| PRC1_BMI_UP.V1_UP                      | -0,084 | 0,022 | 0,00174 | 1 |
| GSE22886_CD8_TCELL_VS_BCELL_NAIVE_UI   | -0,084 | 0,022 | 0,00782 | 1 |
| ZHOU_INFLAMMATORY_RESPONSE_LIVE_UP     | -0,084 | 0,022 | 0,0059  | 1 |
| IKEDA_MIR1_TARGETS_UP                  | -0,084 | 0,022 | 0,06694 | 1 |
| LIU_CMYB_TARGETS_UP                    | -0,084 | 0,022 | 0,00447 | 1 |
| RECEPTOR_SIGNALING_PROTEIN_SERINE_THRI | -0,084 | 0,022 | 0,0295  | 1 |
| GSE22886_NAIVE_VS_IGG_IGA_MEMORY_BCI   | -0,084 | 0,022 | 0,05227 | 1 |
| chr2p13                                | -0,084 | 0,023 | 0,0622  | 1 |
| chr2q23                                | -0,084 | 0,023 | 0,00515 | 1 |
| PAPASPYRIDONOS_UNSTABLE_ATEROSCLERO    | -0,084 | 0,023 | 0,00061 | 1 |
| GACAATC,MIR-219                        | -0,084 | 0,023 | 0,00053 | 1 |
| REACTOME_SLC_MEDIATED_TRANSMEMBRANI    | -0,084 | 0,023 | 0,04655 | 1 |
| VANHARANTA_UTERINE_FIBROID_DN          | -0,084 | 0,023 | 0,00041 | 1 |

|                                          |        |       |         |   |
|------------------------------------------|--------|-------|---------|---|
| CELLULAR_RESPONSE_TO_EXTRACELLULAR_      | -0,084 | 0,023 | 0,04314 | 1 |
| GSE13738_RESTING_VS_BYSTANDER_ACTIV/     | -0,084 | 0,023 | 0,07295 | 1 |
| GSE16522_MEMORY_VS_NAIVE_ANTI_CD3CD      | -0,084 | 0,023 | 0,03512 | 1 |
| FIGUEROA_AML_METHYLATION_CLUSTER_5_I     | -0,083 | 0,023 | 0,00222 | 1 |
| GSE20715_WT_VS_TLR4_KO_6H_OZONE_LL       | -0,083 | 0,023 | 0,00022 | 1 |
| HAMAI_APOPTOSIS_VIA_TRAIL_DN             | -0,083 | 0,023 | 0,03514 | 1 |
| MONOCARBOXYLIC_ACID_METABOLIC_PROCES     | -0,083 | 0,023 | 0,00024 | 1 |
| GSE22886_CD4_TCELL_VS_BCELL_NAIVE_UI     | -0,083 | 0,023 | 0,0047  | 1 |
| NEWMAN_ERCC6_TARGETS_UP                  | -0,083 | 0,023 | 0,09427 | 1 |
| DELACROIX_RARG_BOUND_MEF                 | -0,083 | 0,023 | 0,002   | 1 |
| MODULE_418                               | -0,083 | 0,023 | 0,00866 | 1 |
| GSE3982_CTRL_VS_LPS_48H_DC_DN            | -0,083 | 0,023 | 0,05759 | 1 |
| GSE6269_FLU_VS_STREP_PNEUMO_INF_PBM      | -0,083 | 0,023 | 0,00045 | 1 |
| CHARAFE_BREAST_CANCER_BASAL_VS_MESI      | -0,083 | 0,023 | 0,00466 | 1 |
| ZHAN_MULTIPLE_MYELOMA_CD2_UP             | -0,083 | 0,023 | 0,01253 | 1 |
| SENSORY_PERCEPTION_OF_TASTE              | -0,083 | 0,023 | 0,02632 | 1 |
| GSE11057_CD4_EFF_MEM_VS_PBMC_UP          | -0,083 | 0,023 | 0,00036 | 1 |
| HOFFMANN_PRE_BI_TO_LARGE_PRE_BII_LYMI    | -0,083 | 0,023 | 0,00897 | 1 |
| GSE20366_EX_VIVO_VS_HOMEOSTATIC_CON      | -0,083 | 0,023 | 0,00363 | 1 |
| AAGTCCA,MIR-422B,MIR-422A                | -0,083 | 0,023 | 0,00489 | 1 |
| PAL_PRMT5_TARGETS_DN                     | -0,083 | 0,023 | 0,00773 | 1 |
| AACATTC,MIR-409-3P                       | -0,083 | 0,023 | 0,0024  | 1 |
| GSE12845_IGD_POS_BLOOD_VS_DARKZONE_      | -0,083 | 0,023 | 0,00049 | 1 |
| TRACEY_RESISTANCE_TO_IFNA2_DN            | -0,083 | 0,023 | 0,02137 | 1 |
| GROSS_HYPOXIA_VIA_ELK3_AND_HIF1A_UP      | -0,083 | 0,023 | 0,02541 | 1 |
| KEGG_HEDGEHOG_SIGNALING_PATHWAY          | -0,083 | 0,023 | 0,0017  | 1 |
| POSITIVE_REGULATION_OF_T_CELL_PROLIFEF   | -0,083 | 0,023 | 0,04944 | 1 |
| FUNG_IL2_SIGNALING_2                     | -0,083 | 0,023 | 0,04711 | 1 |
| GSE17721_PAM3CSK4_VS_GADIQUIMOD_1H_      | -0,083 | 0,023 | 0,0035  | 1 |
| VALK_AML_CLUSTER_9                       | -0,083 | 0,023 | 0,01349 | 1 |
| GRADE_METASTASIS_DN                      | -0,083 | 0,023 | 0,40866 | 1 |
| MODULE_408                               | 0,083  | 0,023 | 0,06971 | 1 |
| BARIS_THYROID_CANCER_DN                  | -0,083 | 0,023 | 0,00697 | 1 |
| GSE17721_CTRL_VS_LPS_2H_BMDM_UP          | -0,083 | 0,023 | 0,01469 | 1 |
| REACTOME_IL_RECEPTOR_SHC_SIGNALING       | -0,083 | 0,024 | 0,04109 | 1 |
| AMIT_SERUM_RESPONSE_40_MCF10A            | -0,083 | 0,024 | 0,00243 | 1 |
| GSE3982_CTRL_VS_LPS_4H_MAC_DN            | -0,083 | 0,024 | 0,05673 | 1 |
| AGCACTT,MIR-93,MIR-302A,MIR-302B,MIR-302 | -0,083 | 0,024 | 0,00764 | 1 |
| CHUANG_OXIDATIVE_STRESS_RESPONSE_UP      | -0,083 | 0,024 | 0,03302 | 1 |
| ANATOMICAL_STRUCTURE_FORMATION           | -0,083 | 0,024 | 0,01021 | 1 |
| SCHLOSSER_MYC_AND_SERUM_RESPONSE_SY      | -0,083 | 0,024 | 0,09251 | 1 |
| KOKKINAKIS_METHIONINE_DEPRIVATION_96H    | -0,083 | 0,024 | 0,00362 | 1 |

|                                       |        |       |         |   |
|---------------------------------------|--------|-------|---------|---|
| BIOCARTA_ERK5_PATHWAY                 | -0,083 | 0,024 | 0,00425 | 1 |
| GSE17721_LPS_VS_GARDIQUIMOD_12H_BMDM  | -0,083 | 0,024 | 0,18937 | 1 |
| ZHENG_FOXP3_TARGETS_IN_T_LYMPHOCYTE   | -0,083 | 0,024 | 0,00246 | 1 |
| GSE17721_CPG_VS_GARDIQUIMOD_4H_BMDM   | -0,083 | 0,024 | 0,02049 | 1 |
| HOLLEMAN_DAUNORUBICIN_B_ALL_UP        | -0,083 | 0,024 | 0,05962 | 1 |
| REGULATION_OF_LYMPHOCYTE_ACTIVATION   | -0,083 | 0,024 | 0,03128 | 1 |
| GSE17721_LPS_VS_PAM3CSK4_12H_BMDM     | -0,083 | 0,024 | 0,18557 | 1 |
| GSE13485_DAY1_VS_DAY7_YF17D_VACCINI   | -0,083 | 0,024 | 0,00031 | 1 |
| GSE7852_TREG_VS_TCONV_THYMUS_UP       | -0,083 | 0,024 | 0,00575 | 1 |
| DELASERNA_TARGETS_OF_MYOD_AND_SMAF    | -0,083 | 0,024 | 0,00323 | 1 |
| SMID_BREAST_CANCER_RELAPSE_IN_BRAIN_I | 0,083  | 0,024 | 0,1816  | 1 |
| PRC2_EDD_UP.V1_DN                     | -0,083 | 0,024 | 0,01006 | 1 |
| TCANNTGAY_V\$SREBP1_01                | -0,083 | 0,024 | 0,00031 | 1 |
| GSE339_EX_VIVO_VS_IN_CULTURE_CD4POS   | -0,083 | 0,024 | 0,10064 | 1 |
| CHOI_ATL_CHRONIC_VS_ACUTE_DN          | -0,083 | 0,024 | 0,35762 | 1 |
| KAYO_CALORIE_RESTRICTION_MUSCLE_DN    | -0,083 | 0,024 | 0,02852 | 1 |
| OXFORD_RALB_TARGETS_DN                | -0,083 | 0,024 | 0,94976 | 1 |
| JOHNSTONE_PARVB_TARGETS_2_UP          | -0,083 | 0,024 | 0,00375 | 1 |
| METALLOENDOPEPTIDASE_ACTIVITY         | -0,082 | 0,024 | 0,06581 | 1 |
| V\$HNF4_DR1_Q3                        | -0,082 | 0,024 | 0,00068 | 1 |
| GSE17721_CTRL_VS_CPG_8H_BMDM_UP       | -0,082 | 0,024 | 0,00019 | 1 |
| LUCAS_HNF4A_TARGETS_DN                | -0,082 | 0,025 | 0,02039 | 1 |
| REACTOME_PEPTIDE_HORMONE_BIOSYNTHESI  | -0,082 | 0,025 | 0,04454 | 1 |
| GSE22886_NAIVE_VS_IGG_IGA_MEMORY_BCI  | -0,082 | 0,025 | 0,00038 | 1 |
| GAL_LEUKEMIC_STEM_CELL_DN             | -0,082 | 0,025 | 0,05551 | 1 |
| GSE29618_BCELL_VS_PDC_DAY7_FLU_VAC    | -0,082 | 0,025 | 0,01198 | 1 |
| chr9q31                               | -0,082 | 0,025 | 0,06675 | 1 |
| INWARD_RECTIFIER_POTASSIUM_CHANNEL_A  | -0,082 | 0,025 | 0,02122 | 1 |
| MATZUK_MALE_REPRODUCTION_SERTOLI      | -0,082 | 0,025 | 0,0002  | 1 |
| REACTOME_REGULATION_OF_SIGNALING_BY   | -0,082 | 0,025 | 0,12174 | 1 |
| GSE17721_CPG_VS_GARDIQUIMOD_1H_BMDM   | -0,082 | 0,025 | 0,00048 | 1 |
| GENE_SILENCING                        | -0,082 | 0,025 | 0,14372 | 1 |
| MOTAMED_RESPONSE_TO_ANDROGEN_DN       | -0,082 | 0,025 | 0,08408 | 1 |
| STRESS_ACTIVATED_PROTEIN_KINASE_SIGNA | -0,082 | 0,025 | 0,00428 | 1 |
| HOSHIDA_LIVER_CANCER_SUBCLASS_S2      | -0,082 | 0,025 | 0,02078 | 1 |
| PID_S1P_S1P3_PATHWAY                  | -0,082 | 0,025 | 0,01326 | 1 |
| GSE17721_POLYIC_VS_CPG_2H_BMDM_DN     | -0,082 | 0,025 | 0,01219 | 1 |
| ST_G_ALPHA_I_PATHWAY                  | -0,082 | 0,025 | 0,07233 | 1 |
| ZHONG_SECRETOME_OF_LUNG_CANCER_AND    | -0,082 | 0,025 | 0,2218  | 1 |
| CHANDRAN_METASTASIS_UP                | -0,082 | 0,025 | 0,04168 | 1 |
| CHEMNITZ_RESPONSE_TO_PROSTAGLANDIN_I  | -0,082 | 0,025 | 0,00013 | 1 |
| TRICARBOXYLIC_ACID_CYCLE_INTERMEDIATE | 0,082  | 0,025 | 0,01327 | 1 |

|                                       |        |       |         |   |
|---------------------------------------|--------|-------|---------|---|
| AXON_GUIDANCE                         | -0,082 | 0,025 | 0,0024  | 1 |
| MODULE_169                            | -0,082 | 0,025 | 0,01218 | 1 |
| MODULE_61                             | -0,082 | 0,025 | 0,64797 | 1 |
| GSE7460_TCONV_VS_TREG_LN_DN           | -0,082 | 0,025 | 0,0078  | 1 |
| BERENJENO_ROCK_SIGNALING_NOT_VIA_RHC  | -0,082 | 0,025 | 0,00351 | 1 |
| RHO_GTPASE_ACTIVATOR_ACTIVITY         | -0,082 | 0,025 | 0,00196 | 1 |
| PID_EPOPATHWAY                        | -0,082 | 0,025 | 0,0064  | 1 |
| KASLER_HDAC7_TARGETS_1_UP             | -0,082 | 0,025 | 0,00313 | 1 |
| REACTOME_ERKS_ARE_INACTIVATED         | 0,082  | 0,025 | 0,04414 | 1 |
| GSE17721_PAM3CSK4_VS_GADIQUIMOD_8H    | -0,082 | 0,025 | 0,08152 | 1 |
| MORF_GSPT1                            | -0,082 | 0,026 | 0,40289 | 1 |
| ZHOU_INFLAMMATORY_RESPONSE_FIMA_DN    | -0,082 | 0,026 | 0,00016 | 1 |
| KEGG_ONE_CARBON_POOL_BY_FOLATE        | -0,082 | 0,026 | 0,0757  | 1 |
| G_PROTEIN_COUPLED_RECEPTOR_BINDING    | -0,082 | 0,026 | 0,08014 | 1 |
| GALE_APL_WITH_FLT3_MUTATED_UP         | -0,082 | 0,026 | 0,06056 | 1 |
| DE_YY1_TARGETS_UP                     | -0,082 | 0,026 | 0,00353 | 1 |
| TORCHIA_TARGETS_OF_EWSR1_FLI1_FUSION  | -0,082 | 0,026 | 0,08939 | 1 |
| JNK_CASCADE                           | -0,082 | 0,026 | 0,00478 | 1 |
| MAHADEVAN_IMATINIB_RESISTANCE_DN      | -0,082 | 0,026 | 0,00098 | 1 |
| REACTOME_TRANSMISSION_ACROSS_CHEMIC/  | -0,082 | 0,026 | 0,00113 | 1 |
| REACTOME_RECEPTOR_LIGAND_BINDING_INIT | -0,082 | 0,026 | 0,00677 | 1 |
| REACTOME_GOLGI_ASSOCIATED_VESICLE_BIC | 0,082  | 0,026 | 0,00866 | 1 |
| MODULE_56                             | -0,082 | 0,026 | 0,45636 | 1 |
| V\$OCT1_04                            | -0,082 | 0,026 | 0,00076 | 1 |
| GSE17580_UNINFECTED_VS_S_MANSONI_INF  | -0,082 | 0,026 | 0,10158 | 1 |
| GSE17721_POLYIC_VS_GARDIQUIMOD_6H_BN  | -0,082 | 0,026 | 0,02111 | 1 |
| HUMMERICH_SKIN_CANCER_PROGRESSION_UP  | -0,082 | 0,026 | 0,04734 | 1 |
| REACTOME_GABA_SYNTHESIS_RELEASE_REUF  | 0,082  | 0,026 | 0,11335 | 1 |
| ATTCTTT,MIR-186                       | -0,082 | 0,026 | 0,01484 | 1 |
| ACTGCAG,MIR-17-3P                     | -0,082 | 0,026 | 0,00592 | 1 |
| PID_MYC_REPRESSPATHWAY                | -0,082 | 0,026 | 0,01293 | 1 |
| DACOSTA_UV_RESPONSE_VIA_ERCC3_TTD_L   | -0,082 | 0,026 | 0,02407 | 1 |
| ENDOSOME_TRANSPORT                    | 0,082  | 0,026 | 0,25667 | 1 |
| SCHUETZ_BREAST_CANCER_DUCTAL_INVASIN  | -0,081 | 0,026 | 0,01248 | 1 |
| PID_CD40_PATHWAY                      | -0,081 | 0,026 | 0,01313 | 1 |
| ALK_DN.V1_DN                          | -0,081 | 0,026 | 0,00072 | 1 |
| WATANABE_RECTAL_CANCER_RADIOOTHERAP'  | -0,081 | 0,026 | 0,19144 | 1 |
| BEGUM_TARGETS_OF_PAX3_FOXO1_FUSION_   | -0,081 | 0,026 | 0,00028 | 1 |
| chr11q                                | -0,081 | 0,026 | 0,00133 | 1 |
| PIGF_UP.V1_UP                         | -0,081 | 0,026 | 0,00625 | 1 |
| BIOCARTA_SPPA_PATHWAY                 | -0,081 | 0,026 | 0,09069 | 1 |
| GSE360_LOW_DOSE_B_MALAYI_VS_M_TUBE    | -0,081 | 0,026 | 0,00888 | 1 |

|                                       |        |       |         |   |
|---------------------------------------|--------|-------|---------|---|
| GSE1432_1H_VS_24H_IFNG_MICROGLIA_UP   | -0,081 | 0,026 | 0,00546 | 1 |
| GLYCOLIPID_METABOLIC_PROCESS          | -0,081 | 0,026 | 0,0842  | 1 |
| MODULE_528                            | -0,081 | 0,026 | 0,41682 | 1 |
| ACTIN_CYTOSKELETON_ORGANIZATION_AND   | -0,081 | 0,027 | 0,00031 | 1 |
| THEILGAARD_NEUTROPHIL_AT_SKIN_WOUND   | -0,081 | 0,027 | 0,01548 | 1 |
| BROWNE_HCMV_INFECTION_8HR_UP          | -0,081 | 0,027 | 0,00965 | 1 |
| GSE17721_CTRL_VS_LPS_6H_BMDM_UP       | -0,081 | 0,027 | 0,00115 | 1 |
| NUCLEAR_MATRIX                        | -0,081 | 0,027 | 0,02425 | 1 |
| FONTAINE_FOLLICULAR_THYROID_ADENOMA   | -0,081 | 0,027 | 0,00825 | 1 |
| HAMAI_APOPTOSIS_VIA_TRAIL_UP          | -0,081 | 0,027 | 0,04703 | 1 |
| chr1q23                               | -0,081 | 0,027 | 0,00835 | 1 |
| chr16q11                              | -0,081 | 0,027 | 0,44403 | 1 |
| GSE360_CTRL_VS_L_MAJOR_DC_UP          | -0,081 | 0,027 | 0,00029 | 1 |
| GSE9988_LOW_LPS_VS_ANTI_TREM1_AND     | -0,081 | 0,027 | 0,06971 | 1 |
| MODULE_188                            | -0,081 | 0,027 | 0,01006 | 1 |
| BOSCO_ALLERGEN_INDUCED_TH2_ASSOCIATI  | -0,081 | 0,027 | 0,00541 | 1 |
| REACTOME_ADAPTIVE_IMMUNE_SYSTEM       | -0,081 | 0,027 | 0,08543 | 1 |
| GNF2_IL2RB                            | -0,081 | 0,027 | 0,02261 | 1 |
| LEUKOCYTE_DIFFERENTIATION             | -0,081 | 0,027 | 0,04319 | 1 |
| ACETYLCHOLINE_BINDING                 | -0,081 | 0,027 | 0,10471 | 1 |
| REACTOME_REPAIR_SYNTHESIS_FOR_GAP_FIL | -0,081 | 0,027 | 0,0802  | 1 |
| COATED_VESICLE                        | -0,081 | 0,027 | 0,05377 | 1 |
| GSE39820_CTRL_VS_TGFBETA3_IL6_IL23A   | -0,081 | 0,027 | 0,00698 | 1 |
| IKEDA_MIR133_TARGETS_UP               | -0,081 | 0,027 | 0,06787 | 1 |
| G_PROTEIN_COUPLED_RECEPTOR_ACTIVITY   | -0,081 | 0,027 | 0,00111 | 1 |
| REACTOME_SIGNALING_BY_HIPPO           | -0,081 | 0,027 | 0,13858 | 1 |
| OXFORD_RALA_TARGETS_UP                | -0,081 | 0,027 | 0,64827 | 1 |
| PROTEIN_COMPLEX_ASSEMBLY              | -0,081 | 0,027 | 0,00111 | 1 |
| HOLLEMAN_PREDNISOLONE_RESISTANCE_ALL  | -0,081 | 0,027 | 0,02611 | 1 |
| GSE29618_PRE_VS_DAY7_POST_LAIV_FLU    | -0,081 | 0,027 | 0,02383 | 1 |
| REACTOME_LAGGING_STRAND_SYNTHESIS     | -0,081 | 0,027 | 0,10963 | 1 |
| REACTOME_CD28_CO_STIMULATION          | -0,081 | 0,027 | 0,04304 | 1 |
| GSE17721_4_VS_24H_CPG_BMDM_DN         | -0,081 | 0,027 | 0,00205 | 1 |
| GNF2_SPINK1                           | -0,081 | 0,027 | 0,00865 | 1 |
| TONKS_TARGETS_OF_RUNX1_RUNX1T1_FUSI   | -0,081 | 0,027 | 0,00507 | 1 |
| MODULE_237                            | -0,081 | 0,027 | 0,00748 | 1 |
| MORF_LMO1                             | -0,081 | 0,027 | 0,00031 | 1 |
| MORF_RAN                              | -0,081 | 0,027 | 0,27121 | 1 |
| V\$AR_02                              | -0,081 | 0,027 | 0,00038 | 1 |
| MODULE_218                            | -0,081 | 0,028 | 0,35047 | 1 |
| SRC_UP.V1_UP                          | -0,081 | 0,028 | 0,0009  | 1 |
| PID_HIVNEFPATHWAY                     | -0,081 | 0,028 | 0,02696 | 1 |



|                                        |        |       |         |   |
|----------------------------------------|--------|-------|---------|---|
| SIMBULAN_UV_RESPONSE_NORMAL_UP         | -0,081 | 0,028 | 0,16868 | 1 |
| SEROTONIN_RECEPTOR_ACTIVITY            | -0,081 | 0,028 | 0,00165 | 1 |
| KEGG_T_CELL_RECEPTOR_SIGNALING_PATHW   | -0,081 | 0,028 | 0,02282 | 1 |
| PID_WNT_SIGNALING_PATHWAY              | -0,081 | 0,028 | 0,11469 | 1 |
| AGUIRRE_PANCREATIC_CANCER_COPY_NUMBI   | -0,081 | 0,028 | 0,00516 | 1 |
| ZEMBUTSU_SENSITIVITY_TO_VINBLASTINE    | -0,081 | 0,028 | 0,07316 | 1 |
| BHATI_G2M_ARREST_BY_2METHOXYESTRADI    | -0,081 | 0,028 | 0,00111 | 1 |
| LEE_LIVER_CANCER_MYC_E2F1_UP           | -0,081 | 0,028 | 0,19426 | 1 |
| GSE14308_NAIVE_CD4_TCELL_VS_NATURAL    | -0,081 | 0,028 | 0,00467 | 1 |
| LY_AGING_MIDDLE_UP                     | -0,081 | 0,028 | 0,04943 | 1 |
| GSE14000_4H_VS_16H_LPS_DC_UP           | -0,081 | 0,028 | 0,04267 | 1 |
| MODULE_330                             | -0,081 | 0,028 | 0,00031 | 1 |
| SCHLOSSER_SERUM_RESPONSE_AUGMENTED_    | -0,081 | 0,028 | 0,03644 | 1 |
| CADWELL_ATG16L1_TARGETS_UP             | -0,081 | 0,028 | 0,00102 | 1 |
| CASORELLI_APL_SECONDARY_VS_DE_NOVO_    | -0,081 | 0,028 | 0,00147 | 1 |
| GSE27786_CD4_TCELL_VS_NKCELL_DN        | -0,081 | 0,028 | 0,06744 | 1 |
| PID_ER_NONGENOMIC_PATHWAY              | -0,081 | 0,028 | 0,00379 | 1 |
| DNA_DIRECTED_RNA_POLYMERASEII_CORE_C   | -0,08  | 0,028 | 0,02437 | 1 |
| REACTOME_REGULATION_OF_RHEB_GTPASE_    | -0,08  | 0,028 | 0,07406 | 1 |
| GAZIN_EPIGENETIC_SILENCING_BY_KRAS     | -0,08  | 0,028 | 0,22956 | 1 |
| GOUYER_TATI_TARGETS_UP                 | -0,08  | 0,028 | 0,01588 | 1 |
| REACTOME_INITIAL_TRIGGERING_OF_COMPLEI | 0,08   | 0,028 | 0,27393 | 1 |
| MODULE_87                              | -0,08  | 0,028 | 0,06705 | 1 |
| CENTROSOME_ORGANIZATION_AND_BIOGENE:   | -0,08  | 0,028 | 0,01703 | 1 |
| GSE9006_HEALTHY_VS_TYPE_2_DIABETES_I   | -0,08  | 0,028 | 0,0627  | 1 |
| KUUSELO_PANCREATIC_CANCER_19Q13_AMF    | -0,08  | 0,028 | 0,02478 | 1 |
| BIOCARTA_P53_PATHWAY                   | -0,08  | 0,028 | 0,00194 | 1 |
| TGCCTTA,MIR-124A                       | -0,08  | 0,028 | 0,00579 | 1 |
| NEGATIVE_REGULATION_OF_MYELOID_CELL_   | -0,08  | 0,028 | 0,00189 | 1 |
| GSE17721_POLYIC_VS_CPG_0.5H_BMDM_DN    | -0,08  | 0,028 | 0,00204 | 1 |
| chr12p13                               | -0,08  | 0,028 | 0,01578 | 1 |
| HOWLIN_CITED1_TARGETS_1_UP             | -0,08  | 0,028 | 0,00184 | 1 |
| MORF_RAD21                             | -0,08  | 0,028 | 0,56426 | 1 |
| PID_THROMBIN_PAR4_PATHWAY              | -0,08  | 0,028 | 0,00197 | 1 |
| MARSON_FOXP3_TARGETS_STIMULATED_UP     | -0,08  | 0,028 | 0,02042 | 1 |
| MORF_CNTN1                             | -0,08  | 0,029 | 0,00138 | 1 |
| PID_LKB1_PATHWAY                       | -0,08  | 0,029 | 0,00034 | 1 |
| MILI_PSEUDOPODIA_HAPTOTAXIS_UP         | -0,08  | 0,029 | 0,13913 | 1 |
| MISSIAGLIA_REGULATED_BY_METHYLATION_L  | -0,08  | 0,029 | 0,09608 | 1 |
| PID_TGFBPATHWAY                        | -0,08  | 0,029 | 0,00288 | 1 |
| MIKKELSEN_PLURIPOTENT_STATE_UP         | -0,08  | 0,029 | 0,10591 | 1 |
| MODULE_83                              | -0,08  | 0,029 | 0,0614  | 1 |

|                                       |       |       |         |   |
|---------------------------------------|-------|-------|---------|---|
| SCHLOSSER_SERUM_RESPONSE_DN           | -0,08 | 0,029 | 0,10544 | 1 |
| GSE29618_PRE_VS_DAY7_FLU_VACCINE_BC   | -0,08 | 0,029 | 0,00018 | 1 |
| LANG_MYB_FAMILY_TARGETS               | -0,08 | 0,029 | 0,2789  | 1 |
| GSE339_CD4POS_VS_CD4CD8DN_DC_IN_CUI   | -0,08 | 0,029 | 0,0211  | 1 |
| FERRANDO_TAL1_NEIGHBORS               | -0,08 | 0,029 | 0,05691 | 1 |
| V\$HOXA3_01                           | -0,08 | 0,029 | 0,01421 | 1 |
| CTTGTAT,MIR-381                       | -0,08 | 0,029 | 0,00564 | 1 |
| MODULE_278                            | -0,08 | 0,029 | 0,75744 | 1 |
| GSE14308_TH2_VS_TH1_DN                | -0,08 | 0,029 | 0,00506 | 1 |
| NUCLEOTIDE_METABOLIC_PROCESS          | -0,08 | 0,029 | 0,09265 | 1 |
| GSE13484_3H_UNSTIM_VS_YF17D_VACCINE   | -0,08 | 0,029 | 0,00245 | 1 |
| HU_ANGIOGENESIS_UP                    | -0,08 | 0,029 | 0,00108 | 1 |
| ADDYA_ERYTHROID_DIFFERENTIATION_BY_HE | -0,08 | 0,029 | 0,02808 | 1 |
| BARRIER_CANCER_RELAPSE_NORMAL_SAMPLI  | -0,08 | 0,029 | 0,00085 | 1 |
| GSE17974_CTRL_VS_ACT_IL4_AND_ANTI_IL  | -0,08 | 0,029 | 0,00046 | 1 |
| chr21q22                              | -0,08 | 0,029 | 0,02349 | 1 |
| GCM_NCAM1                             | -0,08 | 0,029 | 0,01044 | 1 |
| BIOCARTA_CASPASE_PATHWAY              | -0,08 | 0,029 | 0,12213 | 1 |
| GSE27786_LIN_NEG_VS_BCELL_DN          | -0,08 | 0,029 | 0,00041 | 1 |
| GSE11864_UNTREATED_VS_CSF1_IFNG_PAM   | -0,08 | 0,029 | 0,10488 | 1 |
| GSE29618_BCELL_VS_PDC_UP              | -0,08 | 0,029 | 0,01536 | 1 |
| STRIATED_MUSCLE_CONTRACTION_GO_0006   | -0,08 | 0,029 | 0,00319 | 1 |
| VEGF_A_UP.V1_UP                       | -0,08 | 0,029 | 0,00073 | 1 |
| HASLINGER_B_CLL_WITH_17P13_DELETION   | -0,08 | 0,029 | 0,11539 | 1 |
| SECRETORY_PATHWAY                     | 0,08  | 0,029 | 0,56484 | 1 |
| CHLORIDE_CHANNEL_ACTIVITY             | -0,08 | 0,029 | 0,00501 | 1 |
| BIOCARTA_PITX2_PATHWAY                | -0,08 | 0,029 | 0,00955 | 1 |
| WNT_UP.V1_DN                          | -0,08 | 0,029 | 0,00142 | 1 |
| SCHAEFFER_PROSTATE_DEVELOPMENT_AND_   | -0,08 | 0,029 | 0,00057 | 1 |
| REGULATION_OF_TRANSLATION             | -0,08 | 0,029 | 0,04424 | 1 |
| PECE_MAMMARY_STEM_CELL_UP             | -0,08 | 0,029 | 0,00394 | 1 |
| chr4q35                               | -0,08 | 0,029 | 0,03095 | 1 |
| chr7p21                               | -0,08 | 0,029 | 0,00234 | 1 |
| ENDOPLASMIC_RETICULUM_LUMEN           | -0,08 | 0,029 | 0,3833  | 1 |
| PENG_LEUCINE_DEPRIVATION_UP           | -0,08 | 0,03  | 0,02883 | 1 |
| GSE22886_DAY0_VS_DAY1_MONOCYTE_IN_    | -0,08 | 0,03  | 0,28302 | 1 |
| PID_P38_MKK3_6PATHWAY                 | -0,08 | 0,03  | 0,00046 | 1 |
| CHYLA_CBFA2T3_TARGETS_DN              | -0,08 | 0,03  | 0,00089 | 1 |
| GSE13229_IMM_VS_INTMATURE_NKCELL_DN   | -0,08 | 0,03  | 0,00109 | 1 |
| GNF2_KISS1                            | -0,08 | 0,03  | 0,00654 | 1 |
| YGCCTTGR_UNKNOWN                      | -0,08 | 0,03  | 0,00238 | 1 |
| CACGTTT,MIR-302A                      | -0,08 | 0,03  | 0,01497 | 1 |

|                                       |        |       |         |   |
|---------------------------------------|--------|-------|---------|---|
| GSE20366_TREG_VS_TCONV_UP             | -0,08  | 0,03  | 0,00734 | 1 |
| chr7q21                               | -0,08  | 0,03  | 0,00031 | 1 |
| POSITIVE_REGULATION_OF_CELLULAR_PROTE | -0,08  | 0,03  | 0,00719 | 1 |
| THUM_MIR21_TARGETS_HEART_DISEASE_UP   | -0,08  | 0,03  | 0,00076 | 1 |
| PID_HES_HEYPATHWAY                    | -0,08  | 0,03  | 0,00108 | 1 |
| ST_B_CELL_ANTIGEN_RECEPTOR            | -0,08  | 0,03  | 0,11237 | 1 |
| REACTOME_LIPOPROTEIN_METABOLISM       | -0,08  | 0,03  | 0,01282 | 1 |
| REACTOME_RAS_ACTIVATION_UOPN_CA2_IN   | -0,08  | 0,03  | 0,01607 | 1 |
| POSITIVE_REGULATION_OF_PROTEIN_METABC | -0,079 | 0,03  | 0,00672 | 1 |
| TERAMOTO_OPN_TARGETS_CLUSTER_6        | -0,079 | 0,03  | 0,00141 | 1 |
| REACTOME_RNA_POL_II_TRANSCRIPTION_PRE | -0,079 | 0,03  | 0,16271 | 1 |
| MIKKELSEN_IPS_ICP_WITH_H3K27ME3       | -0,079 | 0,03  | 0,00044 | 1 |
| GSE7460_TREG_VS_TCONV_ACT_WITH_TGFI   | -0,079 | 0,03  | 0,00548 | 1 |
| chr18q23                              | -0,079 | 0,03  | 0,00153 | 1 |
| chr4q11                               | -0,079 | 0,03  | 0,02965 | 1 |
| MODULE_6                              | -0,079 | 0,03  | 0,00321 | 1 |
| GRUETZMANN_PANCREATIC_CANCER_DN       | -0,079 | 0,03  | 0,00021 | 1 |
| MORF_STK17A                           | -0,079 | 0,03  | 0,00146 | 1 |
| GSE3982_EOSINOPHIL_VS_TH2_UP          | -0,079 | 0,03  | 0,00659 | 1 |
| GSE2826_WT_VS_XID_BCELL_DN            | -0,079 | 0,03  | 0,00744 | 1 |
| GSE17721_POLYIC_VS_CPG_8H_BMDM_UP     | -0,079 | 0,03  | 0,01217 | 1 |
| REACTOME_THE_ACTIVATION_OF_ARYLSULF,  | -0,079 | 0,03  | 0,04066 | 1 |
| KYNG_ENVIRONMENTAL_STRESS_RESPONSE_   | -0,079 | 0,031 | 0,03649 | 1 |
| REACTOME_ENDOGENOUS_STEROLS           | -0,079 | 0,031 | 0,01812 | 1 |
| AMIT_EGF_RESPONSE_240_MCF10A          | -0,079 | 0,031 | 0,03529 | 1 |
| FIGUEROA_AML_METHYLATION_CLUSTER_2_I  | -0,079 | 0,031 | 0,05119 | 1 |
| MODULE_146                            | -0,079 | 0,031 | 0,00304 | 1 |
| MOOTHA_GLYCOLYSIS                     | 0,079  | 0,031 | 0,02153 | 1 |
| YAO_TEMPORAL_RESPONSE_TO_PROGESTERC   | -0,079 | 0,031 | 0,03392 | 1 |
| GSE17721_POLYIC_VS_GARDIQUIMOD_2H_BI  | -0,079 | 0,031 | 0,08365 | 1 |
| GSE2706_UNSTIM_VS_8H_R848_DC_DN       | -0,079 | 0,031 | 0,10987 | 1 |
| MARIADASON_RESPONSE_TO_BUTYRATE_CUF   | -0,079 | 0,031 | 0,01095 | 1 |
| MANTOVANI_VIRAL_GPCR_SIGNALING_UP     | -0,079 | 0,031 | 0,02471 | 1 |
| GSE17721_0.5H_VS_8H_PAM3CSK4_BMDM_    | -0,079 | 0,031 | 0,07018 | 1 |
| GSE17721_12H_VS_24H_CPG_BMDM_DN       | -0,079 | 0,031 | 0,0705  | 1 |
| MEMBRANE_FRACTION                     | -0,079 | 0,031 | 0,02394 | 1 |
| SCHOEN_NFKB_SIGNALING                 | -0,079 | 0,031 | 0,0287  | 1 |
| GSE360_L_MAJOR_VS_T_GONDII_MAC_UP     | -0,079 | 0,031 | 0,0036  | 1 |
| GSE9006_TYPE_1_DIABETES_AT_DX_VS_4M   | -0,079 | 0,031 | 0,02206 | 1 |
| INDUCTION_OF_APOPTOSIS_BY_INTRACELLUL | -0,079 | 0,031 | 0,00874 | 1 |
| MA_MYELOID_DIFFERENTIATION_DN         | -0,079 | 0,031 | 0,05873 | 1 |
| MIYAGAWA_TARGETS_OF_EWSR1_ETS_FUSIC   | -0,079 | 0,031 | 0,00393 | 1 |

|                                      |        |       |         |   |
|--------------------------------------|--------|-------|---------|---|
| INGRAM_SHH_TARGETS_UP                | -0,079 | 0,031 | 0,00041 | 1 |
| GSE17721_ALL_VS_24H_PAM3CSK4_BMDM    | -0,079 | 0,031 | 0,05803 | 1 |
| KATSANOUELAVL1_TARGETS_UP            | -0,079 | 0,031 | 0,00234 | 1 |
| GSE15930_NAIVE_VS_24H_IN_VITRO_STIM  | -0,079 | 0,031 | 0,00086 | 1 |
| MIKKELSEN_NPC_LCP_WITH_H3K4ME3       | -0,079 | 0,031 | 0,00051 | 1 |
| FIRESTEIN_CTNNB1_PATHWAY_AND_PROLIFE | -0,079 | 0,031 | 0,09637 | 1 |
| SH3_SH2_ADAPTOR_ACTIVITY             | -0,079 | 0,031 | 0,00081 | 1 |
| GSE17721_CPG_VS_GARDIQUIMOD_24H_BMI  | -0,079 | 0,031 | 0,00803 | 1 |
| ENVELOPE                             | -0,079 | 0,031 | 0,19135 | 1 |
| ORGANELLE_ENVELOPE                   | -0,079 | 0,031 | 0,19135 | 1 |
| KEGG_NON_HOMOLOGOUS_END_JOINING      | -0,079 | 0,031 | 0,09154 | 1 |
| DURAND_STROMA_MAX_DN                 | -0,079 | 0,031 | 0,00091 | 1 |
| ST_G_ALPHA_S_PATHWAY                 | 0,079  | 0,031 | 0,44517 | 1 |
| GSE13306_RA_VS_UNTREATED_MEM_CD4_T   | -0,079 | 0,031 | 0,00489 | 1 |
| GSE26928_NAIVE_VS_CXCR5_POS_CD4_TCE  | -0,079 | 0,031 | 0,01194 | 1 |
| GSE25087_TREG_VS_TCONV_ADULT_UP      | -0,079 | 0,031 | 0,00721 | 1 |
| V\$HOX13_01                          | -0,079 | 0,031 | 0,00134 | 1 |
| GSE10325_CD4_TCELL_VS_BCELL_UP       | -0,079 | 0,031 | 0,00653 | 1 |
| GSE3982_BCELL_VS_BASOPHIL_DN         | -0,079 | 0,031 | 0,00268 | 1 |
| PID_NFAT_TFPATHWAY                   | -0,079 | 0,031 | 0,02735 | 1 |
| GHO_ATF5_TARGETS_UP                  | -0,079 | 0,031 | 0,05475 | 1 |
| WORSCHER_TUMOR_REJECTION_UP          | -0,079 | 0,032 | 0,05241 | 1 |
| GSE17721_LPS_VS_GARDIQUIMOD_8H_BMDM  | -0,079 | 0,032 | 0,01439 | 1 |
| GSE13484_12H_VS_3H_YF17D_VACCINE_S1  | -0,079 | 0,032 | 0,01581 | 1 |
| LIGASE_ACTIVITY                      | -0,079 | 0,032 | 0,07008 | 1 |
| MODULE_81                            | -0,079 | 0,032 | 0,27436 | 1 |
| MILI_PSEUDOPODIA                     | -0,079 | 0,032 | 0,09478 | 1 |
| BASSO_HAIRY_CELL_LEUKEMIA_DN         | -0,079 | 0,032 | 0,00061 | 1 |
| GSE3982_BASOPHIL_VS_CENT_MEMORY_CD4  | -0,079 | 0,032 | 0,02686 | 1 |
| WHITESIDE_CISPLATIN_RESISTANCE_DN    | -0,079 | 0,032 | 0,00148 | 1 |
| VANOEVELEN_MYOGENESIS_SIN3A_TARGETS  | -0,079 | 0,032 | 0,02044 | 1 |
| PLASARI_TGFB1_TARGETS_1HR_UP         | -0,079 | 0,032 | 0,00039 | 1 |
| RAY_TARGETS_OF_P210_BCR_ABL_FUSION   | -0,079 | 0,032 | 0,0661  | 1 |
| GSE17974_0.5H_VS_72H_IL4_AND_ANTI_IL | -0,079 | 0,032 | 0,02018 | 1 |
| PROTEIN_BINDING_BRIDGING             | -0,079 | 0,032 | 0,01248 | 1 |
| GSE13485_CTRL_VS_DAY3_YF17D_VACCINE  | -0,079 | 0,032 | 0,01036 | 1 |
| GSE17974_IL4_AND_ANTI_IL12_VS_UNTREA | -0,079 | 0,032 | 0,00019 | 1 |
| V\$DR1_Q3                            | -0,079 | 0,032 | 0,00071 | 1 |
| INTRACELLULAR_TRANSPORT              | -0,079 | 0,032 | 0,13619 | 1 |
| V\$EVI1_05                           | -0,078 | 0,032 | 0,00073 | 1 |
| GSE22886_IGG_IGA_MEMORY_BCELL_VS_BM  | -0,078 | 0,032 | 0,00853 | 1 |
| WAMUNYOKOLI_OVARIAN_CANCER_LMP_DN    | -0,078 | 0,032 | 0,00249 | 1 |

|                                       |        |       |         |   |
|---------------------------------------|--------|-------|---------|---|
| KLEIN_PRIMARY_EFFUSION_LYMPHOMA_DN    | -0,078 | 0,032 | 0,03925 | 1 |
| REGULATION_OF_T_CELL_ACTIVATION       | -0,078 | 0,032 | 0,04457 | 1 |
| CATTTCA,MIR-203                       | -0,078 | 0,032 | 0,00491 | 1 |
| BOYAULT_LIVER_CANCER_SUBCLASS_G1_DN   | -0,078 | 0,032 | 0,05579 | 1 |
| GCM_FANCL                             | -0,078 | 0,032 | 0,00486 | 1 |
| DASU_IL6_SIGNALING_SCAR_DN            | -0,078 | 0,032 | 0,00806 | 1 |
| chr7q34                               | -0,078 | 0,032 | 0,18853 | 1 |
| GSE22886_NAIVE_CD8_TCELL_VS_MEMORY_   | -0,078 | 0,032 | 0,00136 | 1 |
| KAECH_NAIVE_VS_MEMORY_CD8_TCELL_DN    | -0,078 | 0,032 | 0,02475 | 1 |
| NEWMAN_ERCC6_TARGETS_DN               | -0,078 | 0,032 | 0,02558 | 1 |
| REACTOME_NEGATIVE_REGULATION_OF_FGFF  | -0,078 | 0,032 | 0,0007  | 1 |
| V\$OCT1_02                            | -0,078 | 0,032 | 0,00017 | 1 |
| GSE360_L_DONOVANI_VS_T_GONDII_DC_UP   | -0,078 | 0,033 | 0,00189 | 1 |
| chr6p11                               | 0,078  | 0,033 | 0,0706  | 1 |
| GSE25087_TREG_VS_TCONV_FETUS_UP       | -0,078 | 0,033 | 0,02746 | 1 |
| REACTOME_SLBP_DEPENDENT_PROCESSING_(  | -0,078 | 0,033 | 0,18512 | 1 |
| RAS_PROTEIN_SIGNAL_TRANSDUCTION       | -0,078 | 0,033 | 0,00445 | 1 |
| GSE11057_EFF_MEM_VS_CENT_MEM_CD4_T    | -0,078 | 0,033 | 0,0186  | 1 |
| DAUER_STAT3_TARGETS_UP                | -0,078 | 0,033 | 0,0407  | 1 |
| HELLER_SILENCED_BY_METHYLATION_UP     | -0,078 | 0,033 | 0,08324 | 1 |
| BEHAVIOR                              | -0,078 | 0,033 | 0,06055 | 1 |
| LIPID_BINDING                         | -0,078 | 0,033 | 0,00294 | 1 |
| REACTOME_PLATELET_SENSITIZATION_BY_LL | -0,078 | 0,033 | 0,25901 | 1 |
| V\$PU1_Q6                             | -0,078 | 0,033 | 0,00261 | 1 |
| PID_ECADHERIN_NASCENTAJ_PATHWAY       | -0,078 | 0,033 | 0,27316 | 1 |
| YAMASHITA_LIVER_CANCER_STEM_CELL_DN   | -0,078 | 0,033 | 0,00288 | 1 |
| REACTOME_NOD1_2_SIGNALING_PATHWAY     | -0,078 | 0,033 | 0,19176 | 1 |
| GSE15324_NAIVE_VS_ACTIVATED_CD8_TCE   | -0,078 | 0,033 | 0,00059 | 1 |
| chr19q13                              | -0,078 | 0,033 | 0,00205 | 1 |
| GSE360_DC_VS_MAC_B_MALAYI_HIGH_DOSE   | -0,078 | 0,033 | 0,00899 | 1 |
| GSE14308_TH1_VS_INDUCED_TREG_UP       | -0,078 | 0,033 | 0,03396 | 1 |
| SMITH_TERT_TARGETS_DN                 | -0,078 | 0,033 | 0,01594 | 1 |
| CELL_ACTIVATION                       | -0,078 | 0,033 | 0,03443 | 1 |
| BIOCARTA_PYK2_PATHWAY                 | -0,078 | 0,033 | 0,05856 | 1 |
| GCM_ZNF198                            | -0,078 | 0,033 | 0,04146 | 1 |
| THEILGAARD_NEUTROPHIL_AT_SKIN_WOUND.  | -0,078 | 0,033 | 0,24243 | 1 |
| GSE24142_ADULT_VS_FETAL_DN3_THYMOC    | -0,078 | 0,033 | 0,0134  | 1 |
| DENDRITE                              | -0,078 | 0,033 | 0,15271 | 1 |
| MCCLUNG_DELTA_FOSB_TARGETS_8WK        | -0,078 | 0,033 | 0,00201 | 1 |
| BIOCARTA_SARS_PATHWAY                 | -0,078 | 0,033 | 0,3896  | 1 |
| SMID_BREAST_CANCER_RELAPSE_IN_BONE_L  | 0,078  | 0,033 | 0,15012 | 1 |
| GSE3982_CENT_MEMORY_CD4_TCELL_VS_TI   | -0,078 | 0,033 | 0,00059 | 1 |

|                                      |        |       |         |   |
|--------------------------------------|--------|-------|---------|---|
| BIOCARTA_RACCYCD_PATHWAY             | -0,078 | 0,033 | 0,10028 | 1 |
| V\$TEL2_Q6                           | -0,078 | 0,034 | 0,01027 | 1 |
| GSE17721_0.5H_VS_4H_LPS_BMDM_DN      | -0,078 | 0,034 | 0,051   | 1 |
| MORF_CSNK2B                          | -0,078 | 0,034 | 0,44976 | 1 |
| BIOCARTA_EGF_PATHWAY                 | -0,078 | 0,034 | 0,01349 | 1 |
| GSE17721_CTRL_VS_POLYIC_24H_BMDM_UF  | -0,078 | 0,034 | 0,00117 | 1 |
| REGULATION_OF_MAP_KINASE_ACTIVITY    | -0,078 | 0,034 | 0,03148 | 1 |
| GSE7460_FOXP3_MUT_VS_HET_ACT_TCONV   | -0,078 | 0,034 | 0,00173 | 1 |
| CELLULAR_CARBOHYDRATE_CATABOLIC_PRO  | 0,078  | 0,034 | 0,11199 | 1 |
| chr1q24                              | -0,078 | 0,034 | 0,01547 | 1 |
| GSE7852_TREG_VS_TCONV_DN             | -0,078 | 0,034 | 0,00597 | 1 |
| TCGA_GLIOMASTOMA_MUTATED             | -0,078 | 0,034 | 0,09922 | 1 |
| QI_PLASMACYTOMA_UP                   | -0,078 | 0,034 | 0,02992 | 1 |
| METALLOPEPTIDASE_ACTIVITY            | -0,078 | 0,034 | 0,04082 | 1 |
| TTCCGTT,MIR-191                      | -0,078 | 0,034 | 0,01291 | 1 |
| HAHTOLA_CTCL_PATHOGENESIS            | -0,078 | 0,034 | 0,04305 | 1 |
| BLUM_RESPONSE_TO_SALIRASIB_UP        | -0,078 | 0,034 | 0,63849 | 1 |
| WU_SILENCED_BY_METHYLATION_IN_BLADE  | -0,078 | 0,034 | 0,00014 | 1 |
| MODULE_525                           | -0,078 | 0,034 | 0,03866 | 1 |
| APICAL_PART_OF_CELL                  | -0,078 | 0,034 | 0,17775 | 1 |
| LEUKOCYTE_ACTIVATION                 | -0,078 | 0,034 | 0,03471 | 1 |
| RECEPTOR_SIGNALING_PROTEIN_ACTIVITY  | -0,078 | 0,034 | 0,01491 | 1 |
| PENG_RAPAMYCIN_RESPONSE_UP           | -0,078 | 0,034 | 0,00251 | 1 |
| MODULE_149                           | -0,077 | 0,034 | 0,09017 | 1 |
| PICCALUGA_ANGIOIMMUNOBLASTIC_LYMPHON | -0,077 | 0,034 | 0,00865 | 1 |
| TURASHVILI_BREAST_DUCTAL_CARCINOMA_\ | -0,077 | 0,034 | 0,0192  | 1 |
| MODULE_111                           | -0,077 | 0,034 | 0,01008 | 1 |
| BIOCARTA_KERATINOCYTE_PATHWAY        | -0,077 | 0,035 | 0,00544 | 1 |
| GSE20715_WT_VS_TLR4_KO_24H_OZONE_I   | -0,077 | 0,035 | 0,00287 | 1 |
| GSE31082_DN_VS_CD4_SP_THYMOCYTE_UP   | -0,077 | 0,035 | 0,33755 | 1 |
| KEGG_ALDOSTERONE_REGULATED_SODIUM_R  | -0,077 | 0,035 | 0,00047 | 1 |
| TONKS_TARGETS_OF_RUNX1_RUNX1T1_FUSI  | -0,077 | 0,035 | 0,02215 | 1 |
| TONKS_TARGETS_OF_RUNX1_RUNX1T1_FUSI  | -0,077 | 0,035 | 0,00037 | 1 |
| PROTEIN_KINASE_CASCADE               | -0,077 | 0,035 | 0,00813 | 1 |
| WEST_ADRENOCORTICAL_TUMOR_MARKERS_   | -0,077 | 0,035 | 0,00071 | 1 |
| FUNG_IL2_TARGETS_WITH_STAT5_BINDING_ | -0,077 | 0,035 | 0,04638 | 1 |
| chr9p                                | -0,077 | 0,035 | 0,1015  | 1 |
| GSE17721_CTRL_VS_GARDIQUIMOD_6H_BMC  | -0,077 | 0,035 | 0,01459 | 1 |
| DETECTION_OF_CHEMICAL_STIMULUS       | -0,077 | 0,035 | 0,00078 | 1 |
| LIU_CDX2_TARGETS_DN                  | -0,077 | 0,035 | 0,07451 | 1 |
| GSE14308_TH1_VS_NATURAL_TREG_DN      | -0,077 | 0,035 | 0,00078 | 1 |
| SHIN_B_CELL_LYMPHOMA_CLUSTER_5       | -0,077 | 0,035 | 0,08705 | 1 |

|                                       |        |       |         |   |
|---------------------------------------|--------|-------|---------|---|
| SKELETAL_DEVELOPMENT                  | -0,077 | 0,035 | 0,006   | 1 |
| MODULE_88                             | -0,077 | 0,035 | 0,00144 | 1 |
| GSE17974_0H_VS_6H_IN_VITRO_ACT_CD4_   | -0,077 | 0,035 | 0,00035 | 1 |
| GSE17974_0H_VS_1H_IN_VITRO_ACT_CD4_   | -0,077 | 0,035 | 0,07431 | 1 |
| ATAACCT,MIR-154                       | -0,077 | 0,035 | 0,00274 | 1 |
| MORF_PHB                              | -0,077 | 0,035 | 0,10006 | 1 |
| ROPERO_HDAC2_TARGETS                  | -0,077 | 0,035 | 0,00598 | 1 |
| FLECHNER_BIOPSY_KIDNEY_TRANSPLANT_OK  | -0,077 | 0,035 | 0,02362 | 1 |
| REACTOME_SEMA4D_INDUCED_CELL_MIGRAT   | -0,077 | 0,035 | 0,00052 | 1 |
| REACTOME_CELL_SURFACE_INTERACTIONS_A  | -0,077 | 0,035 | 0,05441 | 1 |
| GSE7852_TREG_VS_TCONV_LN_UP           | -0,077 | 0,035 | 0,01883 | 1 |
| MODULE_213                            | -0,077 | 0,035 | 0,00304 | 1 |
| GSE10239_KLRG1INT_VS_KLRG1HIGH_EFF_C  | -0,077 | 0,035 | 0,06617 | 1 |
| KIM_GLIS2_TARGETS_UP                  | -0,077 | 0,035 | 0,00699 | 1 |
| NIELSEN_GIST                          | -0,077 | 0,035 | 0,00355 | 1 |
| GSE360_T_GONDII_VS_B_MALAYI_HIGH_DOS  | -0,077 | 0,035 | 0,00205 | 1 |
| ONDER_CDH1_TARGETS_2_UP               | -0,077 | 0,035 | 0,00043 | 1 |
| REGULATION_OF_NUCLEOCYTOPLASMIC_TRAI  | -0,077 | 0,035 | 0,1557  | 1 |
| chr3q22                               | -0,077 | 0,035 | 0,22619 | 1 |
| BAKER_HEMATOPOESIS_STAT1_TARGETS      | -0,077 | 0,036 | 0,00959 | 1 |
| GSE20366_EX_VIVO_VS_DEC205_CONVERSI   | -0,077 | 0,036 | 0,01385 | 1 |
| PHONG_TNF_TARGETS_DN                  | -0,077 | 0,036 | 0,01254 | 1 |
| RNA_EXPORT_FROM_NUCLEUS               | -0,077 | 0,036 | 0,21675 | 1 |
| GSE24081_CONTROLLER_VS_PROGRESSOR_I   | -0,077 | 0,036 | 0,03157 | 1 |
| REACTOME_FACILITATIVE_NA_INDEPENDENT_ | -0,077 | 0,036 | 0,14938 | 1 |
| GSE3982_DC_VS_BASOPHIL_UP             | -0,077 | 0,036 | 0,02303 | 1 |
| REACTOME_PRE_NOTCH_EXPRESSION_AND_P   | -0,077 | 0,036 | 0,00768 | 1 |
| JIANG_HYPOXIA_CANCER                  | -0,077 | 0,036 | 0,04187 | 1 |
| GSE17721_0.5H_VS_12H_LPS_BMDM_UP      | -0,077 | 0,036 | 0,03418 | 1 |
| REACTOME_CD28_DEPENDENT_PI3K_AKT_SI   | -0,077 | 0,036 | 0,0339  | 1 |
| ZHONG_RESPONSE_TO_AZACITIDINE_AND_TS  | -0,077 | 0,036 | 0,02596 | 1 |
| V\$XBP1_01                            | -0,077 | 0,036 | 0,05296 | 1 |
| BOSCO_TH1_CYTOTOXIC_MODULE            | -0,077 | 0,036 | 0,08469 | 1 |
| GSE1460_DP_VS_CD4_THYMOCYTE_DN        | -0,077 | 0,036 | 0,00518 | 1 |
| ZHU_CMV_8_HR_DN                       | -0,077 | 0,036 | 0,00083 | 1 |
| GSE17721_CTRL_VS_PAM3CSK4_1H_BMDM_    | -0,077 | 0,036 | 0,01802 | 1 |
| ANION_CHANNEL_ACTIVITY                | -0,077 | 0,036 | 0,00708 | 1 |
| REACTOME_ROLE_OF_DCC_IN_REGULATING_   | 0,077  | 0,036 | 0,06354 | 1 |
| ROVERSI_GLIOMA_COPY_NUMBER_UP         | -0,077 | 0,036 | 0,00013 | 1 |
| MODULE_275                            | -0,077 | 0,037 | 0,02643 | 1 |
| TERAO_AOX4_TARGETS_SKIN_UP            | -0,077 | 0,037 | 0,00154 | 1 |
| GSE7460_FOXP3_MUT_VS_WT_ACT_WITH_T    | -0,077 | 0,037 | 0,00017 | 1 |

|                                       |        |       |         |   |
|---------------------------------------|--------|-------|---------|---|
| GCM_CASP2                             | -0,077 | 0,037 | 0,02386 | 1 |
| V\$EV11_02                            | -0,077 | 0,037 | 0,00284 | 1 |
| ENDOSOME                              | -0,077 | 0,037 | 0,0468  | 1 |
| NUCLEOTIDE_BIOSYNTHETIC_PROCESS       | -0,077 | 0,037 | 0,19764 | 1 |
| VALK_AML_WITH_FLT3_ITD                | -0,077 | 0,037 | 0,01181 | 1 |
| chr15q23                              | -0,077 | 0,037 | 0,00043 | 1 |
| GSE17721_PAM3CSK4_VS_CPG_4H_BMDM_L    | -0,077 | 0,037 | 0,04118 | 1 |
| AGGTGCA,MIR-500                       | -0,076 | 0,037 | 0,00058 | 1 |
| NEGATIVE_REGULATION_OF_ANGIOGENESIS   | -0,076 | 0,037 | 0,03483 | 1 |
| GSE22886_TCELL_VS_BCELL_NAIVE_UP      | -0,076 | 0,037 | 0,01055 | 1 |
| BERENJENO_TRANSFORMED_BY_RHOA_DN      | -0,076 | 0,037 | 0,00076 | 1 |
| GSE1432_CTRL_VS_IFNG_6H_MICROGLIA_UP  | -0,076 | 0,037 | 0,00242 | 1 |
| NING_CHRONIC_OBSTRUCTIVE_PULMONARY_L  | -0,076 | 0,037 | 0,0038  | 1 |
| BURTON_ADIPOGENESIS_9                 | -0,076 | 0,037 | 0,00582 | 1 |
| V\$HNF4_01_B                          | -0,076 | 0,037 | 0,0004  | 1 |
| TAAYNRNNTCC_UNKNOWN                   | -0,076 | 0,037 | 0,00208 | 1 |
| WIERENGA_STAT5A_TARGETS_DN            | -0,076 | 0,037 | 0,00242 | 1 |
| REACTOME_ADVANCED_GLYCOSYLATION_ENI   | -0,076 | 0,037 | 0,12945 | 1 |
| LIM_MAMMARY_LUMINAL_MATURE_UP         | 0,076  | 0,037 | 0,22768 | 1 |
| GSE14308_TH2_VS_INDUCED_TREG_UP       | -0,076 | 0,037 | 0,00017 | 1 |
| MODULE_55                             | -0,076 | 0,037 | 0,00183 | 1 |
| GSE17974_IL4_AND_ANTI_IL12_VS_UNTREA  | -0,076 | 0,037 | 0,00079 | 1 |
| POSITIVE_REGULATION_OF_JNK_ACTIVITY   | -0,076 | 0,037 | 0,07556 | 1 |
| GSE24142_DN2_VS_DN3_THYMOCYTE_UP      | -0,076 | 0,037 | 0,02626 | 1 |
| GAZDA_DIAMOND_BLACKFAN_ANEMIA_PROG    | -0,076 | 0,037 | 0,05143 | 1 |
| NOUSHMEHR_GBM_SOMATIC_MUTATED         | -0,076 | 0,037 | 0,23442 | 1 |
| KEEN_RESPONSE_TO_ROSIGLITAZONE_DN     | -0,076 | 0,038 | 0,02281 | 1 |
| MORF_RAP1A                            | -0,076 | 0,038 | 0,02788 | 1 |
| REACTOME_FRS2_MEDIATED_CASCADE        | -0,076 | 0,038 | 0,00174 | 1 |
| V\$HFH3_01                            | -0,076 | 0,038 | 0,0002  | 1 |
| ACEVEDO_LIVER_TUMOR_VS_NORMAL_ADJA    | -0,076 | 0,038 | 0,25751 | 1 |
| GSE17721_CTRL_VS_GARDIQUIMOD_8H_BMC   | -0,076 | 0,038 | 0,04995 | 1 |
| CELLULAR_RESPONSE_TO_STIMULUS         | -0,076 | 0,038 | 0,12873 | 1 |
| GSE9988_ANTI_TREM1_VS_LPS_MONOCYTE_   | -0,076 | 0,038 | 0,15151 | 1 |
| COWLING_MYCN_TARGETS                  | -0,076 | 0,038 | 0,00614 | 1 |
| GSE9650_NAIVE_VS_MEMORY_CD8_TCELL_L   | -0,076 | 0,038 | 0,03227 | 1 |
| IIZUKA_LIVER_CANCER_PROGRESSION_G1_G2 | -0,076 | 0,038 | 0,91335 | 1 |
| RAY_TARGETS_OF_P210_BCR_ABL_FUSION_   | -0,076 | 0,038 | 0,00757 | 1 |
| REGULATION_OF_LIPID_METABOLIC_PROCESS | -0,076 | 0,038 | 0,01153 | 1 |
| BROCKE_APOPTOSIS_REVERSED_BY_IL6      | -0,076 | 0,038 | 0,03845 | 1 |
| FINETTI_BREAST_CANCERS_KINOME_BLUE    | 0,076  | 0,038 | 0,14287 | 1 |
| GSE24142_EARLY_THYMIC_PROGENITOR_VS_  | -0,076 | 0,038 | 0,00355 | 1 |



|                                         |        |       |         |   |
|-----------------------------------------|--------|-------|---------|---|
| MARSON_BOUND_BY_FOXP3_STIMULATED        | -0,076 | 0,038 | 0,03594 | 1 |
| IZADPANAH_STEM_CELL_ADIPOSE_VS_BONE     | -0,076 | 0,038 | 0,00052 | 1 |
| GSE360_L_DONOVANI_VS_B_MALAYI_HIGH      | -0,076 | 0,038 | 0,03911 | 1 |
| RHODOPSIN_LIKE_RECEPTOR_ACTIVITY        | -0,076 | 0,038 | 0,00085 | 1 |
| CHEOK_RESPONSE_TO_MERCAPTOPYRIMIDINE_AN | -0,076 | 0,038 | 0,14459 | 1 |
| LU_TUMOR_VASCULATURE_UP                 | -0,076 | 0,038 | 0,03095 | 1 |
| GSE17721_CTRL_VS_CPG_1H_BMDM_DN         | -0,076 | 0,039 | 0,00073 | 1 |
| POLYSACCHARIDE_BINDING                  | -0,076 | 0,039 | 0,00828 | 1 |
| REACTOME_CLASS_C_3_METABOTROPIC_GLL     | -0,076 | 0,039 | 0,11307 | 1 |
| WEIGEL_OXIDATIVE_STRESS_BY_HNE_AND_T    | -0,076 | 0,039 | 0,00032 | 1 |
| POSITIVE_REGULATION_OF_PROTEIN_MODIFIC  | -0,076 | 0,039 | 0,00133 | 1 |
| CATGTAA,MIR-496                         | -0,076 | 0,039 | 0,00469 | 1 |
| GSE1460_NAIVE_CD4_TCELL_ADULT_BLOOD     | -0,076 | 0,039 | 0,00053 | 1 |
| LIN_APC_TARGETS                         | -0,076 | 0,039 | 0,10585 | 1 |
| BIOCARTA_SPRY_PATHWAY                   | -0,076 | 0,039 | 0,04572 | 1 |
| PROTEOLYSIS                             | -0,076 | 0,039 | 0,03393 | 1 |
| REACTOME_CHEMOKINE_RECEPTORS_BIND_C     | -0,076 | 0,039 | 0,09094 | 1 |
| MALIK_REPRESSED_BY_ESTROGEN             | -0,076 | 0,039 | 0,13357 | 1 |
| GSE32423_CTRL_VS_IL7_MEMORY_CD8_TCE     | -0,076 | 0,039 | 0,0002  | 1 |
| BIOCARTA_IGF1_PATHWAY                   | -0,076 | 0,039 | 0,00013 | 1 |
| BOYLAN_MULTIPLE_MYELOMA_C_D_DN          | -0,076 | 0,039 | 0,00873 | 1 |
| GSE22886_IGG_IGA_MEMORY_BCELL_VS_BLC    | -0,076 | 0,039 | 0,00058 | 1 |
| CELLULAR_HOMEOSTASIS                    | -0,076 | 0,039 | 0,01443 | 1 |
| GSE12845_IGD_POS_BLOOD_VS_NAIVE_TON     | -0,076 | 0,039 | 0,00112 | 1 |
| PID_RHOA_REG_PATHWAY                    | -0,076 | 0,039 | 0,00029 | 1 |
| PROTEIN_HOMODIMERIZATION_ACTIVITY       | -0,076 | 0,039 | 0,001   | 1 |
| BIOCARTA_VEGF_PATHWAY                   | -0,075 | 0,039 | 0,19417 | 1 |
| KEGG_PYRIMIDINE_METABOLISM              | -0,075 | 0,039 | 0,11075 | 1 |
| BIOCARTA_ETS_PATHWAY                    | -0,075 | 0,039 | 0,03431 | 1 |
| GSE27786_NKTCELL_VS_ERYTHROBLAST_UP     | -0,075 | 0,04  | 0,00042 | 1 |
| BIOCARTA_NFAT_PATHWAY                   | -0,075 | 0,04  | 0,01868 | 1 |
| ALCALA_APOPTOSIS                        | -0,075 | 0,04  | 0,0815  | 1 |
| REGULATION_OF_HEART_CONTRACTION         | -0,075 | 0,04  | 0,00368 | 1 |
| MORF_NME2                               | -0,075 | 0,04  | 0,07124 | 1 |
| GSE12845_IGD_NEG_BLOOD_VS_NAIVE_TON     | -0,075 | 0,04  | 0,22497 | 1 |
| GSE17721_12H_VS_24H_GARDIQUIMOD_BMI     | -0,075 | 0,04  | 0,0582  | 1 |
| OUELLET_CULTURED_OVARIAN_CANCER_INV     | -0,075 | 0,04  | 0,10779 | 1 |
| AMIT_EGF_RESPONSE_60_HELA               | -0,075 | 0,04  | 0,00448 | 1 |
| BIOCARTA_CHEMICAL_PATHWAY               | -0,075 | 0,04  | 0,02307 | 1 |
| DACOSTA_UV_RESPONSE_VIA_ERCC3_DN        | -0,075 | 0,04  | 0,07876 | 1 |
| GSE29617_CTRL_VS_TIV_FLU_VACCINE_PBM    | -0,075 | 0,04  | 0,01381 | 1 |
| TSUNODA_CISPLATIN_RESISTANCE_UP         | -0,075 | 0,04  | 0,01554 | 1 |

|                                       |        |       |         |   |
|---------------------------------------|--------|-------|---------|---|
| MUELLER_COMMON_TARGETS_OF_AML_FUSIC   | -0,075 | 0,04  | 0,17585 | 1 |
| PID_RAC1_REG_PATHWAY                  | -0,075 | 0,04  | 0,00578 | 1 |
| GSE1460_INTRATHYMIC_T_PROGENITOR_VS_  | -0,075 | 0,041 | 0,00188 | 1 |
| BIOCARTA_NO2IL12_PATHWAY              | -0,075 | 0,041 | 0,05663 | 1 |
| LEIN_ASTROCYTE_MARKERS                | -0,075 | 0,041 | 0,00127 | 1 |
| LYMPHOCYTE_ACTIVATION                 | -0,075 | 0,041 | 0,04909 | 1 |
| MODULE_263                            | -0,075 | 0,041 | 0,16305 | 1 |
| LEE_LIVER_CANCER_MYC_TGFA_DN          | -0,075 | 0,041 | 0,02921 | 1 |
| WANG_HCP_PROSTATE_CANCER              | -0,075 | 0,041 | 0,01234 | 1 |
| GSE9988_LPS_VS_LPS_AND_ANTI_TREM1_M   | -0,075 | 0,041 | 0,05855 | 1 |
| GAVIN_IL2_RESPONSIVE_FOXP3_TARGETS_UI | -0,075 | 0,041 | 0,13845 | 1 |
| BIOCARTA_MEF2D_PATHWAY                | -0,075 | 0,041 | 0,09332 | 1 |
| CALCIUM_ION_TRANSPORT                 | -0,075 | 0,041 | 0,03574 | 1 |
| YAGI_AML_WITH_11Q23_REARRANGED        | -0,075 | 0,041 | 0,00216 | 1 |
| MORF_DAP3                             | -0,075 | 0,041 | 0,56116 | 1 |
| KONDO_HYPOXIA                         | -0,075 | 0,041 | 0,02127 | 1 |
| HYDROLASE_ACTIVITY_ACTING_ON_CARBON_  | -0,075 | 0,041 | 0,10818 | 1 |
| WAGSCHAL_EHMT2_TARGETS_UP             | -0,075 | 0,041 | 0,0708  | 1 |
| MACROMOLECULE_LOCALIZATION            | -0,075 | 0,041 | 0,04207 | 1 |
| chr3p13                               | -0,075 | 0,041 | 0,0314  | 1 |
| REACTOME_P53_INDEPENDENT_G1_S_DNA_I   | -0,075 | 0,041 | 0,80909 | 1 |
| MUNSHI_MULTIPLE_MYELOMA_DN            | -0,075 | 0,041 | 0,40523 | 1 |
| REACTOME_CA_DEPENDENT_EVENTS          | -0,075 | 0,041 | 0,00021 | 1 |
| GRAESSMANN_RESPONSE_TO_MC_AND_DOXC    | -0,075 | 0,041 | 0,0076  | 1 |
| COLLIS_PRKDC_REGULATORS               | 0,075  | 0,041 | 0,05073 | 1 |
| GSE17721_CTRL_VS_PAM3CSK4_24H_BMDM    | -0,075 | 0,041 | 0,00298 | 1 |
| chr4q26                               | -0,075 | 0,041 | 0,00694 | 1 |
| GYORFFY_MITOXANTRONE_RESISTANCE       | -0,075 | 0,041 | 0,00105 | 1 |
| REN_ALVEOLAR_RHABDOMYOSARCOMA_DN      | -0,075 | 0,041 | 0,06418 | 1 |
| LEIN_CHOROID_PLEXUS_MARKERS           | -0,075 | 0,041 | 0,0007  | 1 |
| NIKOLSKY_BREAST_CANCER_14Q22_AMPLICI  | -0,075 | 0,041 | 0,00528 | 1 |
| BIOCARTA_MCALPAIN_PATHWAY             | -0,075 | 0,041 | 0,16233 | 1 |
| PODAR_RESPONSE_TO_ADAPHOSTIN_UP       | -0,075 | 0,042 | 0,07532 | 1 |
| BIOCARTA_TCR_PATHWAY                  | -0,075 | 0,042 | 0,01156 | 1 |
| CYTOSOLIC_PART                        | 0,075  | 0,042 | 0,50038 | 1 |
| GSE20366_TREG_VS_NAIVE_CD4_TCELL_DE   | -0,075 | 0,042 | 0,01544 | 1 |
| MAINA_HYPOXIA_VHL_TARGETS_UP          | -0,075 | 0,042 | 0,03074 | 1 |
| GROSS_HIF1A_TARGETS_DN                | -0,075 | 0,042 | 0,39385 | 1 |
| GSE17974_0H_VS_72H_IN_VITRO_ACT_CD4   | -0,075 | 0,042 | 0,0037  | 1 |
| ZHENG_RESPONSE_TO_ARSENITE_UP         | -0,075 | 0,042 | 0,27046 | 1 |
| chr15q14                              | -0,075 | 0,042 | 0,01632 | 1 |
| HARRIS_HYPOXIA                        | -0,075 | 0,042 | 0,09384 | 1 |

|                                       |        |       |         |   |
|---------------------------------------|--------|-------|---------|---|
| MORF_CTBP1                            | -0,075 | 0,042 | 0,44502 | 1 |
| GSE13484_3H_UNSTIM_VS_YF17D_VACCINE   | -0,075 | 0,042 | 0,12984 | 1 |
| REGULATION_OF_ANGIOGENESIS            | -0,075 | 0,042 | 0,02985 | 1 |
| GSE1448_CTRL_VS_ANTI_VALPHA2_DP_THY   | -0,075 | 0,042 | 0,00652 | 1 |
| RODWELL_AGING_KIDNEY_UP               | -0,075 | 0,042 | 0,02257 | 1 |
| chr8q13                               | -0,075 | 0,042 | 0,2118  | 1 |
| MODULE_43                             | 0,074  | 0,042 | 0,32097 | 1 |
| GSE360_HIGH_DOSE_B_MALAYI_VS_M_TUBE   | -0,074 | 0,042 | 0,01116 | 1 |
| GSE360_L_MAJOR_VS_B_MALAYI_HIGH_DOS   | -0,074 | 0,042 | 0,03229 | 1 |
| ACEVEDO_LIVER_TUMOR_VS_NORMAL_ADJA    | -0,074 | 0,042 | 0,00027 | 1 |
| ABE_INNER_EAR                         | -0,074 | 0,042 | 0,02226 | 1 |
| GSE17721_POLYIC_VS_PAM3CSK4_12H_BMI   | -0,074 | 0,042 | 0,00357 | 1 |
| BROWNE_HCMV_INFECTION_1HR_UP          | -0,074 | 0,042 | 0,00049 | 1 |
| REACTOME_P53_DEPENDENT_G1_DNA_DAM/    | -0,074 | 0,043 | 0,70507 | 1 |
| V\$HNF4ALPHA_Q6                       | -0,074 | 0,043 | 0,00033 | 1 |
| WAGNER_APO2_SENSITIVITY               | -0,074 | 0,043 | 0,30894 | 1 |
| GSE360_DC_VS_MAC_M_TUBERCULOSIS_UP    | -0,074 | 0,043 | 0,0267  | 1 |
| GTGTCAA,MIR-514                       | -0,074 | 0,043 | 0,00832 | 1 |
| GSE9006_HEALTHY_VS_TYPE_2_DIABETES_I  | -0,074 | 0,043 | 0,04627 | 1 |
| TIEN_INTESTINE_PROBIOTICS_24HR_DN     | -0,074 | 0,043 | 0,24859 | 1 |
| ONO_AML1_TARGETS_UP                   | -0,074 | 0,043 | 0,04719 | 1 |
| SCHLESINGER_METHYLATED_DE_NOVO_IN_C,  | -0,074 | 0,043 | 0,0007  | 1 |
| chr2p15                               | -0,074 | 0,043 | 0,50849 | 1 |
| COLIN_PILOCYTIC_ASTROCYTOMA_VS_GLIOMI | -0,074 | 0,043 | 0,2665  | 1 |
| EXTRINSIC_TO_MEMBRANE                 | -0,074 | 0,043 | 0,01514 | 1 |
| KANG_GIST_WITH_PDGFR_A_DN             | -0,074 | 0,043 | 0,1722  | 1 |
| GSE22886_DC_VS_MONOCYTE_UP            | -0,074 | 0,043 | 0,11492 | 1 |
| JAK2_DN.V1_DN                         | -0,074 | 0,043 | 0,00161 | 1 |
| CHEOK_RESPONSE_TO_HD_MTX_DN           | -0,074 | 0,043 | 0,00813 | 1 |
| INGA_TP53_TARGETS                     | -0,074 | 0,043 | 0,00032 | 1 |
| SHAFFER_IRF4_TARGETS_IN_ACTIVATED_B_I | -0,074 | 0,043 | 0,92811 | 1 |
| MIKKELSEN_MEF_ICP_WITH_H3K27ME3       | -0,074 | 0,043 | 0,00631 | 1 |
| ESTABLISHMENT_OF_LOCALIZATION         | -0,074 | 0,044 | 0,00121 | 1 |
| FERRARI_RESPONSE_TO_FENRETINIDE_UP    | -0,074 | 0,044 | 0,05216 | 1 |
| NEGATIVE_REGULATION_OF_TRANSFERASE_A  | -0,074 | 0,044 | 0,00278 | 1 |
| GSE26928_EFF_MEMORY_VS_CXCR5_POS_CI   | -0,074 | 0,044 | 0,00225 | 1 |
| KEGG_HYPERTROPHIC_CARDIOMYOPATHY_HCI  | -0,074 | 0,044 | 0,00036 | 1 |
| GSE9988_ANTI_TREM1_VS_LOW_LPS_MONO    | -0,074 | 0,044 | 0,15574 | 1 |
| SCHAEFFER_PROSTATE_DEVELOPMENT_AND_   | -0,074 | 0,044 | 0,00018 | 1 |
| GSE7852_LN_VS_FAT_TREG_DN             | -0,074 | 0,044 | 0,00682 | 1 |
| KEGG_B_CELL_RECEPTOR_SIGNALING_PATHW  | -0,074 | 0,044 | 0,04352 | 1 |
| MEMBRANE_LIPID_BIOSYNTHETIC_PROCESS   | -0,074 | 0,044 | 0,00832 | 1 |

|                                       |        |       |         |   |
|---------------------------------------|--------|-------|---------|---|
| GSE3982_EOSINOPHIL_VS_CENT_MEMORY_CI  | -0,074 | 0,044 | 0,04431 | 1 |
| GCM_CSNK1D                            | 0,074  | 0,044 | 0,08458 | 1 |
| REGULATION_OF_CELLULAR_PH             | 0,074  | 0,044 | 0,94732 | 1 |
| GSE17721_CTRL_VS_PAM3CSK4_0.5H_BMDI   | -0,074 | 0,044 | 0,07938 | 1 |
| SARCOMERE                             | -0,074 | 0,044 | 0,01583 | 1 |
| GSE360_T_GONDII_VS_M_TUBERCULOSIS_MA  | -0,074 | 0,044 | 0,01345 | 1 |
| CARBOHYDRATE_CATABOLIC_PROCESS        | 0,074  | 0,044 | 0,13618 | 1 |
| CARBON_CARBON_LYASE_ACTIVITY          | 0,074  | 0,044 | 0,04725 | 1 |
| MODULE_455                            | -0,074 | 0,044 | 0,00365 | 1 |
| MARKS_ACETYLATED_NON_HISTONE_PROTEII  | -0,074 | 0,044 | 0,14565 | 1 |
| KEGG_NATURAL_KILLER_CELL_MEDIATED_CY  | -0,074 | 0,044 | 0,1435  | 1 |
| DACOSTA_UV_RESPONSE_VIA_ERCC3_XPCS_   | -0,074 | 0,044 | 0,02696 | 1 |
| GSE17721_LPS_VS_PAM3CSK4_12H_BMDM_    | -0,074 | 0,044 | 0,02146 | 1 |
| GCACCTT,MIR-18A,MIR-18B               | -0,074 | 0,045 | 0,00152 | 1 |
| REACTOME_SHC_MEDIATED_CASCADE         | -0,074 | 0,045 | 0,00166 | 1 |
| REACTOME_METABOLISM_OF_AMINO_ACIDS_   | -0,074 | 0,045 | 0,12982 | 1 |
| YAO_HOXA10_TARGETS_VIA_PROGESTERONE   | -0,074 | 0,045 | 0,00912 | 1 |
| RGAGGAARY_V\$PU1_Q6                   | -0,074 | 0,045 | 0,0038  | 1 |
| KEGG_AMINOACYL_TRNA_BIOSYNTHESIS      | -0,074 | 0,045 | 0,75311 | 1 |
| GSE3982_CENT_MEMORY_CD4_TCELL_VS_N    | -0,074 | 0,045 | 0,01458 | 1 |
| ZHENG_BOUND_BY_FOXP3                  | -0,074 | 0,045 | 0,01809 | 1 |
| chr1q25                               | -0,074 | 0,045 | 0,02985 | 1 |
| REACTOME_PYRIMIDINE_METABOLISM        | -0,074 | 0,045 | 0,10499 | 1 |
| GSE2706_UNSTIM_VS_2H_R848_DC_DN       | -0,074 | 0,045 | 0,0638  | 1 |
| REACTOME_REMOVAL_OF_THE_FLAP_INTERM   | -0,074 | 0,045 | 0,13965 | 1 |
| REACTOME_INSULIN_RECEPTOR_SIGNALLING_ | -0,074 | 0,045 | 0,00037 | 1 |
| CYTOSKELETON_DEPENDENT_INTRACELLULAIF | -0,073 | 0,045 | 0,23991 | 1 |
| GSE3982_MAST_CELL_VS_NKCELL_DN        | -0,073 | 0,045 | 0,00088 | 1 |
| DAZARD_UV_RESPONSE_CLUSTER_G5         | -0,073 | 0,045 | 0,53066 | 1 |
| TONKS_TARGETS_OF_RUNX1_RUNX1T1_FUSI   | -0,073 | 0,045 | 0,00901 | 1 |
| V\$USF_Q6                             | -0,073 | 0,045 | 0,00099 | 1 |
| GSE29617_CTRL_VS_DAY7_TIV_FLU_VACCI   | -0,073 | 0,045 | 0,01219 | 1 |
| GSE11057_NAIVE_VS_MEMORY_CD4_TCELL_   | -0,073 | 0,045 | 0,05785 | 1 |
| GSE36476_CTRL_VS_TSST_ACT_40H_MEMO    | -0,073 | 0,045 | 0,00214 | 1 |
| GSE18791_CTRL_VS_NEWCASTLE_VIRUS_DC   | -0,073 | 0,045 | 0,08766 | 1 |
| BASSO_HAIRY_CELL_LEUKEMIA_UP          | -0,073 | 0,045 | 0,03912 | 1 |
| PID_S1P_S1P2_PATHWAY                  | -0,073 | 0,045 | 0,00212 | 1 |
| WANG_RESPONSE_TO_PACLITAXEL_VIA_MAP   | -0,073 | 0,045 | 0,00252 | 1 |
| GSE11057_NAIVE_VS_CENT_MEMORY_CD4_    | -0,073 | 0,045 | 0,05723 | 1 |
| SIG_BCR_SIGNALING_PATHWAY             | -0,073 | 0,045 | 0,0306  | 1 |
| GSE360_DC_VS_MAC_UP                   | -0,073 | 0,045 | 0,02586 | 1 |
| GENTILE_UV_RESPONSE_CLUSTER_D6        | -0,073 | 0,045 | 0,02342 | 1 |

|                                        |        |       |         |   |
|----------------------------------------|--------|-------|---------|---|
| INTRAMOLECULAR_OXIDOREDUCTASE_ACTIVI   | -0,073 | 0,045 | 0,40643 | 1 |
| HORIUCHI_WTAP_TARGETS_UP               | -0,073 | 0,045 | 0,01663 | 1 |
| PETRETTO_HEART_MASS_QTL_CIS_UP         | -0,073 | 0,045 | 0,00235 | 1 |
| YAO_TEMPORAL_RESPONSE_TO_PROGESTERC    | -0,073 | 0,045 | 0,03589 | 1 |
| MCBRYAN_PUBERTAL_BREAST_6_7WK_UP       | -0,073 | 0,045 | 0,0188  | 1 |
| GLUTAMATE_RECEPTOR_ACTIVITY            | -0,073 | 0,045 | 0,00032 | 1 |
| CHAUHAN_RESPONSE_TO_METHOXYESTRADI     | -0,073 | 0,045 | 0,06018 | 1 |
| GSE39820_IL1B_IL6_VS_IL1B_IL6_IL23A_TF | -0,073 | 0,046 | 0,01476 | 1 |
| CALCIUM_ION_BINDING                    | -0,073 | 0,046 | 0,01617 | 1 |
| GNF2_MMP11                             | -0,073 | 0,046 | 0,00802 | 1 |
| REACTOME_INTRINSIC_PATHWAY_FOR_APOPT   | -0,073 | 0,046 | 0,02179 | 1 |
| GSE3982_DC_VS_MAC_LPS_STIM_DN          | -0,073 | 0,046 | 0,06852 | 1 |
| ROSS_LEUKEMIA_WITH_MLL_FUSIONS         | -0,073 | 0,046 | 0,01302 | 1 |
| GSE7460_CTRL_VS_FOXP3_OVEREXPR_TCON    | -0,073 | 0,046 | 0,00337 | 1 |
| WANG_RESPONSE_TO_BEXAROTENE_DN         | -0,073 | 0,046 | 0,15249 | 1 |
| BOYLAN_MULTIPLE_MYELOMA_D_DN           | -0,073 | 0,046 | 0,05261 | 1 |
| ACTAYRNNCCCR_UNKNOWN                   | -0,073 | 0,046 | 0,00461 | 1 |
| RATTENBACHER_BOUND_BY_CELF1            | -0,073 | 0,046 | 0,00529 | 1 |
| GSE22886_NAIVE_CD8_TCELL_VS_NKCELL_    | -0,073 | 0,046 | 0,06383 | 1 |
| GARGALOVIC_RESPONSE_TO_OXIDIZED_PHOS   | -0,073 | 0,046 | 0,00564 | 1 |
| BIOCARTA_VDR_PATHWAY                   | 0,073  | 0,046 | 0,07188 | 1 |
| KEGG_PHOSPHATIDYLINOSITOL_SIGNALING_S  | -0,073 | 0,046 | 0,00551 | 1 |
| GILDEA_METASTASIS                      | -0,073 | 0,046 | 0,01846 | 1 |
| LAIHO_COLORECTAL_CANCER_SERRATED_UP    | -0,073 | 0,046 | 0,1617  | 1 |
| BIOCARTA_EIF4_PATHWAY                  | -0,073 | 0,046 | 0,02696 | 1 |
| FLOTHO_PEDIATRIC_ALL_THERAPY_RESPONS   | -0,073 | 0,046 | 0,00234 | 1 |
| BOYALT_LIVER_CANCER_SUBCLASS_G56_D     | -0,073 | 0,046 | 0,04347 | 1 |
| KEGG_FRUCTOSE_AND_MANNOSE_METABOLI     | 0,073  | 0,046 | 0,00659 | 1 |
| CELLULAR_CARBOHYDRATE_METABOLIC_PRO    | -0,073 | 0,046 | 0,06222 | 1 |
| KAECH_NAIVE_VS_MEMORY_CD8_TCELL_UP     | -0,073 | 0,046 | 0,00527 | 1 |
| MAINTENANCE_OF_CELLULAR_LOCALIZATION   | -0,073 | 0,047 | 0,20256 | 1 |
| GSE17721_0.5H_VS_24H_GARDIQUIMOD_BM    | -0,073 | 0,047 | 0,03044 | 1 |
| IGLESIAS_E2F_TARGETS_DN                | -0,073 | 0,047 | 0,00792 | 1 |
| MORF_GMPS                              | -0,073 | 0,047 | 0,88202 | 1 |
| V\$ELF1_Q6                             | -0,073 | 0,047 | 0,01688 | 1 |
| GSE7460_CTRL_VS_TGFB_TREATED_ACT_FC    | -0,073 | 0,047 | 0,00227 | 1 |
| PIEPOLI_LGI1_TARGETS_UP                | -0,073 | 0,047 | 0,00984 | 1 |
| MODULE_182                             | -0,073 | 0,047 | 0,09111 | 1 |
| GOLDRATH_IMMUNE_MEMORY                 | -0,073 | 0,047 | 0,01516 | 1 |
| GSE3982_MAC_VS_NEUTROPHIL_DN           | -0,073 | 0,047 | 0,01673 | 1 |
| ST_GA12_PATHWAY                        | -0,073 | 0,047 | 0,01843 | 1 |
| REACTOME_TRANSMEMBRANE_TRANSPORT_C     | -0,073 | 0,047 | 0,01999 | 1 |

|                                       |        |       |         |   |
|---------------------------------------|--------|-------|---------|---|
| RESPONSE_TO_TEMPERATURE_STIMULUS      | 0,073  | 0,047 | 0,00635 | 1 |
| SCHAEFFER_PROSTATE_DEVELOPMENT_AND_   | -0,073 | 0,047 | 0,08898 | 1 |
| GSE13411_NAIVE_VS_SWITCHED_MEMORY_E   | -0,073 | 0,047 | 0,02495 | 1 |
| GAVIN_FOXP3_TARGETS_CLUSTER_P3        | -0,073 | 0,047 | 0,01646 | 1 |
| RAMPON_ENRICHED_LEARNING_ENVIRONMEN   | -0,073 | 0,047 | 0,29068 | 1 |
| GSE17974_0H_VS_24H_IN_VITRO_ACT_CD4   | -0,073 | 0,047 | 0,00017 | 1 |
| NEUTRAL_AMINO_ACID_TRANSMEMBRANE_TF   | 0,073  | 0,047 | 0,02776 | 1 |
| DIAZ_CHRONIC_MEYLOGENOUS_LEUKEMIA_DN  | -0,073 | 0,047 | 0,01588 | 1 |
| chr10q24                              | -0,073 | 0,047 | 0,0264  | 1 |
| BIOCARTA_AKAP13_PATHWAY               | -0,073 | 0,047 | 0,17918 | 1 |
| KEGG_DRUG_METABOLISM_OTHER_ENZYMES    | 0,073  | 0,047 | 0,04451 | 1 |
| AMIT_EGF_RESPONSE_40_HELA             | -0,073 | 0,047 | 0,00212 | 1 |
| YOSHIOKA_LIVER_CANCER_EARLY_RECURREN  | -0,073 | 0,047 | 0,1417  | 1 |
| chr1q                                 | -0,073 | 0,047 | 0,14136 | 1 |
| REACTOME_SIGNALING_BY_FGFR_MUTANTS    | -0,073 | 0,047 | 0,00525 | 1 |
| TTGGGAG,MIR-150                       | -0,073 | 0,047 | 0,00027 | 1 |
| JOHNSTONE_PARVB_TARGETS_1_DN          | -0,073 | 0,047 | 0,05335 | 1 |
| GSE27786_ERYTHROBLAST_VS_NEUTROPHIL   | -0,073 | 0,048 | 0,06452 | 1 |
| LEUKOCYTE_CHEMOTAXIS                  | -0,073 | 0,048 | 0,10562 | 1 |
| MODULE_113                            | -0,073 | 0,048 | 0,00147 | 1 |
| FARMER_BREAST_CANCER_CLUSTER_5        | -0,073 | 0,048 | 0,00797 | 1 |
| GALINDO_IMMUNE_RESPONSE_TO_ENTEROTO   | -0,073 | 0,048 | 0,09024 | 1 |
| V\$PAX5_02                            | -0,073 | 0,048 | 0,01282 | 1 |
| V\$MEF2_04                            | -0,073 | 0,048 | 0,01059 | 1 |
| CENTROSOME_CYCLE                      | -0,073 | 0,048 | 0,12083 | 1 |
| GRAHAM_CML_QUIESCENT_VS_CML_DIVIDING  | -0,072 | 0,048 | 0,09223 | 1 |
| chr8p23                               | -0,072 | 0,048 | 0,00572 | 1 |
| REACTOME_SIGNALING_BY_ACTIVATED_POIN  | -0,072 | 0,048 | 0,05601 | 1 |
| BASOLATERAL_PLASMA_MEMBRANE           | -0,072 | 0,048 | 0,031   | 1 |
| BIOCARTA_MTOR_PATHWAY                 | -0,072 | 0,048 | 0,02481 | 1 |
| ZHANG_ANTIVIRAL_RESPONSE_TO_RIBAVIRIN | -0,072 | 0,048 | 0,06516 | 1 |
| BUSA_SAM68_TARGETS_DN                 | 0,072  | 0,048 | 0,52598 | 1 |
| GNF2_ZAP70                            | -0,072 | 0,048 | 0,02048 | 1 |
| EXCRETION                             | -0,072 | 0,048 | 0,04604 | 1 |
| REACTOME_MITOCHONDRIAL_TRNA_AMINOAC   | -0,072 | 0,048 | 0,32938 | 1 |
| PID_BETACATENIN_DEG_PATHWAY           | 0,072  | 0,048 | 0,28494 | 1 |
| BERTUCCI_MEDULLARY_VS_DUCTAL_BREAST   | -0,072 | 0,048 | 0,17384 | 1 |
| PID_TCRCALCIUMPATHWAY                 | -0,072 | 0,049 | 0,06544 | 1 |
| T_CELL_ACTIVATION                     | -0,072 | 0,049 | 0,06291 | 1 |
| REACTOME_ADP_SIGNALLING_THROUGH_P2R   | -0,072 | 0,049 | 0,06578 | 1 |
| WEBER_METHYLATED_ICP_IN_SPERM_DN      | -0,072 | 0,049 | 0,84255 | 1 |
| GSE3982_BCELL_VS_NKCELL_DN            | -0,072 | 0,049 | 0,00597 | 1 |

|                                      |        |       |         |   |
|--------------------------------------|--------|-------|---------|---|
| GSE37416_0H_VS_3H_F_TULARENSIS_LVS_  | -0,072 | 0,049 | 0,4219  | 1 |
| GSE7764_NKCELL_VS_SPLENOCYTE_DN      | -0,072 | 0,049 | 0,03479 | 1 |
| SERVITJA_ISLET_HNF1A_TARGETS_DN      | -0,072 | 0,049 | 0,00022 | 1 |
| PLASARI_NFIC_TARGETS_BASAL_DN        | -0,072 | 0,049 | 0,00411 | 1 |
| YAO_TEMPORAL_RESPONSE_TO_PROGESTERC  | -0,072 | 0,049 | 0,00222 | 1 |
| GSE14000_UNSTIM_VS_16H_LPS_DC_TRANS  | -0,072 | 0,049 | 0,18002 | 1 |
| MALONEY_RESPONSE_TO_17AAG_UP         | -0,072 | 0,049 | 0,00218 | 1 |
| WHITFIELD_CELL_CYCLE_M_G1            | -0,072 | 0,049 | 0,11295 | 1 |
| GCM_BNIP1                            | -0,072 | 0,049 | 0,00497 | 1 |
| ACTGCCT,MIR-34B                      | -0,072 | 0,05  | 0,00356 | 1 |
| GSE7460_FOXP3_MUT_VS_WT_ACT_WITH_T   | -0,072 | 0,05  | 0,07519 | 1 |
| BIOCARTA_BARRESTIN_SRC_PATHWAY       | -0,072 | 0,05  | 0,02327 | 1 |
| DING_LUNG_CANCER_MUTATED_FREQUENTLY  | -0,072 | 0,05  | 0,00088 | 1 |
| VIRAL_GENOME_REPLICATION             | -0,072 | 0,05  | 0,48999 | 1 |
| TIMOFEEVA_GROWTH_STRESS_VIA_STAT1_D  | -0,072 | 0,05  | 0,10151 | 1 |
| ZHAN_V2_LATE_DIFFERENTIATION_GENES   | -0,072 | 0,05  | 0,24713 | 1 |
| UBIQUITIN_BINDING                    | -0,072 | 0,05  | 0,09497 | 1 |
| SEMENZA_HIF1_TARGETS                 | -0,072 | 0,05  | 0,38544 | 1 |
| RESPONSE_TO_WOUNDING                 | -0,072 | 0,05  | 0,04231 | 1 |
| TRANSPORT                            | -0,072 | 0,05  | 0,00091 | 1 |
| ER_TO_GOLGI_VESICLE_MEDIATED_TRANSPO | 0,072  | 0,05  | 0,02579 | 1 |
| GSE27786_CD4_TCELL_VS_ERYTHROBLAST   | -0,072 | 0,05  | 0,01212 | 1 |
| MICROVILLUS                          | -0,072 | 0,05  | 0,00942 | 1 |
| PID_PS1PATHWAY                       | -0,072 | 0,05  | 0,00488 | 1 |
| YANG_MUC2_TARGETS_DUODENUM_6MO_UP    | -0,072 | 0,05  | 0,16005 | 1 |
| GSE17721_LPS_VS_POLYIC_0.5H_BMDM_DN  | -0,072 | 0,05  | 0,00063 | 1 |
| PHOSPHOLIPID_BINDING                 | -0,072 | 0,05  | 0,00091 | 1 |
| TSENG_ADIPOGENIC_POTENTIAL_DN        | -0,072 | 0,05  | 0,00409 | 1 |
| BIOCARTA_FMLP_PATHWAY                | -0,072 | 0,05  | 0,08612 | 1 |
| CHEMICAL_HOMEOSTASIS                 | -0,072 | 0,05  | 0,01756 | 1 |
| BIOCARTA_ARENRF2_PATHWAY             | -0,072 | 0,051 | 0,02411 | 1 |
| ONO_FOXP3_TARGETS_DN                 | -0,072 | 0,051 | 0,05081 | 1 |
| RAMJAUN_APOPTOSIS_BY_TGFB1_VIA_SMAD  | -0,072 | 0,051 | 0,01441 | 1 |
| GSE10239_MEMORY_VS_KLRG1HIGH_EFF_CD  | -0,072 | 0,051 | 0,41118 | 1 |
| CAGCACT,MIR-512-3P                   | -0,072 | 0,051 | 0,00692 | 1 |
| MCBRYAN_PUBERTAL_BREAST_5_6WK_DN     | -0,072 | 0,051 | 0,0273  | 1 |
| MODULE_358                           | -0,072 | 0,051 | 0,01883 | 1 |
| MORPHOGENESIS_OF_AN_EPITHELIUM       | -0,072 | 0,051 | 0,2396  | 1 |
| MARZEC_IL2_SIGNALING_UP              | -0,072 | 0,051 | 0,11831 | 1 |
| HAHTOLA_SEZARY_SYNDROM_UP            | -0,072 | 0,051 | 0,17225 | 1 |
| ZHAN_MULTIPLE_MYELOMA_CD1_AND_CD2_   | -0,072 | 0,051 | 0,02566 | 1 |
| MODULE_107                           | -0,072 | 0,051 | 0,06438 | 1 |

|                                       |        |       |         |   |
|---------------------------------------|--------|-------|---------|---|
| BUSA_SAM68_TARGETS_UP                 | -0,072 | 0,051 | 0,00088 | 1 |
| FARMER_BREAST_CANCER_CLUSTER_1        | -0,071 | 0,051 | 0,07543 | 1 |
| BRUNEAU_SEPTATION_ATRIAL              | -0,071 | 0,051 | 0,11644 | 1 |
| THIOLESTER_HYDROLASE_ACTIVITY         | -0,071 | 0,051 | 0,58739 | 1 |
| TARTE_PLASMA_CELL_VS_PLASMABLAST_UI   | -0,071 | 0,051 | 0,01271 | 1 |
| PID_AP1_PATHWAY                       | -0,071 | 0,051 | 0,00784 | 1 |
| RHO_PROTEIN_SIGNAL_TRANSDUCTION       | -0,071 | 0,051 | 0,00653 | 1 |
| V\$NKX25_01                           | -0,071 | 0,051 | 0,00892 | 1 |
| GSE7460_TCONV_VS_TREG_THYMUS_DN       | -0,071 | 0,051 | 0,04328 | 1 |
| GSE17974_CTRL_VS_ACT_IL4_AND_ANTI_IL  | -0,071 | 0,052 | 0,00237 | 1 |
| GSE37416_CTRL_VS_48H_F_TULARENSIS_LI  | 0,071  | 0,052 | 0,00652 | 1 |
| ATGTACA,MIR-493                       | -0,071 | 0,052 | 0,00539 | 1 |
| GSE14000_UNSTIM_VS_4H_LPS_DC_TRANSL   | -0,071 | 0,052 | 0,0048  | 1 |
| VILIMAS_NOTCH1_TARGETS_UP             | -0,071 | 0,052 | 0,03086 | 1 |
| GSE15930_NAIVE_VS_24H_IN_VITRO_STIM_  | -0,071 | 0,052 | 0,00137 | 1 |
| ATF2_UP.V1_DN                         | -0,071 | 0,052 | 0,00719 | 1 |
| BOYLAN_MULTIPLE_MYELOMA_C_DN          | -0,071 | 0,052 | 0,02402 | 1 |
| GTGCAAA,MIR-507                       | -0,071 | 0,052 | 0,00304 | 1 |
| NIELSEN_SCHWANNOMA_UP                 | -0,071 | 0,052 | 0,00713 | 1 |
| FOSTER_KDM1A_TARGETS_DN               | -0,071 | 0,052 | 0,0153  | 1 |
| GSE2706_UNSTIM_VS_2H_LPS_AND_R848_I   | -0,071 | 0,052 | 0,08989 | 1 |
| SECRETIN_LIKE_RECEPTOR_ACTIVITY       | -0,071 | 0,052 | 0,0004  | 1 |
| GSE17721_CTRL_VS_POLYIC_1H_BMDM_DN    | -0,071 | 0,052 | 0,00578 | 1 |
| GSE27786_BCELL_VS_NKTCELL_UP          | -0,071 | 0,052 | 0,05088 | 1 |
| GAGACTG,MIR-452                       | -0,071 | 0,052 | 0,05822 | 1 |
| MARCHINI TRABECTEDIN_RESISTANCE_UP    | 0,071  | 0,052 | 0,2121  | 1 |
| MODULE_417                            | 0,071  | 0,052 | 0,49406 | 1 |
| LIPID_RAFT                            | -0,071 | 0,052 | 0,06529 | 1 |
| MARTINEZ_RESPONSE_TO TRABECTEDIN_UP   | -0,071 | 0,052 | 0,14353 | 1 |
| CORRE_MULTIPLE_MYELOMA_DN             | -0,071 | 0,052 | 0,00287 | 1 |
| GNF2_MATK                             | -0,071 | 0,053 | 0,02677 | 1 |
| WILSON_PROTEASES_AT_TUMOR_BONE_INTE   | -0,071 | 0,053 | 0,23246 | 1 |
| GNF2_DDX5                             | -0,071 | 0,053 | 0,00431 | 1 |
| chr11p12                              | -0,071 | 0,053 | 0,02118 | 1 |
| JOHANSSON_BRAIN_CANCER_EARLY_VS_LAT   | -0,071 | 0,053 | 0,00356 | 1 |
| HU_GENOTOXIN_ACTION_DIRECT_VS_INDIREC | -0,071 | 0,053 | 0,11159 | 1 |
| GCM_BAG5                              | 0,071  | 0,053 | 0,10463 | 1 |
| GSE24634_TEFF_VS_TCONV_DAY5_IN_CULT   | -0,071 | 0,053 | 0,00262 | 1 |
| GSE13738_RESTING_VS_TCR_ACTIVATED_CI  | -0,071 | 0,053 | 0,0017  | 1 |
| POSITIVE_REGULATION_OF_SIGNAL_TRANSDU | -0,071 | 0,053 | 0,00774 | 1 |
| DIRMEIER_LMP1_RESPONSE_LATE_UP        | -0,071 | 0,053 | 0,17685 | 1 |
| RAGHAVACHARI_PLATELET_SPECIFIC_GENES  | -0,071 | 0,053 | 0,09845 | 1 |



|                                      |        |       |         |   |
|--------------------------------------|--------|-------|---------|---|
| GSE14000_TRANSLATED_RNA_VS_MRNA_DC   | -0,071 | 0,053 | 0,01639 | 1 |
| GSE7460_CTRL_VS_FOXP3_OVEREXPR_TCON  | -0,071 | 0,053 | 0,00503 | 1 |
| ZHAN_LATE_DIFFERENTIATION_GENES_UP   | -0,071 | 0,053 | 0,00546 | 1 |
| V\$IRF1_01                           | -0,071 | 0,053 | 0,01098 | 1 |
| CHEN_HOXA5_TARGETS_6HR_DN            | -0,071 | 0,053 | 0,32258 | 1 |
| TRANSLATIONAL_INITIATION             | -0,071 | 0,053 | 0,30708 | 1 |
| KIM_MYCN_AMPLIFICATION_TARGETS_DN    | -0,071 | 0,053 | 0,05942 | 1 |
| URS_ADIPOCYTE_DIFFERENTIATION_UP     | -0,071 | 0,053 | 0,00243 | 1 |
| chr8q22                              | -0,071 | 0,053 | 0,20873 | 1 |
| GRADE_COLON_CANCER_DN                | -0,071 | 0,053 | 0,00943 | 1 |
| GSE360_L_MAJOR_VS_M_TUBERCULOSIS_DC  | -0,071 | 0,053 | 0,01894 | 1 |
| GSE15215_CD2_POS_VS_NEG_PDC_DN       | -0,071 | 0,053 | 0,13337 | 1 |
| NAKAMURA_TUMOR_ZONE_PERIPHERAL_VS_(  | -0,071 | 0,054 | 0,02379 | 1 |
| chr9p11                              | -0,071 | 0,054 | 0,17368 | 1 |
| FINETTI_BREAST_CANCER_KINOME_GREEN   | -0,071 | 0,054 | 0,06587 | 1 |
| SERINE_HYDROLASE_ACTIVITY            | -0,071 | 0,054 | 0,00194 | 1 |
| GSE7852_LN_VS_FAT_TCONV_DN           | -0,071 | 0,054 | 0,00629 | 1 |
| ACEVEDO_LIVER_CANCER_UP              | -0,071 | 0,054 | 0,10149 | 1 |
| GSE3337_CTRL_VS_16H_IFNG_IN_CD8POS_I | -0,071 | 0,054 | 0,06284 | 1 |
| KIM_PTEN_TARGETS_UP                  | -0,071 | 0,054 | 0,05511 | 1 |
| EGFR_UP.V1_UP                        | -0,071 | 0,054 | 0,18638 | 1 |
| BIOCARTA_MITOCHONDRIA_PATHWAY        | -0,071 | 0,054 | 0,02591 | 1 |
| chr18p                               | 0,071  | 0,054 | 0,26099 | 1 |
| GSE8678_IL7R_LOW_VS_HIGH_EFF_CD8_TCI | -0,071 | 0,054 | 0,00711 | 1 |
| INTERFERON_GAMMA_PRODUCTION          | -0,07  | 0,054 | 0,10394 | 1 |
| ENDOMEMBRANE_SYSTEM                  | -0,07  | 0,054 | 0,27479 | 1 |
| KYNG_RESPONSE_TO_H2O2                | -0,07  | 0,054 | 0,03563 | 1 |
| MODULE_119                           | -0,07  | 0,055 | 0,03311 | 1 |
| GSE339_CD4POS_VS_CD8POS_DC_UP        | -0,07  | 0,055 | 0,03267 | 1 |
| MORF_ATRX                            | -0,07  | 0,055 | 0,00088 | 1 |
| KEGG_ENDOCYTOSIS                     | -0,07  | 0,055 | 0,00125 | 1 |
| REACTOME_ENOS_ACTIVATION_AND_REGULA  | 0,07   | 0,055 | 0,19591 | 1 |
| GSE10325_BCELL_VS_LUPUS_BCELL_DN     | -0,07  | 0,055 | 0,2725  | 1 |
| OXFORD_RALA_OR_RALB_TARGETS_DN       | -0,07  | 0,055 | 0,00845 | 1 |
| LIN_MELANOMA_COPY_NUMBER_UP          | -0,07  | 0,055 | 0,00288 | 1 |
| GSE17721_CTRL_VS_GARDIQUIMOD_8H_BMC  | -0,07  | 0,055 | 0,14291 | 1 |
| chrXq27                              | -0,07  | 0,055 | 0,1722  | 1 |
| YAO_TEMPORAL_RESPONSE_TO_PROGESTERC  | -0,07  | 0,055 | 0,15922 | 1 |
| BIOCARTA_CALCINEURIN_PATHWAY         | -0,07  | 0,055 | 0,01559 | 1 |
| REACTOME_NA_CL_DEPENDENT_NEUROTRAN   | -0,07  | 0,055 | 0,74489 | 1 |
| TAGCTTT,MIR-9                        | -0,07  | 0,055 | 0,00523 | 1 |
| MODULE_426                           | -0,07  | 0,055 | 0,0249  | 1 |

|                                       |       |       |         |   |
|---------------------------------------|-------|-------|---------|---|
| CACTTTG,MIR-520G,MIR-520H             | -0,07 | 0,055 | 0,01999 | 1 |
| GSE17974_CTRL_VS_ACT_IL4_AND_ANTI_IL  | -0,07 | 0,055 | 0,00313 | 1 |
| LYMPHOCYTE_DIFFERENTIATION            | -0,07 | 0,055 | 0,05502 | 1 |
| HELICASE_ACTIVITY                     | -0,07 | 0,055 | 0,2972  | 1 |
| HOFFMANN_IMMATURE_TO_MATURE_B_LYMP    | -0,07 | 0,055 | 0,01099 | 1 |
| HOLLEMAN_VINCRIStINE_RESISTANCE_B_ALL | -0,07 | 0,055 | 0,0555  | 1 |
| BOYLAN_MULTIPLE_MYELOMA_PCA1_DN       | 0,07  | 0,055 | 0,01531 | 1 |
| WONG_PROTEASOME_GENE_MODULE           | -0,07 | 0,055 | 0,96705 | 1 |
| OXIDOREDUCTASE_ACTIVITY_ACTING_ON_TH  | 0,07  | 0,056 | 0,32324 | 1 |
| GSE6269_FLU_VS_STREP_AUREUS_INF_PBM   | -0,07 | 0,056 | 0,00122 | 1 |
| PID_ALK1PATHWAY                       | -0,07 | 0,056 | 0,00591 | 1 |
| DAZARD_UV_RESPONSE_CLUSTER_G28        | -0,07 | 0,056 | 0,17254 | 1 |
| WOOD_EBV_EBNA1_TARGETS_DN             | -0,07 | 0,056 | 0,07324 | 1 |
| KIM_HYPOXIA                           | -0,07 | 0,056 | 0,2476  | 1 |
| GSE3982_NEUTROPHIL_VS_TH2_UP          | -0,07 | 0,056 | 0,01623 | 1 |
| LABBE_TARGETS_OF_TGFB1_AND_WNT3A_C    | -0,07 | 0,056 | 0,05063 | 1 |
| IMMUNOLOGICAL_SYNAPSE                 | -0,07 | 0,056 | 0,04369 | 1 |
| GNF2_PTPN4                            | -0,07 | 0,056 | 0,02851 | 1 |
| LEE_LIVER_CANCER_CIPROFIBRATE_UP      | -0,07 | 0,056 | 0,01806 | 1 |
| chrXq21                               | -0,07 | 0,056 | 0,00252 | 1 |
| TRANSMEMBRANE_RECEPTOR_PROTEIN_PHOS   | -0,07 | 0,056 | 0,00446 | 1 |
| GSE3982_EOSINOPHIL_VS_MAST_CELL_UP    | -0,07 | 0,056 | 0,01625 | 1 |
| EXTRACELLULAR_STRUCTURE_ORGANIZATION  | -0,07 | 0,056 | 0,12632 | 1 |
| YIH_RESPONSE_TO_ARSENITE_C1           | -0,07 | 0,057 | 0,12632 | 1 |
| LUI_THYROID_CANCER_PAX8_PPARG_UP      | -0,07 | 0,057 | 0,03784 | 1 |
| OXYGEN_BINDING                        | 0,07  | 0,057 | 0,46537 | 1 |
| VASCULATURE_DEVELOPMENT               | -0,07 | 0,057 | 0,04125 | 1 |
| ZHENG_IL22_SIGNALING_UP               | -0,07 | 0,057 | 0,04212 | 1 |
| RYCACNRRNRRNCAG_UNKNOWN               | -0,07 | 0,057 | 0,00652 | 1 |
| GSE3982_EOSINOPHIL_VS_TH1_UP          | -0,07 | 0,057 | 0,01857 | 1 |
| ATM_DN.V1_DN                          | -0,07 | 0,057 | 0,02118 | 1 |
| YAGUE_PRETUMOR_DRUG_RESISTANCE_DN     | -0,07 | 0,057 | 0,03622 | 1 |
| BROWNE_HCMV_INFECTION_2HR_UP          | -0,07 | 0,057 | 0,00038 | 1 |
| GUANYL_NUCLEOTIDE_BINDING             | -0,07 | 0,057 | 0,0113  | 1 |
| GENTILE_UV_LOW_DOSE_DN                | -0,07 | 0,057 | 0,05073 | 1 |
| GSE3982_MEMORY_CD4_TCELL_VS_TH2_UP    | -0,07 | 0,057 | 0,00239 | 1 |
| chr8q11                               | -0,07 | 0,057 | 0,06963 | 1 |
| CYTOPLASMIC_MEMBRANE_BOUND_VESICLE    | -0,07 | 0,057 | 0,00547 | 1 |
| PETRETTO_LEFT_VENTRICLE_MASS_QTL_CIS  | -0,07 | 0,057 | 0,13015 | 1 |
| RNA_POLYMERASE_ACTIVITY               | -0,07 | 0,057 | 0,1784  | 1 |
| SHIPP_DLBCL_VS_FOLLICULAR_LYMPHOMA_C  | -0,07 | 0,057 | 0,00299 | 1 |
| DEFENSE_RESPONSE_TO_BACTERIUM         | -0,07 | 0,057 | 0,0368  | 1 |

|                                       |        |       |         |   |
|---------------------------------------|--------|-------|---------|---|
| GSE12845_NAIVE_VS_PRE_GC_TONSIL_BCEL  | -0,07  | 0,058 | 0,0002  | 1 |
| GINESTIER_BREAST_CANCER_20Q13_AMPLIFI | 0,07   | 0,058 | 0,90664 | 1 |
| FARMER_BREAST_CANCER_APOCRINE_VS_BA   | -0,07  | 0,058 | 0,00928 | 1 |
| WONG_ENDMETRIUM_CANCER_UP             | -0,07  | 0,058 | 0,18573 | 1 |
| GSE3337_4H_VS_16H_IFNG_IN_CD8POS_DC   | -0,07  | 0,058 | 0,26686 | 1 |
| SERINE_TYPE_ENDOPEPTIDASE_ACTIVITY    | -0,07  | 0,058 | 0,00148 | 1 |
| BOYLAN_MULTIPLE_MYELOMA_PCA3_UP       | -0,07  | 0,058 | 0,00357 | 1 |
| chr6p25                               | -0,07  | 0,058 | 0,19167 | 1 |
| SYNAPSE_ORGANIZATION_AND_BIOGENESIS   | -0,069 | 0,058 | 0,2507  | 1 |
| NIELSEN_SYNOVIAL_SARCOMA_UP           | -0,069 | 0,058 | 0,2631  | 1 |
| POSITIVE_REGULATION_OF_TRANSFERASE_AI | -0,069 | 0,058 | 0,01835 | 1 |
| SANA_TNF_SIGNALING_UP                 | -0,069 | 0,058 | 0,18514 | 1 |
| MARZEC_IL2_SIGNALING_DN               | -0,069 | 0,058 | 0,02554 | 1 |
| KEGG_ETHER_LIPID_METABOLISM           | -0,069 | 0,058 | 0,0095  | 1 |
| MILI_PSEUDOPODIA_CHEMOTAXIS_UP        | -0,069 | 0,058 | 0,10527 | 1 |
| chr6q26                               | -0,069 | 0,058 | 0,0603  | 1 |
| GSE37416_CTRL_VS_24H_F_TULARENSIS_LI  | -0,069 | 0,058 | 0,1802  | 1 |
| IL15_UP.V1_DN                         | -0,069 | 0,059 | 0,00028 | 1 |
| MCBRYAN_PUBERTAL_BREAST_5_6WK_UP      | -0,069 | 0,059 | 0,01111 | 1 |
| PDGF_UP.V1_DN                         | -0,069 | 0,059 | 0,00471 | 1 |
| GSE29618_BCELL_VS_PDC_DAY7_FLU_VACI   | -0,069 | 0,059 | 0,02346 | 1 |
| GSE3982_EFF_MEMORY_CD4_TCELL_VS_NK    | -0,069 | 0,059 | 0,02497 | 1 |
| LIPID_HOMEOSTASIS                     | -0,069 | 0,059 | 0,02665 | 1 |
| REACTOME_ION_CHANNEL_TRANSPORT        | -0,069 | 0,059 | 0,05839 | 1 |
| WUNDER_INFLAMMATORY_RESPONSE_AND_C    | -0,069 | 0,059 | 0,00488 | 1 |
| GSE2706_R848_VS_LPS_8H_STIM_DC_DN     | -0,069 | 0,059 | 0,08679 | 1 |
| V\$EVI1_01                            | 0,069  | 0,059 | 0,55915 | 1 |
| CATION_HOMEOSTASIS                    | -0,069 | 0,059 | 0,02375 | 1 |
| REACTOME_GPVI_MEDIATED_ACTIVATION_CA  | -0,069 | 0,059 | 0,01913 | 1 |
| GSE27786_LIN_NEG_VS_MONO_MAC_DN       | -0,069 | 0,059 | 0,11152 | 1 |
| REACTOME_CDT1_ASSOCIATION_WITH_THE_   | -0,069 | 0,059 | 0,85332 | 1 |
| V\$HNF4_01                            | -0,069 | 0,059 | 0,00052 | 1 |
| GSE339_CD4POS_VS_CD4CD8DN_DC_UP       | -0,069 | 0,059 | 0,04729 | 1 |
| WIERENGA_STAT5A_TARGETS_GROUP2        | -0,069 | 0,059 | 0,09944 | 1 |
| GSE6269_STREP_AUREUS_VS_STREP_PNEUM   | -0,069 | 0,059 | 0,00301 | 1 |
| MODULE_46                             | -0,069 | 0,06  | 0,03436 | 1 |
| SMID_BREAST_CANCER_BASAL_DN           | 0,069  | 0,06  | 0,02983 | 1 |
| BURTON_ADIPOGENESIS_11                | -0,069 | 0,06  | 0,03411 | 1 |
| GSE7460_CD8_TCELL_VS_TREG_ACT_UP      | -0,069 | 0,06  | 0,00202 | 1 |
| REACTOME_PROCESSIVE_SYNTHESIS_ON_THE  | -0,069 | 0,06  | 0,18562 | 1 |
| KEGG_MAPK_SIGNALING_PATHWAY           | -0,069 | 0,06  | 0,00091 | 1 |
| IGARASHI_ATF4_TARGETS_UP              | -0,069 | 0,06  | 0,01518 | 1 |

|                                        |        |       |         |   |
|----------------------------------------|--------|-------|---------|---|
| REACTOME_REVERSIBLE_HYDRATION_OF_CAF   | -0,069 | 0,06  | 0,05933 | 1 |
| MODULE_44                              | -0,069 | 0,06  | 0,02709 | 1 |
| GCM_MSN                                | -0,069 | 0,06  | 0,15888 | 1 |
| GSE9988_LOW_LPS_VS_ANTI_TREM1_AND_     | -0,069 | 0,06  | 0,08697 | 1 |
| PID_ANGIOPOIETINRECEPTOR_PATHWAY       | -0,069 | 0,06  | 0,02078 | 1 |
| PARK_HSC_AND_MULTIPOTENT_PROGENITOR:   | -0,069 | 0,06  | 0,01396 | 1 |
| GSE7460_CD8_TCELL_VS_CD4_TCELL_ACT_    | -0,069 | 0,06  | 0,03084 | 1 |
| CHEOK_RESPONSE_TO_MERCAPTOPURINE_AN    | -0,069 | 0,06  | 0,59203 | 1 |
| ACTIN_BINDING                          | -0,069 | 0,06  | 0,02908 | 1 |
| KEGG_BASE_EXCISION_REPAIR              | -0,069 | 0,06  | 0,02806 | 1 |
| MIKKELSEN_IPS_WITH_HCP_H3K27ME3        | -0,069 | 0,06  | 0,00757 | 1 |
| GENTLES_LEUKEMIC_STEM_CELL_UP          | -0,069 | 0,061 | 0,00712 | 1 |
| BIOCARTA_NOS1_PATHWAY                  | -0,069 | 0,061 | 0,05456 | 1 |
| MITOCHONDRIAL_RESPIRATORY_CHAIN_COMP   | 0,069  | 0,061 | 0,06141 | 1 |
| NADH_DEHYDROGENASE_COMPLEX             | 0,069  | 0,061 | 0,06141 | 1 |
| RESPIRATORY_CHAIN_COMPLEX_I            | 0,069  | 0,061 | 0,06141 | 1 |
| GSE7852_LN_VS_THYMUS_TREG_UP           | -0,069 | 0,061 | 0,01379 | 1 |
| INTERCALATED_DISC                      | 0,069  | 0,061 | 0,03178 | 1 |
| KYNG_DNA_DAMAGE_BY_UV                  | -0,069 | 0,061 | 0,09274 | 1 |
| GSE9988_ANTI_TREM1_AND_LPS_VS_CTRL_    | -0,069 | 0,061 | 0,02453 | 1 |
| GSE17721_CTRL_VS_GARDIQUIMOD_12H_BM    | -0,069 | 0,061 | 0,00737 | 1 |
| WATANABE_COLON_CANCER_MSI_VS_MSS_I     | -0,069 | 0,061 | 0,01319 | 1 |
| chr2q32                                | -0,069 | 0,061 | 0,00867 | 1 |
| PID_ARF6_PATHWAY                       | -0,069 | 0,061 | 0,0044  | 1 |
| chr2p12                                | -0,069 | 0,061 | 0,13435 | 1 |
| RANKIN_ANGIOGENIC_TARGETS_OF_VHL_HIF:  | 0,069  | 0,062 | 0,50574 | 1 |
| GSE20715_0H_VS_24H_OZONE_LUNG_UP       | -0,069 | 0,062 | 0,00769 | 1 |
| GGAANCGGAANY_UNKNOWN                   | -0,068 | 0,062 | 0,05841 | 1 |
| chr13q14                               | -0,068 | 0,062 | 0,03536 | 1 |
| GSE20366_CD103_POS_VS_CD103_KLRG1_     | -0,068 | 0,062 | 0,00229 | 1 |
| TAKAO_RESPONSE_TO_UVB_RADIATION_UP     | -0,068 | 0,062 | 0,13691 | 1 |
| BCAT_GDS748_UP                         | -0,068 | 0,062 | 0,00243 | 1 |
| REACTOME_RNA_POL_III_TRANSCRIPTION_INI | -0,068 | 0,062 | 0,13085 | 1 |
| ION_HOMEOSTASIS                        | -0,068 | 0,062 | 0,02921 | 1 |
| CHANGOLKAR_H2AFY_TARGETS_UP            | -0,068 | 0,062 | 0,06653 | 1 |
| MARIADASON_RESPONSE_TO_BUTYRATE_SUL    | -0,068 | 0,062 | 0,0011  | 1 |
| WANG_METASTASIS_OF_BREAST_CANCER_E:    | 0,068  | 0,062 | 0,6361  | 1 |
| KYNG_WERNER_SYNDROM_DN                 | -0,068 | 0,062 | 0,01095 | 1 |
| GSE13485_DAY1_VS_DAY3_YF17D_VACCINI    | -0,068 | 0,062 | 0,00242 | 1 |
| INFLAMMATORY_RESPONSE                  | -0,068 | 0,062 | 0,1104  | 1 |
| MURAKAMI_UV_RESPONSE_1HR_DN            | -0,068 | 0,062 | 0,03322 | 1 |
| LEE_LIVER_CANCER_CIPROFIBRATE_DN       | -0,068 | 0,063 | 0,01331 | 1 |

|                                        |        |       |         |   |
|----------------------------------------|--------|-------|---------|---|
| MITOCHONDRIAL_MEMBRANE_ORGANIZATION    | -0,068 | 0,063 | 0,04102 | 1 |
| GARGALOVIC_RESPONSE_TO_OXIDIZED_PHOS   | -0,068 | 0,063 | 0,01253 | 1 |
| PLASARI_NFIC_TARGETS_BASAL_UP          | -0,068 | 0,063 | 0,00026 | 1 |
| ATF2_S_UP.V1_DN                        | -0,068 | 0,063 | 0,00417 | 1 |
| chr12q14                               | -0,068 | 0,063 | 0,00463 | 1 |
| REACTOME_PKB_MEDIATED_EVENTS           | -0,068 | 0,063 | 0,01212 | 1 |
| SEMBA_FHIT_TARGETS_UP                  | -0,068 | 0,063 | 0,22492 | 1 |
| GSE14000_UNSTIM_VS_16H_LPS_DC_DN       | -0,068 | 0,063 | 0,21403 | 1 |
| GSE13485_CTRL_VS_DAY1_YF17D_VACCINE    | -0,068 | 0,063 | 0,00028 | 1 |
| LIPASE_ACTIVITY                        | -0,068 | 0,063 | 0,05162 | 1 |
| BOSCO_EPITHELIAL_DIFFERENTIATION_MODUL | -0,068 | 0,063 | 0,83877 | 1 |
| MODULE_573                             | -0,068 | 0,063 | 0,17227 | 1 |
| JI_CARCIANOGENESIS_BY_KRAS_AND_STK11_  | -0,068 | 0,063 | 0,02086 | 1 |
| GSE17580_TREG_VS_TEFF_DN               | -0,068 | 0,063 | 0,04019 | 1 |
| PID_IL8CXCR2_PATHWAY                   | -0,068 | 0,063 | 0,08179 | 1 |
| GSE17721_POLYIC_VS_GARDIQUIMOD_8H_BI   | -0,068 | 0,063 | 0,00458 | 1 |
| BIOCARTA_HDAC_PATHWAY                  | -0,068 | 0,063 | 0,00404 | 1 |
| MARTENS_BOUND_BY_PML_RARA_FUSION       | -0,068 | 0,064 | 0,00504 | 1 |
| TUOMISTO_TUMOR_SUPPRESSION_BY_COL13    | -0,068 | 0,064 | 0,0433  | 1 |
| BILANGES_RAPAMYCIN_SENSITIVE_VIA_TSC1  | -0,068 | 0,064 | 0,18529 | 1 |
| SINGLE_STRANDED_RNA_BINDING            | -0,068 | 0,064 | 0,04133 | 1 |
| GSE360_CTRL_VS_L_MAJOR_MAC_UP          | -0,068 | 0,064 | 0,01465 | 1 |
| TAKEDA_TARGETS_OF_NUP98_HOXA9_FUSIC    | -0,068 | 0,064 | 0,13085 | 1 |
| AMINE_BINDING                          | -0,068 | 0,064 | 0,0703  | 1 |
| MORF_PAPSS1                            | -0,068 | 0,064 | 0,83289 | 1 |
| REACTOME_CTNNB1_PHOSPHORYLATION_CA     | 0,068  | 0,064 | 0,08863 | 1 |
| GSE17974_IL4_AND_ANTI_IL12_VS_UNTREA   | -0,068 | 0,064 | 0,05299 | 1 |
| CARBOHYDRATE_METABOLIC_PROCESS         | -0,068 | 0,064 | 0,03808 | 1 |
| GSE22886_NAIVE_VS_MEMORY_TCELL_DN      | -0,068 | 0,064 | 0,04674 | 1 |
| YAO_TEMPORAL_RESPONSE_TO_PROGESTERC    | -0,068 | 0,064 | 0,07424 | 1 |
| POSITIVE_REGULATION_OF_TRANSLATION     | -0,068 | 0,064 | 0,0688  | 1 |
| CARBOXY_LYASE_ACTIVITY                 | 0,068  | 0,064 | 0,09572 | 1 |
| PID_BCR_5PATHWAY                       | -0,068 | 0,064 | 0,05957 | 1 |
| chr4q13                                | -0,068 | 0,064 | 0,08356 | 1 |
| GSE18791_CTRL_VS_NEWCASTLE_VIRUS_DC    | -0,068 | 0,064 | 0,16746 | 1 |
| GSE17974_CTRL_VS_ACT_IL4_AND_ANTI_IL   | -0,068 | 0,065 | 0,00019 | 1 |
| PROTEIN_PHOSPHATASE_TYPE_2A_REGULATI   | -0,068 | 0,065 | 0,38468 | 1 |
| YAMANAKA_GLIOMASTOMA_SURVIVAL_UP       | -0,068 | 0,065 | 0,32726 | 1 |
| SMALL_GTPASE_MEDIATED_SIGNAL_TRANSDI   | -0,068 | 0,065 | 0,00159 | 1 |
| REACTOME_THROMBIN_SIGNALLING_THROUGH   | -0,068 | 0,065 | 0,0044  | 1 |
| AKL_HTLV1_INFECTIION_UP                | -0,068 | 0,065 | 0,67572 | 1 |
| SERINE_TYPE_PEPTIDASE_ACTIVITY         | -0,068 | 0,065 | 0,00178 | 1 |

|                                        |        |       |         |   |
|----------------------------------------|--------|-------|---------|---|
| LIU_IL13_MEMORY_MODEL_UP               | -0,068 | 0,065 | 0,10716 | 1 |
| LEONARD_HYPOXIA                        | -0,068 | 0,065 | 0,04726 | 1 |
| EIF4E_DN                               | -0,068 | 0,065 | 0,12242 | 1 |
| INTRACELLULAR_PROTEIN_TRANSPORT        | -0,068 | 0,065 | 0,28736 | 1 |
| V\$SREBP1_01                           | -0,068 | 0,065 | 0,00775 | 1 |
| WAMUNYOKOLI_OVARIAN_CANCER_GRADES_     | -0,068 | 0,065 | 0,00531 | 1 |
| EMBRYONIC_MORPHOGENESIS                | -0,068 | 0,065 | 0,02016 | 1 |
| GSE17721_LPS_VS_CPG_0.5H_BMDM_DN       | -0,068 | 0,065 | 0,00772 | 1 |
| MAYBURD_RESPONSE_TO_L663536_UP         | -0,068 | 0,065 | 0,02996 | 1 |
| LI_WILMS_TUMOR_VS_FETAL_KIDNEY_2_DN    | -0,068 | 0,065 | 0,0053  | 1 |
| GSE360_CTRL_VS_L_DONOVANI_DC_UP        | -0,068 | 0,065 | 0,01896 | 1 |
| OHGUCHI_LIVER_HNF4A_TARGETS_DN         | -0,068 | 0,065 | 0,00806 | 1 |
| V\$PAX3_01                             | -0,068 | 0,065 | 0,01598 | 1 |
| GSE24026_PD1_LIGATION_VS_CTRL_IN_ACT   | -0,068 | 0,065 | 0,0533  | 1 |
| YIH_RESPONSE_TO_ARSENITE_C5            | -0,068 | 0,065 | 0,1683  | 1 |
| TESAR_JAK_TARGETS_MOUSE_ES_D3_DN       | -0,068 | 0,065 | 0,02691 | 1 |
| SANSOM_WNT_PATHWAY_REQUIRE_MYC         | -0,068 | 0,066 | 0,00815 | 1 |
| chr11p15                               | -0,067 | 0,066 | 0,00035 | 1 |
| GSE20715_0H_VS_48H_OZONE_LUNG_UP       | -0,067 | 0,066 | 0,00561 | 1 |
| ST_TYPE_I_INTERFERON_PATHWAY           | -0,067 | 0,066 | 0,22799 | 1 |
| GSE27786_CD4_VS_CD8_TCELL_UP           | -0,067 | 0,066 | 0,01564 | 1 |
| REACTOME_STEROID_HORMONES              | -0,067 | 0,066 | 0,01219 | 1 |
| CTCNANGTGNY_UNKNOWN                    | -0,067 | 0,066 | 0,00771 | 1 |
| GSE18791_UNSTIM_VS_NEWCATSLE_VIRUS_    | -0,067 | 0,066 | 0,00013 | 1 |
| GSE34205_HEALTHY_VS_FLU_INF_INFANT_P   | -0,067 | 0,066 | 0,34742 | 1 |
| LYSOSOME_ORGANIZATION_AND_BIOGENESIS   | 0,067  | 0,066 | 0,23857 | 1 |
| MATTIOLI_MULTIPLE_MYELOMA_WITH_14Q32   | -0,067 | 0,066 | 0,00145 | 1 |
| DER_IFN_GAMMA_RESPONSE_UP              | -0,067 | 0,066 | 0,20437 | 1 |
| PID_SMAD2_3NUCLEARPATHWAY              | -0,067 | 0,066 | 0,00046 | 1 |
| GSE360_LOW_DOSE_B_MALAYI_VS_M_TUBE     | -0,067 | 0,066 | 0,0042  | 1 |
| MORF_EI24                              | -0,067 | 0,067 | 0,82642 | 1 |
| GSE17721_CTRL_VS_CPG_0.5H_BMDM_UP      | -0,067 | 0,067 | 0,08815 | 1 |
| POSITIVE_REGULATION_OF_CYTOKINE_BIOSYI | -0,067 | 0,067 | 0,05741 | 1 |
| GTPASE_REGULATOR_ACTIVITY              | -0,067 | 0,067 | 0,00402 | 1 |
| BIOCARTA_ALK_PATHWAY                   | -0,067 | 0,067 | 0,00571 | 1 |
| CELLULAR_CATION_HOMEOSTASIS            | -0,067 | 0,067 | 0,0268  | 1 |
| LOPEZ_EPITHELIOID_MESOTHELIOMA         | -0,067 | 0,067 | 0,00745 | 1 |
| MODULE_97                              | -0,067 | 0,067 | 0,1202  | 1 |
| VANDESLUIS_NORMAL_EMBRYOS_UP           | -0,067 | 0,067 | 0,07797 | 1 |
| MODULE_367                             | -0,067 | 0,067 | 0,01752 | 1 |
| RAMPON_ENRICHED_LEARNING_ENVIRONMEN    | -0,067 | 0,067 | 0,00304 | 1 |
| V\$AP1_Q6_01                           | -0,067 | 0,067 | 0,03607 | 1 |

|                                       |        |       |         |   |
|---------------------------------------|--------|-------|---------|---|
| V\$FAC1_01                            | -0,067 | 0,067 | 0,00044 | 1 |
| GREGORY_SYNTHETIC_LETHAL_WITH_IMATINI | -0,067 | 0,067 | 0,01107 | 1 |
| PID_CD8TCRDOWNSTREAMPATHWAY           | -0,067 | 0,067 | 0,08689 | 1 |
| GSE17721_LPS_VS_POLYIC_12H_BMDM_DN    | -0,067 | 0,067 | 0,0875  | 1 |
| KEGG_FC_EPSILON_RI_SIGNALING_PATHWAY  | -0,067 | 0,068 | 0,02026 | 1 |
| MODULE_157                            | -0,067 | 0,068 | 0,03425 | 1 |
| MODULE_516                            | -0,067 | 0,068 | 0,03199 | 1 |
| HOSHIDA_LIVER_CANCER_LATE_RECURRENCE  | -0,067 | 0,068 | 0,00392 | 1 |
| GSE2706_UNSTIM_VS_2H_LPS_DC_DN        | -0,067 | 0,068 | 0,11556 | 1 |
| HOFMANN_MYELODYSPLASTIC_SYNDROM_RIS   | -0,067 | 0,068 | 0,00833 | 1 |
| SESTO_RESPONSE_TO_UV_C3               | -0,067 | 0,068 | 0,35936 | 1 |
| chr8q12                               | -0,067 | 0,068 | 0,08986 | 1 |
| YTCCNNGGAMR_UNKNOWN                   | -0,067 | 0,068 | 0,00263 | 1 |
| SMID_BREAST_CANCER_NORMAL_LIKE_DN     | 0,067  | 0,068 | 0,23221 | 1 |
| MEMBRANE_BOUND_VESICLE                | -0,067 | 0,068 | 0,00624 | 1 |
| PROTEIN_DOMAIN_SPECIFIC_BINDING       | -0,067 | 0,068 | 0,00015 | 1 |
| GSE22886_NAIVE_CD4_TCELL_VS_NEUTROP   | -0,067 | 0,068 | 0,14531 | 1 |
| REACTOME_THE_ROLE_OF_NEF_IN_HIV1_REF  | -0,067 | 0,068 | 0,10559 | 1 |
| HERNANDEZ_ABERRANT_MITOSIS_BY_DOCET   | -0,067 | 0,068 | 0,02334 | 1 |
| MODULE_261                            | -0,067 | 0,068 | 0,03392 | 1 |
| JIANG_HYPOXIA_NORMAL                  | -0,067 | 0,068 | 0,02739 | 1 |
| GSE17721_CTRL_VS_PAM3CSK4_6H_BMDM     | -0,067 | 0,068 | 0,00775 | 1 |
| REACTOME_GAP_JUNCTION_TRAFFICKING     | -0,067 | 0,069 | 0,78171 | 1 |
| IIZUKA_LIVER_CANCER_EARLY_RECURRENCE  | -0,067 | 0,069 | 0,04264 | 1 |
| GSE17721_LPS_VS_PAM3CSK4_8H_BMDM_L    | -0,067 | 0,069 | 0,01048 | 1 |
| KEGG_HEMATOPOIETIC_CELL_LINEAGE       | -0,067 | 0,069 | 0,0328  | 1 |
| TURASHVILI_BREAST_LOBULAR_CARCINOMA   | -0,067 | 0,069 | 0,01263 | 1 |
| PID_FRA_PATHWAY                       | -0,067 | 0,069 | 0,22897 | 1 |
| REACTOME_N_GLYCAN_ANTENNAE_ELONGA1    | -0,067 | 0,069 | 0,12503 | 1 |
| GSE10239_MEMORY_VS_DAY4.5_EFF_CD8_1   | -0,067 | 0,069 | 0,00102 | 1 |
| WANG_LSD1_TARGETS_UP                  | -0,067 | 0,069 | 0,00988 | 1 |
| GSE3337_CTRL_VS_4H_IFNG_IN_CD8POS_DC  | -0,067 | 0,069 | 0,09275 | 1 |
| MOREIRA_RESPONSE_TO_TSA_UP            | -0,067 | 0,069 | 0,0685  | 1 |
| GSE27786_LSK_VS_CD4_TCELL_DN          | -0,067 | 0,069 | 0,04258 | 1 |
| DACOSTA_LOW_DOSE_UV_RESPONSE_VIA_E    | -0,067 | 0,069 | 0,09141 | 1 |
| CAR_MLANA                             | -0,067 | 0,069 | 0,06771 | 1 |
| LYSOSOMAL_MEMBRANE                    | 0,067  | 0,069 | 0,06519 | 1 |
| LEIN_NEURON_MARKERS                   | -0,067 | 0,069 | 0,00459 | 1 |
| INTERLEUKIN_BINDING                   | -0,067 | 0,069 | 0,12441 | 1 |
| ICHIBA_GRAFT_VERSUS_HOST_DISEASE_D7_I | -0,067 | 0,069 | 0,00059 | 1 |
| GSE3982_MAST_CELL_VS_NEUTROPHIL_DN    | -0,067 | 0,069 | 0,00974 | 1 |
| MONOVALENT_INORGANIC_CATION_HOMEOST   | 0,066  | 0,07  | 0,90142 | 1 |

|                                       |        |       |         |   |
|---------------------------------------|--------|-------|---------|---|
| BIOCARTA_GLEEVEC_PATHWAY              | -0,066 | 0,07  | 0,00843 | 1 |
| chr8q23                               | -0,066 | 0,07  | 0,04902 | 1 |
| GSE360_CTRL_VS_L_DONOVANI_MAC_DN      | -0,066 | 0,07  | 0,08401 | 1 |
| V\$PAX5_01                            | -0,066 | 0,07  | 0,00036 | 1 |
| chr12q21                              | -0,066 | 0,07  | 0,00954 | 1 |
| REACTOME_G_PROTEIN_BETA_GAMMA_SIGNA   | -0,066 | 0,07  | 0,03317 | 1 |
| WAKABAYASHI_ADIPOGENESIS_PPARG_RXRA_  | -0,066 | 0,07  | 0,00073 | 1 |
| IVANOVA_HEMATOPOIESIS_LATE_PROGENITO  | -0,066 | 0,07  | 0,14829 | 1 |
| HYDROLASE_ACTIVITY_HYDROLYZING_N_GLY  | -0,066 | 0,071 | 0,00727 | 1 |
| GTTATAT,MIR-410                       | -0,066 | 0,071 | 0,03811 | 1 |
| GSE17721_0.5H_VS_24H_CPG_BMDM_UP      | -0,066 | 0,071 | 0,07032 | 1 |
| EHRlich_ICF_SYNDROM_UP                | -0,066 | 0,071 | 0,03805 | 1 |
| ST_GA13_PATHWAY                       | -0,066 | 0,071 | 0,09711 | 1 |
| GSE17974_0.5H_VS_72H_UNTREATED_IN_V   | -0,066 | 0,071 | 0,00603 | 1 |
| GSE13738_RESTING_VS_BYSTANDER_ACTIV/  | -0,066 | 0,071 | 0,00072 | 1 |
| chr16p13                              | 0,066  | 0,071 | 0,69748 | 1 |
| REACTOME_SIGNALING_BY_FGFR1_FUSION_M  | -0,066 | 0,071 | 0,08802 | 1 |
| RESPONSE_TO_NUTRIENT                  | 0,066  | 0,071 | 0,37295 | 1 |
| DAZARD_RESPONSE_TO_UV_SCC_UP          | -0,066 | 0,071 | 0,53842 | 1 |
| MODULE_109                            | -0,066 | 0,071 | 0,00444 | 1 |
| MAPKKK_CASCADE_GO_0000165             | -0,066 | 0,071 | 0,00247 | 1 |
| VITAMIN_TRANSPORT                     | -0,066 | 0,071 | 0,02862 | 1 |
| CHIARADONNA_NEOPLASTIC_TRANSFORMATI   | -0,066 | 0,071 | 0,01615 | 1 |
| MODY_HIPPOCAMPUS_POSTNATAL            | -0,066 | 0,071 | 0,00187 | 1 |
| CELL_RECOGNITION                      | -0,066 | 0,071 | 0,02188 | 1 |
| PROTEIN_TRANSPORT                     | -0,066 | 0,071 | 0,15465 | 1 |
| MORF_SOD1                             | -0,066 | 0,072 | 0,83384 | 1 |
| chr1p13                               | -0,066 | 0,072 | 0,01213 | 1 |
| PID_ERB_GENOMIC_PATHWAY               | -0,066 | 0,072 | 0,14392 | 1 |
| GSE17721_ALL_VS_24H_PAM3CSK4_BMDM_    | -0,066 | 0,072 | 0,07795 | 1 |
| SMIRNOV_RESPONSE_TO_IR_2HR_UP         | -0,066 | 0,072 | 0,06277 | 1 |
| chr17q22                              | -0,066 | 0,072 | 0,00172 | 1 |
| REACTOME_TRANSPORT_OF_ORGANIC_ANION   | -0,066 | 0,072 | 0,07763 | 1 |
| CALVET_IRINOTECAN_SENSITIVE_VS_REVERT | -0,066 | 0,072 | 0,04259 | 1 |
| GSE37416_CTRL_VS_6H_F_TULARENSIS_LV!  | -0,066 | 0,072 | 0,41219 | 1 |
| PALOMERO_GSI_SENSITIVITY_UP           | 0,066  | 0,072 | 0,3915  | 1 |
| CLAUS_PGR_POSITIVE_MENINGIOMA_UP      | -0,066 | 0,072 | 0,00647 | 1 |
| GNATENKO_PLATELET_SIGNATURE           | -0,066 | 0,072 | 0,22368 | 1 |
| EIF4E_UP                              | -0,066 | 0,072 | 0,20023 | 1 |
| KEGG_GALACTOSE_METABOLISM             | -0,066 | 0,072 | 0,76301 | 1 |
| GSE3982_MAST_CELL_VS_EFF_MEMORY_CD-   | -0,066 | 0,072 | 0,00299 | 1 |
| HUTTMANN_B_CLL_POOR_SURVIVAL_UP       | -0,066 | 0,072 | 0,00258 | 1 |



|                                       |        |       |         |   |
|---------------------------------------|--------|-------|---------|---|
| BERENJENO_TRANSFORMED_BY_RHOA_FOREV   | -0,066 | 0,073 | 0,00564 | 1 |
| AGING                                 | -0,066 | 0,073 | 0,0066  | 1 |
| WU_HBX_TARGETS_3_UP                   | -0,066 | 0,073 | 0,03414 | 1 |
| ABBUD_LIF_SIGNALING_2_UP              | -0,066 | 0,073 | 0,03809 | 1 |
| REACTOME_SEROTONIN_RECEPTORS          | -0,066 | 0,073 | 0,02942 | 1 |
| GSE3982_DC_VS_MAC_DN                  | -0,066 | 0,073 | 0,15127 | 1 |
| GSE3982_EOSINOPHIL_VS_BCELL_UP        | -0,066 | 0,073 | 0,00945 | 1 |
| WOUND_HEALING                         | -0,066 | 0,073 | 0,00047 | 1 |
| SCHAEFFER_PROSTATE_DEVELOPMENT_AND    | -0,066 | 0,073 | 0,4465  | 1 |
| BIOCARTA_P53HYPOXIA_PATHWAY           | -0,066 | 0,073 | 0,01161 | 1 |
| GSE22886_NAIVE_CD4_TCELL_VS_12H_ACT   | -0,066 | 0,073 | 0,80347 | 1 |
| GSE13411_SWITCHED_MEMORY_BCELL_VS_F   | -0,066 | 0,073 | 0,04658 | 1 |
| GARGALOVIC_RESPONSE_TO_OXIDIZED_PHOS  | -0,066 | 0,073 | 0,80911 | 1 |
| WALLACE_PROSTATE_CANCER_RACE_UP       | -0,066 | 0,073 | 0,04685 | 1 |
| TRANSFERASE_ACTIVITY_TRANSFERRING_ONI | -0,066 | 0,073 | 0,15829 | 1 |
| VALK_AML_CLUSTER_15                   | -0,066 | 0,073 | 0,04083 | 1 |
| EXTERNAL_SIDE_OF_PLASMA_MEMBRANE      | -0,066 | 0,073 | 0,03802 | 1 |
| BURTON_ADIPOGENESIS_PEAK_AT_OHR       | -0,066 | 0,073 | 0,00144 | 1 |
| chr9p22                               | -0,066 | 0,073 | 0,04064 | 1 |
| MODULE_116                            | 0,066  | 0,073 | 0,03995 | 1 |
| WEBER_METHYLATED_LCP_IN_FIBROBLAST_I  | -0,066 | 0,074 | 0,90022 | 1 |
| OXIDOREDUCTASE_ACTIVITY_ACTING_ON_NA  | 0,066  | 0,074 | 0,028   | 1 |
| RESPONSE_TO_EXTERNAL_STIMULUS         | -0,066 | 0,074 | 0,03966 | 1 |
| ONDER_CDH1_SIGNALING_VIA_CTNNB1       | -0,065 | 0,074 | 0,00866 | 1 |
| REGULATION_OF_HORMONE_SECRETION       | -0,065 | 0,074 | 0,14743 | 1 |
| chrXq12                               | -0,065 | 0,074 | 0,01943 | 1 |
| LUI_THYROID_CANCER_CLUSTER_3          | -0,065 | 0,074 | 0,08139 | 1 |
| REACTOME_PI_3K_CASCADE                | -0,065 | 0,074 | 0,0002  | 1 |
| MORF_RAGE                             | -0,065 | 0,075 | 0,00062 | 1 |
| ENZYME_BINDING                        | -0,065 | 0,075 | 0,00964 | 1 |
| BIOPOLYMER_CATABOLIC_PROCESS          | -0,065 | 0,075 | 0,38598 | 1 |
| chr8p12                               | -0,065 | 0,075 | 0,09818 | 1 |
| SHIN_B_CELL_LYMPHOMA_CLUSTER_8        | -0,065 | 0,075 | 0,39757 | 1 |
| GSE3982_DC_VS_NEUTROPHIL_LPS_STIM_DN  | -0,065 | 0,075 | 0,05287 | 1 |
| REACTOME_HDL_MEDIATED_LIPID_TRANSPOR  | -0,065 | 0,075 | 0,01866 | 1 |
| MODULE_245                            | -0,065 | 0,075 | 0,86482 | 1 |
| NADERI_BREAST_CANCER_PROGNOSIS_DN     | -0,065 | 0,075 | 0,00139 | 1 |
| CYTOKINE_METABOLIC_PROCESS            | -0,065 | 0,076 | 0,05775 | 1 |
| GSE3982_EOSINOPHIL_VS_NKCELL_UP       | -0,065 | 0,076 | 0,07432 | 1 |
| MULLIGHAN_NPM1_MUTATED_SIGNATURE_2_   | -0,065 | 0,076 | 0,00523 | 1 |
| AKT_UP_MTOR_DN.V1_UP                  | -0,065 | 0,076 | 0,12715 | 1 |
| FARMER_BREAST_CANCER_CLUSTER_6        | -0,065 | 0,076 | 0,05481 | 1 |

|                                      |        |       |         |   |
|--------------------------------------|--------|-------|---------|---|
| B_CELL_ACTIVATION                    | -0,065 | 0,076 | 0,06852 | 1 |
| RUFFLE                               | -0,065 | 0,076 | 0,04888 | 1 |
| KEGG_LYSOSOME                        | 0,065  | 0,076 | 0,07262 | 1 |
| GNF2_IGFBP1                          | -0,065 | 0,076 | 0,00716 | 1 |
| MANTOVANI_NFKB_TARGETS_UP            | -0,065 | 0,076 | 0,33326 | 1 |
| ELVIDGE_HIF2A_TARGETS_UP             | 0,065  | 0,076 | 0,43752 | 1 |
| TSENG_IRS1_TARGETS_DN                | -0,065 | 0,076 | 0,00593 | 1 |
| GSE14000_UNSTIM_VS_4H_LPS_DC_UP      | -0,065 | 0,077 | 0,00207 | 1 |
| LIU_SOX4_TARGETS_DN                  | -0,065 | 0,077 | 0,09024 | 1 |
| KREPPPEL_CD99_TARGETS_UP             | -0,065 | 0,077 | 0,52948 | 1 |
| CASTELLANO_NRAS_TARGETS_UP           | -0,065 | 0,077 | 0,13757 | 1 |
| HASLINGER_B_CLL_WITH_11Q23_DELETION  | -0,065 | 0,077 | 0,14621 | 1 |
| V\$USF_01                            | -0,065 | 0,077 | 0,03039 | 1 |
| BURTON_ADIPOGENESIS_12               | -0,065 | 0,077 | 0,15586 | 1 |
| chr12q13                             | -0,065 | 0,077 | 0,00293 | 1 |
| MODULE_240                           | -0,065 | 0,077 | 0,00156 | 1 |
| GSE17721_LPS_VS_PAM3CSK4_2H_BMDM_U   | -0,065 | 0,077 | 0,03883 | 1 |
| BOYLAN_MULTIPLE_MYELOMA_PCA1_UP      | -0,065 | 0,077 | 0,02805 | 1 |
| REACTOME_PI3K_CASCADE                | -0,065 | 0,077 | 0,00021 | 1 |
| PID_UPA_UPAR_PATHWAY                 | -0,065 | 0,077 | 0,10415 | 1 |
| MATZUK_POST-IMPLANTATION_AND_POST-P/ | -0,065 | 0,077 | 0,07967 | 1 |
| REACTOME_G_BETA_GAMMA_SIGNALLING_TH  | -0,065 | 0,077 | 0,06542 | 1 |
| RUTELLA_RESPONSE_TO_CSF2RB_AND_IL4_I | -0,065 | 0,077 | 0,20478 | 1 |
| GSE26928_CENTR_MEMORY_VS_CXCR5_POS   | -0,065 | 0,078 | 0,0077  | 1 |
| GSE26669_CTRL_VS_COSTIM_BLOCK_MLR_C  | -0,065 | 0,078 | 0,00248 | 1 |
| REGULATED_SECRETORY_PATHWAY          | 0,065  | 0,078 | 0,95579 | 1 |
| BIOCARTA_AT1R_PATHWAY                | -0,065 | 0,078 | 0,02862 | 1 |
| LAMELLIPODIUM                        | -0,065 | 0,078 | 0,00189 | 1 |
| REACTOME_DIABETES_PATHWAYS           | -0,065 | 0,078 | 0,13687 | 1 |
| LEADING_EDGE                         | -0,065 | 0,078 | 0,01908 | 1 |
| chr5q                                | 0,065  | 0,078 | 0,49743 | 1 |
| RIZ_ERYTHROID_DIFFERENTIATION_12HR   | -0,065 | 0,078 | 0,00034 | 1 |
| SULFUR_COMPOUND_BIOSYNTHETIC_PROCESS | -0,064 | 0,079 | 0,11928 | 1 |
| LEUKOCYTE_MIGRATION                  | -0,064 | 0,079 | 0,11409 | 1 |
| MODULE_334                           | -0,064 | 0,079 | 0,00062 | 1 |
| UBIQUITIN_LIGASE_COMPLEX             | -0,064 | 0,079 | 0,48085 | 1 |
| GSE37416_CTRL_VS_12H_F_TULARENSIS_L\ | -0,064 | 0,079 | 0,49169 | 1 |
| REACTOME_FORMATION_OF_INCISION_COMPL | 0,064  | 0,079 | 0,56115 | 1 |
| AMINO_SUGAR_METABOLIC_PROCESS        | -0,064 | 0,079 | 0,47669 | 1 |
| MODULE_190                           | -0,064 | 0,079 | 0,00113 | 1 |
| GGTGAAG,MIR-412                      | -0,064 | 0,079 | 0,04105 | 1 |
| MIKKELSEN_PARTIALLY_REPROGRAMMED_TO_ | -0,064 | 0,079 | 0,47402 | 1 |

|                                       |        |       |         |   |
|---------------------------------------|--------|-------|---------|---|
| RUTELLA_RESPONSE_TO_HGF_DN            | -0,064 | 0,079 | 0,02471 | 1 |
| CGCAAAA,MIR-450                       | -0,064 | 0,08  | 0,00738 | 1 |
| GSE30962_PRIMARY_VS_SECONDARY_CHROM   | -0,064 | 0,08  | 0,01591 | 1 |
| MODULE_547                            | -0,064 | 0,08  | 0,00057 | 1 |
| SESTO_RESPONSE_TO_UV_C5               | -0,064 | 0,08  | 0,21412 | 1 |
| GSE28237_EARLY_VS_LATE_GC_BCELL_UP    | -0,064 | 0,08  | 0,00307 | 1 |
| GSE1460_CD4_THYMOCYTE_VS_NAIVE_CD4    | -0,064 | 0,08  | 0,00423 | 1 |
| PROTEIN_AMINO_ACID_N_LINKED_GLYCOSYL  | -0,064 | 0,08  | 0,14509 | 1 |
| ATGTAA,MIR-302C                       | -0,064 | 0,08  | 0,01463 | 1 |
| CYTOKINE_BINDING                      | -0,064 | 0,08  | 0,09115 | 1 |
| MODULE_75                             | -0,064 | 0,08  | 0,04409 | 1 |
| MORF_ERH                              | -0,064 | 0,08  | 0,81118 | 1 |
| GSE22886_NAIVE_CD8_TCELL_VS_MEMORY_   | -0,064 | 0,081 | 0,03807 | 1 |
| REGULATION_OF_VIRAL_REPRODUCTION      | -0,064 | 0,081 | 0,28215 | 1 |
| GSE28237_EARLY_VS_LATE_GC_BCELL_DN    | -0,064 | 0,081 | 0,00399 | 1 |
| ONGUSAHA_BRCA1_TARGETS_DN             | -0,064 | 0,081 | 0,79124 | 1 |
| MORF_TPR                              | -0,064 | 0,081 | 0,16057 | 1 |
| V\$HNF1_Q6                            | -0,064 | 0,081 | 0,00285 | 1 |
| BCAT_BILD_ET_AL_DN                    | -0,064 | 0,081 | 0,04803 | 1 |
| ZHENG_FOXP3_TARGETS_IN_THYMUS_UP      | -0,064 | 0,081 | 0,0559  | 1 |
| GNF2_PCAF                             | 0,064  | 0,081 | 0,22177 | 1 |
| REACTOME_INTEGRATION_OF_ENERGY_META   | -0,064 | 0,081 | 0,00065 | 1 |
| GSE3982_MAC_VS_BASOPHIL_UP            | -0,064 | 0,081 | 0,07871 | 1 |
| NEGATIVE_REGULATION_OF_MULTICELLULAR  | -0,064 | 0,081 | 0,02094 | 1 |
| PROTEIN_LOCALIZATION                  | -0,064 | 0,081 | 0,05958 | 1 |
| KAUFFMANN_MELANOMA_RELAPSE_DN         | 0,064  | 0,081 | 0,63264 | 1 |
| REACTOME_DARPP_32_EVENTS              | -0,064 | 0,081 | 0,2774  | 1 |
| PID_CD8TCRPATHWAY                     | -0,064 | 0,081 | 0,08802 | 1 |
| GSE17974_IL4_AND_ANTI_IL12_VS_UNTREA  | -0,064 | 0,081 | 0,01665 | 1 |
| NIKOLSKY_BREAST_CANCER_7P15_AMPLICO   | -0,064 | 0,082 | 0,06358 | 1 |
| ZHANG_ANTIVIRAL_RESPONSE_TO_RIBAVIRIN | -0,064 | 0,082 | 0,02954 | 1 |
| V\$HNF4_Q6                            | -0,064 | 0,082 | 0,00028 | 1 |
| GSE37416_0H_VS_12H_F_TULARENSIS_LVS   | -0,064 | 0,082 | 0,18448 | 1 |
| CHESLER_BRAIN_D6MIT150_QTL_CIS        | 0,064  | 0,082 | 0,78303 | 1 |
| JOSEPH_RESPONSE_TO_SODIUM_BUTYRATE_I  | -0,064 | 0,082 | 0,00377 | 1 |
| MARTENS_TRETINOIN_RESPONSE_UP         | -0,064 | 0,082 | 0,00967 | 1 |
| MODULE_292                            | -0,064 | 0,082 | 0,07264 | 1 |
| TATCTGG,MIR-488                       | -0,064 | 0,082 | 0,03325 | 1 |
| FARMER_BREAST_CANCER_CLUSTER_4        | -0,064 | 0,082 | 0,4958  | 1 |
| TTGCACT,MIR-130A,MIR-301,MIR-130B     | -0,064 | 0,082 | 0,00966 | 1 |
| GNF2_JAK1                             | -0,064 | 0,082 | 0,05025 | 1 |
| LOCOMOTORY_BEHAVIOR                   | -0,064 | 0,083 | 0,1727  | 1 |

|                                      |        |       |         |   |
|--------------------------------------|--------|-------|---------|---|
| GSE2706_R848_VS_R848_AND_LPS_8H_STI  | -0,064 | 0,083 | 0,20474 | 1 |
| REACTOME_AMINO_ACID_SYNTHESIS_AND_IN | -0,064 | 0,083 | 0,90032 | 1 |
| BIOCARTA_TFF_PATHWAY                 | -0,064 | 0,083 | 0,29654 | 1 |
| ATGCACG,MIR-517B                     | -0,064 | 0,083 | 0,0533  | 1 |
| GSE17721_POLYIC_VS_PAM3CSK4_12H_BMI  | -0,064 | 0,083 | 0,17216 | 1 |
| PARK_APL_PATHOGENESIS_UP             | -0,064 | 0,083 | 0,22023 | 1 |
| GSE27786_LSK_VS_NKCELL_DN            | -0,064 | 0,083 | 0,01974 | 1 |
| TAANNYSGCG_UNKNOWN                   | -0,064 | 0,083 | 0,26378 | 1 |
| REACTOME_CHOLESTEROL_BIOSYNTHESIS    | -0,064 | 0,083 | 0,56535 | 1 |
| GUTIERREZ_WALDENSTROEMS_MACROGLOBUL  | -0,064 | 0,083 | 0,05578 | 1 |
| GNF2_MLF1                            | -0,064 | 0,083 | 0,04044 | 1 |
| GSE20366_CD103_POS_VS_NEG_TREG_KLRK  | -0,064 | 0,083 | 0,04046 | 1 |
| REACTOME_AUTODEGRADATION_OF_THE_E3   | -0,064 | 0,083 | 0,97083 | 1 |
| REGULATION_OF_NEUROTRANSMITTER_LEVEL | 0,063  | 0,083 | 0,9089  | 1 |
| VIRAL_REPRODUCTIVE_PROCESS           | -0,063 | 0,083 | 0,74545 | 1 |
| TTTGAC,MIR-19A,MIR-19B               | -0,063 | 0,083 | 0,00494 | 1 |
| VIRAL_INFECTIOUS_CYCLE               | -0,063 | 0,083 | 0,85647 | 1 |
| MULLIGHAN_NPM1_MUTATED_SIGNATURE_2_  | -0,063 | 0,083 | 0,01132 | 1 |
| chr17q                               | -0,063 | 0,084 | 0,07738 | 1 |
| RESPONSE_TO_STEROID_HORMONE_STIMULU: | 0,063  | 0,084 | 0,86157 | 1 |
| GSE29618_BCELL_VS_MDC_DN             | -0,063 | 0,084 | 0,10821 | 1 |
| TONKS_TARGETS_OF_RUNX1_RUNX1T1_FUSI  | -0,063 | 0,084 | 0,01091 | 1 |
| GSE36476_CTRL_VS_TSST_ACT_16H_MEMO   | -0,063 | 0,084 | 0,0079  | 1 |
| ATPASE_ACTIVITY_COUPLED              | -0,063 | 0,084 | 0,0246  | 1 |
| MORF_PPP1CA                          | -0,063 | 0,084 | 0,57988 | 1 |
| CRX_DN.V1_UP                         | -0,063 | 0,084 | 0,00015 | 1 |
| STARK_BRAIN_22Q11_DELETION           | -0,063 | 0,084 | 0,01476 | 1 |
| HAHTOLA_MYCOSIS_FUNGOIDES_CD4_UP     | -0,063 | 0,084 | 0,08609 | 1 |
| ROESSLER_LIVER_CANCER_METASTASIS_UP  | -0,063 | 0,084 | 0,21909 | 1 |
| STARK_PREFRONTAL_CORTEX_22Q11_DELET  | -0,063 | 0,084 | 0,22925 | 1 |
| MODULE_191                           | -0,063 | 0,084 | 0,12212 | 1 |
| N_ACETYLGLUCOSAMINE_METABOLIC_PROCE: | -0,063 | 0,085 | 0,30503 | 1 |
| V\$GABP_B                            | -0,063 | 0,085 | 0,05699 | 1 |
| chr20p11                             | 0,063  | 0,085 | 0,86336 | 1 |
| chr19q                               | -0,063 | 0,085 | 0,13628 | 1 |
| WANG_RESPONSE_TO_ANDROGEN_UP         | -0,063 | 0,085 | 0,0576  | 1 |
| VIRAL_REPRODUCTION                   | -0,063 | 0,085 | 0,61234 | 1 |
| GSE17721_LPS_VS_POLYIC_16H_BMDM_UP   | -0,063 | 0,085 | 0,08297 | 1 |
| KINASE_ACTIVATOR_ACTIVITY            | -0,063 | 0,085 | 0,12693 | 1 |
| RIBOSOME                             | -0,063 | 0,085 | 0,14033 | 1 |
| GSE17721_LPS_VS_CPG_2H_BMDM_DN       | -0,063 | 0,085 | 0,02484 | 1 |
| GSE17721_CTRL_VS_GARDIQUIMOD_1H_BMC  | -0,063 | 0,085 | 0,00967 | 1 |

|                                       |        |       |         |   |
|---------------------------------------|--------|-------|---------|---|
| REACTOME_NFKB_ACTIVATION_THROUGH_FA   | 0,063  | 0,085 | 0,15572 | 1 |
| GSE17721_CTRL_VS_POLYIC_12H_BMDM_UF   | -0,063 | 0,085 | 0,034   | 1 |
| RODRIGUES_DCC_TARGETS_UP              | 0,063  | 0,085 | 0,05515 | 1 |
| GSE17721_PAM3CSK4_VS_GADIQUIMOD_12H   | -0,063 | 0,085 | 0,11017 | 1 |
| DANG_MYC_TARGETS_DN                   | -0,063 | 0,085 | 0,04672 | 1 |
| SILIGAN_TARGETS_OF_EWS_FLI1_FUSION_DN | -0,063 | 0,086 | 0,0319  | 1 |
| GSE17721_PAM3CSK4_VS_GADIQUIMOD_4H    | -0,063 | 0,086 | 0,00241 | 1 |
| HINATA_NFKB_IMMUN_INF                 | -0,063 | 0,086 | 0,44843 | 1 |
| ACACTAC,MIR-142-3P                    | -0,063 | 0,086 | 0,08585 | 1 |
| GSE36392_TYPE_2_MYELOID_VS_NEUTROPH   | -0,063 | 0,086 | 0,0072  | 1 |
| GSE17721_CTRL_VS_GARDIQUIMOD_24H_BM   | -0,063 | 0,086 | 0,00085 | 1 |
| FATTY_ACID_BIOSYNTHETIC_PROCESS       | -0,063 | 0,086 | 0,14369 | 1 |
| GSE34205_RSV_VS_FLU_INF_INFANT_PBMC   | -0,063 | 0,086 | 0,16275 | 1 |
| ONO_AML1_TARGETS_DN                   | -0,063 | 0,086 | 0,09797 | 1 |
| chr4q                                 | -0,063 | 0,086 | 0,02179 | 1 |
| DACOSTA_UV_RESPONSE_VIA_ERCC3_UP      | -0,063 | 0,087 | 0,13354 | 1 |
| COULOUARN_TEMPORAL_TGFB1_SIGNATURE    | -0,063 | 0,087 | 0,00239 | 1 |
| LEE_LIVER_CANCER_DENA_DN              | -0,063 | 0,087 | 0,01756 | 1 |
| RHEIN_ALL_GLUCOCORTICOID_THERAPY_UP   | -0,063 | 0,087 | 0,10344 | 1 |
| JAATINEN_HEMATOPOIETIC_STEM_CELL_DN   | -0,063 | 0,087 | 0,06079 | 1 |
| PROTEASOME_COMPLEX                    | -0,063 | 0,087 | 0,81395 | 1 |
| GLINSKY_CANCER_DEATH_UP               | -0,063 | 0,087 | 0,72222 | 1 |
| GSE17974_CTRL_VS_ACT_IL4_AND_ANTI_IL  | -0,063 | 0,087 | 0,00317 | 1 |
| PATTERN_BINDING                       | -0,063 | 0,087 | 0,01754 | 1 |
| WEBER_METHYLATED_LCP_IN_SPERM_DN      | -0,063 | 0,087 | 0,7803  | 1 |
| TURJANSKI_MAPK14_TARGETS              | -0,063 | 0,087 | 0,00893 | 1 |
| GUTIERREZ_CHRONIC_LYMPHOCYTIC_LEUKEMI | -0,063 | 0,087 | 0,00398 | 1 |
| MELLMAN_TUT1_TARGETS_UP               | -0,063 | 0,087 | 0,72215 | 1 |
| GSE39820_TGFBETA1_IL6_VS_TGFBETA1_IL  | -0,063 | 0,087 | 0,06043 | 1 |
| TAVOR_CEBPA_TARGETS_DN                | -0,063 | 0,087 | 0,02138 | 1 |
| NAGASHIMA_NRG1_SIGNALING_DN           | -0,063 | 0,087 | 0,04518 | 1 |
| PID_KITPATHWAY                        | -0,063 | 0,087 | 0,02218 | 1 |
| GSE15930_STIM_VS_STIM_AND_IL-12_48H   | -0,063 | 0,087 | 0,02153 | 1 |
| CHEN_METABOLIC_SYNDROM_NETWORK        | -0,063 | 0,088 | 0,03597 | 1 |
| SMALL_GTPASE_BINDING                  | -0,063 | 0,088 | 0,188   | 1 |
| DORSAM_HOXA9_TARGETS_UP               | -0,063 | 0,088 | 0,00785 | 1 |
| MORF_KDR                              | -0,063 | 0,088 | 0,00154 | 1 |
| JI_RESPONSE_TO_FSH_DN                 | -0,063 | 0,088 | 0,37203 | 1 |
| VANASSE_BCL2_TARGETS_DN               | -0,063 | 0,088 | 0,01961 | 1 |
| GSE17721_CTRL_VS_POLYIC_0.5H_BMDM_U   | -0,063 | 0,088 | 0,0117  | 1 |
| NEUROPEPTIDE_RECEPTOR_ACTIVITY        | -0,062 | 0,088 | 0,02254 | 1 |
| GNF2_RAB7L1                           | -0,062 | 0,089 | 0,08592 | 1 |

|                                       |        |       |         |   |
|---------------------------------------|--------|-------|---------|---|
| MODULE_155                            | -0,062 | 0,089 | 0,78961 | 1 |
| CELLULAR_DEFENSE_RESPONSE             | -0,062 | 0,089 | 0,07785 | 1 |
| chr14q21                              | -0,062 | 0,089 | 0,00528 | 1 |
| NEGATIVE_REGULATION_OF_SIGNAL_TRANSD  | -0,062 | 0,089 | 0,00049 | 1 |
| MORF_MTA1                             | -0,062 | 0,089 | 0,82049 | 1 |
| KYNG_DNA_DAMAGE_BY_GAMMA_AND_UV_I     | -0,062 | 0,089 | 0,01289 | 1 |
| PLASARI_TGFB1_SIGNALING_VIA_NFIC_10HR | -0,062 | 0,089 | 0,02037 | 1 |
| GSE17974_0H_VS_12H_IN_VITRO_ACT_CD4   | -0,062 | 0,089 | 0,00152 | 1 |
| GSE3982_EOSINOPHIL_VS_DC_DN           | -0,062 | 0,089 | 0,20144 | 1 |
| GSE17721_LPS_VS_PAM3CSK4_24H_BMDM     | -0,062 | 0,089 | 0,01243 | 1 |
| REACTOME_ACETYLCHOLINE_BINDING_AND_I  | -0,062 | 0,089 | 0,27102 | 1 |
| CAFFAREL_RESPONSE_TO_THC_UP           | -0,062 | 0,089 | 0,29204 | 1 |
| VESICLE                               | -0,062 | 0,089 | 0,01023 | 1 |
| HADDAD_T_LYMPHOCYTE_AND_NK_PROGENI    | -0,062 | 0,089 | 0,04069 | 1 |
| REACTOME_SCF_BETA_TRCP_MEDIATED_DEG   | -0,062 | 0,089 | 0,99176 | 1 |
| RAS_GTPASE_BINDING                    | -0,062 | 0,09  | 0,33724 | 1 |
| RNA_HELICASE_ACTIVITY                 | -0,062 | 0,09  | 0,76803 | 1 |
| APPIERTO_RESPONSE_TO_FENRETINIDE_UP   | -0,062 | 0,09  | 0,22136 | 1 |
| GSE30083_SP1_VS_SP4_THYMOCYTE_DN      | -0,062 | 0,09  | 0,03011 | 1 |
| FUNG_IL2_SIGNALING_1                  | -0,062 | 0,09  | 0,27182 | 1 |
| IVANOVA_HEMATOPOIESIS_INTERMEDIATE_PR | -0,062 | 0,09  | 0,21662 | 1 |
| CYTOKINE_BIOSYNTHETIC_PROCESS         | -0,062 | 0,09  | 0,06037 | 1 |
| CROMER_METASTASIS_UP                  | -0,062 | 0,09  | 0,19064 | 1 |
| MURATA_VIRULENCE_OF_H_PILORI          | -0,062 | 0,09  | 0,51171 | 1 |
| ANGIOGENESIS                          | -0,062 | 0,091 | 0,08118 | 1 |
| chr1q12                               | -0,062 | 0,091 | 0,16169 | 1 |
| MORF_USP5                             | -0,062 | 0,091 | 0,88816 | 1 |
| GALI_TP53_TARGETS_APOPTOTIC_DN        | -0,062 | 0,091 | 0,7544  | 1 |
| MORF_FDXR                             | -0,062 | 0,091 | 0,00304 | 1 |
| GSE24142_DN2_VS_DN3_THYMOCYTE_ADUL    | -0,062 | 0,091 | 0,04078 | 1 |
| CYTOPLASMIC_VESICLE                   | -0,062 | 0,091 | 0,01062 | 1 |
| ST_ERK1_ERK2_MAPK_PATHWAY             | -0,062 | 0,091 | 0,12199 | 1 |
| MATZUK_EMBRYONIC_GERM_CELL            | -0,062 | 0,091 | 0,0085  | 1 |
| ROLEF_GLIS3_TARGETS                   | -0,062 | 0,091 | 0,00056 | 1 |
| REACTOME_AKT_PHOSPHORYLATES_TARGETS   | -0,062 | 0,091 | 0,00082 | 1 |
| GSE22886_NAIVE_CD8_TCELL_VS_NEUTROP   | -0,062 | 0,091 | 0,20762 | 1 |
| SHETH_LIVER_CANCER_VS_TXNIP_LOSS_PAM  | -0,062 | 0,091 | 0,00152 | 1 |
| MODULE_480                            | -0,062 | 0,091 | 0,00035 | 1 |
| GSE18791_CTRL_VS_NEWCASTLE_VIRUS_DC   | -0,062 | 0,092 | 0,26292 | 1 |
| BIOCARTA_TOB1_PATHWAY                 | -0,062 | 0,092 | 0,02758 | 1 |
| PID_TCR_PATHWAY                       | -0,062 | 0,092 | 0,08425 | 1 |
| REACTOME_GAP_JUNCTION_ASSEMBLY        | -0,062 | 0,092 | 0,92802 | 1 |

|                                      |        |       |         |   |
|--------------------------------------|--------|-------|---------|---|
| REACTOME_TRAF6_MEDIATED_INDUCTION_OF | -0,062 | 0,092 | 0,11311 | 1 |
| GSE39820_CTRL_VS_TGFBETA1_IL6_IL23A_ | -0,062 | 0,092 | 0,07431 | 1 |
| GSE3982_MAC_VS_BCELL_UP              | -0,062 | 0,092 | 0,3583  | 1 |
| REACTOME_SIGNAL_AMPLIFICATION        | -0,062 | 0,092 | 0,09146 | 1 |
| REACTOME_IMMUNE_SYSTEM               | -0,062 | 0,093 | 0,1522  | 1 |
| XU_HGF_SIGNALING_NOT_VIA_AKT1_48HR_I | -0,062 | 0,093 | 0,41518 | 1 |
| GNF2_BNIP2                           | -0,062 | 0,093 | 0,26003 | 1 |
| REACTOME_CDK_MEDIATED_PHOSPHORYLATI  | -0,062 | 0,093 | 0,98725 | 1 |
| V\$HNF1_01                           | -0,062 | 0,093 | 0,00027 | 1 |
| WANG_BARRETTS_ESOPHAGUS_UP           | -0,062 | 0,093 | 0,06212 | 1 |
| SHIN_B_CELL_LYMPHOMA_CLUSTER_6       | -0,061 | 0,094 | 0,64682 | 1 |
| ABBUD_LIF_SIGNALING_1_UP             | -0,061 | 0,094 | 0,06177 | 1 |
| PRODUCTION_OF_MOLECULAR_MEDIATOR_OF  | -0,061 | 0,094 | 0,0459  | 1 |
| REACTOME_COPI_MEDIATED_TRANSPORT     | 0,061  | 0,094 | 0,01679 | 1 |
| REACTOME_GRB2_SOS_PROVIDES_LINKAGE_  | -0,061 | 0,094 | 0,10258 | 1 |
| BIOCARTA_IGF1MTOR_PATHWAY            | -0,061 | 0,094 | 0,00155 | 1 |
| DEBOSSCHER_NFKB_TARGETS_REPRESSED_B  | -0,061 | 0,094 | 0,29536 | 1 |
| CHIANG_LIVER_CANCER_SUBCLASS_CTNNB1_ | -0,061 | 0,094 | 0,00021 | 1 |
| ENDODEOXYRIBONUCLEASE_ACTIVITY       | -0,061 | 0,094 | 0,36344 | 1 |
| GSE16755_CTRL_VS_IFNA_TREATED_MAC_D  | -0,061 | 0,094 | 0,24503 | 1 |
| GSE17721_LPS_VS_POLYIC_4H_BMDM_DN    | -0,061 | 0,094 | 0,06572 | 1 |
| GSE2826_WT_VS_BTK_KO_BCELL_DN        | -0,061 | 0,094 | 0,04795 | 1 |
| GSE14308_TH2_VS_TH17_DN              | -0,061 | 0,095 | 0,02357 | 1 |
| MODULE_73                            | -0,061 | 0,095 | 0,17017 | 1 |
| PML_BODY                             | -0,061 | 0,095 | 0,00312 | 1 |
| GSE13738_TCR_VS_BYSTANDER_ACTIVATED  | -0,061 | 0,095 | 0,03892 | 1 |
| SECRETION_BY_CELL                    | 0,061  | 0,095 | 0,81765 | 1 |
| BIOCARTA_FCER1_PATHWAY               | -0,061 | 0,095 | 0,03071 | 1 |
| chr1q21                              | -0,061 | 0,095 | 0,11694 | 1 |
| LANDIS_BREAST_CANCER_PROGRESSION_UP  | -0,061 | 0,095 | 0,8997  | 1 |
| BIOCARTA_WNT_PATHWAY                 | -0,061 | 0,095 | 0,00616 | 1 |
| BIOCARTA_UCALPAIN_PATHWAY            | -0,061 | 0,095 | 0,45981 | 1 |
| GOLGI_APPARATUS_PART                 | 0,061  | 0,095 | 0,16768 | 1 |
| NUCLEAR_REPLICATION_FORK             | -0,061 | 0,095 | 0,57812 | 1 |
| GSE24142_EARLY_THYMIC_PROGENITOR_VS_ | -0,061 | 0,095 | 0,02834 | 1 |
| MODULE_325                           | -0,061 | 0,095 | 0,00101 | 1 |
| XU_AKT1_TARGETS_48HR                 | -0,061 | 0,096 | 0,0396  | 1 |
| AMIT_EGF_RESPONSE_120_MCF10A         | -0,061 | 0,096 | 0,46082 | 1 |
| GSE17721_POLYIC_VS_PAM3CSK4_2H_BMDI  | -0,061 | 0,096 | 0,02512 | 1 |
| KOBAYASHI_EGFR_SIGNALING_6HR_DN      | -0,061 | 0,096 | 0,10048 | 1 |
| REACTOME_TRNA_AMINOACYLATION         | -0,061 | 0,096 | 0,81898 | 1 |
| GSE17721_PAM3CSK4_VS_CPG_2H_BMDM_I   | -0,061 | 0,096 | 0,06031 | 1 |

|                                       |        |       |         |   |
|---------------------------------------|--------|-------|---------|---|
| chr15q21                              | -0,061 | 0,096 | 0,04106 | 1 |
| IRITANI_MAD1_TARGETS_UP               | -0,061 | 0,096 | 0,09604 | 1 |
| REACTOME_PROSTACYCLIN_SIGNALLING_THR  | -0,061 | 0,097 | 0,09085 | 1 |
| FATTY_ACID_OXIDATION                  | -0,061 | 0,097 | 0,0198  | 1 |
| MULLIGAN_NTF3_SIGNALING_VIA_INSR_AND_ | -0,061 | 0,097 | 0,00235 | 1 |
| LIPOPROTEIN_METABOLIC_PROCESS         | 0,061  | 0,097 | 0,52503 | 1 |
| VERHAAK_GLIOMASTOMA_NEURAL            | -0,061 | 0,097 | 0,12914 | 1 |
| DEFENSE_RESPONSE                      | -0,061 | 0,097 | 0,08726 | 1 |
| BIOCARTA_ATRBRCA_PATHWAY              | -0,061 | 0,097 | 0,34424 | 1 |
| YANG_MUC2_TARGETS_DUODENUM_6MO_DN     | 0,061  | 0,097 | 0,45554 | 1 |
| CCACACA,MIR-147                       | -0,061 | 0,097 | 0,01168 | 1 |
| TCTCTCC,MIR-185                       | -0,061 | 0,098 | 0,01316 | 1 |
| JONES_TCOF1_TARGETS                   | 0,061  | 0,098 | 0,27426 | 1 |
| GSE24142_ADULT_VS_FETAL_DN2_THYMOG    | -0,061 | 0,098 | 0,02628 | 1 |
| GSE22886_NAIVE_CD4_TCELL_VS_MEMORY_   | -0,061 | 0,098 | 0,23777 | 1 |
| CHANDRAN_METASTASIS_TOP50_DN          | -0,061 | 0,098 | 0,00067 | 1 |
| GSE17721_LPS_VS_CPG_12H_BMDM_UP       | -0,061 | 0,098 | 0,0726  | 1 |
| chr3p21                               | 0,061  | 0,098 | 0,67129 | 1 |
| MORF_MAP2K2                           | -0,061 | 0,098 | 0,72923 | 1 |
| V\$TFIII_Q6                           | -0,061 | 0,098 | 0,00129 | 1 |
| REACTOME_CD28_DEPENDENT_VAV1_PATHV    | -0,061 | 0,098 | 0,14764 | 1 |
| SPHINGOID_METABOLIC_PROCESS           | 0,061  | 0,098 | 0,3428  | 1 |
| GSE6269_HEALTHY_VS_E_COLI_INF_PBMC_U  | -0,061 | 0,098 | 0,00358 | 1 |
| MIKKELSEN_ES_LCP_WITH_H3K4ME3         | -0,061 | 0,098 | 0,00153 | 1 |
| KHETCHOUMIAN_TRIM24_TARGETS_UP        | -0,061 | 0,098 | 0,05174 | 1 |
| MCCABE_HOXC6_TARGETS_UP               | -0,061 | 0,098 | 0,11741 | 1 |
| PID_ECADHERIN_STABILIZATION_PATHWAY   | -0,061 | 0,098 | 0,29861 | 1 |
| REACTOME_REGULATION_OF_INSULIN_SECRE  | -0,061 | 0,098 | 0,0041  | 1 |
| GSE11864_UNTREATED_VS_CSF1_IFNG_IN_M  | -0,061 | 0,098 | 0,48004 | 1 |
| GSE17721_0.5H_VS_24H_CPG_BMDM_DN      | -0,061 | 0,098 | 0,15687 | 1 |
| IMMUNE_SYSTEM_PROCESS                 | -0,061 | 0,099 | 0,09683 | 1 |
| GSE9037_WT_VS_IRAK4_KO_BMDM_UP        | -0,061 | 0,099 | 0,03981 | 1 |
| REACTOME_UNBLOCKING_OF_NMDA_RECEPT(   | -0,06  | 0,099 | 0,00426 | 1 |
| MOOHTA_FFA_OXYDATION                  | 0,06   | 0,099 | 0,44777 | 1 |
| NEGATIVE_REGULATION_OF_CELL_MIGRATION | -0,06  | 0,099 | 0,03246 | 1 |
| REACTOME_IMMUNOREGULATORY_INTERACTIC  | -0,06  | 0,099 | 0,20624 | 1 |
| NON_MEMBRANE_SPANNING_PROTEIN_TYROS   | -0,06  | 0,099 | 0,01356 | 1 |
| MOOHTA_ROS                            | 0,06   | 0,099 | 0,08831 | 1 |
| REGULATION_OF_BLOOD_PRESSURE          | -0,06  | 0,099 | 0,04091 | 1 |
| ATGTTTC,MIR-494                       | -0,06  | 0,099 | 0,00679 | 1 |
| GSE30083_SP2_VS_SP4_THYMOCYTE_DN      | -0,06  | 0,1   | 0,03191 | 1 |
| KENNY_CTNNB1_TARGETS_DN               | -0,06  | 0,1   | 0,00073 | 1 |



|                                       |       |       |         |   |
|---------------------------------------|-------|-------|---------|---|
| GSE17974_CTRL_VS_ACT_IL4_AND_ANTI_IL  | -0,06 | 0,1   | 0,0115  | 1 |
| BOCHKIS_FOXA2_TARGETS                 | -0,06 | 0,1   | 0,00098 | 1 |
| REGULATION_OF_CYTOKINE_BIOSYNTHETIC_P | -0,06 | 0,1   | 0,06538 | 1 |
| JOHANSSON_BRAIN_CANCER_EARLY_VS_LAT   | -0,06 | 0,1   | 0,04134 | 1 |
| REACTOME_PRESYNAPTIC_NICOTINIC_ACETYL | -0,06 | 0,1   | 0,22494 | 1 |
| REACTOME_CHYLOMICRON_MEDIATED_LIPID_  | -0,06 | 0,1   | 0,07022 | 1 |
| CYSTEINE_TYPE_PEPTIDASE_ACTIVITY      | -0,06 | 0,1   | 0,5819  | 1 |
| MODULE_108                            | -0,06 | 0,1   | 0,29858 | 1 |
| GSE37416_12H_VS_24H_F_TULARENSIS_LV   | -0,06 | 0,1   | 0,12863 | 1 |
| TCCCRNRTGC_UNKNOWN                    | -0,06 | 0,101 | 0,04001 | 1 |
| IKEDA_MIR133_TARGETS_DN               | -0,06 | 0,101 | 0,20022 | 1 |
| REACTOME_FGFR2C_LIGAND_BINDING_AND_/_ | -0,06 | 0,101 | 0,02734 | 1 |
| MODULE_288                            | -0,06 | 0,101 | 0,0229  | 1 |
| STK33_SKM_UP                          | -0,06 | 0,101 | 0,05125 | 1 |
| TBK1_DF_DN                            | -0,06 | 0,101 | 0,15635 | 1 |
| LOPEZ_MESOTHELIOMA_SURVIVAL_WORST_V   | -0,06 | 0,101 | 0,24952 | 1 |
| KMCATNNWGA_UNKNOWN                    | -0,06 | 0,101 | 0,02962 | 1 |
| KOINUMA_COLON_CANCER_MSI_DN           | -0,06 | 0,102 | 0,23876 | 1 |
| GSE360_DC_VS_MAC_T_GONDII_DN          | -0,06 | 0,102 | 0,10788 | 1 |
| REACTOME_IKK_COMPLEX_RECRUITMENT_MEI  | 0,06  | 0,102 | 0,28383 | 1 |
| SHIN_B_CELL_LYMPHOMA_CLUSTER_3        | -0,06 | 0,102 | 0,02327 | 1 |
| REACTOME_IRAK1_RECRUITS_IKK_COMPLEX   | -0,06 | 0,102 | 0,26705 | 1 |
| COURTOIS_SENESCENCE_TRIGGERS          | -0,06 | 0,102 | 0,25567 | 1 |
| GSE9006_TYPE_1_VS_TYPE_2_DIABETES_PE  | -0,06 | 0,102 | 0,08846 | 1 |
| chr3p12                               | -0,06 | 0,102 | 0,0184  | 1 |
| GSE339_CD8POS_VS_CD4CD8DN_DC_IN_CUI   | -0,06 | 0,102 | 0,13226 | 1 |
| GSE6269_FLU_VS_STREP_PNEUMO_INF_PBM   | -0,06 | 0,102 | 0,24932 | 1 |
| MODULE_474                            | -0,06 | 0,102 | 0,0027  | 1 |
| LIPID_KINASE_ACTIVITY                 | -0,06 | 0,102 | 0,26435 | 1 |
| GSE26928_NAIVE_VS_CENT_MEMORY_CD4_    | -0,06 | 0,102 | 0,00156 | 1 |
| MOREAUX_B_LYMPHOCYTE_MATURATION_BY    | -0,06 | 0,102 | 0,03176 | 1 |
| GSE360_L_DONOVANI_VS_L_MAJOR_DC_DN    | -0,06 | 0,102 | 0,0034  | 1 |
| REACTOME_PROLACTIN_RECEPTOR_SIGNALIN  | 0,06  | 0,102 | 0,92038 | 1 |
| GSE24634_IL4_VS_CTRL_TREATED_NAIVE_C  | -0,06 | 0,102 | 0,06213 | 1 |
| LINDGREN_BLADDER_CANCER_CLUSTER_1_UI  | -0,06 | 0,102 | 0,0033  | 1 |
| chr19p12                              | -0,06 | 0,102 | 0,02672 | 1 |
| V\$OCT1_01                            | -0,06 | 0,102 | 0,00435 | 1 |
| GSE27786_BCELL_VS_CD4_TCELL_UP        | -0,06 | 0,103 | 0,01946 | 1 |
| GSE5960_TH1_VS_ANERGIC_TH1_DN         | -0,06 | 0,103 | 0,11646 | 1 |
| GSE22886_NAIVE_CD4_TCELL_VS_DC_DN     | 0,06  | 0,103 | 0,02883 | 1 |
| VALK_AML_WITH_11Q23_REARRANGED        | -0,06 | 0,103 | 0,03132 | 1 |
| REGULATION_OF_CATABOLIC_PROCESS       | -0,06 | 0,103 | 0,00404 | 1 |

|                                      |        |       |         |   |
|--------------------------------------|--------|-------|---------|---|
| GSE3982_MAST_CELL_VS_BCELL_UP        | -0,06  | 0,103 | 0,11154 | 1 |
| MIDORIKAWA_AMPLIFIED_IN_LIVER_CANCER | -0,06  | 0,103 | 0,14093 | 1 |
| MODULE_262                           | -0,06  | 0,103 | 0,13301 | 1 |
| chr20q12                             | -0,06  | 0,103 | 0,09513 | 1 |
| MIKKELSEN_MCV6_ICP_WITH_H3K27ME3     | -0,06  | 0,103 | 0,03295 | 1 |
| GNF2_MSN                             | -0,06  | 0,103 | 0,37345 | 1 |
| GSE3982_MEMORY_CD4_TCELL_VS_BCELL_U  | -0,06  | 0,103 | 0,02072 | 1 |
| CROONQUIST_NRAS_VS_STROMAL_STIMULAT  | -0,06  | 0,103 | 0,02215 | 1 |
| BAE_BRCA1_TARGETS_UP                 | -0,06  | 0,103 | 0,1507  | 1 |
| INTERLEUKIN_RECEPTOR_ACTIVITY        | -0,06  | 0,103 | 0,19838 | 1 |
| REACTOME_NOREPINEPHRINE_NEUROTRANSMI | 0,06   | 0,103 | 0,88881 | 1 |
| FIGUEROA_AML_METHYLATION_CLUSTER_4_I | -0,06  | 0,104 | 0,09658 | 1 |
| AMINE_TRANSMEMBRANE_TRANSPORTER_AC   | -0,06  | 0,104 | 0,06308 | 1 |
| MORF_LTK                             | -0,06  | 0,104 | 0,00059 | 1 |
| HUANG_DASATINIB_RESISTANCE_DN        | 0,06   | 0,104 | 0,16614 | 1 |
| GSE14000_UNSTIM_VS_4H_LPS_DC_TRANSL  | -0,06  | 0,104 | 0,40425 | 1 |
| REACTOME_MTORC1_MEDIATED_SIGNALLING  | -0,06  | 0,104 | 0,20146 | 1 |
| GSE7852_TREG_VS_TCONV_THYMUS_DN      | -0,06  | 0,104 | 0,00037 | 1 |
| chr5q23                              | -0,06  | 0,104 | 0,00056 | 1 |
| chr10p14                             | -0,06  | 0,104 | 0,699   | 1 |
| BIOCARTA_STEM_PATHWAY                | -0,06  | 0,104 | 0,2582  | 1 |
| GSE11864_UNTREATED_VS_CSF1_PAM3CYS   | -0,06  | 0,105 | 0,01741 | 1 |
| MODULE_165                           | -0,06  | 0,105 | 0,12305 | 1 |
| TRIACYLGLYCEROL_METABOLIC_PROCESS    | -0,059 | 0,105 | 0,09995 | 1 |
| JIANG_AGING_CEREBRAL_CORTEX_DN       | -0,059 | 0,105 | 0,01618 | 1 |
| V\$IRF_Q6                            | -0,059 | 0,105 | 0,03742 | 1 |
| GTTNYYNNGGTNA_UNKNOWN                | -0,059 | 0,105 | 0,00097 | 1 |
| PROTEIN_FOLDING                      | -0,059 | 0,105 | 0,72011 | 1 |
| GSE14769_UNSTIM_VS_240MIN_LPS_BMDM   | -0,059 | 0,105 | 0,08946 | 1 |
| BYSTRYKH_HEMATOPOIESIS_STEM_CELL_ANC | -0,059 | 0,105 | 0,28108 | 1 |
| DACOSTA_UV_RESPONSE_VIA_ERCC3_COMM   | -0,059 | 0,105 | 0,0836  | 1 |
| GRAESSMANN_RESPONSE_TO_MC_AND_SERU   | -0,059 | 0,106 | 0,02597 | 1 |
| DIRMEIER_LMP1_RESPONSE_EARLY         | -0,059 | 0,106 | 0,03089 | 1 |
| BIOCARTA_NKT_PATHWAY                 | -0,059 | 0,106 | 0,13837 | 1 |
| GSE13484_UNSTIM_VS_YF17D_VACCINE_STI | -0,059 | 0,106 | 0,27954 | 1 |
| GSE3982_BASOPHIL_VS_TH2_UP           | -0,059 | 0,106 | 0,02245 | 1 |
| MODULE_19                            | -0,059 | 0,106 | 0,00085 | 1 |
| CARBOXYPEPTIDASE_ACTIVITY            | -0,059 | 0,106 | 0,00787 | 1 |
| GSE13306_TREG_VS_TCONV_SPLEEN_UP     | -0,059 | 0,106 | 0,00444 | 1 |
| chr7q36                              | -0,059 | 0,106 | 0,04357 | 1 |
| GSE27786_CD4_TCELL_VS_NEUTROPHIL_DN  | -0,059 | 0,106 | 0,00028 | 1 |
| GSE360_L_DONOVANI_VS_L_MAJOR_DC_UP   | -0,059 | 0,106 | 0,00395 | 1 |

|                                       |        |       |         |   |
|---------------------------------------|--------|-------|---------|---|
| CYTOKINE_PRODUCTION                   | -0,059 | 0,106 | 0,0472  | 1 |
| GSE12366_GC_BCELL_VS_PLASMA_CELL_DN   | -0,059 | 0,106 | 0,06594 | 1 |
| SYMPORTER_ACTIVITY                    | -0,059 | 0,107 | 0,61888 | 1 |
| SCHMIDT_POR_TARGETS_IN_LIMB_BUD_DN    | -0,059 | 0,107 | 0,00049 | 1 |
| BIOCARTA_VIP_PATHWAY                  | -0,059 | 0,107 | 0,00054 | 1 |
| ANASTASSIOU_CANCER_MESENCHYMAL_TRAI   | -0,059 | 0,107 | 0,0399  | 1 |
| GSE17721_CPG_VS_GARDIQUIMOD_16H_BME   | -0,059 | 0,107 | 0,06432 | 1 |
| ELVIDGE_HYPOXIA_DN                    | -0,059 | 0,107 | 0,25915 | 1 |
| GSE37416_12H_VS_48H_F_TULARENSIS_LV   | -0,059 | 0,107 | 0,00893 | 1 |
| NUNODA_RESPONSE_TO_DASATINIB_IMATINIF | -0,059 | 0,107 | 0,23656 | 1 |
| SCIAN_INVERSED_TARGETS_OF_TP53_AND_   | -0,059 | 0,107 | 0,25294 | 1 |
| REACTOME_MICRORNA_MIRNA_BIOGENESIS    | -0,059 | 0,108 | 0,61722 | 1 |
| KEEN_RESPONSE_TO_ROSIGLITAZONE_UP     | 0,059  | 0,108 | 0,91896 | 1 |
| GSE13306_TREG_VS_TCONV_LAMINA_PROPF   | -0,059 | 0,108 | 0,00428 | 1 |
| WILCOX_PRESPONSE_TO_ROGESTERONE_DN    | -0,059 | 0,108 | 0,01237 | 1 |
| MYLLYKANGAS_AMPLIFICATION_HOT_SPOT_2  | -0,059 | 0,108 | 0,59967 | 1 |
| REACTOME_G_BETA_GAMMA_SIGNALLING_TH   | -0,059 | 0,108 | 0,04069 | 1 |
| HOFFMANN_SMALL_PRE_BII_TO_IMMATURE_E  | -0,059 | 0,108 | 0,04818 | 1 |
| REACTOME_GLUCCONEOGENESIS             | 0,059  | 0,108 | 0,06689 | 1 |
| KEGG_TASTE_TRANSDUCTION               | -0,059 | 0,108 | 0,0275  | 1 |
| ISOPRENOID_METABOLIC_PROCESS          | -0,059 | 0,108 | 0,2593  | 1 |
| GSE30962_ACUTE_VS_CHRONIC_LCMV_PRIM   | -0,059 | 0,108 | 0,00834 | 1 |
| HEIDENBLAD_AMPLICON_8Q24_DN           | -0,059 | 0,108 | 0,07998 | 1 |
| GSE1460_INTRATHYMIC_T_PROGENITOR_VS_  | -0,059 | 0,109 | 0,00781 | 1 |
| CONRAD_GERMLINE_STEM_CELL             | -0,059 | 0,109 | 0,30697 | 1 |
| BIOCARTA_GH_PATHWAY                   | -0,059 | 0,109 | 0,01781 | 1 |
| REACTOME_ALPHA_LINOLENIC_ACID_ALA_MI  | -0,059 | 0,109 | 0,06341 | 1 |
| MODULE_241                            | -0,059 | 0,109 | 0,23384 | 1 |
| FEVR_CTNNB1_TARGETS_UP                | -0,059 | 0,109 | 0,01167 | 1 |
| BIOCARTA_IL6_PATHWAY                  | -0,059 | 0,109 | 0,04743 | 1 |
| GSE12366_GC_VS_NAIVE_BCELL_DN         | -0,059 | 0,109 | 0,01641 | 1 |
| REACTOME_SIGNALING_BY_ILS             | -0,059 | 0,109 | 0,20082 | 1 |
| PROTEIN_CATABOLIC_PROCESS             | -0,059 | 0,109 | 0,34484 | 1 |
| BIOCARTA_TH1TH2_PATHWAY               | -0,059 | 0,109 | 0,22533 | 1 |
| MODULE_151                            | -0,059 | 0,109 | 0,17706 | 1 |
| GSE22886_UNSTIM_VS_IL2_STIM_NKCELL_U  | -0,059 | 0,109 | 0,00042 | 1 |
| GSE10463_CD40L_AND_VA347_VS_CD40L_    | -0,059 | 0,11  | 0,02137 | 1 |
| WONG_ENDOMETRIAL_CANCER_LATE          | -0,059 | 0,11  | 0,04339 | 1 |
| REACTOME_ACTIVATION_OF_BH3_ONLY_PRC   | -0,059 | 0,11  | 0,01191 | 1 |
| VANDESLUIS_COMMD1_TARGETS_GROUP_4_I   | -0,059 | 0,11  | 0,00105 | 1 |
| KEGG_VIRAL_MYOCARDITIS                | -0,059 | 0,11  | 0,07672 | 1 |
| GSE1460_INTRATHYMIC_T_PROGENITOR_VS_  | -0,059 | 0,11  | 0,02202 | 1 |

|                                       |        |       |         |   |
|---------------------------------------|--------|-------|---------|---|
| FEMALE_PREGNANCY                      | -0,059 | 0,11  | 0,03216 | 1 |
| GSE17721_POLYIC_VS_PAM3CSK4_16H_BMI   | -0,059 | 0,11  | 0,0351  | 1 |
| BODY_FLUID_SECRETION                  | 0,059  | 0,11  | 0,2234  | 1 |
| CTCTATG,MIR-368                       | -0,059 | 0,11  | 0,00171 | 1 |
| FARMER_BREAST_CANCER_CLUSTER_8        | -0,059 | 0,11  | 0,09355 | 1 |
| REGULATION_OF_CELL_MORPHOGENESIS      | -0,059 | 0,11  | 0,05512 | 1 |
| RUIZ_TNC_TARGETS_UP                   | -0,059 | 0,111 | 0,00384 | 1 |
| MORF_REV3L                            | -0,059 | 0,111 | 0,16607 | 1 |
| FUNG_IL2_TARGETS_WITH_STAT5_BINDING_  | -0,058 | 0,111 | 0,17901 | 1 |
| CHENG_TAF7L_TARGETS                   | 0,058  | 0,111 | 0,23824 | 1 |
| MONNIER_POSTRADIATION_TUMOR_ESCAPE_I  | -0,058 | 0,111 | 0,0122  | 1 |
| MYLLYKANGAS_AMPLIFICATION_HOT_SPOT_7  | -0,058 | 0,112 | 0,27917 | 1 |
| GLUCOSAMINE_METABOLIC_PROCESS         | -0,058 | 0,112 | 0,33497 | 1 |
| WINTER_HYPOXIA_DN                     | -0,058 | 0,113 | 0,01026 | 1 |
| PROTEIN_PROCESSING                    | -0,058 | 0,113 | 0,04396 | 1 |
| REACTOME_REGULATED_PROTEOLYSIS_OF_P   | -0,058 | 0,113 | 0,00304 | 1 |
| REACTOME_ANDROGEN_BIOSYNTHESIS        | -0,058 | 0,113 | 0,17942 | 1 |
| MORF_NF1                              | -0,058 | 0,113 | 0,00855 | 1 |
| REACTOME_PLATELET_AGGREGATION_PLUG_   | -0,058 | 0,113 | 0,01024 | 1 |
| chr2q13                               | -0,058 | 0,113 | 0,3135  | 1 |
| chr4q23                               | -0,058 | 0,114 | 0,00072 | 1 |
| MORF_SKP1A                            | -0,058 | 0,114 | 0,84224 | 1 |
| GSE24634_NAIVE_CD4_TCELL_VS_DAY3_IL4  | -0,058 | 0,114 | 0,00036 | 1 |
| CYTOKINE_AND_CHEMOKINE_MEDIATED_SIGN  | -0,058 | 0,114 | 0,14555 | 1 |
| NUCLEOBASENUCLEOSIDE_AND_NUCLEOTIDE_  | -0,058 | 0,114 | 0,15966 | 1 |
| LIU_VAV3_PROSTATE_CARCINOGENESIS_DN   | -0,058 | 0,114 | 0,38751 | 1 |
| GSE17721_PAM3CSK4_VS_GADIQUIMOD_6H_   | -0,058 | 0,114 | 0,01344 | 1 |
| BIOCARTA_HIVNEF_PATHWAY               | -0,058 | 0,114 | 0,06239 | 1 |
| chr12q11                              | -0,058 | 0,114 | 0,04116 | 1 |
| RAFFEL_VEGFA_TARGETS_UP               | -0,058 | 0,114 | 0,80817 | 1 |
| WHITEHURST_PACLITAXEL_SENSITIVITY     | -0,058 | 0,114 | 0,00176 | 1 |
| SCHAEFFER_PROSTATE_DEVELOPMENT_AND_   | -0,058 | 0,115 | 0,00071 | 1 |
| REACTOME_NETRIN1_SIGNALING            | -0,058 | 0,115 | 0,01837 | 1 |
| PEPPER_CHRONIC_LYMPHOCYTIC_LEUKEMIA_I | -0,058 | 0,115 | 0,25576 | 1 |
| REACTOME_SYNTHESIS_OF_PA              | -0,058 | 0,115 | 0,01401 | 1 |
| GSE11864_CSF1_PAM3CYS_VS_CSF1_IFNG_   | -0,058 | 0,116 | 0,08522 | 1 |
| HO_LIVER_CANCER_VASCULAR_INVASION     | -0,058 | 0,116 | 0,05254 | 1 |
| GSE26495_NAIVE_VS_PD1HIGH_CD8_TCELL_  | -0,058 | 0,116 | 0,1056  | 1 |
| RAY_TUMORIGENESIS_BY_ERBB2_CDC25A_DI  | -0,058 | 0,116 | 0,00054 | 1 |
| REACTOME_MRNA_SPLICING_MINOR_PATHWA   | -0,058 | 0,116 | 0,75305 | 1 |
| MIKKELSEN_ES_ICP_WITH_H3K27ME3        | -0,058 | 0,116 | 0,02626 | 1 |
| MODULE_171                            | -0,058 | 0,116 | 0,09301 | 1 |

|                                        |        |       |         |   |
|----------------------------------------|--------|-------|---------|---|
| GSE14769_UNSTIM_VS_80MIN_LPS_BMDM_C    | -0,058 | 0,116 | 0,12044 | 1 |
| NIKOLSKY_BREAST_CANCER_16P13_AMPLI     | 0,058  | 0,116 | 0,69545 | 1 |
| SHIRAIISHI_PLZF_TARGETS_DN             | -0,058 | 0,117 | 0,10958 | 1 |
| REACTOME_P13OCAS_LINKAGE_TO_MAPK_S     | -0,057 | 0,117 | 0,14206 | 1 |
| LINDGREN_BLADDER_CANCER_CLUSTER_2A_    | -0,057 | 0,117 | 0,03866 | 1 |
| HYDROGEN_ION_TRANSMEMBRANE_TRANSP      | 0,057  | 0,117 | 0,05155 | 1 |
| REACTOME_REGULATION_OF_GENE_EXPRES     | -0,057 | 0,118 | 0,08345 | 1 |
| GTGCCAA,MIR-96                         | -0,057 | 0,118 | 0,0084  | 1 |
| GSE14769_UNSTIM_VS_360MIN_LPS_BMDM_    | -0,057 | 0,118 | 0,09091 | 1 |
| chr2q33                                | -0,057 | 0,119 | 0,05917 | 1 |
| N_TERMINAL_PROTEIN_AMINO_ACID_MODIF    | -0,057 | 0,119 | 0,56718 | 1 |
| GSE9988_LPS_VS_LPS_AND_ANTI_TREM1_M    | -0,057 | 0,119 | 0,15894 | 1 |
| MIKHAYLOVA_OXIDATIVE_STRESS_RESPONSE   | -0,057 | 0,119 | 0,69815 | 1 |
| ZHAN_V1_LATE_DIFFERENTIATION_GENES_UI  | 0,057  | 0,119 | 0,25397 | 1 |
| RESPONSE_TO_HEAT                       | 0,057  | 0,119 | 0,00628 | 1 |
| AMIT_EGF_RESPONSE_20_MCF10A            | -0,057 | 0,119 | 0,62483 | 1 |
| GSE18791_CTRL_VS_NEWCASTLE_VIRUS_DC    | -0,057 | 0,119 | 0,17461 | 1 |
| FOURNIER_ACINAR_DEVELOPMENT_EARLY_UF   | -0,057 | 0,119 | 0,00315 | 1 |
| GCM_DDX11                              | -0,057 | 0,119 | 0,014   | 1 |
| IVANOV_MUTATED_IN_COLON_CANCER         | -0,057 | 0,12  | 0,39318 | 1 |
| NIKOLSKY_BREAST_CANCER_20P13_AMPLI     | 0,057  | 0,12  | 0,57697 | 1 |
| chr6q27                                | 0,057  | 0,12  | 0,18874 | 1 |
| TGFB_UP.V1_DN                          | -0,057 | 0,12  | 0,00722 | 1 |
| GSE37416_0H_VS_6H_F_TULARENSIS_LVS_    | -0,057 | 0,12  | 0,53539 | 1 |
| SCHAEFFER_PROSTATE_DEVELOPMENT_AND_    | -0,057 | 0,12  | 0,3032  | 1 |
| GSE12845_PRE_GC_VS_DARKZONE_GC_TON     | -0,057 | 0,12  | 0,04904 | 1 |
| NEUROPEPTIDE_BINDING                   | -0,057 | 0,12  | 0,03129 | 1 |
| REACTOME_LIPID_DIGESTION_MOBILIZATION_ | -0,057 | 0,12  | 0,01088 | 1 |
| FALVELLA_SMOKERS_WITH_LUNG_CANCER      | -0,057 | 0,121 | 0,13678 | 1 |
| KEGG_NICOTINATE_AND_NICOTINAMIDE_MET   | -0,057 | 0,121 | 0,02228 | 1 |
| ACTIN_POLYMERIZATION_AND_OR_DEPOLYME   | -0,057 | 0,121 | 0,00198 | 1 |
| KYNG_WERNER_SYNDROM_AND_NORMAL_AG      | -0,057 | 0,121 | 0,01481 | 1 |
| KEGG_PRION_DISEASES                    | -0,057 | 0,121 | 0,04784 | 1 |
| MODULE_363                             | -0,057 | 0,121 | 0,66541 | 1 |
| MORF_MYST2                             | -0,057 | 0,121 | 0,02556 | 1 |
| GSE7460_TCONV_VS_TREG_THYMUS_UP        | -0,057 | 0,121 | 0,00819 | 1 |
| REACTOME_MHC_CLASS_II_ANTIGEN_PRESEN   | -0,057 | 0,121 | 0,45162 | 1 |
| REACTOME_AUTODEGRADATION_OF_CDH1_B     | -0,057 | 0,121 | 0,97013 | 1 |
| CGTCTTA,MIR-208                        | -0,057 | 0,121 | 0,16937 | 1 |
| GSE14769_UNSTIM_VS_120MIN_LPS_BMDM_    | -0,057 | 0,122 | 0,07471 | 1 |
| BIOCARTA_RNA_PATHWAY                   | -0,057 | 0,122 | 0,36914 | 1 |
| VALK_AML_CLUSTER_1                     | -0,057 | 0,122 | 0,00801 | 1 |

|                                        |        |       |         |   |
|----------------------------------------|--------|-------|---------|---|
| BONOME_OVARIAN_CANCER_SURVIVAL_OPTI    | -0,057 | 0,123 | 0,00169 | 1 |
| GSE14000_TRANSLATED_RNA_VS_MRNA_16     | -0,057 | 0,123 | 0,05266 | 1 |
| GSE3982_BCELL_VS_CENT_MEMORY_CD4_T     | -0,057 | 0,123 | 0,11499 | 1 |
| LEE_EARLY_T_LYMPHOCYTE_DN              | -0,057 | 0,123 | 0,04294 | 1 |
| EXOCYTOSIS                             | 0,057  | 0,123 | 0,86768 | 1 |
| LU_IL4_SIGNALING                       | -0,056 | 0,123 | 0,09102 | 1 |
| HOFMANN_MYELODYSPLASTIC_SYNDROM_HIC    | -0,056 | 0,123 | 0,09302 | 1 |
| ACEVEDO_NORMAL_TISSUE_ADJACENT_TO_I    | -0,056 | 0,124 | 0,02684 | 1 |
| REACTOME_THROMBOXANE_SIGNALLING_THR    | -0,056 | 0,124 | 0,05295 | 1 |
| chr2q14                                | -0,056 | 0,124 | 0,30321 | 1 |
| LAMB_CCND1_TARGETS                     | -0,056 | 0,124 | 0,15006 | 1 |
| TORCHIA_TARGETS_OF_EWSR1_FLI1_FUSION   | -0,056 | 0,124 | 0,00072 | 1 |
| MODULE_495                             | -0,056 | 0,124 | 0,00135 | 1 |
| BASSO_CD40_SIGNALING_UP                | -0,056 | 0,124 | 0,15    | 1 |
| REGULATION_OF_TRANSLATIONAL_INITIATION | -0,056 | 0,124 | 0,41166 | 1 |
| KIM_GERMINAL_CENTER_T_HELPER_DN        | -0,056 | 0,124 | 0,01035 | 1 |
| MAHADEVAN_RESPONSE_TO_MP470_DN         | -0,056 | 0,124 | 0,01863 | 1 |
| SOTIRIOU_BREAST_CANCER_GRADE_1_VS_3    | 0,056  | 0,124 | 0,23168 | 1 |
| SIMBULAN_PARP1_TARGETS_UP              | -0,056 | 0,124 | 0,00883 | 1 |
| GSE17721_0.5H_VS_12H_PAM3CSK4_BMDM     | -0,056 | 0,125 | 0,00954 | 1 |
| SHARMA_PILOCYTIC_ASTROCYTOMA_LOCALI    | -0,056 | 0,125 | 0,16035 | 1 |
| BIOCARTA_GCR_PATHWAY                   | -0,056 | 0,125 | 0,18093 | 1 |
| GSE3982_MAST_CELL_VS_CENT_MEMORY_C     | -0,056 | 0,125 | 0,23517 | 1 |
| GNF2_ITGAL                             | -0,056 | 0,125 | 0,06088 | 1 |
| MODULE_150                             | -0,056 | 0,125 | 0,03348 | 1 |
| GSE360_HIGH_DOSE_B_MALAYI_VS_M_TUBE    | -0,056 | 0,125 | 0,51861 | 1 |
| LUI_TARGETS_OF_PAX8_PPARG_FUSION       | -0,056 | 0,125 | 0,19157 | 1 |
| KIM_ALL_DISORDERS_DURATION_CORR_UP     | -0,056 | 0,125 | 0,20554 | 1 |
| HORMONE_METABOLIC_PROCESS              | -0,056 | 0,125 | 0,01749 | 1 |
| GNF2_CD7                               | -0,056 | 0,126 | 0,06372 | 1 |
| GSE13484_UNSTIM_VS_3H_YF17D_VACCINE    | -0,056 | 0,126 | 0,35616 | 1 |
| HOSHIDA_LIVER_CANCER_SURVIVAL_DN       | 0,056  | 0,126 | 0,66749 | 1 |
| BIOCARTA_FAS_PATHWAY                   | -0,056 | 0,126 | 0,19774 | 1 |
| DI___TRI_VALENT_INORGANIC_CATION_TRAN  | -0,056 | 0,126 | 0,03941 | 1 |
| MYLLYKANGAS_AMPLIFICATION_HOT_SPOT_2   | -0,056 | 0,126 | 0,02095 | 1 |
| GAVIN_FOXP3_TARGETS_CLUSTER_T4         | -0,056 | 0,126 | 0,16587 | 1 |
| CELLULAR_RESPONSE_TO_STRESS            | -0,056 | 0,126 | 0,23264 | 1 |
| MORF_IKKBG                             | -0,056 | 0,126 | 0,01341 | 1 |
| GSE22886_NAIVE_TCELL_VS_NEUTROPHIL_C   | -0,056 | 0,127 | 0,28815 | 1 |
| CARDOSO_RESPONSE_TO_GAMMA_RADIATION    | -0,056 | 0,127 | 0,01239 | 1 |
| REACTOME_ABORTIVE_ELONGATION_OF_HIV'   | -0,056 | 0,127 | 0,55804 | 1 |
| GSE29614_CTRL_VS_DAY3_TIV_FLU_VACCII   | -0,056 | 0,127 | 0,00421 | 1 |

|                                       |        |       |         |   |
|---------------------------------------|--------|-------|---------|---|
| VANHARANTA_UTERINE_FIBROID_WITH_7Q_C  | -0,056 | 0,127 | 0,11056 | 1 |
| NEGATIVE_REGULATION_OF_HYDROLASE_AC   | -0,056 | 0,127 | 0,58236 | 1 |
| CUI_TCF21_TARGETS_2_DN                | -0,056 | 0,127 | 0,0188  | 1 |
| OVULATION_CYCLE                       | -0,056 | 0,127 | 0,30374 | 1 |
| GSE14769_UNSTIM_VS_60MIN_LPS_BMDM_C   | -0,056 | 0,127 | 0,14147 | 1 |
| REACTOME_PYRUVATE_METABOLISM          | -0,056 | 0,127 | 0,80503 | 1 |
| MODULE_208                            | -0,056 | 0,127 | 0,09135 | 1 |
| BCAT.100_UP.V1_UP                     | -0,056 | 0,127 | 0,01637 | 1 |
| CHOW_RASSF1_TARGETS_DN                | -0,056 | 0,127 | 0,25877 | 1 |
| MIKKELSEN_IPS_HCP_WITH_H3_UNMETHYLAT  | -0,056 | 0,127 | 0,00137 | 1 |
| chr11q25                              | -0,056 | 0,128 | 0,00503 | 1 |
| REACTOME_COMMON_PATHWAY               | -0,056 | 0,128 | 0,0452  | 1 |
| REACTOME_HS_GAG_DEGRADATION           | -0,056 | 0,128 | 0,02353 | 1 |
| REACTOME_NEF_MEDIATES_DOWN_MODULAT    | -0,056 | 0,128 | 0,22114 | 1 |
| V\$STAT6_02                           | -0,056 | 0,128 | 0,00209 | 1 |
| MTOR_UP.N4.V1_DN                      | -0,056 | 0,128 | 0,00028 | 1 |
| GSE17721_CTRL_VS_GARDIQUIMOD_4H_BMC   | -0,056 | 0,129 | 0,00025 | 1 |
| REACTOME_N_GLYCAN_ANTENNAE_ELONGAT    | -0,056 | 0,129 | 0,14075 | 1 |
| IMMUNE_RESPONSE                       | -0,056 | 0,129 | 0,13138 | 1 |
| PID_NETRIN_PATHWAY                    | -0,056 | 0,129 | 0,25836 | 1 |
| CELLULAR_LOCALIZATION                 | -0,056 | 0,129 | 0,08578 | 1 |
| WANG_LMO4_TARGETS_DN                  | -0,056 | 0,129 | 0,06395 | 1 |
| MODULE_436                            | -0,056 | 0,129 | 0,09028 | 1 |
| JAERVINEN_AMPLIFIED_IN_LARYNGEAL_CANC | 0,056  | 0,129 | 0,30735 | 1 |
| SHARMA_ASTROCYTOMA_WITH_NF1_SYNDRC    | -0,056 | 0,129 | 0,00199 | 1 |
| GSE17974_IL4_AND_ANTI_IL12_VS_UNTREA  | -0,056 | 0,129 | 0,00249 | 1 |
| GENTILE_UV_RESPONSE_CLUSTER_D9        | -0,056 | 0,13  | 0,03679 | 1 |
| MODULE_299                            | -0,056 | 0,13  | 0,7185  | 1 |
| SENGUPTA_EBNA1_ANTICORRELATED         | -0,056 | 0,13  | 0,01248 | 1 |
| CELLULAR_PROTEIN_COMPLEX_ASSEMBLY     | -0,055 | 0,13  | 0,03354 | 1 |
| LEE_LIVER_CANCER_ACOX1_DN             | -0,055 | 0,13  | 0,06144 | 1 |
| chr2q24                               | -0,055 | 0,13  | 0,05048 | 1 |
| KAAB_FAILED_HEART_ATRIUM_DN           | -0,055 | 0,131 | 0,4234  | 1 |
| REACTOME_ACTIVATION_OF_CHAPERONES_B   | 0,055  | 0,131 | 0,05073 | 1 |
| GSE11864_UNTREATED_VS_CSF1_IFNG_PAM   | -0,055 | 0,131 | 0,01086 | 1 |
| chr14q22                              | -0,055 | 0,131 | 0,03754 | 1 |
| GSE17721_CTRL_VS_PAM3CSK4_4H_BMDM_    | -0,055 | 0,131 | 0,01634 | 1 |
| WCAANNNYCAG_UNKNOWN                   | -0,055 | 0,131 | 0,00034 | 1 |
| chr11p13                              | -0,055 | 0,131 | 0,52507 | 1 |
| ZHANG_TLX_TARGETS_36HR_UP             | -0,055 | 0,131 | 0,00523 | 1 |
| ELLWOOD_MYC_TARGETS_DN                | 0,055  | 0,131 | 0,02701 | 1 |
| GSE14308_TH1_VS_TH17_DN               | -0,055 | 0,131 | 0,00207 | 1 |

|                                                                     |        |       |         |   |
|---------------------------------------------------------------------|--------|-------|---------|---|
| AMIT_DELAYED_EARLY_GENES                                            | -0,055 | 0,131 | 0,01016 | 1 |
| GSE13411_PLASMA_CELL_VS_MEMORY_BCEI                                 | -0,055 | 0,131 | 0,03579 | 1 |
| REACTOME_DESTABILIZATION_OF_MRNA_BY_VALK_AML_WITH_CEBPA             | -0,055 | 0,132 | 0,87259 | 1 |
| DER_IFN_BETA_RESPONSE_UP                                            | -0,055 | 0,132 | 0,33705 | 1 |
| CAFFAREL_RESPONSE_TO_THC_8HR_3_DN                                   | -0,055 | 0,132 | 0,68522 | 1 |
| V\$AHRARNT_02                                                       | -0,055 | 0,132 | 0,01881 | 1 |
| PROTEIN_SERINE_THREONINE_PHOSPHATASE_GSE13306_TREG_VS_TCONV_UP      | -0,055 | 0,132 | 0,00297 | 1 |
| T_CELL_DIFFERENTIATION                                              | -0,055 | 0,133 | 0,11953 | 1 |
| chr3q27                                                             | -0,055 | 0,133 | 0,38227 | 1 |
| MARIADASON_RESPONSE_TO_CURCUMIN_SUL                                 | -0,055 | 0,133 | 0,45313 | 1 |
| GSE17721_0.5H_VS_4H_PAM3CSK4_BMDM_GAGCTGG,MIR-337                   | -0,055 | 0,133 | 0,06384 | 1 |
| SCHLINGEMANN_SKIN_CARCINOGENESIS_TPA                                | -0,055 | 0,133 | 0,00192 | 1 |
| chr5p12                                                             | -0,055 | 0,134 | 0,73425 | 1 |
| POSITIVE_REGULATION_OF_CYTOSKELETON_DIRMEIER_LMP1_RESPONSE_LATE_DN  | -0,055 | 0,134 | 0,18641 | 1 |
| chr1q31                                                             | -0,055 | 0,134 | 0,00216 | 1 |
| KEGG_INOSITOL_PHOSPHATE_METABOLISM                                  | -0,055 | 0,134 | 0,17516 | 1 |
| BIOCARTA_HER2_PATHWAY                                               | 0,055  | 0,134 | 0,16503 | 1 |
| chr7q33                                                             | -0,055 | 0,134 | 0,02143 | 1 |
| GCM_MYST2                                                           | -0,055 | 0,135 | 0,98876 | 1 |
| WANG_CLIM2_TARGETS_DN                                               | -0,055 | 0,135 | 0,85658 | 1 |
| REACTOME_TAK1_ACTIVATES_NFKB_BY_PHC                                 | -0,055 | 0,135 | 0,1676  | 1 |
| GSE3982_CENT_MEMORY_CD4_TCELL_VS_TIL                                | -0,055 | 0,135 | 0,54985 | 1 |
| LINDSTEDT_DENDRITIC_CELL_MATURATION_MODULE_114                      | -0,055 | 0,135 | 0,33846 | 1 |
| GSE17974_CTRL_VS_ACT_IL4_AND_ANTI_IL                                | -0,055 | 0,135 | 0,00374 | 1 |
| GSE14000_4H_VS_16H_LPS_DC_TRANSLATION                               | -0,055 | 0,135 | 0,56657 | 1 |
| ZHAN_MULTIPLE_MYELOMA_MF_DN                                         | -0,055 | 0,136 | 0,2096  | 1 |
| GSE15930_NAIVE_VS_24H_IN_VITRO_STIM                                 | -0,055 | 0,136 | 0,02096 | 1 |
| GSE360_L_DONOVANI_VS_M_TUBERCULOSIS                                 | -0,054 | 0,137 | 0,00891 | 1 |
| BIOCARTA_RAB_PATHWAY                                                | -0,054 | 0,137 | 0,05157 | 1 |
| GSE24142_DN2_VS_DN3_THYMOCYTE_DN                                    | -0,054 | 0,137 | 0,11942 | 1 |
| WENDT_COHESIN_TARGETS_UP                                            | -0,054 | 0,137 | 0,00741 | 1 |
| BCAT.100_UP.V1_DN                                                   | -0,054 | 0,137 | 0,07939 | 1 |
| GSE17974_0H_VS_1H_IN_VITRO_ACT_CD4_THYROID_HORMONE_RECEPTOR_BINDING | -0,054 | 0,138 | 0,4767  | 1 |
| OXFORD_RALB_TARGETS_UP                                              | -0,054 | 0,138 | 0,04767 | 1 |
| BIOCARTA_INFLAM_PATHWAY                                             | -0,054 | 0,138 | 0,00522 | 1 |
| GSE3982_DC_VS_BCELL_UP                                              | -0,054 | 0,138 | 0,00522 | 1 |
|                                                                     | -0,054 | 0,138 | 0,36177 | 1 |
|                                                                     | -0,054 | 0,138 | 0,00429 | 1 |
|                                                                     | -0,054 | 0,138 | 0,00429 | 1 |
|                                                                     | -0,054 | 0,138 | 0,01163 | 1 |
|                                                                     | -0,054 | 0,138 | 0,01163 | 1 |
|                                                                     | -0,054 | 0,138 | 0,43816 | 1 |
|                                                                     | -0,054 | 0,139 | 0,43816 | 1 |
|                                                                     | -0,054 | 0,139 | 0,06328 | 1 |
|                                                                     | -0,054 | 0,139 | 0,06328 | 1 |
|                                                                     | -0,054 | 0,139 | 0,26913 | 1 |
|                                                                     | -0,054 | 0,139 | 0,26913 | 1 |
|                                                                     | -0,054 | 0,139 | 0,18921 | 1 |
|                                                                     | -0,054 | 0,139 | 0,18921 | 1 |



|                                       |        |       |         |   |
|---------------------------------------|--------|-------|---------|---|
| CYTOCHROME_C_OXIDASE_ACTIVITY         | 0,054  | 0,139 | 0,32525 | 1 |
| LI_CYTIDINE_ANALOG_PATHWAY            | -0,054 | 0,139 | 0,73879 | 1 |
| MODULE_345                            | -0,054 | 0,139 | 0,12666 | 1 |
| GSE17721_LPS_VS_POLYIC_2H_BMDM_DN     | -0,054 | 0,139 | 0,01693 | 1 |
| KEGG_APOPTOSIS                        | -0,054 | 0,139 | 0,19556 | 1 |
| POSITIVE_REGULATION_OF_PROTEIN_AMINO_ | -0,054 | 0,139 | 0,0072  | 1 |
| GSE30083_SP3_VS_SP4_THYMOCYTE_DN      | -0,054 | 0,139 | 0,0939  | 1 |
| PID_NFKAPPABATYPICALPATHWAY           | -0,054 | 0,14  | 0,09909 | 1 |
| GSE360_L_DONOVANI_VS_B_MALAYI_LOW_    | -0,054 | 0,14  | 0,069   | 1 |
| ICOSANOID_METABOLIC_PROCESS           | -0,054 | 0,141 | 0,01963 | 1 |
| YOSHIMURA_MAPK8_TARGETS_DN            | -0,054 | 0,141 | 0,08355 | 1 |
| MODULE_427                            | -0,054 | 0,141 | 0,00017 | 1 |
| CLATHRIN_COATED_VESICLE               | -0,054 | 0,142 | 0,18645 | 1 |
| LI_INDUCED_T_TO_NATURAL_KILLER_UP     | -0,054 | 0,142 | 0,08988 | 1 |
| GSE360_DC_VS_MAC_B_MALAYI_HIGH_DOSE   | -0,054 | 0,142 | 0,20082 | 1 |
| CGCTGCT,MIR-503                       | -0,054 | 0,142 | 0,04142 | 1 |
| VARELA_ZMPSTE24_TARGETS_DN            | -0,054 | 0,142 | 0,01475 | 1 |
| KEGG_GLYCEROPHOSPHOLIPID_METABOLISM   | -0,054 | 0,142 | 0,00789 | 1 |
| REACTOME_CYTOSOLIC_TRNA_AMINOACYLAT   | -0,054 | 0,142 | 0,31614 | 1 |
| MCLACHLAN_DENTAL_CARIES_DN            | -0,054 | 0,142 | 0,27846 | 1 |
| MODULE_440                            | -0,054 | 0,142 | 0,4089  | 1 |
| TAKEDA_TARGETS_OF_NUP98_HOXA9_FUSIC   | -0,054 | 0,142 | 0,55478 | 1 |
| GSE14350_TREG_VS_TEFF_IN_IL2RB_KO_UP  | -0,054 | 0,143 | 0,02878 | 1 |
| GAUSSMANN_MLL_AF4_FUSION_TARGETS_B_   | 0,054  | 0,143 | 0,36558 | 1 |
| BIOCARTA_EXTRINSIC_PATHWAY            | -0,054 | 0,143 | 0,0046  | 1 |
| GSE360_T_GONDII_VS_B_MALAYI_LOW_DOS   | -0,054 | 0,143 | 0,03172 | 1 |
| WIEMANN_TELOMERE_SHORTENING_AND_CHF   | -0,054 | 0,143 | 0,33698 | 1 |
| GSE17974_IL4_AND_ANTI_IL12_VS_UNTREA  | -0,054 | 0,143 | 0,0064  | 1 |
| GSE17721_POLYIC_VS_PAM3CSK4_24H_BMI   | -0,054 | 0,143 | 0,18655 | 1 |
| MODULE_134                            | -0,054 | 0,144 | 0,11762 | 1 |
| MODULE_177                            | -0,054 | 0,144 | 0,25186 | 1 |
| GSE360_CTRL_VS_B_MALAYI_HIGH_DOSE_M   | -0,054 | 0,144 | 0,10701 | 1 |
| chr6q16                               | -0,054 | 0,144 | 0,78098 | 1 |
| REGULATION_OF_SMALL_GTPASE_MEDIATED_  | -0,054 | 0,144 | 0,07485 | 1 |
| GNF2_HPX                              | 0,054  | 0,144 | 0,70023 | 1 |
| chrxp11                               | 0,054  | 0,145 | 0,14804 | 1 |
| PID_CONE_PATHWAY                      | -0,053 | 0,145 | 0,06126 | 1 |
| ST_TUMOR_NECROSIS_FACTOR_PATHWAY      | -0,053 | 0,145 | 0,24654 | 1 |
| ABDULRAHMAN_KIDNEY_CANCER_VHL_UP      | -0,053 | 0,145 | 0,70567 | 1 |
| REGULATION_OF_CELL_SHAPE              | -0,053 | 0,145 | 0,07607 | 1 |
| KRASNOSELSKAYA_ILF3_TARGETS_UP        | -0,053 | 0,145 | 0,15691 | 1 |
| PID_IL5_PATHWAY                       | -0,053 | 0,146 | 0,12787 | 1 |

|                                       |        |       |         |   |
|---------------------------------------|--------|-------|---------|---|
| GSE9988_LPS_VS_CTRL_TREATED_MONOCY    | -0,053 | 0,146 | 0,09678 | 1 |
| KEGG_FOLATE_BIOSYNTHESIS              | -0,053 | 0,146 | 0,23042 | 1 |
| MODULE_326                            | -0,053 | 0,146 | 0,02624 | 1 |
| HAHTOLA_MYCOSIS_FUNGOIDES_UP          | -0,053 | 0,146 | 0,59644 | 1 |
| REGULATION_OF_INTERFERON_GAMMA_BIOSY  | -0,053 | 0,146 | 0,19196 | 1 |
| GSE360_CTRL_VS_M_TUBERCULOSIS_MAC_U   | -0,053 | 0,146 | 0,02362 | 1 |
| NUCLEAR_EXPORT                        | -0,053 | 0,146 | 0,37581 | 1 |
| GSE20366_CD103_KLRG1_DP_VS_DN_TREG    | -0,053 | 0,146 | 0,06089 | 1 |
| BIOCARTA_IGF1R_PATHWAY                | -0,053 | 0,146 | 0,00277 | 1 |
| GTAGGCA,MIR-189                       | -0,053 | 0,146 | 0,17935 | 1 |
| VESICULAR_FRACTION                    | 0,053  | 0,147 | 0,42084 | 1 |
| GSE3982_EOSINOPHIL_VS_EFF_MEMORY_CD4  | -0,053 | 0,147 | 0,15337 | 1 |
| FARMER_BREAST_CANCER_CLUSTER_7        | 0,053  | 0,147 | 0,64516 | 1 |
| KEGG_SNARE_INTERACTIONS_IN_VESICULAR_ | 0,053  | 0,147 | 0,3447  | 1 |
| REACTOME_REGULATORY_RNA_PATHWAYS      | -0,053 | 0,147 | 0,4803  | 1 |
| KERLEY_RESPONSE_TO_CISPLATIN_UP       | -0,053 | 0,147 | 0,00241 | 1 |
| PID_IL27PATHWAY                       | -0,053 | 0,147 | 0,13897 | 1 |
| LEE_DIFFERENTIATING_T_LYMPHOCYTE      | -0,053 | 0,147 | 0,03854 | 1 |
| GSE17721_LPS_VS_POLYIC_24H_BMDM_DN    | -0,053 | 0,147 | 0,02338 | 1 |
| LEE_CALORIE_RESTRICTION_MUSCLE_DN     | -0,053 | 0,147 | 0,39124 | 1 |
| BIOCARTA_TCRA_PATHWAY                 | -0,053 | 0,147 | 0,09698 | 1 |
| BIOCARTA_DEATH_PATHWAY                | -0,053 | 0,148 | 0,05916 | 1 |
| FATTY_ACID_METABOLIC_PROCESS          | -0,053 | 0,148 | 0,00085 | 1 |
| GSE29614_CTRL_VS_TIV_FLU_VACCINE_PBM  | -0,053 | 0,148 | 0,00134 | 1 |
| P53_DN.V2_DN                          | -0,053 | 0,148 | 0,00596 | 1 |
| VALK_AML_CLUSTER_16                   | -0,053 | 0,148 | 0,00038 | 1 |
| BIOCARTA_CSK_PATHWAY                  | -0,053 | 0,148 | 0,07939 | 1 |
| MIKKELSEN_NPC_ICP_WITH_H3K27ME3       | 0,053  | 0,148 | 0,55467 | 1 |
| ATCTTGC,MIR-31                        | -0,053 | 0,148 | 0,04369 | 1 |
| V\$ICSBP_Q6                           | -0,053 | 0,149 | 0,0584  | 1 |
| ELVIDGE_HIF1A_TARGETS_DN              | -0,053 | 0,149 | 0,80168 | 1 |
| KEGG_TERPENOID_BACKBONE_BIOSYNTHESIS  | 0,053  | 0,149 | 0,10894 | 1 |
| PID_IL12_2PATHWAY                     | -0,053 | 0,149 | 0,17924 | 1 |
| PID_TNFPATHWAY                        | -0,053 | 0,149 | 0,12485 | 1 |
| PROTEIN_TETRAMERIZATION               | -0,053 | 0,149 | 0,00306 | 1 |
| GSE14000_UNSTIM_VS_4H_LPS_DC_DN       | -0,053 | 0,149 | 0,40529 | 1 |
| CHIANG_LIVER_CANCER_SUBCLASS_UNANNO   | -0,053 | 0,149 | 0,60185 | 1 |
| GSE6269_E_COLI_VS_STREP_PNEUMO_INF_P  | -0,053 | 0,15  | 0,41727 | 1 |
| AMIT_EGF_RESPONSE_40_MCF10A           | -0,053 | 0,15  | 0,00621 | 1 |
| MODULE_86                             | -0,053 | 0,15  | 0,28007 | 1 |
| REACTOME_FATTY_ACID_TRIACYLGLYCEROL_  | -0,053 | 0,15  | 0,09487 | 1 |
| CHYLA_CBFA2T3_TARGETS_UP              | -0,053 | 0,151 | 0,00863 | 1 |

|                                              |        |       |         |   |
|----------------------------------------------|--------|-------|---------|---|
| GSE14000_UNSTIM_VS_16H_LPS_DC_UP             | -0,053 | 0,151 | 0,0656  | 1 |
| MODULE_180                                   | 0,053  | 0,151 | 0,48718 | 1 |
| GNF2_RAD23A                                  | -0,053 | 0,151 | 0,18009 | 1 |
| PID_IFNGPATHWAY                              | -0,053 | 0,151 | 0,314   | 1 |
| RODWELL_AGING_KIDNEY_NO_BLOOD_DN             | -0,053 | 0,151 | 0,00385 | 1 |
| YAGI_AML_WITH_T_9_11_TRANSLOCATION           | -0,053 | 0,151 | 0,00602 | 1 |
| LEE_CALORIE_RESTRICTION_MUSCLE_UP            | -0,053 | 0,151 | 0,10749 | 1 |
| MODULE_233                                   | -0,053 | 0,151 | 0,89738 | 1 |
| MODULE_76                                    | -0,053 | 0,152 | 0,38934 | 1 |
| KRAS.KIDNEY_UP.V1_DN                         | -0,053 | 0,152 | 0,03166 | 1 |
| SANSOM_APC_TARGETS_DN                        | -0,053 | 0,152 | 0,02563 | 1 |
| GSE14000_TRANSLATED_RNA_VS_MRNA_4H           | -0,053 | 0,152 | 0,10057 | 1 |
| BIOCARTA_IL17_PATHWAY                        | -0,053 | 0,152 | 0,09109 | 1 |
| REACTOME_EFFECTS_OF_PIP2_HYDROLYSIS          | -0,052 | 0,153 | 0,02598 | 1 |
| YEGNASUBRAMANIAN_PROSTATE_CANCER             | -0,052 | 0,153 | 0,10731 | 1 |
| INTERLEUKIN_1_SECRETION                      | 0,052  | 0,153 | 0,90078 | 1 |
| WU_HBX_TARGETS_2_DN                          | -0,052 | 0,153 | 0,47905 | 1 |
| chr1p11                                      | -0,052 | 0,153 | 0,40425 | 1 |
| NEUROTRANSMITTER_SECRETION                   | 0,052  | 0,153 | 0,738   | 1 |
| ANCHORED_TO_MEMBRANE                         | -0,052 | 0,153 | 0,0435  | 1 |
| ANCHORED_TO_PLASMA_MEMBRANE                  | -0,052 | 0,153 | 0,0435  | 1 |
| GSE1432_CTRL_VS_IFNG_1H_MICROGLIA_DN         | -0,052 | 0,153 | 0,11222 | 1 |
| GSE17721_POLYIC_VS_PAM3CSK4_4H_BMDM          | -0,052 | 0,153 | 0,03739 | 1 |
| chr22q13                                     | -0,052 | 0,154 | 0,22662 | 1 |
| GSE3982_DC_VS_MAC_UP                         | -0,052 | 0,154 | 0,02574 | 1 |
| KIM_ALL_DISORDERS_DURATION_CORR_DN           | -0,052 | 0,154 | 0,25937 | 1 |
| CALVET_IRINOTECAN_SENSITIVE_VS_REVERT        | -0,052 | 0,154 | 0,00019 | 1 |
| POSITIVE_REGULATION_OF_MAP_KINASE_ACTIVATION | -0,052 | 0,154 | 0,17503 | 1 |
| INTERFERON_GAMMA_BIOSYNTHETIC_PROCESSING     | -0,052 | 0,154 | 0,20429 | 1 |
| BIOCARTA_IL3_PATHWAY                         | -0,052 | 0,154 | 0,01787 | 1 |
| BIOCARTA_TCYTOTOXIC_PATHWAY                  | -0,052 | 0,154 | 0,10951 | 1 |
| TRNA_PROCESSING                              | -0,052 | 0,155 | 0,7296  | 1 |
| GCM_DFFA                                     | -0,052 | 0,155 | 0,17741 | 1 |
| MODULE_84                                    | -0,052 | 0,155 | 0,12513 | 1 |
| GTGTTGA,MIR-505                              | -0,052 | 0,155 | 0,06902 | 1 |
| chr10q23                                     | -0,052 | 0,155 | 0,00614 | 1 |
| GARGALOVIC_RESPONSE_TO_OXIDIZED_PHOSPHATE    | -0,052 | 0,155 | 0,01286 | 1 |
| GSE17721_CTRL_VS_GARDIQUIMOD_4H_BMDM         | -0,052 | 0,155 | 0,09926 | 1 |
| MODULE_42                                    | 0,052  | 0,155 | 0,14739 | 1 |
| GSE17721_4_VS_24H_CPG_BMDM_UP                | -0,052 | 0,155 | 0,07595 | 1 |
| BRACHAT_RESPONSE_TO_CISPLATIN                | 0,052  | 0,156 | 0,59486 | 1 |
| LYSOSOMAL_TRANSPORT                          | 0,052  | 0,156 | 0,56963 | 1 |

|                                       |        |       |         |   |
|---------------------------------------|--------|-------|---------|---|
| CHAN_INTERFERON_PRODUCING_DENDRITIC_C | -0,052 | 0,156 | 0,13377 | 1 |
| FUJIWARA_PARK2_IN_LIVER_CANCER_UP     | -0,052 | 0,156 | 0,16916 | 1 |
| GSE27786_BCELL_VS_NKTCELL_DN          | -0,052 | 0,157 | 0,10351 | 1 |
| REACTOME_HIGHLY_CALCIUM_PERMEABLE_PC  | -0,052 | 0,157 | 0,42117 | 1 |
| REGULATION_OF_PH                      | 0,052  | 0,157 | 0,67929 | 1 |
| REGULATION_OF_JNK_ACTIVITY            | -0,052 | 0,157 | 0,17222 | 1 |
| PID_IL12_STAT4PATHWAY                 | -0,052 | 0,157 | 0,13896 | 1 |
| chr2p11                               | -0,052 | 0,157 | 0,29987 | 1 |
| HOLLEMAN_ASPARAGINASE_RESISTANCE_ALI  | -0,052 | 0,157 | 0,2937  | 1 |
| GSE3982_MEMORY_CD4_TCELL_VS_TH1_UP    | -0,052 | 0,157 | 0,00099 | 1 |
| GSE6269_E_COLI_VS_STREP_AUREUS_INF_PI | -0,052 | 0,157 | 0,38007 | 1 |
| GTPASE_BINDING                        | -0,052 | 0,157 | 0,24234 | 1 |
| GSE3982_DC_VS_NKCELL_UP               | -0,052 | 0,158 | 0,26827 | 1 |
| GSE12366_NAIVE_VS_MEMORY_BCELL_DN     | -0,052 | 0,158 | 0,04593 | 1 |
| DASU_IL6_SIGNALING_DN                 | -0,052 | 0,158 | 0,02716 | 1 |
| ATTACAT,MIR-380-3P                    | -0,052 | 0,158 | 0,14513 | 1 |
| GSE36392_EOSINOPHIL_VS_NEUTROPHIL_IL2 | -0,052 | 0,158 | 0,03935 | 1 |
| GCM_HBP1                              | -0,052 | 0,158 | 0,39421 | 1 |
| GSE22886_DC_VS_MONOCYTE_DN            | -0,052 | 0,158 | 0,10063 | 1 |
| RESPONSE_TO_BIOTIC_STIMULUS           | -0,052 | 0,159 | 0,25065 | 1 |
| REGULATION_OF_TRANSPORT               | -0,052 | 0,159 | 0,01169 | 1 |
| TAKEDA_TARGETS_OF_NUP98_HOXA9_FUSIC   | -0,052 | 0,159 | 0,30663 | 1 |
| ENDOPLASMIC_RETICULUM                 | -0,052 | 0,159 | 0,28348 | 1 |
| DALESSIO_TSA_RESPONSE                 | -0,052 | 0,159 | 0,09224 | 1 |
| ORGANELLE_MEMBRANE                    | -0,052 | 0,159 | 0,63854 | 1 |
| chr11q12                              | -0,052 | 0,159 | 0,16945 | 1 |
| PARK_OSTEOBLAST_DIFFERENTIATION_BY_PI | -0,052 | 0,159 | 0,40853 | 1 |
| LOPEZ_MESOTHELIOMA_SURVIVAL_OVERALL   | -0,052 | 0,159 | 0,24052 | 1 |
| GCM_MAP4K4                            | -0,052 | 0,159 | 0,14516 | 1 |
| GSE26928_EFF_MEM_VS_CENTR_MEM_CD4_    | -0,052 | 0,16  | 0,00125 | 1 |
| MIZUKAMI_HYPOXIA_UP                   | -0,052 | 0,16  | 0,17567 | 1 |
| CAR_TNFRSF25                          | -0,052 | 0,16  | 0,16259 | 1 |
| GSE3982_MAST_CELL_VS_MAC_DN           | -0,052 | 0,16  | 0,43967 | 1 |
| PETRETTO_BLOOD_PRESSURE_DN            | 0,052  | 0,16  | 0,78501 | 1 |
| REACTOME_MYD88_MAL_CASCADE_INITIATEI  | -0,052 | 0,16  | 0,18221 | 1 |
| TSAI_RESPONSE_TO_RADIATION_THERAPY    | -0,051 | 0,16  | 0,01239 | 1 |
| GARGALOVIC_RESPONSE_TO_OXIDIZED_PHOS  | -0,051 | 0,161 | 0,5017  | 1 |
| WENG_POR_DOSAGE                       | 0,051  | 0,161 | 0,32978 | 1 |
| INSULIN_RECEPTOR_SIGNALING_PATHWAY    | -0,051 | 0,161 | 0,00025 | 1 |
| GSE36476_CTRL_VS_TSST_ACT_16H_MEMO    | -0,051 | 0,161 | 0,01126 | 1 |
| TERAMOTO_OPN_TARGETS_CLUSTER_4        | 0,051  | 0,161 | 0,17035 | 1 |
| ZEMBUTSU_SENSITIVITY_TO_CISPLATIN     | -0,051 | 0,161 | 0,04417 | 1 |

|                                       |        |       |         |   |
|---------------------------------------|--------|-------|---------|---|
| ESC_V6.5_UP_EARLY.V1_UP               | -0,051 | 0,161 | 0,00096 | 1 |
| GSE17721_POLYIC_VS_GARDIQUIMOD_16H_I  | -0,051 | 0,161 | 0,02693 | 1 |
| GSE17721_CPG_VS_GARDIQUIMOD_2H_BMDM   | -0,051 | 0,162 | 0,11782 | 1 |
| REACTOME_SHC_MEDIATED_SIGNALLING      | -0,051 | 0,162 | 0,33555 | 1 |
| REACTOME_FGFR_LIGAND_BINDING_AND_ACT  | -0,051 | 0,162 | 0,00797 | 1 |
| GSE17721_LPS_VS_GARDIQUIMOD_16H_BMC   | -0,051 | 0,162 | 0,03757 | 1 |
| chr8p22                               | -0,051 | 0,162 | 0,04534 | 1 |
| GSE360_LOW_DOSE_B_MALAYI_VS_M_TUBE    | -0,051 | 0,162 | 0,74949 | 1 |
| PID_FCER1PATHWAY                      | -0,051 | 0,162 | 0,02089 | 1 |
| GNF2_CASP4                            | -0,051 | 0,162 | 0,15536 | 1 |
| LEI_HOXC8_TARGETS_UP                  | -0,051 | 0,162 | 0,90775 | 1 |
| GOLDRATH_NAIVE_VS_MEMORY_CD8_TCELL.   | -0,051 | 0,163 | 0,10792 | 1 |
| MODULE_489                            | -0,051 | 0,163 | 0,42712 | 1 |
| MARIADASON_REGULATED_BY_HISTONE_ACE   | -0,051 | 0,163 | 0,00368 | 1 |
| GEORGANTAS_HSC_MARKERS                | -0,051 | 0,163 | 0,01005 | 1 |
| MODULE_343                            | 0,051  | 0,164 | 0,57432 | 1 |
| GNF2_LCAT                             | 0,051  | 0,164 | 0,6126  | 1 |
| GSE27786_NKCELL_VS_ERYTHROBLAST_UP    | -0,051 | 0,164 | 0,05801 | 1 |
| chr6q12                               | -0,051 | 0,164 | 0,37961 | 1 |
| MODULE_540                            | -0,051 | 0,164 | 0,11194 | 1 |
| GSE27786_CD8_TCELL_VS_NKCELL_DN       | -0,051 | 0,165 | 0,08863 | 1 |
| GOERING_BLOOD_HDL_CHOLESTEROL_QTL_C   | -0,051 | 0,165 | 0,08824 | 1 |
| chr3p26                               | -0,051 | 0,166 | 0,00078 | 1 |
| APOPTOTIC_MITOCHONDRIAL_CHANGES       | -0,051 | 0,166 | 0,27976 | 1 |
| SYNAPTOGENESIS                        | -0,051 | 0,166 | 0,42737 | 1 |
| GSE7852_LN_VS_FAT_TCONV_UP            | -0,051 | 0,166 | 0,03182 | 1 |
| BIOCARTA_CTLA4_PATHWAY                | -0,051 | 0,166 | 0,1757  | 1 |
| GSE7852_TREG_VS_TCONV_FAT_UP          | -0,051 | 0,167 | 0,03961 | 1 |
| ATGTAGC,MIR-221,MIR-222               | -0,051 | 0,167 | 0,00535 | 1 |
| BIOCARTA_FIBRINOLYSIS_PATHWAY         | -0,051 | 0,167 | 0,20027 | 1 |
| SHEN_SMARCA2_TARGETS_UP               | 0,051  | 0,167 | 0,26374 | 1 |
| GSE27786_LIN_NEG_VS_CD4_TCELL_DN      | -0,051 | 0,167 | 0,03097 | 1 |
| LOPEZ_MESOTHELIOMA_SURVIVAL_OVERALL.  | -0,051 | 0,167 | 0,00624 | 1 |
| BECKER_TAMOXIFEN_RESISTANCE_UP        | -0,051 | 0,167 | 0,00153 | 1 |
| PID_NCADHERINPATHWAY                  | -0,051 | 0,168 | 0,0819  | 1 |
| OXIDOREDUCTASE_ACTIVITY_ACTING_ON_CH  | -0,051 | 0,168 | 0,09405 | 1 |
| TASTE_RECEPTOR_ACTIVITY               | -0,051 | 0,168 | 0,09471 | 1 |
| GSE26495_NAIVE_VS_PD1LOW_CD8_TCELL.   | -0,051 | 0,168 | 0,13294 | 1 |
| REACTOME_TRIF_MEDIATED_TLR3_SIGNALING | -0,05  | 0,169 | 0,12869 | 1 |
| PROTEIN_AMINO_ACID_ADP_RIBOSYLATION   | -0,05  | 0,169 | 0,94445 | 1 |
| GSE39820_TGFBETA1_VS_TGFBETA3_IN_IL6  | -0,05  | 0,17  | 0,02568 | 1 |
| SPIRA_SMOKERS_LUNG_CANCER_UP          | -0,05  | 0,17  | 0,12649 | 1 |

|                                       |       |       |         |   |
|---------------------------------------|-------|-------|---------|---|
| BIOCARTA_RELA_PATHWAY                 | 0,05  | 0,17  | 0,3503  | 1 |
| GSE17974_0H_VS_0.5H_IN_VITRO_ACT_CD   | -0,05 | 0,17  | 0,01124 | 1 |
| BOYALT_LIVER_CANCER_SUBCLASS_G1_UP    | -0,05 | 0,17  | 0,05853 | 1 |
| COFACTOR_BIOSYNTHETIC_PROCESS         | 0,05  | 0,17  | 0,01513 | 1 |
| SECONDARY_ACTIVE_TRANSMEMBRANE_TRAI   | -0,05 | 0,171 | 0,77135 | 1 |
| BIOCARTA_GLYCOLYSIS_PATHWAY           | -0,05 | 0,171 | 0,61168 | 1 |
| GSE10239_KLRG1INT_VS_KLRG1HIGH_EFF_C  | -0,05 | 0,171 | 0,09883 | 1 |
| GSE8384_CTRL_VS_B_ABORTUS_4H_MAC_C    | -0,05 | 0,171 | 0,24089 | 1 |
| BIOCARTA_CARM1_PATHWAY                | 0,05  | 0,171 | 0,55053 | 1 |
| GOUYER_TATI_TARGETS_DN                | -0,05 | 0,171 | 0,03454 | 1 |
| REACTOME_ELONGATION_ARREST_AND_REC    | -0,05 | 0,171 | 0,71756 | 1 |
| GNF2_HPN                              | 0,05  | 0,171 | 0,65187 | 1 |
| STEROID_DEHYDROGENASE_ACTIVITY_ACTINC | 0,05  | 0,172 | 0,28704 | 1 |
| CAVARD_LIVER_CANCER_MALIGNANT_VS_BE   | -0,05 | 0,172 | 0,31203 | 1 |
| BIOCARTA_AKAPCENTROSOME_PATHWAY       | -0,05 | 0,172 | 0,30362 | 1 |
| PEPTIDE_RECEPTOR_ACTIVITY             | -0,05 | 0,172 | 0,01282 | 1 |
| LEE_AGING_MUSCLE_DN                   | -0,05 | 0,173 | 0,01809 | 1 |
| TSUNODA_CISPLATIN_RESISTANCE_DN       | -0,05 | 0,173 | 0,12038 | 1 |
| MODULE_399                            | -0,05 | 0,173 | 0,25575 | 1 |
| GSE24142_EARLY_THYMIC_PROGENITOR_VS_  | -0,05 | 0,173 | 0,05099 | 1 |
| MODULE_307                            | 0,05  | 0,173 | 0,15405 | 1 |
| SA_B_CELL_RECEPTOR_COMPLEXES          | -0,05 | 0,173 | 0,02765 | 1 |
| PID_GMCSF_PATHWAY                     | -0,05 | 0,173 | 0,23389 | 1 |
| MITOCHONDRIAL_TRANSPORT               | -0,05 | 0,173 | 0,48374 | 1 |
| chr11q24                              | -0,05 | 0,173 | 0,20057 | 1 |
| PID_HNF3APATHWAY                      | 0,05  | 0,174 | 0,10943 | 1 |
| GSE14308_TH17_VS_INDUCED_TREG_UP      | -0,05 | 0,174 | 0,03517 | 1 |
| LEIN_PONS_MARKERS                     | -0,05 | 0,174 | 0,04794 | 1 |
| KIM_ALL_DISORDERS_CALB1_CORR_DN       | -0,05 | 0,174 | 0,06256 | 1 |
| REACTOME_PYRIMIDINE_CATABOLISM        | -0,05 | 0,174 | 0,14751 | 1 |
| GSE17974_IL4_AND_ANTI_IL12_VS_UNTREA  | -0,05 | 0,174 | 0,13384 | 1 |
| REACTOME_REGULATION_OF_COMPLEMENT_C   | 0,05  | 0,174 | 0,41775 | 1 |
| MEISSNER_NPC_HCP_WITH_H3K27ME3        | -0,05 | 0,175 | 0,18544 | 1 |
| REACTOME_ACETYLCHOLINE_NEUROTRANSMI   | 0,05  | 0,175 | 0,82577 | 1 |
| GSE17721_0.5H_VS_4H_CPG_BMDM_DN       | -0,05 | 0,175 | 0,07926 | 1 |
| NITROGEN_COMPOUND_METABOLIC_PROCESS   | -0,05 | 0,175 | 0,06308 | 1 |
| SUH_COEXPRESSED_WITH_ID1_AND_ID2_UP   | 0,05  | 0,176 | 0,34858 | 1 |
| LEE_LIVER_CANCER_MYC_E2F1_DN          | -0,05 | 0,176 | 0,30612 | 1 |
| MORF_MYL3                             | -0,05 | 0,176 | 0,00701 | 1 |
| PID_INTEGRIN5_PATHWAY                 | -0,05 | 0,176 | 0,42956 | 1 |
| chr9q22                               | -0,05 | 0,176 | 0,01968 | 1 |
| GSE7460_WT_VS_FOXP3_HET_ACT_TCONV_    | -0,05 | 0,176 | 0,00013 | 1 |

|                                       |        |       |         |   |
|---------------------------------------|--------|-------|---------|---|
| ELVIDGE_HIF1A_AND_HIF2A_TARGETS_DN    | -0,05  | 0,176 | 0,54515 | 1 |
| SANCHEZ_MDM2_TARGETS                  | 0,05   | 0,177 | 0,49588 | 1 |
| CHEN_LVAD_SUPPORT_OF_FAILING_HEART_I  | -0,05  | 0,177 | 0,09367 | 1 |
| GROSS_HYPOXIA_VIA_ELK3_AND_HIF1A_DN   | -0,05  | 0,177 | 0,20389 | 1 |
| WESTON_VEGFA_TARGETS_6HR              | -0,049 | 0,177 | 0,01014 | 1 |
| VISALA_AGING_LYMPHOCYTE_UP            | -0,049 | 0,177 | 0,202   | 1 |
| GSE6269_FLU_VS_E_COLI_INF_PBMC_UP     | -0,049 | 0,177 | 0,28577 | 1 |
| GSE27786_NEUTROPHIL_VS_MONO_MAC_UP    | -0,049 | 0,178 | 0,00796 | 1 |
| GENTILE_UV_LOW_DOSE_UP                | -0,049 | 0,178 | 0,07924 | 1 |
| MODULE_62                             | 0,049  | 0,178 | 0,14543 | 1 |
| PID_CIRCADIANPATHWAY                  | -0,049 | 0,178 | 0,01817 | 1 |
| THUM_SYSTOLIC_HEART_FAILURE_UP        | -0,049 | 0,178 | 0,102   | 1 |
| GSE360_L_MAJOR_VS_B_MALAYI_LOW_DOS    | -0,049 | 0,178 | 0,11883 | 1 |
| BIOCARTA_TCAPOPTOSIS_PATHWAY          | -0,049 | 0,178 | 0,14019 | 1 |
| FUCOSYLTRANSFERASE_ACTIVITY           | -0,049 | 0,178 | 0,69919 | 1 |
| GSE11924_TFH_VS_TH2_CD4_TCELL_UP      | -0,049 | 0,178 | 0,00027 | 1 |
| MODULE_132                            | 0,049  | 0,178 | 0,16425 | 1 |
| NAKAMURA_ADIPOGENESIS_LATE_UP         | -0,049 | 0,178 | 0,00155 | 1 |
| PROTEIN_C_TERMINUS_BINDING            | -0,049 | 0,178 | 0,00258 | 1 |
| ZHANG_RESPONSE_TO_IKK_INHIBITOR_AND_  | -0,049 | 0,178 | 0,00384 | 1 |
| ZHAN_MULTIPLE_MYELOMA_PR_DN           | -0,049 | 0,178 | 0,0463  | 1 |
| GSE29617_CTRL_VS_TIV_FLU_VACCINE_PBM  | -0,049 | 0,178 | 0,9186  | 1 |
| MITOCHONDRION_ORGANIZATION_AND_BIOGE  | -0,049 | 0,179 | 0,37596 | 1 |
| VACUOLAR_TRANSPORT                    | 0,049  | 0,179 | 0,64773 | 1 |
| GSE31082_DN_VS_CD4_SP_THYMOCYTE_DN    | -0,049 | 0,179 | 0,00868 | 1 |
| TOMLINS_METASTASIS_DN                 | 0,049  | 0,179 | 0,73944 | 1 |
| PID_HIF1_TFPATHWAY                    | -0,049 | 0,18  | 0,17266 | 1 |
| MONOOXYGENASE_ACTIVITY                | -0,049 | 0,18  | 0,08347 | 1 |
| SARTIPY_BLUNTED_BY_INSULIN_RESISTANCE | -0,049 | 0,18  | 0,00026 | 1 |
| MODULE_486                            | -0,049 | 0,18  | 0,0319  | 1 |
| HUMORAL_IMMUNE_RESPONSE               | -0,049 | 0,18  | 0,13049 | 1 |
| MODULE_101                            | 0,049  | 0,18  | 0,18352 | 1 |
| DACOSTA_LOW_DOSE_UV_RESPONSE_VIA_E    | -0,049 | 0,181 | 0,12871 | 1 |
| STARK_PREFRONTAL_CORTEX_22Q11_DELET   | -0,049 | 0,181 | 0,02371 | 1 |
| REACTOME_HORMONE_LIGAND_BINDING_REC1  | -0,049 | 0,181 | 0,03788 | 1 |
| DEURIG_T_CELL_PROLYMPHOCYTIC_LEUKEMIA | -0,049 | 0,181 | 0,10694 | 1 |
| VALK_AML_CLUSTER_3                    | -0,049 | 0,181 | 0,0504  | 1 |
| IMMUNE_EFFECTOR_PROCESS               | -0,049 | 0,181 | 0,10943 | 1 |
| EHLERS_ANEUPLOIDY_UP                  | -0,049 | 0,181 | 0,0036  | 1 |
| CYCLASE_ACTIVITY                      | -0,049 | 0,181 | 0,05594 | 1 |
| PHOSPHORUS_OXYGEN_LYASE_ACTIVITY      | -0,049 | 0,181 | 0,05594 | 1 |
| MYLLYKANGAS_AMPLIFICATION_HOT_SPOT_1  | -0,049 | 0,182 | 0,00616 | 1 |

|                                       |        |       |         |   |
|---------------------------------------|--------|-------|---------|---|
| RYAAAKNNNNNTTGW_UNKNOWN               | -0,049 | 0,182 | 0,01586 | 1 |
| FERRANDO_LYL1_NEIGHBORS               | -0,049 | 0,182 | 0,00482 | 1 |
| NIELSEN_SYNOVIAL_SARCOMA_DN           | 0,049  | 0,182 | 0,55109 | 1 |
| REACTOME_REGULATION_OF_INSULIN_LIKE_G | -0,049 | 0,182 | 0,00095 | 1 |
| SH2_DOMAIN_BINDING                    | -0,049 | 0,182 | 0,06088 | 1 |
| GSE18791_UNSTIM_VS_NEWCATSLE_VIRUS_   | -0,049 | 0,182 | 0,3454  | 1 |
| GSE13485_DAY3_VS_DAY7_YF17D_VACCINI   | -0,049 | 0,183 | 0,42573 | 1 |
| REACTOME_OTHER_SEMAPHORIN_INTERACTIC  | -0,049 | 0,183 | 0,05001 | 1 |
| THUM_SYSTOLIC_HEART_FAILURE_DN        | -0,049 | 0,183 | 0,00737 | 1 |
| WOO_LIVER_CANCER_RECURRENCE_DN        | 0,049  | 0,183 | 0,37924 | 1 |
| LINDSTEDT_DENDRITIC_CELL_MATURATION_I | -0,049 | 0,183 | 0,20233 | 1 |
| GNF2_SPRR1B                           | -0,049 | 0,183 | 0,63158 | 1 |
| REACTOME_IRAK2_MEDIATED_ACTIVATION_C  | -0,049 | 0,183 | 0,29756 | 1 |
| WARTERS_IR_RESPONSE_5GY               | -0,049 | 0,183 | 0,00222 | 1 |
| GSE17974_IL4_AND_ANTI_IL12_VS_UNTREA  | -0,049 | 0,183 | 0,28737 | 1 |
| chr1q42                               | -0,049 | 0,183 | 0,23895 | 1 |
| ESTABLISHMENT_OF_CELLULAR_LOCALIZATIC | -0,049 | 0,183 | 0,11217 | 1 |
| POTTI_ETOPOSIDE_SENSITIVITY           | -0,049 | 0,183 | 0,31463 | 1 |
| TCCAGAG,MIR-518C                      | -0,049 | 0,184 | 0,03798 | 1 |
| GSE13485_DAY7_VS_DAY21_YF17D_VACCII   | -0,049 | 0,184 | 0,37087 | 1 |
| SIGNAL_SEQUENCE_BINDING               | -0,049 | 0,185 | 0,74308 | 1 |
| chr8p11                               | -0,049 | 0,185 | 0,18261 | 1 |
| GGGACCA,MIR-133A,MIR-133B             | -0,049 | 0,185 | 0,04908 | 1 |
| FATTY_ACID_BETA_OXIDATION             | 0,049  | 0,185 | 0,73418 | 1 |
| PID_NFKAPPABCANONICALPATHWAY          | -0,049 | 0,185 | 0,31496 | 1 |
| MIKKELSEN_MEF_LCP_WITH_H3K4ME3        | -0,049 | 0,185 | 0,0248  | 1 |
| KEGG_NITROGEN_METABOLISM              | -0,049 | 0,185 | 0,01707 | 1 |
| GNF2_ATM                              | -0,049 | 0,185 | 0,02907 | 1 |
| SENGUPTA_NASOPHARYNGEAL_CARCINOMA_    | -0,049 | 0,186 | 0,00176 | 1 |
| ZHAN_MULTIPLE_MYELOMA_LB_DN           | -0,049 | 0,186 | 0,25154 | 1 |
| GSE22886_NAIVE_BCELL_VS_BM_PLASMA_C   | -0,049 | 0,186 | 0,27417 | 1 |
| TACAATC,MIR-508                       | -0,049 | 0,186 | 0,01586 | 1 |
| GSE360_L_DONOVANI_VS_B_MALAYI_HIGH_   | -0,048 | 0,186 | 0,05134 | 1 |
| GSE17721_CTRL_VS_POLYIC_0.5H_BMDM_D   | -0,048 | 0,186 | 0,0046  | 1 |
| MODULE_514                            | -0,048 | 0,187 | 0,0021  | 1 |
| WANG_TARGETS_OF_MLL_CBP_FUSION_UP     | -0,048 | 0,187 | 0,22284 | 1 |
| VALK_AML_CLUSTER_4                    | -0,048 | 0,187 | 0,01344 | 1 |
| PROTEIN_IMPORT_INTO_NUCLEUS_TRANSLOC  | -0,048 | 0,187 | 0,06887 | 1 |
| BIOCARTA_INSULIN_PATHWAY              | -0,048 | 0,188 | 0,01396 | 1 |
| GSE22886_IGA_VS_IGM_MEMORY_BCELL_DN   | -0,048 | 0,188 | 0,01866 | 1 |
| GSE17974_1.5H_VS_72H_IL4_AND_ANTI_IL  | -0,048 | 0,188 | 0,03869 | 1 |
| GSE18791_CTRL_VS_NEWCASTLE_VIRUS_DC   | -0,048 | 0,188 | 0,42181 | 1 |



|                                      |        |       |         |   |
|--------------------------------------|--------|-------|---------|---|
| OXIDOREDUCTASE_ACTIVITY_GO_0016616   | -0,048 | 0,188 | 0,10326 | 1 |
| CLIMENT_BREAST_CANCER_COPY_NUMBER_D  | -0,048 | 0,188 | 0,02964 | 1 |
| KIM_RESPONSE_TO_TSA_AND_DECITABINE_C | -0,048 | 0,188 | 0,46368 | 1 |
| ORGANIC_ANION_TRANSMEMBRANE_TRANSPC  | -0,048 | 0,189 | 0,27027 | 1 |
| REACTOME_PHASE1_FUNCTIONALIZATION_OF | -0,048 | 0,189 | 0,00289 | 1 |
| MODULE_45                            | -0,048 | 0,189 | 0,156   | 1 |
| SCHAEFFER_PROSTATE_DEVELOPMENT_AND_  | -0,048 | 0,189 | 0,00397 | 1 |
| BIOCARTA_THELPER_PATHWAY             | -0,048 | 0,189 | 0,14612 | 1 |
| MATZUK_IMPLANTATION_AND_UTERINE      | -0,048 | 0,19  | 0,13764 | 1 |
| UEDA_CENTRAL_CLOCK                   | -0,048 | 0,19  | 0,07607 | 1 |
| WORSCHER_TUMOR_EVASION_AND_TOLERC    | -0,048 | 0,19  | 0,50389 | 1 |
| AAGWWRNYGGC_UNKNOWN                  | -0,048 | 0,19  | 0,06319 | 1 |
| DACOSTA_UV_RESPONSE_VIA_ERCC3_XPCS_  | -0,048 | 0,19  | 0,40953 | 1 |
| TURASHVILI_BREAST_NORMAL_DUCTAL_VS_  | -0,048 | 0,19  | 0,16233 | 1 |
| FOSTER_TOLERANT_MACROPHAGE_UP        | -0,048 | 0,19  | 0,35561 | 1 |
| PENG_GLUCOSE_DEPRIVATION_UP          | -0,048 | 0,191 | 0,17208 | 1 |
| TURASHVILI_BREAST_DUCTAL_CARCINOMA_  | -0,048 | 0,191 | 0,04323 | 1 |
| GSE17721_LPS_VS_GARDIQUIMOD_24H_BMC  | -0,048 | 0,191 | 0,00746 | 1 |
| GSE17721_PAM3CSK4_VS_CPG_8H_BMDM_I   | -0,048 | 0,191 | 0,0864  | 1 |
| MEISSNER_NPC_ICP_WITH_H3_UNMETHYLATE | -0,048 | 0,191 | 0,00388 | 1 |
| chr14q                               | -0,048 | 0,191 | 0,00449 | 1 |
| AGARWAL_AKT_PATHWAY_TARGETS          | -0,048 | 0,191 | 0,79792 | 1 |
| INSOLUBLE_FRACTION                   | -0,048 | 0,191 | 0,09225 | 1 |
| MYLLYKANGAS_AMPLIFICATION_HOT_SPOT_1 | 0,048  | 0,191 | 0,73687 | 1 |
| KEGG_INTESTINAL_IMMUNE_NETWORK_FOR_I | -0,048 | 0,192 | 0,18073 | 1 |
| EXTRINSIC_TO_PLASMA_MEMBRANE         | 0,048  | 0,192 | 0,45861 | 1 |
| GTATGAT,MIR-154,MIR-487              | -0,048 | 0,192 | 0,01026 | 1 |
| HAHTOLA_CTCL_CUTANEOUS               | -0,048 | 0,192 | 0,11171 | 1 |
| DUNNE_TARGETS_OF_AML1_MTG8_FUSION_I  | -0,048 | 0,192 | 0,11861 | 1 |
| HOFFMANN_IMMATURE_TO_MATURE_B_LYMP   | -0,048 | 0,192 | 0,07015 | 1 |
| HUMMERICH_MALIGNANT_SKIN_TUMOR_UP    | -0,048 | 0,192 | 0,64327 | 1 |
| BAFNA_MUC4_TARGETS_UP                | -0,048 | 0,193 | 0,72737 | 1 |
| MODULE_412                           | -0,048 | 0,193 | 0,11071 | 1 |
| HOEBEKE_LYMPHOID_STEM_CELL_UP        | -0,048 | 0,193 | 0,02344 | 1 |
| MYLLYKANGAS_AMPLIFICATION_HOT_SPOT_1 | 0,048  | 0,193 | 0,77926 | 1 |
| GSE24142_DN2_VS_DN3_THYMOCYTE_FETA   | -0,048 | 0,193 | 0,00985 | 1 |
| HOLLEMAN_DAUNORUBICIN_ALL_DN         | -0,048 | 0,194 | 0,02989 | 1 |
| KYNG_ENVIRONMENTAL_STRESS_RESPONSE_  | -0,048 | 0,194 | 0,00022 | 1 |
| ST_IL_13_PATHWAY                     | -0,048 | 0,194 | 0,15292 | 1 |
| ST_INTERLEUKIN_13_PATHWAY            | -0,048 | 0,194 | 0,15292 | 1 |
| GSE2706_2H_VS_8H_LPS_STIM_DC_DN      | -0,048 | 0,194 | 0,27169 | 1 |
| GARGALOVIC_RESPONSE_TO_OXIDIZED_PHOS | -0,048 | 0,195 | 0,62982 | 1 |

|                                       |        |       |         |   |
|---------------------------------------|--------|-------|---------|---|
| MEDINA_SMARCA4_TARGETS                | -0,048 | 0,195 | 0,04143 | 1 |
| GSE13484_UNSTIM_VS_YF17D_VACCINE_STI  | -0,048 | 0,195 | 0,14806 | 1 |
| GSE39820_CTRL_VS_IL1B_IL6_IL23A_CD4_  | -0,048 | 0,195 | 0,02499 | 1 |
| MODULE_22                             | 0,047  | 0,195 | 0,23519 | 1 |
| BANDRES_RESPONSE_TO_CARMUSTIN_WITHO   | 0,047  | 0,195 | 0,24947 | 1 |
| BIOCARTA_NO1_PATHWAY                  | -0,047 | 0,196 | 0,20666 | 1 |
| FU_INTERACT_WITH_ALKBH8               | -0,047 | 0,196 | 0,41943 | 1 |
| ACTIVATION_OF_IMMUNE_RESPONSE         | -0,047 | 0,196 | 0,16771 | 1 |
| GCM_TPR                               | -0,047 | 0,196 | 0,74016 | 1 |
| chr3q29                               | -0,047 | 0,197 | 0,60996 | 1 |
| GSE29617_DAY3_VS_DAY7_TIV_FLU_VACCI   | -0,047 | 0,197 | 0,15296 | 1 |
| BANDRES_RESPONSE_TO_CARMUSTIN_MGMT_   | -0,047 | 0,197 | 0,89546 | 1 |
| GSE17721_0.5H_VS_24H_POLYIC_BMDM_DN   | -0,047 | 0,197 | 0,18923 | 1 |
| INTERLEUKIN_8_BIOSYNTHETIC_PROCESS    | 0,047  | 0,197 | 0,36393 | 1 |
| KIM_MYC_AMPLIFICATION_TARGETS_DN      | -0,047 | 0,197 | 0,02835 | 1 |
| GCM_GSTA4                             | -0,047 | 0,197 | 0,00819 | 1 |
| RESPONSE_TO_DRUG                      | 0,047  | 0,197 | 0,20654 | 1 |
| chr15q15                              | -0,047 | 0,198 | 0,14962 | 1 |
| REACTOME_RIP_MEDIATED_NFKB_ACTIVATIOI | -0,047 | 0,198 | 0,13793 | 1 |
| HEMATOPOIETIN_INTERFERON_CLASSD200_D  | -0,047 | 0,198 | 0,14011 | 1 |
| KEGG_AMINO_SUGAR_AND_NUCLEOTIDE_SUC   | 0,047  | 0,198 | 0,02297 | 1 |
| WONG_MITOCHONDRIA_GENE_MODULE         | 0,047  | 0,198 | 0,16954 | 1 |
| MODULE_24                             | -0,047 | 0,199 | 0,0258  | 1 |
| MULTI_ORGANISM_PROCESS                | -0,047 | 0,199 | 0,22703 | 1 |
| REACTOME_TRAF6_MEDIATED_NFKB_ACTIVA   | -0,047 | 0,199 | 0,21709 | 1 |
| GSE25087_FETAL_VS_ADULT_TREG_DN       | -0,047 | 0,199 | 0,00328 | 1 |
| CREIGHTON_AKT1_SIGNALING_VIA_MTOR_UP  | 0,047  | 0,199 | 0,3226  | 1 |
| OXIDOREDUCTASE_ACTIVITY_GO_0016705    | -0,047 | 0,2   | 0,434   | 1 |
| chr6p21                               | -0,047 | 0,2   | 0,24849 | 1 |
| BOQUEST_STEM_CELL_CULTURED_VS_FRESH   | -0,047 | 0,2   | 0,0004  | 1 |
| chr21p11                              | 0,047  | 0,2   | 0,10297 | 1 |
| GCM_PTK2                              | -0,047 | 0,2   | 0,21792 | 1 |
| NLS_BEARING_SUBSTRATE_IMPORT_INTO_NU  | -0,047 | 0,2   | 0,65096 | 1 |
| SMALL_GTPASE_REGULATOR_ACTIVITY       | -0,047 | 0,2   | 0,06723 | 1 |
| FLECHNER_BIOPSY_KIDNEY_TRANSPLANT_OK  | -0,047 | 0,2   | 0,51743 | 1 |
| FRASOR_RESPONSE_TO ESTRADIOL_DN       | 0,047  | 0,2   | 0,93806 | 1 |
| GALLUZZI_PREVENT_MITOCHONDIAL_PERMEA  | 0,047  | 0,2   | 0,77346 | 1 |
| BIOCARTA_BAD_PATHWAY                  | -0,047 | 0,2   | 0,00069 | 1 |
| ALONSO_METASTASIS_EMT_DN              | -0,047 | 0,2   | 0,40875 | 1 |
| ROZANOV_MMP14_TARGETS_DN              | -0,047 | 0,2   | 0,36592 | 1 |
| MODULE_148                            | -0,047 | 0,201 | 0,0425  | 1 |
| REACTOME_CROSS_PRESENTATION_OF_SOLU   | -0,047 | 0,201 | 0,67451 | 1 |

|                                              |        |       |         |   |
|----------------------------------------------|--------|-------|---------|---|
| MORF_SP3                                     | -0,047 | 0,201 | 0,83254 | 1 |
| GSE14308_TH2_VS_TH1_UP                       | -0,047 | 0,201 | 0,33961 | 1 |
| SESTO_RESPONSE_TO_UV_C2                      | -0,047 | 0,201 | 0,68494 | 1 |
| REACTOME_CYTOKINE_SIGNALING_IN_IMMUNE        | -0,047 | 0,202 | 0,31651 | 1 |
| REACTOME_SULFUR_AMINO_ACID_METABOLISM        | -0,047 | 0,202 | 0,07376 | 1 |
| MCCOLLUM_GELDANAMYCIN_RESISTANCE_DN          | -0,047 | 0,202 | 0,22682 | 1 |
| REACTOME_HYALURONAN_METABOLISM               | -0,047 | 0,202 | 0,1324  | 1 |
| GSE17721_0.5H_VS_8H_LPS_BMDM_DN              | -0,047 | 0,202 | 0,04706 | 1 |
| DEAMINASE_ACTIVITY                           | -0,047 | 0,203 | 0,09609 | 1 |
| BOQUEST_STEM_CELL_DN                         | -0,047 | 0,203 | 0,01098 | 1 |
| PROTEIN_MODIFICATION_BY_SMALL_PROTEIN        | -0,047 | 0,203 | 0,34396 | 1 |
| REACTOME_VIF_MEDIATED_DEGRADATION_OF         | -0,047 | 0,204 | 0,73937 | 1 |
| VANDESLUIS_NORMAL_EMBRYOS_DN                 | -0,047 | 0,204 | 0,01991 | 1 |
| REACTOME_REGULATION_OF_WATER_BALANCE         | -0,047 | 0,204 | 0,00427 | 1 |
| GNF2_CCNA1                                   | -0,047 | 0,204 | 0,17531 | 1 |
| GSE22886_CD8_VS_CD4_NAIVE_TCELL_UP           | -0,047 | 0,204 | 0,15962 | 1 |
| ROSS_AML_WITH_CBFB_MYH11_FUSION              | -0,047 | 0,204 | 0,20139 | 1 |
| ISOMERASE_ACTIVITY                           | -0,047 | 0,204 | 0,91098 | 1 |
| CDC42_PROTEIN_SIGNAL_TRANSDUCTION            | -0,047 | 0,205 | 0,05018 | 1 |
| REACTOME_INTRINSIC_PATHWAY                   | -0,046 | 0,205 | 0,02465 | 1 |
| AMINOPEPTIDASE_ACTIVITY                      | -0,046 | 0,205 | 0,04208 | 1 |
| GCM_DEAF1                                    | 0,046  | 0,205 | 0,46753 | 1 |
| ZAIDI_OSTEOBLAST_TRANSCRIPTION_FACTOR        | -0,046 | 0,205 | 0,03334 | 1 |
| BORCZUK_MALIGNANT_MESOTHELIOMA_DN            | -0,046 | 0,206 | 0,00377 | 1 |
| BIOCARTA_TPO_PATHWAY                         | -0,046 | 0,206 | 0,03798 | 1 |
| GTAAACC,MIR-299-5P                           | -0,046 | 0,206 | 0,04461 | 1 |
| YAO_TEMPORAL_RESPONSE_TO_PROGESTERONE        | -0,046 | 0,206 | 0,00713 | 1 |
| GCM_NUMA1                                    | -0,046 | 0,207 | 0,03154 | 1 |
| REACTOME_FGFR1_LIGAND_BINDING_AND_ACTIVATION | -0,046 | 0,207 | 0,14316 | 1 |
| chr12q12                                     | -0,046 | 0,207 | 0,21269 | 1 |
| GSE17721_CTRL_VS_LPS_0.5H_BMDM_DN            | -0,046 | 0,208 | 0,00639 | 1 |
| MORF_BECN1                                   | -0,046 | 0,208 | 0,1479  | 1 |
| GSE13493_DP_VS_CD4INTCD8POS_THYMOCYTES       | -0,046 | 0,208 | 0,00886 | 1 |
| GSE9006_HEALTHY_VS_TYPE_1_DIABETES_IMMUNE    | -0,046 | 0,208 | 0,46934 | 1 |
| GSE24634_IL4_VS_CTRL_TREATED_NAIVE_CD8POS    | -0,046 | 0,208 | 0,17825 | 1 |
| GSE339_EX_VIVO_VS_IN_CULTURE_CD8POS          | -0,046 | 0,208 | 0,031   | 1 |
| GSE3982_MAST_CELL_VS EFF_MEMORY_CD8POS       | -0,046 | 0,209 | 0,60016 | 1 |
| POSITIVE_REGULATION_OF_ANGIOGENESIS          | -0,046 | 0,209 | 0,12431 | 1 |
| DUTERTRE ESTRADIOL_RESPONSE_24HR_DN          | -0,046 | 0,209 | 0,10065 | 1 |
| ACGCACA,MIR-210                              | 0,046  | 0,209 | 0,62558 | 1 |
| REACTOME_ER_PHAGOSOME_PATHWAY                | -0,046 | 0,209 | 0,71976 | 1 |
| SMIRNOV_CIRCULATING_ENDOTHELIOCYTES_I        | -0,046 | 0,209 | 0,33224 | 1 |

|                                       |        |       |         |   |
|---------------------------------------|--------|-------|---------|---|
| KEGG_AMYOTROPHIC_LATERAL_SCLEROSIS_A  | -0,046 | 0,209 | 0,02854 | 1 |
| KANG_CISPLATIN_RESISTANCE_DN          | 0,046  | 0,209 | 0,41026 | 1 |
| NEURON_APOPTOSIS                      | -0,046 | 0,209 | 0,02186 | 1 |
| SMIRNOV_RESPONSE_TO_IR_6HR_UP         | -0,046 | 0,21  | 0,0092  | 1 |
| KINASE_BINDING                        | -0,046 | 0,21  | 0,11992 | 1 |
| REACTOME_SYNTHESIS_OF_PIPS_AT_THE_EA  | 0,046  | 0,21  | 0,28751 | 1 |
| MODULE_174                            | -0,046 | 0,21  | 0,33591 | 1 |
| LANDIS_ERBB2_BREAST_TUMORS_324_DN     | -0,046 | 0,21  | 0,01073 | 1 |
| YANG_MUC2_TARGETS_COLON_3MO_DN        | 0,046  | 0,21  | 0,39417 | 1 |
| ALTEMEIER_RESPONSE_TO_LPS_WITH_MECH/  | -0,046 | 0,211 | 0,34541 | 1 |
| GSE17974_OH_VS_48H_IN_VITRO_ACT_CD4   | -0,046 | 0,211 | 0,00771 | 1 |
| YAO_TEMPORAL_RESPONSE_TO_PROGESTERC   | -0,046 | 0,211 | 0,00117 | 1 |
| GSE7852_TREG_VS_TCONV_UP              | -0,046 | 0,211 | 0,14332 | 1 |
| KEGG_STEROID_BIOSYNTHESIS             | -0,046 | 0,211 | 0,8848  | 1 |
| REACTOME_SYNTHESIS_SECRETION_AND_INA  | -0,046 | 0,212 | 0,39711 | 1 |
| V\$RFX1_01                            | -0,046 | 0,212 | 0,00037 | 1 |
| KEGG_PROTEASOME                       | -0,046 | 0,212 | 0,63415 | 1 |
| OZEN_MIR125B1_TARGETS                 | -0,046 | 0,212 | 0,67421 | 1 |
| KEGG_GLYCEROLIPID_METABOLISM          | -0,046 | 0,213 | 0,16999 | 1 |
| HOOI_ST7_TARGETS_DN                   | -0,046 | 0,213 | 0,06009 | 1 |
| BOYALT_LIVER_CANCER_SUBCLASS_G23_D    | -0,046 | 0,213 | 0,00021 | 1 |
| ALCALAY_AML_BY_NPM1_LOCALIZATION_UP   | -0,046 | 0,214 | 0,03044 | 1 |
| REACTOME_ACTIVATED_POINT_MUTANTS_OF   | -0,046 | 0,214 | 0,05312 | 1 |
| ESTABLISHMENT_OF_PROTEIN_LOCALIZATION | -0,046 | 0,214 | 0,16236 | 1 |
| GSE15930_STIM_VS_STIM_AND_IFNAB_72H_  | -0,046 | 0,214 | 0,56735 | 1 |
| GSE12366_GC_VS_MEMORY_BCELL_DN        | -0,046 | 0,214 | 0,02064 | 1 |
| MODULE_272                            | -0,046 | 0,214 | 0,33079 | 1 |
| GSE3982_NKCELL_VS_TH1_UP              | -0,046 | 0,214 | 0,00908 | 1 |
| GLUTATHIONE_TRANSFERASE_ACTIVITY      | 0,046  | 0,215 | 0,60849 | 1 |
| KORKOLA_CHORIOCARCINOMA_UP            | -0,046 | 0,215 | 0,72153 | 1 |
| GSE18791_UNSTIM_VS_NEWCATSLE_VIRUS_   | -0,046 | 0,215 | 0,12403 | 1 |
| GSE39820_TGFBETA1_VS_TGFBETA3_IN_IL6  | -0,046 | 0,215 | 0,21187 | 1 |
| GSE14308_TH2_VS_NAIVE_CD4_TCELL_DN    | -0,045 | 0,215 | 0,01291 | 1 |
| REACTOME_CREB_PHOSPHORYLATION_THROL   | -0,045 | 0,215 | 0,07013 | 1 |
| OHM_METHYLATED_IN_ADULT_CANCERS       | -0,045 | 0,215 | 0,01596 | 1 |
| REACTOME_PROSTANOID_LIGAND_RECEPTOR:  | -0,045 | 0,215 | 0,01304 | 1 |
| KAAB_FAILED_HEART_VENTRICLE_DN        | -0,045 | 0,215 | 0,39777 | 1 |
| WEBER_METHYLATED_ICP_IN_FIBROBLAST    | -0,045 | 0,216 | 0,49133 | 1 |
| BIOCARTA_ACH_PATHWAY                  | -0,045 | 0,216 | 0,56059 | 1 |
| CARBOXYLIC_ACID_TRANSMEMBRANE_TRANS   | -0,045 | 0,216 | 0,16327 | 1 |
| GSE3982_MAC_VS_NKCELL_UP              | -0,045 | 0,216 | 0,41816 | 1 |
| GSE9037_CTRL_VS_LPS_1H_STIM_IRAK4_KC  | -0,045 | 0,216 | 0,20626 | 1 |

|                                       |        |       |         |   |
|---------------------------------------|--------|-------|---------|---|
| REACTOME_COSTIMULATION_BY_THE_CD28_   | -0,045 | 0,216 | 0,22926 | 1 |
| SHI_SPARC_TARGETS_UP                  | -0,045 | 0,216 | 0,01667 | 1 |
| GSE14308_INDUCED_VS_NATURAL_TREG_DN   | -0,045 | 0,216 | 0,05839 | 1 |
| KEGG_LIMONENE_AND_PINENE_DEGRADATION  | 0,045  | 0,217 | 0,17614 | 1 |
| FAELT_B_CLL_WITH_VH_REARRANGEMENTS_   | -0,045 | 0,217 | 0,07473 | 1 |
| chr7p                                 | -0,045 | 0,217 | 0,30726 | 1 |
| CYTOPLASM_ORGANIZATION_AND_BIOGENESI  | -0,045 | 0,218 | 0,07517 | 1 |
| MODULE_305                            | -0,045 | 0,218 | 0,3426  | 1 |
| GCTGAGT,MIR-512-5P                    | -0,045 | 0,219 | 0,02874 | 1 |
| SA_CASPASE_CASCADE                    | -0,045 | 0,219 | 0,3556  | 1 |
| TURASHVILI_BREAST_CARCINOMA_DUCTAL_   | -0,045 | 0,219 | 0,12762 | 1 |
| GSE22886_CTRL_VS_LPS_24H_DC_DN        | -0,045 | 0,219 | 0,40356 | 1 |
| MEISSNER_NPC_ICP_WITH_H3K4ME3         | -0,045 | 0,219 | 0,03508 | 1 |
| GSE15930_STIM_VS_STIM_AND_IFNAB_48H_  | -0,045 | 0,22  | 0,2753  | 1 |
| LEE_NAIVE_T_LYMPHOCYTE                | -0,045 | 0,22  | 0,03358 | 1 |
| chr10q22                              | -0,045 | 0,22  | 0,06128 | 1 |
| CAMPS_COLON_CANCER_COPY_NUMBER_DN     | -0,045 | 0,22  | 0,07697 | 1 |
| MICROTUBULE_POLYMERIZATION_OR_DEPOLY  | -0,045 | 0,22  | 0,00406 | 1 |
| CHEOK_RESPONSE_TO_MERCAPTOPURINE_UP   | -0,045 | 0,22  | 0,19232 | 1 |
| LI_DCP2_BOUND_MRNA                    | -0,045 | 0,22  | 0,49082 | 1 |
| REACTOME_DOUBLE_STRAND_BREAK_REPAIR   | -0,045 | 0,221 | 0,70214 | 1 |
| GSE3982_MAST_CELL_VS_DC_DN            | -0,045 | 0,221 | 0,14131 | 1 |
| BIOCARTA_MTA3_PATHWAY                 | -0,045 | 0,221 | 0,0068  | 1 |
| REACTOME_NFKB_AND_MAP_KINASES_ACTIV   | -0,045 | 0,221 | 0,25635 | 1 |
| MENSE_HYPOXIA_UP                      | -0,045 | 0,222 | 0,42961 | 1 |
| MODULE_277                            | -0,045 | 0,222 | 0,6851  | 1 |
| CAIRO_HEPATOBLASTOMA_CLASSES_DN       | -0,045 | 0,222 | 0,00165 | 1 |
| UBIQUITIN_CYCLE                       | -0,045 | 0,222 | 0,44737 | 1 |
| CCAATNSNNGCG_UNKNOWN                  | -0,045 | 0,222 | 0,85363 | 1 |
| REACTOME_ACTIVATION_OF_NF_KAPPAB_IN_  | -0,045 | 0,223 | 0,79034 | 1 |
| REACTOME_INTEGRIN_ALPHAIIB_BETA3_SIGN | -0,045 | 0,223 | 0,10467 | 1 |
| NIELSEN_GIST_VS_SYNOVIAL_SARCOMA_UP   | -0,045 | 0,223 | 0,31286 | 1 |
| V\$HNF1_C                             | -0,045 | 0,223 | 0,00645 | 1 |
| NEUTRAL_AMINO_ACID_TRANSPORT          | 0,045  | 0,224 | 0,30401 | 1 |
| MODULE_291                            | -0,045 | 0,224 | 0,53947 | 1 |
| REACTOME_SEMA3A_PLEXIN_REPULSION_SIGI | -0,045 | 0,224 | 0,04159 | 1 |
| WEBER_METHYLATED_HCP_IN_FIBROBLAST_I  | -0,045 | 0,224 | 0,11537 | 1 |
| SETLUR_PROSTATE_CANCER_TMPRSS2_ERG_   | -0,045 | 0,224 | 0,00815 | 1 |
| FINETTI_BREAST_CANCERS_KINOME_GRAY    | 0,045  | 0,224 | 0,47538 | 1 |
| REACTOME_TCR_SIGNALING                | -0,045 | 0,225 | 0,15626 | 1 |
| AMIT_EGF_RESPONSE_20_HELA             | -0,045 | 0,225 | 0,00227 | 1 |
| MODULE_249                            | 0,044  | 0,226 | 0,69114 | 1 |

|                                      |        |       |         |   |
|--------------------------------------|--------|-------|---------|---|
| VANLOO_SP3_TARGETS_UP                | 0,044  | 0,226 | 0,13082 | 1 |
| CHASSOT_SKIN_WOUND                   | -0,044 | 0,226 | 0,00228 | 1 |
| MODULE_234                           | -0,044 | 0,226 | 0,06167 | 1 |
| PROTEIN_UBIQUITINATION               | -0,044 | 0,226 | 0,33254 | 1 |
| TING_SILENCED_BY_DICER               | -0,044 | 0,227 | 0,00779 | 1 |
| GSE29618_LAIV_VS_TIV_FLU_VACCINE_DAY | -0,044 | 0,227 | 0,24766 | 1 |
| MCBRYAN_PUBERTAL_BREAST_4_5WK_DN     | -0,044 | 0,227 | 0,02079 | 1 |
| MORF_BAG5                            | -0,044 | 0,227 | 0,89993 | 1 |
| NAKAMURA_CANCER_MICROENVIRONMENT_UI  | -0,044 | 0,228 | 0,00567 | 1 |
| BIOCARTA_CCR5_PATHWAY                | -0,044 | 0,228 | 0,17091 | 1 |
| BIOCARTA_CELL2CELL_PATHWAY           | -0,044 | 0,228 | 0,70731 | 1 |
| SU_PLACENTA                          | -0,044 | 0,228 | 0,41538 | 1 |
| RESPONSE_TO_CHEMICAL_STIMULUS        | -0,044 | 0,228 | 0,10682 | 1 |
| chr2q12                              | -0,044 | 0,229 | 0,71576 | 1 |
| NIKOLSKY_BREAST_CANCER_12Q13_Q21_AI  | -0,044 | 0,229 | 0,21145 | 1 |
| GSE7460_CTRL_VS_TGFB_TREATED_ACT_FC  | -0,044 | 0,229 | 0,00539 | 1 |
| GSE3982_EFF_MEMORY_CD4_TCELL_VS_TH2  | -0,044 | 0,229 | 0,02657 | 1 |
| PEPTIDE_BINDING                      | -0,044 | 0,229 | 0,04744 | 1 |
| SCIBETTA_KDM5B_TARGETS_UP            | 0,044  | 0,229 | 0,2921  | 1 |
| GNF2_GSTM1                           | 0,044  | 0,229 | 0,40882 | 1 |
| WILLERT_WNT_SIGNALING                | -0,044 | 0,229 | 0,00523 | 1 |
| BIOCARTA_BARR_MAPK_PATHWAY           | -0,044 | 0,229 | 0,07308 | 1 |
| GSE36476_CTRL_VS_TSST_ACT_72H_MEMO   | -0,044 | 0,23  | 0,00518 | 1 |
| LENAOUR_DENDRITIC_CELL_MATURATION_UP | -0,044 | 0,23  | 0,2387  | 1 |
| KESHELAVA_MULTIPLE_DRUG_RESISTANCE   | -0,044 | 0,23  | 0,04615 | 1 |
| SHIPP_DLBCL_CURED_VS_FATAL_DN        | -0,044 | 0,23  | 0,48819 | 1 |
| PROTEIN_KINASE_BINDING               | -0,044 | 0,23  | 0,30012 | 1 |
| KEGG_PORPHYRIN_AND_CHLOROPHYLL_META  | 0,044  | 0,231 | 0,05471 | 1 |
| BIOCARTA_CYTOKINE_PATHWAY            | -0,044 | 0,231 | 0,57578 | 1 |
| GSE3982_BASOPHIL_VS_TH1_UP           | -0,044 | 0,231 | 0,02534 | 1 |
| XU_RESPONSE_TO_TRETINOIN_UP          | -0,044 | 0,232 | 0,37728 | 1 |
| KEGG_RENIN_ANGIOTENSIN_SYSTEM        | -0,044 | 0,232 | 0,01294 | 1 |
| SHEDDEN_LUNG_CANCER_GOOD_SURVIVAL_   | -0,044 | 0,232 | 0,00393 | 1 |
| GNF2_RAP1B                           | -0,044 | 0,232 | 0,44088 | 1 |
| REACTOME_SIGNALING_BY_FGFR3_MUTANTS  | -0,044 | 0,233 | 0,0317  | 1 |
| MORF_AP2M1                           | -0,044 | 0,233 | 0,93999 | 1 |
| MODULE_77                            | 0,044  | 0,233 | 0,2643  | 1 |
| GSE17721_LPS_VS_CPG_8H_BMDM_DN       | -0,044 | 0,234 | 0,76515 | 1 |
| GSE17721_CTRL_VS_CPG_1H_BMDM_UP      | -0,044 | 0,234 | 0,003   | 1 |
| APICAL_PLASMA_MEMBRANE               | -0,044 | 0,234 | 0,74714 | 1 |
| GSE37416_0H_VS_48H_F_TULARENSIS_LVS  | -0,044 | 0,235 | 0,53522 | 1 |
| REACTOME_REGULATION_OF_APOPTOSIS     | -0,044 | 0,235 | 0,62369 | 1 |

|                                        |        |       |         |   |
|----------------------------------------|--------|-------|---------|---|
| LIPID_TRANSPORT                        | -0,044 | 0,235 | 0,037   | 1 |
| MORF_XPC                               | -0,044 | 0,235 | 0,74552 | 1 |
| KEGG_GLYCOSPHINGOLIPID_BIOSYNTHESIS_GL | -0,043 | 0,236 | 0,27348 | 1 |
| KONDO_COLON_CANCER_HCP_WITH_H3K27M     | -0,043 | 0,236 | 0,777   | 1 |
| REACTOME_PRE_NOTCH_PROCESSING_IN_GOI   | -0,043 | 0,236 | 0,05926 | 1 |
| SYNAPTIC_VESICLE                       | -0,043 | 0,237 | 0,12153 | 1 |
| GSE17721_0.5H_VS_24H_GARDIQUIMOD_BM    | -0,043 | 0,237 | 0,27713 | 1 |
| chr10p15                               | -0,043 | 0,237 | 0,5985  | 1 |
| KORKOLA_CHORIOCARCINOMA                | -0,043 | 0,237 | 0,01947 | 1 |
| GSE39820_TGFBETA1_VS_TGFBETA3_IN_IL6   | -0,043 | 0,237 | 0,08673 | 1 |
| RICKMAN_HEAD_AND_NECK_CANCER_E         | -0,043 | 0,237 | 0,67026 | 1 |
| GNF2_SNRK                              | -0,043 | 0,238 | 0,16982 | 1 |
| BRCHAT_RESPONSE_TO_METHOTREXATE_DI     | -0,043 | 0,238 | 0,53668 | 1 |
| REACTOME_BASIGIN_INTERACTIONS          | -0,043 | 0,238 | 0,65526 | 1 |
| GSE17721_POLYIC_VS_PAM3CSK4_8H_BMDM    | -0,043 | 0,238 | 0,06619 | 1 |
| ACAACTT,MIR-382                        | -0,043 | 0,238 | 0,04044 | 1 |
| REACTOME_GLUCAGON_SIGNALING_IN_METAI   | -0,043 | 0,239 | 0,00361 | 1 |
| PID_TRAIL_PATHWAY                      | 0,043  | 0,239 | 0,29447 | 1 |
| chr3p25                                | -0,043 | 0,239 | 0,21178 | 1 |
| POMEROY_MEDULLOBLASTOMA_DESMOPLASIA    | -0,043 | 0,239 | 0,063   | 1 |
| GSE37416_0H_VS_48H_F_TULARENSIS_LVS    | -0,043 | 0,24  | 0,11435 | 1 |
| GSE7764_IL15_NK_CELL_24H_VS_SPLENOC    | -0,043 | 0,24  | 0,04794 | 1 |
| GERHOLD_RESPONSE_TO_TZD_DN             | -0,043 | 0,24  | 0,01548 | 1 |
| LEE_AGING_CEREBELLUM_UP                | -0,043 | 0,24  | 0,13481 | 1 |
| KEGG_VALINE_LEUCINE_AND_ISOLEUCINE_BI  | 0,043  | 0,24  | 0,08606 | 1 |
| GSE10094_LCMV_VS_LISTERIA_IND_EFF_CD   | 0,043  | 0,241 | 0,99912 | 1 |
| LAU_APOPTOSIS_CDKN2A_DN                | -0,043 | 0,241 | 0,11042 | 1 |
| GSE27786_CD8_TCELL_VS_NKTCELL_DN       | -0,043 | 0,241 | 0,12033 | 1 |
| ZEILSTRA_CD44_TARGETS_UP               | -0,043 | 0,241 | 0,12193 | 1 |
| GUENTHER_GROWTH_SPHERICAL_VS_ADHERE    | -0,043 | 0,241 | 0,1527  | 1 |
| KEGG_GLYOXYLATE_AND_DICARBOXYLATE_M    | -0,043 | 0,241 | 0,77044 | 1 |
| GSE7400_CTRL_VS_CSF3_IN_VIVO_TREATE    | -0,043 | 0,241 | 0,3224  | 1 |
| WANG_NFKB_TARGETS                      | -0,043 | 0,241 | 0,03176 | 1 |
| VISALA_RESPONSE_TO_HEAT_SHOCK_AND_I    | -0,043 | 0,241 | 0,35841 | 1 |
| KEGG_ANTIGEN_PROCESSING_AND_PRESENTA   | -0,043 | 0,242 | 0,40199 | 1 |
| MEISSNER_BRAIN_ICP_WITH_H3K4ME3        | -0,043 | 0,242 | 0,00113 | 1 |
| IVANOVSKA_MIR106B_TARGETS              | -0,043 | 0,242 | 0,10215 | 1 |
| GSE17721_0.5H_VS_24H_PAM3CSK4_BMDM     | -0,043 | 0,242 | 0,46197 | 1 |
| KEGG_TAURINE_AND_HYPOTAURINE_METABO    | 0,043  | 0,242 | 0,95371 | 1 |
| DNA_DAMAGE_RESPONSESIGNAL_TRANSDUC     | -0,043 | 0,242 | 0,80083 | 1 |
| SCHLOSSER_SERUM_RESPONSE_UP            | -0,043 | 0,243 | 0,01457 | 1 |
| WU_HBX_TARGETS_1_DN                    | -0,043 | 0,243 | 0,12428 | 1 |

|                                       |        |       |         |   |
|---------------------------------------|--------|-------|---------|---|
| SHARMA_PILOCYTIC_ASTROCYTOMA_LOCALI   | -0,043 | 0,243 | 0,30082 | 1 |
| KRAS.AMP.LUNG_UP.V1_UP                | -0,043 | 0,243 | 0,05766 | 1 |
| chr2q21                               | -0,043 | 0,244 | 0,0004  | 1 |
| MACROMOLECULE_CATABOLIC_PROCESS       | -0,043 | 0,244 | 0,69469 | 1 |
| KYNG_DNA_DAMAGE_BY_4NQO               | -0,043 | 0,244 | 0,07551 | 1 |
| KASLER_HDAC7_TARGETS_2_UP             | -0,043 | 0,244 | 0,02043 | 1 |
| NELSON_RESPONSE_TO_ANDROGEN_DN        | -0,043 | 0,244 | 0,03831 | 1 |
| LUI_THYROID_CANCER_CLUSTER_5          | 0,043  | 0,244 | 0,28142 | 1 |
| MORF_FLT1                             | -0,043 | 0,244 | 0,01595 | 1 |
| MARKS_HDAC_TARGETS_DN                 | -0,043 | 0,245 | 0,63797 | 1 |
| WOTTON_RUNX_TARGETS_UP                | -0,043 | 0,245 | 0,20863 | 1 |
| VECCHI_GASTRIC_CANCER_ADVANCED_VS_E   | 0,043  | 0,245 | 0,47904 | 1 |
| SUBTIL_PROGESTIN_TARGETS              | -0,043 | 0,245 | 0,03305 | 1 |
| HUMMERICH_MALIGNANT_SKIN_TUMOR_DN     | -0,043 | 0,246 | 0,03886 | 1 |
| PARENT_MTOR_SIGNALING_UP              | -0,043 | 0,246 | 0,00149 | 1 |
| GROSS_HIF1A_TARGETS_UP                | -0,043 | 0,246 | 0,21822 | 1 |
| GAUSSMANN_MLL_AF4_FUSION_TARGETS_B    | -0,043 | 0,246 | 0,02729 | 1 |
| REGULATION_OF_RAS_PROTEIN_SIGNAL_TRA  | -0,043 | 0,246 | 0,14216 | 1 |
| MEINHOLD_OVARIAN_CANCER_LOW_GRADE_    | -0,042 | 0,247 | 0,11225 | 1 |
| DOANE_RESPONSE_TO_ANDROGEN_UP         | -0,042 | 0,247 | 0,00496 | 1 |
| MICROSOME                             | 0,042  | 0,247 | 0,49073 | 1 |
| GSE22886_IGM_MEMORY_BCELL_VS_BLOOD_   | -0,042 | 0,247 | 0,84627 | 1 |
| COFACTOR_BINDING                      | -0,042 | 0,247 | 0,00217 | 1 |
| MODULE_310                            | 0,042  | 0,247 | 0,30852 | 1 |
| GSE24142_EARLY_THYMIC_PROGENITOR_VS_  | -0,042 | 0,247 | 0,15692 | 1 |
| GNF2_CDKN1C                           | -0,042 | 0,248 | 0,03139 | 1 |
| GSE18791_CTRL_VS_NEWCASTLE_VIRUS_DC   | -0,042 | 0,248 | 0,55562 | 1 |
| GSE37416_0H_VS_24H_F_TULARENSIS_LVS   | -0,042 | 0,248 | 0,21346 | 1 |
| GSE9988_LOW_LPS_VS_CTRL_TREATED_MO    | -0,042 | 0,248 | 0,0909  | 1 |
| ZHU_CMV_8_HR_UP                       | -0,042 | 0,248 | 0,60553 | 1 |
| ACTIVATION_OF_PROTEIN_KINASE_ACTIVITY | -0,042 | 0,249 | 0,07704 | 1 |
| MORF_PML                              | -0,042 | 0,249 | 0,00749 | 1 |
| PHOSPHOLIPASE_A2_ACTIVITY             | -0,042 | 0,25  | 0,02854 | 1 |
| LAIHO_COLORECTAL_CANCER_SERRATED_DN   | -0,042 | 0,25  | 0,01536 | 1 |
| GSE17974_0H_VS_2H_IN_VITRO_ACT_CD4_   | -0,042 | 0,25  | 0,00691 | 1 |
| ROYLANCE_BREAST_CANCER_16Q_COPY_NU    | -0,042 | 0,25  | 0,97182 | 1 |
| MORF_ETV3                             | -0,042 | 0,25  | 0,01799 | 1 |
| chr19p                                | 0,042  | 0,251 | 0,33084 | 1 |
| REACTOME_REGULATION_OF_IFNA_SIGNALIN  | -0,042 | 0,251 | 0,55693 | 1 |
| WIKMAN_ASBESTOS_LUNG_CANCER_UP        | -0,042 | 0,251 | 0,04689 | 1 |
| REACTOME_METABOLISM_OF_LIPIDS_AND_LII | -0,042 | 0,251 | 0,03424 | 1 |
| REACTOME_RESOLUTION_OF_AP_SITES_VIA_  | -0,042 | 0,251 | 0,09016 | 1 |



|                                      |        |       |         |   |
|--------------------------------------|--------|-------|---------|---|
| MODULE_346                           | 0,042  | 0,251 | 0,21313 | 1 |
| STAMBOLSKY_TARGETS_OF_MUTATED_TP53   | -0,042 | 0,252 | 0,09633 | 1 |
| HYDROLASE_ACTIVITY_ACTING_ON_ACID_AN | 0,042  | 0,252 | 0,48371 | 1 |
| NAKAJIMA_MAST_CELL                   | -0,042 | 0,253 | 0,00472 | 1 |
| LUND_SILENCED_BY_METHYLATION         | -0,042 | 0,253 | 0,56454 | 1 |
| ADAPTIVE_IMMUNE_RESPONSE             | -0,042 | 0,253 | 0,29774 | 1 |
| REGULATION_OF_RHO_PROTEIN_SIGNAL_TRA | -0,042 | 0,254 | 0,09562 | 1 |
| HOFFMANN_LARGE_TO_SMALL_PRE_BII_LYMI | -0,042 | 0,254 | 0,03348 | 1 |
| REACTOME_ACTIVATED_TLR4_SIGNALLING   | -0,042 | 0,254 | 0,25577 | 1 |
| GSE360_CTRL_VS_L_DONOVANI_MAC_UP     | -0,042 | 0,254 | 0,15039 | 1 |
| REACTOME_ADP_SIGNALLING_THROUGH_P2R  | -0,042 | 0,255 | 0,16107 | 1 |
| STREICHER_LSM1_TARGETS_UP            | -0,042 | 0,255 | 0,06132 | 1 |
| RICKMAN_TUMOR_DIFFERENTIATED_WELL_VS | -0,042 | 0,256 | 0,01492 | 1 |
| MORF_JAK3                            | -0,042 | 0,256 | 0,00254 | 1 |
| KEGG_ARGININE_AND_PROLINE_METABOLISM | -0,042 | 0,256 | 0,09689 | 1 |
| GSE13484_12H_UNSTIM_VS_YF17D_VACCIN  | -0,042 | 0,256 | 0,12077 | 1 |
| ORGANIC_ACID_TRANSMEMBRANE_TRANSPOR  | -0,042 | 0,256 | 0,19833 | 1 |
| REACTOME_SIGNALING_BY_NOTCH2         | 0,042  | 0,257 | 0,931   | 1 |
| GSE27786_BCELL_VS_ERYTHROBLAST_UP    | -0,042 | 0,257 | 0,22416 | 1 |
| SIRNA EIF4GI_UP                      | -0,042 | 0,257 | 0,37798 | 1 |
| NEGATIVE_REGULATION_OF_CELLULAR_BIOS | 0,042  | 0,257 | 0,91191 | 1 |
| REACTOME_BIOSYNTHESIS_OF_THE_N_GLYCA | 0,042  | 0,257 | 0,21632 | 1 |
| GSE3982_MAC_VS_TH2_UP                | 0,042  | 0,258 | 0,65946 | 1 |
| MODULE_152                           | 0,041  | 0,258 | 0,16092 | 1 |
| REACTOME_SIGNALING_BY_NOTCH3         | 0,041  | 0,259 | 0,94079 | 1 |
| CHEOK_RESPONSE_TO_MERCAPTOPURINE_AN  | -0,041 | 0,259 | 0,09576 | 1 |
| GCM_LTK                              | -0,041 | 0,259 | 0,08139 | 1 |
| REACTOME_SIGNALING_BY_NOTCH4         | 0,041  | 0,259 | 0,75008 | 1 |
| GSE17721_POLYIC_VS_GARDIQUIMOD_4H_BI | -0,041 | 0,26  | 0,04881 | 1 |
| RAMALHO_STEMNESS_DN                  | -0,041 | 0,26  | 0,06753 | 1 |
| ADAPTIVE_IMMUNE_RESPONSE_GO_0002460  | -0,041 | 0,26  | 0,30271 | 1 |
| REACTOME_GLUCAGON_TYPE_LIGAND_RECEP  | -0,041 | 0,26  | 0,01866 | 1 |
| CARBOHYDRATE_BINDING                 | -0,041 | 0,261 | 0,06548 | 1 |
| PROTEIN_HOMOOIGOMERIZATION           | 0,041  | 0,261 | 0,93647 | 1 |
| chr2q31                              | 0,041  | 0,261 | 0,66395 | 1 |
| chr5q34                              | -0,041 | 0,262 | 0,07574 | 1 |
| BUKANOVICH_T_LYMPHOCYTE_HOMING_ON    | -0,041 | 0,262 | 0,04359 | 1 |
| ORGANIC_ACID_METABOLIC_PROCESS       | -0,041 | 0,263 | 0,01348 | 1 |
| GSE24634_IL4_VS_CTRL_TREATED_NAIVE_C | -0,041 | 0,263 | 0,4983  | 1 |
| BIOCARTA_DC_PATHWAY                  | -0,041 | 0,263 | 0,3821  | 1 |
| KEGG_LINOLEIC_ACID_METABOLISM        | 0,041  | 0,263 | 0,65349 | 1 |
| GSE37416_OH_VS_12H_F_TULARENSIS_LVS  | -0,041 | 0,263 | 0,07218 | 1 |

|                                        |        |       |         |   |
|----------------------------------------|--------|-------|---------|---|
| GSE22886_DAY0_VS_DAY7_MONOCYTE_IN_     | -0,041 | 0,263 | 0,04645 | 1 |
| CTGTTAC,MIR-194                        | -0,041 | 0,263 | 0,25407 | 1 |
| SAGIV_CD24_TARGETS_DN                  | -0,041 | 0,263 | 0,21059 | 1 |
| GSE22886_UNSTIM_VS_STIM_MEMORY_TCEL    | -0,041 | 0,264 | 0,02594 | 1 |
| NEMETH_INFLAMMATORY_RESPONSE_LPS_UP    | -0,041 | 0,264 | 0,54726 | 1 |
| STEIN_ESRRA_TARGETS_UP                 | -0,041 | 0,264 | 0,62105 | 1 |
| OUELLET_OVARIAN_CANCER_INVASIVE_VS_L   | 0,041  | 0,264 | 0,33351 | 1 |
| REACTOME_REGULATION_OF_ORNITHINE_DEC   | -0,041 | 0,264 | 0,56426 | 1 |
| LU_TUMOR_VASCULATURE_DN                | -0,041 | 0,265 | 0,00029 | 1 |
| RESPONSE_TO_VIRUS                      | -0,041 | 0,265 | 0,35503 | 1 |
| GESERICK_TERT_TARGETS_DN               | -0,041 | 0,265 | 0,00093 | 1 |
| GUILLAUMOND_KLF10_TARGETS_DN           | -0,041 | 0,265 | 0,39141 | 1 |
| GSE17721_0.5H_VS_12H_POLYIC_BMDM_DN    | -0,041 | 0,266 | 0,21787 | 1 |
| BARRIER_CANCER_RELAPSE_TUMOR_SAMPLE_   | -0,041 | 0,266 | 0,39114 | 1 |
| ROSS_AML_WITH_MLL_FUSIONS              | 0,041  | 0,266 | 0,81115 | 1 |
| YOKOE_CANCER_TESTIS_ANTIGENS           | -0,041 | 0,266 | 0,0908  | 1 |
| TONKS_TARGETS_OF_RUNX1_RUNX1T1_FUSI    | -0,041 | 0,266 | 0,23318 | 1 |
| GSE1432_1H_VS_6H_IFNG_MICROGLIA_DN     | -0,041 | 0,267 | 0,60748 | 1 |
| chr7p11                                | -0,041 | 0,267 | 0,55875 | 1 |
| AGUIRRE_PANCREATIC_CANCER_COPY_NUMBI   | -0,041 | 0,268 | 0,07372 | 1 |
| SPECIFIC_TRANSCRIPTIONAL_REPRESSOR_ACT | -0,041 | 0,268 | 0,0072  | 1 |
| BIOCARTA_COMP_PATHWAY                  | 0,041  | 0,268 | 0,69074 | 1 |
| VERNELL_RETINOBLASTOMA_PATHWAY_DN      | -0,041 | 0,268 | 0,06108 | 1 |
| NICK_RESPONSE_TO_PROC_TREATMENT_UP     | -0,041 | 0,268 | 0,28528 | 1 |
| XU_RESPONSE_TO_TRETINOIN_AND_NSC682!   | -0,041 | 0,269 | 0,83524 | 1 |
| HECKER_IFNB1_TARGETS                   | -0,041 | 0,269 | 0,47679 | 1 |
| chr16p11                               | 0,041  | 0,269 | 0,99546 | 1 |
| PLASARI_TGFB1_TARGETS_1HR_DN           | -0,041 | 0,269 | 0,00773 | 1 |
| GSE3982_BASOPHIL_VS_EFF_MEMORY_CD4_    | -0,041 | 0,269 | 0,07309 | 1 |
| GSE360_CTRL_VS_T_GONDII_DC_UP          | -0,041 | 0,269 | 0,04996 | 1 |
| GSE24634_IL4_VS_CTRL_TREATED_NAIVE_C   | -0,041 | 0,269 | 0,41247 | 1 |
| CELLULAR_LIPID_METABOLIC_PROCESS       | -0,041 | 0,269 | 0,02234 | 1 |
| MODULE_79                              | -0,041 | 0,27  | 0,19429 | 1 |
| PRIMARY_ACTIVE_TRANSMEMBRANE_TRANSP    | 0,041  | 0,27  | 0,45705 | 1 |
| REACTOME_RNA_POL_I_TRANSCRIPTION_TER   | -0,04  | 0,27  | 0,18523 | 1 |
| PHOTOTRANSDUCTION                      | -0,04  | 0,27  | 0,001   | 1 |
| GSE3982_NEUTROPHIL_VS_EFF_MEMORY_CD    | -0,04  | 0,27  | 0,41366 | 1 |
| GLUCOSE_CATABOLIC_PROCESS              | 0,04   | 0,27  | 0,43256 | 1 |
| REACTOME_GLUCOSE_METABOLISM            | 0,04   | 0,27  | 0,06622 | 1 |
| REACTOME_FORMATION_OF_FIBRIN_CLOT_CL   | -0,04  | 0,271 | 0,01592 | 1 |
| REACTOME_HOMOLOGOUS_RECOMBINATION_I    | -0,04  | 0,271 | 0,68236 | 1 |
| GSE360_L_MAJOR_VS_M_TUBERCULOSIS_DC    | -0,04  | 0,271 | 0,07949 | 1 |

|                                       |       |       |         |   |
|---------------------------------------|-------|-------|---------|---|
| MODULE_335                            | 0,04  | 0,271 | 0,07388 | 1 |
| chr2q22                               | -0,04 | 0,272 | 0,41304 | 1 |
| EXTRACELLULAR_LIGAND_GATED_ION_CHANI  | -0,04 | 0,272 | 0,14374 | 1 |
| LANDIS_ERBB2_BREAST_TUMORS_65_UP      | -0,04 | 0,273 | 0,59124 | 1 |
| HEME_METABOLIC_PROCESS                | 0,04  | 0,273 | 0,50579 | 1 |
| KOBAYASHI_EGFR_SIGNALING_6HR_UP       | -0,04 | 0,273 | 0,09192 | 1 |
| GSE20151_CTRL_VS_FUSOBACT_NUCLEATUM   | -0,04 | 0,273 | 0,03525 | 1 |
| GSE3982_NEUTROPHIL_VS_CENT_MEMORY_C   | -0,04 | 0,273 | 0,42821 | 1 |
| TCGA_GLIOMASTOMA_COPY_NUMBER_DN       | -0,04 | 0,273 | 0,18072 | 1 |
| chr3p24                               | -0,04 | 0,274 | 0,03363 | 1 |
| GSE7460_FOXP3_MUT_VS_WT_ACT_TCONV.    | -0,04 | 0,274 | 0,19048 | 1 |
| GSE3982_MAC_VS_TH1_UP                 | 0,04  | 0,274 | 0,46313 | 1 |
| CHESLER_BRAIN_D6MIT150_QTL_TRANS      | -0,04 | 0,274 | 0,55616 | 1 |
| MODULE_50                             | -0,04 | 0,275 | 0,65938 | 1 |
| WAKABAYASHI_ADIPOGENESIS_PPARG_RXRA   | 0,04  | 0,275 | 0,7332  | 1 |
| VANDESLUIS_COMMD1_TARGETS_GROUP_2_I   | -0,04 | 0,275 | 0,41324 | 1 |
| KEGG_SPHINGOLIPID_METABOLISM          | 0,04  | 0,275 | 0,60432 | 1 |
| BRCHAT_RESPONSE_TO_METHOTREXATE_UI    | 0,04  | 0,275 | 0,37059 | 1 |
| GSE3982_NEUTROPHIL_VS_BASOPHIL_UP     | -0,04 | 0,275 | 0,02277 | 1 |
| chr7p13                               | -0,04 | 0,275 | 0,02836 | 1 |
| ATPASE_ACTIVITY_COUPLED_TO_MOVEMENT   | 0,04  | 0,275 | 0,46383 | 1 |
| REACTOME_GAMMA_CARBOXYLATION_TRANS    | 0,04  | 0,276 | 0,45734 | 1 |
| CAR_IGFBP1                            | -0,04 | 0,276 | 0,01081 | 1 |
| PELLICCIOTTA_HDAC_IN_ANTIGEN_PRESENTA | 0,04  | 0,276 | 0,02089 | 1 |
| BOYALT_LIVER_CANCER_SUBCLASS_G12_U    | 0,04  | 0,276 | 0,29224 | 1 |
| SPERM_MOTILITY                        | -0,04 | 0,277 | 0,19189 | 1 |
| GNF2_PRDX2                            | -0,04 | 0,277 | 0,4846  | 1 |
| JIANG_AGING_HYPOTHALAMUS_DN           | -0,04 | 0,277 | 0,09872 | 1 |
| REACTOME_ABCA_TRANSPORTERS_IN_LIPID_  | -0,04 | 0,278 | 0,00053 | 1 |
| TARTE_PLASMA_CELL_VS_B_LYMPHOCYTE_I   | -0,04 | 0,278 | 0,15063 | 1 |
| MIKKELSEN_IPS_LCP_WITH_H3K4ME3        | -0,04 | 0,278 | 0,01827 | 1 |
| REACTOME_ADENYLATE_CYCLASE_INHIBITOR  | -0,04 | 0,279 | 0,00099 | 1 |
| SEKI_INFLAMMATORY_RESPONSE_LPS_DN     | -0,04 | 0,279 | 0,00173 | 1 |
| TAATAAT,MIR-126                       | -0,04 | 0,279 | 0,06705 | 1 |
| REACTOME_VITAMIN_B5_PANTOTHENATE_ME   | -0,04 | 0,279 | 0,11966 | 1 |
| BIOCARTA_AKAP95_PATHWAY               | -0,04 | 0,279 | 0,63249 | 1 |
| GSE3982_BCELL_VS_TH2_UP               | -0,04 | 0,279 | 0,08016 | 1 |
| MORF_PSMC1                            | -0,04 | 0,279 | 0,9892  | 1 |
| GSE7852_THYMUS_VS_FAT_TREG_DN         | -0,04 | 0,279 | 0,0766  | 1 |
| CHANG_POU5F1_TARGETS_UP               | -0,04 | 0,28  | 0,2003  | 1 |
| REACTOME_NUCLEOTIDE_BINDING_DOMAIN_L  | -0,04 | 0,28  | 0,44869 | 1 |
| DEMAGALHAES_AGING_DN                  | -0,04 | 0,28  | 0,09865 | 1 |

|                                         |        |       |         |   |
|-----------------------------------------|--------|-------|---------|---|
| GSE13484_UNSTIM_VS_3H_YF17D_VACCINE     | -0,04  | 0,28  | 0,00193 | 1 |
| REACTOME_PHASE_II_CONJUGATION           | 0,04   | 0,281 | 0,23996 | 1 |
| CERVERA_SDHB_TARGETS_1_DN               | -0,04  | 0,281 | 0,01958 | 1 |
| MODULE_172                              | -0,04  | 0,281 | 0,24095 | 1 |
| GSE14769_40MIN_VS_360MIN_LPS_BMDM_U     | -0,04  | 0,282 | 0,1247  | 1 |
| LIU_SMARCA4_TARGETS                     | -0,04  | 0,282 | 0,02223 | 1 |
| PID_HDAC_CLASSIII_PATHWAY               | -0,039 | 0,282 | 0,1428  | 1 |
| LU_EZH2_TARGETS_UP                      | -0,039 | 0,282 | 0,25012 | 1 |
| GSE2706_UNSTIM_VS_8H_LPS_DC_UP          | -0,039 | 0,282 | 0,00171 | 1 |
| NEGATIVE_REGULATION_OF_BIOSYNTHETIC_F   | 0,039  | 0,282 | 0,82869 | 1 |
| REACTOME_BASE_EXCISION_REPAIR           | -0,039 | 0,283 | 0,08979 | 1 |
| SCHRAETS_MLL_TARGETS_DN                 | -0,039 | 0,283 | 0,14554 | 1 |
| REACTOME_INTERACTION_BETWEEN_L1_AND     | -0,039 | 0,283 | 0,03404 | 1 |
| GROSS_ELK3_TARGETS_DN                   | -0,039 | 0,284 | 0,74022 | 1 |
| REACTOME_INHIBITION_OF_REPLICATION_INIT | -0,039 | 0,284 | 0,98463 | 1 |
| ACTIN_FILAMENT_ORGANIZATION             | 0,039  | 0,284 | 0,36199 | 1 |
| GSE17721_CPG_VS_GARDIQUIMOD_12H_BMI     | -0,039 | 0,284 | 0,24311 | 1 |
| BILANGES_RAPAMYCIN_SENSITIVE_GENES      | -0,039 | 0,284 | 0,12812 | 1 |
| MYLLYKANGAS_AMPLIFICATION_HOT_SPOT_6    | 0,039  | 0,284 | 0,74166 | 1 |
| GABRIELY_MIR21_TARGETS                  | -0,039 | 0,285 | 0,35926 | 1 |
| chr12q15                                | -0,039 | 0,285 | 0,10375 | 1 |
| ROETH_TERT_TARGETS_UP                   | -0,039 | 0,285 | 0,50562 | 1 |
| REACTOME_SIGNALING_BY_WNT               | -0,039 | 0,285 | 0,54906 | 1 |
| MCLACHLAN_DENTAL_CARIES_UP              | -0,039 | 0,285 | 0,5137  | 1 |
| WEST_ADRENOCORTICAL_CARCINOMA_VS_AI     | -0,039 | 0,285 | 0,9151  | 1 |
| MOOTHA_PGC                              | -0,039 | 0,286 | 0,77943 | 1 |
| BAUS_TFF2_TARGETS_UP                    | -0,039 | 0,286 | 0,04314 | 1 |
| ATP_DEPENDENT_RNA_HELICASE_ACTIVITY     | -0,039 | 0,286 | 0,97767 | 1 |
| VALK_AML_CLUSTER_11                     | -0,039 | 0,286 | 0,09546 | 1 |
| KOINUMA_COLON_CANCER_MSI_UP             | -0,039 | 0,287 | 0,42686 | 1 |
| PID_TELOMERASEPATHWAY                   | -0,039 | 0,287 | 0,19336 | 1 |
| OXIDOREDUCTASE_ACTIVITY_ACTING_ON_TH    | -0,039 | 0,287 | 0,02504 | 1 |
| V\$FXR_IR1_Q6                           | -0,039 | 0,287 | 0,0008  | 1 |
| CYTOSOL                                 | -0,039 | 0,287 | 0,00768 | 1 |
| IIZUKA_LIVER_CANCER_PROGRESSION_L1_G1   | -0,039 | 0,288 | 0,2116  | 1 |
| REACTOME_BINDING_AND_ENTRY_OF_HIV_VI    | -0,039 | 0,288 | 0,39254 | 1 |
| HSIAO_LIVER_SPECIFIC_GENES              | 0,039  | 0,288 | 0,83722 | 1 |
| MCCOLLUM_GELDANAMYCIN_RESISTANCE_UP     | -0,039 | 0,288 | 0,01095 | 1 |
| PID_VEGFR1_PATHWAY                      | -0,039 | 0,288 | 0,35942 | 1 |
| REACTOME_MITOCHONDRIAL_FATTY_ACID_BI    | 0,039  | 0,289 | 0,63965 | 1 |
| KANG_AR_TARGETS_DN                      | -0,039 | 0,289 | 0,5524  | 1 |
| GSE1432_CTRL_VS_IFNG_6H_MICROGLIA_DN    | -0,039 | 0,29  | 0,54438 | 1 |

|                                      |        |       |         |   |
|--------------------------------------|--------|-------|---------|---|
| BIOCARTA_LEPTIN_PATHWAY              | -0,039 | 0,29  | 0,06472 | 1 |
| V\$PPARG_01                          | -0,039 | 0,29  | 0,43213 | 1 |
| RESPONSE_TO_OTHER_ORGANISM           | -0,039 | 0,29  | 0,37713 | 1 |
| MARSON_FOXP3_TARGETS_UP              | -0,039 | 0,29  | 0,18059 | 1 |
| LUCAS_HNF4A_TARGETS_UP               | 0,039  | 0,291 | 0,72811 | 1 |
| PROTEIN_N_TERMINUS_BINDING           | 0,039  | 0,291 | 0,21734 | 1 |
| DONATO_CELL_CYCLE_TRETINOIN          | 0,039  | 0,291 | 0,47254 | 1 |
| CARBONATE_DEHYDRATASE_ACTIVITY       | -0,039 | 0,291 | 0,0889  | 1 |
| MONOVALENT_INORGANIC_CATION_TRANSME  | 0,039  | 0,292 | 0,86192 | 1 |
| METABOTROPIC_GlutamateGABA_B_LIKE_R  | -0,039 | 0,292 | 0,35531 | 1 |
| chr8q                                | -0,039 | 0,292 | 0,92412 | 1 |
| MORF_DDX11                           | -0,039 | 0,292 | 0,01611 | 1 |
| BOYALT_LIVER_CANCER_SUBCLASS_G5_DN   | -0,039 | 0,292 | 0,40412 | 1 |
| GSE360_L_DONOVANI_VS_M_TUBERCULOSIS  | -0,039 | 0,293 | 0,647   | 1 |
| GSE13484_UNSTIM_VS_12H_YF17D_VACCIN  | -0,039 | 0,293 | 0,40471 | 1 |
| GAUSSMANN_MLL_AF4_FUSION_TARGETS_D   | 0,039  | 0,293 | 0,89483 | 1 |
| HOEGERKORP_CD44_TARGETS_TEMPORAL_DI  | -0,039 | 0,293 | 0,65465 | 1 |
| HOLLEMAN_ASPARAGINASE_RESISTANCE_B   | -0,038 | 0,294 | 0,19265 | 1 |
| JI_METASTASIS_REPRESSED_BY_STK11     | -0,038 | 0,294 | 0,05566 | 1 |
| MITOCHONDRIAL_RESPIRATORY_CHAIN      | 0,038  | 0,294 | 0,21286 | 1 |
| SHIRAIISHI_PLZF_TARGETS_UP           | -0,038 | 0,294 | 0,3465  | 1 |
| REACTOME_ACTIVATED_TAK1_MEDIATES_P3  | -0,038 | 0,295 | 0,88295 | 1 |
| PID_RETINOIC_ACID_PATHWAY            | -0,038 | 0,295 | 0,09531 | 1 |
| REACTOME_FORMATION_OF_TRANSCRIPTION  | 0,038  | 0,295 | 0,43771 | 1 |
| SCHAEFFER_PROSTATE_DEVELOPMENT_AND   | -0,038 | 0,296 | 0,20951 | 1 |
| HEMOSTASIS                           | -0,038 | 0,296 | 0,00211 | 1 |
| GSE17721_0.5H_VS_4H_GARDIQUIMOD_BMD  | -0,038 | 0,296 | 0,15299 | 1 |
| MODULE_333                           | 0,038  | 0,297 | 0,30856 | 1 |
| GNF2_SPI1                            | 0,038  | 0,297 | 0,24573 | 1 |
| KEGG_GLYCOSAMINOGLYCAN_DEGRADATION   | -0,038 | 0,298 | 0,16086 | 1 |
| REACTOME_SPHINGOLIPID_METABOLISM     | 0,038  | 0,298 | 0,5525  | 1 |
| MODULE_128                           | -0,038 | 0,298 | 0,22459 | 1 |
| MODULE_492                           | 0,038  | 0,298 | 0,99647 | 1 |
| RODRIGUES_NTN1_AND_DCC_TARGETS       | -0,038 | 0,298 | 0,00054 | 1 |
| KARLSSON_TGFB1_TARGETS_DN            | -0,038 | 0,298 | 0,02202 | 1 |
| GSE22886_IGG_IGA_MEMORY_BCELL_VS_BL  | -0,038 | 0,298 | 0,62232 | 1 |
| GSE17721_PAM3CSK4_VS_CPG_12H_BMDM    | -0,038 | 0,298 | 0,18827 | 1 |
| KINNEY_DNMT1_METHYLATION_TARGETS     | -0,038 | 0,299 | 0,01389 | 1 |
| JOHNSTONE_PARVB_TARGETS_3_UP         | -0,038 | 0,299 | 0,09815 | 1 |
| SEITZ_NEOPLASTIC_TRANSFORMATION_BY_8 | -0,038 | 0,299 | 0,31028 | 1 |
| REACTOME_TOLL_RECEPTOR_CASCADES      | -0,038 | 0,299 | 0,39166 | 1 |
| ICHIBA_GRAFT_VERSUS_HOST_DISEASE_35D | 0,038  | 0,299 | 0,28437 | 1 |

|                                       |        |       |         |   |
|---------------------------------------|--------|-------|---------|---|
| REACTOME_ABACAVIR_TRANSPORT_AND_ME    | -0,038 | 0,299 | 0,02065 | 1 |
| OUYANG_PROSTATE_CANCER_PROGRESSION_   | -0,038 | 0,3   | 0,14782 | 1 |
| GSE339_CD4POS_VS_CD8POS_DC_IN_CULTU   | -0,038 | 0,3   | 0,35172 | 1 |
| LIPOPROTEIN_BINDING                   | 0,038  | 0,301 | 0,77997 | 1 |
| GUANYL_NUCLEOTIDE_EXCHANGE_FACTOR_A   | -0,038 | 0,301 | 0,02878 | 1 |
| GARGALOVIC_RESPONSE_TO_OXIDIZED_PHOS  | -0,038 | 0,301 | 0,42524 | 1 |
| BIOCARTA_EPO_PATHWAY                  | -0,038 | 0,301 | 0,05007 | 1 |
| GSE17580_UNINFECTED_VS_S_MANSONI_INF  | -0,038 | 0,301 | 0,05476 | 1 |
| GENTILE_UV_RESPONSE_CLUSTER_D5        | -0,038 | 0,301 | 0,08672 | 1 |
| TERAMOTO_OPN_TARGETS_CLUSTER_5        | 0,038  | 0,302 | 0,51535 | 1 |
| REACTOME_RIG_I_MDA5_MEDIATED_INDUCTI  | -0,038 | 0,302 | 0,27837 | 1 |
| MODULE_5                              | -0,038 | 0,302 | 0,12273 | 1 |
| ER_GOLGI_INTERMEDIATE_COMPARTMENT     | -0,038 | 0,302 | 0,68124 | 1 |
| MODULE_91                             | -0,038 | 0,302 | 0,45643 | 1 |
| chr5q11                               | -0,038 | 0,303 | 0,0053  | 1 |
| GSE22886_IGG_IGA_MEMORY_BCELL_VS_BM   | -0,038 | 0,303 | 0,14137 | 1 |
| GSE360_CTRL_VS_M_TUBERCULOSIS_DC_DN   | -0,038 | 0,303 | 0,93783 | 1 |
| HAHTOLA_MYCOSIS_FUNGOIDES_CD4_DN      | -0,038 | 0,303 | 0,124   | 1 |
| LANDIS_BREAST_CANCER_PROGRESSION_DN   | -0,038 | 0,305 | 0,02261 | 1 |
| REACTOME_DOWNSTREAM_TCR_SIGNALING     | -0,038 | 0,305 | 0,25713 | 1 |
| CHO_NR4A1_TARGETS                     | -0,038 | 0,305 | 0,35861 | 1 |
| PETRETTO_BLOOD_PRESSURE_UP            | -0,038 | 0,305 | 0,38504 | 1 |
| GALE_APL_WITH_FLT3_MUTATED_DN         | 0,038  | 0,305 | 0,24137 | 1 |
| HORMONE_BINDING                       | 0,038  | 0,305 | 0,56408 | 1 |
| GSE1432_CTRL_VS_IFNG_24H_MICROGLIA_U  | -0,038 | 0,305 | 0,03571 | 1 |
| MODULE_355                            | -0,038 | 0,306 | 0,78542 | 1 |
| chr7p22                               | -0,038 | 0,306 | 0,08793 | 1 |
| REACTOME_SPHINGOLIPID_DE_NOVO_BIOSYN  | 0,038  | 0,307 | 0,58199 | 1 |
| AGCYRWTC_UNKNOWN                      | -0,037 | 0,307 | 0,00441 | 1 |
| HOUSTIS_ROS                           | 0,037  | 0,307 | 0,30032 | 1 |
| chr17p12                              | -0,037 | 0,308 | 0,1804  | 1 |
| HOWLIN_CITED1_TARGETS_1_DN            | -0,037 | 0,308 | 0,05211 | 1 |
| NOUSHMEHR_GBM_GERMLINE_MUTATED        | -0,037 | 0,308 | 0,50197 | 1 |
| TURJANSKI_MAPK11_TARGETS              | -0,037 | 0,308 | 0,10534 | 1 |
| PURINE_RIBONUCLEOTIDE_METABOLIC_PROCE | 0,037  | 0,308 | 0,44163 | 1 |
| APPEL_IMATINIB_RESPONSE               | 0,037  | 0,308 | 0,21897 | 1 |
| XU_AKT1_TARGETS_6HR                   | -0,037 | 0,309 | 0,24732 | 1 |
| SMID_BREAST_CANCER_ERBB2_UP           | 0,037  | 0,309 | 0,24477 | 1 |
| GSE20366_EX_VIVO_VS_HOMEOSTATIC_CON   | -0,037 | 0,309 | 0,0805  | 1 |
| KANG_DOXORUBICIN_RESISTANCE_DN        | -0,037 | 0,31  | 0,67029 | 1 |
| GSE1460_DP_THYMOCYTE_VS_NAIVE_CD4_1   | -0,037 | 0,31  | 0,03105 | 1 |
| GLAND_DEVELOPMENT                     | -0,037 | 0,31  | 0,04308 | 1 |

|                                       |        |       |         |   |
|---------------------------------------|--------|-------|---------|---|
| CARBOXYLIC_ACID_METABOLIC_PROCESS     | -0,037 | 0,31  | 0,01642 | 1 |
| REACTOME_RECRUITMENT_OF_NUMA_TO_MIT   | -0,037 | 0,311 | 0,0953  | 1 |
| REACTOME_PROTEOLYTIC_CLEAVAGE_OF_SN   | 0,037  | 0,311 | 0,74298 | 1 |
| GLIOGENESIS                           | -0,037 | 0,311 | 0,07345 | 1 |
| RESPONSE_TO_BACTERIUM                 | -0,037 | 0,311 | 0,29758 | 1 |
| REACTOME_SIGNAL_REGULATORY_PROTEIN_S  | -0,037 | 0,312 | 0,51675 | 1 |
| GNF2_PAK2                             | -0,037 | 0,312 | 0,39703 | 1 |
| GARGALOVIC_RESPONSE_TO_OXIDIZED_PHOS  | -0,037 | 0,312 | 0,18676 | 1 |
| chr13q13                              | -0,037 | 0,312 | 0,0507  | 1 |
| chr5q12                               | -0,037 | 0,312 | 0,05232 | 1 |
| SPHINGOLIPID_BIOSYNTHETIC_PROCESS     | -0,037 | 0,313 | 0,06847 | 1 |
| ENERGY_DERIVATION_BY_OXIDATION_OF_ORI | -0,037 | 0,313 | 0,14556 | 1 |
| NUMATA_CSF3_SIGNALING_VIA_STAT3       | -0,037 | 0,313 | 0,08744 | 1 |
| REACTOME_GLYCOPROTEIN_HORMONES        | -0,037 | 0,313 | 0,20381 | 1 |
| HENDRICKS_SMARCA4_TARGETS_DN          | -0,037 | 0,314 | 0,0218  | 1 |
| DEMAGALHAES_AGING_UP                  | -0,037 | 0,314 | 0,32522 | 1 |
| GSE16755_CTRL_VS_IFNA_TREATED_MAC_U   | -0,037 | 0,314 | 0,02981 | 1 |
| HOEGERKORP_CD44_TARGETS_DIRECT_DN     | 0,037  | 0,315 | 0,92731 | 1 |
| CHEOK_RESPONSE_TO_MERCAPTOPURINE_AN   | 0,037  | 0,315 | 0,28153 | 1 |
| DNA_CATABOLIC_PROCESS                 | -0,037 | 0,315 | 0,60699 | 1 |
| ACETYL GALACTOSAMINYLTRANSFERASE_ACT  | -0,037 | 0,315 | 0,30036 | 1 |
| BIOCARTA_CTL_PATHWAY                  | -0,037 | 0,316 | 0,3757  | 1 |
| GSE29618_PRE_VS_DAY7_FLU_VACCINE_MC   | -0,037 | 0,316 | 0,04918 | 1 |
| LEE_LIVER_CANCER_SURVIVAL_UP          | 0,037  | 0,316 | 0,40663 | 1 |
| REACTOME_AQUAPORIN_MEDIATED_TRANSPC   | -0,037 | 0,318 | 0,06701 | 1 |
| ROZANOV_MMP14_CORRELATED              | -0,037 | 0,318 | 0,52122 | 1 |
| AMINE_METABOLIC_PROCESS               | -0,037 | 0,318 | 0,0835  | 1 |
| KEGG_PROXIMAL_TUBULE_BICARBONATE_REC  | 0,037  | 0,319 | 0,63658 | 1 |
| STTTCRNTTT_V\$IRF_Q6                  | -0,037 | 0,319 | 0,11413 | 1 |
| NUCLEOBASENUCLEOSIDENUCLEOTIDE_AND_I  | -0,037 | 0,319 | 0,56546 | 1 |
| chr17q12                              | -0,036 | 0,32  | 0,12478 | 1 |
| GSE3982_EOSINOPHIL_VS_NEUTROPHIL_DN   | -0,036 | 0,32  | 0,18054 | 1 |
| SARTIPY_NORMAL_AT_INSULIN_RESISTANCE_ | -0,036 | 0,32  | 0,00154 | 1 |
| HOLLEMAN_DAUNORUBICIN_B_ALL_DN        | -0,036 | 0,32  | 0,02648 | 1 |
| BIOCARTA_LYM_PATHWAY                  | -0,036 | 0,321 | 0,66996 | 1 |
| GSE18791_UNSTIM_VS_NEWCATSLE_VIRUS_   | -0,036 | 0,321 | 0,44944 | 1 |
| REACTOME_OLFACTORY_SIGNALING_PATHWA   | -0,036 | 0,321 | 0,45062 | 1 |
| chr4p11                               | 0,036  | 0,322 | 0,54124 | 1 |
| GSE11864_CSF1_IFNG_VS_CSF1_PAM3CYS_   | -0,036 | 0,322 | 0,15914 | 1 |
| DETECTION_OF_STIMULUS_INVOLVED_IN_SEM | -0,036 | 0,322 | 0,00371 | 1 |
| BIOCARTA_LAIR_PATHWAY                 | -0,036 | 0,322 | 0,17989 | 1 |
| GSE17721_LPS_VS_PAM3CSK4_16H_BMDM_    | -0,036 | 0,323 | 0,19889 | 1 |

|                                       |        |       |         |   |
|---------------------------------------|--------|-------|---------|---|
| RHYTHMIC_PROCESS                      | -0,036 | 0,324 | 0,10084 | 1 |
| ZHAN_MULTIPLE_MYELOMA_CD1_AND_CD2_    | -0,036 | 0,324 | 0,01923 | 1 |
| LEE_SP4_THYMOCYTE                     | -0,036 | 0,324 | 0,0204  | 1 |
| CHEN_ETV5_TARGETS_SERTOLI             | -0,036 | 0,325 | 0,64405 | 1 |
| chr5q14                               | 0,036  | 0,325 | 0,62803 | 1 |
| MODULE_519                            | -0,036 | 0,325 | 0,34408 | 1 |
| COFACTOR_TRANSPORT                    | 0,036  | 0,326 | 0,77586 | 1 |
| WENG_POR_TARGETS_LIVER_DN             | -0,036 | 0,326 | 0,03363 | 1 |
| CELL_STRUCTURE_DISASSEMBLY_DURING_AP  | -0,036 | 0,326 | 0,39558 | 1 |
| GSE17721_PAM3CSK4_VS_GADIQUIMOD_24H   | -0,036 | 0,327 | 0,26632 | 1 |
| GSE22886_CTRL_VS_LPS_24H_DC_UP        | -0,036 | 0,327 | 0,1927  | 1 |
| MODULE_265                            | -0,036 | 0,327 | 0,21569 | 1 |
| DOUGLAS_BMI1_TARGETS_DN               | -0,036 | 0,328 | 0,10352 | 1 |
| MICROTUBULE_BASED_MOVEMENT            | -0,036 | 0,328 | 0,77333 | 1 |
| ACTIVE_TRANSMEMBRANE_TRANSPORTER_AC   | -0,036 | 0,328 | 0,13297 | 1 |
| MODULE_445                            | -0,036 | 0,329 | 0,45391 | 1 |
| chr3p14                               | 0,036  | 0,33  | 0,55314 | 1 |
| MODULE_313                            | -0,036 | 0,33  | 0,00703 | 1 |
| GNF2_CASP8                            | -0,036 | 0,33  | 0,26947 | 1 |
| KYNG_ENVIRONMENTAL_STRESS_RESPONSE_   | -0,036 | 0,331 | 0,03674 | 1 |
| OXIDOREDUCTASE_ACTIVITY_ACTING_ON_PEI | -0,036 | 0,331 | 0,12008 | 1 |
| GSE339_CD4POS_VS_CD8POS_DC_DN         | -0,036 | 0,331 | 0,66457 | 1 |
| MODULE_295                            | 0,036  | 0,331 | 0,30164 | 1 |
| MARIADASON_RESPONSE_TO_BUTYRATE_CUF   | -0,036 | 0,331 | 0,14023 | 1 |
| MORI_MATURE_B_LYMPHOCYTE_UP           | -0,036 | 0,332 | 0,19939 | 1 |
| CHUNG_BLISTER_CYTOTOXICITY_UP         | -0,036 | 0,332 | 0,62094 | 1 |
| JIANG_AGING_HYPOTHALAMUS_UP           | 0,036  | 0,332 | 0,30873 | 1 |
| V\$AR_Q2                              | -0,036 | 0,333 | 0,05639 | 1 |
| PID_AR_PATHWAY                        | -0,036 | 0,333 | 0,02632 | 1 |
| chr16q12                              | -0,036 | 0,333 | 0,58887 | 1 |
| GGCGGCA,MIR-371                       | -0,035 | 0,334 | 0,87964 | 1 |
| REACTOME_ACTIVATION_OF_CHAPERONE_GE   | 0,035  | 0,334 | 0,18121 | 1 |
| SODIUM_ION_TRANSPORT                  | -0,035 | 0,334 | 0,00027 | 1 |
| GCM_ERBB2IP                           | 0,035  | 0,334 | 0,46747 | 1 |
| REGULATION_OF_HOMEOSTATIC_PROCESS     | 0,035  | 0,334 | 0,63601 | 1 |
| GSE17721_12H_VS_24H_PAM3CSK4_BMDM.    | -0,035 | 0,335 | 0,05979 | 1 |
| PID_EPHA2_FWDPATHWAY                  | -0,035 | 0,335 | 0,23316 | 1 |
| REACTOME_REGULATION_OF_AMPK_ACTIVITY  | -0,035 | 0,335 | 0,14425 | 1 |
| DUNNE_TARGETS_OF_AML1_MTG8_FUSION_I   | -0,035 | 0,335 | 0,09621 | 1 |
| REACTOME_REGULATION_OF_HYPOXIA_INDUC  | -0,035 | 0,335 | 0,79434 | 1 |
| EPITHELIAL_CELL_DIFFERENTIATION       | -0,035 | 0,335 | 0,87894 | 1 |
| CAFFAREL_RESPONSE_TO_THC_8HR_3_UP     | 0,035  | 0,337 | 0,74162 | 1 |



|                                       |        |       |         |   |
|---------------------------------------|--------|-------|---------|---|
| PID_ANTHRAXPATHWAY                    | -0,035 | 0,337 | 0,135   | 1 |
| HESS_TARGETS_OF_HOXA9_AND_MEIS1_DN    | -0,035 | 0,337 | 0,53662 | 1 |
| GSE18791_CTRL_VS_NEWCASTLE_VIRUS_DC   | -0,035 | 0,337 | 0,57153 | 1 |
| GSE22886_NAIVE_BCELL_VS_MONOCYTE_DN   | 0,035  | 0,338 | 0,13592 | 1 |
| HOXA9_DN.V1_UP                        | -0,035 | 0,338 | 0,22551 | 1 |
| SMALL_CONJUGATING_PROTEIN_SPECIFIC_PR | -0,035 | 0,338 | 0,66445 | 1 |
| BIOCARTA_CARM_ER_PATHWAY              | 0,035  | 0,339 | 0,42019 | 1 |
| GSE360_T_GONDII_VS_M_TUBERCULOSIS_DC  | -0,035 | 0,339 | 0,35239 | 1 |
| GSE37416_0H_VS_24H_F_TULARENSIS_LVS   | -0,035 | 0,339 | 0,22459 | 1 |
| VANDESLUIS_COMMD1_TARGETS_GROUP_4_I   | -0,035 | 0,339 | 0,31718 | 1 |
| MARKEY_RB1_ACUTE_LOF_UP               | -0,035 | 0,339 | 0,45029 | 1 |
| GSE36476_YOUNG_VS_OLD_DONOR_MEMOR     | -0,035 | 0,339 | 0,00965 | 1 |
| NEGATIVE_REGULATION_OF_SECRETION      | -0,035 | 0,339 | 0,18265 | 1 |
| SAKAI_CHRONIC_HEPATITIS_VS_LIVER_CANC | -0,035 | 0,34  | 0,02967 | 1 |
| PID_CDC42_REG_PATHWAY                 | -0,035 | 0,34  | 0,04935 | 1 |
| GSE31082_DN_VS_CD8_SP_THYMOCYTE_DN    | -0,035 | 0,34  | 0,04612 | 1 |
| BALLIF_DEVELOPMENTAL_DISABILITY_P16_P | -0,035 | 0,34  | 0,19175 | 1 |
| YGACNNYACAR_UNKNOWN                   | -0,035 | 0,341 | 0,01984 | 1 |
| GSE17721_0.5H_VS_8H_CPG_BMDM_DN       | -0,035 | 0,341 | 0,40243 | 1 |
| HERNANDEZ_ABERRANT_MITOSIS_BY_DOCET,  | -0,035 | 0,342 | 0,82047 | 1 |
| GSE3982_MAST_CELL_VS_TH1_UP           | -0,035 | 0,342 | 0,08925 | 1 |
| REACTOME_ACTIVATION_OF_CHAPERONE_GE   | -0,035 | 0,342 | 0,88703 | 1 |
| DEN_INTERACT_WITH_LCA5                | -0,035 | 0,342 | 0,34766 | 1 |
| WANG_RESPONSE_TO_FORSKOLIN_DN         | -0,035 | 0,343 | 0,15424 | 1 |
| KEGG_PYRUVATE_METABOLISM              | 0,035  | 0,343 | 0,26527 | 1 |
| DOUBLE_STRANDED_RNA_BINDING           | 0,035  | 0,344 | 0,56145 | 1 |
| GSE22886_NAIVE_CD4_TCELL_VS_12H_ACT   | -0,035 | 0,344 | 0,00022 | 1 |
| GSE9988_ANTI_TREM1_VS_LOW_LPS_MONO    | -0,035 | 0,344 | 0,53239 | 1 |
| DELACROIX_RAR_TARGETS_UP              | -0,035 | 0,344 | 0,09305 | 1 |
| MODULE_170                            | -0,035 | 0,344 | 0,24742 | 1 |
| chr2q37                               | -0,035 | 0,344 | 0,14153 | 1 |
| MODULE_28                             | -0,035 | 0,344 | 0,30357 | 1 |
| ROETH_TERT_TARGETS_DN                 | -0,035 | 0,345 | 0,27211 | 1 |
| EHLERS_ANEUPLOIDY_DN                  | -0,035 | 0,345 | 0,88237 | 1 |
| DAVIES_MULTIPLE_MYELOMA_VS_MGUS_DN    | -0,035 | 0,345 | 0,40669 | 1 |
| CELL_SOMA                             | -0,035 | 0,346 | 0,0162  | 1 |
| WALLACE_PROSTATE_CANCER_RACE_DN       | -0,035 | 0,346 | 0,03943 | 1 |
| GSE39820_TGFBETA1_IL6_VS_TGFBETA1_IL  | -0,035 | 0,346 | 0,25852 | 1 |
| chr13q34                              | -0,035 | 0,346 | 0,03789 | 1 |
| PARK_APL_PATHOGENESIS_DN              | -0,035 | 0,346 | 0,72467 | 1 |
| chr10p11                              | -0,035 | 0,347 | 0,01402 | 1 |
| YRCCAKNNGNCGC_UNKNOWN                 | -0,035 | 0,347 | 0,00024 | 1 |

|                                        |        |       |         |   |
|----------------------------------------|--------|-------|---------|---|
| REACTOME_ANTIGEN_PROCESSING_CROSS_PF   | -0,035 | 0,347 | 0,68276 | 1 |
| ATPASE_ACTIVITY_COUPLED_TO_TRANSMEM    | 0,035  | 0,347 | 0,74246 | 1 |
| MIKKELSEN_MCV6_LCP_WITH_H3K4ME3        | -0,034 | 0,348 | 0,28219 | 1 |
| BRAIN_DEVELOPMENT                      | -0,034 | 0,349 | 0,0863  | 1 |
| GCM_GSPT1                              | -0,034 | 0,349 | 0,08124 | 1 |
| KEGG_REGULATION_OF_AUTOPHAGY           | -0,034 | 0,349 | 0,35098 | 1 |
| REACTOME_ASSOCIATION_OF_TRIC_CCT_WIT   | -0,034 | 0,349 | 0,56145 | 1 |
| SHEDDEN_LUNG_CANCER_GOOD_SURVIVAL_     | 0,034  | 0,349 | 0,28093 | 1 |
| ONGUSAHA_BRCA1_TARGETS_UP              | -0,034 | 0,35  | 0,4816  | 1 |
| FRASOR_TAMOXIFEN_RESPONSE_DN           | 0,034  | 0,35  | 0,03527 | 1 |
| DER_IFN_ALPHA_RESPONSE_UP              | -0,034 | 0,351 | 0,49848 | 1 |
| STARK_HYPPOCAMPUS_22Q11_DELETION_DN    | -0,034 | 0,351 | 0,27866 | 1 |
| REACTOME_GAP_JUNCTION_DEGRADATION      | -0,034 | 0,351 | 0,4627  | 1 |
| GSE339_CD8POS_VS_CD4CD8DN_DC_UP        | -0,034 | 0,352 | 0,5118  | 1 |
| EXCITATORY_EXTRACELLULAR_LIGAND_GATE   | -0,034 | 0,352 | 0,19973 | 1 |
| GSE360_T_GONDII_VS_B_MALAYI_LOW_DOS    | -0,034 | 0,352 | 0,07677 | 1 |
| GSE3337_4H_VS_16H_IFNG_IN_CD8POS_DC    | -0,034 | 0,352 | 0,18311 | 1 |
| GSE17721_PAM3CSK4_VS_GADIQUIMOD_0.5    | -0,034 | 0,352 | 0,0068  | 1 |
| RNA_DEPENDENT_ATPASE_ACTIVITY          | -0,034 | 0,352 | 0,9749  | 1 |
| GSE20715_WT_VS_TLR4_KO_LUNG_DN         | -0,034 | 0,352 | 0,00141 | 1 |
| WINNEPENNINGX_MELANOMA_METASTASIS_     | -0,034 | 0,353 | 0,01951 | 1 |
| REACTOME_TRANSCRIPTIONAL_REGULATION_   | -0,034 | 0,353 | 0,04718 | 1 |
| PID_RET_PATHWAY                        | -0,034 | 0,354 | 0,00312 | 1 |
| GCM_ATM                                | -0,034 | 0,354 | 0,12379 | 1 |
| NUCLEAR_ORGANIZATION_AND_BIOGENESIS    | -0,034 | 0,354 | 0,37694 | 1 |
| GSE9988_LOW_LPS_VS_VEHICLE_TREATED_    | -0,034 | 0,355 | 0,24489 | 1 |
| GSE1432_CTRL_VS_IFNG_24H_MICROGLIA_D   | -0,034 | 0,355 | 0,62919 | 1 |
| WEBER_METHYLATED_HCP_IN_FIBROBLAST_U   | 0,034  | 0,355 | 0,88573 | 1 |
| MODULE_60                              | -0,034 | 0,356 | 0,02033 | 1 |
| REACTOME_GENERIC_TRANSCRIPTION_PATHW   | -0,034 | 0,356 | 0,0284  | 1 |
| RODRIGUES_NTN1_TARGETS_UP              | -0,034 | 0,356 | 0,00287 | 1 |
| REACTOME_NEGATIVE_REGULATORS_OF_RIG_   | -0,034 | 0,357 | 0,39779 | 1 |
| INOSITOL_OR_PHOSPHATIDYLINOSITOL_KINAS | 0,034  | 0,357 | 0,56276 | 1 |
| PID_TCRJNKPATHWAY                      | -0,034 | 0,357 | 0,12967 | 1 |
| GSE39820_CTRL_VS_TGFBETA1_IL6_CD4_T    | -0,034 | 0,357 | 0,15455 | 1 |
| ACTIVATION_OF_MAPK_ACTIVITY            | -0,034 | 0,357 | 0,19427 | 1 |
| TARTE_PLASMA_CELL_VS_B_LYMPHOCYTE_U    | -0,034 | 0,357 | 0,95967 | 1 |
| GSE37416_CTRL_VS_6H_F_TULARENSIS_LV    | -0,034 | 0,358 | 0,28651 | 1 |
| MORI_PLASMA_CELL_UP                    | -0,034 | 0,358 | 0,90281 | 1 |
| PATTERSON_DOCETAXEL_RESISTANCE         | -0,034 | 0,359 | 0,11803 | 1 |
| REACTOME_INTERFERON_SIGNALING          | -0,034 | 0,359 | 0,57963 | 1 |
| chr6q24                                | 0,034  | 0,36  | 0,03556 | 1 |

|                                      |        |       |         |   |
|--------------------------------------|--------|-------|---------|---|
| NELSON_RESPONSE_TO_ANDROGEN_UP       | -0,034 | 0,36  | 0,04522 | 1 |
| AXON                                 | -0,034 | 0,36  | 0,00098 | 1 |
| RADAEVA_RESPONSE_TO_IFNA1_UP         | -0,034 | 0,361 | 0,4376  | 1 |
| BIOCARTA_AKT_PATHWAY                 | 0,034  | 0,361 | 0,79051 | 1 |
| REACTOME_PURINE_RIBONUCLEOSIDE_MONOP | -0,033 | 0,362 | 0,81537 | 1 |
| MORF_CASP10                          | -0,033 | 0,362 | 0,02557 | 1 |
| GSE17721_4_VS_24H_GARDIQUIMOD_BMDM   | -0,033 | 0,362 | 0,04473 | 1 |
| ST_GAQ_PATHWAY                       | 0,033  | 0,362 | 0,86422 | 1 |
| GNF2_MAP2K3                          | -0,033 | 0,362 | 0,43058 | 1 |
| LUI_THYROID_CANCER_CLUSTER_2         | 0,033  | 0,363 | 0,29614 | 1 |
| PROTEIN_DEACETYLASE_ACTIVITY         | 0,033  | 0,363 | 0,92182 | 1 |
| chr3p                                | 0,033  | 0,363 | 0,39456 | 1 |
| FUJII_YBX1_TARGETS_UP                | -0,033 | 0,364 | 0,15311 | 1 |
| GSE17721_0.5H_VS_4H_POLYIC_BMDM_DN   | -0,033 | 0,364 | 0,22707 | 1 |
| REGULATION_OF_CYTOSKELETON_ORGANIZA  | -0,033 | 0,365 | 0,00301 | 1 |
| SYED ESTRADIOL_RESPONSE              | -0,033 | 0,365 | 0,40248 | 1 |
| HUMMERICH_BENIGN_SKIN_TUMOR_UP       | -0,033 | 0,365 | 0,21415 | 1 |
| MONOSACCHARIDE_BINDING               | -0,033 | 0,366 | 0,51132 | 1 |
| MORI_PRE_BI_LYMPHOCYTE_DN            | -0,033 | 0,366 | 0,12055 | 1 |
| GSE14350_TREG_VS_TEFF_UP             | -0,033 | 0,366 | 0,05713 | 1 |
| PROTEASE_INHIBITOR_ACTIVITY          | -0,033 | 0,367 | 0,07812 | 1 |
| RGTTAMWNATT_V\$HNF1_01               | -0,033 | 0,367 | 0,01947 | 1 |
| GNF2_TST                             | 0,033  | 0,367 | 0,31638 | 1 |
| BIOCARTA_HIF_PATHWAY                 | -0,033 | 0,367 | 0,85853 | 1 |
| STK33_UP                             | -0,033 | 0,368 | 0,21139 | 1 |
| GSE37416_CTRL_VS_12H_F_TULARENSIS_L  | -0,033 | 0,368 | 0,21506 | 1 |
| BIOCARTA_FREE_PATHWAY                | -0,033 | 0,369 | 0,60984 | 1 |
| MODULE_400                           | -0,033 | 0,369 | 0,06809 | 1 |
| HYDROLASE_ACTIVITY_HYDROLYZING_O_GLY | 0,033  | 0,369 | 0,79717 | 1 |
| POTTI_DOCETAXEL_SENSITIVITY          | -0,033 | 0,369 | 0,64331 | 1 |
| REGULATION_OF_MEMBRANE_POTENTIAL     | -0,033 | 0,37  | 0,1313  | 1 |
| chr17p11                             | 0,033  | 0,371 | 0,90423 | 1 |
| MODULE_454                           | -0,033 | 0,371 | 0,00613 | 1 |
| chr22q11                             | -0,033 | 0,371 | 0,34214 | 1 |
| CLIMENT_BREAST_CANCER_COPY_NUMBER_U  | -0,033 | 0,372 | 0,00537 | 1 |
| MODULE_478                           | -0,033 | 0,372 | 0,4821  | 1 |
| BYSTROEM_CORRELATED_WITH_IL5_DN      | -0,033 | 0,373 | 0,34918 | 1 |
| REACTOME_GENERATION_OF_SECOND_MESSE  | -0,033 | 0,374 | 0,20504 | 1 |
| chr20p13                             | -0,033 | 0,374 | 0,38589 | 1 |
| chr2q                                | -0,033 | 0,374 | 0,87136 | 1 |
| YAMANAKA_GLIOMASTOMA_SURVIVAL_DN     | 0,033  | 0,374 | 0,23398 | 1 |
| REGULATION_OF_SECRETION              | -0,033 | 0,375 | 0,07678 | 1 |

|                                         |        |       |         |   |
|-----------------------------------------|--------|-------|---------|---|
| GSE27786_NKCELL_VS_NKTCELL_UP           | -0,033 | 0,375 | 0,49022 | 1 |
| GNF2_PTPRC                              | -0,033 | 0,375 | 0,28157 | 1 |
| VALK_AML_CLUSTER_5                      | 0,033  | 0,375 | 0,35878 | 1 |
| GCM_MYCL1                               | -0,033 | 0,375 | 0,05321 | 1 |
| CAIRO_LIVER_DEVELOPMENT_DN              | -0,033 | 0,376 | 0,17991 | 1 |
| MODULE_300                              | -0,032 | 0,376 | 0,62409 | 1 |
| KUROKAWA_LIVER_CANCER_CHEMOTHERAPY      | -0,032 | 0,376 | 0,00742 | 1 |
| NICOTINIC_ACETYLCHOLINE_ACTIVATED_CAT   | -0,032 | 0,376 | 0,42298 | 1 |
| NICOTINIC_ACETYLCHOLINE_GATED_RECEPTO   | -0,032 | 0,376 | 0,42298 | 1 |
| GSE36392_TYPE_2_MYELOID_VS_EOSINOPHI    | -0,032 | 0,377 | 0,36346 | 1 |
| SAKAI_CHRONIC_HEPATITIS_VS_LIVER_CANC   | -0,032 | 0,377 | 0,7383  | 1 |
| GSE17721_POLYIC_VS_PAM3CSK4_4H_BMDM     | -0,032 | 0,377 | 0,23892 | 1 |
| HOFMANN_MYELODYSPLASTIC_SYNDROM_LO      | 0,032  | 0,377 | 0,05483 | 1 |
| AGCGCTT,MIR-518F,MIR-518E,MIR-518A      | -0,032 | 0,377 | 0,03627 | 1 |
| SYNAPSE_PART                            | -0,032 | 0,377 | 0,03461 | 1 |
| POSITIVE_REGULATION_OF_DNA_BINDING      | -0,032 | 0,378 | 0,15986 | 1 |
| BRUNO_HEMATOPOIESIS                     | -0,032 | 0,379 | 0,50204 | 1 |
| GSE24142_EARLY_THYMIC_PROGENITOR_VS_    | -0,032 | 0,379 | 0,22124 | 1 |
| SA_FAS_SIGNALING                        | -0,032 | 0,379 | 0,16774 | 1 |
| GSE22886_DAY0_VS_DAY1_MONOCYTE_IN_      | -0,032 | 0,38  | 0,09369 | 1 |
| LIU_SOX4_TARGETS_UP                     | -0,032 | 0,381 | 0,43457 | 1 |
| REACTOME_INHIBITION_OF_INSULIN_SECRETIC | -0,032 | 0,381 | 0,01698 | 1 |
| MOOHTA_GLUUCONEOGENESIS                 | 0,032  | 0,381 | 0,25408 | 1 |
| GSE17721_CTRL_VS_POLYIC_1H_BMDM_UP      | -0,032 | 0,381 | 0,19632 | 1 |
| GSE14769_UNSTIM_VS_80MIN_LPS_BMDM_L     | -0,032 | 0,381 | 0,06451 | 1 |
| MITOCHONDRIAL_OUTER_MEMBRANE            | 0,032  | 0,382 | 0,44913 | 1 |
| GCM_MLL                                 | -0,032 | 0,383 | 0,1051  | 1 |
| PROTEIN_SERINE_THREONINE_PHOSPHATASE_   | 0,032  | 0,383 | 0,3105  | 1 |
| HETEROCYCLE_METABOLIC_PROCESS           | 0,032  | 0,385 | 0,07434 | 1 |
| chr4q32                                 | -0,032 | 0,386 | 0,06509 | 1 |
| PUJANA_BREAST_CANCER_WITH_BRCA1_MU      | -0,032 | 0,386 | 0,13792 | 1 |
| GSE9988_ANTI_TREM1_VS_CTRL_TREATED_     | -0,032 | 0,387 | 0,21076 | 1 |
| POSITIVE_REGULATION_OF_BINDING          | -0,032 | 0,387 | 0,19816 | 1 |
| GSE13411_IGM_VS_SWITCHED_MEMORY_BCE     | -0,032 | 0,387 | 0,42156 | 1 |
| KUROZUMI_RESPONSE_TO_ONCOCYTIC_VIRUS    | -0,032 | 0,387 | 0,58282 | 1 |
| BLOOD_COAGULATION                       | -0,032 | 0,388 | 0,00518 | 1 |
| chr5q13                                 | 0,032  | 0,388 | 0,18098 | 1 |
| NIKOLSKY_BREAST_CANCER_8Q23_Q24_AMI     | -0,032 | 0,389 | 0,56185 | 1 |
| BURTON_ADIPOGENESIS_6                   | -0,032 | 0,39  | 0,23964 | 1 |
| ITO_PTTG1_TARGETS_UP                    | -0,032 | 0,39  | 0,22143 | 1 |
| BANDRES_RESPONSE_TO_CARMUSTIN_WITHO     | -0,032 | 0,39  | 0,30253 | 1 |
| CELL_CORTEX_PART                        | 0,032  | 0,391 | 0,42429 | 1 |

|                                       |        |       |         |   |
|---------------------------------------|--------|-------|---------|---|
| KUROKAWA_LIVER_CANCER_CHEMOTHERAPY    | -0,031 | 0,391 | 0,91764 | 1 |
| GCM_FCGR2B                            | -0,031 | 0,391 | 0,00237 | 1 |
| GSE14769_40MIN_VS_360MIN_LPS_BMDM_I   | -0,031 | 0,391 | 0,16959 | 1 |
| ACCAATC,MIR-509                       | 0,031  | 0,391 | 0,75887 | 1 |
| GNF2_CD53                             | -0,031 | 0,391 | 0,45312 | 1 |
| BOSCO_INTERFERON_INDUCED_ANTIVIRAL_M  | -0,031 | 0,392 | 0,56549 | 1 |
| ELECTRON_TRANSPORT_GO_0006118         | -0,031 | 0,392 | 0,16874 | 1 |
| SAENZ_DETOX_PATHWAY_AND_CARCIINOGEN   | 0,031  | 0,392 | 0,40032 | 1 |
| NAKAJIMA_EOSINOPHIL                   | 0,031  | 0,392 | 0,97329 | 1 |
| ICHIBA_GRAFT_VERSUS_HOST_DISEASE_35D  | -0,031 | 0,393 | 0,59328 | 1 |
| MODULE_575                            | -0,031 | 0,393 | 0,12159 | 1 |
| MODULE_96                             | -0,031 | 0,393 | 0,17252 | 1 |
| WENG_POR_TARGETS_GLOBAL_UP            | 0,031  | 0,394 | 0,20029 | 1 |
| MORF_ARAF1                            | -0,031 | 0,394 | 0,10091 | 1 |
| LIPID_METABOLIC_PROCESS               | -0,031 | 0,395 | 0,04686 | 1 |
| ZHENG_FOXP3_TARGETS_UP                | -0,031 | 0,395 | 0,49372 | 1 |
| GSE17721_0.5H_VS_12H_PAM3CSK4_BMDM    | -0,031 | 0,395 | 0,67602 | 1 |
| REACTOME_GLYCOSPHINGOLIPID_METABOLISM | 0,031  | 0,395 | 0,63424 | 1 |
| GSE19825_CD24LOW_VS_IL2RA_HIGH_DAY3   | -0,031 | 0,396 | 0,05156 | 1 |
| REACTOME_SHC_RELATED_EVENTS           | -0,031 | 0,396 | 0,53644 | 1 |
| METALLOEXOPEPTIDASE_ACTIVITY          | -0,031 | 0,396 | 0,03394 | 1 |
| TRANSFERASE_ACTIVITY_TRANSFERRING_GRC | 0,031  | 0,397 | 0,77822 | 1 |
| chr11q14                              | -0,031 | 0,397 | 0,60037 | 1 |
| VISALA_RESPONSE_TO_HEAT_SHOCK_AND_U   | -0,031 | 0,397 | 0,12086 | 1 |
| MODULE_227                            | 0,031  | 0,398 | 0,18729 | 1 |
| NIELSEN_GIST_AND_SYNOVIAL_SARCOMA_DI  | -0,031 | 0,399 | 0,47691 | 1 |
| GAURNIER_PSMD4_TARGETS                | -0,031 | 0,399 | 0,71364 | 1 |
| POSITIVE_REGULATION_OF_TRANSPORT      | 0,031  | 0,399 | 0,86409 | 1 |
| chr14q12                              | 0,031  | 0,399 | 0,03519 | 1 |
| BRCHAT_RESPONSE_TO_CAMPTOTHECIN_UF    | 0,031  | 0,4   | 0,52682 | 1 |
| PROTEIN_EXPORT_FROM_NUCLEUS           | -0,031 | 0,4   | 0,68935 | 1 |
| DORSAM_HOXA9_TARGETS_DN               | 0,031  | 0,4   | 0,27394 | 1 |
| chr3q23                               | -0,031 | 0,401 | 0,63014 | 1 |
| FREDERICK_PRKCI_TARGETS               | -0,031 | 0,401 | 0,97906 | 1 |
| REACTOME_ENDOSOMAL_VACUOLAR_PATHW     | 0,031  | 0,402 | 0,16325 | 1 |
| chr9q33                               | -0,031 | 0,402 | 0,02904 | 1 |
| KEGG_RETINOL_METABOLISM               | 0,031  | 0,402 | 0,87548 | 1 |
| FARDIN_HYPOXIA_11                     | 0,031  | 0,402 | 0,23408 | 1 |
| LEF1_UP.V1_DN                         | -0,031 | 0,402 | 0,00778 | 1 |
| REACTOME_ACYL_CHAIN_REMODELLING_OF_   | 0,031  | 0,402 | 0,64508 | 1 |
| TAKEDA_TARGETS_OF_NUP98_HOXA9_FUSIC   | -0,031 | 0,402 | 0,13302 | 1 |
| GSE17974_0H_VS_4H_IN_VITRO_ACT_CD4_   | -0,031 | 0,403 | 0,01254 | 1 |

|                                      |        |       |         |   |
|--------------------------------------|--------|-------|---------|---|
| COAGULATION                          | -0,031 | 0,403 | 0,00473 | 1 |
| AEROBIC_RESPIRATION                  | -0,031 | 0,404 | 0,59517 | 1 |
| PALOMERO_GSI_SENSITIVITY_DN          | -0,031 | 0,404 | 0,77104 | 1 |
| PENG_Glutamine_Deprivation_UP        | -0,031 | 0,405 | 0,06158 | 1 |
| GSE17721_CTRL_VS_PAM3CSK4_8H_BMDM_   | -0,031 | 0,405 | 0,12969 | 1 |
| GNF2_INPP5D                          | -0,031 | 0,405 | 0,42811 | 1 |
| MASSARWEH_TAMOXIFEN_RESISTANCE_UP    | 0,031  | 0,405 | 0,86431 | 1 |
| chrp21                               | -0,031 | 0,406 | 0,82965 | 1 |
| MARTINELLI_IMMATURE_NEUTROPHIL_UP    | -0,03  | 0,406 | 0,47614 | 1 |
| NIKOLSKY_BREAST_CANCER_10Q22_AMPLIFI | -0,03  | 0,407 | 0,03402 | 1 |
| BARRIER_COLON_CANCER_RECURRENCE_UP   | -0,03  | 0,407 | 0,74357 | 1 |
| COENZYME_BIOSYNTHETIC_PROCESS        | 0,03   | 0,408 | 0,02498 | 1 |
| REACTOME_ENERGY_DEPENDENT_REGULATIO  | -0,03  | 0,409 | 0,15841 | 1 |
| MATZUK_SPERMATOZOA                   | -0,03  | 0,409 | 0,00133 | 1 |
| MEMBRANE_ORGANIZATION_AND_BIOGENESIS | -0,03  | 0,41  | 0,01848 | 1 |
| LANDIS_ERBB2_BREAST_PNEOPLASTIC_DN   | -0,03  | 0,41  | 0,08014 | 1 |
| LIU_VAV3_PROSTATE_CARCINOGENESIS_UP  | -0,03  | 0,41  | 0,17181 | 1 |
| GSE3982_DC_VS_TH2_UP                 | -0,03  | 0,41  | 0,33757 | 1 |
| REACTOME_OXYGEN_DEPENDENT_PROLINE_H  | -0,03  | 0,41  | 0,59009 | 1 |
| GAZDA_DIAMOND_BLACKFAN_ANEMIA_ERYTH  | -0,03  | 0,411 | 0,34307 | 1 |
| CELLULAR_CATABOLIC_PROCESS           | 0,03   | 0,411 | 0,56577 | 1 |
| STEROID_DEHYDROGENASE_ACTIVITY       | 0,03   | 0,411 | 0,67838 | 1 |
| MOOTHA_VOXPHOS                       | 0,03   | 0,411 | 0,37165 | 1 |
| GATGKMRGCG_UNKNOWN                   | -0,03  | 0,411 | 0,0138  | 1 |
| TERAMOTO_OPN_TARGETS_CLUSTER_8       | 0,03   | 0,412 | 0,79481 | 1 |
| ZHAN_MULTIPLE_MYELOMA_DN             | -0,03  | 0,412 | 0,64361 | 1 |
| REGULATION_OF_DNA_BINDING            | -0,03  | 0,412 | 0,14707 | 1 |
| BIOCARTA_TNFR1_PATHWAY               | -0,03  | 0,412 | 0,47196 | 1 |
| MODULE_462                           | -0,03  | 0,413 | 0,04684 | 1 |
| NIKOLSKY_BREAST_CANCER_6P24_P22_AMP  | -0,03  | 0,414 | 0,7478  | 1 |
| HEME_BIOSYNTHETIC_PROCESS            | 0,03   | 0,414 | 0,45036 | 1 |
| HUANG_GATA2_TARGETS_UP               | -0,03  | 0,415 | 0,2758  | 1 |
| ISHIKAWA_STING_SIGNALING             | -0,03  | 0,415 | 0,35641 | 1 |
| MODULE_396                           | 0,03   | 0,415 | 0,72801 | 1 |
| NEURON_PROJECTION                    | -0,03  | 0,416 | 0,0067  | 1 |
| KHETCHOUMIAN_TRIM24_TARGETS_DN       | 0,03   | 0,416 | 0,14167 | 1 |
| GSE10325_LUPUS_BCELL_VS_LUPUS_MYELO  | 0,03   | 0,416 | 0,46662 | 1 |
| chr3p22                              | 0,03   | 0,416 | 0,93891 | 1 |
| CHAPERONE_BINDING                    | -0,03  | 0,416 | 0,89675 | 1 |
| VIETOR_IFRD1_TARGETS                 | -0,03  | 0,417 | 0,2687  | 1 |
| BERENJENO_TRANSFORMED_BY_RHOA_REVEF  | -0,03  | 0,418 | 0,66975 | 1 |
| TIAN_BHLHA15_TARGETS                 | -0,03  | 0,418 | 0,09268 | 1 |

|                                       |        |       |         |   |
|---------------------------------------|--------|-------|---------|---|
| REACTOME_BOTULINUM_NEUROTOXICITY      | 0,03   | 0,418 | 0,49072 | 1 |
| BIOPOLYMER_BIOSYNTHETIC_PROCESS       | -0,03  | 0,419 | 0,07024 | 1 |
| OSAWA_TNF_TARGETS                     | -0,03  | 0,419 | 0,60681 | 1 |
| REACTOME_BILE_ACID_AND_BILE_SALT_MET  | 0,03   | 0,42  | 0,8473  | 1 |
| BIOCARTA_IL1R_PATHWAY                 | -0,03  | 0,42  | 0,41516 | 1 |
| ORGANELLE_INNER_MEMBRANE              | -0,03  | 0,421 | 0,71389 | 1 |
| GAZDA_DIAMOND_BLACKFAN_ANEMIA_MYEL    | 0,03   | 0,421 | 0,9229  | 1 |
| GSE32423_IL7_VS_IL7_IL4_NAIVE_CD8_TCE | -0,029 | 0,421 | 0,06017 | 1 |
| REACTOME_PTM_GAMMA_CARBOXYLATION_F    | -0,029 | 0,422 | 0,0713  | 1 |
| GSE29618_PDC_VS_MDC_DAY7_FLU_VACCI    | -0,029 | 0,422 | 0,38241 | 1 |
| REACTOME_TRANSCRIPTION_COUPLED_NER_1  | -0,029 | 0,422 | 0,55909 | 1 |
| chr5q15                               | 0,029  | 0,422 | 0,68217 | 1 |
| MOOHTA_MITOCHONDRIA                   | 0,029  | 0,422 | 0,58597 | 1 |
| REACTOME_COMPLEMENT_CASCADE           | 0,029  | 0,423 | 0,75581 | 1 |
| SYNAPSE                               | -0,029 | 0,424 | 0,03236 | 1 |
| REACTOME_IRON_UPTAKE_AND_TRANSPORT    | -0,029 | 0,424 | 0,89438 | 1 |
| MODULE_404                            | 0,029  | 0,425 | 0,68513 | 1 |
| DODD_NASOPHARYNGEAL_CARCINOMA_UP      | -0,029 | 0,425 | 0,00173 | 1 |
| MANN_RESPONSE_TO_AMIFOSTINE_UP        | 0,029  | 0,425 | 0,44995 | 1 |
| LINDGREN_BLADDER_CANCER_CLUSTER_2A_   | -0,029 | 0,425 | 0,21538 | 1 |
| HOEGERKORP_CD44_TARGETS_DIRECT_UP     | -0,029 | 0,425 | 0,11767 | 1 |
| MODULE_429                            | -0,029 | 0,427 | 0,33033 | 1 |
| MULLIGHAN_MLL_SIGNATURE_1_UP          | -0,029 | 0,427 | 0,31579 | 1 |
| TORCHIA_TARGETS_OF_EWSR1_FLI1_FUSION  | 0,029  | 0,428 | 0,92209 | 1 |
| TAGAACC,MIR-182                       | -0,029 | 0,428 | 0,06162 | 1 |
| REACTOME_AMINE_DERIVED_HORMONES       | -0,029 | 0,429 | 0,10162 | 1 |
| MONTERO_THYROID_CANCER_POOR_SURVIVA   | -0,029 | 0,429 | 0,11451 | 1 |
| REACTOME_ACYL_CHAIN_REMODELLING_OF_   | 0,029  | 0,43  | 0,74968 | 1 |
| LIU_LIVER_CANCER                      | 0,029  | 0,43  | 0,25406 | 1 |
| GSE24142_EARLY_THYMIC_PROGENITOR_VS_  | -0,029 | 0,43  | 0,178   | 1 |
| MODULE_209                            | -0,029 | 0,43  | 0,29458 | 1 |
| CHEN_LIVER_METABOLISM_QTL_CIS         | -0,029 | 0,431 | 0,29383 | 1 |
| CARBOHYDRATE_KINASE_ACTIVITY          | 0,029  | 0,431 | 0,0896  | 1 |
| BIOCARTA_LONGEVITY_PATHWAY            | -0,029 | 0,431 | 0,07546 | 1 |
| BIOCARTA_PROTEASOME_PATHWAY           | -0,029 | 0,431 | 0,16555 | 1 |
| KRIGE_RESPONSE_TO_TOSEDOSTAT_24HR_U   | -0,029 | 0,431 | 0,2634  | 1 |
| YU_MYC_TARGETS_DN                     | -0,029 | 0,432 | 0,17196 | 1 |
| BETA_TUBULIN_BINDING                  | -0,029 | 0,432 | 0,65942 | 1 |
| REGULATION_OF_BINDING                 | -0,029 | 0,432 | 0,09813 | 1 |
| MARIADASON_RESPONSE_TO_CURCUMIN_SUL   | 0,029  | 0,432 | 0,92394 | 1 |
| KEGG_ALZHEIMERS_DISEASE               | -0,029 | 0,432 | 0,46321 | 1 |
| ZIRN_TRETINOIN_RESPONSE_UP            | -0,029 | 0,433 | 0,0249  | 1 |

|                                              |        |       |         |   |
|----------------------------------------------|--------|-------|---------|---|
| SCHAEFFER_PROSTATE_DEVELOPMENT_AND_GCM_PTPRD | -0,029 | 0,433 | 0,00129 | 1 |
| REACTOME_PASSIVE_TRANSPORT_BY_AQUAF          | -0,029 | 0,433 | 0,93912 | 1 |
| chr14q11                                     | -0,029 | 0,433 | 0,04539 | 1 |
| COVALENT_CHROMATIN_MODIFICATION              | -0,029 | 0,434 | 0,09174 | 1 |
| CELL_MATRIX_JUNCTION                         | -0,029 | 0,435 | 0,14735 | 1 |
| KANG_FLUOROURACIL_RESISTANCE_UP              | -0,029 | 0,435 | 0,22451 | 1 |
| REACTOME_REGULATION_OF_IFNG_SIGNALING        | -0,029 | 0,436 | 0,85998 | 1 |
| WACKER_HYPOXIA_TARGETS_OF_VHL                | -0,029 | 0,436 | 0,21191 | 1 |
| VALK_AML_CLUSTER_13                          | -0,029 | 0,436 | 0,0034  | 1 |
| BUDHU_LIVER_CANCER_METASTASIS_DN             | -0,029 | 0,437 | 0,96849 | 1 |
| APOPTOTIC_NUCLEAR_CHANGES                    | -0,029 | 0,437 | 0,58596 | 1 |
| NIKOLSKY_BREAST_CANCER_11Q12_Q14_AM          | -0,029 | 0,437 | 0,26075 | 1 |
| NUCLEAR_UBIQUITIN_LIGASE_COMPLEX             | -0,028 | 0,437 | 0,58435 | 1 |
| CUI_TCF21_TARGETS_DN                         | -0,028 | 0,438 | 0,10758 | 1 |
| BIOCARTA_AHSP_PATHWAY                        | 0,028  | 0,438 | 0,69861 | 1 |
| LIU_PROSTATE_CANCER_UP                       | 0,028  | 0,438 | 0,68286 | 1 |
| MODULE_484                                   | -0,028 | 0,438 | 0,12907 | 1 |
| GENERATION_OF_A_SIGNAL_INVOLVED_IN_C         | -0,028 | 0,439 | 0,02607 | 1 |
| CALCIUM_ION_TRANSMEMBRANE_TRANSPORT          | 0,028  | 0,439 | 0,63168 | 1 |
| SCHAEFFER_SOX9_TARGETS_IN_PROSTATE_I         | -0,028 | 0,439 | 0,1225  | 1 |
| WAKABAYASHI_ADIPOGENESIS_PPARG_RXRA          | 0,028  | 0,439 | 0,57891 | 1 |
| CALCIUM_CHANNEL_ACTIVITY                     | -0,028 | 0,44  | 0,00899 | 1 |
| MODULE_349                                   | -0,028 | 0,44  | 0,44577 | 1 |
| CRGAARNNNCGA_UNKNOWN                         | -0,028 | 0,44  | 0,00885 | 1 |
| GNF2_CYP2B6                                  | 0,028  | 0,44  | 0,50648 | 1 |
| REGULATION_OF_ACTIN_POLYMERIZATION_AI        | -0,028 | 0,44  | 0,14758 | 1 |
| NADLER_OBESITY_UP                            | -0,028 | 0,441 | 0,63806 | 1 |
| GSE17721_LPS_VS_CPG_16H_BMDM_UP              | -0,028 | 0,441 | 0,08984 | 1 |
| GCM_DPF2                                     | -0,028 | 0,441 | 0,03495 | 1 |
| MORF_PPP6C                                   | -0,028 | 0,441 | 0,95802 | 1 |
| GSE29618_BCELL_VS_MDC_DAY7_FLU_VAC           | -0,028 | 0,442 | 0,4432  | 1 |
| LIAN_LIPA_TARGETS_6M                         | -0,028 | 0,442 | 0,72422 | 1 |
| KEGG_O_GLYCAN_BIOSYNTHESIS                   | -0,028 | 0,443 | 0,41273 | 1 |
| GSE13485_CTRL_VS_DAY7_YF17D_VACCINE          | -0,028 | 0,443 | 0,75787 | 1 |
| chr6q15                                      | -0,028 | 0,443 | 0,81443 | 1 |
| TIAN_TNF_SIGNALING_NOT_VIA_NFKB              | -0,028 | 0,444 | 0,01598 | 1 |
| MONOSACCHARIDE_TRANSMEMBRANE_TRANS           | -0,028 | 0,444 | 0,90111 | 1 |
| ELECTRON_CARRIER_ACTIVITY                    | -0,028 | 0,445 | 0,41696 | 1 |
| MORF_PRDX3                                   | -0,028 | 0,445 | 0,3001  | 1 |
| GCM_BMP2                                     | -0,028 | 0,446 | 0,42616 | 1 |
| PID_AR_TF_PATHWAY                            | 0,028  | 0,446 | 0,51715 | 1 |



|                                        |        |       |         |   |
|----------------------------------------|--------|-------|---------|---|
| LOPEZ_MESOTHELIOMA_SURVIVAL_UP         | -0,028 | 0,446 | 0,01702 | 1 |
| GSE36392_EOSINOPHIL_VS_MAC_IL25_TREA   | -0,028 | 0,446 | 0,06554 | 1 |
| BIOCARTA_EIF_PATHWAY                   | -0,028 | 0,447 | 0,73714 | 1 |
| KEGG_PENTOSE_AND_GLUCURONATE_INTERC    | 0,028  | 0,447 | 0,17612 | 1 |
| NEGATIVE_REGULATION_OF_TRANSLATION     | 0,028  | 0,448 | 0,97845 | 1 |
| BREDEMEYER_RAG_SIGNALING_VIA_ATM_NO1   | -0,028 | 0,448 | 0,09353 | 1 |
| GOUYER_TUMOR_INVASIVENESS              | 0,028  | 0,448 | 0,10983 | 1 |
| FLECHNER_BIOPSY_KIDNEY_TRANSPLANT_RE.  | -0,028 | 0,449 | 0,56739 | 1 |
| LATE_ENDOSOME                          | -0,028 | 0,449 | 0,36987 | 1 |
| TRANSFERASE_ACTIVITY_TRANSFERRING_ALK  | 0,028  | 0,45  | 0,78741 | 1 |
| INTERLEUKIN_8_PRODUCTION               | 0,028  | 0,45  | 0,88995 | 1 |
| GLYCOPROTEIN_BIOSYNTHETIC_PROCESS      | -0,028 | 0,45  | 0,32404 | 1 |
| WALLACE_PROSTATE_CANCER_UP             | -0,028 | 0,45  | 0,20798 | 1 |
| SILIGAN_TARGETS_OF_EWS_FLI1_FUSION_UP  | -0,028 | 0,45  | 0,83205 | 1 |
| SERINE_TYPE_ENDOPEPTIDASE_INHIBITOR_AC | -0,028 | 0,451 | 0,3499  | 1 |
| BIOCARTA_STRESS_PATHWAY                | -0,028 | 0,451 | 0,37859 | 1 |
| REACTOME_GLYCEROPHOSPHOLIPID_BIOSYNTI  | -0,028 | 0,452 | 0,00904 | 1 |
| RODRIGUES_THYROID_CARCINOMA_UP         | -0,028 | 0,452 | 0,05145 | 1 |
| chr17q21                               | -0,028 | 0,452 | 0,0159  | 1 |
| NIKOLSKY_BREAST_CANCER_7P22_AMPLICON   | -0,028 | 0,453 | 0,28739 | 1 |
| KORKOLA_SEMINOMA_DN                    | 0,028  | 0,453 | 0,44372 | 1 |
| SITE_OF_POLARIZED_GROWTH               | -0,028 | 0,453 | 0,00236 | 1 |
| BIOCARTA_PML_PATHWAY                   | -0,028 | 0,453 | 0,24557 | 1 |
| RANKIN_ANGIOGENIC_TARGETS_OF_VHL_HIF;  | 0,028  | 0,453 | 0,73671 | 1 |
| GSE9988_ANTI_TREM1_VS_ANTI_TREM1_AN    | -0,027 | 0,454 | 0,58928 | 1 |
| KEGG_HUNTINGTONS_DISEASE               | -0,027 | 0,454 | 0,36489 | 1 |
| REACTOME_LATENT_INFECTION_OF_HOMO_S    | -0,027 | 0,454 | 0,74199 | 1 |
| RPS14_DN.V1_UP                         | -0,027 | 0,455 | 0,38604 | 1 |
| MORF_PDPK1                             | -0,027 | 0,455 | 0,02352 | 1 |
| MYOSIN_COMPLEX                         | 0,027  | 0,455 | 0,25445 | 1 |
| STANHILL_HRAS_TRANSFROMATION_UP        | -0,027 | 0,455 | 0,16677 | 1 |
| PATTERN_RECOGNITION_RECEPTOR_ACTIVITY  | 0,027  | 0,456 | 0,24549 | 1 |
| GSE2197_CPG_DNA_VS_UNTREATED_IN_DC.    | -0,027 | 0,456 | 0,00497 | 1 |
| V\$EVI1_03                             | -0,027 | 0,457 | 0,01413 | 1 |
| HYDROLASE_ACTIVITY_ACTING_ON_CARBON.   | 0,027  | 0,457 | 0,07483 | 1 |
| GNF2_CDC27                             | -0,027 | 0,457 | 0,97725 | 1 |
| ELVIDGE_HYPOXIA_BY_DMOG_DN             | -0,027 | 0,458 | 0,09037 | 1 |
| DAIRKEE_TERT_TARGETS_DN                | -0,027 | 0,458 | 0,10633 | 1 |
| NEGATIVE_REGULATION_OF_BINDING         | -0,027 | 0,458 | 0,61058 | 1 |
| AMINO_ACID_AND_DERIVATIVE_METABOLIC_   | -0,027 | 0,459 | 0,05827 | 1 |
| GRANDVAUX_IFN_RESPONSE_NOT_VIA_IRF3    | -0,027 | 0,459 | 0,42627 | 1 |
| MARTINELLI_IMMATURE_NEUTROPHIL_DN      | 0,027  | 0,46  | 0,53244 | 1 |

|                                      |        |       |         |   |
|--------------------------------------|--------|-------|---------|---|
| GSE14769_UNSTIM_VS_120MIN_LPS_BMDM_  | -0,027 | 0,46  | 0,06293 | 1 |
| MYLLYKANGAS_AMPLIFICATION_HOT_SPOT_2 | 0,027  | 0,46  | 0,30583 | 1 |
| GSE17721_0.5H_VS_4H_LPS_BMDM_UP      | -0,027 | 0,46  | 0,51558 | 1 |
| GSE14769_UNSTIM_VS_60MIN_LPS_BMDM_U  | -0,027 | 0,46  | 0,1097  | 1 |
| GSE9988_ANTI_TREM1_AND_LPS_VS_VEHICI | -0,027 | 0,46  | 0,3408  | 1 |
| VESICLE_MEDIATED_TRANSPORT           | 0,027  | 0,461 | 0,25783 | 1 |
| YAMASHITA_SILENCED_BY_METHYLATION    | -0,027 | 0,462 | 0,01356 | 1 |
| GSE17721_0.5H_VS_4H_PAM3CSK4_BMDM_   | -0,027 | 0,462 | 0,06064 | 1 |
| HISTONE_DEACETYLASE_BINDING          | 0,027  | 0,462 | 0,80708 | 1 |
| chr14q13                             | 0,027  | 0,462 | 0,95414 | 1 |
| KREPPPEL_CD99_TARGETS_DN             | -0,027 | 0,463 | 0,45463 | 1 |
| REACTOME_SYNTHESIS_OF_BILE_ACIDS_AND | 0,027  | 0,463 | 0,66331 | 1 |
| GSE37416_12H_VS_48H_F_TULARENSIS_LV  | -0,027 | 0,463 | 0,43466 | 1 |
| SPHINGOLIPID_METABOLIC_PROCESS       | 0,027  | 0,464 | 0,90722 | 1 |
| GSE3982_MAC_VS_EFF_MEMORY_CD4_TCEL   | 0,027  | 0,464 | 0,27723 | 1 |
| MORF_CSNK1D                          | -0,027 | 0,465 | 0,3996  | 1 |
| GSE9988_ANTI_TREM1_VS_LPS_MONOCYTE_  | -0,027 | 0,465 | 0,35348 | 1 |
| GSE10856_CTRL_VS_TNFRSF6B_IN_MACROP  | -0,027 | 0,465 | 0,12155 | 1 |
| CHIBA_RESPONSE_TO_TSA                | 0,027  | 0,466 | 0,9426  | 1 |
| chr14q23                             | 0,027  | 0,467 | 0,55749 | 1 |
| GSE13485_CTRL_VS_DAY3_YF17D_VACCINE  | -0,027 | 0,467 | 0,7308  | 1 |
| CAR_HPX                              | -0,027 | 0,467 | 0,09431 | 1 |
| GSE15930_STIM_VS_STIM_AND_TRICHOSTAT | -0,027 | 0,467 | 0,48519 | 1 |
| DNA_FRAGMENTATION_DURING_APOPTOSIS   | -0,027 | 0,467 | 0,72222 | 1 |
| GNF2_HCK                             | 0,027  | 0,467 | 0,42401 | 1 |
| GNF2_CARD15                          | 0,027  | 0,468 | 0,4794  | 1 |
| REACTOME_KERATAN_SULFATE_DEGRADATIC  | -0,027 | 0,468 | 0,03359 | 1 |
| PID_ARF_3PATHWAY                     | -0,027 | 0,468 | 0,59168 | 1 |
| GSE11924_TFH_VS_TH1_CD4_TCELL_UP     | -0,027 | 0,469 | 0,01662 | 1 |
| NEGATIVE_REGULATION_OF_PROTEIN_METAB | -0,027 | 0,469 | 0,24992 | 1 |
| LYASE_ACTIVITY                       | 0,027  | 0,47  | 0,92047 | 1 |
| WEBER_METHYLATED_LCP_IN_FIBROBLAST_L | 0,027  | 0,47  | 0,86298 | 1 |
| AAGGGAT,MIR-188                      | -0,027 | 0,47  | 0,11735 | 1 |
| GSE29618_PDC_VS_MDC_DN               | -0,026 | 0,47  | 0,42996 | 1 |
| chrXq13                              | -0,026 | 0,47  | 0,05237 | 1 |
| NIKOLSKY_BREAST_CANCER_1Q21_AMPLICOI | 0,026  | 0,47  | 0,63796 | 1 |
| BIOCARTA_DREAM_PATHWAY               | -0,026 | 0,471 | 0,60791 | 1 |
| GSE24634_TEFF_VS_TCONV_DAY3_IN_CULT  | 0,026  | 0,471 | 0,4751  | 1 |
| MODULE_410                           | -0,026 | 0,472 | 0,18493 | 1 |
| ST_GRANULE_CELL_SURVIVAL_PATHWAY     | 0,026  | 0,472 | 0,65881 | 1 |
| GSE27786_BCELL_VS_CD8_TCELL_UP       | -0,026 | 0,472 | 0,2215  | 1 |
| NAKAYAMA_SOFT_TISSUE_TUMORS_PCA2_DI  | -0,026 | 0,473 | 0,00863 | 1 |

|                                        |        |       |         |   |
|----------------------------------------|--------|-------|---------|---|
| NEGATIVE_REGULATION_OF_CELLULAR_PROT   | -0,026 | 0,473 | 0,30431 | 1 |
| GSE22886_NAIVE_CD4_TCELL_VS_48H_ACT    | -0,026 | 0,473 | 0,00106 | 1 |
| ST_ADRENERGIC                          | 0,026  | 0,473 | 0,88759 | 1 |
| PEDERSEN_METASTASIS_BY_ERBB2_ISOFORM   | -0,026 | 0,474 | 0,00048 | 1 |
| REACTOME_NUCLEOTIDE_LIKE_PURINERGIC_RI | -0,026 | 0,475 | 0,12763 | 1 |
| KEGG_RIBOFLAVIN_METABOLISM             | 0,026  | 0,475 | 0,99699 | 1 |
| PHOSPHOLIPID_BIOSYNTHETIC_PROCESS      | -0,026 | 0,475 | 0,15119 | 1 |
| REACTOME_TRANSPORT_TO_THE_GOLGI_ANI    | -0,026 | 0,475 | 0,48264 | 1 |
| ONDER_CDH1_TARGETS_3_UP                | 0,026  | 0,475 | 0,06592 | 1 |
| GCM_CSNK1A1                            | -0,026 | 0,476 | 0,49547 | 1 |
| GNF2_STAT6                             | -0,026 | 0,476 | 0,60238 | 1 |
| MITOCHONDRIAL_INNER_MEMBRANE           | -0,026 | 0,476 | 0,74504 | 1 |
| GCM_IL6ST                              | 0,026  | 0,477 | 0,69368 | 1 |
| PROTON_TRANSPORTING_TWO_SECTOR_ATP.    | -0,026 | 0,477 | 0,8674  | 1 |
| AGGGCAG,MIR-18A                        | -0,026 | 0,477 | 0,0379  | 1 |
| GSE22886_NAIVE_BCELL_VS_DC_DN          | 0,026  | 0,477 | 0,36724 | 1 |
| RUTELLA_RESPONSE_TO_HGF_UP             | -0,026 | 0,477 | 0,84875 | 1 |
| REACTOME_SYNTHESIS_OF_PC               | -0,026 | 0,478 | 0,00985 | 1 |
| NICK_RESPONSE_TO_PROC_TREATMENT_DN     | 0,026  | 0,478 | 0,98821 | 1 |
| VESICLE_LOCALIZATION                   | 0,026  | 0,478 | 0,72567 | 1 |
| REGULATION_OF_NEURON_APOPTOSIS         | -0,026 | 0,478 | 0,17234 | 1 |
| REACTOME_INSULIN_RECEPTOR_RECYCLING    | -0,026 | 0,479 | 0,61674 | 1 |
| REN_MIF_TARGETS_DN                     | -0,026 | 0,479 | 0,23808 | 1 |
| MIZUKAMI_HYPOXIA_DN                    | -0,026 | 0,479 | 0,67158 | 1 |
| REACTOME_ELEVATION_OF_CYTOSOLIC_CA2.   | -0,026 | 0,48  | 0,35193 | 1 |
| ACTIN_FILAMENT                         | -0,026 | 0,48  | 0,35702 | 1 |
| REGULATION_OF_RHO_GTPASE_ACTIVITY      | -0,026 | 0,48  | 0,27045 | 1 |
| SHIN_B_CELL_LYMPHOMA_CLUSTER_1         | -0,026 | 0,48  | 0,77998 | 1 |
| GSE1432_1H_VS_24H_IFNG_MICROGLIA_DN    | -0,026 | 0,48  | 0,58513 | 1 |
| RASHI_RESPONSE_TO_IONIZING_RADIATION_3 | -0,026 | 0,48  | 0,00451 | 1 |
| PID_LPA4_PATHWAY                       | -0,026 | 0,481 | 0,00188 | 1 |
| REACTOME_GLOBAL_GENOMIC_NER_GG_NER     | -0,026 | 0,481 | 0,23486 | 1 |
| PIEPOLI_LGI1_TARGETS_DN                | -0,026 | 0,482 | 0,20853 | 1 |
| WENG_POR_TARGETS_LIVER_UP              | 0,026  | 0,482 | 0,85736 | 1 |
| MAHAJAN_RESPONSE_TO_IL1A_DN            | -0,026 | 0,483 | 0,34901 | 1 |
| POST_GOLGI_VESICLE_MEDIATED_TRANSPOR   | 0,026  | 0,485 | 0,59483 | 1 |
| CASTELLANO_HRAS_TARGETS_UP             | 0,026  | 0,485 | 0,31301 | 1 |
| DUTTA_APOPTOSIS_VIA_NFKB               | -0,026 | 0,485 | 0,59182 | 1 |
| ZEMBUTSU_SENSITIVITY_TO_FLUOROURACIL   | -0,026 | 0,485 | 0,65781 | 1 |
| REACTOME_GLUCURONIDATION               | 0,026  | 0,487 | 0,1502  | 1 |
| MUELLER_COMMON_TARGETS_OF_AML_FUSIC    | -0,025 | 0,487 | 0,56892 | 1 |
| MODULE_40                              | 0,025  | 0,488 | 0,47319 | 1 |

|                                       |        |       |         |   |
|---------------------------------------|--------|-------|---------|---|
| DARWICHE_PAPILLOMA_RISK_HIGH_VS_LOW_  | -0,025 | 0,488 | 0,6084  | 1 |
| chr3q26                               | -0,025 | 0,488 | 0,46867 | 1 |
| KUROZUMI_RESPONSE_TO_ONCOCYTIC_VIRUS  | -0,025 | 0,489 | 0,57753 | 1 |
| chrxp22                               | -0,025 | 0,489 | 0,98018 | 1 |
| MORF_PSMC2                            | -0,025 | 0,489 | 0,30755 | 1 |
| GSE17721_LPS_VS_CPG_24H_BMDM_UP       | -0,025 | 0,489 | 0,30224 | 1 |
| CHOI_ATL_ACUTE_STAGE                  | -0,025 | 0,489 | 0,54119 | 1 |
| MEMBRANE_LIPID_METABOLIC_PROCESS      | -0,025 | 0,489 | 0,15888 | 1 |
| REACTOME_VIRAL_MESSENGER_RNA_SYNTHE   | -0,025 | 0,49  | 0,83117 | 1 |
| MODULE_23                             | -0,025 | 0,49  | 0,04038 | 1 |
| CHNG_MULTIPLE_MYELOMA_HYPERPLOID_DN   | 0,025  | 0,49  | 0,05965 | 1 |
| GUTIERREZ_WALDENSTROEMS_MACROGLOBUL   | -0,025 | 0,491 | 0,08346 | 1 |
| KEGG_ABC_TRANSPORTERS                 | -0,025 | 0,491 | 0,00945 | 1 |
| REGULATION_OF_BODY_FLUID_LEVELS       | -0,025 | 0,492 | 0,00859 | 1 |
| V\$HTF_01                             | -0,025 | 0,492 | 0,34532 | 1 |
| MIKKELSEN_MCV6_LCP_WITH_H3K27ME3      | -0,025 | 0,492 | 0,32884 | 1 |
| WATANABE_ULCERATIVE_COLITIS_WITH_CAN  | -0,025 | 0,492 | 0,53455 | 1 |
| MODULE_360                            | -0,025 | 0,493 | 0,29054 | 1 |
| ROSS_ACUTE_MYELOID_LEUKEMIA_CBF       | -0,025 | 0,493 | 0,02681 | 1 |
| GNF2_ICAM3                            | -0,025 | 0,493 | 0,33351 | 1 |
| MODULE_430                            | -0,025 | 0,493 | 0,21507 | 1 |
| REACTOME_CIRCADIAN_REPRESSION_OF_EXPI | -0,025 | 0,493 | 0,62236 | 1 |
| GSE2706_2H_VS_8H_LPS_STIM_DC_UP       | -0,025 | 0,493 | 0,00716 | 1 |
| CAIRO_HEPATOBLASTOMA_DN               | -0,025 | 0,495 | 0,01798 | 1 |
| SU_SALIVARY_GLAND                     | -0,025 | 0,495 | 0,76078 | 1 |
| RESPONSE_TO_HORMONE_STIMULUS          | 0,025  | 0,496 | 0,28036 | 1 |
| MEMBRANE_FUSION                       | 0,025  | 0,496 | 0,40011 | 1 |
| LENAOUR_DENDRITIC_CELL_MATURATION_DN  | -0,025 | 0,496 | 0,87813 | 1 |
| CELL_PROJECTION_PART                  | -0,025 | 0,497 | 0,02641 | 1 |
| chryp11                               | -0,025 | 0,497 | 0,8459  | 1 |
| GSE17721_12H_VS_24H_LPS_BMDM_DN       | -0,025 | 0,497 | 0,48654 | 1 |
| MORF_ERCC2                            | -0,025 | 0,497 | 0,04303 | 1 |
| CHANG_CORE_SERUM_RESPONSE_DN          | -0,025 | 0,497 | 0,02038 | 1 |
| HERNANDEZ_ABERRANT_MITOSIS_BY_DOCET,  | -0,025 | 0,498 | 0,52742 | 1 |
| REACTOME_ORGANIC_CATION_ANION_ZWITTI  | 0,025  | 0,498 | 0,76369 | 1 |
| RAMJAUN_APOPTOSIS_BY_TGFB1_VIA_SMAD   | -0,025 | 0,499 | 0,44926 | 1 |
| NIKOLSKY_BREAST_CANCER_17P11_AMPLICC  | -0,025 | 0,499 | 0,08145 | 1 |
| RUAN_RESPONSE_TO_TROGLITAZONE_DN      | -0,025 | 0,5   | 0,12091 | 1 |
| REACTOME_RESPIRATORY_ELECTRON_TRANSI  | 0,025  | 0,501 | 0,34094 | 1 |
| BIOCARTA_AGPCR_PATHWAY                | -0,025 | 0,502 | 0,70788 | 1 |
| REACTOME_RESPIRATORY_ELECTRON_TRANSI  | 0,025  | 0,502 | 0,3483  | 1 |
| L_AMINO_ACID_TRANSMEMBRANE_TRANSPOF   | -0,025 | 0,502 | 0,83341 | 1 |

|                                       |        |       |         |   |
|---------------------------------------|--------|-------|---------|---|
| HISTONE_ACETYLTRANSFERASE_ACTIVITY    | 0,025  | 0,502 | 0,33622 | 1 |
| MODULE_130                            | 0,025  | 0,503 | 0,97433 | 1 |
| ENDONUCLEASE_ACTIVITY                 | -0,025 | 0,503 | 0,39264 | 1 |
| MODULE_273                            | -0,025 | 0,503 | 0,79915 | 1 |
| MORF_RAB5A                            | 0,025  | 0,504 | 0,05437 | 1 |
| COATES_MACROPHAGE_M1_VS_M2_UP         | -0,025 | 0,504 | 0,15473 | 1 |
| PETRETTO_LEFT_VENTRICLE_MASS_QTL_CIS  | -0,025 | 0,504 | 0,38711 | 1 |
| GNF2_TNFSF10                          | 0,024  | 0,505 | 0,5135  | 1 |
| TRANSFERASE_ACTIVITY_TRANSFERRING_ACY | -0,024 | 0,505 | 0,1653  | 1 |
| CELLULAR_PROTEIN_CATABOLIC_PROCESS    | -0,024 | 0,505 | 0,73788 | 1 |
| LOW_DENSITY_LIPOPROTEIN_BINDING       | 0,024  | 0,505 | 0,94326 | 1 |
| GSE17721_LPS_VS_POLYIC_8H_BMDM_DN     | -0,024 | 0,506 | 0,25717 | 1 |
| chr14q31                              | 0,024  | 0,506 | 0,47448 | 1 |
| HASEGAWA_TUMORIGENESIS_BY_RET_C634R   | -0,024 | 0,507 | 0,66559 | 1 |
| GGTGTGT,MIR-329                       | -0,024 | 0,507 | 0,08382 | 1 |
| chr4q24                               | -0,024 | 0,507 | 0,34256 | 1 |
| GSE16522_MEMORY_VS_NAIVE_CD8_TCELL    | -0,024 | 0,507 | 0,15794 | 1 |
| GUO_HEX_TARGETS_DN                    | -0,024 | 0,507 | 0,05713 | 1 |
| BIOCARTA_P35ALZHEIMERS_PATHWAY        | 0,024  | 0,508 | 0,81799 | 1 |
| CREIGHTON_AKT1_SIGNALING_VIA_MTOR_DN  | 0,024  | 0,508 | 0,48488 | 1 |
| REACTOME_PHOSPHORYLATION_OF_CD3_ANI   | -0,024 | 0,508 | 0,38189 | 1 |
| GSE9006_TYPE_1_VS_TYPE_2_DIABETES_PE  | -0,024 | 0,508 | 0,69301 | 1 |
| GSE1432_6H_VS_24H_IFNG_MICROGLIA_DN   | -0,024 | 0,509 | 0,51043 | 1 |
| ACTIN_FILAMENT_BINDING                | -0,024 | 0,509 | 0,235   | 1 |
| YAO_TEMPORAL_RESPONSE_TO_PROGESTERC   | -0,024 | 0,509 | 0,68064 | 1 |
| PROTEIN_PHOSPHATASE_BINDING           | 0,024  | 0,509 | 0,27666 | 1 |
| GSE22886_DAY1_VS_DAY7_MONOCYTE_IN     | -0,024 | 0,51  | 0,93541 | 1 |
| RNA_ELONGATION                        | -0,024 | 0,51  | 0,87206 | 1 |
| STEARMAN_TUMOR_FIELD_EFFECT_UP        | 0,024  | 0,51  | 0,564   | 1 |
| chr4q28                               | -0,024 | 0,51  | 0,16584 | 1 |
| PID_HIF1APATHWAY                      | -0,024 | 0,51  | 0,87729 | 1 |
| GOLUB_ALL_VS_AML_DN                   | 0,024  | 0,51  | 0,72481 | 1 |
| chr5q22                               | 0,024  | 0,511 | 0,35498 | 1 |
| REACTOME_FORMATION_OF_ATP_BY_CHEMIC   | -0,024 | 0,511 | 0,90821 | 1 |
| KIM_LRRC3B_TARGETS                    | -0,024 | 0,512 | 0,83693 | 1 |
| chr22q                                | -0,024 | 0,512 | 0,95255 | 1 |
| MORF_HEAB                             | -0,024 | 0,513 | 0,00599 | 1 |
| WANG_TNF_TARGETS                      | -0,024 | 0,513 | 0,32404 | 1 |
| MOOTHA_TCA                            | -0,024 | 0,514 | 0,40392 | 1 |
| NIELSEN_LIPOSARCOMA_UP                | -0,024 | 0,514 | 0,09602 | 1 |
| REACTOME_CYTOCHROME_P450_ARRANGED     | -0,024 | 0,515 | 0,03223 | 1 |
| PID_P38GAMMADELTA_PATHWAY             | 0,024  | 0,515 | 0,24508 | 1 |

|                                       |        |       |         |   |
|---------------------------------------|--------|-------|---------|---|
| GSE24634_IL4_VS_CTRL_TREATED_NAIVE_C  | -0,024 | 0,515 | 0,55473 | 1 |
| REACTOME_TRANSLOCATION_OF_ZAP_70_T    | -0,024 | 0,515 | 0,33621 | 1 |
| GUTIERREZ_MULTIPLE_MYELOMA_DN         | 0,024  | 0,516 | 0,28586 | 1 |
| chr10q25                              | 0,024  | 0,517 | 0,1198  | 1 |
| GSE29615_CTRL_VS_DAY3_LAIV_IFLU_VAC   | -0,024 | 0,517 | 0,09773 | 1 |
| MODULE_323                            | -0,024 | 0,517 | 0,86945 | 1 |
| GSE9988_LPS_VS_VEHICLE_TREATED_MONO   | -0,024 | 0,517 | 0,30319 | 1 |
| GSE12845_IGD_NEG_BLOOD_VS_DARKZONE    | -0,024 | 0,518 | 0,3897  | 1 |
| MORF_RAC1                             | -0,024 | 0,518 | 0,24324 | 1 |
| YAN_ESCAPE_FROM_ANOIKIS               | -0,024 | 0,518 | 0,8385  | 1 |
| REACTOME_NEUROTRANSMITTER_RELEASE_C   | -0,024 | 0,519 | 0,03569 | 1 |
| TSAI_DNAJB4_TARGETS_UP                | 0,024  | 0,52  | 0,88111 | 1 |
| GSE11864_CSF1_IFNG_VS_CSF1_IFNG_PAM3  | -0,024 | 0,52  | 0,24315 | 1 |
| GARGALOVIC_RESPONSE_TO_OXIDIZED_PHOS  | 0,024  | 0,52  | 0,8382  | 1 |
| BIDUS_METASTASIS_DN                   | 0,024  | 0,52  | 0,37361 | 1 |
| NAKAMURA_BRONCHIAL_AND_BRONCHIOLAR    | 0,024  | 0,52  | 0,38492 | 1 |
| GSE11864_CSF1_VS_CSF1_IFNG_PAM3CYS_   | 0,024  | 0,521 | 0,34217 | 1 |
| KAMIKUBO_MYELOID_MN1_NETWORK          | 0,024  | 0,521 | 0,82656 | 1 |
| KEGG_NOD_LIKE_RECEPTOR_SIGNALING_PATI | -0,024 | 0,522 | 0,9488  | 1 |
| GLYCEROPHOSPHOLIPID_BIOSYNTHETIC_PROC | 0,023  | 0,522 | 0,85252 | 1 |
| GCM_NF2                               | -0,023 | 0,522 | 0,13513 | 1 |
| MYLLYKANGAS_AMPLIFICATION_HOT_SPOT_1  | 0,023  | 0,522 | 0,82666 | 1 |
| SMALL_PROTEIN_CONJUGATING_ENZYME_AC   | -0,023 | 0,523 | 0,33994 | 1 |
| REACTOME_ENDOSOMAL_SORTING_COMPLEX    | 0,023  | 0,523 | 0,80557 | 1 |
| MANNOSYLTRANSFERASE_ACTIVITY          | 0,023  | 0,524 | 0,50999 | 1 |
| ODONNELL_TARGETS_OF_MYC_AND_TFRC_U    | -0,023 | 0,524 | 0,12213 | 1 |
| RIBONUCLEOTIDE_METABOLIC_PROCESS      | 0,023  | 0,525 | 0,18468 | 1 |
| WUNDER_INFLAMMATORY_RESPONSE_AND_C    | -0,023 | 0,525 | 0,66479 | 1 |
| GOZGIT_ESR1_TARGETS_DN                | -0,023 | 0,525 | 0,00021 | 1 |
| MATZUK_STEROIDOGENESIS                | -0,023 | 0,526 | 0,14721 | 1 |
| DAUER_STAT3_TARGETS_DN                | -0,023 | 0,526 | 0,58718 | 1 |
| MORI_LARGE_PRE_BII_LYMPHOCYTE_DN      | -0,023 | 0,526 | 0,39531 | 1 |
| GUTIERREZ_WALDENSTROEMS_MACROGLOBUL   | -0,023 | 0,526 | 0,03939 | 1 |
| MAINA_VHL_TARGETS_DN                  | -0,023 | 0,526 | 0,5737  | 1 |
| MODULE_311                            | -0,023 | 0,528 | 0,65116 | 1 |
| BAELDE_DIABETIC_NEPHROPATHY_UP        | -0,023 | 0,529 | 0,09207 | 1 |
| VOLTAGE_GATED_CALCIIUM_CHANNEL_COMP   | 0,023  | 0,529 | 0,07146 | 1 |
| WEBER_METHYLATED_HCP_IN_SPERM_DN      | -0,023 | 0,529 | 0,30816 | 1 |
| REACTOME_PD1_SIGNALING                | -0,023 | 0,529 | 0,43706 | 1 |
| GARGALOVIC_RESPONSE_TO_OXIDIZED_PHOS  | -0,023 | 0,53  | 0,01022 | 1 |
| MODULE_103                            | 0,023  | 0,53  | 0,61191 | 1 |
| BYSTRYKH_SCP2_QTL                     | 0,023  | 0,531 | 0,1017  | 1 |

|                                       |        |       |         |   |
|---------------------------------------|--------|-------|---------|---|
| OXIDOREDUCTASE_ACTIVITY               | -0,023 | 0,531 | 0,41575 | 1 |
| COENZYME_BINDING                      | -0,023 | 0,532 | 0,14119 | 1 |
| KEGG_N_GLYCAN_BIOSYNTHESIS            | -0,023 | 0,532 | 0,95669 | 1 |
| KEGG_GRAFT_VERSUS_HOST_DISEASE        | -0,023 | 0,532 | 0,76858 | 1 |
| MOOHTA_PYR                            | 0,023  | 0,532 | 0,26422 | 1 |
| GSE17721_CTRL_VS_PAM3CSK4_12H_BMDM    | -0,023 | 0,533 | 0,14039 | 1 |
| ZHAN_VARIABLE_EARLY_DIFFERENTIATION_G | -0,023 | 0,533 | 0,31787 | 1 |
| chr4q25                               | -0,023 | 0,534 | 0,09392 | 1 |
| WIELAND_UP_BY_HBV_INFECTION           | -0,023 | 0,534 | 0,76731 | 1 |
| HOWLIN_CITED1_TARGETS_2_DN            | -0,023 | 0,534 | 0,09178 | 1 |
| AIYAR_COBRA1_TARGETS_DN               | 0,023  | 0,535 | 0,71053 | 1 |
| GSE10325_LUPUS_CD4_TCELL_VS_LUPUS_M   | 0,023  | 0,535 | 0,41722 | 1 |
| GNF2_MYD88                            | -0,023 | 0,536 | 0,65477 | 1 |
| NUCLEOTIDE_SUGAR_METABOLIC_PROCESS    | -0,023 | 0,536 | 0,71761 | 1 |
| PELLICCIOTTA_HDAC_IN_ANTIGEN_PRESENTA | -0,023 | 0,536 | 0,37922 | 1 |
| GCM_UBE2N                             | -0,023 | 0,536 | 0,28584 | 1 |
| GSE36476_YOUNG_VS_OLD_DONOR_MEMOR     | -0,023 | 0,537 | 0,03843 | 1 |
| REACTOME_CASPASE_MEDIATED_CLEAVAGE_   | -0,023 | 0,537 | 0,00219 | 1 |
| DETECTION_OF_EXTERNAL_STIMULUS        | -0,023 | 0,538 | 0,00594 | 1 |
| REACTOME_TRAF6_MEDIATED_IRF7_ACTIVAT  | -0,023 | 0,538 | 0,93801 | 1 |
| REGULATION_OF_CELLULAR_COMPONENT_SIZ  | -0,023 | 0,539 | 0,11255 | 1 |
| REGULATION_OF_ACTIN_FILAMENT_LENGTH   | -0,023 | 0,54  | 0,11601 | 1 |
| GREENBAUM_E2A_TARGETS_DN              | -0,022 | 0,541 | 0,25046 | 1 |
| REACTOME_ADENYLATE_CYCLASE_ACTIVATII  | -0,022 | 0,541 | 0,00179 | 1 |
| ABBUD_LIF_SIGNALING_1_DN              | -0,022 | 0,541 | 0,2232  | 1 |
| MORF_MBD4                             | -0,022 | 0,542 | 0,30954 | 1 |
| REACTOME_ETHANOL_OXIDATION            | -0,022 | 0,543 | 0,02943 | 1 |
| PROTEIN_MATURATION                    | 0,022  | 0,543 | 0,93866 | 1 |
| NIKOLSKY_BREAST_CANCER_19Q13.4_AMPLI  | 0,022  | 0,544 | 0,71111 | 1 |
| REACTOME_ERK_MAPK_TARGETS             | 0,022  | 0,544 | 0,50269 | 1 |
| MORF_RAD23B                           | -0,022 | 0,544 | 0,285   | 1 |
| chr19p13                              | -0,022 | 0,544 | 0,0914  | 1 |
| MODULE_293                            | 0,022  | 0,545 | 0,43509 | 1 |
| REACTOME_EICOSANOID_LIGAND_BINDING_RE | -0,022 | 0,545 | 0,05646 | 1 |
| KASLER_HDAC7_TARGETS_2_DN             | 0,022  | 0,546 | 0,016   | 1 |
| GSE22886_NAIVE_TCELL_VS_MONOCYTE_DN   | 0,022  | 0,547 | 0,44394 | 1 |
| MODULE_350                            | -0,022 | 0,547 | 0,30898 | 1 |
| KANG_CISPLATIN_RESISTANCE_UP          | -0,022 | 0,548 | 0,39168 | 1 |
| GLYCOPROTEIN_METABOLIC_PROCESS        | -0,022 | 0,548 | 0,41001 | 1 |
| CHIANG_LIVER_CANCER_SUBCLASS_UNANNO   | -0,022 | 0,548 | 0,11543 | 1 |
| GLYCOSPHINGOLIPID_METABOLIC_PROCESS   | -0,022 | 0,548 | 0,21861 | 1 |
| PROTEIN_TARGETING_TO_MEMBRANE         | -0,022 | 0,549 | 0,24795 | 1 |

|                                       |        |       |         |   |
|---------------------------------------|--------|-------|---------|---|
| MODULE_141                            | -0,022 | 0,549 | 0,11682 | 1 |
| GSE22886_NAIVE_TCELL_VS_DC_DN         | 0,022  | 0,55  | 0,48143 | 1 |
| PURINE_NUCLEOTIDE_METABOLIC_PROCESS   | 0,022  | 0,55  | 0,43138 | 1 |
| WEST_ADRENOCORTICAL_CARCINOMA_VS_AI   | -0,022 | 0,55  | 0,15483 | 1 |
| chr5p15                               | -0,022 | 0,552 | 0,05223 | 1 |
| GSE22886_NAIVE_CD8_TCELL_VS_DC_DN     | 0,022  | 0,554 | 0,38585 | 1 |
| MCGOWAN_RSP6_TARGETS_DN               | 0,022  | 0,555 | 0,10373 | 1 |
| PID_AVB3_OPN_PATHWAY                  | -0,022 | 0,556 | 0,46216 | 1 |
| REGULATION_OF_PROTEIN_POLYMERIZATION  | 0,022  | 0,556 | 0,2392  | 1 |
| ACTIVATION_OF_NF_KAPPAB_TRANSCRIPTIOI | -0,022 | 0,557 | 0,29879 | 1 |
| PROTEIN_TARGETING_TO_MITOCHONDRION    | -0,022 | 0,557 | 0,568   | 1 |
| CHIANG_LIVER_CANCER_SUBCLASS_INTERFEF | -0,022 | 0,557 | 0,49229 | 1 |
| VANTVEER_BREAST_CANCER_BRCA1_DN       | 0,022  | 0,557 | 0,02682 | 1 |
| WEBER_METHYLATED_HCP_IN_SPERM_UP      | -0,022 | 0,557 | 0,20638 | 1 |
| PYRIMIDINE_NUCLEOTIDE_METABOLIC_PROCE | 0,022  | 0,557 | 0,68094 | 1 |
| WEBER_METHYLATED_ICP_IN_SPERM_UP      | 0,021  | 0,558 | 0,13931 | 1 |
| MODULE_470                            | -0,021 | 0,558 | 0,02237 | 1 |
| CELL_CORTEX                           | 0,021  | 0,559 | 0,82208 | 1 |
| GSE2706_UNSTIM_VS_2H_R848_DC_UP       | -0,021 | 0,559 | 0,00175 | 1 |
| MODULE_432                            | 0,021  | 0,559 | 0,26689 | 1 |
| RAS_GUANYL_NUCLEOTIDE_EXCHANGE_FACT   | -0,021 | 0,56  | 0,0256  | 1 |
| DEACETYLASE_ACTIVITY                  | 0,021  | 0,56  | 0,82854 | 1 |
| GARGALOVIC_RESPONSE_TO_OXIDIZED_PHOS  | -0,021 | 0,561 | 0,02192 | 1 |
| REACTOME_HYALURONAN_UPTAKE_AND_DEC    | -0,021 | 0,561 | 0,32786 | 1 |
| KEGG_TOLL_LIKE_RECEPTOR_SIGNALING_PA1 | -0,021 | 0,561 | 0,97648 | 1 |
| GSE15767_MED_VS_SCS_MAC_LN_UP         | -0,021 | 0,561 | 0,22217 | 1 |
| KEGG_HISTIDINE_METABOLISM             | 0,021  | 0,561 | 0,96057 | 1 |
| CARBOHYDRATE_TRANSMEMBRANE_TRANSPC    | 0,021  | 0,562 | 0,07027 | 1 |
| chr1q44                               | -0,021 | 0,562 | 0,10897 | 1 |
| chr14q24                              | -0,021 | 0,562 | 0,06428 | 1 |
| RUTELLA_RESPONSE_TO_CSF2RB_AND_IL4_I  | -0,021 | 0,563 | 0,51456 | 1 |
| BOYALT_LIVER_CANCER_SUBCLASS_G12_D    | -0,021 | 0,563 | 0,05969 | 1 |
| MODULE_59                             | 0,021  | 0,563 | 0,31595 | 1 |
| RESPONSE_TO_XENOBIOTIC_STIMULUS       | 0,021  | 0,563 | 0,65813 | 1 |
| BONOME_OVARIAN_CANCER_POOR_SURVIVAL   | -0,021 | 0,563 | 0,04807 | 1 |
| GSE13485_DAY1_VS_DAY7_YF17D_VACCINI   | -0,021 | 0,563 | 0,96658 | 1 |
| REACTOME_ASPARAGINE_N_LINKED_GLYCOS   | -0,021 | 0,563 | 0,97648 | 1 |
| GSE3982_MAC_VS_CENT_MEMORY_CD4_TCE    | -0,021 | 0,564 | 0,83736 | 1 |
| RESPONSE_TO_CARBOHYDRATE_STIMULUS     | -0,021 | 0,564 | 0,48863 | 1 |
| WANG_THOC1_TARGETS_UP                 | 0,021  | 0,565 | 0,07856 | 1 |
| STK33_NOMO_UP                         | -0,021 | 0,565 | 0,43407 | 1 |
| COENZYME_METABOLIC_PROCESS            | -0,021 | 0,565 | 0,52959 | 1 |



|                                        |        |       |         |   |
|----------------------------------------|--------|-------|---------|---|
| REACTOME_DOPAMINE_NEUROTRANSMITTER_    | -0,021 | 0,565 | 0,02965 | 1 |
| PID_IL1PATHWAY                         | -0,021 | 0,567 | 0,85997 | 1 |
| ACEVEDO_LIVER_CANCER_DN                | -0,021 | 0,567 | 0,02057 | 1 |
| CHIANG_LIVER_CANCER_SUBCLASS_POLYSON   | -0,021 | 0,567 | 0,06339 | 1 |
| ZHANG_INTERFERON_RESPONSE              | -0,021 | 0,568 | 0,86019 | 1 |
| GSE10325_MYELOID_VS_LUPUS_MYELOID_DI   | -0,021 | 0,569 | 0,85629 | 1 |
| LI_ADIPOGENESIS_BY_ACTIVATED_PPARG     | 0,021  | 0,57  | 0,30549 | 1 |
| ZIRN_TRETINOIN_RESPONSE_DN             | -0,021 | 0,57  | 0,20435 | 1 |
| ICHIBA_GRAFT_VERSUS_HOST_DISEASE_D7_I  | -0,021 | 0,573 | 0,67182 | 1 |
| REGULATION_OF_ENDOTHELIAL_CELL_PROLIF  | 0,021  | 0,573 | 0,65875 | 1 |
| MORF_RAB6A                             | -0,021 | 0,573 | 0,3943  | 1 |
| NIKOLSKY_BREAST_CANCER_8P12_P11_AMP    | -0,021 | 0,574 | 0,40413 | 1 |
| INOSITOL_OR_PHOSPHATIDYLINOSITOL_PHOS  | -0,021 | 0,574 | 0,34063 | 1 |
| GNF2_VAV1                              | -0,021 | 0,574 | 0,60492 | 1 |
| MODULE_20                              | -0,021 | 0,575 | 0,38555 | 1 |
| AMINE_TRANSPORT                        | 0,021  | 0,575 | 0,52784 | 1 |
| CATABOLIC_PROCESS                      | 0,021  | 0,576 | 0,79579 | 1 |
| POSITIVE_REGULATION_OF_TRANSCRIPTION_I | -0,021 | 0,576 | 0,27092 | 1 |
| VALK_AML_WITH_EVI1                     | -0,021 | 0,576 | 0,00323 | 1 |
| CHANGOLKAR_H2AFY_TARGETS_DN            | -0,02  | 0,577 | 0,20661 | 1 |
| HISTONE_DEACETYLASE_COMPLEX            | 0,02   | 0,578 | 0,58365 | 1 |
| WAKABAYASHI_ADIPOGENESIS_PPARG_BOUNI   | 0,02   | 0,578 | 0,3793  | 1 |
| KOBAYASHI_EGFR_SIGNALING_24HR_UP       | 0,02   | 0,579 | 0,63597 | 1 |
| WANG_CLASSIC_ADIPOGENIC_TARGETS_OF_F   | 0,02   | 0,579 | 0,57923 | 1 |
| MAGRANGEAS_MULTIPLE_MYELOMA_IGG_VS_    | -0,02  | 0,579 | 0,01007 | 1 |
| GSE22886_IGM_MEMORY_BCELL_VS_BM_PLA    | 0,02   | 0,58  | 0,78873 | 1 |
| GARGALOVIC_RESPONSE_TO_OXIDIZED_PHOS   | 0,02   | 0,58  | 0,58138 | 1 |
| POSITIVE_REGULATION_OF_I_KAPPAB_KINASI | -0,02  | 0,581 | 0,43345 | 1 |
| GSE11057_PBMC_VS_MEM_CD4_TCELL_UP      | -0,02  | 0,581 | 0,62868 | 1 |
| GSE27786_LIN_NEG_VS_NKTCELL_DN         | -0,02  | 0,581 | 0,02266 | 1 |
| VILIMAS_NOTCH1_TARGETS_DN              | -0,02  | 0,581 | 0,13808 | 1 |
| NUCLEOTIDE_EXCISION_REPAIR             | 0,02   | 0,582 | 0,67527 | 1 |
| ST_MYOCYTE_AD_PATHWAY                  | -0,02  | 0,582 | 0,08457 | 1 |
| ESC_J1_UP_EARLY.V1_UP                  | -0,02  | 0,582 | 0,00169 | 1 |
| XENOBIOTIC_METABOLIC_PROCESS           | 0,02   | 0,582 | 0,64646 | 1 |
| MODULE_235                             | -0,02  | 0,583 | 0,98517 | 1 |
| LUI_THYROID_CANCER_PAX8_PPARG_DN       | -0,02  | 0,583 | 0,66558 | 1 |
| TRANSCRIPTION_FROM_RNA_POLYMERASE_III  | -0,02  | 0,584 | 0,33772 | 1 |
| REACTOME_SYNTHESIS_OF_PIPS_AT_THE_PL   | -0,02  | 0,584 | 0,14211 | 1 |
| DI____TRI_VALENT_INORGANIC_CATION_TRAN | 0,02   | 0,584 | 0,64648 | 1 |
| GSE17721_0.5H_VS_4H_CPG_BMDM_UP        | 0,02   | 0,585 | 0,79431 | 1 |
| AROMATIC_COMPOUND_METABOLIC_PROCESS    | 0,02   | 0,585 | 0,66951 | 1 |

|                                      |        |       |         |   |
|--------------------------------------|--------|-------|---------|---|
| WANG_THOC1_TARGETS_DN                | -0,02  | 0,585 | 0,55824 | 1 |
| GSE22886_TH1_VS_TH2_48H_ACT_DN       | -0,02  | 0,586 | 0,34199 | 1 |
| KRISHNAN_FURIN_TARGETS_UP            | -0,02  | 0,586 | 0,45789 | 1 |
| BRUNEAU_SEPTATION_VENTRICULAR        | -0,02  | 0,586 | 0,85887 | 1 |
| KUMAMOTO_RESPONSE_TO_NUTLIN_3A_UP    | 0,02   | 0,587 | 0,05592 | 1 |
| chr12q24                             | -0,02  | 0,587 | 0,29978 | 1 |
| LYSOSOME                             | 0,02   | 0,587 | 0,76306 | 1 |
| LYTIC_VACUOLE                        | 0,02   | 0,587 | 0,76306 | 1 |
| chr6q13                              | -0,02  | 0,587 | 0,78792 | 1 |
| REACTOME_SYNTHESIS_OF_PIPS_AT_THE_LA | -0,02  | 0,587 | 0,97118 | 1 |
| MOTAMED_RESPONSE_TO_ANDROGEN_UP      | 0,02   | 0,587 | 0,32699 | 1 |
| chr11q13                             | -0,02  | 0,588 | 0,39962 | 1 |
| WELCH_GATA1_TARGETS                  | -0,02  | 0,588 | 0,28538 | 1 |
| SMID_BREAST_CANCER_RELAPSE_IN_PLEURA | -0,02  | 0,589 | 0,00276 | 1 |
| BIOCARTA_GSK3_PATHWAY                | -0,02  | 0,591 | 0,70096 | 1 |
| VALK_AML_CLUSTER_8                   | -0,02  | 0,591 | 0,32461 | 1 |
| GNF2_CD14                            | 0,02   | 0,592 | 0,60787 | 1 |
| REACTOME_SYNTHESIS_SECRETION_AND_DEA | 0,02   | 0,593 | 0,77685 | 1 |
| REACTOME_PPARA_ACTIVATES_GENE_EXPRES | -0,02  | 0,594 | 0,86892 | 1 |
| BIOCARTA_SODD_PATHWAY                | -0,02  | 0,594 | 0,6874  | 1 |
| KEGG_ARACHIDONIC_ACID_METABOLISM     | 0,02   | 0,594 | 0,40079 | 1 |
| GSE22886_NAIVE_CD8_TCELL_VS_MONOCY   | 0,02   | 0,594 | 0,50914 | 1 |
| GSE24634_TREG_VS_TCONV_POST_DAY3_IL  | 0,02   | 0,595 | 0,84092 | 1 |
| REACTOME_PI_METABOLISM               | -0,02  | 0,595 | 0,24418 | 1 |
| FERRARI_RESPONSE_TO_FENRETINIDE_DN   | 0,019  | 0,595 | 0,00594 | 1 |
| MODULE_401                           | 0,019  | 0,595 | 0,7054  | 1 |
| NIKOLSKY_BREAST_CANCER_12Q24_AMPLIFI | 0,019  | 0,596 | 0,70975 | 1 |
| GSE20715_WT_VS_TLR4_KO_48H_OZONE_I   | -0,019 | 0,596 | 0,21184 | 1 |
| GSE3982_MAST_CELL_VS_TH2_UP          | -0,019 | 0,597 | 0,16809 | 1 |
| GSE9037_CTRL_VS_LPS_4H_STIM_IRAK4_KC | -0,019 | 0,597 | 0,13245 | 1 |
| chr8q24                              | -0,019 | 0,597 | 0,84258 | 1 |
| DOUBLE_STRAND_BREAK_REPAIR           | -0,019 | 0,597 | 0,60125 | 1 |
| REACTOME_PYRUVATE_METABOLISM_AND_CI  | -0,019 | 0,598 | 0,24932 | 1 |
| REACTOME_TCA_CYCLE_AND_RESPIRATORY_  | 0,019  | 0,598 | 0,27451 | 1 |
| GSE29617_CTRL_VS_DAY3_TIV_FLU_VACCI  | -0,019 | 0,598 | 0,5397  | 1 |
| PKCA_DN.V1_UP                        | -0,019 | 0,599 | 0,04236 | 1 |
| CAR_MYST2                            | 0,019  | 0,599 | 0,5299  | 1 |
| REACTOME_LYSOSOME_VESICLE_BIOGENESIS | -0,019 | 0,602 | 0,52171 | 1 |
| CARBOXYLESTERASE_ACTIVITY            | -0,019 | 0,602 | 0,10651 | 1 |
| KEGG_DRUG_METABOLISM_CYTOCHROME_P4:  | 0,019  | 0,603 | 0,92672 | 1 |
| OUTER_MEMBRANE                       | -0,019 | 0,603 | 0,79374 | 1 |
| THILLAINADESAN_ZNF217_TARGETS_DN     | 0,019  | 0,603 | 0,2472  | 1 |

|                                       |        |       |         |   |
|---------------------------------------|--------|-------|---------|---|
| REACTOME_NUCLEOTIDE_EXCISION_REPAIR   | -0,019 | 0,603 | 0,60806 | 1 |
| VERNOCHET_ADIPOGENESIS                | 0,019  | 0,604 | 0,59417 | 1 |
| MODULE_465                            | -0,019 | 0,604 | 0,60448 | 1 |
| RHO_GUANYL_NUCLEOTIDE_EXCHANGE_FACT   | -0,019 | 0,606 | 0,02687 | 1 |
| RESPONSE_TO_OXIDATIVE_STRESS          | -0,019 | 0,606 | 0,83575 | 1 |
| KAMIKUBO_MYELOID_CEBPA_NETWORK        | 0,019  | 0,606 | 0,27515 | 1 |
| IIZUKA_LIVER_CANCER_PROGRESSION_G2_G3 | -0,019 | 0,606 | 0,32664 | 1 |
| GSE9988_ANTI_TREM1_VS_VEHICLE_TREATE  | -0,019 | 0,607 | 0,31448 | 1 |
| CARBOHYDRATE_TRANSPORT                | -0,019 | 0,607 | 0,8616  | 1 |
| GSE31082_DN_VS_DP_THYMOCYTE_UP        | -0,019 | 0,607 | 0,83393 | 1 |
| SECONDARY_METABOLIC_PROCESS           | -0,019 | 0,607 | 0,67836 | 1 |
| KEGG_OXIDATIVE_PHOSPHORYLATION        | 0,019  | 0,607 | 0,31226 | 1 |
| REACTOME_SYNTHESIS_OF_PIPS_AT_THE_GC  | -0,019 | 0,608 | 0,83186 | 1 |
| SMID_BREAST_CANCER_RELAPSE_IN_LUNG_C  | 0,019  | 0,608 | 0,00569 | 1 |
| GROWTH_CONE                           | -0,019 | 0,609 | 0,00352 | 1 |
| VETTER_TARGETS_OF_PRKCA_AND_ETS1_DN   | 0,019  | 0,609 | 0,6505  | 1 |
| KUROKAWA_LIVER_CANCER_EARLY_RECURRE   | 0,019  | 0,609 | 0,11747 | 1 |
| BIOCARTA_CD40_PATHWAY                 | -0,019 | 0,609 | 0,09026 | 1 |
| REACTOME_INNATE_IMMUNE_SYSTEM         | -0,019 | 0,609 | 0,45122 | 1 |
| GCGCCTT,MIR-525,MIR-524               | 0,019  | 0,61  | 0,856   | 1 |
| BIOCARTA_D4GDI_PATHWAY                | -0,019 | 0,61  | 0,78653 | 1 |
| REACTOME_GLYCOLYSIS                   | 0,019  | 0,61  | 0,12789 | 1 |
| chr10q                                | -0,019 | 0,611 | 0,56638 | 1 |
| ENDOPLASMIC_RETICULUM_PART            | -0,019 | 0,611 | 0,74823 | 1 |
| LIGASE_ACTIVITY_FORMING_CARBON_NITROG | -0,019 | 0,611 | 0,54847 | 1 |
| LIN_MELANOMA_COPY_NUMBER_DN           | -0,019 | 0,611 | 0,79027 | 1 |
| KEGG_ASCORBATE_AND_ALDARATE_METABC    | 0,019  | 0,611 | 0,34106 | 1 |
| REACTOME_REGULATION_OF_INSULIN_SECRE  | -0,019 | 0,612 | 0,10036 | 1 |
| BURTON_ADIPOGENESIS_5                 | -0,019 | 0,613 | 0,98355 | 1 |
| SENSORY_ORGAN_DEVELOPMENT             | -0,019 | 0,614 | 0,69081 | 1 |
| POLYSACCHARIDE_METABOLIC_PROCESS      | 0,019  | 0,614 | 0,86856 | 1 |
| REACTOME_HORMONE_SENSITIVE_LIPASE_HS  | -0,019 | 0,614 | 0,05227 | 1 |
| REACTOME_PLATELET_CALCIUM_HOMEOSTAS   | -0,019 | 0,614 | 0,50298 | 1 |
| NIKOLSKY_BREAST_CANCER_20Q11_AMPLIC   | 0,018  | 0,615 | 0,69553 | 1 |
| MITOCHONDRIAL_MEMBRANE                | -0,018 | 0,615 | 0,84531 | 1 |
| XU_HGF_SIGNALING_NOT_VIA_AKT1_6HR     | -0,018 | 0,615 | 0,87787 | 1 |
| GSE13485_DAY1_VS_DAY3_YF17D_VACCINI   | -0,018 | 0,615 | 0,94479 | 1 |
| REGULATION_OF_GENE_SPECIFIC_TRANSCRIP | -0,018 | 0,615 | 0,21604 | 1 |
| REACTOME_MAP_KINASE_ACTIVATION_IN_TL  | -0,018 | 0,615 | 0,68017 | 1 |
| chr1p12                               | -0,018 | 0,616 | 0,96302 | 1 |
| GCM_RBM8A                             | -0,018 | 0,617 | 0,36716 | 1 |
| BIOCARTA_TOLL_PATHWAY                 | -0,018 | 0,617 | 0,64997 | 1 |

|                                       |        |       |         |   |
|---------------------------------------|--------|-------|---------|---|
| GNF2_CD1D                             | 0,018  | 0,618 | 0,64293 | 1 |
| TACGGGT,MIR-99A,MIR-100,MIR-99B       | -0,018 | 0,618 | 0,13457 | 1 |
| CELLULAR_MACROMOLECULE_CATABOLIC_PR   | -0,018 | 0,619 | 0,61612 | 1 |
| LUDWICZEK_TREATING_IRON_OVERLOAD      | -0,018 | 0,62  | 0,55271 | 1 |
| GSE31082_CD4_VS_CD8_SP_THYMOCYTE_U    | -0,018 | 0,62  | 0,15046 | 1 |
| BIOCARTA_NFKB_PATHWAY                 | 0,018  | 0,621 | 0,62471 | 1 |
| MATTIOLI_MULTIPLE_MYELOMA_SUBGROUPS   | 0,018  | 0,621 | 0,07422 | 1 |
| REACTOME_FORMATION_OF_RNA_POL_II_ELC  | -0,018 | 0,621 | 0,84942 | 1 |
| OXIDOREDUCTASE_ACTIVITY_ACTING_ON_TH  | -0,018 | 0,621 | 0,15929 | 1 |
| REACTOME_N_GLYCAN_TRIMMING_IN_THE_EF  | 0,018  | 0,622 | 0,11992 | 1 |
| KEGG_PHENYLALANINE_METABOLISM         | -0,018 | 0,623 | 0,19176 | 1 |
| VERHAAK_AML_WITH_NPM1_MUTATED_UP      | -0,018 | 0,624 | 0,87667 | 1 |
| LIPID_TRANSPORTER_ACTIVITY            | -0,018 | 0,624 | 0,08047 | 1 |
| ANTIGEN_BINDING                       | -0,018 | 0,624 | 0,77858 | 1 |
| MATZUK_FERTILIZATION                  | -0,018 | 0,625 | 0,80041 | 1 |
| RODRIGUES_THYROID_CARCINOMA_ANAPLAS   | -0,018 | 0,625 | 0,00435 | 1 |
| NUCLEOBASENUCLEOSIDENUCLEOTIDE_AND_N  | 0,018  | 0,625 | 0,23442 | 1 |
| GSE11864_UNTREATED_VS_CSF1_IFNG_IN_M  | -0,018 | 0,626 | 0,00473 | 1 |
| GSE11864_CSF1_VS_CSF1_IFNG_IN_MAC_UF  | -0,018 | 0,626 | 0,02657 | 1 |
| CIRCADIAN_RHYTHM                      | 0,018  | 0,626 | 0,15784 | 1 |
| BIOCARTA_CLASSIC_PATHWAY              | 0,018  | 0,626 | 0,46453 | 1 |
| KEGG_STEROID_HORMONE_BIOSYNTHESIS     | -0,018 | 0,627 | 0,8639  | 1 |
| BRUNEAU_HEART_GREAT_VESSELS_AND_VAI   | -0,018 | 0,627 | 0,3616  | 1 |
| KEGG_ALPHA_LINOLENIC_ACID_METABOLISM  | -0,018 | 0,629 | 0,26813 | 1 |
| MYLLYKANGAS_AMPLIFICATION_HOT_SPOT_3  | -0,018 | 0,629 | 0,16337 | 1 |
| REACTOME_EXTRINSIC_PATHWAY_FOR_APOP   | 0,018  | 0,63  | 0,47845 | 1 |
| HISTONE_MODIFICATION                  | -0,018 | 0,63  | 0,1088  | 1 |
| LI_WILMS_TUMOR_VS_FETAL_KIDNEY_1_UP   | -0,018 | 0,633 | 0,09048 | 1 |
| BIOCARTA_41BB_PATHWAY                 | -0,018 | 0,633 | 0,69226 | 1 |
| TONKS_TARGETS_OF_RUNX1_RUNX1T1_FUSI   | -0,018 | 0,633 | 0,07022 | 1 |
| PID_WNT_CANONICAL_PATHWAY             | -0,018 | 0,633 | 0,3987  | 1 |
| REACTOME_FORMATION_OF_THE_HIV1_EARL   | -0,017 | 0,634 | 0,71753 | 1 |
| MITOCHONDRIAL_ENVELOPE                | -0,017 | 0,636 | 0,81109 | 1 |
| GCNP_SHH_UP_EARLY.V1_DN               | -0,017 | 0,636 | 0,05854 | 1 |
| GNF2_PECAM1                           | 0,017  | 0,637 | 0,79045 | 1 |
| REACTOME_ACTIVATION_OF_IRF3_IRF7_MEDI | -0,017 | 0,637 | 0,43963 | 1 |
| BIOCARTA_BLYMPHOCYTE_PATHWAY          | -0,017 | 0,637 | 0,86186 | 1 |
| REACTOME_IL_6_SIGNALING               | -0,017 | 0,637 | 0,41066 | 1 |
| BIOCARTA_CERAMIDE_PATHWAY             | 0,017  | 0,638 | 0,56543 | 1 |
| SUMI_HNF4A_TARGETS                    | 0,017  | 0,638 | 0,8847  | 1 |
| WANG_RECURRENT_LIVER_CANCER_DN        | -0,017 | 0,638 | 0,38443 | 1 |
| BIOCARTA_MONOCYTE_PATHWAY             | -0,017 | 0,639 | 0,40403 | 1 |

|                                       |        |       |         |   |
|---------------------------------------|--------|-------|---------|---|
| SPIELMAN_LYMPHOBLAST_EUROPEAN_VS_AS   | -0,017 | 0,639 | 0,52937 | 1 |
| TAKADA_GASTRIC_CANCER_COPY_NUMBER_I   | -0,017 | 0,641 | 0,74735 | 1 |
| PID_TOLL_ENDOGENOUS_PATHWAY           | -0,017 | 0,641 | 0,45171 | 1 |
| MORI_IMMATURE_B_LYMPHOCYTE_UP         | -0,017 | 0,642 | 0,77798 | 1 |
| MANTOVANI_NFKB_TARGETS_DN             | 0,017  | 0,644 | 0,15332 | 1 |
| REACTOME_SYNTHESIS_SECRETION_AND_INA  | 0,017  | 0,644 | 0,98349 | 1 |
| EMBRYO_IMPLANTATION                   | -0,017 | 0,645 | 0,73724 | 1 |
| MYLLYKANGAS_AMPLIFICATION_HOT_SPOT_2  | -0,017 | 0,645 | 0,54321 | 1 |
| TRANSPORT_VESICLE                     | 0,017  | 0,645 | 0,41069 | 1 |
| GNF2_CD48                             | -0,017 | 0,646 | 0,65319 | 1 |
| REGULATION_OF_JNK_CASCADE             | -0,017 | 0,646 | 0,04203 | 1 |
| chr3p11                               | 0,017  | 0,647 | 0,53266 | 1 |
| RIBOSOMAL_SUBUNIT                     | -0,017 | 0,647 | 0,75174 | 1 |
| HYDRO_LYASE_ACTIVITY                  | -0,017 | 0,648 | 0,56036 | 1 |
| CARBON_OXYGEN_LYASE_ACTIVITY          | -0,017 | 0,648 | 0,58019 | 1 |
| YAP1_DN                               | 0,017  | 0,648 | 0,08128 | 1 |
| NUCLEAR_ENVELOPE_ENDOPLASMIC_RETICUL  | -0,017 | 0,648 | 0,76974 | 1 |
| ZIRN_TRETINOIN_RESPONSE_WT1_DN        | -0,017 | 0,649 | 0,0561  | 1 |
| REACTOME_DSCAM_INTERACTIONS           | 0,017  | 0,65  | 0,85549 | 1 |
| ZHAN_MULTIPLE_MYELOMA_CD1_DN          | -0,017 | 0,65  | 0,10169 | 1 |
| chr17q11                              | 0,017  | 0,651 | 0,83936 | 1 |
| PARK_TRETINOIN_RESPONSE_AND_RARA_PL2  | 0,017  | 0,651 | 0,45562 | 1 |
| ONDER_CDH1_TARGETS_1_UP               | -0,017 | 0,652 | 0,02157 | 1 |
| BHAT_ESR1_TARGETS_NOT_VIA_AKT1_DN     | 0,017  | 0,652 | 0,30519 | 1 |
| WIKMAN_ASBESTOS_LUNG_CANCER_DN        | -0,017 | 0,653 | 0,41738 | 1 |
| chr4p13                               | -0,016 | 0,653 | 0,12886 | 1 |
| REACTOME_INTERFERON_ALPHA_BETA_SIGNA  | -0,016 | 0,653 | 0,74839 | 1 |
| REACTOME_TETRAHYDROBIOPTERIN_BH4_SYN  | 0,016  | 0,653 | 0,25724 | 1 |
| MORF_PPP2R5E                          | -0,016 | 0,654 | 0,38282 | 1 |
| FULCHER_INFLAMMATORY_RESPONSE_LLECTIN | -0,016 | 0,654 | 0,5597  | 1 |
| GSE27786_BCELL_VS_NKCELL_DN           | -0,016 | 0,654 | 0,03926 | 1 |
| KEGG_NUCLEOTIDE_EXCISION_REPAIR       | -0,016 | 0,655 | 0,6992  | 1 |
| REGULATION_OF_MAPKKK_CASCADE          | 0,016  | 0,655 | 0,20076 | 1 |
| KEGG_LEISHMANIA_INFECTIO              | -0,016 | 0,656 | 0,78751 | 1 |
| PROTEIN_AMINO_ACID_AUTOPHOSPHORYLATI  | 0,016  | 0,656 | 0,76906 | 1 |
| NIKOLSKY_BREAST_CANCER_17Q11_Q21_AI   | -0,016 | 0,657 | 0,43747 | 1 |
| GNF2_CD97                             | -0,016 | 0,657 | 0,62925 | 1 |
| WILSON_PROTEASES_AT_TUMOR_BONE_INTE   | -0,016 | 0,657 | 0,96308 | 1 |
| REACTOME_SYNTHESIS_OF_BILE_ACIDS_AND  | 0,016  | 0,658 | 0,77576 | 1 |
| REACTOME_TRAFFICKING_AND_PROCESSING_  | 0,016  | 0,658 | 0,47287 | 1 |
| FUJIWARA_PARK2_HEPATOCYTE_PROLIFERAT  | -0,016 | 0,658 | 0,08298 | 1 |
| RICKMAN_TUMOR_DIFFERENTIATED_MODERAT  | -0,016 | 0,658 | 0,2272  | 1 |

|                                      |        |       |         |   |
|--------------------------------------|--------|-------|---------|---|
| BHAT_ESR1_TARGETS_VIA_AKT1_DN        | 0,016  | 0,659 | 0,54514 | 1 |
| BIOCARTA_ASBCCELL_PATHWAY            | -0,016 | 0,659 | 0,64405 | 1 |
| SABATES_COLORECTAL_ADENOMA_SIZE_UP   | -0,016 | 0,66  | 0,0194  | 1 |
| BIOCARTA_ETC_PATHWAY                 | 0,016  | 0,66  | 0,10293 | 1 |
| KASLER_HDAC7_TARGETS_1_DN            | 0,016  | 0,66  | 0,60565 | 1 |
| GSE24102_GRANULOCYSTIC_MDSC_VS_NEUT  | -0,016 | 0,66  | 0,00555 | 1 |
| KRISHNAN_FURIN_TARGETS_DN            | 0,016  | 0,661 | 0,16931 | 1 |
| GNF2_CD33                            | 0,016  | 0,661 | 0,77225 | 1 |
| SANA_RESPONSE_TO_IFNG_UP             | -0,016 | 0,662 | 0,81941 | 1 |
| BUDHU_LIVER_CANCER_METASTASIS_UP     | -0,016 | 0,663 | 0,92179 | 1 |
| FRASOR_TAMOXIFEN_RESPONSE_UP         | 0,016  | 0,664 | 0,44661 | 1 |
| CTACTAG,MIR-325                      | -0,016 | 0,664 | 0,98826 | 1 |
| GCM_RAN                              | -0,016 | 0,664 | 0,4377  | 1 |
| UNFOLDED_PROTEIN_BINDING             | -0,016 | 0,664 | 0,93501 | 1 |
| HOLLEMAN_PREDNISOLONE_RESISTANCE_B_  | -0,016 | 0,665 | 0,15761 | 1 |
| GSE22886_NAIVE_CD4_TCELL_VS_MONOCY   | 0,016  | 0,666 | 0,49369 | 1 |
| PHAGOCYTOSIS                         | -0,016 | 0,666 | 0,09453 | 1 |
| GSE13485_CTRL_VS_DAY1_YF17D_VACCINE  | 0,016  | 0,666 | 0,37869 | 1 |
| BIOCARTA_NTHI_PATHWAY                | -0,016 | 0,667 | 0,85746 | 1 |
| INTERACTION_WITH_HOST                | 0,016  | 0,667 | 0,43096 | 1 |
| NEGATIVE_REGULATION_OF_DNA_BINDING   | -0,016 | 0,667 | 0,69649 | 1 |
| GSE6269_HEALTHY_VS_FLU_INF_PBMC_DN   | -0,016 | 0,667 | 0,97589 | 1 |
| KEGG_TRYPTOPHAN_METABOLISM           | -0,016 | 0,668 | 0,91512 | 1 |
| INTERCELLULAR_JUNCTION_ASSEMBLY      | 0,016  | 0,669 | 0,48451 | 1 |
| RACTNNRTTNC_UNKNOWN                  | -0,016 | 0,669 | 0,19987 | 1 |
| REACTOME_AMINE_COMPOUND_SLC_TRANSP   | -0,016 | 0,669 | 0,9258  | 1 |
| FLECHNER_BIOPSY_KIDNEY_TRANSPLANT_RE | -0,016 | 0,67  | 0,2237  | 1 |
| KEGG_GLYCOLYSIS_GLUONEOGENESIS       | -0,016 | 0,67  | 0,75555 | 1 |
| GSE13485_PRE_VS_POST_YF17D_VACCINAT  | -0,016 | 0,67  | 0,90057 | 1 |
| DETECTION_OF_BIOTIC_STIMULUS         | -0,016 | 0,67  | 0,19062 | 1 |
| ANTIPORTER_ACTIVITY                  | 0,016  | 0,67  | 0,15174 | 1 |
| GNF2_SELL                            | -0,016 | 0,671 | 0,55597 | 1 |
| chrXq                                | 0,016  | 0,671 | 0,64682 | 1 |
| GNF2_PTPN6                           | -0,016 | 0,672 | 0,59413 | 1 |
| REACTOME_GROWTH_HORMONE_RECEPTOR_S   | -0,015 | 0,673 | 0,02423 | 1 |
| BIOCARTA_EIF2_PATHWAY                | 0,015  | 0,673 | 0,05889 | 1 |
| MODULE_25                            | 0,015  | 0,674 | 0,49081 | 1 |
| CAGNYGKNAAA_UNKNOWN                  | -0,015 | 0,674 | 0,00023 | 1 |
| BIOCARTA_PTEN_PATHWAY                | 0,015  | 0,674 | 0,94014 | 1 |
| MODULE_212                           | -0,015 | 0,675 | 0,57711 | 1 |
| REACTOME_REGULATION_OF_BETA_CELL_DE  | -0,015 | 0,676 | 0,23461 | 1 |
| REACTOME_Glutamate_NEUROTRANSMITTEF  | -0,015 | 0,676 | 0,01925 | 1 |

|                                        |        |       |         |   |
|----------------------------------------|--------|-------|---------|---|
| REACTOME_ACTIVATION_OF_THE_AP1_FAMILY  | 0,015  | 0,677 | 0,64352 | 1 |
| MORF_RAB11A                            | -0,015 | 0,677 | 0,48414 | 1 |
| RECEPTOR_MEDIATED_ENDOCYTOSIS          | -0,015 | 0,677 | 0,09105 | 1 |
| KEGG_CITRATE_CYCLE_TCA_CYCLE           | 0,015  | 0,677 | 0,11417 | 1 |
| WU_HBX_TARGETS_3_DN                    | -0,015 | 0,678 | 0,29928 | 1 |
| TRANS_GOLGI_NETWORK_TRANSPORT_VESIC    | 0,015  | 0,679 | 0,9171  | 1 |
| BAUS_TFF2_TARGETS_DN                   | -0,015 | 0,679 | 0,8824  | 1 |
| MORF_PPP2R4                            | -0,015 | 0,679 | 0,83202 | 1 |
| REACTOME_BILE_SALT_AND_ORGANIC_ANION   | -0,015 | 0,68  | 0,69545 | 1 |
| MIKKELSEN_ES_LCP_WITH_H3K27ME3         | -0,015 | 0,683 | 0,84365 | 1 |
| BIOCARTA_EPONFKB_PATHWAY               | 0,015  | 0,684 | 0,82747 | 1 |
| MODULE_415                             | -0,015 | 0,684 | 0,66936 | 1 |
| ER_NUCLEAR_SIGNALING_PATHWAY           | -0,015 | 0,685 | 0,55001 | 1 |
| VALK_AML_CLUSTER_7                     | 0,015  | 0,686 | 0,42514 | 1 |
| REGULATION_OF_ENDOCYTOSIS              | 0,015  | 0,687 | 0,06891 | 1 |
| REACTOME_NUCLEAR_RECEPTOR_TRANSCRIP    | 0,015  | 0,687 | 0,00761 | 1 |
| REACTOME_DCC_MEDIATED_ATTRACTIVE_SIG   | -0,015 | 0,687 | 0,51498 | 1 |
| MODULE_82                              | -0,015 | 0,689 | 0,627   | 1 |
| chr6p23                                | -0,015 | 0,689 | 0,3545  | 1 |
| SECRETORY_GRANULE                      | -0,015 | 0,689 | 0,24872 | 1 |
| KEGG_ALLOGRAFT_REJECTION               | -0,015 | 0,691 | 0,82708 | 1 |
| GNF2_BNIP3L                            | -0,015 | 0,691 | 0,54366 | 1 |
| ZHAN_MULTIPLE_MYELOMA_LB_UP            | -0,015 | 0,692 | 0,00491 | 1 |
| GAVIN_PDE3B_TARGETS                    | -0,015 | 0,692 | 0,60213 | 1 |
| MAP_KINASE_KINASE_KINASE_ACTIVITY      | -0,015 | 0,692 | 0,94473 | 1 |
| chr10q26                               | 0,015  | 0,693 | 0,26751 | 1 |
| VERRECCHIA_RESPONSE_TO_TGFB1_C3        | -0,014 | 0,693 | 0,24028 | 1 |
| SUZUKI_CTCFL_TARGETS_UP                | -0,014 | 0,693 | 0,00185 | 1 |
| TRANSITION_METAL_ION_TRANSMEMBRANE_    | 0,014  | 0,694 | 0,87563 | 1 |
| PIGMENT_BIOSYNTHETIC_PROCESS           | -0,014 | 0,694 | 0,47864 | 1 |
| CROMER_TUMORIGENESIS_DN                | -0,014 | 0,694 | 0,90668 | 1 |
| REACTOME_NEF_MEDIATED_DOWNREGULATIC    | -0,014 | 0,694 | 0,57586 | 1 |
| KEGG_GLYCOSPHINGOLIPID_BIOSYNTHESIS_GA | -0,014 | 0,695 | 0,86491 | 1 |
| MORF_ATOX1                             | -0,014 | 0,695 | 0,34032 | 1 |
| GSE17721_0.5H_VS_8H_CPG_BMDM_UP        | -0,014 | 0,696 | 0,64725 | 1 |
| CSR_EARLY_UP.V1_DN                     | -0,014 | 0,696 | 0,0015  | 1 |
| GSE29618_BCELL_VS_MONOCYTE_DAY7_FLI    | 0,014  | 0,698 | 0,71393 | 1 |
| GSE360_L_DONOVANI_VS_B_MALAYI_HIGH_    | -0,014 | 0,698 | 0,41531 | 1 |
| IVANOVA_HEMATOPOIESIS_MATURE_CELL      | -0,014 | 0,698 | 0,71545 | 1 |
| REACTOME_INTERFERON_GAMMA_SIGNALING    | -0,014 | 0,698 | 0,88108 | 1 |
| BIOCARTA_TNFR2_PATHWAY                 | -0,014 | 0,698 | 0,24014 | 1 |
| GCM_BEEN1                              | 0,014  | 0,698 | 0,43368 | 1 |

|                                       |        |       |         |   |
|---------------------------------------|--------|-------|---------|---|
| GSE37416_0H_VS_3H_F_TULARENSIS_LVS_   | -0,014 | 0,698 | 0,24648 | 1 |
| GSE16522_ANTI_CD3CD28_STIM_VS_UNSTIN  | -0,014 | 0,699 | 0,26414 | 1 |
| SA_PROGRAMMED_CELL_DEATH              | -0,014 | 0,699 | 0,02499 | 1 |
| GSE11057_CD4_EFF_MEM_VS_PBMC_DN       | -0,014 | 0,7   | 0,88523 | 1 |
| COLDREN_GEFITINIB_RESISTANCE_DN       | -0,014 | 0,701 | 0,32548 | 1 |
| LUI_THYROID_CANCER_CLUSTER_4          | 0,014  | 0,701 | 0,78854 | 1 |
| MOOHTA_GLYCOGEN_METABOLISM            | 0,014  | 0,701 | 0,51152 | 1 |
| GSE360_L_DONOVANI_VS_T_GONDII_MAC_U   | -0,014 | 0,702 | 0,25528 | 1 |
| KEGG_PANTOTHENATE_AND_COA_BIOSYNTH    | 0,014  | 0,702 | 0,82333 | 1 |
| HOFFMAN_CLOCK_TARGETS_UP              | -0,014 | 0,702 | 0,0197  | 1 |
| RESPONSE_TO_TOXIN                     | 0,014  | 0,703 | 0,19847 | 1 |
| REACTOME_ION_TRANSPORT_BY_P_TYPE_AT   | -0,014 | 0,703 | 0,38729 | 1 |
| GNF2_S100A4                           | 0,014  | 0,703 | 0,82536 | 1 |
| MAGRANGEAS_MULTIPLE_MYELOMA_IGG_VS_   | 0,014  | 0,704 | 0,26035 | 1 |
| SIG_CD40PATHWAYMAP                    | 0,014  | 0,704 | 0,33842 | 1 |
| MORF_GPX4                             | -0,014 | 0,704 | 0,68473 | 1 |
| BIOCARTA_NEUROTRANSMITTERS_PATHWAY    | 0,014  | 0,704 | 0,37703 | 1 |
| GSE17721_CTRL_VS_POLYIC_6H_BMDM_UP    | -0,014 | 0,705 | 0,49514 | 1 |
| ST_WNT_CA2_CYCLIC_GMP_PATHWAY         | -0,014 | 0,707 | 0,09479 | 1 |
| MODULE_93                             | 0,014  | 0,708 | 0,69594 | 1 |
| ESTABLISHMENT_AND_OR_MAINTENANCE_OF   | -0,014 | 0,709 | 0,48515 | 1 |
| CHIANG_LIVER_CANCER_SUBCLASS_PROLIFER | 0,014  | 0,709 | 0,05488 | 1 |
| GNF2_ITGB2                            | -0,014 | 0,711 | 0,61095 | 1 |
| BYSTROEM_CORRELATED_WITH_IL5_UP       | -0,014 | 0,711 | 0,88424 | 1 |
| GARGALOVIC_RESPONSE_TO_OXIDIZED_PHOS  | 0,014  | 0,712 | 0,79175 | 1 |
| KEGG_TYROSINE_METABOLISM              | -0,014 | 0,712 | 0,06934 | 1 |
| ZHANG_RESPONSE_TO_CANTHARIDIN_UP      | -0,013 | 0,714 | 0,83191 | 1 |
| NIKOLSKY_BREAST_CANCER_19P13_AMPLICC  | 0,013  | 0,715 | 0,24424 | 1 |
| TCCGTCC,MIR-184                       | 0,013  | 0,716 | 0,52098 | 1 |
| ABRAHAM_ALPC_VS_MULTIPLE_MYELOMA_UI   | -0,013 | 0,717 | 0,0865  | 1 |
| IIZUKA_LIVER_CANCER_PROGRESSION_LO_L1 | 0,013  | 0,717 | 0,5022  | 1 |
| FERREIRA_EWINGS_SARCOMA_UNSTABLE_VS   | 0,013  | 0,717 | 0,0816  | 1 |
| PID_ALK2PATHWAY                       | 0,013  | 0,718 | 0,82832 | 1 |
| CHUNG_BLISTER_CYTOTOXICITY_DN         | -0,013 | 0,718 | 0,33572 | 1 |
| MATZUK_OVULATION                      | -0,013 | 0,718 | 0,09479 | 1 |
| MITOCHONDRIAL_PART                    | -0,013 | 0,718 | 0,85364 | 1 |
| ST_INTERFERON_GAMMA_PATHWAY           | -0,013 | 0,719 | 0,56657 | 1 |
| CHANDRAN_METASTASIS_TOP50_UP          | 0,013  | 0,719 | 0,78603 | 1 |
| POSITIVE_REGULATION_OF_SECRETION      | 0,013  | 0,719 | 0,61298 | 1 |
| PARK_TRETINOIN_RESPONSE               | -0,013 | 0,72  | 0,9172  | 1 |
| GENERATION_OF_PRECURSOR_METABOLITES_  | -0,013 | 0,72  | 0,13287 | 1 |
| RODRIGUES_THYROID_CARCINOMA_POORLY_I  | -0,013 | 0,72  | 0,03847 | 1 |



|                                      |        |       |         |   |
|--------------------------------------|--------|-------|---------|---|
| TESAR_ALK_TARGETS_HUMAN_ES_5D_UP     | 0,013  | 0,72  | 0,02804 | 1 |
| JIANG_CORE_DUPLICATION_GENES         | 0,013  | 0,722 | 0,42224 | 1 |
| WILENSKY_RESPONSE_TO_DARAPLADIB      | -0,013 | 0,723 | 0,96828 | 1 |
| MORI_EMU_MYC_LYMPHOMA_BY_ONSET_TIMI  | -0,013 | 0,723 | 0,4099  | 1 |
| KEGG_TYPE_II_DIABETES_MELLITUS       | -0,013 | 0,725 | 0,0043  | 1 |
| GSE11057_NAIVE_CD4_VS_PBMC_CD4_TCELL | -0,013 | 0,725 | 0,93211 | 1 |
| MODULE_431                           | -0,013 | 0,725 | 0,22628 | 1 |
| MYLLYKANGAS_AMPLIFICATION_HOT_SPOT_1 | 0,013  | 0,726 | 0,85416 | 1 |
| AMUNDSON_DNA_DAMAGE_RESPONSE_TP53    | -0,013 | 0,726 | 0,12375 | 1 |
| ATPASE_ACTIVITY_COUPLED_TO_TRANSMEM  | 0,013  | 0,726 | 0,30499 | 1 |
| NAKAMURA_ALVEOLAR_EPITHELIUM         | 0,013  | 0,726 | 0,16617 | 1 |
| REACTOME_P2Y_RECEPTORS               | 0,013  | 0,726 | 0,67972 | 1 |
| REACTOME_BIOLOGICAL_OXIDATIONS       | -0,013 | 0,726 | 0,17999 | 1 |
| chr12q22                             | -0,013 | 0,727 | 0,19582 | 1 |
| GERHOLD_RESPONSE_TO_TZD_UP           | 0,013  | 0,728 | 0,1924  | 1 |
| NADLER_OBESITY_DN                    | 0,013  | 0,729 | 0,72278 | 1 |
| ENERGY_RESERVE_METABOLIC_PROCESS     | -0,013 | 0,729 | 0,36992 | 1 |
| JUBAN_TARGETS_OF_SPI1_AND_FLI1_UP    | 0,013  | 0,729 | 0,40636 | 1 |
| PID_FASPATHWAY                       | -0,013 | 0,729 | 0,66702 | 1 |
| REACTOME_ACYL_CHAIN_REMODELLING_OF_  | -0,013 | 0,729 | 0,09309 | 1 |
| OUYANG_PROSTATE_CANCER_PROGRESSION_  | -0,013 | 0,73  | 0,2503  | 1 |
| KEGG_AUTOIMMUNE_THYROID_DISEASE      | -0,013 | 0,73  | 0,72192 | 1 |
| REACTOME_REGULATION_OF_PYRUVATE_DEH  | 0,013  | 0,731 | 0,32369 | 1 |
| GSE14308_NAIVE_CD4_TCELL_VS_INDUCED_ | -0,013 | 0,732 | 0,01135 | 1 |
| SMID_BREAST_CANCER_RELAPSE_IN_LIVER_ | 0,013  | 0,732 | 0,00071 | 1 |
| KEGG_CYTOSOLIC_DNA_SENSING_PATHWAY   | -0,012 | 0,733 | 0,80743 | 1 |
| REACTOME_TRANSPORT_OF_GLUCOSE_AND_   | 0,012  | 0,734 | 0,49622 | 1 |
| KEGG_COMPLEMENT_AND_COAGULATION_CA   | -0,012 | 0,734 | 0,12276 | 1 |
| GOLGI_ASSOCIATED_VESICLE             | -0,012 | 0,735 | 0,77413 | 1 |
| TERAMOTO_OPN_TARGETS_CLUSTER_1       | 0,012  | 0,735 | 0,58862 | 1 |
| YAO_TEMPORAL_RESPONSE_TO_PROGESTERC  | -0,012 | 0,735 | 0,66274 | 1 |
| VACUOLE                              | -0,012 | 0,736 | 0,27338 | 1 |
| MARSON_FOXP3_TARGETS_STIMULATED_DN   | -0,012 | 0,737 | 0,1035  | 1 |
| chr6q25                              | -0,012 | 0,737 | 0,46311 | 1 |
| GCM_CHUK                             | -0,012 | 0,737 | 0,85495 | 1 |
| BIOCARTA_LLECTIN_PATHWAY             | 0,012  | 0,738 | 0,11186 | 1 |
| MAGRANGEAS_MULTIPLE_MYELOMA_IGLL_VS  | -0,012 | 0,738 | 0,02998 | 1 |
| BURTON_ADIPOGENESIS_10               | -0,012 | 0,738 | 0,39353 | 1 |
| BARRIER_COLON_CANCER_RECURRENCE_DN   | 0,012  | 0,738 | 0,58891 | 1 |
| BASAKI_YBX1_TARGETS_DN               | -0,012 | 0,739 | 0,18304 | 1 |
| TURASHVILI_BREAST_CARCINOMA_DUCTAL_  | 0,012  | 0,739 | 0,69658 | 1 |
| GSE3982_DC_VS_EFF_MEMORY_CD4_TCELL_  | 0,012  | 0,739 | 0,83576 | 1 |

|                                       |        |       |         |   |
|---------------------------------------|--------|-------|---------|---|
| SHANK_TAL1_TARGETS_DN                 | -0,012 | 0,739 | 0,095   | 1 |
| MORF_PTPN9                            | -0,012 | 0,74  | 0,18521 | 1 |
| HISTONE_METHYLTRANSFERASE_ACTIVITY    | -0,012 | 0,74  | 0,50238 | 1 |
| I_KAPPAB_KINASE_NF_KAPPAB_CASCADE     | -0,012 | 0,74  | 0,50141 | 1 |
| SH3_DOMAIN_BINDING                    | -0,012 | 0,741 | 0,00476 | 1 |
| INAMURA_LUNG_CANCER_SCC_SUBTYPES_DN   | -0,012 | 0,743 | 0,8532  | 1 |
| LIAN_LIPA_TARGETS_3M                  | -0,012 | 0,744 | 0,89912 | 1 |
| GSE13306_LAMINA_PROPRIA_VS_SPLEEN_TF  | -0,012 | 0,745 | 0,16257 | 1 |
| GSE22886_DAY0_VS_DAY7_MONOCYTE_IN_    | -0,012 | 0,746 | 0,44257 | 1 |
| STEROID_METABOLIC_PROCESS             | -0,012 | 0,746 | 0,44552 | 1 |
| BOYALT_LIVER_CANCER_SUBCLASS_G123_    | -0,012 | 0,746 | 0,23045 | 1 |
| chr8p21                               | -0,012 | 0,746 | 0,21026 | 1 |
| STEGER_ADIPOGENESIS_UP                | 0,012  | 0,746 | 0,41192 | 1 |
| KIM_BIPOLAR_DISORDER_OLIGODENDROCYTE_ | -0,012 | 0,747 | 0,58927 | 1 |
| CREIGHTON_ENDOCRINE_THERAPY_RESISTAN  | 0,012  | 0,747 | 0,77219 | 1 |
| GOLGI_APPARATUS                       | -0,012 | 0,748 | 0,48494 | 1 |
| GNF2_MCL1                             | 0,012  | 0,749 | 0,99646 | 1 |
| PID_SMAD2_3PATHWAY                    | -0,012 | 0,75  | 0,2545  | 1 |
| chr21q21                              | -0,012 | 0,75  | 0,38861 | 1 |
| AMINO_ACID_TRANSPORT                  | 0,012  | 0,751 | 0,47318 | 1 |
| NAKAMURA_LUNG_CANCER_DIFFERENTIATION  | 0,012  | 0,752 | 0,80651 | 1 |
| MODULE_135                            | -0,012 | 0,752 | 0,14433 | 1 |
| VANLOO_SP3_TARGETS_DN                 | 0,012  | 0,753 | 0,90656 | 1 |
| GSE3982_NEUTROPHIL_VS_NKCELL_UP       | -0,011 | 0,754 | 0,97526 | 1 |
| chr7q11                               | -0,011 | 0,756 | 0,30444 | 1 |
| MIZUSHIMA_AUTOPHAGOSOME_FORMATION     | 0,011  | 0,756 | 0,95842 | 1 |
| JU_AGING_TERC_TARGETS_DN              | -0,011 | 0,757 | 0,40055 | 1 |
| REACTOME_ACYL_CHAIN_REMODELLING_OF_   | 0,011  | 0,757 | 0,44069 | 1 |
| MIKHAYLOVA_OXIDATIVE_STRESS_RESPONSE  | -0,011 | 0,757 | 0,81974 | 1 |
| MIKI_COEXPRESSED_WITH_CYP19A1         | 0,011  | 0,758 | 0,70866 | 1 |
| ST_JNK_MAPK_PATHWAY                   | -0,011 | 0,758 | 0,19902 | 1 |
| BROWNE_INTERFERON_RESPONSIVE_GENES    | -0,011 | 0,758 | 0,99694 | 1 |
| MODULE_368                            | -0,011 | 0,758 | 0,70418 | 1 |
| GCM_SIRT2                             | -0,011 | 0,758 | 0,20888 | 1 |
| GSE29618_MONOCYTE_VS_PDC_UP           | -0,011 | 0,759 | 0,80786 | 1 |
| KEGG_CIRCADIAN_RHYTHM_MAMMAL          | 0,011  | 0,759 | 0,13884 | 1 |
| chr14q32                              | 0,011  | 0,759 | 0,2454  | 1 |
| REACTOME_MRNA_CAPPING                 | -0,011 | 0,76  | 0,92093 | 1 |
| VERRECCHIA_RESPONSE_TO_TGFB1_C6       | -0,011 | 0,761 | 0,40765 | 1 |
| KYNG_ENVIRONMENTAL_STRESS_RESPONSE_   | 0,011  | 0,761 | 0,67753 | 1 |
| BIOCARTA_CFTR_PATHWAY                 | -0,011 | 0,762 | 0,17321 | 1 |
| chr6q21                               | -0,011 | 0,763 | 0,39198 | 1 |

|                                        |        |       |         |   |
|----------------------------------------|--------|-------|---------|---|
| CELLULAR_POLYSACCHARIDE_METABOLIC_PR   | 0,011  | 0,763 | 0,7866  | 1 |
| BIOCARTA_TID_PATHWAY                   | 0,011  | 0,763 | 0,64125 | 1 |
| MODULE_106                             | -0,011 | 0,764 | 0,09912 | 1 |
| LOPEZ_MESOTELIOMA_SURVIVAL_TIME_DN     | 0,011  | 0,766 | 0,88929 | 1 |
| REACTOME_THE_NLRP3_INFLAMMASOME        | 0,011  | 0,766 | 0,75561 | 1 |
| REACTOME_JNK_C_JUN_KINASES_PHOSPHOR    | 0,011  | 0,766 | 0,46674 | 1 |
| PIONTEK_PKD1_TARGETS_UP                | -0,011 | 0,767 | 0,15969 | 1 |
| chr22q12                               | -0,011 | 0,767 | 0,45595 | 1 |
| GSE31082_DN_VS_DP_THYMOCYTE_DN         | -0,011 | 0,768 | 0,28441 | 1 |
| KEGG_RIG_I_LIKE_RECEPTOR_SIGNALING_PAT | -0,011 | 0,769 | 0,9973  | 1 |
| SWEET_KRAS_ONCOGENIC_SIGNATURE         | -0,011 | 0,77  | 0,86776 | 1 |
| KIM_GLIS2_TARGETS_DN                   | 0,011  | 0,77  | 0,72497 | 1 |
| NAKAYAMA_SOFT_TISSUE_TUMORS_PCA1_UI    | -0,011 | 0,77  | 0,75412 | 1 |
| DING_LUNG_CANCER_EXPRESSION_BY_COPY_   | -0,011 | 0,772 | 0,89659 | 1 |
| MYLLYKANGAS_AMPLIFICATION_HOT_SPOT_9   | -0,011 | 0,772 | 0,36157 | 1 |
| REACTOME_CREATION_OF_C4_AND_C2_ACTI    | 0,011  | 0,773 | 0,94017 | 1 |
| LIU_TOPBP1_TARGETS                     | -0,011 | 0,773 | 0,07644 | 1 |
| ALDO_KETO_REDUCTASE_ACTIVITY           | 0,011  | 0,773 | 0,88083 | 1 |
| WEBER_METHYLATED_LCP_IN_SPERM_UP       | 0,011  | 0,773 | 0,64744 | 1 |
| KEGG_PROTEIN_EXPORT                    | -0,011 | 0,774 | 0,50668 | 1 |
| WILLIAMS_ESR1_TARGETS_DN               | -0,01  | 0,776 | 0,16667 | 1 |
| TONKS_TARGETS_OF_RUNX1_RUNX1T1_FUSI    | -0,01  | 0,777 | 0,15976 | 1 |
| GSE11864_UNTREATED_VS_CSF1_IN_MAC_I    | 0,01   | 0,777 | 0,51004 | 1 |
| ZHOU_PANCREATIC_EXOCRINE_PROGENITOR    | -0,01  | 0,778 | 0,57387 | 1 |
| GAZDA_DIAMOND_BLACKFAN_ANEMIA_MYEL     | 0,01   | 0,778 | 0,2363  | 1 |
| chr17p13                               | -0,01  | 0,779 | 0,38777 | 1 |
| GILMORE_CORE_NFKB_PATHWAY              | 0,01   | 0,78  | 0,93232 | 1 |
| REACTOME_SYNTHESIS_OF_SUBSTRATES_IN_   | -0,01  | 0,78  | 0,9852  | 1 |
| WIEMANN_TELOMERE_SHORTENING_AND_CHF    | 0,01   | 0,781 | 0,42342 | 1 |
| BIOCARTA_PS1_PATHWAY                   | -0,01  | 0,782 | 0,65139 | 1 |
| BIOCARTA_FEEDER_PATHWAY                | -0,01  | 0,782 | 0,19929 | 1 |
| REACTOME_NUCLEAR_EVENTS_KINASE_AND_    | 0,01   | 0,783 | 0,86653 | 1 |
| LOPEZ_MBD_TARGETS_IMPRINTED_AND_X_LI   | 0,01   | 0,784 | 0,44633 | 1 |
| BARRIER_CANCER_RELAPSE_NORMAL_SAMPL    | -0,01  | 0,784 | 0,13619 | 1 |
| SCHURINGA_STAT5A_TARGETS_DN            | 0,01   | 0,784 | 0,65867 | 1 |
| YORDY_RECIPROCAL_REGULATION_BY_ETS1_   | -0,01  | 0,784 | 0,54568 | 1 |
| GNF2_CASP1                             | 0,01   | 0,785 | 0,87335 | 1 |
| GRANDVAUX_IRF3_TARGETS_UP              | -0,01  | 0,786 | 0,92326 | 1 |
| CREIGHTON_ENDOCRINE_THERAPY_RESISTAN   | -0,01  | 0,786 | 0,01234 | 1 |
| NEGATIVE_REGULATION_OF_CELL_ADHESION   | -0,01  | 0,786 | 0,77433 | 1 |
| MONOCARBOXYLIC_ACID_TRANSMEMBRANE_1    | 0,01   | 0,787 | 0,8126  | 1 |
| chr9q34                                | -0,01  | 0,788 | 0,10436 | 1 |

|                                       |        |       |         |   |
|---------------------------------------|--------|-------|---------|---|
| GSE29618_MONOCYTE_VS_MDC_DAY7_FLU     | 0,01   | 0,788 | 0,58189 | 1 |
| NIKOLSKY_BREAST_CANCER_5P15_AMPLICON  | -0,01  | 0,788 | 0,56428 | 1 |
| RESPONSE_TO_NUTRIENT_LEVELS           | 0,01   | 0,79  | 0,05565 | 1 |
| chr5q31                               | 0,01   | 0,79  | 0,31053 | 1 |
| BALDWIN_PRKCI_TARGETS_UP              | -0,01  | 0,79  | 0,45768 | 1 |
| HYDROLASE_ACTIVITY_ACTING_ON_GLYCOSY  | 0,01   | 0,792 | 0,5189  | 1 |
| PRAMOONJAGO_SOX4_TARGETS_UP           | 0,01   | 0,793 | 0,51328 | 1 |
| CAFFAREL_RESPONSE_TO_THC_24HR_3_UP    | 0,01   | 0,793 | 0,81807 | 1 |
| PHOSPHOINOSITIDE_BINDING              | -0,01  | 0,793 | 0,29888 | 1 |
| KORKOLA_CHORIOCARCINOMA_DN            | 0,01   | 0,794 | 0,2926  | 1 |
| OSMAN_BLADDER_CANCER_UP               | -0,009 | 0,796 | 0,99472 | 1 |
| GERHOLD_ADIPOGENESIS_UP               | -0,009 | 0,796 | 0,158   | 1 |
| REGULATION_OF_PROTEIN_SECRETION       | 0,009  | 0,797 | 0,29716 | 1 |
| GSE39820_CTRL_VS_TGFBETA3_IL6_CD4_T   | 0,009  | 0,797 | 0,28991 | 1 |
| SMIRNOV_CIRCULATING_ENDOTHELIOCYTES_I | 0,009  | 0,798 | 0,75592 | 1 |
| GCM_DLG1                              | -0,009 | 0,799 | 0,60966 | 1 |
| LIGAND_DEPENDENT_NUCLEAR_RECEPTOR_A   | 0,009  | 0,799 | 0,00842 | 1 |
| BREDEMEYER_RAG_SIGNALING_VIA_ATM_NOT  | 0,009  | 0,8   | 0,12056 | 1 |
| GNF2_HLA-C                            | -0,009 | 0,8   | 0,71752 | 1 |
| INGRAM_SHH_TARGETS                    | -0,009 | 0,8   | 0,08438 | 1 |
| CYTAGCAAY_UNKNOWN                     | -0,009 | 0,8   | 0,00035 | 1 |
| SU_PANCREAS                           | 0,009  | 0,8   | 0,16764 | 1 |
| WATANABE_ULCERATIVE_COLITIS_WITH_CAN  | -0,009 | 0,801 | 0,23736 | 1 |
| PID_HDAC_CLASSI_PATHWAY               | -0,009 | 0,802 | 0,163   | 1 |
| STEROID_BINDING                       | 0,009  | 0,802 | 0,36434 | 1 |
| REGULATION_OF_RAS_GTPASE_ACTIVITY     | -0,009 | 0,803 | 0,46919 | 1 |
| WHITESIDE_CISPLATIN_RESISTANCE_UP     | 0,009  | 0,804 | 0,25792 | 1 |
| REACTOME_INFLAMMASOMES                | 0,009  | 0,805 | 0,97978 | 1 |
| ABDULRAHMAN_KIDNEY_CANCER_VHL_DN      | -0,009 | 0,806 | 0,87896 | 1 |
| ORGANELLE_OUTER_MEMBRANE              | 0,009  | 0,806 | 0,81557 | 1 |
| SU_LIVER                              | 0,009  | 0,808 | 0,13898 | 1 |
| RUTELLA_RESPONSE_TO_HGF_VS_CSF2RB_A   | -0,009 | 0,808 | 0,92273 | 1 |
| MODULE_58                             | 0,009  | 0,808 | 0,8     | 1 |
| MODULE_173                            | 0,009  | 0,808 | 0,29677 | 1 |
| CATION_TRANSPORTING_ATPASE_ACTIVITY   | 0,009  | 0,81  | 0,49001 | 1 |
| CORNIFIED_ENVELOPE                    | -0,009 | 0,81  | 0,14213 | 1 |
| WANG_ADIPOGENIC_GENES_REPRESSED_BY_S  | -0,009 | 0,811 | 0,72178 | 1 |
| ZHAN_EARLY_DIFFERENTIATION_GENES_UP   | 0,009  | 0,811 | 0,94283 | 1 |
| chr6q22                               | -0,009 | 0,812 | 0,96186 | 1 |
| RESPIRATORY_GASEOUS_EXCHANGE          | -0,009 | 0,812 | 0,52927 | 1 |
| REACTOME_ANTIGEN_PRESENTATION_FOLDIN  | -0,009 | 0,812 | 0,46736 | 1 |
| BERNARD_PPAPDC1B_TARGETS_UP           | -0,009 | 0,814 | 0,95106 | 1 |

|                                       |        |       |         |   |
|---------------------------------------|--------|-------|---------|---|
| RUAN_RESPONSE_TO_TROGLITAZONE_UP      | -0,009 | 0,815 | 0,17332 | 1 |
| GSE25087_FETAL_VS_ADULT_TCONV_DN      | -0,009 | 0,815 | 0,02384 | 1 |
| GNF2_TNFRSF1B                         | 0,009  | 0,816 | 0,86747 | 1 |
| MITOCHONDRIAL_MEMBRANE_PART           | -0,009 | 0,816 | 0,99786 | 1 |
| BROWN_MYELOID_CELL_DEVELOPMENT_UP     | -0,009 | 0,816 | 0,98705 | 1 |
| NAISHIRO_CTNNB1_TARGETS_WITH_LEF1_MC  | 0,009  | 0,816 | 0,67739 | 1 |
| GSE360_DC_VS_MAC_L_DONOVANI_DN        | 0,009  | 0,816 | 0,86908 | 1 |
| PID_P38ALPHABETADOWNSTREAMPATHWAY     | -0,008 | 0,817 | 0,31965 | 1 |
| MORF_UBE2A                            | -0,008 | 0,818 | 0,33769 | 1 |
| SINGH_NFE2L2_TARGETS                  | 0,008  | 0,818 | 0,07753 | 1 |
| SPERMATID_DIFFERENTIATION             | -0,008 | 0,819 | 0,12132 | 1 |
| RUAN_RESPONSE_TO_TNF_UP               | 0,008  | 0,82  | 0,69092 | 1 |
| MORF_JAG1                             | -0,008 | 0,821 | 0,04607 | 1 |
| REACTOME_CALNEXIN_CALRETICULIN_CYCLE  | 0,008  | 0,822 | 0,19954 | 1 |
| UNFOLDED_PROTEIN_RESPONSE             | -0,008 | 0,823 | 0,78157 | 1 |
| PROTEIN_POLYUBIQUITINATION            | 0,008  | 0,823 | 0,6565  | 1 |
| GSE3982_CTRL_VS_LPS_1H_NEUTROPHIL_UI  | 0,008  | 0,823 | 0,70804 | 1 |
| BARIS_THYROID_CANCER_UP               | -0,008 | 0,824 | 0,80113 | 1 |
| KEGG_PARKINSONS_DISEASE               | 0,008  | 0,824 | 0,68806 | 1 |
| GCM_CRKL                              | -0,008 | 0,827 | 0,8779  | 1 |
| RIGGINS_TAMOXIFEN_RESISTANCE_DN       | 0,008  | 0,827 | 0,03728 | 1 |
| MODULE_557                            | 0,008  | 0,828 | 0,3865  | 1 |
| MODULE_143                            | 0,008  | 0,828 | 0,63754 | 1 |
| REACTOME_MEMBRANE_TRAFFICKING         | 0,008  | 0,829 | 0,11952 | 1 |
| GSE6269_HEALTHY_VS_STREP_AUREUS_INF_  | -0,008 | 0,829 | 0,66141 | 1 |
| KIM_ALL_DISORDERS_OLIGODENDROCYTE_NU  | -0,008 | 0,83  | 0,74434 | 1 |
| ENDOTHELIAL_CELL_PROLIFERATION        | 0,008  | 0,83  | 0,56456 | 1 |
| NEGATIVE_REGULATION_OF_CYTOKINE_BIOSY | 0,008  | 0,83  | 0,72598 | 1 |
| PID_CERAMIDE_PATHWAY                  | -0,008 | 0,83  | 0,11404 | 1 |
| RUAN_RESPONSE_TO_TNF_TROGLITAZONE_U   | 0,008  | 0,831 | 0,70328 | 1 |
| HOSHIDA_LIVER_CANCER_SUBCLASS_S3      | 0,008  | 0,832 | 0,31297 | 1 |
| BIOCARTA_KREB_PATHWAY                 | -0,008 | 0,834 | 0,12826 | 1 |
| PHOSPHATASE_BINDING                   | 0,008  | 0,834 | 0,71755 | 1 |
| MOSERLE_IFNA_RESPONSE                 | -0,008 | 0,835 | 0,86899 | 1 |
| PHOSPHOTRANSFERASE_ACTIVITY_PHOSPAT   | 0,008  | 0,836 | 0,06432 | 1 |
| MIKKELSEN_ES_HCP_WITH_H3K27ME3        | -0,008 | 0,836 | 0,27194 | 1 |
| IGARASHI_ATF4_TARGETS_DN              | -0,007 | 0,839 | 0,53548 | 1 |
| GSE22886_NEUTROPHIL_VS_DC_DN          | -0,007 | 0,839 | 0,15545 | 1 |
| MODULE_505                            | 0,007  | 0,839 | 0,98287 | 1 |
| REGULATION_OF_TRANSCRIPTION_FACTOR_A  | -0,007 | 0,84  | 0,33574 | 1 |
| KEGG_MATURITY_ONSET_DIABETES_OF_THE_  | 0,007  | 0,84  | 0,91687 | 1 |
| BIOCARTA GRANULOCYTES_PATHWAY         | -0,007 | 0,84  | 0,8234  | 1 |

|                                       |        |       |         |   |
|---------------------------------------|--------|-------|---------|---|
| MEISSNER_ES_ICP_WITH_H3K4ME3          | -0,007 | 0,841 | 0,06357 | 1 |
| GSE11057_CD4_CENT_MEM_VS_PBMC_DN      | 0,007  | 0,841 | 0,87914 | 1 |
| CROONQUIST_NRAS_SIGNALING_UP          | 0,007  | 0,842 | 0,91618 | 1 |
| PIGMENT_METABOLIC_PROCESS             | -0,007 | 0,842 | 0,48995 | 1 |
| CAMPS_COLON_CANCER_COPY_NUMBER_UP     | -0,007 | 0,843 | 0,28427 | 1 |
| GSE2706_LPS_VS_R848_AND_LPS_8H_STIM   | -0,007 | 0,844 | 0,68329 | 1 |
| KEGG_ASTHMA                           | -0,007 | 0,844 | 0,55314 | 1 |
| ANION_CATION_SYMPORTER_ACTIVITY       | -0,007 | 0,844 | 0,30189 | 1 |
| BOWIE_RESPONSE_TO_EXTRACELLULAR_MAT   | 0,007  | 0,845 | 0,74953 | 1 |
| BOHN_PRIMARY_IMMUNODEFICIENCY_SYNDRO  | 0,007  | 0,845 | 0,90365 | 1 |
| JISON_SICKLE_CELL_DISEASE_UP          | -0,007 | 0,845 | 0,99423 | 1 |
| IKEDA_MIR1_TARGETS_DN                 | -0,007 | 0,846 | 0,49853 | 1 |
| REACTOME_ABC_FAMILY_PROTEINS_MEDIATE  | -0,007 | 0,846 | 0,00763 | 1 |
| RUAN_RESPONSE_TO_TNF_TROGLITAZONE_D   | -0,007 | 0,847 | 0,09961 | 1 |
| KEGG_FATTY_ACID_METABOLISM            | -0,007 | 0,848 | 0,10401 | 1 |
| ANTIOXIDANT_ACTIVITY                  | 0,007  | 0,848 | 0,78097 | 1 |
| GSE13485_DAY1_VS_DAY21_YF17D_VACCII   | -0,007 | 0,849 | 0,67457 | 1 |
| REACTOME_DEFENSINS                    | -0,007 | 0,849 | 0,93378 | 1 |
| OXIDOREDUCTASE_ACTIVITY_ACTING_ON_TH  | 0,007  | 0,849 | 0,32548 | 1 |
| FOCAL_ADHESION                        | 0,007  | 0,849 | 0,76298 | 1 |
| INTERCELLULAR_JUNCTION_ASSEMBLY_AND_  | -0,007 | 0,85  | 0,19955 | 1 |
| KAAB_FAILED_HEART_ATRIUM_UP           | -0,007 | 0,85  | 0,29858 | 1 |
| MYLLYKANGAS_AMPLIFICATION_HOT_SPOT_5  | -0,007 | 0,85  | 0,0937  | 1 |
| EINAV_INTERFERON_SIGNATURE_IN_CANCER  | -0,007 | 0,851 | 0,85126 | 1 |
| INORGANIC_CATION_TRANSMEMBRANE_TRAN   | 0,007  | 0,852 | 0,95177 | 1 |
| GSE24634_TEFF_VS_TCONV_DAY10_IN_CUL   | 0,007  | 0,852 | 0,68055 | 1 |
| CELL_SUBSTRATE_ADHERENS_JUNCTION      | -0,007 | 0,853 | 0,45997 | 1 |
| chr20q11                              | 0,007  | 0,853 | 0,73645 | 1 |
| GCM_SUFU                              | 0,007  | 0,853 | 0,6411  | 1 |
| OUYANG_PROSTATE_CANCER_MARKERS        | 0,007  | 0,853 | 0,00318 | 1 |
| BIOCARTA_HCMV_PATHWAY                 | -0,007 | 0,855 | 0,82392 | 1 |
| SCHUHMACHER_MYC_TARGETS_DN            | -0,007 | 0,856 | 0,48269 | 1 |
| BILE_ACID_METABOLIC_PROCESS           | -0,007 | 0,856 | 0,89919 | 1 |
| RESPONSE_TO_EXTRACELLULAR_STIMULUS    | 0,007  | 0,857 | 0,04324 | 1 |
| ORGANIC_ACID_TRANSPORT                | 0,007  | 0,858 | 0,7987  | 1 |
| chr5p14                               | -0,007 | 0,858 | 0,22616 | 1 |
| REACTOME_MITOCHONDRIAL_PROTEIN_IMPORT | -0,007 | 0,859 | 0,60564 | 1 |
| REACTOME_BMAL1_CLOCK_NPAS2_ACTIVAT    | -0,007 | 0,859 | 0,26851 | 1 |
| CAFFAREL_RESPONSE_TO_THC_8HR_5_UP     | 0,006  | 0,86  | 0,87005 | 1 |
| GRABARCZYK_BCL11B_TARGETS_UP          | -0,006 | 0,86  | 0,67165 | 1 |
| STEROL_BINDING                        | 0,006  | 0,86  | 0,22387 | 1 |
| PROTEIN_AUTOPROCESSING                | -0,006 | 0,861 | 0,43692 | 1 |

|                                       |        |       |         |   |
|---------------------------------------|--------|-------|---------|---|
| MODULE_294                            | -0,006 | 0,861 | 0,13079 | 1 |
| COATES_MACROPHAGE_M1_VS_M2_DN         | -0,006 | 0,862 | 0,87908 | 1 |
| HOFMANN_MYELODYSPLASTIC_SYNDROM_RIS   | 0,006  | 0,863 | 0,41739 | 1 |
| MODULE_464                            | -0,006 | 0,863 | 0,21082 | 1 |
| VOLTAGE_GATED_CALCIIUM_CHANNEL_ACTIV  | 0,006  | 0,863 | 0,01181 | 1 |
| REACTOME_ACTIVATED_AMPK_STIMULATES_   | -0,006 | 0,863 | 0,15808 | 1 |
| ERB2_UP.V1_UP                         | -0,006 | 0,863 | 0,86503 | 1 |
| TBK1.DN.48HRS_DN                      | 0,006  | 0,863 | 0,26572 | 1 |
| chr4p16                               | -0,006 | 0,864 | 0,00848 | 1 |
| HOWLIN_CITED1_TARGETS_2_UP            | -0,006 | 0,865 | 0,26373 | 1 |
| SCHRAMM_INHBA_TARGETS_UP              | -0,006 | 0,865 | 0,34111 | 1 |
| GNF2_MYL2                             | 0,006  | 0,865 | 0,38322 | 1 |
| COFACTOR_CATABOLIC_PROCESS            | 0,006  | 0,865 | 0,90499 | 1 |
| REACTOME_INCRETIN_SYNTHESIS_SECRETION | 0,006  | 0,867 | 0,74517 | 1 |
| KEGG_CARDIAC_MUSCLE_CONTRACTION       | 0,006  | 0,868 | 0,10265 | 1 |
| REACTOME_GLYCOGEN_BREAKDOWN_GLYCOG    | 0,006  | 0,868 | 0,59978 | 1 |
| KORKOLA_TERATOMA_UP                   | 0,006  | 0,868 | 0,86953 | 1 |
| VACUOLAR_MEMBRANE                     | -0,006 | 0,868 | 0,90522 | 1 |
| GSE37416_CTRL_VS_3H_F_TULARENSIS_LV!  | -0,006 | 0,868 | 0,24734 | 1 |
| SUGAR_BINDING                         | -0,006 | 0,868 | 0,49233 | 1 |
| BIOCARTA_EGFR_SMRTE_PATHWAY           | 0,006  | 0,869 | 0,10026 | 1 |
| MODULE_327                            | 0,006  | 0,869 | 0,2931  | 1 |
| NUCLEOBASENUCLEOSIDENUCLEOTIDE_KINASI | 0,006  | 0,869 | 0,11917 | 1 |
| UBIQUITIN_PROTEIN_LIGASE_ACTIVITY     | -0,006 | 0,87  | 0,46048 | 1 |
| REACTOME_GLUTATHIONE_CONJUGATION      | -0,006 | 0,87  | 0,73977 | 1 |
| REACTOME_CYTOSOLIC_SULFONATION_OF_SI  | -0,006 | 0,871 | 0,85005 | 1 |
| KEGG_STARCH_AND_SUCROSE_METABOLISM    | 0,006  | 0,871 | 0,48552 | 1 |
| RODRIGUES_DCC_TARGETS_DN              | -0,006 | 0,872 | 0,1165  | 1 |
| DIERICK_SEROTONIN_FUNCTION_GENES      | 0,006  | 0,873 | 0,27199 | 1 |
| chr2p14                               | 0,006  | 0,873 | 0,58837 | 1 |
| GCM_CALM1                             | -0,006 | 0,874 | 0,31725 | 1 |
| DELLA_RESPONSE_TO_TSA_AND_BUTYRATE    | 0,006  | 0,874 | 0,87565 | 1 |
| SA_MMP_CYTOKINE_CONNECTION            | -0,006 | 0,875 | 0,91644 | 1 |
| REGULATION_OF_I_KAPPAB_KINASE_NF_KAP  | -0,006 | 0,876 | 0,51643 | 1 |
| AGTGCGT,MIR-521                       | -0,006 | 0,876 | 0,40574 | 1 |
| SUZUKI_RESPONSE_TO_TSA                | 0,006  | 0,876 | 0,76099 | 1 |
| CROONQUIST_IL6_DEPRIVATION_UP         | 0,006  | 0,876 | 0,19253 | 1 |
| REACTOME_PKA_MEDIATED_PHOSPHORYLATI   | 0,006  | 0,877 | 0,05708 | 1 |
| BENNETT_SYSTEMIC_LUPUS_ERYTHEMATOSU!  | -0,006 | 0,877 | 0,65141 | 1 |
| RAMJAUN_APOPTOSIS_BY_TGFB1_VIA_MAPK   | 0,006  | 0,879 | 0,86923 | 1 |
| PARK_HSC_VS_MULTIPOTENT_PROGENITORS_  | 0,006  | 0,88  | 0,88373 | 1 |
| STEARMAN_LUNG_CANCER_EARLY_VS_LATE.   | 0,006  | 0,88  | 0,98797 | 1 |

|                                      |        |       |         |   |
|--------------------------------------|--------|-------|---------|---|
| KEGG_GLUTATHIONE_METABOLISM          | -0,006 | 0,88  | 0,75543 | 1 |
| V\$SEF1_C                            | -0,006 | 0,881 | 0,73397 | 1 |
| PID_HIF2PATHWAY                      | -0,006 | 0,881 | 0,60533 | 1 |
| RUAN_RESPONSE_TO_TNF_DN              | 0,005  | 0,881 | 0,2343  | 1 |
| chr2q34                              | -0,005 | 0,882 | 0,15305 | 1 |
| chr3q                                | -0,005 | 0,882 | 0,96216 | 1 |
| VITAMIN_BINDING                      | 0,005  | 0,882 | 0,46912 | 1 |
| MODULE_306                           | 0,005  | 0,882 | 0,07646 | 1 |
| MITOCHONDRIAL_SMALL_RIBOSOMAL_SUBUN  | -0,005 | 0,882 | 0,66333 | 1 |
| ORGANELLAR_SMALL_RIBOSOMAL_SUBUNIT   | -0,005 | 0,882 | 0,66333 | 1 |
| SMALL_RIBOSOMAL_SUBUNIT              | -0,005 | 0,882 | 0,66333 | 1 |
| GSE27786_LIN_NEG_VS_NKCELL_DN        | -0,005 | 0,882 | 0,0563  | 1 |
| SMAD_BINDING                         | 0,005  | 0,882 | 0,0905  | 1 |
| GSE17721_PAM3CSK4_VS_GADIQUIMOD_2H   | -0,005 | 0,884 | 0,27477 | 1 |
| GSE2706_2H_VS_8H_R848_AND_LPS_STIM   | 0,005  | 0,884 | 0,58099 | 1 |
| REACTOME_RECYCLING_OF_BILE_ACIDS_AND | 0,005  | 0,885 | 0,69568 | 1 |
| GSE360_CTRL_VS_T_GONDII_MAC_UP       | -0,005 | 0,888 | 0,54989 | 1 |
| PID_HNF3BPATHWAY                     | -0,005 | 0,888 | 0,00488 | 1 |
| REACTOME_METABOLISM_OF_VITAMINS_AND  | 0,005  | 0,889 | 0,10277 | 1 |
| COPPER_ION_BINDING                   | 0,005  | 0,889 | 0,44981 | 1 |
| chr16p                               | 0,005  | 0,89  | 0,73653 | 1 |
| BOGNI_TREATMENT_RELATED_MYELOID_LEUK | 0,005  | 0,89  | 0,13388 | 1 |
| MORF_RAB1A                           | 0,005  | 0,891 | 0,11179 | 1 |
| SMALL_CONJUGATING_PROTEIN_LIGASE_ACT | -0,005 | 0,893 | 0,4763  | 1 |
| KEGG_PRIMARY_BILE_ACID_BIOSYNTHESIS  | -0,005 | 0,893 | 0,37435 | 1 |
| MCCABE_HOXC6_TARGETS_CANCER_DN       | -0,005 | 0,893 | 0,22931 | 1 |
| WANG_BARRETTES_ESOPHAGUS_AND_ESOPHA  | 0,005  | 0,893 | 0,24563 | 1 |
| GSE17721_CTRL_VS_LPS_4H_BMDM_UP      | -0,005 | 0,893 | 0,18656 | 1 |
| SEIKE_LUNG_CANCER_POOR_SURVIVAL      | -0,005 | 0,893 | 0,38097 | 1 |
| HEDENFALK_BREAST_CANCER_BRACX_DN     | -0,005 | 0,893 | 0,50593 | 1 |
| RAY_ALZHEIMERS_DISEASE               | -0,005 | 0,894 | 0,29327 | 1 |
| SUPEROXIDE_METABOLIC_PROCESS         | 0,005  | 0,894 | 0,974   | 1 |
| GLUCAN_METABOLIC_PROCESS             | -0,005 | 0,896 | 0,49518 | 1 |
| U12_DEPENDENT_SPLICEOSOME            | 0,005  | 0,897 | 0,98791 | 1 |
| CHESLER_BRAIN_QTL_TRANS              | -0,005 | 0,898 | 0,51219 | 1 |
| GSE22886_NAIVE_BCELL_VS_NEUTROPHIL_C | -0,005 | 0,901 | 0,6307  | 1 |
| GNF2_TYK2                            | -0,005 | 0,901 | 0,76671 | 1 |
| BIOCARTA_GATA3_PATHWAY               | 0,005  | 0,902 | 0,2512  | 1 |
| LIU_BREAST_CANCER                    | 0,004  | 0,903 | 0,80812 | 1 |
| BIOCARTA_NUCLEARRS_PATHWAY           | -0,004 | 0,904 | 0,14542 | 1 |
| PROTEIN_METHYLTRANSFERASE_ACTIVITY   | 0,004  | 0,905 | 0,19295 | 1 |
| GSE17721_0.5H_VS_8H_PAM3CSK4_BMDM_   | -0,004 | 0,906 | 0,08821 | 1 |



|                                      |        |       |         |   |
|--------------------------------------|--------|-------|---------|---|
| GCM_BCL2L1                           | -0,004 | 0,907 | 0,89038 | 1 |
| GNF2_ANK1                            | 0,004  | 0,907 | 0,94724 | 1 |
| GNF2_SPTB                            | 0,004  | 0,907 | 0,94724 | 1 |
| SPERMATID_DEVELOPMENT                | 0,004  | 0,909 | 0,22179 | 1 |
| REACTOME_PHOSPHOLIPID_METABOLISM     | -0,004 | 0,909 | 0,11013 | 1 |
| GSE11864_CSF1_VS_CSF1_PAM3CYS_IN_MA  | 0,004  | 0,909 | 0,22337 | 1 |
| CELLULAR_LIPID_CATABOLIC_PROCESS     | 0,004  | 0,909 | 0,55646 | 1 |
| KEGG_SELENOAMINO_ACID_METABOLISM     | 0,004  | 0,91  | 0,48457 | 1 |
| STEIN_ESTROGEN_RESPONSE_NOT_VIA_ESRR | 0,004  | 0,91  | 0,00045 | 1 |
| PROTEIN_SECRETION                    | 0,004  | 0,91  | 0,32492 | 1 |
| SUGAR_TRANSMEMBRANE_TRANSPORTER_AC   | -0,004 | 0,911 | 0,36024 | 1 |
| NOUZOVA_TRETINOIN_AND_H4_ACETYLATIO  | -0,004 | 0,911 | 0,97618 | 1 |
| GROSS_HYPOXIA_VIA_HIF1A_ONLY         | 0,004  | 0,912 | 0,321   | 1 |
| REACTOME_IL1_SIGNALING               | -0,004 | 0,912 | 0,55929 | 1 |
| GNF2_MYL3                            | -0,004 | 0,912 | 0,26157 | 1 |
| BOYALT_LIVER_CANCER_SUBCLASS_G6_DN   | 0,004  | 0,912 | 0,50719 | 1 |
| REACTOME_TRYPTOPHAN_CATABOLISM       | -0,004 | 0,912 | 0,28243 | 1 |
| PARK_TRETINOIN_RESPONSE_AND_PML_RAR/ | 0,004  | 0,912 | 0,87027 | 1 |
| KEGG_METABOLISM_OF_XENOBIOTICS_BY_CY | 0,004  | 0,913 | 0,95739 | 1 |
| MITOCHONDRION                        | -0,004 | 0,913 | 0,55333 | 1 |
| FARMER_BREAST_CANCER_APOCRINE_VS_LU  | -0,004 | 0,913 | 0,12954 | 1 |
| ENDOPLASMIC_RETICULUM_MEMBRANE       | 0,004  | 0,913 | 0,47853 | 1 |
| GCM_RAB10                            | -0,004 | 0,913 | 0,86991 | 1 |
| RUNNE_GENDER_EFFECT_UP               | 0,004  | 0,914 | 0,43219 | 1 |
| GSE3982_DC_VS_TH1_UP                 | 0,004  | 0,914 | 0,79022 | 1 |
| MORF_DAP                             | -0,004 | 0,914 | 0,25192 | 1 |
| AMINO_ACID_METABOLIC_PROCESS         | 0,004  | 0,915 | 0,3036  | 1 |
| MATTIOLI_MGUS_VS_MULTIPLE_MYELOMA    | -0,004 | 0,916 | 0,44168 | 1 |
| BOYALT_LIVER_CANCER_SUBCLASS_G3_DN   | 0,004  | 0,916 | 0,06426 | 1 |
| GNF2_FOS                             | 0,004  | 0,918 | 0,69185 | 1 |
| MODULE_424                           | 0,004  | 0,918 | 0,60783 | 1 |
| NUCLEOTIDE_KINASE_ACTIVITY           | -0,004 | 0,919 | 0,05213 | 1 |
| AIYAR_COBRA1_TARGETS_UP              | 0,004  | 0,919 | 0,18216 | 1 |
| REACTOME_RORA_ACTIVATES_CIRCADIAN_EX | 0,004  | 0,92  | 0,93337 | 1 |
| PEDERSEN_METASTASIS_BY_ERBB2_ISOFORM | 0,004  | 0,92  | 0,49203 | 1 |
| COFACTOR_METABOLIC_PROCESS           | 0,004  | 0,921 | 0,34667 | 1 |
| UROSEVIC_RESPONSE_TO_IMIQIMOD        | 0,004  | 0,921 | 0,71602 | 1 |
| GSE24634_TEFF_VS_TCONV_DAY7_IN_CULT  | 0,004  | 0,921 | 0,95744 | 1 |
| CGGAARNGGCNG_UNKNOWN                 | 0,004  | 0,922 | 0,14884 | 1 |
| OXFORD_RALA_AND_RALB_TARGETS_DN      | -0,004 | 0,922 | 0,60706 | 1 |
| GSE6269_HEALTHY_VS_STREP_PNEUMO_INF  | -0,004 | 0,923 | 0,74687 | 1 |
| BIOCARTA_ARAP_PATHWAY                | 0,004  | 0,923 | 0,46419 | 1 |

|                                        |        |       |         |   |
|----------------------------------------|--------|-------|---------|---|
| WANG_IMMORTALIZED_BY_HOXA9_AND_MEIS    | -0,004 | 0,924 | 0,6635  | 1 |
| GNF2_TAL1                              | 0,003  | 0,925 | 0,96083 | 1 |
| FRASOR_RESPONSE_TO_SERM_OR_FULVESTR    | -0,003 | 0,926 | 0,40578 | 1 |
| SPIELMAN_LYMPHOBLAST_EUROPEAN_VS_AS    | -0,003 | 0,926 | 0,81566 | 1 |
| MITOCHONDRIAL_RIBOSOME                 | -0,003 | 0,926 | 0,75703 | 1 |
| ORGANELLAR_RIBOSOME                    | -0,003 | 0,926 | 0,75703 | 1 |
| chrXq28                                | -0,003 | 0,926 | 0,13947 | 1 |
| KEGG_GLYCINE_SERINE_AND_THREONINE_ME   | 0,003  | 0,926 | 0,62338 | 1 |
| MULLIGHAN_MLL_SIGNATURE_2_UP           | -0,003 | 0,927 | 0,49612 | 1 |
| ZHENG_FOXP3_TARGETS_IN_THYMUS_DN       | 0,003  | 0,927 | 0,00366 | 1 |
| REACTOME_MAPK_TARGETS_NUCLEAR_EVEN     | 0,003  | 0,928 | 0,65672 | 1 |
| MODULE_402                             | -0,003 | 0,928 | 0,5389  | 1 |
| GSE10325_BCELL_VS_MYELOID_DN           | 0,003  | 0,928 | 0,9618  | 1 |
| GSE360_T_GONDII_VS_B_MALAYI_HIGH_DOS   | 0,003  | 0,93  | 0,34116 | 1 |
| chrXq24                                | 0,003  | 0,93  | 0,3937  | 1 |
| IIZUKA_LIVER_CANCER_PROGRESSION_G2_G3  | -0,003 | 0,931 | 0,6198  | 1 |
| GSE24634_TREG_VS_TCONV_POST_DAY10_     | 0,003  | 0,931 | 0,72805 | 1 |
| REACTOME_ACYL_CHAIN_REMODELLING_OF_    | 0,003  | 0,932 | 0,2987  | 1 |
| MODULE_194                             | -0,003 | 0,932 | 0,26483 | 1 |
| SEIDEN_MET_SIGNALING                   | 0,003  | 0,932 | 0,79323 | 1 |
| GSE3982_DC_VS_CENT_MEMORY_CD4_TCEL     | 0,003  | 0,932 | 0,9504  | 1 |
| REACTOME_CITRIC_ACID_CYCLE_TCA_CYCLE   | 0,003  | 0,933 | 0,12628 | 1 |
| MODULE_247                             | 0,003  | 0,933 | 0,82745 | 1 |
| TRANS_GOLGI_NETWORK                    | -0,003 | 0,935 | 0,79155 | 1 |
| PROTEIN_AMINO_ACID_O_LINKED_GLYCOSYL   | -0,003 | 0,935 | 0,21864 | 1 |
| GNF2_LYN                               | -0,003 | 0,935 | 0,79441 | 1 |
| IIZUKA_LIVER_CANCER_PROGRESSION_L1_G1  | -0,003 | 0,936 | 0,44108 | 1 |
| ACOSTA_PROLIFERATION_INDEPENDENT_MYC   | -0,003 | 0,936 | 0,5027  | 1 |
| MATZUK_PREOVULATORY_FOLLICLE           | 0,003  | 0,938 | 0,00639 | 1 |
| POSITIVE_REGULATION_OF_PROTEIN_SECRETI | 0,003  | 0,938 | 0,49828 | 1 |
| LTE2_UP.V1_UP                          | 0,003  | 0,938 | 0,93367 | 1 |
| BIOCARTA_IL5_PATHWAY                   | -0,003 | 0,938 | 0,98019 | 1 |
| GSE24634_TREG_VS_TCONV_POST_DAY5_IL    | 0,003  | 0,938 | 0,87323 | 1 |
| POSITIVE_REGULATION_OF_CYTOKINE_SECRE  | 0,003  | 0,939 | 0,50144 | 1 |
| KEGG_BETA_ALANINE_METABOLISM           | -0,003 | 0,939 | 0,32838 | 1 |
| GSE17721_CTRL_VS_PAM3CSK4_1H_BMDM_     | 0,003  | 0,94  | 0,78197 | 1 |
| FAELT_B_CLL_WITH_VH3_21_DN             | -0,003 | 0,94  | 0,74658 | 1 |
| HUMMEL_BURKITTTS_LYMPHOMA_DN           | 0,003  | 0,941 | 0,98643 | 1 |
| CARBOXYLIC_ACID_TRANSPORT              | 0,003  | 0,941 | 0,88455 | 1 |
| LINDGREN_BLADDER_CANCER_WITH_LOH_IN_   | -0,003 | 0,942 | 0,19246 | 1 |
| MODULE_416                             | 0,003  | 0,942 | 0,36737 | 1 |
| RESPONSE_TO_ORGANIC_SUBSTANCE          | 0,003  | 0,942 | 0,61088 | 1 |

|                                       |        |       |         |   |
|---------------------------------------|--------|-------|---------|---|
| REACTOME_CIRCADIAN_CLOCK              | -0,003 | 0,942 | 0,26128 | 1 |
| HUMMERICH_BENIGN_SKIN_TUMOR_DN        | -0,003 | 0,942 | 0,35967 | 1 |
| WENG_POR_TARGETS_GLOBAL_DN            | 0,003  | 0,942 | 0,32696 | 1 |
| REACTOME_TRAF6_MEDIATED_IRF7_ACTIVAT  | -0,003 | 0,942 | 0,97987 | 1 |
| BIOCARTA_IL10_PATHWAY                 | -0,003 | 0,943 | 0,96964 | 1 |
| EARLY_ENDOSOME                        | -0,003 | 0,943 | 0,48307 | 1 |
| DAZARD_UV_RESPONSE_CLUSTER_G1         | -0,003 | 0,943 | 0,84962 | 1 |
| DEFENSE_RESPONSE_TO_VIRUS             | 0,003  | 0,943 | 0,66672 | 1 |
| MOOTHA_HUMAN_MITODB_6_2002            | 0,003  | 0,943 | 0,93889 | 1 |
| chr5p13                               | -0,003 | 0,943 | 0,16276 | 1 |
| REACTOME_RNA_POL_I_TRANSCRIPTION_INIT | -0,003 | 0,945 | 0,85105 | 1 |
| KEGG_TYPE_I_DIABETES_MELLITUS         | -0,002 | 0,946 | 0,89608 | 1 |
| GSE24634_IL4_VS_CTRL_TREATED_NAIVE_C  | -0,002 | 0,946 | 0,42952 | 1 |
| PROTEIN_OLIGOMERIZATION               | 0,002  | 0,947 | 0,15967 | 1 |
| GNF2_IGF1                             | -0,002 | 0,947 | 0,2525  | 1 |
| REGULATION_OF_GTPASE_ACTIVITY         | 0,002  | 0,948 | 0,6032  | 1 |
| GSE37416_12H_VS_24H_F_TULARENSIS_LV   | 0,002  | 0,949 | 0,58612 | 1 |
| MORF_PRKAR1A                          | 0,002  | 0,949 | 0,16155 | 1 |
| NIKOLSKY_BREAST_CANCER_22Q13_AMPLICI  | -0,002 | 0,949 | 0,9071  | 1 |
| LIPID_CATABOLIC_PROCESS               | 0,002  | 0,95  | 0,31776 | 1 |
| GNF2_CEBPA                            | 0,002  | 0,95  | 0,22776 | 1 |
| TERAO_AOX4_TARGETS_HG_UP              | -0,002 | 0,95  | 0,49284 | 1 |
| RNA_POLYMERASE_II_TRANSCRIPTION_FACTC | -0,002 | 0,95  | 0,62019 | 1 |
| GSE2706_UNSTIM_VS_8H_R848_DC_UP       | 0,002  | 0,95  | 0,067   | 1 |
| GARCIA_TARGETS_OF_FLI1_AND_DAX1_UP    | 0,002  | 0,951 | 0,00972 | 1 |
| OKAMOTO_LIVER_CANCER_MULTICENTRIC_OC  | 0,002  | 0,952 | 0,7564  | 1 |
| TESAR_JAK_TARGETS_MOUSE_ES_D3_UP      | 0,002  | 0,952 | 0,5069  | 1 |
| REACTOME_BETA_DEFENSINS               | -0,002 | 0,952 | 0,94201 | 1 |
| REACTOME_TRAF3_DEPENDENT_IRF_ACTIVA1  | 0,002  | 0,954 | 0,84109 | 1 |
| GSE360_HIGH_DOSE_B_MALAYI_VS_M_TUBE   | -0,002 | 0,955 | 0,57945 | 1 |
| MIKKELSEN_MEF_LCP_WITH_H3K27ME3       | 0,002  | 0,955 | 0,08776 | 1 |
| KORKOLA_EMBRYONAL_CARCINOMA_DN        | 0,002  | 0,957 | 0,27742 | 1 |
| SECRETION                             | -0,002 | 0,957 | 0,15773 | 1 |
| GSE29618_MONOCYTE_VS_PDC_DAY7_FLU_    | -0,002 | 0,957 | 0,99881 | 1 |
| FARDIN_HYPOXIA_9                      | 0,002  | 0,958 | 0,04539 | 1 |
| POSITIVE_REGULATION_OF_MAPKKK_CASCAD  | 0,002  | 0,958 | 0,14616 | 1 |
| BRUSH_BORDER                          | -0,002 | 0,959 | 0,44219 | 1 |
| MODULE_243                            | -0,002 | 0,959 | 0,00408 | 1 |
| GSE29618_MONOCYTE_VS_MDC_UP           | 0,002  | 0,959 | 0,78112 | 1 |
| CYTOKINE_SECRETION                    | 0,002  | 0,96  | 0,28581 | 1 |
| REACTOME_OPSINS                       | -0,002 | 0,96  | 0,22028 | 1 |
| BEIER_GLIOMA_STEM_CELL_DN             | -0,002 | 0,96  | 0,3023  | 1 |

|                                       |        |       |         |   |
|---------------------------------------|--------|-------|---------|---|
| REACTOME_BASE_FREE_SUGAR_PHOSPHATE_   | -0,002 | 0,961 | 0,32    | 1 |
| ACID_AMINO_ACID_LIGASE_ACTIVITY       | 0,002  | 0,962 | 0,78025 | 1 |
| REACTOME_SYNTHESIS_AND_INTERCONVERSI  | -0,002 | 0,963 | 0,52315 | 1 |
| ACUTE_INFLAMMATORY_RESPONSE           | 0,002  | 0,964 | 0,39092 | 1 |
| GSE10325_CD4_TCELL_VS_MYELOID_DN      | -0,002 | 0,964 | 0,95041 | 1 |
| GSE9037_CTRL_VS_LPS_4H_STIM_BMDM_UP   | -0,002 | 0,964 | 0,09401 | 1 |
| GSE2706_2H_VS_8H_R848_STIM_DC_UP      | 0,002  | 0,964 | 0,19334 | 1 |
| GSE17721_CTRL_VS_LPS_8H_BMDM_UP       | 0,002  | 0,965 | 0,26171 | 1 |
| ZEMBUTSU_SENSITIVITY_TO_DOXORUBICIN   | 0,002  | 0,965 | 0,70171 | 1 |
| NEGATIVE_REGULATION_OF_TRANSCRIPTION_ | 0,002  | 0,966 | 0,83091 | 1 |
| NEGATIVE_REGULATION_OF_CYTOSKELETON_  | -0,002 | 0,966 | 0,50768 | 1 |
| ESTABLISHMENT_OF_VESICLE_LOCALIZATION | -0,002 | 0,966 | 0,25069 | 1 |
| MODULE_539                            | -0,002 | 0,966 | 0,68937 | 1 |
| IIZUKA_LIVER_CANCER_PROGRESSION_G1_G2 | 0,002  | 0,967 | 0,72172 | 1 |
| KEGG_VASOPRESSIN_REGULATED_WATER_RE   | 0,001  | 0,967 | 0,70912 | 1 |
| GSE17721_CTRL_VS_CPG_6H_BMDM_UP       | -0,001 | 0,968 | 0,08003 | 1 |
| YAO_TEMPORAL_RESPONSE_TO_PROGESTERC   | 0,001  | 0,968 | 0,47544 | 1 |
| GSE29618_BCELL_VS_MONOCYTE_DN         | 0,001  | 0,969 | 0,91768 | 1 |
| MODULE_239                            | -0,001 | 0,969 | 0,70196 | 1 |
| MORF_PRKACA                           | -0,001 | 0,97  | 0,06493 | 1 |
| GSE11924_TFH_VS_TH17_CD4_TCELL_UP     | 0,001  | 0,97  | 0,01409 | 1 |
| PAPASPYRIDONOS_UNSTABLE_ATEROSCLERO   | -0,001 | 0,971 | 0,54503 | 1 |
| MODULE_373                            | 0,001  | 0,971 | 0,18747 | 1 |
| MONOCARBOXYLIC_ACID_TRANSPORT         | 0,001  | 0,971 | 0,56003 | 1 |
| MODULE_407                            | 0,001  | 0,971 | 0,16812 | 1 |
| BOWIE_RESPONSE_TO_TAMOXIFEN           | 0,001  | 0,971 | 0,89827 | 1 |
| chr5q35                               | 0,001  | 0,972 | 0,38766 | 1 |
| MODULE_285                            | -0,001 | 0,972 | 0,22536 | 1 |
| OXYGEN_AND_REACTIVE_OXYGEN_SPECIES_M  | 0,001  | 0,972 | 0,45463 | 1 |
| WAMUNYOKOLI_OVARIAN_CANCER_LMP_UP     | -0,001 | 0,973 | 0,33224 | 1 |
| chr6q23                               | 0,001  | 0,973 | 0,71156 | 1 |
| REACTOME_TRAF6_MEDIATED_INDUCTION_OF  | 0,001  | 0,974 | 0,91689 | 1 |
| AMIT_SERUM_RESPONSE_20_MCF10A         | 0,001  | 0,975 | 0,09628 | 1 |
| ADHERENS_JUNCTION                     | -0,001 | 0,975 | 0,366   | 1 |
| FOCAL_ADHESION_FORMATION              | -0,001 | 0,975 | 0,52304 | 1 |
| REACTOME_MEMBRANE_BINDING_AND_TARGE   | -0,001 | 0,976 | 0,71315 | 1 |
| chr5q21                               | -0,001 | 0,976 | 0,12887 | 1 |
| GNF2_FGR                              | -0,001 | 0,978 | 0,99739 | 1 |
| BERGER_MBD2_TARGETS                   | 1E-03  | 0,978 | 0,32985 | 1 |
| REGULATION_OF_CYTOKINE_SECRETION      | 9E-04  | 0,98  | 0,24065 | 1 |
| VACUOLAR_PART                         | -9E-04 | 0,98  | 0,8401  | 1 |
| OLSSON_E2F3_TARGETS_UP                | 9E-04  | 0,98  | 0,82411 | 1 |

|                                      |        |       |         |   |
|--------------------------------------|--------|-------|---------|---|
| chr1q41                              | 9E-04  | 0,981 | 0,65644 | 1 |
| REACTOME_RAP1_SIGNALLING             | -9E-04 | 0,981 | 0,42638 | 1 |
| WANG_RESPONSE_TO_GSK3_INHIBITOR_SB21 | -9E-04 | 0,981 | 0,30014 | 1 |
| STEROID_HORMONE_RECEPTOR_ACTIVITY    | 8E-04  | 0,982 | 0,03581 | 1 |
| REACTOME_SIGNAL_ATTENUATION          | 8E-04  | 0,983 | 0,04632 | 1 |
| GCM_ING1                             | 7E-04  | 0,984 | 0,44507 | 1 |
| KANNAN_TP53_TARGETS_UP               | 7E-04  | 0,985 | 0,10998 | 1 |
| chr9p23                              | 6E-04  | 0,986 | 0,83868 | 1 |
| DISTECHE_ESCAPED_FROM_X_INACTIVATION | -6E-04 | 0,987 | 0,69513 | 1 |
| BANDRES_RESPONSE_TO_CARMUSTIN_MGMT.  | 6E-04  | 0,987 | 0,62126 | 1 |
| KEGG_PENTOSE_PHOSPHATE_PATHWAY       | -6E-04 | 0,988 | 0,14006 | 1 |
| MODULE_4                             | -6E-04 | 0,988 | 0,43384 | 1 |
| MORF_MYC                             | 5E-04  | 0,988 | 0,05513 | 1 |
| MITOCHONDRIAL_LUMEN                  | 5E-04  | 0,988 | 0,93366 | 1 |
| MITOCHONDRIAL_MATRIX                 | 5E-04  | 0,988 | 0,93366 | 1 |
| MODULE_530                           | 5E-04  | 0,989 | 0,29981 | 1 |
| SOLUTE_SODIUM_SYMPORTER_ACTIVITY     | 5E-04  | 0,989 | 0,16463 | 1 |
| RIGGINS_TAMOXIFEN_RESISTANCE_UP      | 5E-04  | 0,989 | 0,01157 | 1 |
| BERNARD_PPAPDC1B_TARGETS_DN          | -5E-04 | 0,99  | 0,02001 | 1 |
| HEMATOPOIETIN_INTERFERON_CLASSD200_D | 5E-04  | 0,99  | 0,76259 | 1 |
| GLYCEROPHOSPHOLIPID_METABOLIC_PROCES | -4E-04 | 0,99  | 0,28013 | 1 |
| NIKOLSKY_BREAST_CANCER_19Q13.1_AMPLI | 4E-04  | 0,99  | 0,75334 | 1 |
| BAKKER_FOXO3_TARGETS_UP              | -4E-04 | 0,991 | 0,17324 | 1 |
| DUTERTRE ESTRADIOL_RESPONSE_6HR_DN   | 4E-04  | 0,991 | 0,23769 | 1 |
| chr3p23                              | -4E-04 | 0,991 | 0,88843 | 1 |
| GNF2_SPTA1                           | -4E-04 | 0,991 | 0,49652 | 1 |
| AGTCAGC,MIR-345                      | -4E-04 | 0,991 | 0,25604 | 1 |
| REACTOME_ROLE_OF_SECOND_MESSENGERS.  | -3E-04 | 0,993 | 0,78972 | 1 |
| ZAMORA_NOS2_TARGETS_DN               | 3E-04  | 0,993 | 0,78288 | 1 |
| LEE_LIVER_CANCER                     | 3E-04  | 0,994 | 0,06912 | 1 |
| REACTOME_GABA_A_RECEPTOR_ACTIVATION  | -3E-04 | 0,994 | 0,32453 | 1 |
| MARTINEZ_RESPONSE_TO_TRABECTEDIN     | 2E-04  | 0,995 | 0,58769 | 1 |
| GSE12845_IGD_NEG_BLOOD_VS_PRE_GC_TC  | -2E-04 | 0,995 | 0,17917 | 1 |
| PID_RXR_VDR_PATHWAY                  | -2E-04 | 0,995 | 0,05831 | 1 |
| JOSEPH_RESPONSE_TO_SODIUM_BUTYRATE_I | -2E-04 | 0,995 | 0,90038 | 1 |
| PHOSPHOLIPID_METABOLIC_PROCESS       | -2E-04 | 0,995 | 0,23697 | 1 |
| GSE14000_UNSTIM_VS_16H_LPS_DC_TRANS  | -2E-04 | 0,996 | 0,14492 | 1 |
| GCM_TINF2                            | 2E-04  | 0,996 | 0,24744 | 1 |
| GSE37416_0H_VS_6H_F_TULARENSIS_LVS.  | -1E-04 | 0,997 | 0,61586 | 1 |
| GSE24634_TREG_VS_TCONV_POST_DAY7_IL  | -1E-04 | 0,997 | 0,93725 | 1 |
| GSE17721_4H_VS_24H_POLYIC_BMDM_DN    | -1E-04 | 0,997 | 0,99473 | 1 |
| REACTOME_INSULIN_SYNTHESIS_AND_PROCE | 1E-04  | 0,998 | 0,93971 | 1 |

|                                      |        |       |         |   |
|--------------------------------------|--------|-------|---------|---|
| WAMUNYOKOLI_OVARIAN_CANCER_GRADES_   | 9E-05  | 0,998 | 0,81776 | 1 |
| LIAN_NEUTROPHIL_GRANULE_CONSTITUENTS | -8E-05 | 0,998 | 0,8693  | 1 |
| LIU_TARGETS_OF_VMYB_VS_CMYB_UP       | -5E-05 | 0,999 | 0,15549 | 1 |
| KEGG_PPAR_SIGNALING_PATHWAY          | 3E-05  | 0,999 | 0,3729  | 1 |
| REACTOME_RESOLUTION_OF_AP_SITES_VIA_ | 2E-05  | 1     | 0,29862 | 1 |
| GKCGCNNNNNNNTGAYG_UNKNOWN            | -1E-05 | 1     | 0,63394 | 1 |
